# Supplementary material for: Thimet Oligopeptidase (EC 3.4.24.15) Key Functions Suggested by Knockout Mice Phenotype Characterization
Source: MDPI journal article supplement (doi:10.3390/biom9080382), 2019-08-19

## **Thimet oligopeptidase (EC 3.4.24.15) key functions suggested by knockout mice phenotype characterization**

Dos Santos, N.B.<sup>1#</sup>, Franco, R.D.<sup>1#</sup>, Camarini, R.<sup>1</sup>, Munhoz, C.D.<sup>1</sup>, Eichler, R.A.S.<sup>1</sup>, Gewehr, M.C.F.<sup>1</sup>, Reckziegel, P.<sup>1</sup>, Llanos, R.P.<sup>1</sup>, Dale, C.S.<sup>2</sup>, Oliveira, V.R.<sup>2</sup>, Borges, V.F.<sup>3</sup>, Lima, B.H.F.<sup>3</sup>, Cunha, F.Q.<sup>3</sup>, Visniauskas, B.<sup>4</sup>, Chagas, J.R.<sup>4</sup>, Tufik, S.<sup>4</sup>, Peres, F.F.<sup>5</sup>, Abilio, V.C.<sup>5</sup>, Florio, J.C.<sup>6</sup>, Iwai, L.K.<sup>7</sup>, Rioli, V.<sup>7</sup>, Prezoto, B.C.<sup>8</sup>, Guimaraes, A.O.<sup>9</sup>, Pesquero, J.B.<sup>9</sup>, Bader, M.<sup>10,11,12,13,14</sup>, Castro, L.M.<sup>15</sup>, and Ferro, E.S.<sup>1\*</sup>

Department of <sup>1</sup>Pharmacology and <sup>2</sup>Anatomy, Biomedical Sciences Institute, and <sup>6</sup>Department of Pathology, Veterinarian Medical School, University of São Paulo (USP), São Paulo, 05508-000; <sup>3</sup>Department of Pharmacology, Faculty of Medicine of Ribeirao Preto, University of São Paulo, Ribeirão Preto, SP, 14049-900; Departments of <sup>4</sup>Psychobiology, <sup>5</sup>Pharmacology and <sup>9</sup>Biophysics, Federal University of São Paulo (UNIFESP), São Paulo, 04023-062; <sup>7</sup>Special Laboratory of Applied Toxinology (LETA), Center of Toxins, Immune Response and Cell Signaling (CETICS), <sup>8</sup>Pharmacology Department, Butantan Institute, 05503-000, São Paulo; <sup>10</sup>Max-Delbrück-Center for Molecular Medicine, D-13125, Berlin, Germany, <sup>11</sup>Charité - Universitätsmedizin Berlin, <sup>12</sup>Berlin Institute of Health (BIH), Berlin, Germany, <sup>13</sup>DZHK (German Center for Cardiovascular Research), Partner Site Berlin, Berlin, Germany, <sup>14</sup>Institute for Biology, University of Lübeck, Lübeck, Germany, <sup>15</sup>Biosciences Institute, São Paulo State University (UNESP), São Vicente, 11330-900; SP, Brazil.

**Running Title:** THOP1 knockout mice

**\*To whom correspondence should be addressed:** Emer S. Ferro, PhD, Professor, Av. Prof. Lineu Prestes 1524, Sala 317, São Paulo, SP, 05508-000, Brazil, Phone: +55-11-3091-7310, Fax: +55-11-3091-7322, e-mail: [eferro@usp.br](mailto:eferro@usp.br)

**#These two authors contributed equally**

**Keywords:** THOP1; neurodegeneration; inflammation; sepsis; MHC-I; peptidome.

### **Organization of MS supplementary information**

1. Peptide Identification (Mascot search results).....pages 02-136
2. Peptide Quantitation
  - 2.1 Diagram of Dimethyl labeling.....page 137
  - 2.2 MS spectra from cortex peptides.....pages 138-178
  - 2.3 MS spectra from striatum peptides.....pages 179-219
  - 2.4 MS spectra from hippocampus peptides.....pages 220-268

Mascot Search Results

Peptide View

MS/MS Fragmentation of **ATVGDVNTDRPGLLDL**  
Found in **ACBP\_MOUSE** in **SwissProt**, Acyl-CoA-binding protein OS=Mus musculus GN=Dbi PE=1 SV=2

Match to Query 6508: 1682.897688 from(842.456120,2+) intensity(13946.9990) scans(9669) rawscans(sn9669) rtinseconds(3650.2103) index(7078)

Title: 7079: Scan 9669 (rt=3650.21) [C:\Users\Administrador\Desktop\AMOSTRAS NO ORBITRAP LEANDRO RODAR NOVAMENTE\CORTEX\cortex\_01.raw]

Data file cortex\_01.temp.mgf

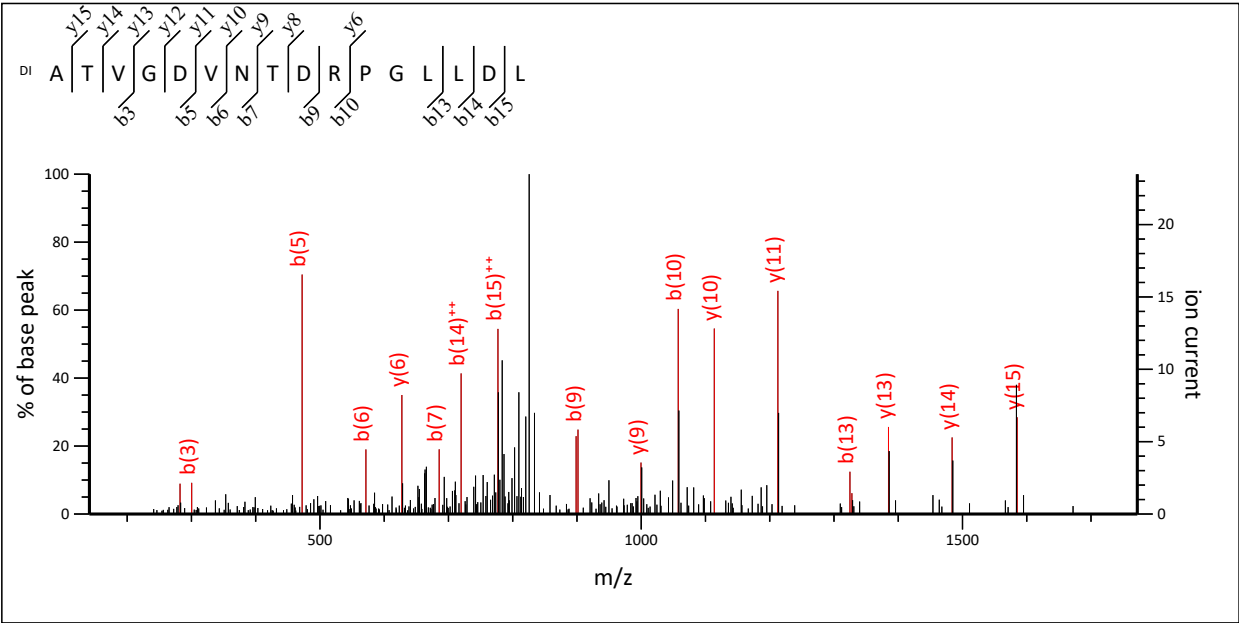

141.23 to 1772.07

Label all possible matches ☐ Label matches used for scoring ☒

Monoisotopic mass of neutral peptide Mr(calc): 1682.8839  
Variable modifications:  
N-term : Dimethyl (N-term)  
Ions Score: 65 Expect: 0.01  
Matches : 19/152 fragment ions using 29 most intense peaks ([help](#))

| #  | b         | b <sup>++</sup> | b <sup>*</sup> | b <sup>+++</sup> | b <sup>0</sup> | b <sup>0++</sup> | Seq. | y         | y <sup>++</sup> | y <sup>*</sup> | y <sup>+++</sup> | y <sup>0</sup> | y <sup>0++</sup> | #  |
|----|-----------|-----------------|----------------|------------------|----------------|------------------|------|-----------|-----------------|----------------|------------------|----------------|------------------|----|
| 1  | 100.0757  | 50.5415         |                |                  |                |                  | A    |           |                 |                |                  |                |                  | 16 |
| 2  | 201.1234  | 101.0653        |                |                  | 183.1128       | 92.0600          | T    | 1584.8228 | 792.9150        | 1567.7962      | 784.4018         | 1566.8122      | 783.9097         | 15 |
| 3  | 300.1918  | 150.5995        |                |                  | 282.1812       | 141.5942         | V    | 1483.7751 | 742.3912        | 1466.7485      | 733.8779         | 1465.7645      | 733.3859         | 14 |
| 4  | 357.2132  | 179.1103        |                |                  | 339.2027       | 170.1050         | G    | 1384.7067 | 692.8570        | 1367.6801      | 684.3437         | 1366.6961      | 683.8517         | 13 |
| 5  | 472.2402  | 236.6237        |                |                  | 454.2296       | 227.6185         | D    | 1327.6852 | 664.3462        | 1310.6587      | 655.8330         | 1309.6747      | 655.3410         | 12 |
| 6  | 571.3086  | 286.1579        |                |                  | 553.2980       | 277.1527         | V    | 1212.6583 | 606.8328        | 1195.6317      | 598.3195         | 1194.6477      | 597.8275         | 11 |
| 7  | 685.3515  | 343.1794        | 668.3250       | 334.6661         | 667.3410       | 334.1741         | N    | 1113.5899 | 557.2986        | 1096.5633      | 548.7853         | 1095.5793      | 548.2933         | 10 |
| 8  | 786.3992  | 393.7032        | 769.3727       | 385.1900         | 768.3886       | 384.6980         | T    | 999.5469  | 500.2771        | 982.5204       | 491.7638         | 981.5364       | 491.2718         | 9  |
| 9  | 901.4262  | 451.2167        | 884.3996       | 442.7034         | 883.4156       | 442.2114         | D    | 898.4993  | 449.7533        | 881.4727       | 441.2400         | 880.4887       | 440.7480         | 8  |
| 10 | 1057.5273 | 529.2673        | 1040.5007      | 520.7540         | 1039.5167      | 520.2620         | R    | 783.4723  | 392.2398        | 766.4458       | 383.7265         | 765.4617       | 383.2345         | 7  |
| 11 | 1154.5800 | 577.7937        | 1137.5535      | 569.2804         | 1136.5695      | 568.7884         | P    | 627.3712  | 314.1892        |                |                  | 609.3606       | 305.1840         | 6  |
| 12 | 1211.6015 | 606.3044        | 1194.5749      | 597.7911         | 1193.5909      | 597.2991         | G    | 530.3184  | 265.6629        |                |                  | 512.3079       | 256.6576         | 5  |
| 13 | 1324.6856 | 662.8464        | 1307.6590      | 654.3331         | 1306.6750      | 653.8411         | L    | 473.2970  | 237.1521        |                |                  | 455.2864       | 228.1468         | 4  |
| 14 | 1437.7696 | 719.3884        | 1420.7431      | 710.8752         | 1419.7591      | 710.3832         | L    | 360.2129  | 180.6101        |                |                  | 342.2023       | 171.6048         | 3  |
| 15 | 1552.7966 | 776.9019        | 1535.7700      | 768.3886         | 1534.7860      | 767.8966         | D    | 247.1288  | 124.0681        |                |                  | 229.1183       | 115.0628         | 2  |
| 16 |           |                 |                |                  |                |                  | L    | 132.1019  | 66.5546         |                |                  |                |                  | 1  |

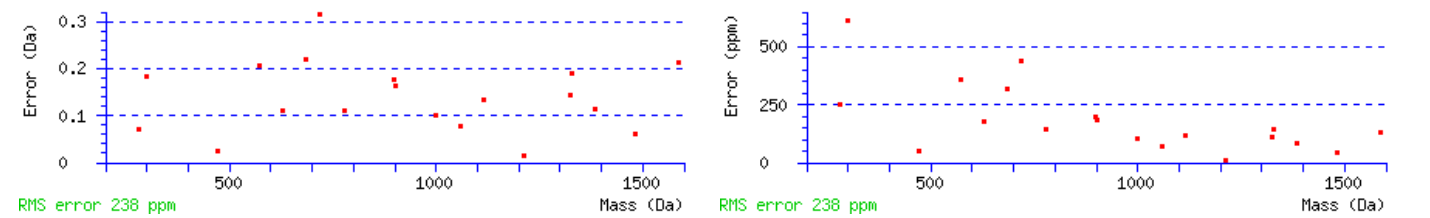

NCBI BLAST search of [ATVGDVNTDRPGLLDL](#)  
(Parameters: blastp, nr protein database, expect=20000, no filter, PAM30)  
Other BLAST [web gateways](#)

All matches to this query

| Score | Mr(calc)  | Delta   | Sequence                           |
|-------|-----------|---------|------------------------------------|
| 64.9  | 1682.8839 | 0.0138  | <a href="#">ATVGDVNTDRPGLLDL</a>   |
| 18.8  | 1682.9931 | -0.0954 | <a href="#">ATVPETGRKDTVVKV</a>    |
| 14.8  | 1682.9310 | -0.0333 | <a href="#">KVTAMIPLGHMGDPE</a>    |
| 12.9  | 1682.9203 | -0.0226 | <a href="#">DKNGKLEDEVLP SR</a>    |
| 12.2  | 1682.9138 | -0.0161 | <a href="#">ATVVAAVDMARVREPA</a>   |
| 10.6  | 1682.6485 | 0.2492  | <a href="#">CGCGNRGMQGNLDTCC</a>   |
| 10.6  | 1682.8927 | 0.0050  | <a href="#">ATVTQMHFLPGQGRL</a>    |
| 10.4  | 1682.8566 | 0.0411  | <a href="#">PLGGDHFAGGGDLASAPL</a> |
| 10.3  | 1682.8841 | 0.0135  | <a href="#">SGTTTSGGGGRTRREAP</a>  |
| 10.1  | 1682.9167 | -0.0190 | <a href="#">LAMERDGSSGGVIRLA</a>   |

Mascot: <http://www.matrixscience.com/>

**ATVGDVNTDRPGLLDL**

# Mascot Search Results

## Peptide View

MS/MS Fragmentation of **GDVNTDRPGLLDL**  
Found in **ACBP\_MOUSE** in **SwissProt**, Acyl-CoA-binding protein OS=Mus musculus GN=Dbi PE=1 SV=2

Match to Query 4471: 1411.736668 from(706.875610,2+) intensity(36356.2890) scans(8478) rawscans(sn8478) rtinseconds(3197.2789) index(6025)

Title: 6026: Scan 8478 (rt=3197.28) [C:\Users\Administrador\Desktop\AMOSTRAS NO ORBITRAP LEANDRO RODAR NOVAMENTE\HIPOCAMPO\hipocampo\_01.raw]  
Data file hipocampo\_01.temp.mgf

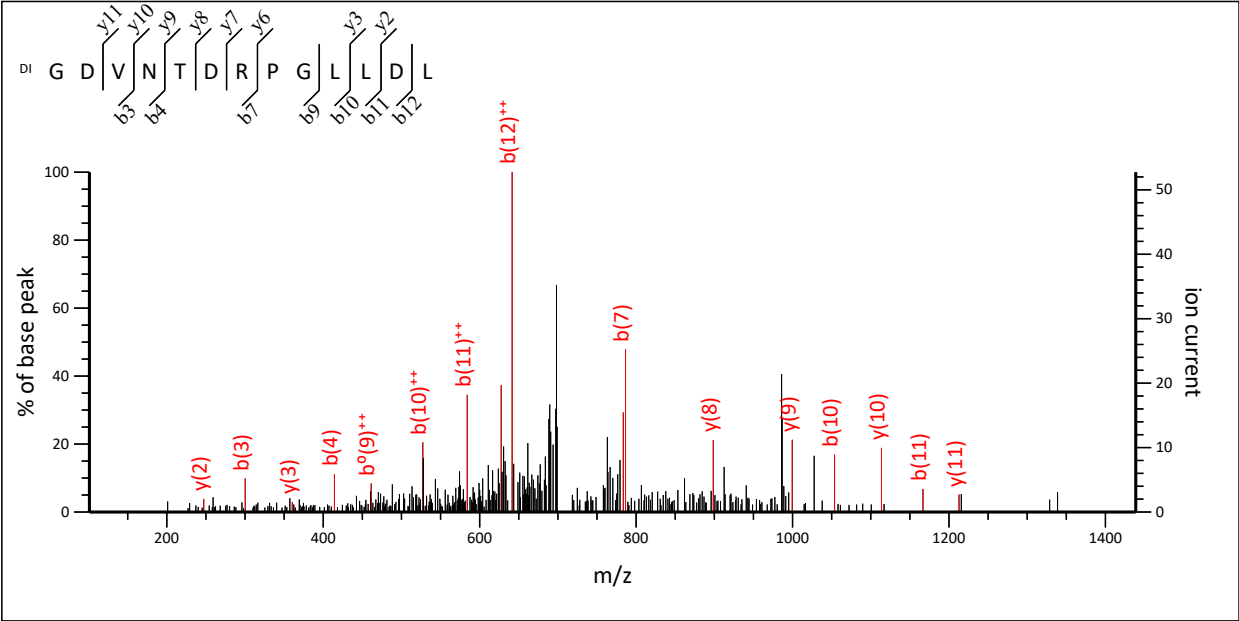



101.07 to 1438.8



Label all possible matches ☐ Label matches used for scoring ☒

Monoisotopic mass of neutral peptide Mr(calc): 1411.7307  
Variable modifications:  
N-term : Dimethyl (N-term)  
Ions Score: 47 Expect: 0.67  
Matches : 17/122 fragment ions using 34 most intense peaks ([help](#))

| #  | b         | b <sup>++</sup> | b <sup>*</sup> | b <sup>+++</sup> | b <sup>0</sup> | b <sup>0++</sup> | Seq. | y         | y <sup>++</sup> | y <sup>*</sup> | y <sup>+++</sup> | y <sup>0</sup> | y <sup>0++</sup> | #  |
|----|-----------|-----------------|----------------|------------------|----------------|------------------|------|-----------|-----------------|----------------|------------------|----------------|------------------|----|
| 1  | 86.0600   | 43.5337         |                |                  |                |                  | G    |           |                 |                |                  |                |                  | 13 |
| 2  | 201.0870  | 101.0471        |                |                  | 183.0764       | 92.0418          | D    | 1327.6852 | 664.3462        | 1310.6587      | 655.8330         | 1309.6747      | 655.3410         | 12 |
| 3  | 300.1554  | 150.5813        |                |                  | 282.1448       | 141.5761         | V    | 1212.6583 | 606.8328        | 1195.6317      | 598.3195         | 1194.6477      | 597.8275         | 11 |
| 4  | 414.1983  | 207.6028        | 397.1718       | 199.0895         | 396.1878       | 198.5975         | N    | 1113.5899 | 557.2986        | 1096.5633      | 548.7853         | 1095.5793      | 548.2933         | 10 |
| 5  | 515.2460  | 258.1266        | 498.2195       | 249.6134         | 497.2354       | 249.1214         | T    | 999.5469  | 500.2771        | 982.5204       | 491.7638         | 981.5364       | 491.2718         | 9  |
| 6  | 630.2729  | 315.6401        | 613.2464       | 307.1268         | 612.2624       | 306.6348         | D    | 898.4993  | 449.7533        | 881.4727       | 441.2400         | 880.4887       | 440.7480         | 8  |
| 7  | 786.3741  | 393.6907        | 769.3475       | 385.1774         | 768.3635       | 384.6854         | R    | 783.4723  | 392.2398        | 766.4458       | 383.7265         | 765.4618       | 383.2345         | 7  |
| 8  | 883.4268  | 442.2170        | 866.4003       | 433.7038         | 865.4163       | 433.2118         | P    | 627.3712  | 314.1892        |                |                  | 609.3606       | 305.1840         | 6  |
| 9  | 940.4483  | 470.7278        | 923.4217       | 462.2145         | 922.4377       | 461.7225         | G    | 530.3184  | 265.6629        |                |                  | 512.3079       | 256.6576         | 5  |
| 10 | 1053.5323 | 527.2698        | 1036.5058      | 518.7565         | 1035.5218      | 518.2645         | L    | 473.2970  | 237.1521        |                |                  | 455.2864       | 228.1468         | 4  |
| 11 | 1166.6164 | 583.8118        | 1149.5899      | 575.2986         | 1148.6058      | 574.8066         | L    | 360.2129  | 180.6101        |                |                  | 342.2023       | 171.6048         | 3  |
| 12 | 1281.6434 | 641.3253        | 1264.6168      | 632.8120         | 1263.6328      | 632.3200         | D    | 247.1288  | 124.0681        |                |                  | 229.1183       | 115.0628         | 2  |
| 13 |           |                 |                |                  |                |                  | L    | 132.1019  | 66.5546         |                |                  |                |                  | 1  |

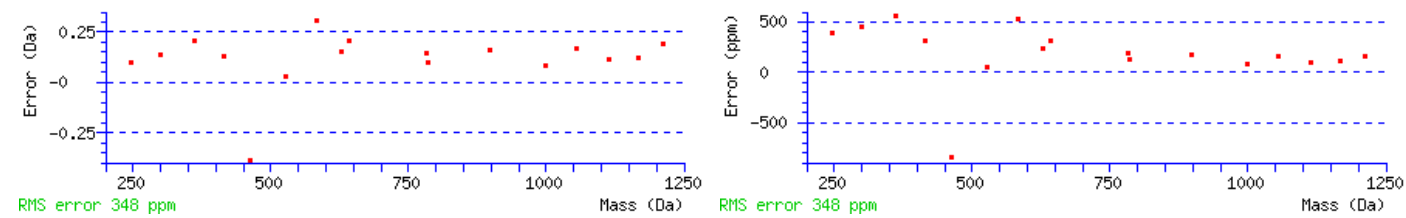

NCBI BLAST search of [GDVNTDRPGLLDL](#)  
(Parameters: blastp, nr protein database, expect=20000, no filter, PAM30)  
Other BLAST [web gateways](#)

All matches to this query

| Score | Mr(calc)  | Delta   | Sequence                          |
|-------|-----------|---------|-----------------------------------|
| 46.6  | 1411.7307 | 0.0060  | <a href="#">GDVNTDRPGLLDL</a>     |
| 21.5  | 1411.7895 | -0.0529 | <a href="#">RDVAGGLRSLAQAA</a>    |
| 19.7  | 1411.8203 | -0.0836 | <a href="#">FPYKNLPIEDL</a>       |
| 19.7  | 1411.8333 | -0.0966 | <a href="#">ICRKDLLARNL</a>       |
| 19.7  | 1411.8973 | -0.1606 | <a href="#">KREADLVQLNL</a>       |
| 17.9  | 1411.7537 | -0.0170 | <a href="#">SFFIGDSGIPLEV</a>     |
| 16.2  | 1411.8224 | -0.0857 | <a href="#">SLASLPALASQPAL</a>    |
| 15.9  | 1411.7307 | 0.0059  | <a href="#">GTGLGLGGGSPGASTPV</a> |
| 15.8  | 1411.5761 | 0.1605  | <a href="#">CPAGFHGVHCENN</a>     |
| 15.5  | 1411.9112 | -0.1745 | <a href="#">LDEKLLNIIDL</a>       |

Mascot: <http://www.matrixscience.com/>

### Peptide View

Found in **ACBP\_MOUSE** in **SwissProt**, Acyl-CoA-binding protein OS=Mus musculus GN=Dbi PE=1 SV=2

Title: 6402: Scan 11111 (rt=3418.99) [C:\Users\Administrador\Desktop\AMOSTRAS NO ORBITRAP LEANDRO RODAR NOVAMENTE\HIPOCAMPO\hipocampo\_04.raw]  
Data file hipocampo\_04.temp.mgf

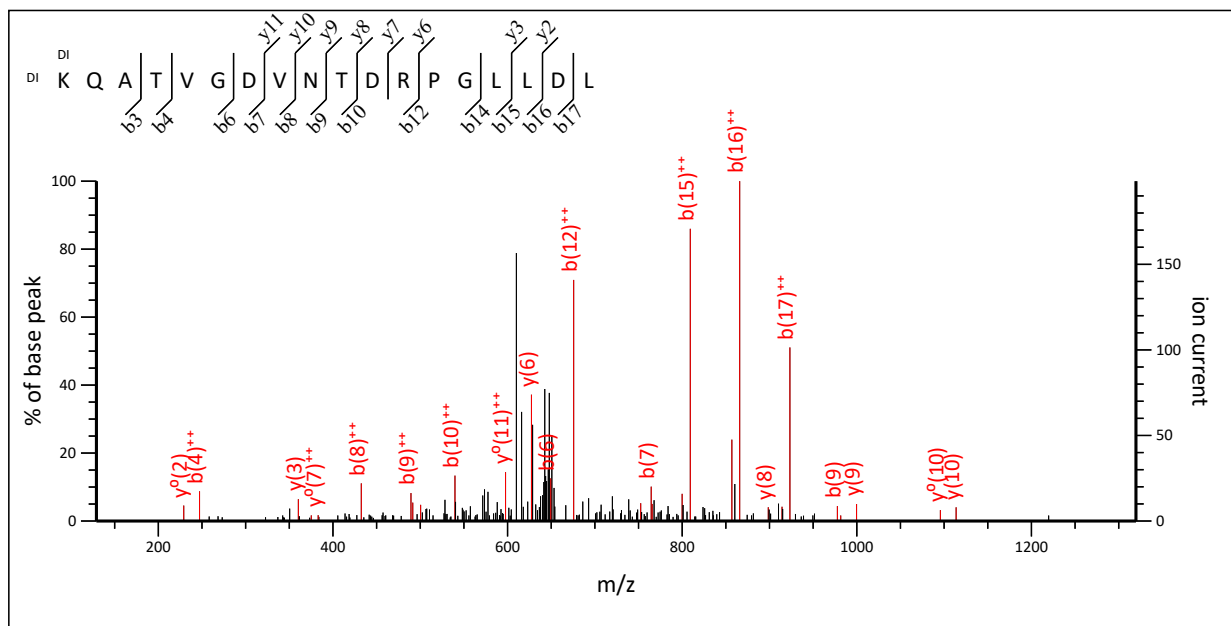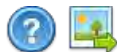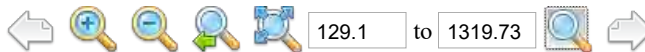

Label all possible matches ☐ Label matches used for scoring ☒

Matches : 36/184 fragment ions using 58 most intense peaks ([help](#))

| #  | <b>b</b>  | <b>b<sup>++</sup></b> | <b>b<sup>*</sup></b> | <b>b<sup>*++</sup></b> | <b>b<sup>0</sup></b> | <b>b<sup>0++</sup></b> | Seq. | y         | y <sup>++</sup> | y <sup>*</sup> | y <sup>*++</sup> | y <sup>0</sup> | y <sup>0++</sup> | #  |
|----|-----------|-----------------------|----------------------|------------------------|----------------------|------------------------|------|-----------|-----------------|----------------|------------------|----------------|------------------|----|
| 1  | 193.2151  | 97.1112               | 176.1885             | 88.5979                |                      |                        | K    |           |                 |                |                  |                |                  | 18 |
| 2  | 321.2736  | 161.1405              | 304.2471             | 152.6272               |                      |                        | Q    | 1783.9185 | 892.4629        | 1766.8919      | 883.9496         | 1765.9079      | 883.4576         | 17 |
| 3  | 392.3107  | 196.6590              | 375.2842             | 188.1457               |                      |                        | A    | 1655.8599 | 828.4336        | 1638.8333      | 819.9203         | 1637.8493      | 819.4283         | 16 |
| 4  | 493.3584  | 247.1829              | 476.3319             | 238.6696               | 475.3479             | 238.1776               | T    | 1584.8228 | 792.9150        | 1567.7962      | 784.4018         | 1566.8122      | 783.9097         | 15 |
| 5  | 592.4268  | 296.7171              | 575.4003             | 288.2038               | 574.4163             | 287.7118               | V    | 1483.7751 | 742.3912        | 1466.7485      | 733.8779         | 1465.7645      | 733.3859         | 14 |
| 6  | 649.4483  | 325.2278              | 632.4218             | 316.7145               | 631.4377             | 316.2225               | G    | 1384.7067 | 692.8570        | 1367.6801      | 684.3437         | 1366.6961      | 683.8517         | 13 |
| 7  | 764.4752  | 382.7413              | 747.4487             | 374.2280               | 746.4647             | 373.7360               | D    | 1327.6852 | 664.3462        | 1310.6587      | 655.8330         | 1309.6747      | 655.3410         | 12 |
| 8  | 863.5437  | 432.2755              | 846.5171             | 423.7622               | 845.5331             | 423.2702               | V    | 1212.6583 | 606.8328        | 1195.6317      | 598.3195         | 1194.6477      | 597.8275         | 11 |
| 9  | 977.5866  | 489.2969              | 960.5600             | 480.7837               | 959.5760             | 480.2916               | N    | 1113.5899 | 557.2986        | 1096.5633      | 548.7853         | 1095.5793      | 548.2933         | 10 |
| 10 | 1078.6343 | 539.8208              | 1061.6077            | 531.3075               | 1060.6237            | 530.8155               | T    | 999.5469  | 500.2771        | 982.5204       | 491.7638         | 981.5364       | 491.2718         | 9  |
| 11 | 1193.6612 | 597.3342              | 1176.6347            | 588.8210               | 1175.6506            | 588.3290               | D    | 898.4993  | 449.7533        | 881.4727       | 441.2400         | 880.4887       | 440.7480         | 8  |
| 12 | 1349.7623 | 675.3848              | 1332.7358            | 666.8715               | 1331.7518            | 666.3795               | R    | 783.4723  | 392.2398        | 766.4458       | 383.7265         | 765.4617       | 383.2345         | 7  |
| 13 | 1446.8151 | 723.9112              | 1429.7885            | 715.3979               | 1428.8045            | 714.9059               | P    | 627.3712  | 314.1892        |                |                  | 609.3606       | 305.1840         | 6  |
| 14 | 1503.8365 | 752.4219              | 1486.8100            | 743.9086               | 1485.8260            | 743.4166               | G    | 530.3184  | 265.6629        |                |                  | 512.3079       | 256.6576         | 5  |
| 15 | 1616.9206 | 808.9639              | 1599.8941            | 800.4507               | 1598.9100            | 799.9587               | L    | 473.2970  | 237.1521        |                |                  | 455.2864       | 228.1468         | 4  |
| 16 | 1730.0047 | 865.5060              | 1712.9781            | 856.9927               | 1711.9941            | 856.5007               | L    | 360.2129  | 180.6101        |                |                  | 342.2023       | 171.6048         | 3  |
| 17 | 1845.0316 | 923.0194              | 1828.0051            | 914.5062               | 1827.0211            | 914.0142               | D    | 247.1288  | 124.0681        |                |                  | 229.1183       | 115.0628         | 2  |
| 18 |           |                       |                      |                        |                      |                        | L    | 132.1019  | 66.5546         |                |                  |                |                  | 1  |

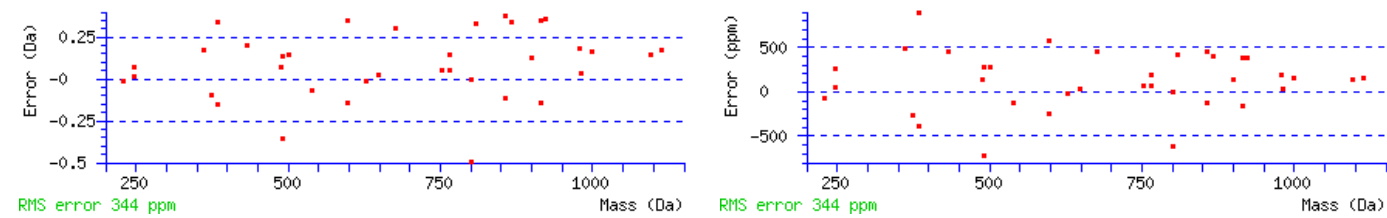

NCBI **BLAST** search of [KQATVGDVNTDRPGLLDL](#)  
(Parameters: blastp, nr protein database, expect=20000, no filter, PAM30)  
Other BLAST [web gateways](#)

All matches to this query

| Score | Mr(calc)  | Delta   | Sequence                           |
|-------|-----------|---------|------------------------------------|
| 57.4  | 1975.1190 | 0.0028  | <a href="#">KQATVGDVNTDRPGLLDL</a> |
| 35.0  | 1974.9839 | 0.1379  | <a href="#">RFQPTYPYVQHEIDL</a>    |
| 31.1  | 1974.9750 | 0.1468  | <a href="#">YTMNNGGSINSSTHLLDL</a> |
| 23.7  | 1975.1367 | -0.0149 | <a href="#">FAKVFDAREIKQNAR</a>    |
| 22.0  | 1974.8663 | 0.2555  | <a href="#">CDLISDMGNLVHATNSEE</a> |
| 22.0  | 1975.3664 | -0.2446 | <a href="#">TLAISAKGIADKLLLLDL</a> |
| 21.2  | 1975.1106 | 0.0112  | <a href="#">CAQQQLLTRLHFILD</a>    |
| 21.1  | 1975.1171 | 0.0047  | <a href="#">PRDIERPLDILSDL</a>     |
| 21.1  | 1975.0900 | 0.0319  | <a href="#">TAIHEVMEQQTISIAKA</a>  |
| 20.9  | 1975.2070 | -0.0852 | <a href="#">PLTAFANLRKLERLDI</a>   |

Mascot: <http://www.matrixscience.com/>



Mascot Search Results

Peptide View

MS/MS Fragmentation of **KQATVGDVNTDRPGLLDL**  
Found in **ACBP\_MOUSE** in **SwissProt**, Acyl-CoA-binding protein OS=Mus musculus GN=Dbi PE=1 SV=2

Match to Query 7527: 1967.069428 from(984.541990,2+) intensity(29598.1250) scans(7731) rawscans(sn7731) rtinseconds(2935.691) index(5420)  
Title: 5421: Scan 7731 (rt=2935.69) [C:\Users\Administrador\Desktop\AMOSTRAS NO ORBITRAP LEANDRO RODAR NOVAMENTE\HIPOCAMPO\hipocampo\_01.raw]  
Data file hipocampo\_01.temp.mgf

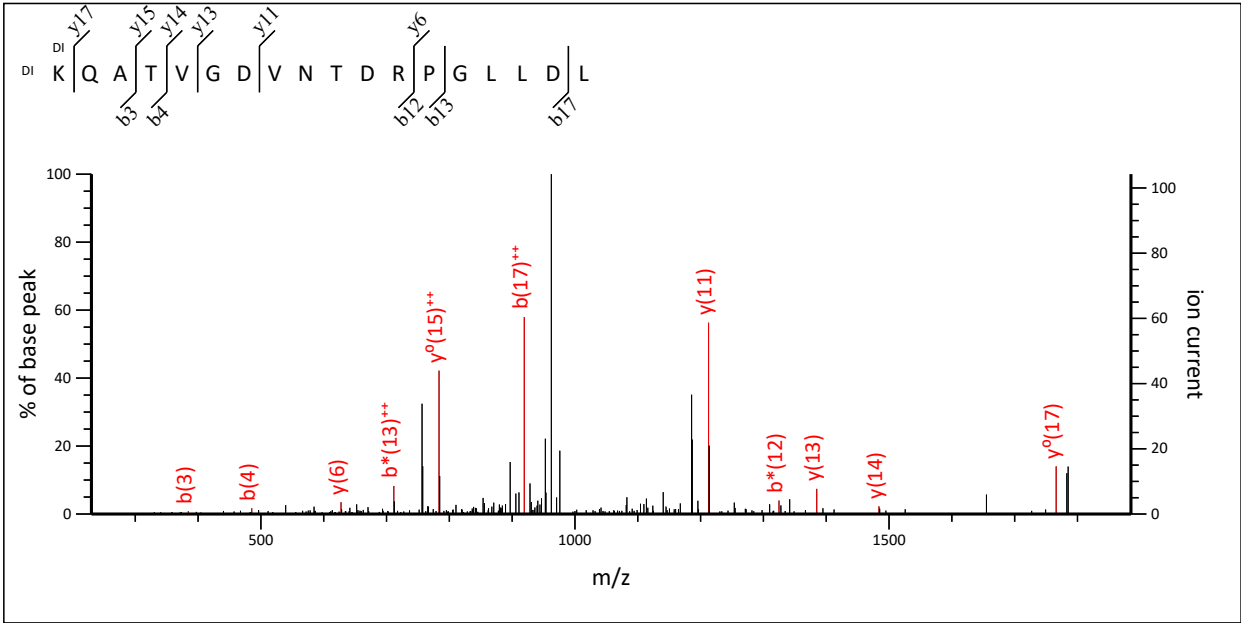

Navigation icons: ? (help), zoom in, zoom out, reset, and a range selector showing 230.2 to 1885.14.

Label all possible matches ☐ Label matches used for scoring ☒

Monoisotopic mass of neutral peptide Mr(calc): 1967.0688  
Variable modifications:  
N-term : Dimethyl (N-term)  
K1 : Dimethyl (K)  
Ions Score: 35 Expect: 10  
Matches : 13/184 fragment ions using 14 most intense peaks ([help](#))

| #  | b         | b <sup>++</sup> | b <sup>*</sup> | b <sup>+++</sup> | b <sup>0</sup> | b <sup>0++</sup> | Seq. | y         | y <sup>++</sup> | y <sup>*</sup> | y <sup>+++</sup> | y <sup>0</sup> | y <sup>0++</sup> | #  |
|----|-----------|-----------------|----------------|------------------|----------------|------------------|------|-----------|-----------------|----------------|------------------|----------------|------------------|----|
| 1  | 185.1648  | 93.0861         | 168.1383       | 84.5728          |                |                  | K    |           |                 |                |                  |                |                  | 18 |
| 2  | 313.2234  | 157.1153        | 296.1969       | 148.6021         |                |                  | Q    | 1783.9185 | 892.4629        | 1766.8919      | 883.9496         | 1765.9079      | 883.4576         | 17 |
| 3  | 384.2605  | 192.6339        | 367.2340       | 184.1206         |                |                  | A    | 1655.8599 | 828.4336        | 1638.8333      | 819.9203         | 1637.8493      | 819.4283         | 16 |
| 4  | 485.3082  | 243.1577        | 468.2817       | 234.6445         | 467.2976       | 234.1525         | T    | 1584.8228 | 792.9150        | 1567.7962      | 784.4018         | 1566.8122      | 783.9097         | 15 |
| 5  | 584.3766  | 292.6920        | 567.3501       | 284.1787         | 566.3661       | 283.6867         | V    | 1483.7751 | 742.3912        | 1466.7485      | 733.8779         | 1465.7645      | 733.3859         | 14 |
| 6  | 641.3981  | 321.2027        | 624.3715       | 312.6894         | 623.3875       | 312.1974         | G    | 1384.7067 | 692.8570        | 1367.6801      | 684.3437         | 1366.6961      | 683.8517         | 13 |
| 7  | 756.4250  | 378.7162        | 739.3985       | 370.2029         | 738.4145       | 369.7109         | D    | 1327.6852 | 664.3462        | 1310.6587      | 655.8330         | 1309.6747      | 655.3410         | 12 |
| 8  | 855.4934  | 428.2504        | 838.4669       | 419.7371         | 837.4829       | 419.2451         | V    | 1212.6583 | 606.8328        | 1195.6317      | 598.3195         | 1194.6477      | 597.8275         | 11 |
| 9  | 969.5364  | 485.2718        | 952.5098       | 476.7585         | 951.5258       | 476.2665         | N    | 1113.5899 | 557.2986        | 1096.5633      | 548.7853         | 1095.5793      | 548.2933         | 10 |
| 10 | 1070.5841 | 535.7957        | 1053.5575      | 527.2824         | 1052.5735      | 526.7904         | T    | 999.5469  | 500.2771        | 982.5204       | 491.7638         | 981.5364       | 491.2718         | 9  |
| 11 | 1185.6110 | 593.3091        | 1168.5844      | 584.7959         | 1167.6004      | 584.3039         | D    | 898.4993  | 449.7533        | 881.4727       | 441.2400         | 880.4887       | 440.7480         | 8  |
| 12 | 1341.7121 | 671.3597        | 1324.6856      | 662.8464         | 1323.7015      | 662.3544         | R    | 783.4723  | 392.2398        | 766.4458       | 383.7265         | 765.4617       | 383.2345         | 7  |
| 13 | 1438.7649 | 719.8861        | 1421.7383      | 711.3728         | 1420.7543      | 710.8808         | P    | 627.3712  | 314.1892        |                |                  | 609.3606       | 305.1840         | 6  |
| 14 | 1495.7863 | 748.3968        | 1478.7598      | 739.8835         | 1477.7758      | 739.3915         | G    | 530.3184  | 265.6629        |                |                  | 512.3079       | 256.6576         | 5  |
| 15 | 1608.8704 | 804.9388        | 1591.8438      | 796.4256         | 1590.8598      | 795.9336         | L    | 473.2970  | 237.1521        |                |                  | 455.2864       | 228.1468         | 4  |
| 16 | 1721.9545 | 861.4809        | 1704.9279      | 852.9676         | 1703.9439      | 852.4756         | L    | 360.2129  | 180.6101        |                |                  | 342.2023       | 171.6048         | 3  |
| 17 | 1836.9814 | 918.9943        | 1819.9549      | 910.4811         | 1818.9708      | 909.9891         | D    | 247.1288  | 124.0681        |                |                  | 229.1183       | 115.0628         | 2  |
| 18 |           |                 |                |                  |                |                  | L    | 132.1019  | 66.5546         |                |                  |                |                  | 1  |

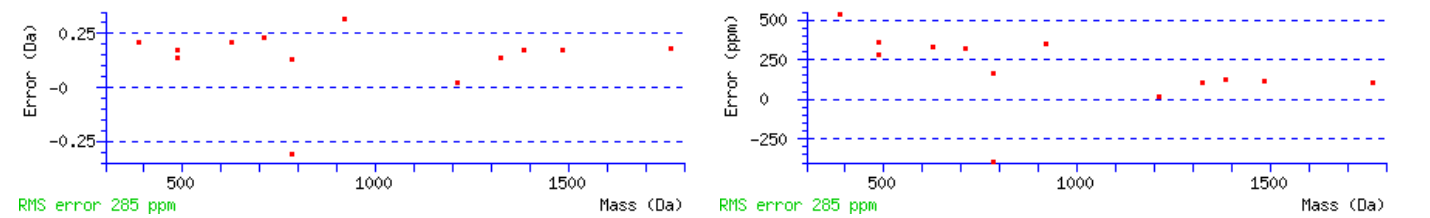

NCBI **BLAST** search of [KQATVGDVNTDRPGLLDL](#)  
(Parameters: blastp, nr protein database, expect=20000, no filter, PAM30)  
Other BLAST [web gateways](#)

All matches to this query

| Score | Mr(calc)  | Delta   | Sequence                                |
|-------|-----------|---------|-----------------------------------------|
| 34.9  | 1967.0688 | 0.0007  | <a href="#">KQATVGDVNTDRPGLLDL</a>      |
| 19.9  | 1966.9133 | 0.1561  | <a href="#">RGGSGGSGAGPGTTGAAGEFAFA</a> |
| 13.0  | 1967.0826 | -0.0132 | <a href="#">EFADSLGVPFLETSAKNA</a>      |
| 13.0  | 1967.2403 | -0.1709 | <a href="#">EVVLMKVLGGCKLLLRL</a>       |
| 12.7  | 1967.1237 | -0.0543 | <a href="#">REKLCESLGLRVADLPL</a>       |
| 12.0  | 1967.0404 | 0.0291  | <a href="#">EIIAELRYDLPALYNE</a>        |
| 11.8  | 1967.2281 | -0.1587 | <a href="#">SEAKILFLLQLLTDHI</a>        |
| 11.4  | 1967.0517 | 0.0178  | <a href="#">TIISIASNVAGHPLVWDF</a>      |
| 11.4  | 1966.9021 | 0.1674  | <a href="#">ISNNGATGTWLYRNESD</a>       |
| 11.2  | 1967.1826 | -0.1131 | <a href="#">LKGETRLNCIRIARKA</a>        |

Mascot: <http://www.matrixscience.com/>

Mascot Search Results

Peptide View

MS/MS Fragmentation of **SHFKQATVGDVNTDRPGLLDL**  
Found in **ACBP\_MOUSE** in **SwissProt**, Acyl-CoA-binding protein OS=Mus musculus GN=Dbi PE=1 SV=2

Match to Query 9570: 2346.289062 from(783.103630,3+) intensity(14550.9800) scans(7669) rawscans(sn7669) rtinseconds(2938.3815) index(5403)  
Title: 5404: Scan 7669 (rt=2938.38) [C:\Users\Administrador\Desktop\AMOSTRAS NO ORBITRAP LEANDRO RODAR  
NOVAMENTE\CORTEX\cortex\_01.raw]  
Data file cortex\_01.temp.mgf

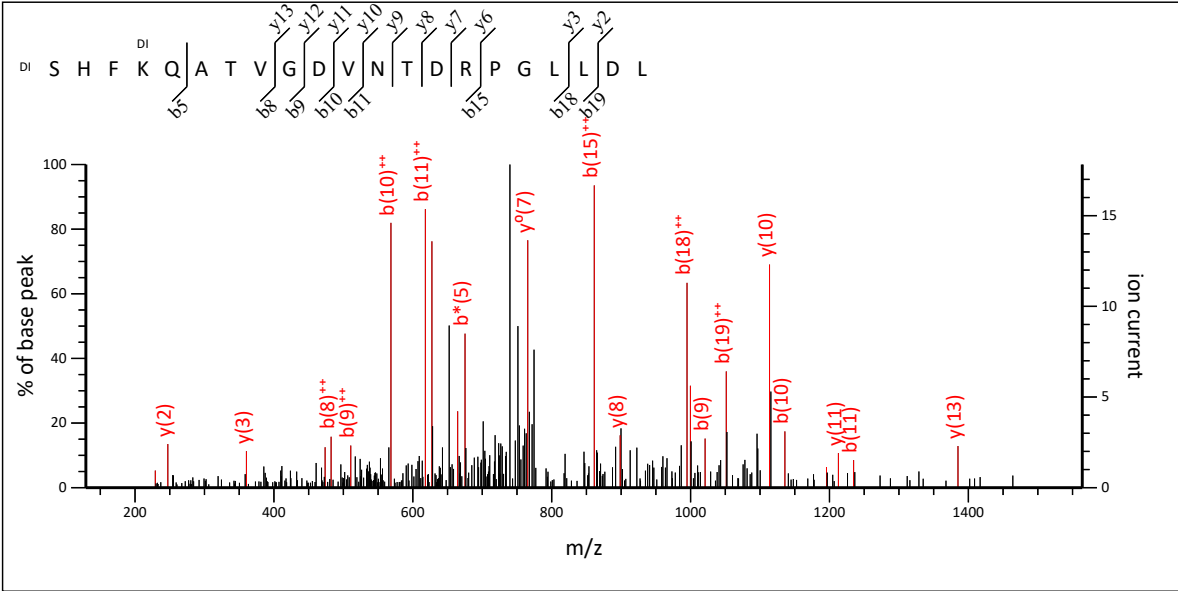

129.2 to 1564.02

Label all possible matches ☐ Label matches used for scoring ☒

Monoisotopic mass of neutral peptide Mr(calc): 2346.2784  
Variable modifications:  
N-term : Dimethyl:2H(4) (N-term)  
K4 : Dimethyl:2H(4) (K)  
Ions Score: 52 Expect: 0.2  
Matches : 27/220 fragment ions using 37 most intense peaks ([help](#))

| #  | b         | b <sup>++</sup> | b <sup>*</sup> | b <sup>*++</sup> | b <sup>0</sup> | b <sup>0++</sup> | Seq. | y         | y <sup>++</sup> | y <sup>*</sup> | y <sup>*++</sup> | y <sup>0</sup> | y <sup>0++</sup> | #  |
|----|-----------|-----------------|----------------|------------------|----------------|------------------|------|-----------|-----------------|----------------|------------------|----------------|------------------|----|
| 1  | 120.0957  | 60.5515         |                |                  | 102.0851       | 51.5462          | S    |           |                 |                |                  |                |                  | 21 |
| 2  | 257.1546  | 129.0809        |                |                  | 239.1441       | 120.0757         | H    | 2228.1972 | 1114.6022       | 2211.1706      | 1106.0889        | 2210.1866      | 1105.5969        | 20 |
| 3  | 404.2230  | 202.6152        |                |                  | 386.2125       | 193.6099         | F    | 2091.1383 | 1046.0728       | 2074.1117      | 1037.5595        | 2073.1277      | 1037.0675        | 19 |
| 4  | 564.3744  | 282.6908        | 547.3479       | 274.1776         | 546.3638       | 273.6856         | K    | 1944.0698 | 972.5386        | 1927.0433      | 964.0253         | 1926.0593      | 963.5333         | 18 |
| 5  | 692.4330  | 346.7201        | 675.4064       | 338.2069         | 674.4224       | 337.7148         | Q    | 1783.9185 | 892.4629        | 1766.8919      | 883.9496         | 1765.9079      | 883.4576         | 17 |
| 6  | 763.4701  | 382.2387        | 746.4435       | 373.7254         | 745.4595       | 373.2334         | A    | 1655.8599 | 828.4336        | 1638.8333      | 819.9203         | 1637.8493      | 819.4283         | 16 |
| 7  | 864.5178  | 432.7625        | 847.4912       | 424.2493         | 846.5072       | 423.7572         | T    | 1584.8228 | 792.9150        | 1567.7962      | 784.4018         | 1566.8122      | 783.9097         | 15 |
| 8  | 963.5862  | 482.2967        | 946.5596       | 473.7835         | 945.5756       | 473.2915         | V    | 1483.7751 | 742.3912        | 1466.7486      | 733.8779         | 1465.7645      | 733.3859         | 14 |
| 9  | 1020.6077 | 510.8075        | 1003.5811      | 502.2942         | 1002.5971      | 501.8022         | G    | 1384.7067 | 692.8570        | 1367.6801      | 684.3437         | 1366.6961      | 683.8517         | 13 |
| 10 | 1135.6346 | 568.3209        | 1118.6081      | 559.8077         | 1117.6240      | 559.3157         | D    | 1327.6852 | 664.3462        | 1310.6587      | 655.8330         | 1309.6747      | 655.3410         | 12 |
| 11 | 1234.7030 | 617.8551        | 1217.6765      | 609.3419         | 1216.6924      | 608.8499         | V    | 1212.6583 | 606.8328        | 1195.6317      | 598.3195         | 1194.6477      | 597.8275         | 11 |
| 12 | 1348.7459 | 674.8766        | 1331.7194      | 666.3633         | 1330.7354      | 665.8713         | N    | 1113.5899 | 557.2986        | 1096.5633      | 548.7853         | 1095.5793      | 548.2933         | 10 |
| 13 | 1449.7936 | 725.4004        | 1432.7671      | 716.8872         | 1431.7831      | 716.3952         | T    | 999.5469  | 500.2771        | 982.5204       | 491.7638         | 981.5364       | 491.2718         | 9  |
| 14 | 1564.8206 | 782.9139        | 1547.7940      | 774.4006         | 1546.8100      | 773.9086         | D    | 898.4993  | 449.7533        | 881.4727       | 441.2400         | 880.4887       | 440.7480         | 8  |
| 15 | 1720.9217 | 860.9645        | 1703.8951      | 852.4512         | 1702.9111      | 851.9592         | R    | 783.4723  | 392.2398        | 766.4458       | 383.7265         | 765.4617       | 383.2345         | 7  |
| 16 | 1817.9744 | 909.4909        | 1800.9479      | 900.9776         | 1799.9639      | 900.4856         | P    | 627.3712  | 314.1892        |                |                  | 609.3606       | 305.1840         | 6  |
| 17 | 1874.9959 | 938.0016        | 1857.9694      | 929.4883         | 1856.9853      | 928.9963         | G    | 530.3184  | 265.6629        |                |                  | 512.3079       | 256.6576         | 5  |
| 18 | 1988.0800 | 994.5436        | 1971.0534      | 986.0303         | 1970.0694      | 985.5383         | L    | 473.2970  | 237.1521        |                |                  | 455.2864       | 228.1468         | 4  |
| 19 | 2101.1640 | 1051.0857       | 2084.1375      | 1042.5724        | 2083.1535      | 1042.0804        | L    | 360.2129  | 180.6101        |                |                  | 342.2023       | 171.6048         | 3  |
| 20 | 2216.1910 | 1108.5991       | 2199.1644      | 1100.0858        | 2198.1804      | 1099.5938        | D    | 247.1288  | 124.0681        |                |                  | 229.1183       | 115.0628         | 2  |
| 21 |           |                 |                |                  |                |                  | L    | 132.1019  | 66.5546         |                |                  |                |                  | 1  |

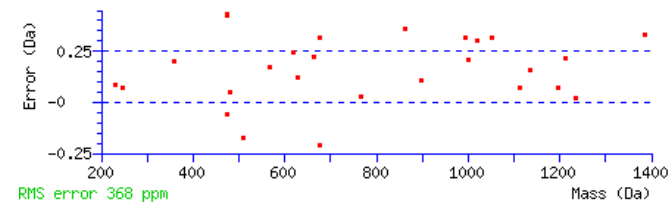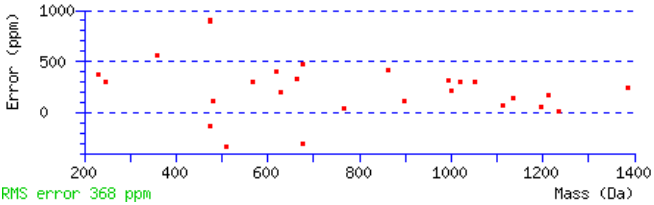

NCBI BLAST search of [SHFKQATVGDVNTDRPGLLDL](#)  
(Parameters: blastp, nr protein database, expect=20000, no filter, PAM30)  
Other BLAST [web gateways](#)

All matches to this query

| Score | Mr(calc)  | Delta   | Sequence                               |
|-------|-----------|---------|----------------------------------------|
| 52.4  | 2346.2784 | 0.0107  | <a href="#">SHFKQATVGDVNTDRPGLLDL</a>  |
| 19.7  | 2346.2040 | 0.0851  | <a href="#">MVVQVVIGEQRGEGVFMAARC</a>  |
| 18.2  | 2346.1301 | 0.1590  | <a href="#">FDVLSSSEGGVATGTFSLEAMK</a> |
| 17.2  | 2346.2563 | 0.0328  | <a href="#">LLRNMVGAGEVDEDELEVETK</a>  |
| 16.7  | 2346.3370 | -0.0480 | <a href="#">ATKKFRRSVLLSVDECEEV</a>    |
| 16.4  | 2346.5192 | -0.2302 | <a href="#">LLPKVLVQATVFARMAPEQK</a>   |
| 16.3  | 2346.2907 | -0.0016 | <a href="#">GTIHIQVTSEVLEQRIVQQV</a>   |
| 16.2  | 2346.1604 | 0.1286  | <a href="#">YQVHDRNATVDKLEDFINN</a>    |
| 15.9  | 2346.0798 | 0.2093  | <a href="#">CGNFDSVPGDDVNEHIASSKIS</a> |
| 15.1  | 2346.2919 | -0.0028 | <a href="#">EPTPGLSREVIRFLLEQTVM</a>   |

Mascot: <http://www.matrixscience.com/>

Mascot Search Results

Peptide View

MS/MS Fragmentation of **TVGDVNTDRPGLLDL**  
Found in **ACBP\_MOUSE** in **SwissProt**, Acyl-CoA-binding protein OS=Mus musculus GN=Dbi PE=1 SV=2

Match to Query 5594: 1611.851988 from(806.933270,2+) intensity(92331.3520) scans(9395) rawscans(sn9395) rtinseconds(3525.0802) index(6752)

Title: 6753: Scan 9395 (rt=3525.08) [C:\Users\Administrador\Desktop\AMOSTRAS NO ORBITRAP LEANDRO RODAR NOVAMENTE\HIPOCAMPO\hipocampo\_01.raw]

Data file hipocampo\_01.temp.mgf

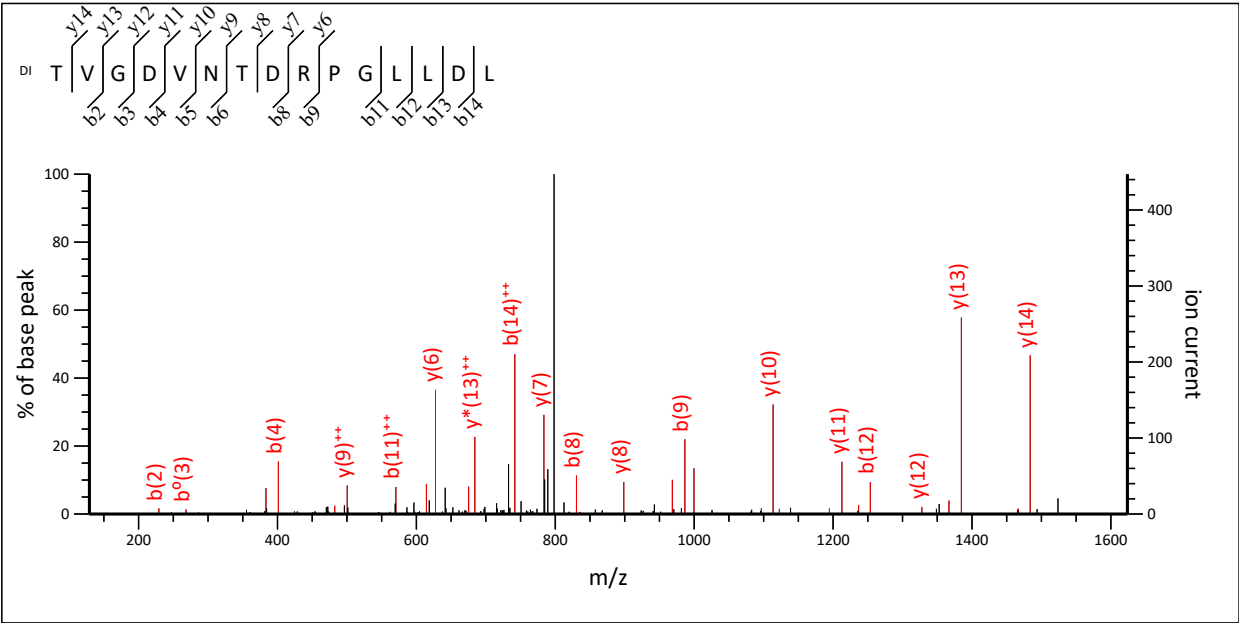

129.21 to 1623.82

Label all possible matches ☐ Label matches used for scoring ☒

Monoisotopic mass of neutral peptide Mr(calc): 1611.8468  
Variable modifications:  
N-term : Dimethyl (N-term)  
Ions Score: 85 Expect: 0.0001  
Matches : 40/144 fragment ions using 39 most intense peaks ([help](#))

| #  | b         | b <sup>++</sup> | b <sup>*</sup> | b <sup>+++</sup> | b <sup>0</sup> | b <sup>0++</sup> | Seq. | y         | y <sup>++</sup> | y <sup>*</sup> | y <sup>+++</sup> | y <sup>0</sup> | y <sup>0++</sup> | #  |
|----|-----------|-----------------|----------------|------------------|----------------|------------------|------|-----------|-----------------|----------------|------------------|----------------|------------------|----|
| 1  | 130.0863  | 65.5468         |                |                  | 112.0757       | 56.5415          | T    |           |                 |                |                  |                |                  | 15 |
| 2  | 229.1547  | 115.0810        |                |                  | 211.1441       | 106.0757         | V    | 1483.7751 | 742.3912        | 1466.7485      | 733.8779         | 1465.7645      | 733.3859         | 14 |
| 3  | 286.1761  | 143.5917        |                |                  | 268.1656       | 134.5864         | G    | 1384.7067 | 692.8570        | 1367.6801      | 684.3437         | 1366.6961      | 683.8517         | 13 |
| 4  | 401.2031  | 201.1052        |                |                  | 383.1925       | 192.0999         | D    | 1327.6852 | 664.3462        | 1310.6587      | 655.8330         | 1309.6747      | 655.3410         | 12 |
| 5  | 500.2715  | 250.6394        |                |                  | 482.2609       | 241.6341         | V    | 1212.6583 | 606.8328        | 1195.6317      | 598.3195         | 1194.6477      | 597.8275         | 11 |
| 6  | 614.3144  | 307.6608        | 597.2879       | 299.1476         | 596.3039       | 298.6556         | N    | 1113.5899 | 557.2986        | 1096.5633      | 548.7853         | 1095.5793      | 548.2933         | 10 |
| 7  | 715.3621  | 358.1847        | 698.3355       | 349.6714         | 697.3515       | 349.1794         | T    | 999.5469  | 500.2771        | 982.5204       | 491.7638         | 981.5364       | 491.2718         | 9  |
| 8  | 830.3890  | 415.6982        | 813.3625       | 407.1849         | 812.3785       | 406.6929         | D    | 898.4993  | 449.7533        | 881.4727       | 441.2400         | 880.4887       | 440.7480         | 8  |
| 9  | 986.4901  | 493.7487        | 969.4636       | 485.2354         | 968.4796       | 484.7434         | R    | 783.4723  | 392.2398        | 766.4458       | 383.7265         | 765.4617       | 383.2345         | 7  |
| 10 | 1083.5429 | 542.2751        | 1066.5164      | 533.7618         | 1065.5323      | 533.2698         | P    | 627.3712  | 314.1892        |                |                  | 609.3606       | 305.1840         | 6  |
| 11 | 1140.5644 | 570.7858        | 1123.5378      | 562.2726         | 1122.5538      | 561.7805         | G    | 530.3184  | 265.6629        |                |                  | 512.3079       | 256.6576         | 5  |
| 12 | 1253.6484 | 627.3279        | 1236.6219      | 618.8146         | 1235.6379      | 618.3226         | L    | 473.2970  | 237.1521        |                |                  | 455.2864       | 228.1468         | 4  |
| 13 | 1366.7325 | 683.8699        | 1349.7060      | 675.3566         | 1348.7219      | 674.8646         | L    | 360.2129  | 180.6101        |                |                  | 342.2023       | 171.6048         | 3  |
| 14 | 1481.7594 | 741.3834        | 1464.7329      | 732.8701         | 1463.7489      | 732.3781         | D    | 247.1288  | 124.0681        |                |                  | 229.1183       | 115.0628         | 2  |
| 15 |           |                 |                |                  |                |                  | L    | 132.1019  | 66.5546         |                |                  |                |                  | 1  |

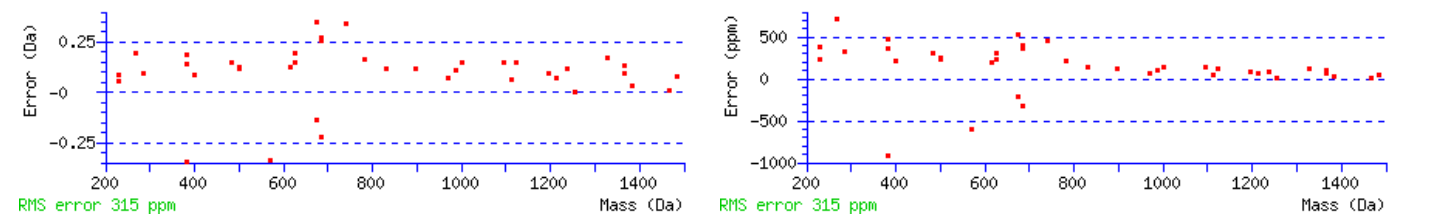

NCBI BLAST search of [TVGDVNTDRPGLLDL](#)  
(Parameters: blastp, nr protein database, expect=20000, no filter, PAM30)  
Other BLAST [web gateways](#)

All matches to this query

| Score | Mr(calc)  | Delta   | Sequence                           |
|-------|-----------|---------|------------------------------------|
| 84.9  | 1611.8468 | 0.0052  | <a href="#">TVGDVNTDRPGLLDL</a>    |
| 29.9  | 1611.8719 | -0.0200 | <a href="#">LSISASKSVPEVPEG</a>    |
| 29.6  | 1611.7678 | 0.0842  | <a href="#">GEQQPDTRPEDLPG</a>     |
| 28.2  | 1611.8658 | -0.0138 | <a href="#">PVTPTSQSVPSIPSIP</a>   |
| 28.2  | 1611.9147 | -0.0627 | <a href="#">RHLTSGNWEVIRI</a>      |
| 25.4  | 1611.7992 | 0.0528  | <a href="#">TLQGQELSTEPDGPL</a>    |
| 25.3  | 1611.9406 | -0.0887 | <a href="#">KEAVPSVAPSGLSGGGGA</a> |
| 25.2  | 1611.9573 | -0.1053 | <a href="#">SLRELGVWRSLLR</a>      |
| 25.1  | 1611.9058 | -0.0538 | <a href="#">VLCGLIWASAALASLP</a>   |
| 24.9  | 1611.7127 | 0.1393  | <a href="#">EQDVQLYCDFPDI</a>      |

Mascot: <http://www.matrixscience.com/>

Mascot Search Results

Peptide View

MS/MS Fragmentation of **VEKVDELKKKYGI**  
Found in **ACBP\_MOUSE** in **SwissProt**, Acyl-CoA-binding protein OS=Mus musculus GN=Dbi PE=1 SV=2

Match to Query 6057: 1688.053872 from(563.691900,3+) intensity(158413.2800) scans(5190) rawscans(sn5190) rtinseconds(2058.7076) index(3181)  
Title: 3182: Scan 5190 (rt=2058.71) [C:\Users\Administrador\Desktop\AMOSTRAS NO ORBITRAP LEANDRO RODAR NOVAMENTE\HIPOCAMPO\hipocampo\_01.raw]  
Data file hipocampo\_01.temp.mgf

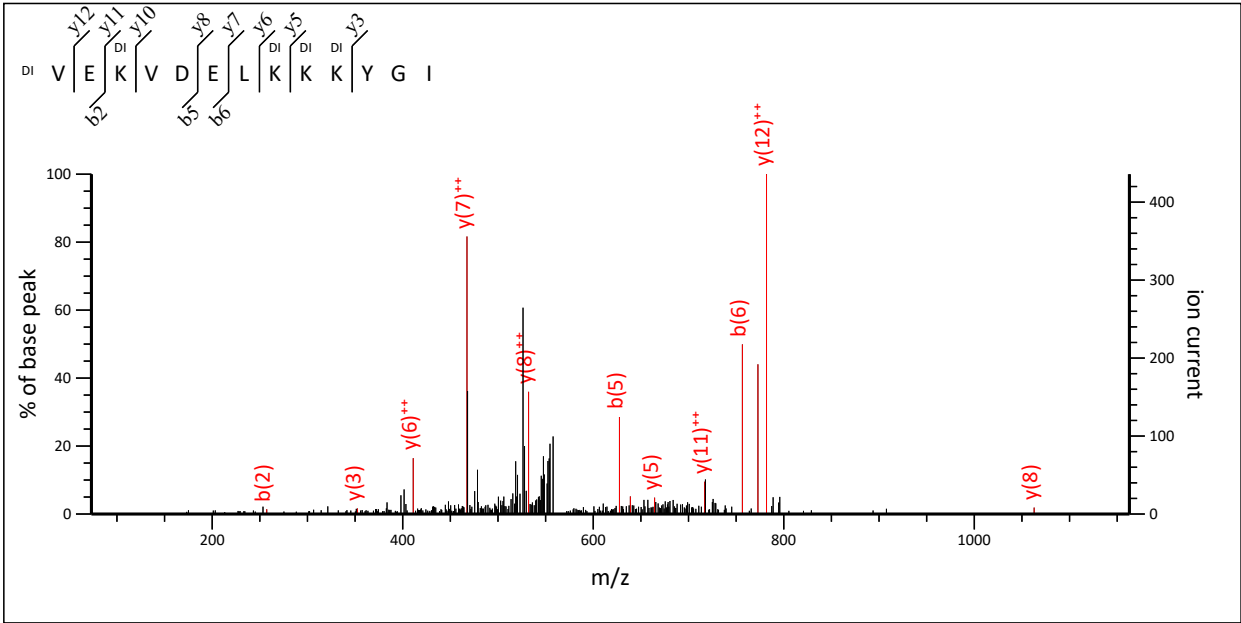

73.23 to 1162.83

Label all possible matches ☐ Label matches used for scoring ☒

Monoisotopic mass of neutral peptide Mr(calc): 1688.0488  
Variable modifications:  
N-term : Dimethyl (N-term)  
K3 : Dimethyl (K)  
K8 : Dimethyl (K)  
K9 : Dimethyl (K)  
K10 : Dimethyl (K)  
Ions Score: 23 Expect: 1.4e+002  
Matches : 14/118 fragment ions using 31 most intense peaks ([help](#))

| #  | b         | b <sup>++</sup> | b <sup>*</sup> | b <sup>+++</sup> | b <sup>0</sup> | b <sup>0++</sup> | Seq. | y         | y <sup>++</sup> | y <sup>*</sup> | y <sup>+++</sup> | y <sup>0</sup> | y <sup>0++</sup> | #  |
|----|-----------|-----------------|----------------|------------------|----------------|------------------|------|-----------|-----------------|----------------|------------------|----------------|------------------|----|
| 1  | 128.1070  | 64.5571         |                |                  |                |                  | V    |           |                 |                |                  |                |                  | 13 |
| 2  | 257.1496  | 129.0784        |                |                  | 239.1390       | 120.0731         | E    | 1561.9564 | 781.4818        | 1544.9298      | 772.9685         | 1543.9458      | 772.4765         | 12 |
| 3  | 413.2758  | 207.1416        | 396.2493       | 198.6283         | 395.2653       | 198.1363         | K    | 1432.9138 | 716.9605        | 1415.8872      | 708.4472         | 1414.9032      | 707.9552         | 11 |
| 4  | 512.3443  | 256.6758        | 495.3177       | 248.1625         | 494.3337       | 247.6705         | V    | 1276.7875 | 638.8974        | 1259.7610      | 630.3841         | 1258.7769      | 629.8921         | 10 |
| 5  | 627.3712  | 314.1892        | 610.3447       | 305.6760         | 609.3606       | 305.1840         | D    | 1177.7191 | 589.3632        | 1160.6925      | 580.8499         | 1159.7085      | 580.3579         | 9  |
| 6  | 756.4138  | 378.7105        | 739.3872       | 370.1973         | 738.4032       | 369.7053         | E    | 1062.6921 | 531.8497        | 1045.6656      | 523.3364         | 1044.6816      | 522.8444         | 8  |
| 7  | 869.4979  | 435.2526        | 852.4713       | 426.7393         | 851.4873       | 426.2473         | L    | 933.6496  | 467.3284        | 916.6230       | 458.8151         |                |                  | 7  |
| 8  | 1025.6241 | 513.3157        | 1008.5976      | 504.8024         | 1007.6136      | 504.3104         | K    | 820.5655  | 410.7864        | 803.5389       | 402.2731         |                |                  | 6  |
| 9  | 1181.7504 | 591.3788        | 1164.7238      | 582.8656         | 1163.7398      | 582.3735         | K    | 664.4392  | 332.7233        | 647.4127       | 324.2100         |                |                  | 5  |
| 10 | 1337.8766 | 669.4420        | 1320.8501      | 660.9287         | 1319.8661      | 660.4367         | K    | 508.3130  | 254.6601        | 491.2864       | 246.1468         |                |                  | 4  |
| 11 | 1500.9400 | 750.9736        | 1483.9134      | 742.4604         | 1482.9294      | 741.9683         | Y    | 352.1867  | 176.5970        |                |                  |                |                  | 3  |
| 12 | 1557.9614 | 779.4844        | 1540.9349      | 770.9711         | 1539.9509      | 770.4791         | G    | 189.1234  | 95.0653         |                |                  |                |                  | 2  |
| 13 |           |                 |                |                  |                |                  | I    | 132.1019  | 66.5546         |                |                  |                |                  | 1  |

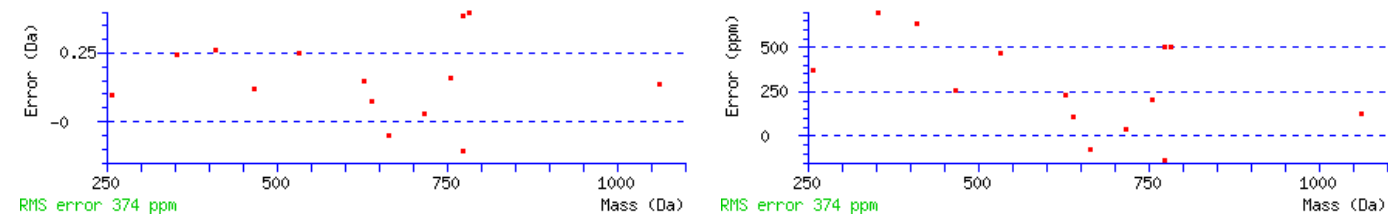

NCBI BLAST search of [VEKVDELKKKYGI](#)  
(Parameters: blastp, nr protein database, expect=20000, no filter, PAM30)  
Other BLAST [web gateways](#)

All matches to this query

| Score | Mr(calc)  | Delta  | Sequence                         |
|-------|-----------|--------|----------------------------------|
| 23.4  | 1688.0488 | 0.0051 | <a href="#">VEKVDELKKKYGI</a>    |
| 18.9  | 1687.8927 | 0.1612 | <a href="#">GERLTQCREVLLTT</a>   |
| 17.2  | 1687.8570 | 0.1969 | <a href="#">FVFPRESETDHVK</a>    |
| 16.9  | 1687.8933 | 0.1605 | <a href="#">GSELGLELVFVWNR</a>   |
| 16.4  | 1687.9422 | 0.1117 | <a href="#">TQKSYSSSETLKAY</a>   |
| 15.7  | 1687.9719 | 0.0820 | <a href="#">LSAYEQKLQTVHAS</a>   |
| 15.4  | 1687.8967 | 0.1572 | <a href="#">ALLSGREMGPTLPGY</a>  |
| 15.4  | 1687.8516 | 0.2023 | <a href="#">KSVLTAGGVSGEELDE</a> |
| 15.1  | 1688.0310 | 0.0228 | <a href="#">VELKIVGEKACKIF</a>   |
| 14.2  | 1687.7956 | 0.2582 | <a href="#">GELRTHVSRQVCM</a>    |

Mascot: <http://www.matrixscience.com/>



Mascot Search Results

Peptide View

MS/MS Fragmentation of **VEKVDELKKKYGI**  
Found in **ACBP\_MOUSE** in **SwissProt**, Acyl-CoA-binding protein OS=Mus musculus GN=Dbi PE=1 SV=2

Match to Query 6057: 1688.053872 from(563.691900,3+) intensity(158413.2800) scans(5190) rawscans(sn5190) rtinseconds(2058.7076) index(3181)  
Title: 3182: Scan 5190 (rt=2058.71) [C:\Users\Administrador\Desktop\AMOSTRAS NO ORBITRAP LEANDRO RODAR NOVAMENTE\HIPOCAMPO\hipocampo\_01.raw]  
Data file hipocampo\_01.temp.mgf

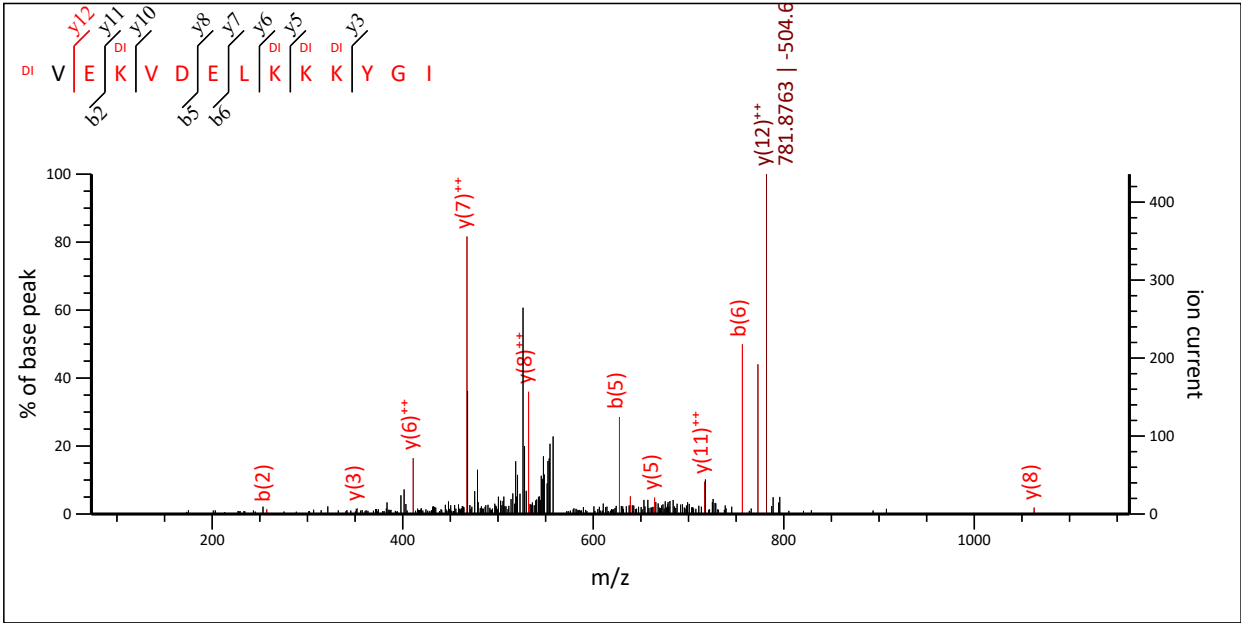

73.23 to 1162.83

Label all possible matches ☐ Label matches used for scoring ☒

Monoisotopic mass of neutral peptide Mr(calc): 1688.0488  
Variable modifications:  
N-term : Dimethyl (N-term)  
K3 : Dimethyl (K)  
K8 : Dimethyl (K)  
K9 : Dimethyl (K)  
K10 : Dimethyl (K)  
Ions Score: 23 Expect: 1.4e+002  
Matches : 14/118 fragment ions using 31 most intense peaks ([help](#))

| #  | b         | b <sup>++</sup> | b <sup>*</sup> | b <sup>+++</sup> | b <sup>0</sup> | b <sup>0++</sup> | Seq. | y         | y <sup>++</sup> | y <sup>*</sup> | y <sup>+++</sup> | y <sup>0</sup> | y <sup>0++</sup> | #  |
|----|-----------|-----------------|----------------|------------------|----------------|------------------|------|-----------|-----------------|----------------|------------------|----------------|------------------|----|
| 1  | 128.1070  | 64.5571         |                |                  |                |                  | V    |           |                 |                |                  |                |                  | 13 |
| 2  | 257.1496  | 129.0784        |                |                  | 239.1390       | 120.0731         | E    | 1561.9564 | 781.4818        | 1544.9298      | 772.9685         | 1543.9458      | 772.4765         | 12 |
| 3  | 413.2758  | 207.1416        | 396.2493       | 198.6283         | 395.2653       | 198.1363         | K    | 1432.9138 | 716.9605        | 1415.8872      | 708.4472         | 1414.9032      | 707.9552         | 11 |
| 4  | 512.3443  | 256.6758        | 495.3177       | 248.1625         | 494.3337       | 247.6705         | V    | 1276.7875 | 638.8974        | 1259.7610      | 630.3841         | 1258.7769      | 629.8921         | 10 |
| 5  | 627.3712  | 314.1892        | 610.3447       | 305.6760         | 609.3606       | 305.1840         | D    | 1177.7191 | 589.3632        | 1160.6925      | 580.8499         | 1159.7085      | 580.3579         | 9  |
| 6  | 756.4138  | 378.7105        | 739.3872       | 370.1973         | 738.4032       | 369.7053         | E    | 1062.6921 | 531.8497        | 1045.6656      | 523.3364         | 1044.6816      | 522.8444         | 8  |
| 7  | 869.4979  | 435.2526        | 852.4713       | 426.7393         | 851.4873       | 426.2473         | L    | 933.6496  | 467.3284        | 916.6230       | 458.8151         |                |                  | 7  |
| 8  | 1025.6241 | 513.3157        | 1008.5976      | 504.8024         | 1007.6136      | 504.3104         | K    | 820.5655  | 410.7864        | 803.5389       | 402.2731         |                |                  | 6  |
| 9  | 1181.7504 | 591.3788        | 1164.7238      | 582.8656         | 1163.7398      | 582.3735         | K    | 664.4392  | 332.7233        | 647.4127       | 324.2100         |                |                  | 5  |
| 10 | 1337.8766 | 669.4420        | 1320.8501      | 660.9287         | 1319.8661      | 660.4367         | K    | 508.3130  | 254.6601        | 491.2864       | 246.1468         |                |                  | 4  |
| 11 | 1500.9400 | 750.9736        | 1483.9134      | 742.4604         | 1482.9294      | 741.9683         | Y    | 352.1867  | 176.5970        |                |                  |                |                  | 3  |
| 12 | 1557.9614 | 779.4844        | 1540.9349      | 770.9711         | 1539.9509      | 770.4791         | G    | 189.1234  | 95.0653         |                |                  |                |                  | 2  |
| 13 |           |                 |                |                  |                |                  | I    | 132.1019  | 66.5546         |                |                  |                |                  | 1  |

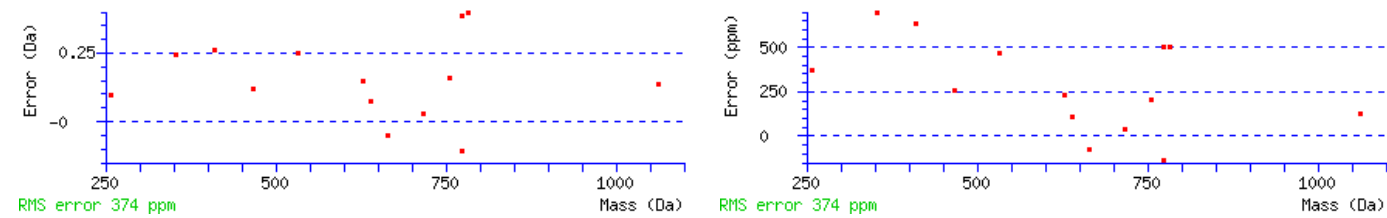

NCBI BLAST search of [VEKVDELKKKYGI](#)  
(Parameters: blastp, nr protein database, expect=20000, no filter, PAM30)  
Other BLAST [web gateways](#)

All matches to this query

| Score | Mr(calc)  | Delta  | Sequence                         |
|-------|-----------|--------|----------------------------------|
| 23.4  | 1688.0488 | 0.0051 | <a href="#">VEKVDELKKKYGI</a>    |
| 18.9  | 1687.8927 | 0.1612 | <a href="#">GERLTQCREVLLTT</a>   |
| 17.2  | 1687.8570 | 0.1969 | <a href="#">FVFPRESETDHVK</a>    |
| 16.9  | 1687.8933 | 0.1605 | <a href="#">GSELGLELVFVWNR</a>   |
| 16.4  | 1687.9422 | 0.1117 | <a href="#">TQKSYSSSETLKAY</a>   |
| 15.7  | 1687.9719 | 0.0820 | <a href="#">LSAYEQKLQTVHAS</a>   |
| 15.4  | 1687.8967 | 0.1572 | <a href="#">ALLSGREMGPTLPGY</a>  |
| 15.4  | 1687.8516 | 0.2023 | <a href="#">KSVLTAGGVSGEELDE</a> |
| 15.1  | 1688.0310 | 0.0228 | <a href="#">VELKIVGEKACKIF</a>   |
| 14.2  | 1687.7956 | 0.2582 | <a href="#">GELRTHVSRQVCM</a>    |

Mascot: <http://www.matrixscience.com/>

# Mascot Search Results

## Peptide View

MS/MS Fragmentation of **KFDDDPKFEVIDKPQS**  
Found in **ATP5J\_MOUSE** in **SwissProt**, ATP synthase-coupling factor 6, mitochondrial OS=Mus musculus GN=Atp5j PE=1 SV=1  
Match to Query 7204: 1904.038388 from(953.026470,2+) intensity(32767.4570) scans(5862) rawscans(sn5862) rtinseconds(2278.4824) index(3776)  
Title: 3777: Scan 5862 (rt=2278.48) [C:\Users\Administrador\Desktop\AMOSTRAS NO ORBITRAP LEANDRO RODAR NOVAMENTE\HIPOCAMPO\hipocampo\_01.raw]  
Data file hipocampo\_01.temp.mgf

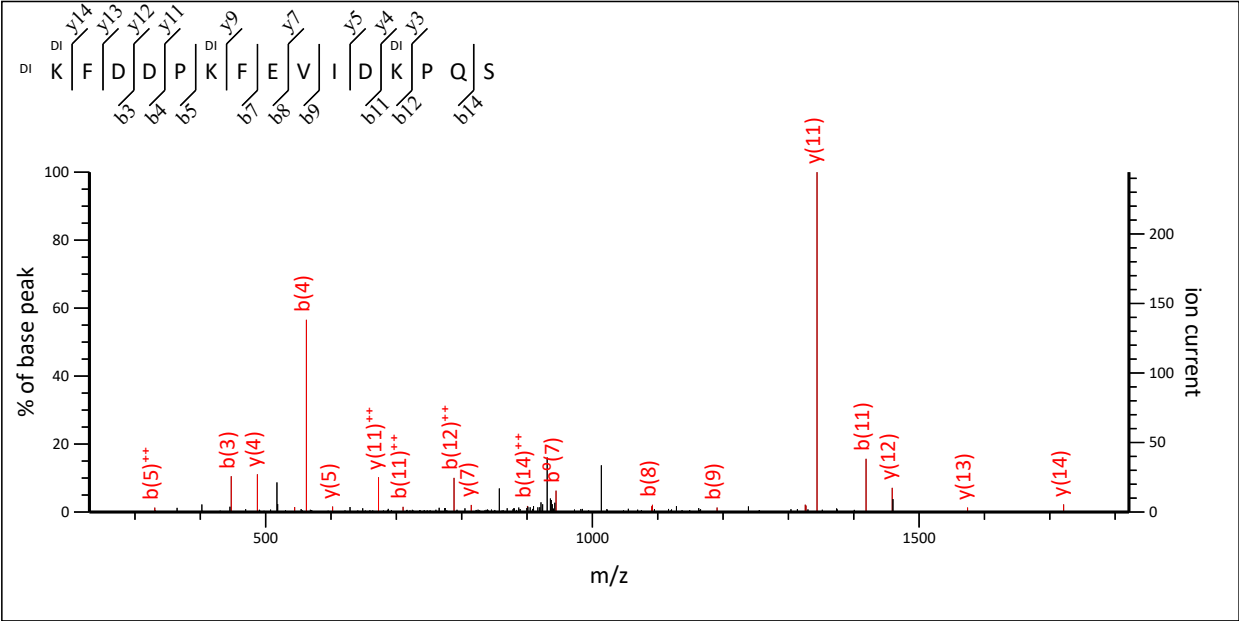



230.31 to 1821.15

Label all possible matches ☐ Label matches used for scoring ☒

Monoisotopic mass of neutral peptide Mr(calc): 1904.0295  
Variable modifications:  
N-term : Dimethyl (N-term)  
K1 : Dimethyl (K)  
K6 : Dimethyl (K)  
K12 : Dimethyl (K)  
Ions Score: 45 Expect: 1  
Matches : 23/162 fragment ions using 48 most intense peaks ([help](#))

| #  | b         | b <sup>++</sup> | b <sup>*</sup> | b <sup>+++</sup> | b <sup>0</sup> | b <sup>0++</sup> | Seq. | y         | y <sup>++</sup> | y <sup>*</sup> | y <sup>+++</sup> | y <sup>0</sup> | y <sup>0++</sup> | #  |
|----|-----------|-----------------|----------------|------------------|----------------|------------------|------|-----------|-----------------|----------------|------------------|----------------|------------------|----|
| 1  | 185.1648  | 93.0861         | 168.1383       | 84.5728          |                |                  | K    |           |                 |                |                  |                |                  | 15 |
| 2  | 332.2333  | 166.6203        | 315.2067       | 158.1070         |                |                  | F    | 1720.8792 | 860.9433        | 1703.8527      | 852.4300         | 1702.8687      | 851.9380         | 14 |
| 3  | 447.2602  | 224.1337        | 430.2336       | 215.6205         | 429.2496       | 215.1285         | D    | 1573.8108 | 787.4090        | 1556.7843      | 778.8958         | 1555.8003      | 778.4038         | 13 |
| 4  | 562.2871  | 281.6472        | 545.2606       | 273.1339         | 544.2766       | 272.6419         | D    | 1458.7839 | 729.8956        | 1441.7573      | 721.3823         | 1440.7733      | 720.8903         | 12 |
| 5  | 659.3399  | 330.1736        | 642.3134       | 321.6603         | 641.3293       | 321.1683         | P    | 1343.7569 | 672.3821        | 1326.7304      | 663.8688         | 1325.7464      | 663.3768         | 11 |
| 6  | 815.4662  | 408.2367        | 798.4396       | 399.7234         | 797.4556       | 399.2314         | K    | 1246.7042 | 623.8557        | 1229.6776      | 615.3424         | 1228.6936      | 614.8504         | 10 |
| 7  | 962.5346  | 481.7709        | 945.5080       | 473.2577         | 944.5240       | 472.7656         | F    | 1090.5779 | 545.7926        | 1073.5514      | 537.2793         | 1072.5673      | 536.7873         | 9  |
| 8  | 1091.5772 | 546.2922        | 1074.5506      | 537.7790         | 1073.5666      | 537.2869         | E    | 943.5095  | 472.2584        | 926.4829       | 463.7451         | 925.4989       | 463.2531         | 8  |
| 9  | 1190.6456 | 595.8264        | 1173.6190      | 587.3132         | 1172.6350      | 586.8211         | V    | 814.4669  | 407.7371        | 797.4403       | 399.2238         | 796.4563       | 398.7318         | 7  |
| 10 | 1303.7297 | 652.3685        | 1286.7031      | 643.8552         | 1285.7191      | 643.3632         | I    | 715.3985  | 358.2029        | 698.3719       | 349.6896         | 697.3879       | 349.1976         | 6  |
| 11 | 1418.7566 | 709.8819        | 1401.7300      | 701.3687         | 1400.7460      | 700.8767         | D    | 602.3144  | 301.6608        | 585.2879       | 293.1476         | 584.3039       | 292.6556         | 5  |
| 12 | 1574.8829 | 787.9451        | 1557.8563      | 779.4318         | 1556.8723      | 778.9398         | K    | 487.2875  | 244.1474        | 470.2609       | 235.6341         | 469.2769       | 235.1421         | 4  |
| 13 | 1671.9356 | 836.4714        | 1654.9091      | 827.9582         | 1653.9251      | 827.4662         | P    | 331.1612  | 166.0842        | 314.1347       | 157.5710         | 313.1506       | 157.0790         | 3  |
| 14 | 1799.9942 | 900.5007        | 1782.9677      | 891.9875         | 1781.9836      | 891.4955         | Q    | 234.1084  | 117.5579        | 217.0819       | 109.0446         | 216.0979       | 108.5526         | 2  |
| 15 |           |                 |                |                  |                |                  | S    | 106.0499  | 53.5286         |                |                  | 88.0393        | 44.5233          | 1  |

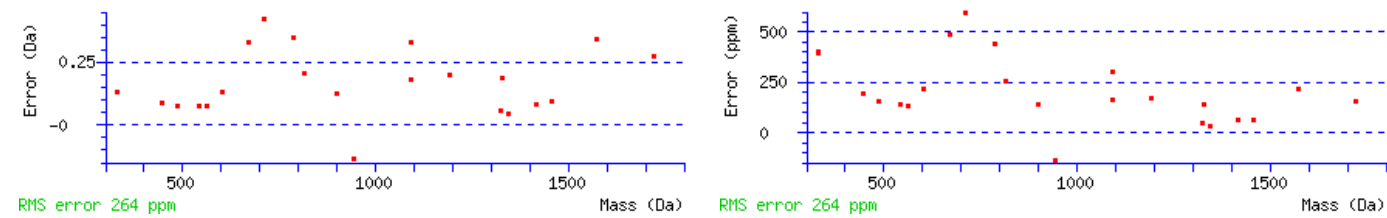

NCBI BLAST search of [KFDDPKFEVIDKPQS](#)  
(Parameters: blastp, nr protein database, expect=20000, no filter, PAM30)  
Other BLAST [web gateways](#)

All matches to this query

| Score | Mr(calc)  | Delta   | Sequence                           |
|-------|-----------|---------|------------------------------------|
| 44.9  | 1904.0295 | 0.0088  | <a href="#">KFDDPKFEVIDKPQS</a>    |
| 19.1  | 1903.9836 | 0.0548  | <a href="#">DPVSMPGSSRAVSDRRGV</a> |
| 16.5  | 1903.9877 | 0.0506  | <a href="#">THHVLIRSTWDRRR</a>     |
| 16.4  | 1903.9965 | 0.0419  | <a href="#">MKDDPITLFVALSPQGT</a>  |
| 16.2  | 1903.8736 | 0.1648  | <a href="#">NFEFDQMYPVVALVML</a>   |
| 16.1  | 1904.0903 | -0.0520 | <a href="#">MKDDPITLFVALSPQGT</a>  |
| 15.2  | 1903.9164 | 0.1220  | <a href="#">GGDFDAKQSLVGDIGDVN</a> |
| 14.2  | 1904.0458 | -0.0074 | <a href="#">ETSPPPRDELLDIARQ</a>   |
| 14.1  | 1903.8847 | 0.1537  | <a href="#">TLPEQGNATNRDHSSMT</a>  |
| 14.0  | 1904.0511 | -0.0127 | <a href="#">MFDGSVLAAYGNVIVVTL</a> |

Mascot: <http://www.matrixscience.com/>

Mascot Search Results

Peptide View

MS/MS Fragmentation of **AANSKVAFSAVRSTN**  
Found in **CBLN4\_MOUSE** in **SwissProt**, Cerebellin-4 OS=Mus musculus GN=Cbln4 PE=1 SV=1

Match to Query 5849: 1577.853468 from(789.934010,2+) intensity(26784.0980) scans(3621) rawscans(sn3621) rtinseconds(1555.4991) index(1881)  
Title: 1882: Scan 3621 (rt=1555.5) [C:\Users\Administrador\Desktop\AMOSTRAS NO ORBITRAP LEANDRO RODAR NOVAMENTE\CORTEX\cortex\_01.raw]  
Data file cortex\_01.temp.mgf

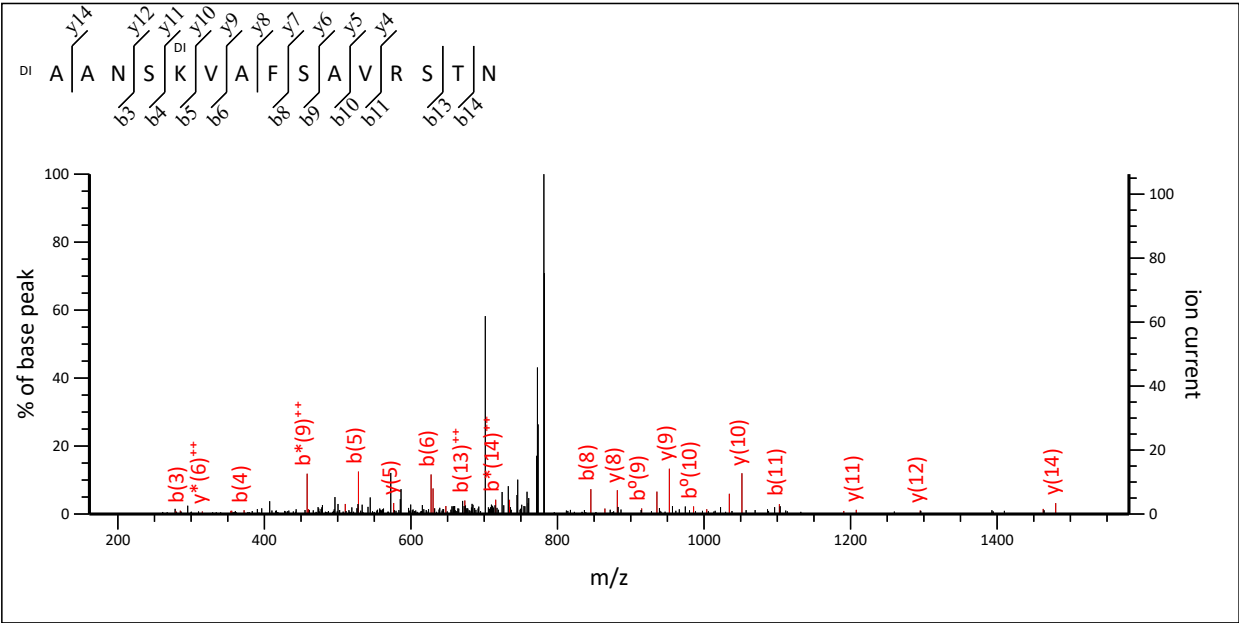

Navigation icons: ? (help), zoom in, zoom out, zoom reset, pan, and a range selector showing 161.21 to 1579.93.

Label all possible matches ☐ Label matches used for scoring ☒

Monoisotopic mass of neutral peptide Mr(calc): 1577.8525  
Variable modifications:  
N-term : Dimethyl (N-term)  
K5 : Dimethyl (K)  
Ions Score: 28 Expect: 50  
Matches : 36/156 fragment ions using 100 most intense peaks ([help](#))

| #  | b         | b <sup>++</sup> | b <sup>*</sup> | b <sup>+++</sup> | b <sup>0</sup> | b <sup>0++</sup> | Seq. | y         | y <sup>++</sup> | y <sup>*</sup> | y <sup>+++</sup> | y <sup>0</sup> | y <sup>0++</sup> | #  |
|----|-----------|-----------------|----------------|------------------|----------------|------------------|------|-----------|-----------------|----------------|------------------|----------------|------------------|----|
| 1  | 100.0757  | 50.5415         |                |                  |                |                  | A    |           |                 |                |                  |                |                  | 15 |
| 2  | 171.1128  | 86.0600         |                |                  |                |                  | A    | 1479.7914 | 740.3993        | 1462.7649      | 731.8861         | 1461.7809      | 731.3941         | 14 |
| 3  | 285.1557  | 143.0815        | 268.1292       | 134.5682         |                |                  | N    | 1408.7543 | 704.8808        | 1391.7278      | 696.3675         | 1390.7437      | 695.8755         | 13 |
| 4  | 372.1878  | 186.5975        | 355.1612       | 178.0842         | 354.1772       | 177.5922         | S    | 1294.7114 | 647.8593        | 1277.6848      | 639.3461         | 1276.7008      | 638.8540         | 12 |
| 5  | 528.3140  | 264.6606        | 511.2875       | 256.1474         | 510.3035       | 255.6554         | K    | 1207.6793 | 604.3433        | 1190.6528      | 595.8300         | 1189.6688      | 595.3380         | 11 |
| 6  | 627.3824  | 314.1949        | 610.3559       | 305.6816         | 609.3719       | 305.1896         | V    | 1051.5531 | 526.2802        | 1034.5265      | 517.7669         | 1033.5425      | 517.2749         | 10 |
| 7  | 698.4195  | 349.7134        | 681.3930       | 341.2001         | 680.4090       | 340.7081         | A    | 952.4847  | 476.7460        | 935.4581       | 468.2327         | 934.4741       | 467.7407         | 9  |
| 8  | 845.4880  | 423.2476        | 828.4614       | 414.7343         | 827.4774       | 414.2423         | F    | 881.4476  | 441.2274        | 864.4210       | 432.7141         | 863.4370       | 432.2221         | 8  |
| 9  | 932.5200  | 466.7636        | 915.4934       | 458.2504         | 914.5094       | 457.7584         | S    | 734.3791  | 367.6932        | 717.3526       | 359.1799         | 716.3686       | 358.6879         | 7  |
| 10 | 1003.5571 | 502.2822        | 986.5306       | 493.7689         | 985.5465       | 493.2769         | A    | 647.3471  | 324.1772        | 630.3206       | 315.6639         | 629.3365       | 315.1719         | 6  |
| 11 | 1102.6255 | 551.8164        | 1085.5990      | 543.3031         | 1084.6150      | 542.8111         | V    | 576.3100  | 288.6586        | 559.2835       | 280.1454         | 558.2994       | 279.6534         | 5  |
| 12 | 1258.7266 | 629.8670        | 1241.7001      | 621.3537         | 1240.7161      | 620.8617         | R    | 477.2416  | 239.1244        | 460.2150       | 230.6112         | 459.2310       | 230.1191         | 4  |
| 13 | 1345.7587 | 673.3830        | 1328.7321      | 664.8697         | 1327.7481      | 664.3777         | S    | 321.1405  | 161.0739        | 304.1139       | 152.5606         | 303.1299       | 152.0686         | 3  |
| 14 | 1446.8063 | 723.9068        | 1429.7798      | 715.3935         | 1428.7958      | 714.9015         | T    | 234.1084  | 117.5579        | 217.0819       | 109.0446         | 216.0979       | 108.5526         | 2  |
| 15 |           |                 |                |                  |                |                  | N    | 133.0608  | 67.0340         | 116.0342       | 58.5207          |                |                  | 1  |

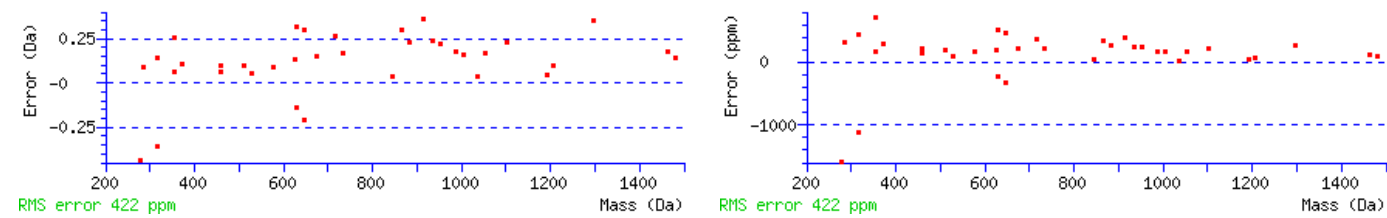

NCBI BLAST search of [AANSKVAFSAVRSTN](#)  
(Parameters: blastp, nr protein database, expect=20000, no filter, PAM30)  
Other BLAST [web gateways](#)

All matches to this query

| Score | Mr(calc)  | Delta   | Sequence                        |
|-------|-----------|---------|---------------------------------|
| 27.9  | 1577.8525 | 0.0009  | <a href="#">AANSKVAFSAVRSTN</a> |
| 17.5  | 1577.8314 | 0.0220  | <a href="#">VTTRVWNRTEAAS</a>   |
| 16.4  | 1577.7435 | 0.1099  | <a href="#">ASLYVAMNGEGYLY</a>  |
| 14.5  | 1577.7825 | 0.0710  | <a href="#">VDEGGVFESLKAET</a>  |
| 13.9  | 1577.9323 | -0.0788 | <a href="#">GRHVAVLPEIDPV</a>   |
| 13.6  | 1577.9273 | -0.0738 | <a href="#">LISIKANCIDSTASA</a> |
| 13.5  | 1577.9365 | -0.0830 | <a href="#">ASREHLKRSLALAA</a>  |
| 13.4  | 1577.8049 | 0.0486  | <a href="#">EDVPSQPPENVRAL</a>  |
| 13.0  | 1577.9029 | -0.0494 | <a href="#">KVEDVVETLLQLH</a>   |
| 12.9  | 1577.8161 | 0.0373  | <a href="#">LTENPQVAQRANAP</a>  |

Mascot: <http://www.matrixscience.com/>

# Mascot Search Results

## Peptide View

MS/MS Fragmentation of **SKVAFSAVRSTN**  
Found in **CBLN4\_MOUSE** in **SwissProt**, Cerebellin-4 OS=Mus musculus GN=Cbln4 PE=1 SV=1

Match to Query 3962: 1321.739472 from(441.587100,3+) intensity(89601.6020) scans(3471) rawscans(sn3471) rtinseconds(1502.291) index(1720)  
Title: 1721: Scan 3471 (rt=1502.29) [C:\Users\Administrador\Desktop\AMOSTRAS NO ORBITRAP LEANDRO RODAR NOVAMENTE\HIPOCAMPO\hipocampo\_01.raw]  
Data file hipocampo\_01.temp.mgf

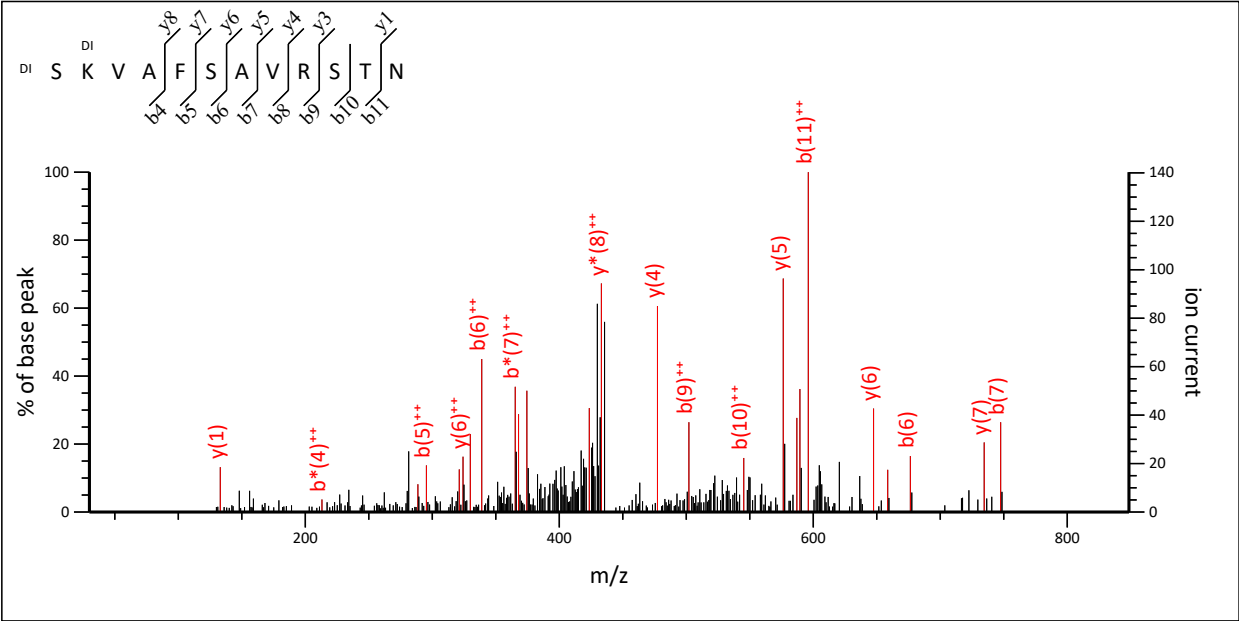

Navigation icons: ? (help), zoom in, zoom out, zoom reset, 30.01 to 848.6 (mass range), zoom in, zoom out, zoom reset.

Label all possible matches ☐ Label matches used for scoring ☒

Monoisotopic mass of neutral peptide Mr(calc): 1321.7354  
Variable modifications:  
N-term : Dimethyl (N-term)  
K2 : Dimethyl (K)  
Ions Score: 44 Expect: 1.3  
Matches : 31/128 fragment ions using 41 most intense peaks ([help](#))

| #  | b         | b <sup>++</sup> | b <sup>*</sup> | b <sup>+++</sup> | b <sup>0</sup> | b <sup>0++</sup> | Seq. | y         | y <sup>++</sup> | y <sup>*</sup> | y <sup>+++</sup> | y <sup>0</sup> | y <sup>0++</sup> | #  |
|----|-----------|-----------------|----------------|------------------|----------------|------------------|------|-----------|-----------------|----------------|------------------|----------------|------------------|----|
| 1  | 116.0706  | 58.5389         |                |                  | 98.0600        | 49.5337          | S    |           |                 |                |                  |                |                  | 12 |
| 2  | 272.1969  | 136.6021        | 255.1703       | 128.0888         | 254.1863       | 127.5968         | K    | 1207.6793 | 604.3433        | 1190.6528      | 595.8300         | 1189.6688      | 595.3380         | 11 |
| 3  | 371.2653  | 186.1363        | 354.2387       | 177.6230         | 353.2547       | 177.1310         | V    | 1051.5531 | 526.2802        | 1034.5265      | 517.7669         | 1033.5425      | 517.2749         | 10 |
| 4  | 442.3024  | 221.6548        | 425.2758       | 213.1416         | 424.2918       | 212.6496         | A    | 952.4847  | 476.7460        | 935.4581       | 468.2327         | 934.4741       | 467.7407         | 9  |
| 5  | 589.3708  | 295.1890        | 572.3443       | 286.6758         | 571.3602       | 286.1838         | F    | 881.4476  | 441.2274        | 864.4210       | 432.7141         | 863.4370       | 432.2221         | 8  |
| 6  | 676.4028  | 338.7051        | 659.3763       | 330.1918         | 658.3923       | 329.6998         | S    | 734.3791  | 367.6932        | 717.3526       | 359.1799         | 716.3686       | 358.6879         | 7  |
| 7  | 747.4400  | 374.2236        | 730.4134       | 365.7103         | 729.4294       | 365.2183         | A    | 647.3471  | 324.1772        | 630.3206       | 315.6639         | 629.3365       | 315.1719         | 6  |
| 8  | 846.5084  | 423.7578        | 829.4818       | 415.2445         | 828.4978       | 414.7525         | V    | 576.3100  | 288.6586        | 559.2835       | 280.1454         | 558.2994       | 279.6534         | 5  |
| 9  | 1002.6095 | 501.8084        | 985.5829       | 493.2951         | 984.5989       | 492.8031         | R    | 477.2416  | 239.1244        | 460.2150       | 230.6112         | 459.2310       | 230.1191         | 4  |
| 10 | 1089.6415 | 545.3244        | 1072.6150      | 536.8111         | 1071.6309      | 536.3191         | S    | 321.1405  | 161.0739        | 304.1139       | 152.5606         | 303.1299       | 152.0686         | 3  |
| 11 | 1190.6892 | 595.8482        | 1173.6626      | 587.3350         | 1172.6786      | 586.8429         | T    | 234.1084  | 117.5579        | 217.0819       | 109.0446         | 216.0979       | 108.5526         | 2  |
| 12 |           |                 |                |                  |                |                  | N    | 133.0608  | 67.0340         | 116.0342       | 58.5207          |                |                  | 1  |

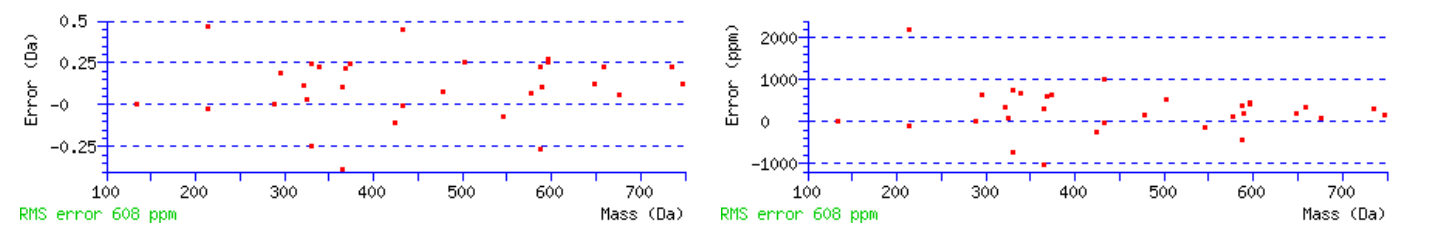

NCBI BLAST search of [SKVAFSAVRSTN](#)  
(Parameters: blastp, nr protein database, expect=20000, no filter, PAM30)  
Other BLAST [web gateways](#)

All matches to this query

| Score | Mr(calc)  | Delta   | Sequence                       |
|-------|-----------|---------|--------------------------------|
| 43.7  | 1321.7354 | 0.0041  | <a href="#">SKVAFSAVRSTN</a>   |
| 32.1  | 1321.6700 | 0.0695  | <a href="#">RQESSALIDCL</a>    |
| 28.0  | 1321.6849 | 0.0545  | <a href="#">CQAALGASEASGLL</a> |
| 25.8  | 1321.6048 | 0.1347  | <a href="#">REDENASAADV N</a>  |
| 25.6  | 1321.6664 | 0.0731  | <a href="#">VETTATGQQVTN</a>   |
| 25.6  | 1321.7486 | -0.0091 | <a href="#">GVTMKG TQDNSL</a>  |
| 25.4  | 1321.6486 | 0.0909  | <a href="#">GLLSMANSGPSTN</a>  |
| 24.3  | 1321.7242 | 0.0153  | <a href="#">FVTL SATNAKTN</a>  |
| 23.9  | 1321.7153 | 0.0242  | <a href="#">QSSQLANHIRH</a>    |
| 23.2  | 1321.7704 | -0.0309 | <a href="#">KDPYTGEQISL</a>    |

Mascot: <http://www.matrixscience.com/>



## Mascot Search Results

### Peptide View

MS/MS Fragmentation of **ASKGLGSDLDSSLASL**

Found in **AP180 MOUSE** in **SwissProt**, Clathrin coat assembly protein AP180 OS=Mus musculus GN=Snap91 PE=1 SV=1

Match to Query 5405: 1575.841268 from(788.927910,2+) intensity(73989.8200) scans(9747) rawscans(sn9747) rtinseconds(3652.6788) index(7038)

Title: 7039: Scan 9747 (rt=3652.68) [C:\Users\Administrador\Desktop\AMOSTRAS NO ORBITRAP LEANDRO RODAR

NOVAMENTE\HIPOCAMPO\hipocampo 01.raw

Data file hipocampo 01.temp.mgf

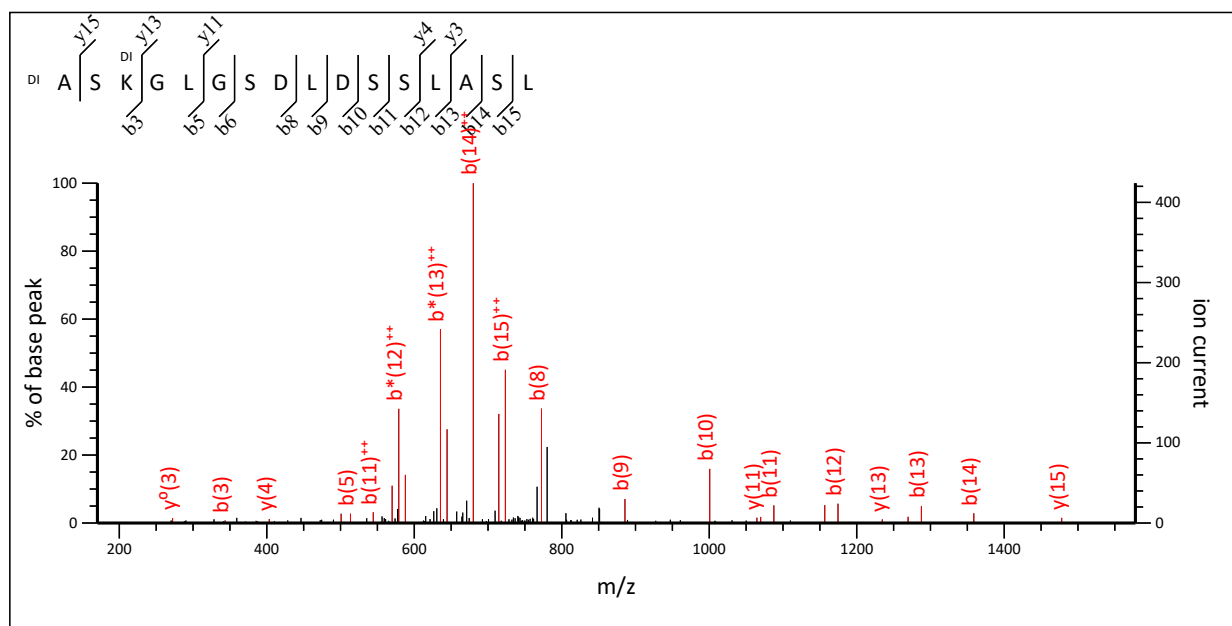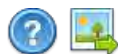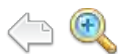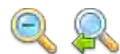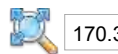

|        |    |         |
|--------|----|---------|
| 170.33 | to | 1577.92 |
|--------|----|---------|

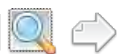

Label all possible matches ☐ Label matches used for scoring ☒

**Monoisotopic mass of neutral peptide Mr(calc): 1575.8356**

Variable modifications:

**N-term** : Dimethyl (N-term)

K3 : Dimethyl (K)  
Ions Score: 77 Expect: 0.00063

Matches : 32/146 fragment ions using 41 most intense peaks ([help](#))

| #  | <b>b</b>  | <b>b<sup>++</sup></b> | <b>b<sup>*</sup></b> | <b>b<sup>***</sup></b> | <b>b<sup>0</sup></b> | <b>b<sup>0++</sup></b> | Seq. | y         | y <sup>++</sup> | y <sup>*</sup> | y <sup>***</sup> | y <sup>0</sup> | y <sup>0++</sup> | #  |
|----|-----------|-----------------------|----------------------|------------------------|----------------------|------------------------|------|-----------|-----------------|----------------|------------------|----------------|------------------|----|
| 1  | 100.0757  | 50.5415               |                      |                        |                      |                        | A    |           |                 |                |                  |                |                  | 16 |
| 2  | 187.1077  | 94.0575               |                      |                        | 169.0972             | 85.0522                | S    | 1477.7744 | 739.3909        | 1460.7479      | 730.8776         | 1459.7639      | 730.3856         | 15 |
| 3  | 343.2340  | 172.1206              | 326.2074             | 163.6074               | 325.2234             | 163.1153               | K    | 1390.7424 | 695.8748        | 1373.7159      | 687.3616         | 1372.7318      | 686.8696         | 14 |
| 4  | 400.2554  | 200.6314              | 383.2289             | 192.1181               | 382.2449             | 191.6261               | G    | 1234.6161 | 617.8117        |                |                  | 1216.6056      | 608.8064         | 13 |
| 5  | 513.3395  | 257.1734              | 496.3130             | 248.6601               | 495.3289             | 248.1681               | L    | 1177.5947 | 589.3010        |                |                  | 1159.5841      | 580.2957         | 12 |
| 6  | 570.3610  | 285.6841              | 553.3344             | 277.1709               | 552.3504             | 276.6788               | G    | 1064.5106 | 532.7589        |                |                  | 1046.5000      | 523.7537         | 11 |
| 7  | 657.3930  | 329.2001              | 640.3665             | 320.6869               | 639.3824             | 320.1949               | S    | 1007.4891 | 504.2482        |                |                  | 989.4786       | 495.2429         | 10 |
| 8  | 772.4199  | 386.7136              | 755.3934             | 378.2003               | 754.4094             | 377.7083               | D    | 920.4571  | 460.7322        |                |                  | 902.4466       | 451.7269         | 9  |
| 9  | 885.5040  | 443.2556              | 868.4775             | 434.7424               | 867.4934             | 434.2504               | L    | 805.4302  | 403.2187        |                |                  | 787.4196       | 394.2134         | 8  |
| 10 | 1000.5310 | 500.7691              | 983.5044             | 492.2558               | 982.5204             | 491.7638               | D    | 692.3461  | 346.6767        |                |                  | 674.3355       | 337.6714         | 7  |
| 11 | 1087.5630 | 544.2851              | 1070.5364            | 535.7719               | 1069.5524            | 535.2798               | S    | 577.3192  | 289.1632        |                |                  | 559.3086       | 280.1579         | 6  |
| 12 | 1174.5950 | 587.8011              | 1157.5685            | 579.2879               | 1156.5844            | 578.7959               | S    | 490.2871  | 245.6472        |                |                  | 472.2766       | 236.6419         | 5  |
| 13 | 1287.6791 | 644.3432              | 1270.6525            | 635.8299               | 1269.6685            | 635.3379               | L    | 403.2551  | 202.1312        |                |                  | 385.2445       | 193.1259         | 4  |
| 14 | 1358.7162 | 679.8617              | 1341.6896            | 671.3485               | 1340.7056            | 670.8564               | A    | 290.1710  | 145.5892        |                |                  | 272.1605       | 136.5839         | 3  |
| 15 | 1445.7482 | 723.3777              | 1428.7217            | 714.8645               | 1427.7376            | 714.3725               | S    | 219.1339  | 110.0706        |                |                  | 201.1234       | 101.0653         | 2  |
| 16 |           |                       |                      |                        |                      |                        | L    | 132.1019  | 66.5546         |                |                  |                |                  | 1  |

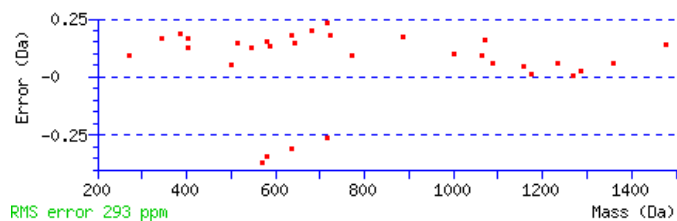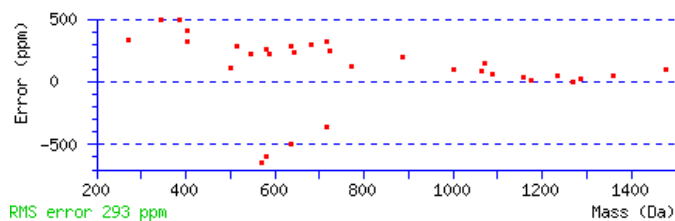

NCBI **BLAST** search of [ASKGLGSDLDSSLASL](#)

(Parameters: blastp, nr protein database, expect=20000, no filter, PAM30)

Other BLAST [web gateways](#)

#### All matches to this query

| Score | Mr(calc)  | Delta   | Sequence                         |
|-------|-----------|---------|----------------------------------|
| 76.9  | 1575.8356 | 0.0057  | <a href="#">ASKGLGSDLDSSLASL</a> |
| 33.2  | 1575.8615 | -0.0203 | <a href="#">LAVMLAALMSSLASI</a>  |
| 31.9  | 1575.7613 | 0.0800  | <a href="#">AHRMDSLDSRDSI</a>    |
| 29.7  | 1575.8615 | -0.0203 | <a href="#">LAVMLAALMSSLASI</a>  |
| 28.0  | 1575.9021 | -0.0609 | <a href="#">VSALSSAGGTENLILL</a> |
| 27.7  | 1575.9323 | -0.0911 | <a href="#">SVALSPTPTKSTPNI</a>  |
| 27.2  | 1575.7330 | 0.1083  | <a href="#">AGSLGPWGPMSSGPW</a>  |
| 26.7  | 1575.7450 | 0.0962  | <a href="#">NMLSSDVAQLSDPGV</a>  |
| 25.8  | 1576.1168 | -0.2755 | <a href="#">KPISVESSSKKVK</a>    |
| 25.8  | 1575.9134 | -0.0721 | <a href="#">LPLVSGRSASSSLASL</a> |

Mascot: <http://www.matrixscience.com/>

Mascot Search Results

Peptide View

MS/MS Fragmentation of **KGLGSDLSSLASL**  
Found in **AP180\_MOUSE** in **SwissProt**, Clathrin coat assembly protein AP180 OS=Mus musculus GN=Snap91 PE=1 SV=1

Match to Query 4749: 1417.773008 from(709.893780,2+) intensity(33636.4020) scans(9499) rawscans(sn9499)  
rtinseconds(3590.1007) index(6933)  
Title: 6934: Scan 9499 (rt=3590.1) [C:\Users\Administrador\Desktop\AMOSTRAS NO ORBITRAP LEANDRO RODAR  
NOVAMENTE\CORTEX\cortex\_01.raw]  
Data file cortex\_01.temp.mgf

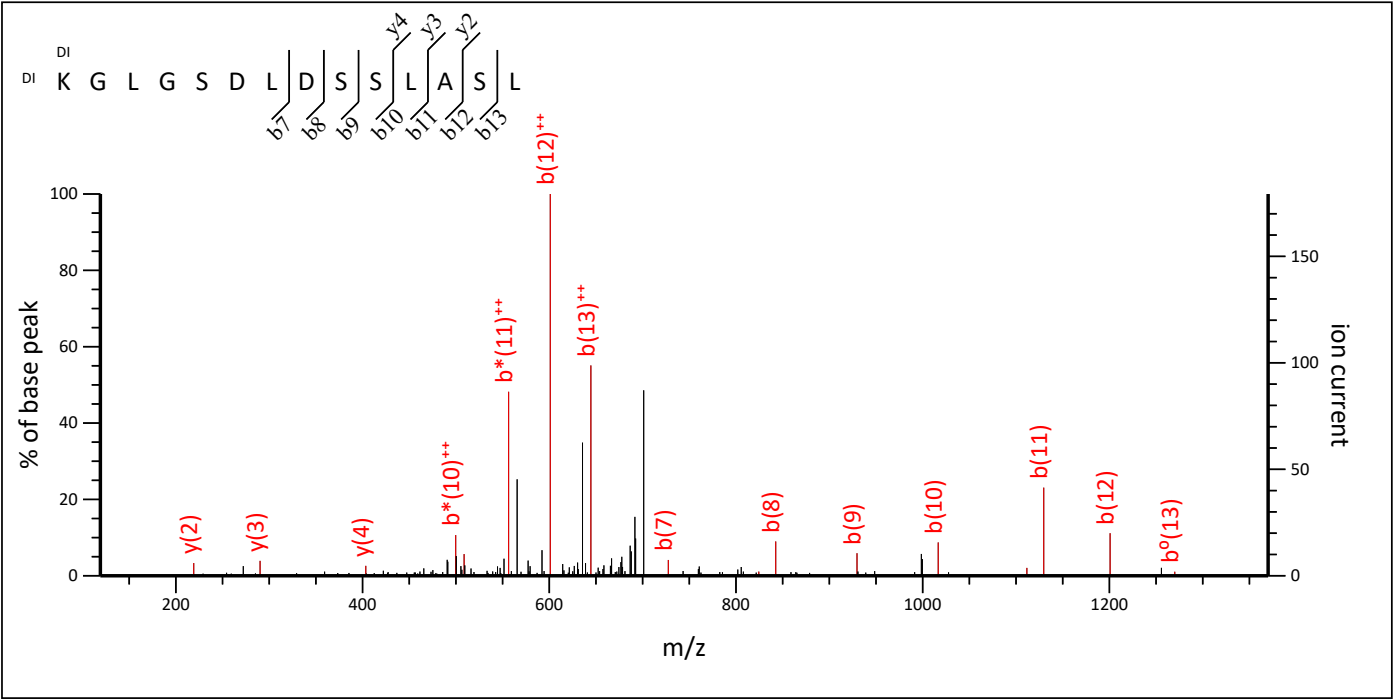

119.14 to 1370.03

Label all possible matches ☐ Label matches used for scoring ☒

Monoisotopic mass of neutral peptide Mr(calc): 1417.7664  
Variable modifications:  
N-term : Dimethyl (N-term)  
K1 : Dimethyl (K)  
Ions Score: 57 Expect: 0.065  
Matches : 21/120 fragment ions using 22 most intense peaks ([help](#))

| #  | b         | b <sup>++</sup> | b <sup>*</sup> | b <sup>*++</sup> | b <sup>0</sup> | b <sup>0++</sup> | Seq. | y         | y <sup>++</sup> | y <sup>*++</sup> | y <sup>0</sup> | y <sup>0++</sup> | #  |
|----|-----------|-----------------|----------------|------------------|----------------|------------------|------|-----------|-----------------|------------------|----------------|------------------|----|
| 1  | 185.1648  | 93.0861         | 168.1383       | 84.5728          |                |                  | K    |           |                 |                  |                |                  | 14 |
| 2  | 242.1863  | 121.5968        | 225.1598       | 113.0835         |                |                  | G    | 1234.6161 | 617.8117        |                  | 1216.6056      | 608.8064         | 13 |
| 3  | 355.2704  | 178.1388        | 338.2438       | 169.6255         |                |                  | L    | 1177.5947 | 589.3010        |                  | 1159.5841      | 580.2957         | 12 |
| 4  | 412.2918  | 206.6496        | 395.2653       | 198.1363         |                |                  | G    | 1064.5106 | 532.7589        |                  | 1046.5000      | 523.7537         | 11 |
| 5  | 499.3239  | 250.1656        | 482.2973       | 241.6523         | 481.3133       | 241.1603         | S    | 1007.4891 | 504.2482        |                  | 989.4786       | 495.2429         | 10 |
| 6  | 614.3508  | 307.6790        | 597.3243       | 299.1658         | 596.3402       | 298.6738         | D    | 920.4571  | 460.7322        |                  | 902.4466       | 451.7269         | 9  |
| 7  | 727.4349  | 364.2211        | 710.4083       | 355.7078         | 709.4243       | 355.2158         | L    | 805.4302  | 403.2187        |                  | 787.4196       | 394.2134         | 8  |
| 8  | 842.4618  | 421.7345        | 825.4353       | 413.2213         | 824.4512       | 412.7293         | D    | 692.3461  | 346.6767        |                  | 674.3355       | 337.6714         | 7  |
| 9  | 929.4938  | 465.2506        | 912.4673       | 456.7373         | 911.4833       | 456.2453         | S    | 577.3192  | 289.1632        |                  | 559.3086       | 280.1579         | 6  |
| 10 | 1016.5259 | 508.7666        | 999.4993       | 500.2533         | 998.5153       | 499.7613         | S    | 490.2871  | 245.6472        |                  | 472.2766       | 236.6419         | 5  |
| 11 | 1129.6099 | 565.3086        | 1112.5834      | 556.7953         | 1111.5994      | 556.3033         | L    | 403.2551  | 202.1312        |                  | 385.2445       | 193.1259         | 4  |
| 12 | 1200.6470 | 600.8272        | 1183.6205      | 592.3139         | 1182.6365      | 591.8219         | A    | 290.1710  | 145.5892        |                  | 272.1605       | 136.5839         | 3  |

|    |           |          |           |          |           |          |   |          |          |  |          |          |   |
|----|-----------|----------|-----------|----------|-----------|----------|---|----------|----------|--|----------|----------|---|
| 13 | 1287.6791 | 644.3432 | 1270.6525 | 635.8299 | 1269.6685 | 635.3379 | S | 219.1339 | 110.0706 |  | 201.1234 | 101.0653 | 2 |
| 14 |           |          |           |          |           |          | L | 132.1019 | 66.5546  |  |          |          | 1 |

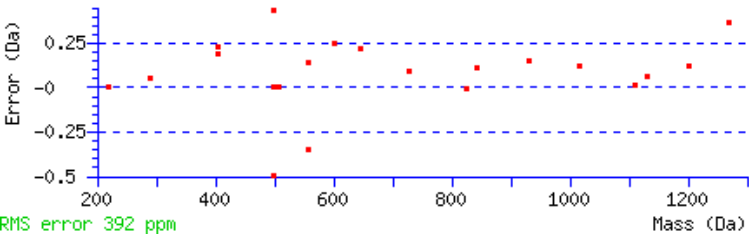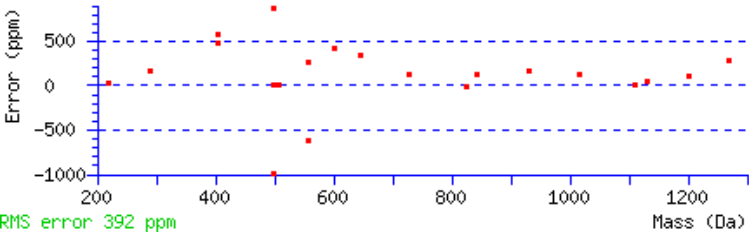

NCBI **BLAST** search of [KGLGSDLDSSLASL](#)  
(Parameters: blastp, nr protein database, expect=20000, no filter, PAM30)  
Other BLAST [web gateways](#)

All matches to this query

| Score | Mr(calc)  | Delta   | Sequence                       |
|-------|-----------|---------|--------------------------------|
| 56.7  | 1417.7664 | 0.0066  | <a href="#">KGLGSDLDSSLASL</a> |
| 46.6  | 1417.7010 | 0.0720  | <a href="#">MSLPDLSSLASI</a>   |
| 40.7  | 1417.7706 | 0.0024  | <a href="#">VNHADSRASLASL</a>  |
| 36.8  | 1417.6962 | 0.0768  | <a href="#">WALPGGSREPGEM</a>  |
| 36.1  | 1417.7920 | -0.0190 | <a href="#">LMDPVDGPILASL</a>  |
| 36.0  | 1417.7463 | 0.0267  | <a href="#">GQRHETTSSIASL</a>  |
| 35.8  | 1417.8788 | -0.1058 | <a href="#">AKLQMTEAALALS</a>  |
| 35.4  | 1417.7061 | 0.0670  | <a href="#">AEHMSDLSALASI</a>  |
| 35.2  | 1417.8079 | -0.0349 | <a href="#">GEALLDSGVRVTAV</a> |
| 34.0  | 1417.7238 | 0.0492  | <a href="#">GSAISPDLLVDSNG</a> |

Mascot: <http://www.matrixscience.com/>

Mascot Search Results

Peptide View

MS/MS Fragmentation of **SKGLGSDLSSLASL**  
Found in **AP180\_MOUSE** in **SwissProt**, Clathrin coat assembly protein AP180 OS=Mus musculus GN=Snap91 PE=1 SV=1  
Match to Query 5450: 1512.856708 from(757.435630,2+) intensity(167512.9800) scans(9658) rawscans(sn9658) rtinseconds(3646.6755) index(7067)  
Title: 7068: Scan 9658 (rt=3646.68) [C:\Users\Administrador\Desktop\AMOSTRAS NO ORBITRAP LEANDRO RODAR NOVAMENTE\CORTEX\cortex\_01.raw]  
Data file cortex\_01.temp.mgf

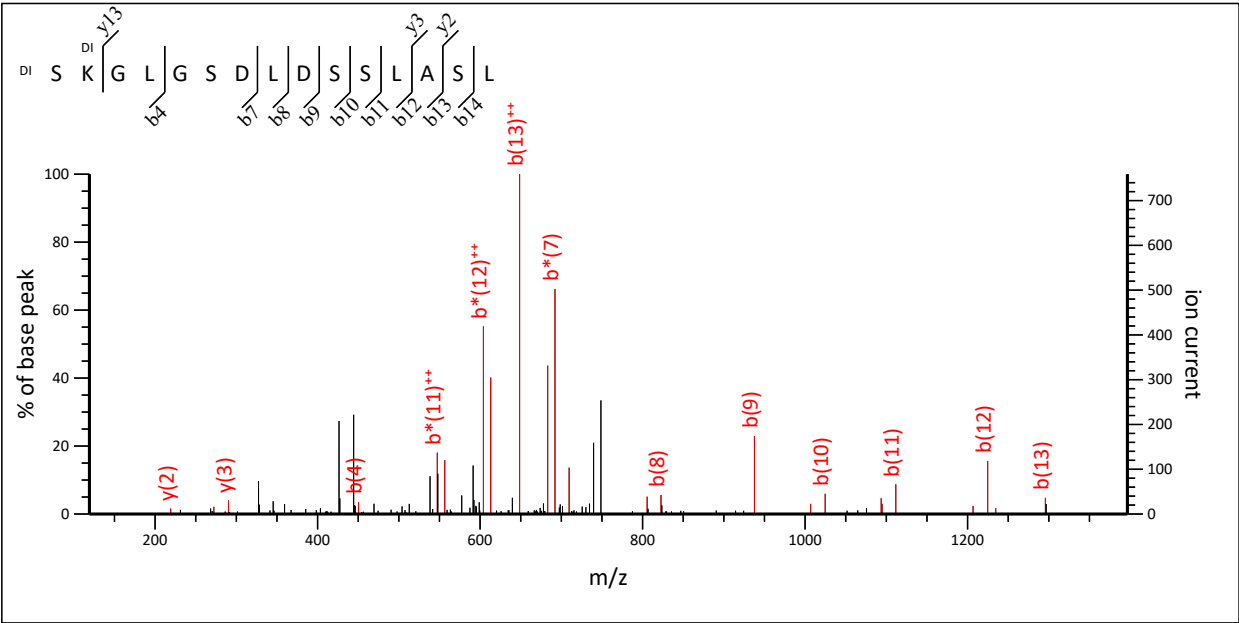

Navigation icons: ? (help), image (download), left arrow, zoom in, zoom out, zoom reset, 119.17 to 1396.72 (mass range), zoom in, right arrow.

Label all possible matches ☐ Label matches used for scoring ☒

Monoisotopic mass of neutral peptide Mr(calc): 1512.8487  
Variable modifications:  
N-term : Dimethyl:2H(4) (N-term)  
K2 : Dimethyl:2H(4) (K)  
Ions Score: 51 Expect: 0.25  
Matches : 30/138 fragment ions using 40 most intense peaks ([help](#))

| #  | b         | b <sup>++</sup> | b <sup>*</sup> | b <sup>+++</sup> | b <sup>0</sup> | b <sup>0++</sup> | Seq. | y         | y <sup>++</sup> | y <sup>*</sup> | y <sup>+++</sup> | y <sup>0</sup> | y <sup>0++</sup> | #  |
|----|-----------|-----------------|----------------|------------------|----------------|------------------|------|-----------|-----------------|----------------|------------------|----------------|------------------|----|
| 1  | 120.0957  | 60.5515         |                |                  | 102.0851       | 51.5462          | S    |           |                 |                |                  |                |                  | 15 |
| 2  | 280.2471  | 140.6272        | 263.2205       | 132.1139         | 262.2365       | 131.6219         | K    | 1394.7675 | 697.8874        | 1377.7410      | 689.3741         | 1376.7569      | 688.8821         | 14 |
| 3  | 337.2685  | 169.1379        | 320.2420       | 160.6246         | 319.2580       | 160.1326         | G    | 1234.6161 | 617.8117        |                |                  | 1216.6056      | 608.8064         | 13 |
| 4  | 450.3526  | 225.6799        | 433.3261       | 217.1667         | 432.3420       | 216.6747         | L    | 1177.5947 | 589.3010        |                |                  | 1159.5841      | 580.2957         | 12 |
| 5  | 507.3741  | 254.1907        | 490.3475       | 245.6774         | 489.3635       | 245.1854         | G    | 1064.5106 | 532.7589        |                |                  | 1046.5000      | 523.7537         | 11 |
| 6  | 594.4061  | 297.7067        | 577.3796       | 289.1934         | 576.3955       | 288.7014         | S    | 1007.4891 | 504.2482        |                |                  | 989.4786       | 495.2429         | 10 |
| 7  | 709.4330  | 355.2202        | 692.4065       | 346.7069         | 691.4225       | 346.2149         | D    | 920.4571  | 460.7322        |                |                  | 902.4466       | 451.7269         | 9  |
| 8  | 822.5171  | 411.7622        | 805.4906       | 403.2489         | 804.5065       | 402.7569         | L    | 805.4302  | 403.2187        |                |                  | 787.4196       | 394.2134         | 8  |
| 9  | 937.5441  | 469.2757        | 920.5175       | 460.7624         | 919.5335       | 460.2704         | D    | 692.3461  | 346.6767        |                |                  | 674.3355       | 337.6714         | 7  |
| 10 | 1024.5761 | 512.7917        | 1007.5495      | 504.2784         | 1006.5655      | 503.7864         | S    | 577.3192  | 289.1632        |                |                  | 559.3086       | 280.1579         | 6  |
| 11 | 1111.6081 | 556.3077        | 1094.5816      | 547.7944         | 1093.5975      | 547.3024         | S    | 490.2871  | 245.6472        |                |                  | 472.2766       | 236.6419         | 5  |
| 12 | 1224.6922 | 612.8497        | 1207.6656      | 604.3364         | 1206.6816      | 603.8444         | L    | 403.2551  | 202.1312        |                |                  | 385.2445       | 193.1259         | 4  |
| 13 | 1295.7293 | 648.3683        | 1278.7027      | 639.8550         | 1277.7187      | 639.3630         | A    | 290.1710  | 145.5892        |                |                  | 272.1605       | 136.5839         | 3  |
| 14 | 1382.7613 | 691.8843        | 1365.7348      | 683.3710         | 1364.7507      | 682.8790         | S    | 219.1339  | 110.0706        |                |                  | 201.1234       | 101.0653         | 2  |
| 15 |           |                 |                |                  |                |                  | L    | 132.1019  | 66.5546         |                |                  |                |                  | 1  |

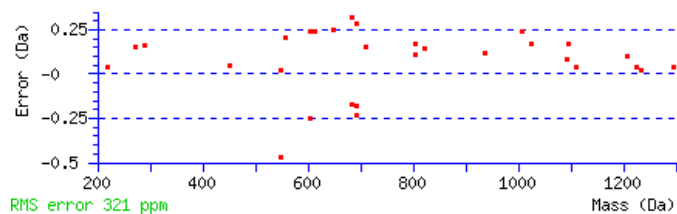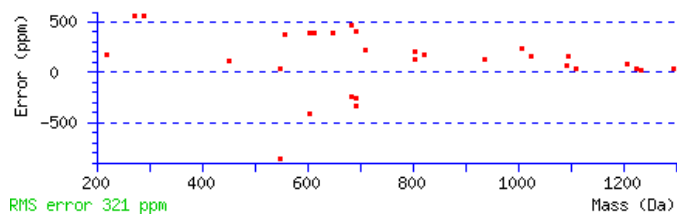

NCBI BLAST search of [SKGLGSDLDSSLASL](#)

(Parameters: blastp, nr protein database, expect=20000, no filter, PAM30)

Other BLAST [web gateways](#)

#### All matches to this query

| Score | Mr(calc)  | Delta   | Sequence                        |
|-------|-----------|---------|---------------------------------|
| 50.8  | 1512.8487 | 0.0080  | <a href="#">SKGLGSDLDSSLASL</a> |
| 39.4  | 1512.8293 | 0.0274  | <a href="#">GGPHTKMGGSRDSL</a>  |
| 35.7  | 1512.9160 | -0.0593 | <a href="#">MTKPLVHSSLALS</a>   |
| 31.8  | 1513.0396 | -0.1829 | <a href="#">NFLTAIKKVIASL</a>   |
| 29.1  | 1512.7821 | 0.0746  | <a href="#">QSLSSSTATGTTVI</a>  |
| 28.8  | 1512.9037 | -0.0469 | <a href="#">VASLLNSMKSIASL</a>  |
| 28.3  | 1512.6878 | 0.1689  | <a href="#">NCDSSLNRTYAIS</a>   |
| 27.7  | 1512.8286 | 0.0281  | <a href="#">EPELLTALSISASL</a>  |
| 27.3  | 1512.8562 | 0.0005  | <a href="#">VSALAQDTHRATLV</a>  |
| 26.8  | 1512.8309 | 0.0258  | <a href="#">SQLSMKASLENSL</a>   |

Mascot: <http://www.matrixscience.com/>

Mascot Search Results

Peptide View

MS/MS Fragmentation of **SPSPTPATQSPKKPPAKDPLADLNKDFL**  
Found in **AP180\_MOUSE** in **SwissProt**, Clathrin coat assembly protein AP180 OS=Mus musculus GN=Snap91 PE=1 SV=1

Match to Query 10492: 3232.944496 from(809.243400,4+) intensity(189922.9200) scans(10602) rawscans(sn10602) rtinseconds(3964.6895) index(7798)  
Title: 7799: Scan 10602 (rt=3964.69) [C:\Users\Administrador\Desktop\AMOSTRAS NO ORBITRAP LEANDRO RODAR NOVAMENTE\HIPOCAMPO\hipocampo\_01.raw]  
Data file hipocampo\_01.temp.mgf

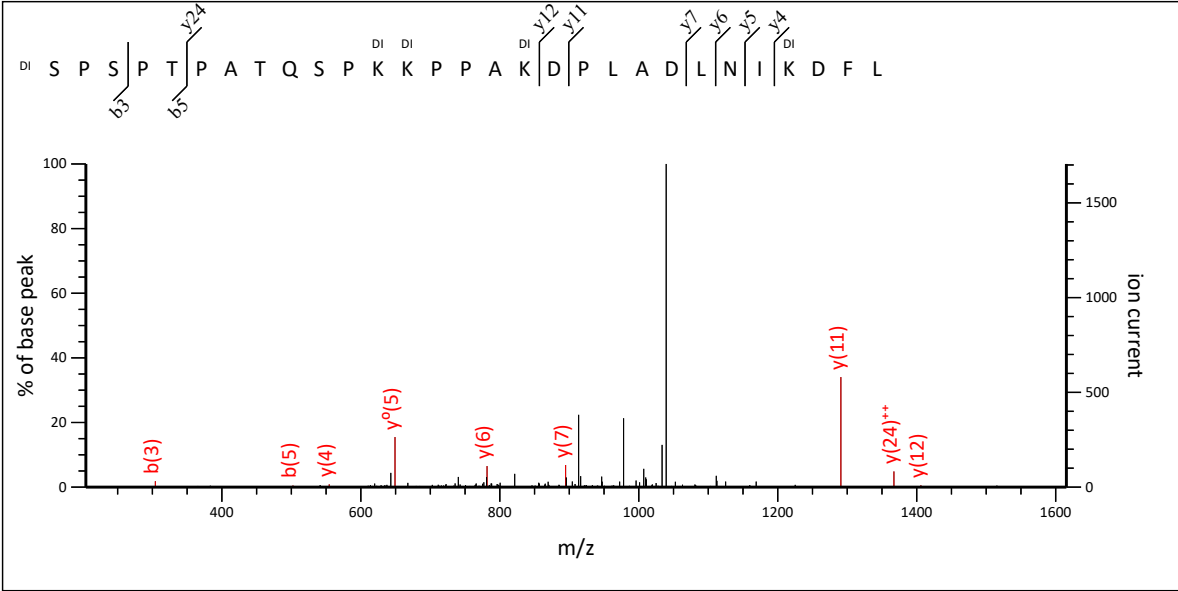

Navigation icons: ? (help), zoom in, zoom out, reset, and a range selector showing 204.27 to 1615.4.

Label all possible matches ☐ Label matches used for scoring ☒

Monoisotopic mass of neutral peptide Mr(calc): 3232.9316  
Variable modifications:  
N-term : Dimethyl:2H(4) (N-term)  
K12 : Dimethyl:2H(4) (K)  
K13 : Dimethyl:2H(4) (K)  
K17 : Dimethyl:2H(4) (K)  
K26 : Dimethyl:2H(4) (K)  
Ions Score: 20 Expect: 3.3e+002  
Matches : 9/310 fragment ions using 13 most intense peaks ([help](#))

| #  | b         | b <sup>++</sup> | b <sup>*</sup> | b <sup>*++</sup> | b <sup>0</sup> | b <sup>0++</sup> | Seq. | y         | y <sup>++</sup> | y <sup>*</sup> | y <sup>*++</sup> | y <sup>0</sup> | y <sup>0++</sup> | #  |
|----|-----------|-----------------|----------------|------------------|----------------|------------------|------|-----------|-----------------|----------------|------------------|----------------|------------------|----|
| 1  | 120.0957  | 60.5515         |                |                  | 102.0851       | 51.5462          | S    |           |                 |                |                  |                |                  | 29 |
| 2  | 217.1485  | 109.0779        |                |                  | 199.1379       | 100.0726         | P    | 3114.8504 | 1557.9289       | 3097.8239      | 1549.4156        | 3096.8399      | 1548.9236        | 28 |
| 3  | 304.1805  | 152.5939        |                |                  | 286.1699       | 143.5886         | S    | 3017.7977 | 1509.4025       | 3000.7711      | 1500.8892        | 2999.7871      | 1500.3972        | 27 |
| 4  | 401.2333  | 201.1203        |                |                  | 383.2227       | 192.1150         | P    | 2930.7656 | 1465.8865       | 2913.7391      | 1457.3732        | 2912.7551      | 1456.8812        | 26 |
| 5  | 502.2809  | 251.6441        |                |                  | 484.2704       | 242.6388         | T    | 2833.7129 | 1417.3601       | 2816.6863      | 1408.8468        | 2815.7023      | 1408.3548        | 25 |
| 6  | 599.3337  | 300.1705        |                |                  | 581.3231       | 291.1652         | P    | 2732.6652 | 1366.8362       | 2715.6386      | 1358.3230        | 2714.6546      | 1357.8310        | 24 |
| 7  | 670.3708  | 335.6891        |                |                  | 652.3603       | 326.6838         | A    | 2635.6124 | 1318.3099       | 2618.5859      | 1309.7966        | 2617.6019      | 1309.3046        | 23 |
| 8  | 771.4185  | 386.2129        |                |                  | 753.4079       | 377.2076         | T    | 2564.5753 | 1282.7913       | 2547.5488      | 1274.2780        | 2546.5648      | 1273.7860        | 22 |
| 9  | 899.4771  | 450.2422        | 882.4505       | 441.7289         | 881.4665       | 441.2369         | Q    | 2463.5276 | 1232.2675       | 2446.5011      | 1223.7542        | 2445.5171      | 1223.2622        | 21 |
| 10 | 986.5091  | 493.7582        | 969.4826       | 485.2449         | 968.4985       | 484.7529         | S    | 2335.4691 | 1168.2382       | 2318.4425      | 1159.7249        | 2317.4585      | 1159.2329        | 20 |
| 11 | 1083.5619 | 542.2846        | 1066.5353      | 533.7713         | 1065.5513      | 533.2793         | P    | 2248.4370 | 1124.7222       | 2231.4105      | 1116.2089        | 2230.4265      | 1115.7169        | 19 |
| 12 | 1243.7132 | 622.3603        | 1226.6867      | 613.8470         | 1225.7027      | 613.3550         | K    | 2151.3843 | 1076.1958       | 2134.3577      | 1067.6825        | 2133.3737      | 1067.1905        | 18 |
| 13 | 1403.8646 | 702.4359        | 1386.8381      | 693.9227         | 1385.8540      | 693.4307         | K    | 1991.2329 | 996.1201        | 1974.2063      | 987.6068         | 1973.2223      | 987.1148         | 17 |
| 14 | 1500.9174 | 750.9623        | 1483.8908      | 742.4491         | 1482.9068      | 741.9570         | P    | 1831.0815 | 916.0444        | 1814.0550      | 907.5311         | 1813.0710      | 907.0391         | 16 |
| 15 | 1597.9701 | 799.4887        | 1580.9436      | 790.9754         | 1579.9596      | 790.4834         | P    | 1734.0288 | 867.5180        | 1717.0022      | 859.0047         | 1716.0182      | 858.5127         | 15 |
| 16 | 1669.0073 | 835.0073        | 1651.9807      | 826.4940         | 1650.9967      | 826.0020         | A    | 1636.9760 | 818.9916        | 1619.9495      | 810.4784         | 1618.9654      | 809.9864         | 14 |
| 17 | 1829.1586 | 915.0830        | 1812.1321      | 906.5697         | 1811.1481      | 906.0777         | K    | 1565.9389 | 783.4731        | 1548.9123      | 774.9598         | 1547.9283      | 774.4678         | 13 |
| 18 | 1944.1856 | 972.5964        | 1927.1590      | 964.0831         | 1926.1750      | 963.5911         | D    | 1405.7875 | 703.3974        | 1388.7610      | 694.8841         | 1387.7770      | 694.3921         | 12 |
| 19 | 2041.2383 | 1021.1228       | 2024.2118      | 1012.6095        | 2023.2278      | 1012.1175        | P    | 1290.7606 | 645.8839        | 1273.7340      | 637.3706         | 1272.7500      | 636.8786         | 11 |

|    |           |           |           |           |           |           |   |           |          |           |          |           |          |    |
|----|-----------|-----------|-----------|-----------|-----------|-----------|---|-----------|----------|-----------|----------|-----------|----------|----|
| 20 | 2154.3224 | 1077.6648 | 2137.2958 | 1069.1516 | 2136.3118 | 1068.6596 | L | 1193.7078 | 597.3575 | 1176.6813 | 588.8443 | 1175.6972 | 588.3523 | 10 |
| 21 | 2225.3595 | 1113.1834 | 2208.3330 | 1104.6701 | 2207.3489 | 1104.1781 | A | 1080.6237 | 540.8155 | 1063.5972 | 532.3022 | 1062.6132 | 531.8102 | 9  |
| 22 | 2340.3865 | 1170.6969 | 2323.3599 | 1162.1836 | 2322.3759 | 1161.6916 | D | 1009.5866 | 505.2970 | 992.5601  | 496.7837 | 991.5761  | 496.2917 | 8  |
| 23 | 2453.4705 | 1227.2389 | 2436.4440 | 1218.7256 | 2435.4600 | 1218.2336 | L | 894.5597  | 447.7835 | 877.5331  | 439.2702 | 876.5491  | 438.7782 | 7  |
| 24 | 2567.5134 | 1284.2604 | 2550.4869 | 1275.7471 | 2549.5029 | 1275.2551 | N | 781.4756  | 391.2414 | 764.4491  | 382.7282 | 763.4651  | 382.2362 | 6  |
| 25 | 2680.5975 | 1340.8024 | 2663.5710 | 1332.2891 | 2662.5869 | 1331.7971 | I | 667.4327  | 334.2200 | 650.4061  | 325.7067 | 649.4221  | 325.2147 | 5  |
| 26 | 2840.7489 | 1420.8781 | 2823.7223 | 1412.3648 | 2822.7383 | 1411.8728 | K | 554.3486  | 277.6780 | 537.3221  | 269.1647 | 536.3381  | 268.6727 | 4  |
| 27 | 2955.7758 | 1478.3915 | 2938.7493 | 1469.8783 | 2937.7653 | 1469.3863 | D | 394.1973  | 197.6023 |           |          | 376.1867  | 188.5970 | 3  |
| 28 | 3102.8442 | 1551.9258 | 3085.8177 | 1543.4125 | 3084.8337 | 1542.9205 | F | 279.1703  | 140.0888 |           |          |           |          | 2  |
| 29 |           |           |           |           |           |           | L | 132.1019  | 66.5546  |           |          |           |          | 1  |

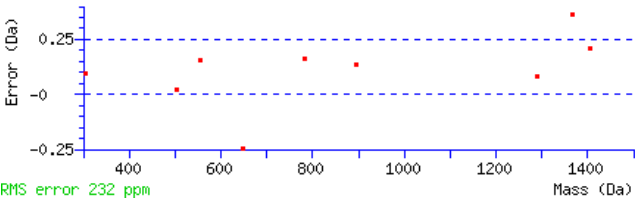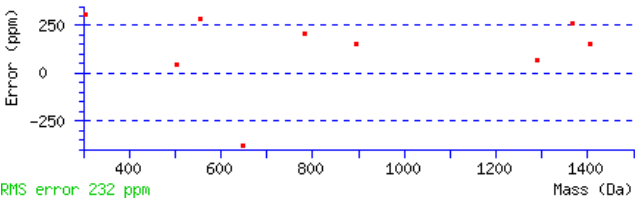

NCBI BLAST search of [SPSPTPATQSPKKPPAKDPLADLNIKDFL](#)  
(Parameters: blastp, nr protein database, expect=20000, no filter, PAM30)  
Other BLAST [web gateways](#)

All matches to this query

| Score | Mr(calc)  | Delta  | Sequence                                      |
|-------|-----------|--------|-----------------------------------------------|
| 20.5  | 3232.9316 | 0.0129 | <a href="#">SPSPTPATQSPKKPPAKDPLADLNIKDFL</a> |
| 18.7  | 3232.6049 | 0.3396 | <a href="#">FLRFIPTYTSRLAIISQSGQCQFCEPTG</a>  |
| 14.3  | 3232.6132 | 0.3313 | <a href="#">LMAIAHGSGPLMMIVFGEMTDKFVDNTG</a>  |
| 13.9  | 3232.6975 | 0.2470 | <a href="#">FLTDGASAMLIMSEDRALAMGYKPKAYL</a>  |
| 13.7  | 3232.6431 | 0.3014 | <a href="#">DKDIVMLQTGVSMMDPNHFLMIMLSRF</a>   |
| 13.6  | 3232.7254 | 0.2190 | <a href="#">SYLITTPCYSDAFKLL ESGDLSMNSIK</a>  |
| 13.6  | 3232.5079 | 0.4366 | <a href="#">NIDSDSILMSILDMSLHQMGSDRDLOS</a>   |
| 13.4  | 3232.7629 | 0.1816 | <a href="#">QSLEYLINDIRPPCIKEQMLGKGYETV</a>   |
| 12.7  | 3232.7576 | 0.1869 | <a href="#">CPNPKFINRSMATKGLLLPSRRSLASF</a>   |
| 11.8  | 3232.6950 | 0.2495 | <a href="#">PAHPTPFYIDDILGRGPAAPTPTPLSPNS</a> |

Mascot: <http://www.matrixscience.com/>



# Mascot Search Results

## Peptide View

MS/MS Fragmentation of **ARSGPFAPVLSAT**  
Found in **UCRI\_MOUSE** in **SwissProt**, Cytochrome b-c1 complex subunit Rieske, mitochondrial OS=Mus musculus GN=Uqcrfs1 PE=1 SV=1

Match to Query 3942: 1300.719408 from(651.366980,2+) intensity(53800.7110) scans(7400) rawscans(sn7400) rtinseconds(2841.3764) index(5181)  
Title: 5182: Scan 7400 (rt=2841.38) [C:\Users\Administrador\Desktop\AMOSTRAS NO ORBITRAP LEANDRO RODAR NOVAMENTE\CORTEX\cortex\_01.raw]  
Data file cortex\_01.temp.mgf

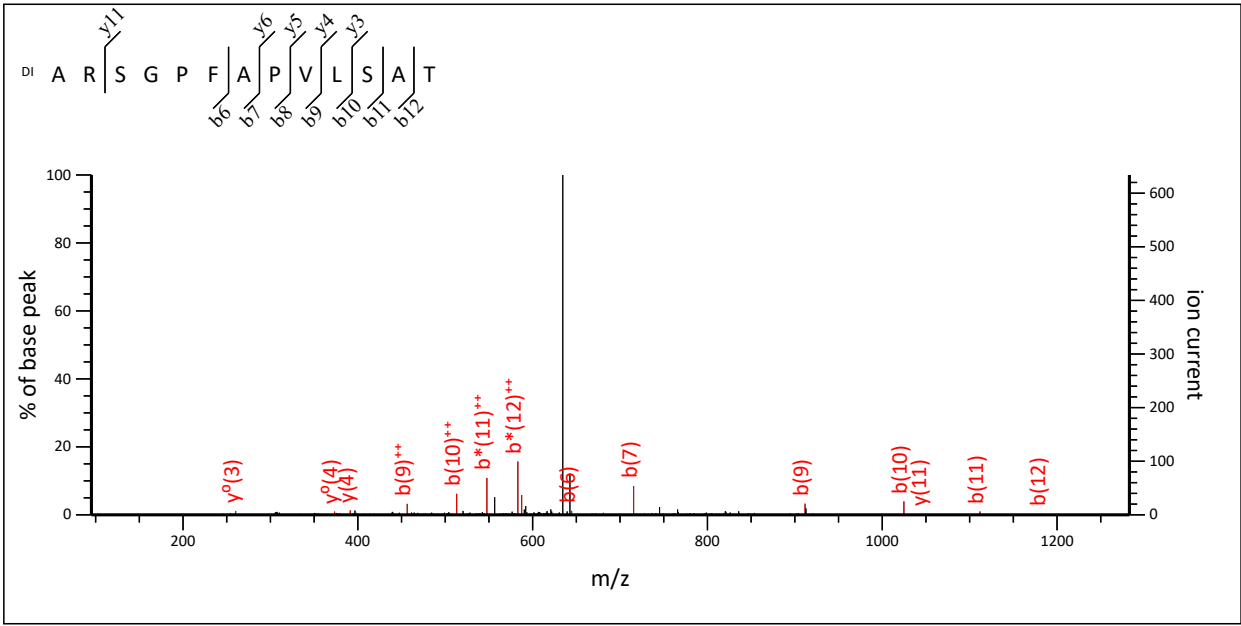

Navigation icons: ? (help), zoom in, zoom out, zoom reset, zoom full, zoom previous, zoom next, zoom home, zoom previous, zoom next, zoom home. Search range: 95.19 to 1282.8.

Label all possible matches ☐ Label matches used for scoring ☒

Monoisotopic mass of neutral peptide Mr(calc): 1300.7139  
Variable modifications:  
N-term : Dimethyl (N-term)  
Ions Score: 24 Expect: 1.2e+002  
Matches : 19/116 fragment ions using 37 most intense peaks ([help](#))

| #  | b         | b <sup>++</sup> | b <sup>*</sup> | b <sup>*++</sup> | b <sup>0</sup> | b <sup>0++</sup> | Seq. | y         | y <sup>++</sup> | y <sup>*</sup> | y <sup>*++</sup> | y <sup>0</sup> | y <sup>0++</sup> | #  |
|----|-----------|-----------------|----------------|------------------|----------------|------------------|------|-----------|-----------------|----------------|------------------|----------------|------------------|----|
| 1  | 100.0757  | 50.5415         |                |                  |                |                  | A    |           |                 |                |                  |                |                  | 13 |
| 2  | 256.1768  | 128.5920        | 239.1503       | 120.0788         |                |                  | R    | 1202.6528 | 601.8300        | 1185.6263      | 593.3168         | 1184.6422      | 592.8248         | 12 |
| 3  | 343.2088  | 172.1081        | 326.1823       | 163.5948         | 325.1983       | 163.1028         | S    | 1046.5517 | 523.7795        |                |                  | 1028.5411      | 514.7742         | 11 |
| 4  | 400.2303  | 200.6188        | 383.2037       | 192.1055         | 382.2197       | 191.6135         | G    | 959.5197  | 480.2635        |                |                  | 941.5091       | 471.2582         | 10 |
| 5  | 497.2831  | 249.1452        | 480.2565       | 240.6319         | 479.2725       | 240.1399         | P    | 902.4982  | 451.7527        |                |                  | 884.4876       | 442.7475         | 9  |
| 6  | 644.3515  | 322.6794        | 627.3249       | 314.1661         | 626.3409       | 313.6741         | F    | 805.4454  | 403.2264        |                |                  | 787.4349       | 394.2211         | 8  |
| 7  | 715.3886  | 358.1979        | 698.3620       | 349.6847         | 697.3780       | 349.1926         | A    | 658.3770  | 329.6921        |                |                  | 640.3665       | 320.6869         | 7  |
| 8  | 812.4413  | 406.7243        | 795.4148       | 398.2110         | 794.4308       | 397.7190         | P    | 587.3399  | 294.1736        |                |                  | 569.3293       | 285.1683         | 6  |
| 9  | 911.5098  | 456.2585        | 894.4832       | 447.7452         | 893.4992       | 447.2532         | V    | 490.2871  | 245.6472        |                |                  | 472.2766       | 236.6419         | 5  |
| 10 | 1024.5938 | 512.8006        | 1007.5673      | 504.2873         | 1006.5833      | 503.7953         | L    | 391.2187  | 196.1130        |                |                  | 373.2082       | 187.1077         | 4  |
| 11 | 1111.6259 | 556.3166        | 1094.5993      | 547.8033         | 1093.6153      | 547.3113         | S    | 278.1347  | 139.5710        |                |                  | 260.1241       | 130.5657         | 3  |
| 12 | 1182.6630 | 591.8351        | 1165.6364      | 583.3218         | 1164.6524      | 582.8298         | A    | 191.1026  | 96.0550         |                |                  | 173.0921       | 87.0497          | 2  |
| 13 |           |                 |                |                  |                |                  | T    | 120.0655  | 60.5364         |                |                  | 102.0550       | 51.5311          | 1  |

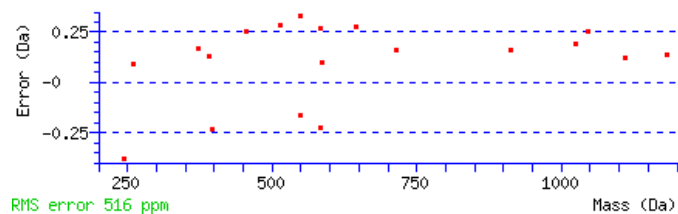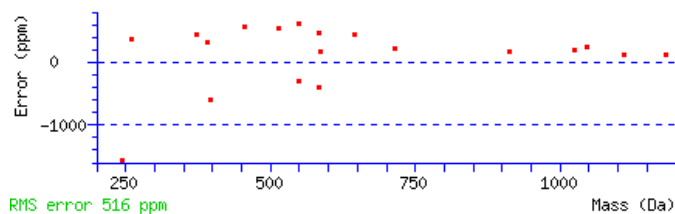

NCBI **BLAST** search of [ARSGPFAPVLSAT](#)

(Parameters: blastp, nr protein database, expect=20000, no filter, PAM30)

Other BLAST [web gateways](#)

#### All matches to this query

| Score | Mr(calc)  | Delta   | Sequence                       |
|-------|-----------|---------|--------------------------------|
| 32.7  | 1300.8016 | -0.0822 | <a href="#">INITPLARLSAT</a>   |
| 32.6  | 1300.8380 | -0.1186 | <a href="#">SGTLRLVLGLLQ</a>   |
| 24.4  | 1300.7602 | -0.0408 | <a href="#">IGDKGVSKLSAT</a>   |
| 24.1  | 1300.7523 | -0.0329 | <a href="#">TYLGMSKISAT</a>    |
| 23.9  | 1300.7139 | 0.0055  | <a href="#">ARSGPFAPVLSAT</a>  |
| 23.6  | 1300.5964 | 0.1230  | <a href="#">HSEDYNLSTA</a>     |
| 22.9  | 1300.7420 | -0.0226 | <a href="#">GALAQPVPVPAEAT</a> |
| 20.1  | 1300.6489 | 0.0705  | <a href="#">NSDYFIPISAT</a>    |
| 19.8  | 1300.7391 | -0.0197 | <a href="#">KYGTHLLISAT</a>    |
| 19.3  | 1300.6053 | 0.1141  | <a href="#">CSPVQSMRSSAT</a>   |

Mascot: <http://www.matrixscience.com/>

Mascot Search Results

Peptide View

MS/MS Fragmentation of **GLNVPASVRF**  
Found in **UCRI\_MOUSE** in **SwissProt**, Cytochrome b-c1 complex subunit Rieske, mitochondrial OS=Mus musculus GN=Uqcrfs1  
PE=1 SV=1

Match to Query 2441: 1086.620988 from(544.317770,2+) intensity(154132.7200) scans(8139) rawscans(sn8139)  
rtinseconds(3109.3608) index(5788)  
Title: 5789: Scan 8139 (rt=3109.36) [C:\Users\Administrador\Desktop\AMOSTRAS NO ORBITRAP LEANDRO RODAR  
NOVAMENTE\CORTEX\cortex\_01.raw]  
Data file cortex\_01.temp.mgf

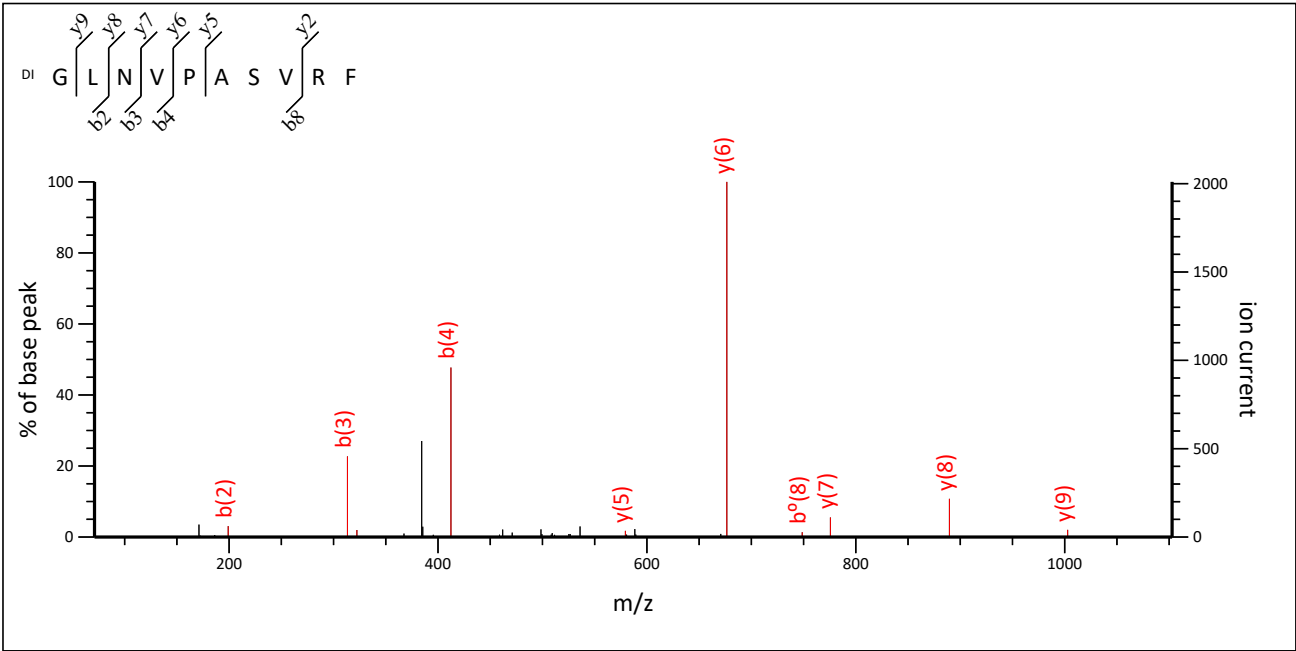





71.14 to 1102.81 



Label all possible matches ☐ Label matches used for scoring ☒

Monoisotopic mass of neutral peptide Mr(calc): 1086.6186  
Variable modifications:  
N-term : Dimethyl (N-term)  
Ions Score: 48 Expect: 0.51  
Matches : 10/84 fragment ions using 15 most intense peaks ([help](#))

| #  | b        | b <sup>++</sup> | b <sup>*</sup> | b <sup>*++</sup> | b <sup>0</sup> | b <sup>0++</sup> | Seq. | y         | y <sup>++</sup> | y <sup>*</sup> | y <sup>*++</sup> | y <sup>0</sup> | y <sup>0++</sup> | #  |
|----|----------|-----------------|----------------|------------------|----------------|------------------|------|-----------|-----------------|----------------|------------------|----------------|------------------|----|
| 1  | 86.0600  | 43.5337         |                |                  |                |                  | G    |           |                 |                |                  |                |                  | 10 |
| 2  | 199.1441 | 100.0757        |                |                  |                |                  | L    | 1002.5731 | 501.7902        | 985.5465       | 493.2769         | 984.5625       | 492.7849         | 9  |
| 3  | 313.1870 | 157.0972        | 296.1605       | 148.5839         |                |                  | N    | 889.4890  | 445.2482        | 872.4625       | 436.7349         | 871.4785       | 436.2429         | 8  |
| 4  | 412.2554 | 206.6314        | 395.2289       | 198.1181         |                |                  | V    | 775.4461  | 388.2267        | 758.4196       | 379.7134         | 757.4355       | 379.2214         | 7  |
| 5  | 509.3082 | 255.1577        | 492.2817       | 246.6445         |                |                  | P    | 676.3777  | 338.6925        | 659.3511       | 330.1792         | 658.3671       | 329.6872         | 6  |
| 6  | 580.3453 | 290.6763        | 563.3188       | 282.1630         |                |                  | A    | 579.3249  | 290.1661        | 562.2984       | 281.6528         | 561.3144       | 281.1608         | 5  |
| 7  | 667.3774 | 334.1923        | 650.3508       | 325.6790         | 649.3668       | 325.1870         | S    | 508.2878  | 254.6475        | 491.2613       | 246.1343         | 490.2772       | 245.6423         | 4  |
| 8  | 766.4458 | 383.7265        | 749.4192       | 375.2132         | 748.4352       | 374.7212         | V    | 421.2558  | 211.1315        | 404.2292       | 202.6183         |                |                  | 3  |
| 9  | 922.5469 | 461.7771        | 905.5203       | 453.2638         | 904.5363       | 452.7718         | R    | 322.1874  | 161.5973        | 305.1608       | 153.0840         |                |                  | 2  |
| 10 |          |                 |                |                  |                |                  | F    | 166.0863  | 83.5468         |                |                  |                |                  | 1  |

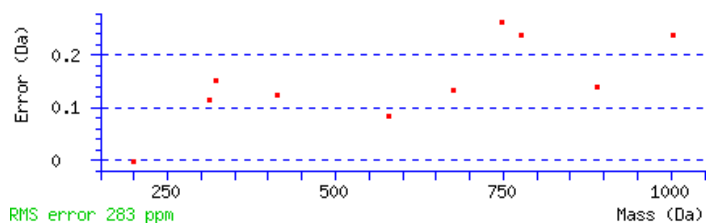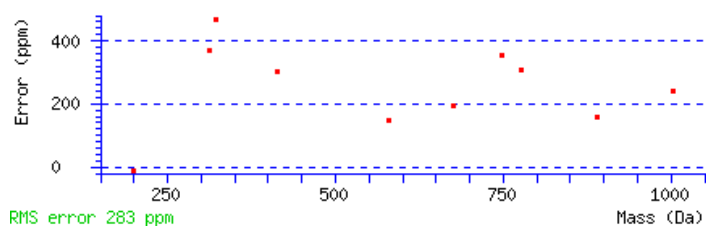

NCBI **BLAST** search of [GLNVPASVRE](#)

(Parameters: blastp, nr protein database, expect=20000, no filter, PAM30)

Other BLAST [web gateways](#)

#### All matches to this query

| Score | Mr(calc)  | Delta  | Sequence                       |
|-------|-----------|--------|--------------------------------|
| 47.6  | 1086.6186 | 0.0024 | <a href="#">GLNVPASVRE</a>     |
| 27.5  | 1086.6107 | 0.0103 | <a href="#">GLGGVGLAVIMG</a>   |
| 27.5  | 1086.6107 | 0.0103 | <a href="#">GLGGVGLSVIMG</a>   |
| 24.8  | 1086.5380 | 0.0830 | <a href="#">QNVGTPVMVG</a>     |
| 22.3  | 1086.5305 | 0.0904 | <a href="#">GLAAAPGGSGAGSS</a> |
| 22.0  | 1086.5896 | 0.0314 | <a href="#">GIKGPAGMPGE</a>    |
| 21.3  | 1086.5822 | 0.0388 | <a href="#">QNVPRYLQ</a>       |
| 21.0  | 1086.5669 | 0.0540 | <a href="#">QRVPGLSSDT</a>     |
| 19.6  | 1086.5557 | 0.0653 | <a href="#">QNVADSVEK</a>      |
| 19.6  | 1086.5532 | 0.0678 | <a href="#">QVHLGAVFM</a>      |

Mascot: <http://www.matrixscience.com/>

# Mascot Search Results

## Peptide View

MS/MS Fragmentation of **SGQAAARPLVA**

Found in **UCRI\_MOUSE** in **SwissProt**, Cytochrome b-c1 complex subunit Rieske, mitochondrial OS=Mus musculus  
GN=Uqcrfs1 PE=1 SV=1

Match to Query 2316: 1071.635948 from(536.825250,2+) intensity(150756.6900) scans(3397) rawscans(sn3397)

rtinseconds(1478.1366) index(1654)

Title: 1655: Scan 3397 (rt=1478.14) [C:\Users\Administrador\Desktop\AMOSTRAS NO ORBITRAP LEANDRO RODAR NOVAMENTE\HIPOCAMPO\hipocampo\_01.raw]

Data file hipocampo\_01.temp.mgf

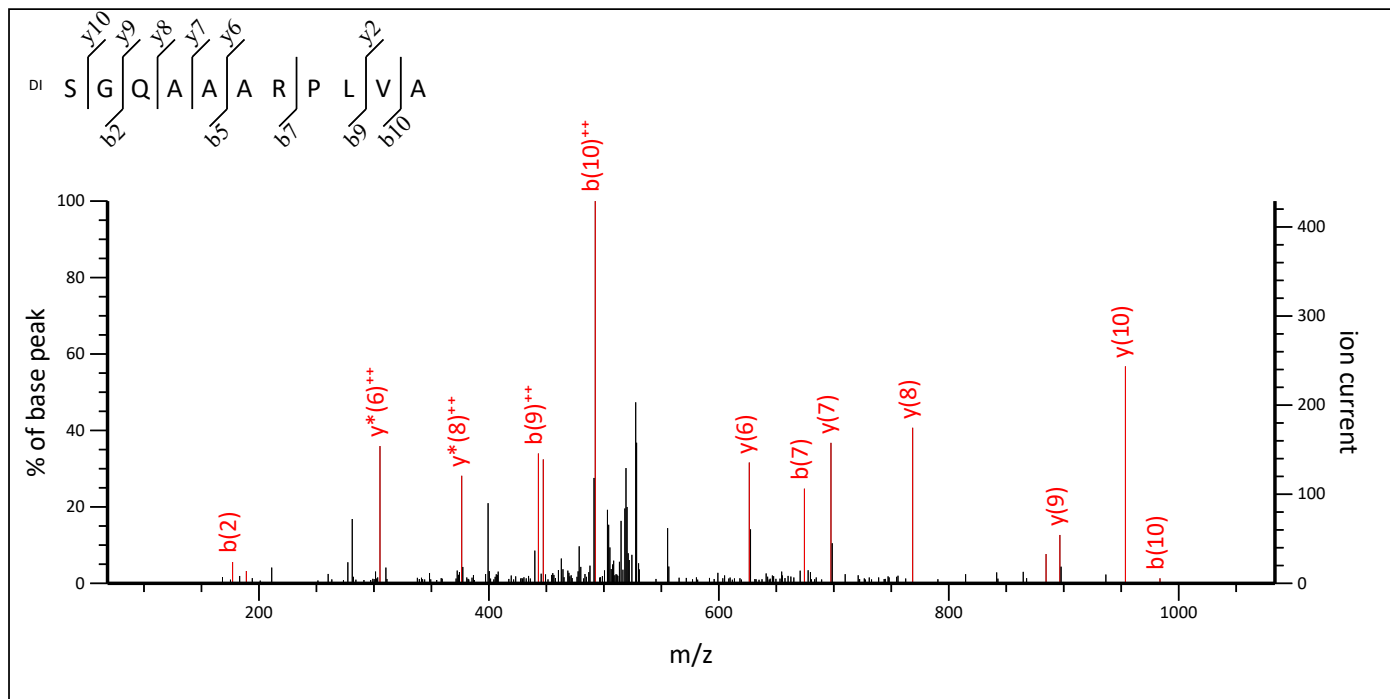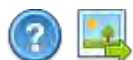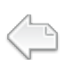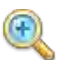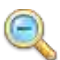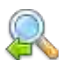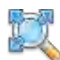

68.29 to 1083.72

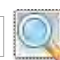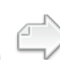

Label all possible matches ☐ Label matches used for scoring ☒

Monoisotopic mass of neutral peptide Mr(calc): 1071.6338

Variable modifications:

N-term : Dimethyl:2H(4) (N-term)

Ions Score: 51 Expect: 0.21

Matches : 18/88 fragment ions using 25 most intense peaks ([help](#))

| #  | b               | b <sup>++</sup> | b <sup>*</sup> | b <sup>*++</sup> | b <sup>0</sup> | b <sup>0++</sup> | Seq. | y               | y <sup>++</sup> | y <sup>*</sup> | y <sup>*++</sup> | #  |
|----|-----------------|-----------------|----------------|------------------|----------------|------------------|------|-----------------|-----------------|----------------|------------------|----|
| 1  | 120.0957        | 60.5515         |                |                  | 102.0851       | 51.5462          | S    |                 |                 |                |                  | 11 |
| 2  | <b>177.1172</b> | 89.0622         |                |                  | 159.1066       | 80.0569          | G    | <b>953.5527</b> | 477.2800        | 936.5261       | 468.7667         | 10 |
| 3  | <b>305.1758</b> | 153.0915        | 288.1492       | 144.5782         | 287.1652       | 144.0862         | Q    | <b>896.5312</b> | 448.7693        | 879.5047       | 440.2560         | 9  |
| 4  | <b>376.2129</b> | <b>188.6101</b> | 359.1863       | 180.0968         | 358.2023       | 179.6048         | A    | <b>768.4727</b> | 384.7400        | 751.4461       | <b>376.2267</b>  | 8  |
| 5  | <b>447.2500</b> | 224.1286        | 430.2234       | 215.6154         | 429.2394       | 215.1233         | A    | <b>697.4355</b> | 349.2214        | 680.4090       | 340.7081         | 7  |
| 6  | 518.2871        | 259.6472        | 501.2605       | 251.1339         | 500.2765       | 250.6419         | A    | <b>626.3984</b> | 313.7028        | 609.3719       | <b>305.1896</b>  | 6  |
| 7  | <b>674.3882</b> | 337.6977        | 657.3617       | 329.1845         | 656.3776       | 328.6925         | R    | 555.3613        | 278.1843        | 538.3348       | 269.6710         | 5  |
| 8  | 771.4410        | 386.2241        | 754.4144       | 377.7108         | 753.4304       | 377.2188         | P    | 399.2602        | 200.1337        |                |                  | 4  |
| 9  | <b>884.5250</b> | <b>442.7662</b> | 867.4985       | 434.2529         | 866.5145       | 433.7609         | L    | 302.2074        | 151.6074        |                |                  | 3  |
| 10 | <b>983.5934</b> | <b>492.3004</b> | 966.5669       | 483.7871         | 965.5829       | 483.2951         | V    | <b>189.1234</b> | 95.0653         |                |                  | 2  |
| 11 |                 |                 |                |                  |                |                  | A    | 90.0550         | 45.5311         |                |                  | 1  |

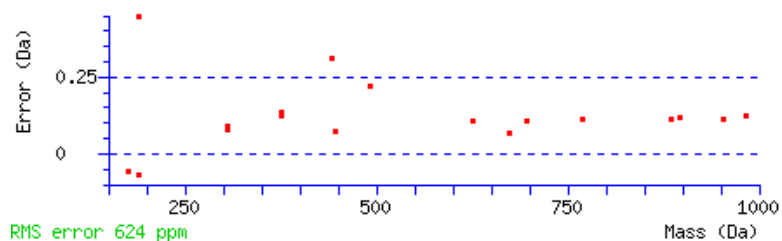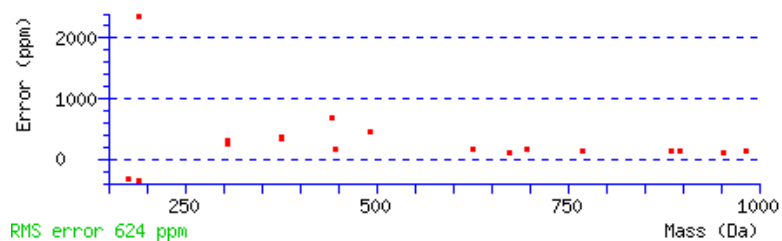

NCBI **BLAST** search of [SGQAAARPLVA](#)

(Parameters: blastp, nr protein database, expect=20000, no filter, PAM30)

Other BLAST [web gateways](#)

#### All matches to this query

| Score | Mr(calc)  | Delta   | Sequence                      |
|-------|-----------|---------|-------------------------------|
| 51.5  | 1071.6338 | 0.0021  | <a href="#">SGQAAARPLVA</a>   |
| 31.0  | 1071.5812 | 0.0548  | <a href="#">DILLTAAQGT</a>    |
| 30.2  | 1071.4509 | 0.1851  | <a href="#">FDNYSAQSA</a>     |
| 27.2  | 1071.6338 | 0.0021  | <a href="#">GGLLRPAAQSA</a>   |
| 26.1  | 1071.5461 | 0.0898  | <a href="#">HYRIGAQGT</a>     |
| 25.2  | 1071.7226 | -0.0867 | <a href="#">KLLQAAAGASA</a>   |
| 25.2  | 1071.5993 | 0.0366  | <a href="#">YLIGTAAGASA</a>   |
| 24.1  | 1071.5825 | 0.0535  | <a href="#">IYALHRNSA</a>     |
| 23.7  | 1071.6338 | 0.0021  | <a href="#">ARAVPVAGAASA</a>  |
| 23.5  | 1071.5862 | 0.0497  | <a href="#">GVGAVPAAAAGSA</a> |

Mascot: <http://www.matrixscience.com/>

# Mascot Search Results

## Peptide View

MS/MS Fragmentation of **SGQAAARPLVATV**  
Found in **UCRI\_MOUSE** in **SwissProt**, Cytochrome b-c1 complex subunit Rieske, mitochondrial OS=Mus musculus GN=Uqcrfs1 PE=1 SV=1

Match to Query 3605: 1271.753708 from(636.884130,2+) intensity(369882.6500) scans(5065-5081) rawscans(sn5065:sn5081) rtinseconds(2018.9559-2024.242) index(3073)  
Title: 3074: Sum of 2 scans in range 5065 (rt=2018.96) to 5081 (rt=2024.24) [C:\Users\Administrador\Desktop\AMOSTRAS NO ORBITRAP LEANDRO RODAR NOVAMENTE\HIPOCAMPO\hipocampo\_01.raw]  
Data file hipocampo\_01.temp.mgf

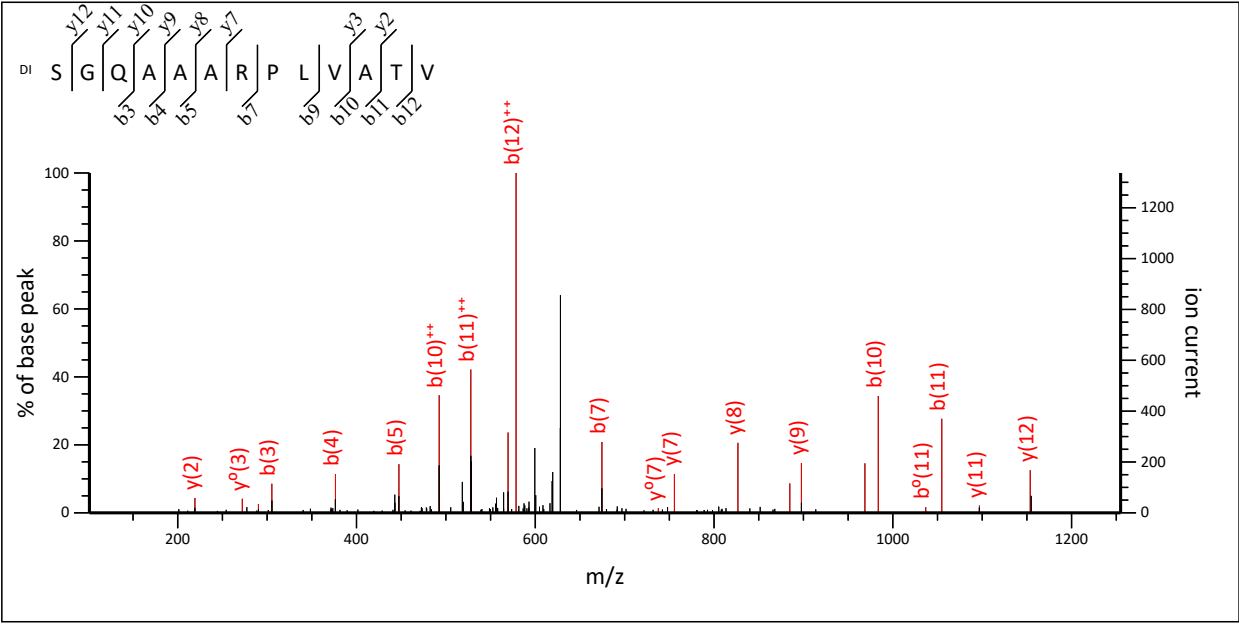

Navigation icons: ? (help), zoom in, zoom out, pan, and a search bar containing '101.21 to 1254.85'.

Label all possible matches ☐ Label matches used for scoring ☒

Monoisotopic mass of neutral peptide Mr(calc): 1271.7499  
Variable modifications:  
N-term : Dimethyl:2H(4) (N-term)  
Ions Score: 83 Expect: 0.00014  
Matches : 23/126 fragment ions using 29 most intense peaks ([help](#))

| #  | b         | b <sup>++</sup> | b <sup>*</sup> | b <sup>++</sup> * | b <sup>0</sup> | b <sup>0++</sup> | Seq. | y         | y <sup>++</sup> | y <sup>*</sup> | y <sup>++</sup> * | y <sup>0</sup> | y <sup>0++</sup> | #  |
|----|-----------|-----------------|----------------|-------------------|----------------|------------------|------|-----------|-----------------|----------------|-------------------|----------------|------------------|----|
| 1  | 120.0957  | 60.5515         |                |                   | 102.0851       | 51.5462          | S    |           |                 |                |                   |                |                  | 13 |
| 2  | 177.1172  | 89.0622         |                |                   | 159.1066       | 80.0569          | G    | 1153.6688 | 577.3380        | 1136.6422      | 568.8248          | 1135.6582      | 568.3327         | 12 |
| 3  | 305.1758  | 153.0915        | 288.1492       | 144.5782          | 287.1652       | 144.0862         | Q    | 1096.6473 | 548.8273        | 1079.6208      | 540.3140          | 1078.6368      | 539.8220         | 11 |
| 4  | 376.2129  | 188.6101        | 359.1863       | 180.0968          | 358.2023       | 179.6048         | A    | 968.5887  | 484.7980        | 951.5622       | 476.2847          | 950.5782       | 475.7927         | 10 |
| 5  | 447.2500  | 224.1286        | 430.2234       | 215.6154          | 429.2394       | 215.1233         | A    | 897.5516  | 449.2795        | 880.5251       | 440.7662          | 879.5411       | 440.2742         | 9  |
| 6  | 518.2871  | 259.6472        | 501.2605       | 251.1339          | 500.2765       | 250.6419         | A    | 826.5145  | 413.7609        | 809.4880       | 405.2476          | 808.5040       | 404.7556         | 8  |
| 7  | 674.3882  | 337.6977        | 657.3617       | 329.1845          | 656.3776       | 328.6925         | R    | 755.4774  | 378.2423        | 738.4509       | 369.7291          | 737.4668       | 369.2371         | 7  |
| 8  | 771.4410  | 386.2241        | 754.4144       | 377.7108          | 753.4304       | 377.2188         | P    | 599.3763  | 300.1918        |                |                   | 581.3657       | 291.1865         | 6  |
| 9  | 884.5250  | 442.7662        | 867.4985       | 434.2529          | 866.5145       | 433.7609         | L    | 502.3235  | 251.6654        |                |                   | 484.3130       | 242.6601         | 5  |
| 10 | 983.5934  | 492.3004        | 966.5669       | 483.7871          | 965.5829       | 483.2951         | V    | 389.2395  | 195.1234        |                |                   | 371.2289       | 186.1181         | 4  |
| 11 | 1054.6306 | 527.8189        | 1037.6040      | 519.3056          | 1036.6200      | 518.8136         | A    | 290.1710  | 145.5892        |                |                   | 272.1605       | 136.5839         | 3  |
| 12 | 1155.6782 | 578.3428        | 1138.6517      | 569.8295          | 1137.6677      | 569.3375         | T    | 219.1339  | 110.0706        |                |                   | 201.1234       | 101.0653         | 2  |
| 13 |           |                 |                |                   |                |                  | V    | 118.0863  | 59.5468         |                |                   |                |                  | 1  |

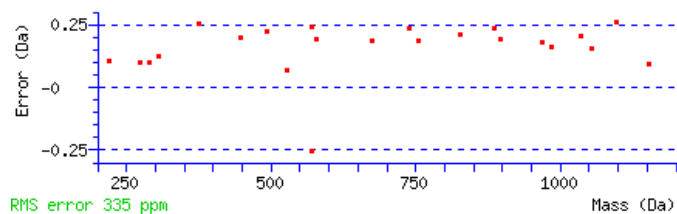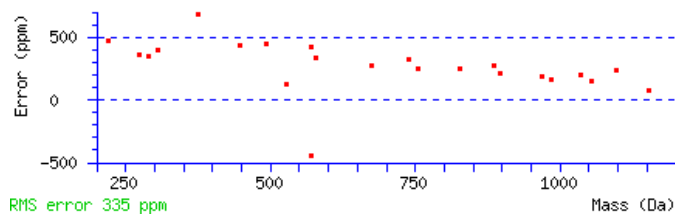

NCBI **BLAST** search of [SGQAAARPLVATV](#)

(Parameters: blastp, nr protein database, expect=20000, no filter, PAM30)

Other BLAST [web gateways](#)

#### All matches to this query

| Score | Mr(calc)  | Delta   | Sequence                       |
|-------|-----------|---------|--------------------------------|
| 83.2  | 1271.7499 | 0.0038  | <a href="#">SGQAAARPLVATV</a>  |
| 31.2  | 1271.6510 | 0.1027  | <a href="#">PHLANGYTTAVT</a>   |
| 27.4  | 1271.6408 | 0.1129  | <a href="#">QELQHSAAAQSA</a>   |
| 27.3  | 1271.5414 | 0.2123  | <a href="#">FEESCMEVATV</a>    |
| 26.4  | 1271.6209 | 0.1328  | <a href="#">MSTSGAAAAAAGGT</a> |
| 25.9  | 1271.7247 | 0.0290  | <a href="#">SVQEKTMVLGT</a>    |
| 25.1  | 1271.6469 | 0.1068  | <a href="#">TAAQAAAAAAGGTA</a> |
| 24.8  | 1271.7159 | 0.0378  | <a href="#">VTMINAIPVASL</a>   |
| 24.2  | 1271.8135 | -0.0598 | <a href="#">EAKRREVLSA</a>     |
| 24.1  | 1271.7903 | -0.0366 | <a href="#">WSVLRLPVALS</a>    |

Mascot: <http://www.matrixscience.com/>



Mascot Search Results

Peptide View

MS/MS Fragmentation of **TVGLNVPASVRF**  
Found in **UCRI\_MOUSE** in **SwissProt**, Cytochrome b-c1 complex subunit Rieske, mitochondrial OS=Mus musculus GN=Uqcrfs1 PE=1 SV=1

Match to Query 3711: 1286.737948 from(644.376250,2+) intensity(47278.7850) scans(9142) rawscans(sn9142) rtinseconds(3433.9542) index(6546)  
Title: 6547: Scan 9142 (rt=3433.95) [C:\Users\Administrador\Desktop\AMOSTRAS NO ORBITRAP LEANDRO RODAR NOVAMENTE\HIPOCAMPO\hipocampo\_01.raw]  
Data file hipocampo\_01.temp.mgf

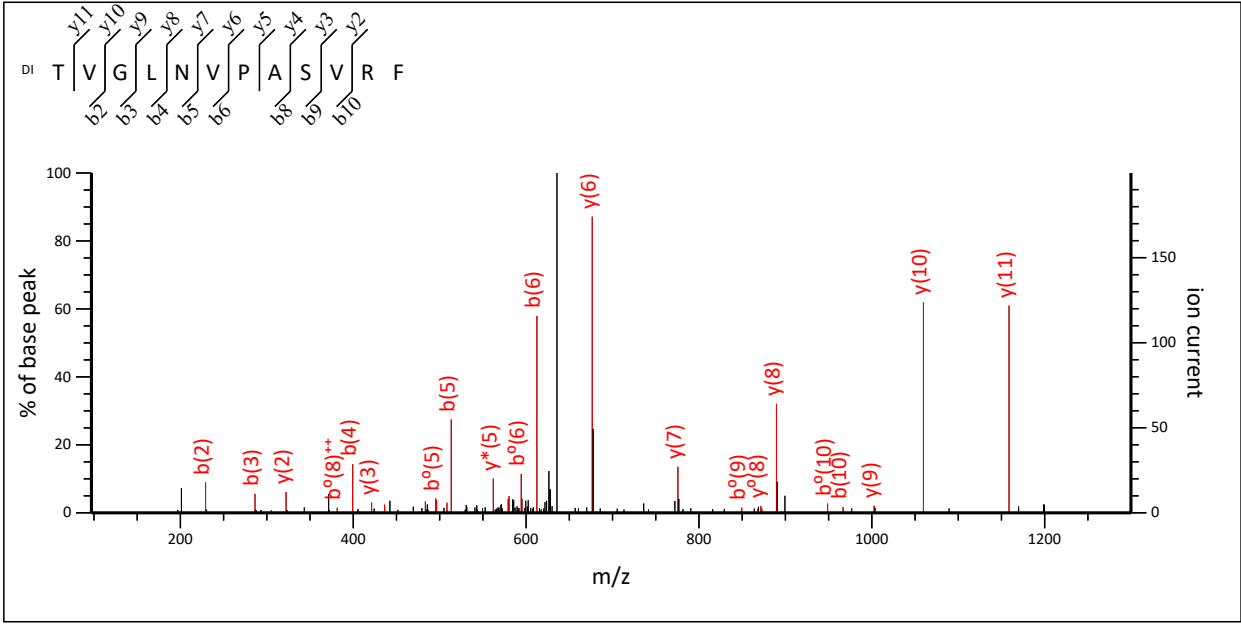

Navigation icons: ? (help), zoom in, zoom out, pan, and a range selector showing 97.07 to 1299.82.

Label all possible matches ☐ Label matches used for scoring ☒

Monoisotopic mass of neutral peptide Mr(calc): 1286.7347  
Variable modifications:  
N-term : Dimethyl (N-term)  
Ions Score: 55 Expect: 0.088  
Matches : 34/116 fragment ions using 71 most intense peaks (help)

| #  | b         | b <sup>++</sup> | b <sup>*</sup> | b <sup>+++</sup> | b <sup>0</sup> | b <sup>0++</sup> | Seq. | y         | y <sup>++</sup> | y <sup>*</sup> | y <sup>+++</sup> | y <sup>0</sup> | y <sup>0++</sup> | #  |
|----|-----------|-----------------|----------------|------------------|----------------|------------------|------|-----------|-----------------|----------------|------------------|----------------|------------------|----|
| 1  | 130.0863  | 65.5468         |                |                  | 112.0757       | 56.5415          | T    |           |                 |                |                  |                |                  | 12 |
| 2  | 229.1547  | 115.0810        |                |                  | 211.1441       | 106.0757         | V    | 1158.6630 | 579.8351        | 1141.6364      | 571.3218         | 1140.6524      | 570.8298         | 11 |
| 3  | 286.1761  | 143.5917        |                |                  | 268.1656       | 134.5864         | G    | 1059.5946 | 530.3009        | 1042.5680      | 521.7876         | 1041.5840      | 521.2956         | 10 |
| 4  | 399.2602  | 200.1337        |                |                  | 381.2496       | 191.1285         | L    | 1002.5731 | 501.7902        | 985.5465       | 493.2769         | 984.5625       | 492.7849         | 9  |
| 5  | 513.3031  | 257.1552        | 496.2766       | 248.6419         | 495.2926       | 248.1499         | N    | 889.4890  | 445.2482        | 872.4625       | 436.7349         | 871.4785       | 436.2429         | 8  |
| 6  | 612.3715  | 306.6894        | 595.3450       | 298.1761         | 594.3610       | 297.6841         | V    | 775.4461  | 388.2267        | 758.4196       | 379.7134         | 757.4355       | 379.2214         | 7  |
| 7  | 709.4243  | 355.2158        | 692.3978       | 346.7025         | 691.4137       | 346.2105         | P    | 676.3777  | 338.6925        | 659.3511       | 330.1792         | 658.3671       | 329.6872         | 6  |
| 8  | 780.4614  | 390.7343        | 763.4349       | 382.2211         | 762.4509       | 381.7291         | A    | 579.3249  | 290.1661        | 562.2984       | 281.6528         | 561.3144       | 281.1608         | 5  |
| 9  | 867.4934  | 434.2504        | 850.4669       | 425.7371         | 849.4829       | 425.2451         | S    | 508.2878  | 254.6475        | 491.2613       | 246.1343         | 490.2772       | 245.6423         | 4  |
| 10 | 966.5619  | 483.7846        | 949.5353       | 475.2713         | 948.5513       | 474.7793         | V    | 421.2558  | 211.1315        | 404.2292       | 202.6183         |                |                  | 3  |
| 11 | 1122.6630 | 561.8351        | 1105.6364      | 553.3218         | 1104.6524      | 552.8298         | R    | 322.1874  | 161.5973        | 305.1608       | 153.0840         |                |                  | 2  |
| 12 |           |                 |                |                  |                |                  | F    | 166.0863  | 83.5468         |                |                  |                |                  | 1  |

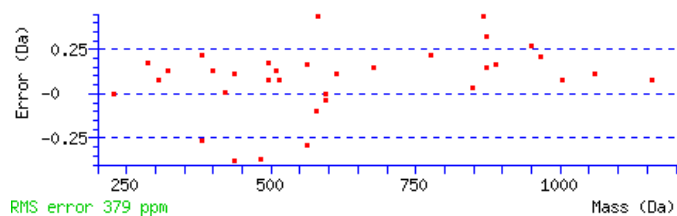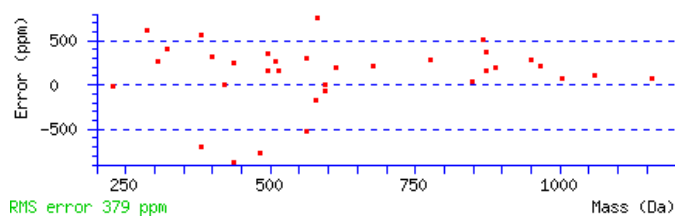

NCBI **BLAST** search of [TVGLNVPASVRF](#)

(Parameters: blastp, nr protein database, expect=20000, no filter, PAM30)

Other BLAST [web gateways](#)

#### All matches to this query

| Score | Mr(calc)  | Delta   | Sequence                     |
|-------|-----------|---------|------------------------------|
| 55.3  | 1286.7347 | 0.0033  | <a href="#">TVGLNVPASVRF</a> |
| 23.7  | 1286.8351 | -0.0972 | <a href="#">PVVSLSKNGKY</a>  |
| 22.4  | 1286.8761 | -0.1382 | <a href="#">KLQHPVARGLP</a>  |
| 21.9  | 1286.7235 | 0.0145  | <a href="#">GISQVVFVSNPI</a> |
| 21.9  | 1286.5965 | 0.1415  | <a href="#">SAGARVFEYMA</a>  |
| 19.8  | 1286.7995 | -0.0616 | <a href="#">KSCVWVNGLPL</a>  |
| 19.3  | 1286.7347 | 0.0033  | <a href="#">KTLNFDGRLPA</a>  |
| 19.3  | 1286.7950 | -0.0571 | <a href="#">LPRNKEPWIA</a>   |
| 18.6  | 1286.7234 | 0.0145  | <a href="#">VSAQKNYLGPI</a>  |
| 18.5  | 1286.7598 | -0.0219 | <a href="#">TVKQGQTLFIP</a>  |

Mascot: <http://www.matrixscience.com/>

# Mascot Search Results

## Peptide View

MS/MS Fragmentation of **GISTPEELGLDKV**  
Found in **COX5A\_MOUSE** in **SwissProt**, Cytochrome c oxidase subunit 5A, mitochondrial OS=Mus musculus GN=Cox5a PE=1 SV=2  
Match to Query 4478: 1412.778728 from(707.396640,2+) intensity(151348.6600) scans(8237) rawscans(sn8237) rtinseconds(3114.5524) index(5837)  
Title: 5838: Scan 8237 (rt=3114.55) [C:\Users\Administrador\Desktop\AMOSTRAS NO ORBITRAP LEANDRO RODAR NOVAMENTE\HIPOCAMPO\hipocampo\_01.raw]  
Data file hipocampo\_01.temp.mgf

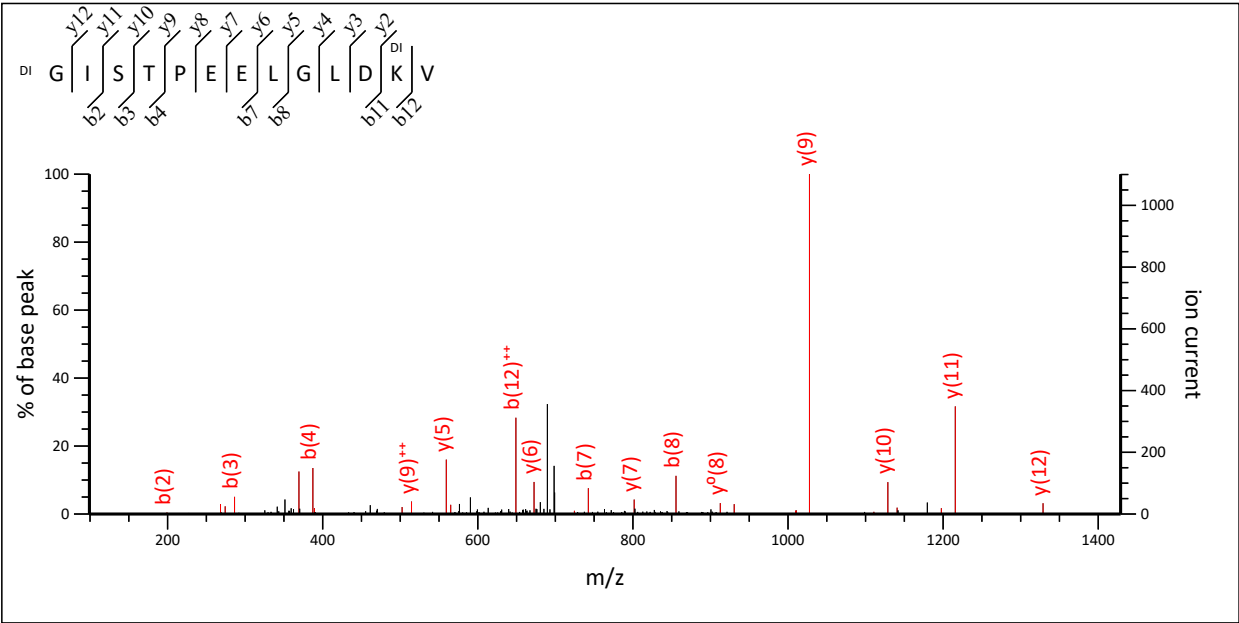

Navigation icons: ? (help), zoom in, zoom out, pan, and a range selector showing 99.21 to 1428.86.

Label all possible matches ☐ Label matches used for scoring ☒

Monoisotopic mass of neutral peptide Mr(calc): 1412.7763  
Variable modifications:  
N-term : Dimethyl (N-term)  
K12 : Dimethyl (K)  
Ions Score: 66 Expect: 0.007  
Matches : 29/112 fragment ions using 60 most intense peaks ([help](#))

| #  | b         | b <sup>++</sup> | b <sup>*</sup> | b <sup>*++</sup> | b <sup>0</sup> | b <sup>0++</sup> | Seq. | y         | y <sup>++</sup> | y <sup>*</sup> | y <sup>*++</sup> | y <sup>0</sup> | y <sup>0++</sup> | #  |
|----|-----------|-----------------|----------------|------------------|----------------|------------------|------|-----------|-----------------|----------------|------------------|----------------|------------------|----|
| 1  | 86.0600   | 43.5337         |                |                  |                |                  | G    |           |                 |                |                  |                |                  | 13 |
| 2  | 199.1441  | 100.0757        |                |                  |                |                  | I    | 1328.7308 | 664.8690        | 1311.7042      | 656.3558         | 1310.7202      | 655.8637         | 12 |
| 3  | 286.1761  | 143.5917        |                |                  | 268.1656       | 134.5864         | S    | 1215.6467 | 608.3270        | 1198.6202      | 599.8137         | 1197.6361      | 599.3217         | 11 |
| 4  | 387.2238  | 194.1155        |                |                  | 369.2132       | 185.1103         | T    | 1128.6147 | 564.8110        | 1111.5881      | 556.2977         | 1110.6041      | 555.8057         | 10 |
| 5  | 484.2766  | 242.6419        |                |                  | 466.2660       | 233.6366         | P    | 1027.5670 | 514.2871        | 1010.5405      | 505.7739         | 1009.5564      | 505.2819         | 9  |
| 6  | 613.3192  | 307.1632        |                |                  | 595.3086       | 298.1579         | E    | 930.5142  | 465.7608        | 913.4877       | 457.2475         | 912.5037       | 456.7555         | 8  |
| 7  | 742.3618  | 371.6845        |                |                  | 724.3512       | 362.6792         | E    | 801.4716  | 401.2395        | 784.4451       | 392.7262         | 783.4611       | 392.2342         | 7  |
| 8  | 855.4458  | 428.2266        |                |                  | 837.4353       | 419.2213         | L    | 672.4291  | 336.7182        | 655.4025       | 328.2049         | 654.4185       | 327.7129         | 6  |
| 9  | 912.4673  | 456.7373        |                |                  | 894.4567       | 447.7320         | G    | 559.3450  | 280.1761        | 542.3184       | 271.6629         | 541.3344       | 271.1709         | 5  |
| 10 | 1025.5514 | 513.2793        |                |                  | 1007.5408      | 504.2740         | L    | 502.3235  | 251.6654        | 485.2970       | 243.1521         | 484.3130       | 242.6601         | 4  |
| 11 | 1140.5783 | 570.7928        |                |                  | 1122.5677      | 561.7875         | D    | 389.2395  | 195.1234        | 372.2129       | 186.6101         | 371.2289       | 186.1181         | 3  |
| 12 | 1296.7046 | 648.8559        | 1279.6780      | 640.3426         | 1278.6940      | 639.8506         | K    | 274.2125  | 137.6099        | 257.1860       | 129.0966         |                |                  | 2  |
| 13 |           |                 |                |                  |                |                  | V    | 118.0863  | 59.5468         |                |                  |                |                  | 1  |

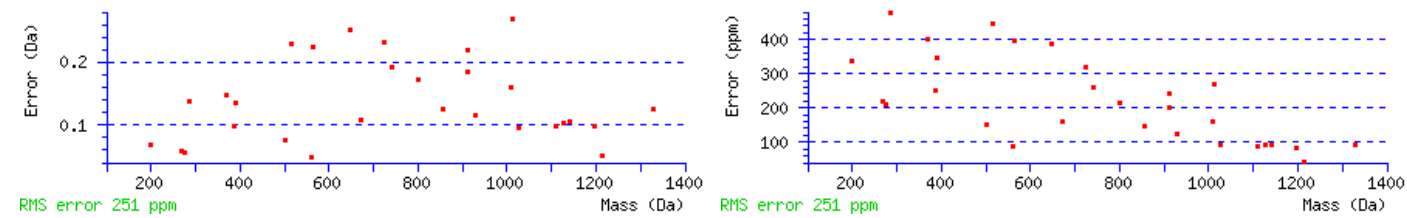

NCBI **BLAST** search of [GISTPEELGLDKV](#)  
(Parameters: blastp, nr protein database, expect=20000, no filter, PAM30)  
Other BLAST [web gateways](#)

All matches to this query

| Score | Mr(calc)  | Delta   | Sequence                        |
|-------|-----------|---------|---------------------------------|
| 66.4  | 1412.7763 | 0.0025  | <a href="#">GISTPEELGLDKV</a>   |
| 32.0  | 1412.8429 | -0.0641 | <a href="#">SPGLDGLLDLLLGV</a>  |
| 30.3  | 1412.8279 | -0.0492 | <a href="#">AVSTPAGLITPIVF</a>  |
| 25.7  | 1412.7925 | -0.0138 | <a href="#">RPTPVNSATAALPS</a>  |
| 25.0  | 1412.7623 | 0.0164  | <a href="#">LGTSGRAALGSVEPA</a> |
| 24.9  | 1412.8239 | -0.0451 | <a href="#">GLSGLLKLDSLQN</a>   |
| 24.1  | 1412.7875 | -0.0088 | <a href="#">QSGSEGKVKPDK</a>    |
| 24.0  | 1412.6857 | 0.0930  | <a href="#">GIECQEELPAPSL</a>   |
| 23.6  | 1412.6969 | 0.0818  | <a href="#">QETLELIQHMQ</a>     |
| 23.6  | 1412.7299 | 0.0488  | <a href="#">TNTATLLRYYQ</a>     |

Mascot: <http://www.matrixscience.com/>

# Mascot Search Results

## Peptide View

MS/MS Fragmentation of **NDFASAVRILEV**  
Found in **COX5A\_MOUSE** in **SwissProt**, Cytochrome c oxidase subunit 5A, mitochondrial OS=Mus musculus GN=Cox5a PE=1 SV=2  
Match to Query 4207: 1360.736888 from(681.375720,2+) intensity(31020.1310) scans(11202) rawscans(sn11202) rtinseconds(4184.7178) index(8301)  
Title: 8302: Scan 11202 (rt=4184.72) [C:\Users\Administrador\Desktop\AMOSTRAS NO ORBITRAP LEANDRO RODAR NOVAMENTE\HIPOCAMPO\hipocampo\_01.raw]  
Data file hipocampo\_01.temp.mgf

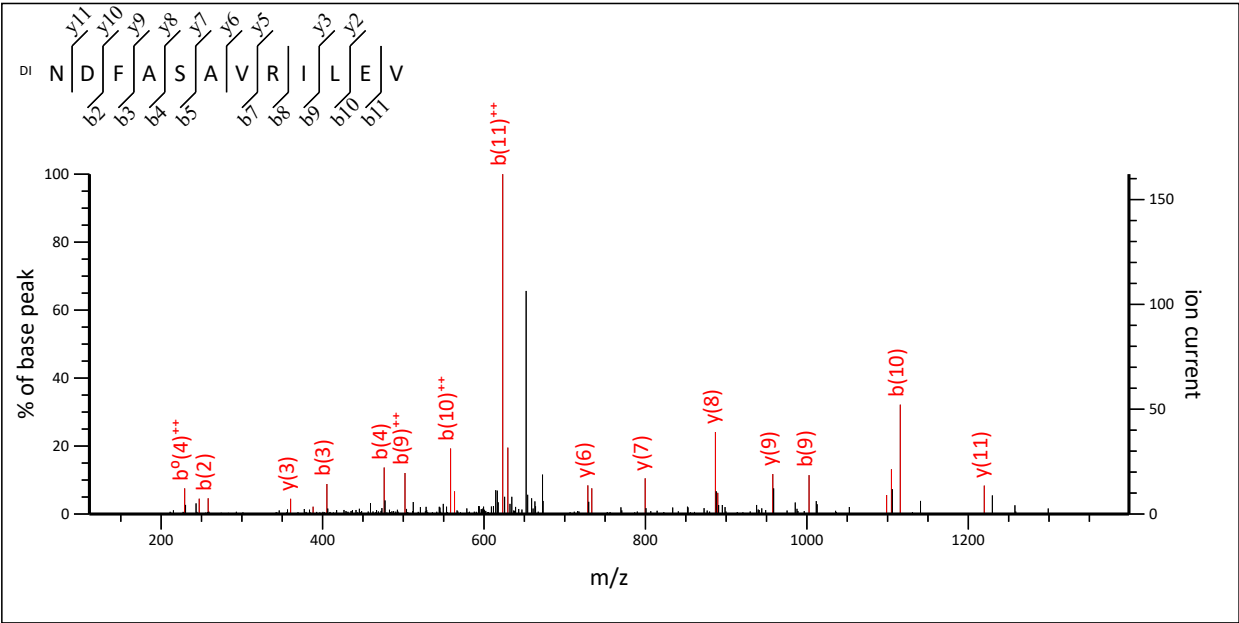

111.14 to 1399.02

Label all possible matches ☐ Label matches used for scoring ☒

Monoisotopic mass of neutral peptide Mr(calc): 1360.7350  
Variable modifications:  
N-term : Dimethyl (N-term)  
Ions Score: 70 Expect: 0.0027  
Matches : 24/120 fragment ions using 33 most intense peaks ([help](#))

| #  | b         | b <sup>++</sup> | b <sup>*</sup> | b <sup>+++</sup> | b <sup>0</sup> | b <sup>0++</sup> | Seq. | y         | y <sup>++</sup> | y <sup>*</sup> | y <sup>+++</sup> | y <sup>0</sup> | y <sup>0++</sup> | #  |
|----|-----------|-----------------|----------------|------------------|----------------|------------------|------|-----------|-----------------|----------------|------------------|----------------|------------------|----|
| 1  | 143.0815  | 72.0444         | 126.0550       | 63.5311          |                |                  | N    |           |                 |                |                  |                |                  | 12 |
| 2  | 258.1084  | 129.5579        | 241.0819       | 121.0446         | 240.0979       | 120.5526         | D    | 1219.6681 | 610.3377        | 1202.6416      | 601.8244         | 1201.6575      | 601.3324         | 11 |
| 3  | 405.1769  | 203.0921        | 388.1503       | 194.5788         | 387.1663       | 194.0868         | F    | 1104.6412 | 552.8242        | 1087.6146      | 544.3109         | 1086.6306      | 543.8189         | 10 |
| 4  | 476.2140  | 238.6106        | 459.1874       | 230.0974         | 458.2034       | 229.6053         | A    | 957.5728  | 479.2900        | 940.5462       | 470.7767         | 939.5622       | 470.2847         | 9  |
| 5  | 563.2460  | 282.1266        | 546.2195       | 273.6134         | 545.2354       | 273.1214         | S    | 886.5356  | 443.7715        | 869.5091       | 435.2582         | 868.5251       | 434.7662         | 8  |
| 6  | 634.2831  | 317.6452        | 617.2566       | 309.1319         | 616.2726       | 308.6399         | A    | 799.5036  | 400.2554        | 782.4771       | 391.7422         | 781.4931       | 391.2502         | 7  |
| 7  | 733.3515  | 367.1794        | 716.3250       | 358.6661         | 715.3410       | 358.1741         | V    | 728.4665  | 364.7369        | 711.4400       | 356.2236         | 710.4559       | 355.7316         | 6  |
| 8  | 889.4526  | 445.2300        | 872.4261       | 436.7167         | 871.4421       | 436.2247         | R    | 629.3981  | 315.2027        | 612.3715       | 306.6894         | 611.3875       | 306.1974         | 5  |
| 9  | 1002.5367 | 501.7720        | 985.5102       | 493.2587         | 984.5261       | 492.7667         | I    | 473.2970  | 237.1521        |                |                  | 455.2864       | 228.1468         | 4  |
| 10 | 1115.6208 | 558.3140        | 1098.5942      | 549.8007         | 1097.6102      | 549.3087         | L    | 360.2129  | 180.6101        |                |                  | 342.2023       | 171.6048         | 3  |
| 11 | 1244.6634 | 622.8353        | 1227.6368      | 614.3220         | 1226.6528      | 613.8300         | E    | 247.1288  | 124.0681        |                |                  | 229.1183       | 115.0628         | 2  |
| 12 |           |                 |                |                  |                |                  | V    | 118.0863  | 59.5468         |                |                  |                |                  | 1  |

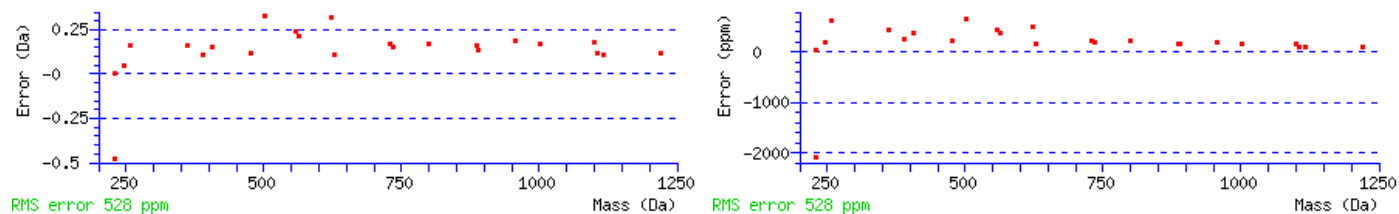

NCBI **BLAST** search of [NDFASAVRILEV](#)

(Parameters: blastp, nr protein database, expect=20000, no filter, PAM30)

Other BLAST [web gateways](#)

#### All matches to this query

| Score | Mr(calc)  | Delta   | Sequence                       |
|-------|-----------|---------|--------------------------------|
| 70.5  | 1360.7350 | 0.0018  | <a href="#">NDFASAVRILEV</a>   |
| 31.9  | 1360.8417 | -0.1048 | <a href="#">GPETVLQSAIKL</a>   |
| 27.8  | 1360.5825 | 0.1544  | <a href="#">NMMASIQSFSAM</a>   |
| 26.2  | 1360.7322 | 0.0047  | <a href="#">ATLAPTTRAMAPA</a>  |
| 26.1  | 1360.8417 | -0.1048 | <a href="#">KDNIGVAVVLEV</a>   |
| 23.8  | 1360.7380 | -0.0011 | <a href="#">VINAAPGAQGGTEV</a> |
| 23.8  | 1360.6519 | 0.0849  | <a href="#">NPGPMVVFATPGM</a>  |
| 23.0  | 1360.6408 | 0.0960  | <a href="#">SQDASSRPDPEV</a>   |
| 22.6  | 1360.8166 | -0.0797 | <a href="#">APGVQKALGAGTEV</a> |
| 22.4  | 1360.6097 | 0.1272  | <a href="#">TLDEMDSAASDL</a>   |

Mascot: <http://www.matrixscience.com/>

Mascot Search Results

Peptide View

MS/MS Fragmentation of **RPTLNELGISTPEELGLDKV**  
Found in **COX5A\_MOUSE** in **SwissProt**, Cytochrome c oxidase subunit 5A, mitochondrial OS=Mus musculus GN=Cox5a PE=1 SV=2

Match to Query 8645: 2244.298632 from(749.106820,3+) intensity(31536.9790) scans(10331) rawscans(sn10331) rtinseconds(3866.6548) index(7546)  
Title: 7547: Scan 10331 (rt=3866.65) [C:\Users\Administrador\Desktop\AMOSTRAS NO ORBITRAP LEANDRO RODAR NOVAMENTE\HIPOCAMPO\hipocampo\_01.raw]  
Data file hipocampo\_01.temp.mgf

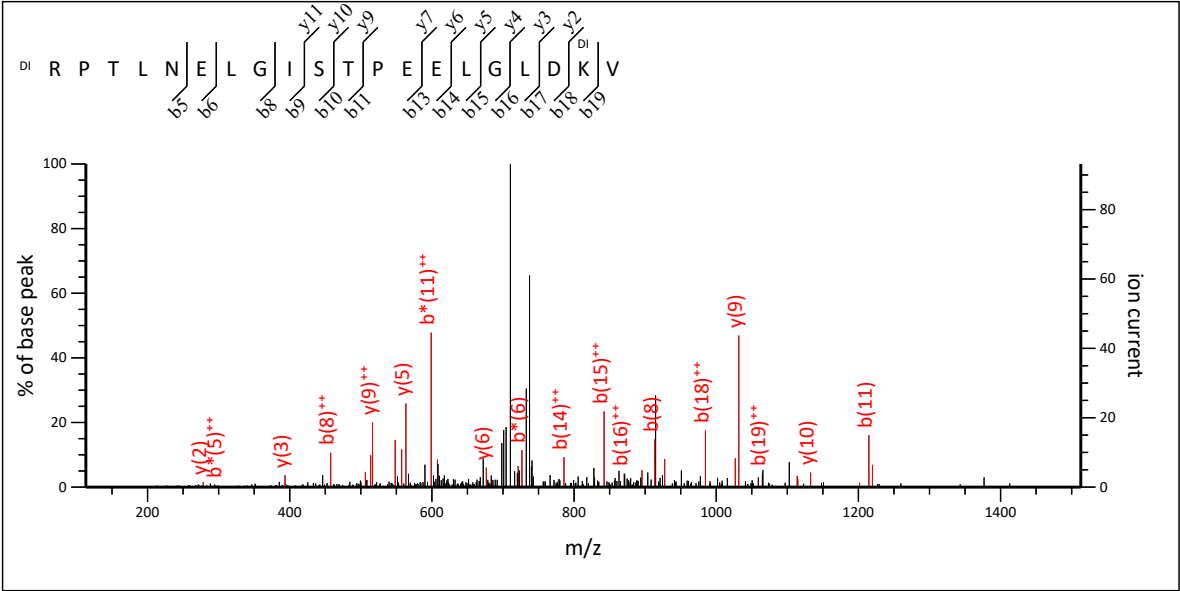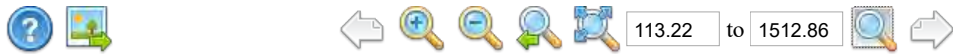

Label all possible matches ☐ Label matches used for scoring ☒

Monoisotopic mass of neutral peptide Mr(calc): 2244.2817  
Variable modifications:  
N-term : Dimethyl:2H(4) (N-term)  
K19 : Dimethyl:2H(4) (K)  
Ions Score: 42 Expect: 2.3  
Matches : 38/218 fragment ions using 78 most intense peaks ([help](#))

| #  | b         | b <sup>++</sup> | b <sup>*</sup> | b <sup>++</sup> * | b <sup>0</sup> | b <sup>0++</sup> | Seq. | y         | y <sup>++</sup> | y <sup>*</sup> | y <sup>++</sup> * | y <sup>0</sup> | y <sup>0++</sup> | #  |
|----|-----------|-----------------|----------------|-------------------|----------------|------------------|------|-----------|-----------------|----------------|-------------------|----------------|------------------|----|
| 1  | 189.1648  | 95.0860         | 172.1382       | 86.5728           |                |                  | R    |           |                 |                |                   |                |                  | 20 |
| 2  | 286.2176  | 143.6124        | 269.1910       | 135.0991          |                |                  | P    | 2057.1314 | 1029.0694       | 2040.1049      | 1020.5561         | 2039.1209      | 1020.0641        | 19 |
| 3  | 387.2652  | 194.1363        | 370.2387       | 185.6230          | 369.2547       | 185.1310         | T    | 1960.0787 | 980.5430        | 1943.0521      | 972.0297          | 1942.0681      | 971.5377         | 18 |
| 4  | 500.3493  | 250.6783        | 483.3228       | 242.1650          | 482.3387       | 241.6730         | L    | 1859.0310 | 930.0191        | 1842.0044      | 921.5059          | 1841.0204      | 921.0139         | 17 |
| 5  | 614.3922  | 307.6998        | 597.3657       | 299.1865          | 596.3817       | 298.6945         | N    | 1745.9469 | 873.4771        | 1728.9204      | 864.9638          | 1727.9364      | 864.4718         | 16 |
| 6  | 743.4348  | 372.2210        | 726.4083       | 363.7078          | 725.4243       | 363.2158         | E    | 1631.9040 | 816.4556        | 1614.8775      | 807.9424          | 1613.8934      | 807.4504         | 15 |
| 7  | 856.5189  | 428.7631        | 839.4923       | 420.2498          | 838.5083       | 419.7578         | L    | 1502.8614 | 751.9343        | 1485.8349      | 743.4211          | 1484.8508      | 742.9291         | 14 |
| 8  | 913.5403  | 457.2738        | 896.5138       | 448.7605          | 895.5298       | 448.2685         | G    | 1389.7773 | 695.3923        | 1372.7508      | 686.8790          | 1371.7668      | 686.3870         | 13 |
| 9  | 1026.6244 | 513.8158        | 1009.5979      | 505.3026          | 1008.6138      | 504.8106         | I    | 1332.7559 | 666.8816        | 1315.7293      | 658.3683          | 1314.7453      | 657.8763         | 12 |
| 10 | 1113.6564 | 557.3319        | 1096.6299      | 548.8186          | 1095.6459      | 548.3266         | S    | 1219.6718 | 610.3395        | 1202.6453      | 601.8263          | 1201.6613      | 601.3343         | 11 |
| 11 | 1214.7041 | 607.8557        | 1197.6776      | 599.3424          | 1196.6936      | 598.8504         | T    | 1132.6398 | 566.8235        | 1115.6132      | 558.3103          | 1114.6292      | 557.8183         | 10 |
| 12 | 1311.7569 | 656.3821        | 1294.7303      | 647.8688          | 1293.7463      | 647.3768         | P    | 1031.5921 | 516.2997        | 1014.5656      | 507.7864          | 1013.5815      | 507.2944         | 9  |
| 13 | 1440.7995 | 720.9034        | 1423.7729      | 712.3901          | 1422.7889      | 711.8981         | E    | 934.5393  | 467.7733        | 917.5128       | 459.2600          | 916.5288       | 458.7680         | 8  |
| 14 | 1569.8421 | 785.4247        | 1552.8155      | 776.9114          | 1551.8315      | 776.4194         | E    | 805.4968  | 403.2520        | 788.4702       | 394.7387          | 787.4862       | 394.2467         | 7  |
| 15 | 1682.9261 | 841.9667        | 1665.8996      | 833.4534          | 1664.9156      | 832.9614         | L    | 676.4542  | 338.7307        | 659.4276       | 330.2174          | 658.4436       | 329.7254         | 6  |
| 16 | 1739.9476 | 870.4774        | 1722.9210      | 861.9642          | 1721.9370      | 861.4722         | G    | 563.3701  | 282.1887        | 546.3435       | 273.6754          | 545.3595       | 273.1834         | 5  |
| 17 | 1853.0317 | 927.0195        | 1836.0051      | 918.5062          | 1835.0211      | 918.0142         | L    | 506.3486  | 253.6780        | 489.3221       | 245.1647          | 488.3381       | 244.6727         | 4  |
| 18 | 1968.0586 | 984.5329        | 1951.0321      | 976.0197          | 1950.0480      | 975.5277         | D    | 393.2646  | 197.1359        | 376.2380       | 188.6226          | 375.2540       | 188.1306         | 3  |
| 19 | 2128.2100 | 1064.6086       | 2111.1834      | 1056.0954         | 2110.1994      | 1055.6033        | K    | 278.2376  | 139.6225        | 261.2111       | 131.1092          |                |                  | 2  |
| 20 |           |                 |                |                   |                |                  | V    | 118.0863  | 59.5468         |                |                   |                |                  | 1  |

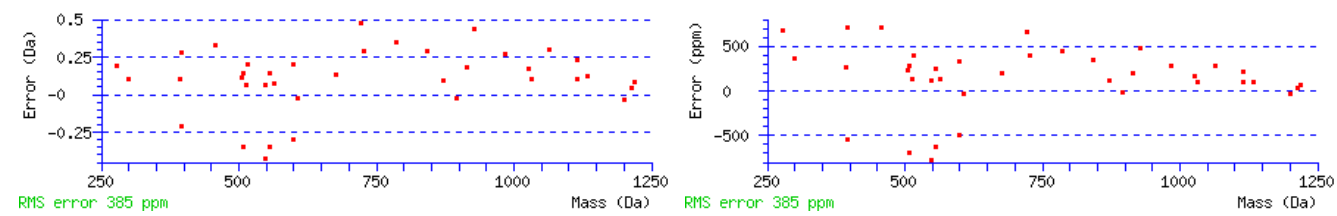

NCBI BLAST search of [RPTLNELGISTPEELGLDKV](#)  
(Parameters: blastp, nr protein database, expect=20000, no filter, PAM30)  
Other BLAST [web gateways](#)

All matches to this query

| Score | Mr(calc)  | Delta   | Sequence                              |
|-------|-----------|---------|---------------------------------------|
| 41.6  | 2244.2817 | 0.0170  | <a href="#">RPTLNELGISTPEELGLDKV</a>  |
| 18.0  | 2244.3293 | -0.0307 | <a href="#">LSAKGQLTNIVSPTAATTPRI</a> |
| 17.3  | 2243.9274 | 0.3712  | <a href="#">MMESHSSNSNGTEMVSQPSH</a>  |
| 15.6  | 2244.1007 | 0.1979  | <a href="#">AENGHQMAAETAIQRPNVPH</a>  |
| 15.1  | 2244.1517 | 0.1469  | <a href="#">ARGFGLWEGALYEIGGLFGTG</a> |
| 14.6  | 2244.1462 | 0.1524  | <a href="#">EDTMYPLIALVVIFFGMSL</a>   |
| 14.1  | 2244.2676 | 0.0310  | <a href="#">SLDATPSPETTSLSQTKKMTI</a> |
| 13.6  | 2244.0580 | 0.2406  | <a href="#">VCPGIAADSPSSTDSPQNKEV</a> |
| 12.8  | 2244.0220 | 0.2766  | <a href="#">LMSPMTSGEMSMPLMKTPS</a>   |
| 12.4  | 2244.0775 | 0.2211  | <a href="#">LVHGLTLVGTASNPCGVMMQM</a> |

Mascot: <http://www.matrixscience.com/>



Mascot Search Results

Peptide View

MS/MS Fragmentation of **FHNPHVNPLPTGYEDE**  
Found in **CX6A1\_MOUSE** in **SwissProt**, Cytochrome c oxidase subunit 6A1, mitochondrial OS=Mus musculus GN=Cox6a1 PE=1 SV=2

Match to Query 7128: 1892.874028 from(947.444290,2+) intensity(60708.2460) scans(5788) rawscans(sn5788) rtinseconds(2254.0558) index(3711)

Title: 3712: Scan 5788 (rt=2254.06) [C:\Users\Administrador\Desktop\AMOSTRAS NO ORBITRAP LEANDRO RODAR NOVAMENTE\HIPOCAMPO\hipocampo\_01.raw]

Data file hipocampo\_01.temp.mgf

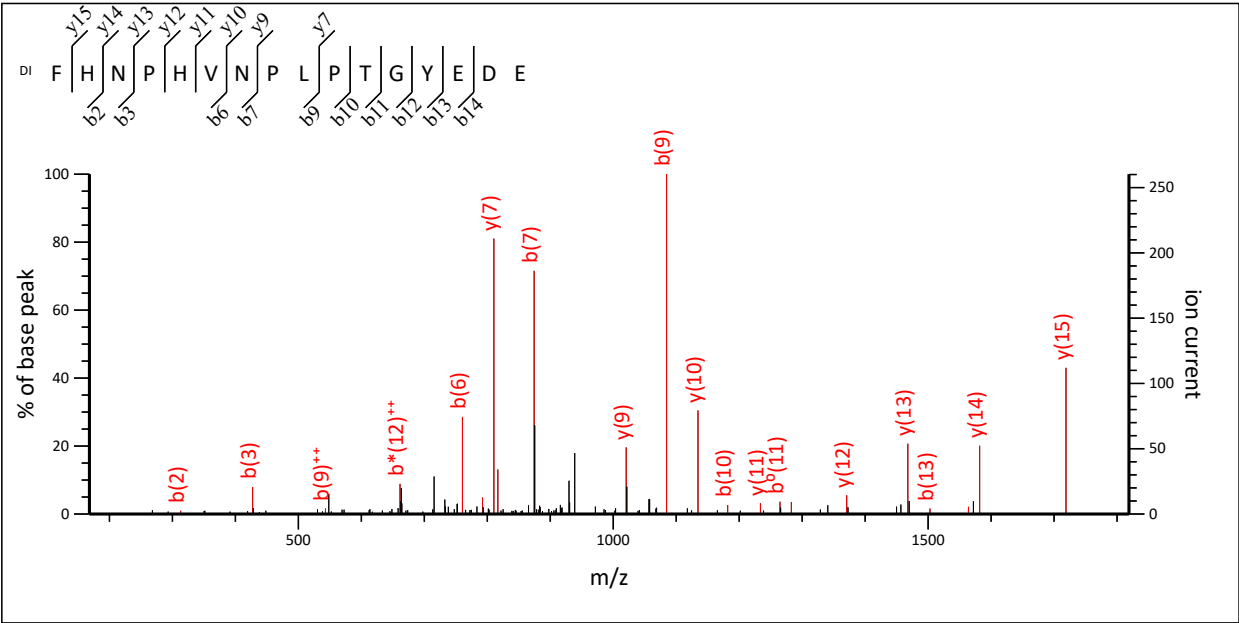

168.2 to 1818.91

Label all possible matches ☐ Label matches used for scoring ☒

Monoisotopic mass of neutral peptide Mr(calc): 1892.8693  
Variable modifications:  
N-term : Dimethyl (N-term)  
Ions Score: 55 Expect: 0.11  
Matches : 25/138 fragment ions using 42 most intense peaks ([help](#))

| #  | b         | b <sup>++</sup> | b <sup>*</sup> | b <sup>+++</sup> | b <sup>0</sup> | b <sup>0++</sup> | Seq. | y         | y <sup>++</sup> | y <sup>*</sup> | y <sup>+++</sup> | y <sup>0</sup> | y <sup>0++</sup> | #  |
|----|-----------|-----------------|----------------|------------------|----------------|------------------|------|-----------|-----------------|----------------|------------------|----------------|------------------|----|
| 1  | 176.1070  | 88.5571         |                |                  |                |                  | F    |           |                 |                |                  |                |                  | 16 |
| 2  | 313.1659  | 157.0866        |                |                  |                |                  | H    | 1718.7769 | 859.8921        | 1701.7503      | 851.3788         | 1700.7663      | 850.8868         | 15 |
| 3  | 427.2088  | 214.1081        | 410.1823       | 205.5948         |                |                  | N    | 1581.7180 | 791.3626        | 1564.6914      | 782.8494         | 1563.7074      | 782.3573         | 14 |
| 4  | 524.2616  | 262.6344        | 507.2350       | 254.1212         |                |                  | P    | 1467.6751 | 734.3412        | 1450.6485      | 725.8279         | 1449.6645      | 725.3359         | 13 |
| 5  | 661.3205  | 331.1639        | 644.2940       | 322.6506         |                |                  | H    | 1370.6223 | 685.8148        | 1353.5957      | 677.3015         | 1352.6117      | 676.8095         | 12 |
| 6  | 760.3889  | 380.6981        | 743.3624       | 372.1848         |                |                  | V    | 1233.5634 | 617.2853        | 1216.5368      | 608.7721         | 1215.5528      | 608.2800         | 11 |
| 7  | 874.4318  | 437.7196        | 857.4053       | 429.2063         |                |                  | N    | 1134.4950 | 567.7511        | 1117.4684      | 559.2378         | 1116.4844      | 558.7458         | 10 |
| 8  | 971.4846  | 486.2459        | 954.4581       | 477.7327         |                |                  | P    | 1020.4520 | 510.7297        |                |                  | 1002.4415      | 501.7244         | 9  |
| 9  | 1084.5687 | 542.7880        | 1067.5421      | 534.2747         |                |                  | L    | 923.3993  | 462.2033        |                |                  | 905.3887       | 453.1980         | 8  |
| 10 | 1181.6214 | 591.3144        | 1164.5949      | 582.8011         |                |                  | P    | 810.3152  | 405.6612        |                |                  | 792.3046       | 396.6560         | 7  |
| 11 | 1282.6691 | 641.8382        | 1265.6426      | 633.3249         | 1264.6586      | 632.8329         | T    | 713.2624  | 357.1349        |                |                  | 695.2519       | 348.1296         | 6  |
| 12 | 1339.6906 | 670.3489        | 1322.6640      | 661.8357         | 1321.6800      | 661.3436         | G    | 612.2148  | 306.6110        |                |                  | 594.2042       | 297.6057         | 5  |
| 13 | 1502.7539 | 751.8806        | 1485.7274      | 743.3673         | 1484.7433      | 742.8753         | Y    | 555.1933  | 278.1003        |                |                  | 537.1827       | 269.0950         | 4  |
| 14 | 1631.7965 | 816.4019        | 1614.7700      | 807.8886         | 1613.7859      | 807.3966         | E    | 392.1300  | 196.5686        |                |                  | 374.1194       | 187.5633         | 3  |
| 15 | 1746.8234 | 873.9154        | 1729.7969      | 865.4021         | 1728.8129      | 864.9101         | D    | 263.0874  | 132.0473        |                |                  | 245.0768       | 123.0420         | 2  |
| 16 |           |                 |                |                  |                |                  | E    | 148.0604  | 74.5339         |                |                  | 130.0499       | 65.5286          | 1  |

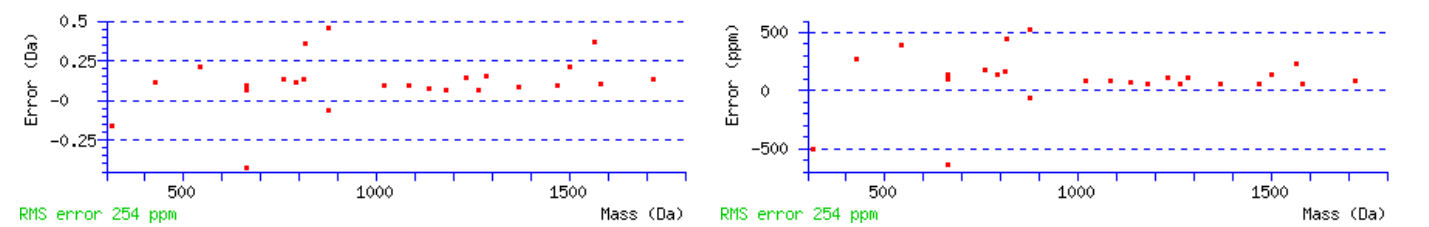

NCBI **BLAST** search of [FHNPHVNPLPTGYEDE](#)  
(Parameters: blastp, nr protein database, expect=20000, no filter, PAM30)  
Other BLAST [web gateways](#)

All matches to this query

| Score | Mr(calc)  | Delta   | Sequence                          |
|-------|-----------|---------|-----------------------------------|
| 54.7  | 1892.8693 | 0.0047  | <a href="#">FHNPHVNPLPTGYEDE</a>  |
| 16.7  | 1893.0683 | -0.1943 | <a href="#">LREIQELGQLIQAVQQ</a>  |
| 15.7  | 1892.8102 | 0.0638  | <a href="#">NEFYGLNFTCGGSNTSM</a> |
| 15.1  | 1892.9576 | -0.0835 | <a href="#">TEREIVNDFREKMM</a>    |
| 14.9  | 1892.7746 | 0.0994  | <a href="#">NLMFGDYMNPDLEGDD</a>  |
| 14.6  | 1892.8549 | 0.0191  | <a href="#">EATHCTPLPAQHFQMP</a>  |
| 14.1  | 1893.1335 | -0.2594 | <a href="#">HVVLRRINNVHVKMD</a>   |
| 13.7  | 1892.7246 | 0.1494  | <a href="#">SEDEDEPDMKCDDMM</a>   |
| 13.5  | 1893.1222 | -0.2482 | <a href="#">KSMHLGRLPSRPPLPGS</a> |
| 13.5  | 1892.7828 | 0.0912  | <a href="#">AGALAQDEYEEDSSDEE</a> |

Mascot: <http://www.matrixscience.com/>

Mascot Search Results

Peptide View

MS/MS Fragmentation of **HNP HVNPLPTGYEDE**  
Found in **CX6A1\_MOUSE** in **SwissProt**, Cytochrome c oxidase subunit 6A1, mitochondrial OS=Mus musculus GN=Cox6a1 PE=1 SV=2

Match to Query 6391: 1745.804808 from(873.909680,2+) intensity(84828.5230) scans(4888) rawscans(sn4888) rtinseconds(1960.3945) index(2914)

Title: 2915: Scan 4888 (rt=1960.39) [C:\Users\Administrador\Desktop\AMOSTRAS NO ORBITRAP LEANDRO RODAR NOVAMENTE\HIPOCAMPO\hipocampo\_01.raw]

Data file hipocampo\_01.temp.mgf

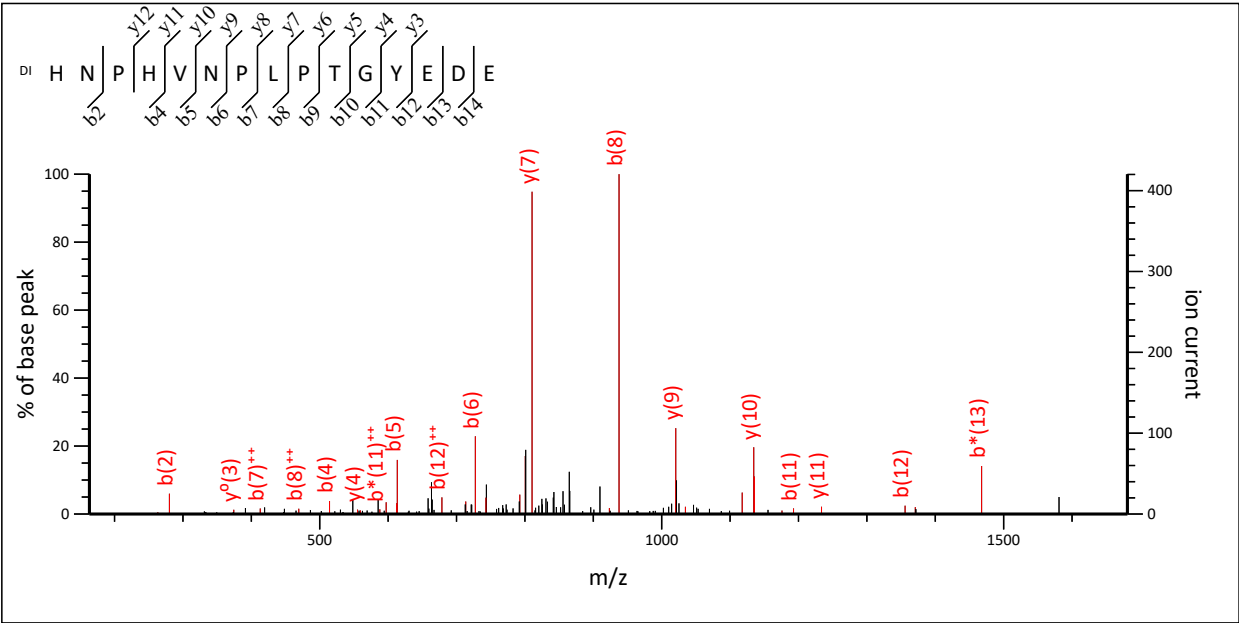

163.27 to 1680.94

Label all possible matches ☐ Label matches used for scoring ☒

Monoisotopic mass of neutral peptide Mr(calc): 1745.8009  
Variable modifications:  
N-term : Dimethyl (N-term)  
Ions Score: 61 Expect: 0.023  
Matches : 38/130 fragment ions using 69 most intense peaks ([help](#))

| #  | b         | b <sup>++</sup> | b <sup>*</sup> | b <sup>+++</sup> | b <sup>0</sup> | b <sup>0++</sup> | Seq. | y         | y <sup>++</sup> | y <sup>*</sup> | y <sup>+++</sup> | y <sup>0</sup> | y <sup>0++</sup> | #  |
|----|-----------|-----------------|----------------|------------------|----------------|------------------|------|-----------|-----------------|----------------|------------------|----------------|------------------|----|
| 1  | 166.0975  | 83.5524         |                |                  |                |                  | H    |           |                 |                |                  |                |                  | 15 |
| 2  | 280.1404  | 140.5738        | 263.1139       | 132.0606         |                |                  | N    | 1581.7180 | 791.3626        | 1564.6914      | 782.8494         | 1563.7074      | 782.3573         | 14 |
| 3  | 377.1932  | 189.1002        | 360.1666       | 180.5870         |                |                  | P    | 1467.6751 | 734.3412        | 1450.6485      | 725.8279         | 1449.6645      | 725.3359         | 13 |
| 4  | 514.2521  | 257.6297        | 497.2255       | 249.1164         |                |                  | H    | 1370.6223 | 685.8148        | 1353.5957      | 677.3015         | 1352.6117      | 676.8095         | 12 |
| 5  | 613.3205  | 307.1639        | 596.2940       | 298.6506         |                |                  | V    | 1233.5634 | 617.2853        | 1216.5368      | 608.7721         | 1215.5528      | 608.2800         | 11 |
| 6  | 727.3634  | 364.1854        | 710.3369       | 355.6721         |                |                  | N    | 1134.4950 | 567.7511        | 1117.4684      | 559.2378         | 1116.4844      | 558.7458         | 10 |
| 7  | 824.4162  | 412.7117        | 807.3896       | 404.1985         |                |                  | P    | 1020.4520 | 510.7297        |                |                  | 1002.4415      | 501.7244         | 9  |
| 8  | 937.5003  | 469.2538        | 920.4737       | 460.7405         |                |                  | L    | 923.3993  | 462.2033        |                |                  | 905.3887       | 453.1980         | 8  |
| 9  | 1034.5530 | 517.7802        | 1017.5265      | 509.2669         |                |                  | P    | 810.3152  | 405.6612        |                |                  | 792.3046       | 396.6560         | 7  |
| 10 | 1135.6007 | 568.3040        | 1118.5742      | 559.7907         | 1117.5901      | 559.2987         | T    | 713.2624  | 357.1349        |                |                  | 695.2519       | 348.1296         | 6  |
| 11 | 1192.6222 | 596.8147        | 1175.5956      | 588.3014         | 1174.6116      | 587.8094         | G    | 612.2148  | 306.6110        |                |                  | 594.2042       | 297.6057         | 5  |
| 12 | 1355.6855 | 678.3464        | 1338.6589      | 669.8331         | 1337.6749      | 669.3411         | Y    | 555.1933  | 278.1003        |                |                  | 537.1827       | 269.0950         | 4  |
| 13 | 1484.7281 | 742.8677        | 1467.7015      | 734.3544         | 1466.7175      | 733.8624         | E    | 392.1300  | 196.5686        |                |                  | 374.1194       | 187.5633         | 3  |
| 14 | 1599.7550 | 800.3812        | 1582.7285      | 791.8679         | 1581.7445      | 791.3759         | D    | 263.0874  | 132.0473        |                |                  | 245.0768       | 123.0420         | 2  |
| 15 |           |                 |                |                  |                |                  | E    | 148.0604  | 74.5339         |                |                  | 130.0499       | 65.5286          | 1  |

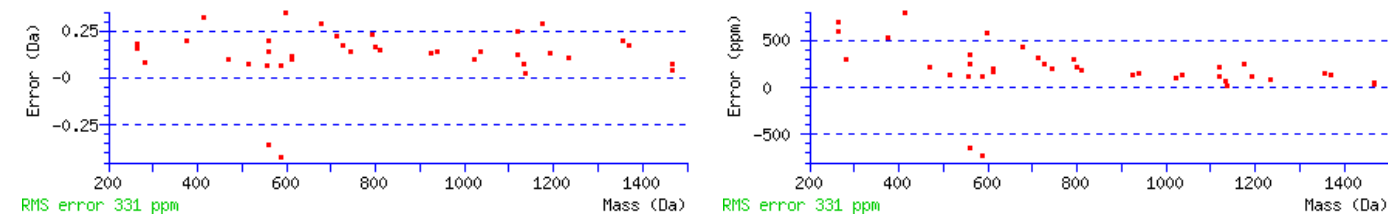

NCBI BLAST search of [HNPHVNPLPTYEDE](#)  
(Parameters: blastp, nr protein database, expect=20000, no filter, PAM30)  
Other BLAST [web gateways](#)

All matches to this query

| Score | Mr(calc)  | Delta   | Sequence                          |
|-------|-----------|---------|-----------------------------------|
| 61.4  | 1745.8009 | 0.0039  | <a href="#">HNPHVNPLPTYEDE</a>    |
| 20.5  | 1745.9098 | -0.1050 | <a href="#">IGLHGGRPLQDMVGMGG</a> |
| 17.4  | 1745.8723 | -0.0675 | <a href="#">KTGIDNPIFDTEEGI</a>   |
| 15.8  | 1745.9272 | -0.1224 | <a href="#">QAKYGDRHAMKQSD</a>    |
| 14.8  | 1746.0254 | -0.2206 | <a href="#">SHRMFDSTAKSFPK</a>    |
| 14.2  | 1745.8680 | -0.0632 | <a href="#">IFEVGKNGGSSCPECR</a>  |
| 14.1  | 1745.7171 | 0.0877  | <a href="#">DGMHQNLPPMERDM</a>    |
| 13.8  | 1745.8266 | -0.0218 | <a href="#">TMSEAELPLGFSRMN</a>   |
| 13.8  | 1745.9109 | -0.1061 | <a href="#">LDASDEFLKERVVN</a>    |
| 13.5  | 1745.8869 | -0.0821 | <a href="#">GKQLTRLRLMEEDE</a>    |

Mascot: <http://www.matrixscience.com/>

Mascot Search Results

Peptide View

MS/MS Fragmentation of **NPHVNPLPTGYEDE**  
Found in **CX6A1\_MOUSE** in **SwissProt**, Cytochrome c oxidase subunit 6A1, mitochondrial OS=Mus musculus GN=Cox6a1 PE=1 SV=2

Match to Query 5578: 1608.746608 from(805.380580,2+) intensity(42224.8050) scans(5737) rawscans(sn5737) rtinseconds(2237.191) index(3665)

Title: 3666: Scan 5737 (rt=2237.19) [C:\Users\Administrador\Desktop\AMOSTRAS NO ORBITRAP LEANDRO RODAR NOVAMENTE\HIPOCAMPO\hipocampo\_01.raw]

Data file hipocampo\_01.temp.mgf

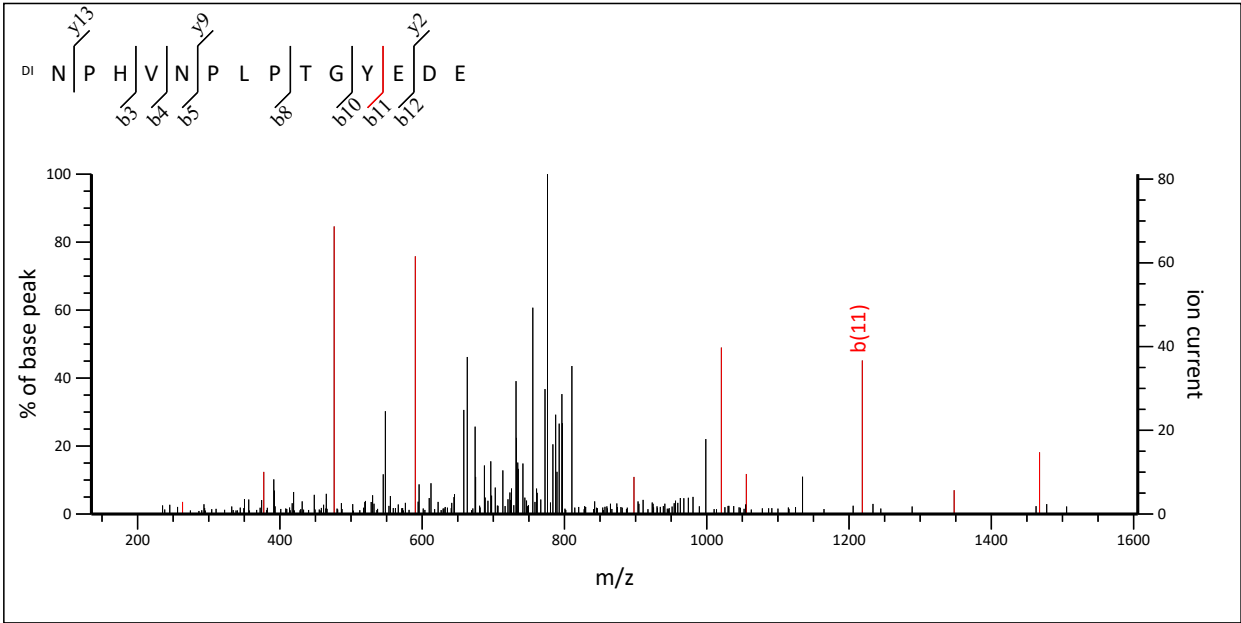

135.11 to 1605.82

Label all possible matches ☐ Label matches used for scoring ☒

Monoisotopic mass of neutral peptide Mr(calc): 1608.7420  
Variable modifications:  
N-term : Dimethyl (N-term)  
Ions Score: 53 Expect: 0.17  
Matches : 10/122 fragment ions using 13 most intense peaks ([help](#))

| #  | b         | b <sup>++</sup> | b <sup>*</sup> | b <sup>+++</sup> | b <sup>0</sup> | b <sup>0++</sup> | Seq. | y         | y <sup>++</sup> | y <sup>*</sup> | y <sup>+++</sup> | y <sup>0</sup> | y <sup>0++</sup> | #  |
|----|-----------|-----------------|----------------|------------------|----------------|------------------|------|-----------|-----------------|----------------|------------------|----------------|------------------|----|
| 1  | 143.0815  | 72.0444         | 126.0550       | 63.5311          |                |                  | N    |           |                 |                |                  |                |                  | 14 |
| 2  | 240.1343  | 120.5708        | 223.1077       | 112.0575         |                |                  | P    | 1467.6751 | 734.3412        | 1450.6485      | 725.8279         | 1449.6645      | 725.3359         | 13 |
| 3  | 377.1932  | 189.1002        | 360.1666       | 180.5870         |                |                  | H    | 1370.6223 | 685.8148        | 1353.5957      | 677.3015         | 1352.6117      | 676.8095         | 12 |
| 4  | 476.2616  | 238.6344        | 459.2350       | 230.1212         |                |                  | V    | 1233.5634 | 617.2853        | 1216.5368      | 608.7721         | 1215.5528      | 608.2800         | 11 |
| 5  | 590.3045  | 295.6559        | 573.2780       | 287.1426         |                |                  | N    | 1134.4950 | 567.7511        | 1117.4684      | 559.2378         | 1116.4844      | 558.7458         | 10 |
| 6  | 687.3573  | 344.1823        | 670.3307       | 335.6690         |                |                  | P    | 1020.4520 | 510.7297        |                |                  | 1002.4415      | 501.7244         | 9  |
| 7  | 800.4413  | 400.7243        | 783.4148       | 392.2110         |                |                  | L    | 923.3993  | 462.2033        |                |                  | 905.3887       | 453.1980         | 8  |
| 8  | 897.4941  | 449.2507        | 880.4676       | 440.7374         |                |                  | P    | 810.3152  | 405.6612        |                |                  | 792.3046       | 396.6560         | 7  |
| 9  | 998.5418  | 499.7745        | 981.5152       | 491.2613         | 980.5312       | 490.7693         | T    | 713.2624  | 357.1349        |                |                  | 695.2519       | 348.1296         | 6  |
| 10 | 1055.5633 | 528.2853        | 1038.5367      | 519.7720         | 1037.5527      | 519.2800         | G    | 612.2148  | 306.6110        |                |                  | 594.2042       | 297.6057         | 5  |
| 11 | 1218.6266 | 609.8169        | 1201.6000      | 601.3037         | 1200.6160      | 600.8116         | Y    | 555.1933  | 278.1003        |                |                  | 537.1827       | 269.0950         | 4  |
| 12 | 1347.6692 | 674.3382        | 1330.6426      | 665.8250         | 1329.6586      | 665.3329         | E    | 392.1300  | 196.5686        |                |                  | 374.1194       | 187.5633         | 3  |
| 13 | 1462.6961 | 731.8517        | 1445.6696      | 723.3384         | 1444.6856      | 722.8464         | D    | 263.0874  | 132.0473        |                |                  | 245.0768       | 123.0420         | 2  |
| 14 |           |                 |                |                  |                |                  | E    | 148.0604  | 74.5339         |                |                  | 130.0499       | 65.5286          | 1  |

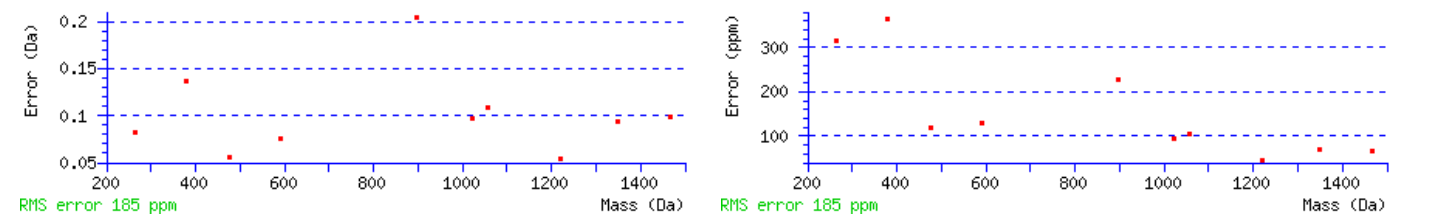

NCBI **BLAST** search of [NPHVNPLPTGYEDE](#)  
(Parameters: blastp, nr protein database, expect=20000, no filter, PAM30)  
Other BLAST [web gateways](#)

All matches to this query

| Score | Mr(calc)  | Delta   | Sequence                         |
|-------|-----------|---------|----------------------------------|
| 52.7  | 1608.7420 | 0.0046  | <a href="#">NPHVNPLPTGYEDE</a>   |
| 21.8  | 1608.8388 | -0.0922 | <a href="#">LIERGASLEEVNDE</a>   |
| 20.9  | 1608.8275 | -0.0809 | <a href="#">ALERDEVETLIDE</a>    |
| 19.1  | 1608.7885 | -0.0419 | <a href="#">EPGGRGGGASTRVEED</a> |
| 18.9  | 1608.7197 | 0.0269  | <a href="#">SMDAPVMIMNGKDE</a>   |
| 18.0  | 1608.8589 | -0.1123 | <a href="#">EVSSIEPLTLGEPE</a>   |
| 17.3  | 1608.8235 | -0.0769 | <a href="#">NTSVSSKSTDPHFP</a>   |
| 17.3  | 1608.5923 | 0.1543  | <a href="#">TSCSYSEDSEDE</a>     |
| 16.1  | 1608.9483 | -0.2017 | <a href="#">PPTLRETKPVNMP</a>    |
| 13.9  | 1608.9169 | -0.1703 | <a href="#">LLEYRAGLVAGHGFA</a>  |

Mascot: <http://www.matrixscience.com/>

Mascot Search Results

Peptide View

MS/MS Fragmentation of **AGNSDLILVPAFNVINGGSHAGNKL**  
Found in **ENOG\_MOUSE** in **SwissProt**, Gamma-enolase OS=Mus musculus GN=Eno2 PE=1 SV=2

Match to Query 9603: 2630.429982 from(877.817270,3+) intensity(22324.3420) scans(11509) rawscans(sn11509) rtinseconds(4300.4458) index(8562)  
Title: 8563: Scan 11509 (rt=4300.45) [C:\Users\Administrador\Desktop\AMOSTRAS NO ORBITRAP LEANDRO RODAR NOVAMENTE\HIPOCAMPO\hipocampo\_01.raw]  
Data file hipocampo\_01.temp.mgf

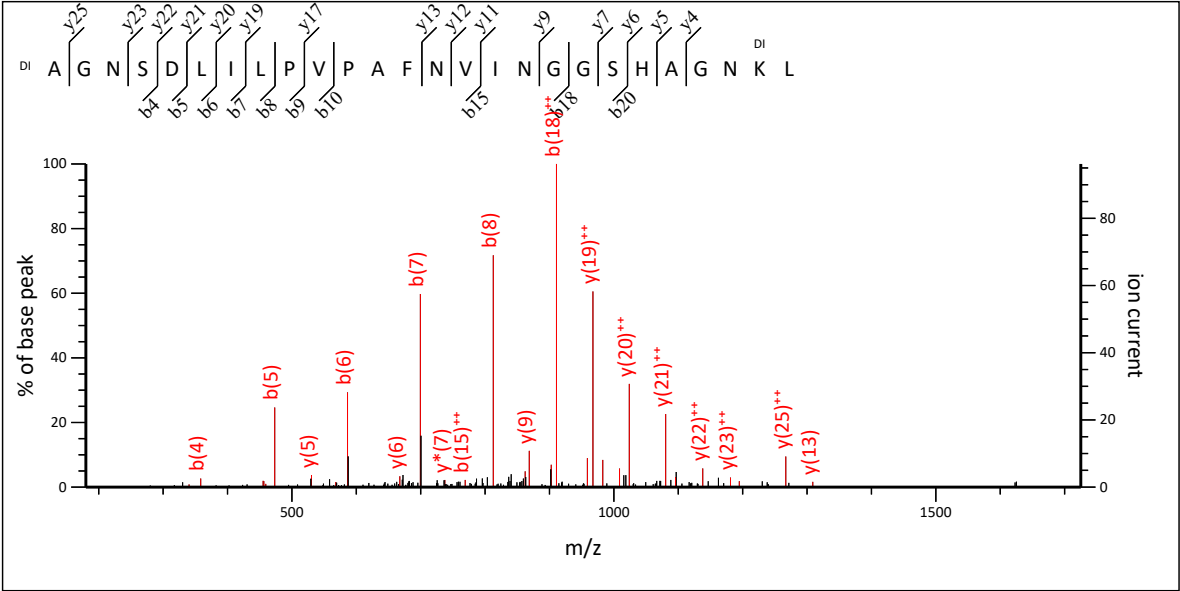

Navigation icons: ? (help), zoom in, zoom out, reset, and a search bar with the range 180.03 to 1725.12.

Label all possible matches ☐ Label matches used for scoring ☒

Monoisotopic mass of neutral peptide Mr(calc): 2630.4180  
Variable modifications:  
N-term : Dimethyl (N-term)  
K25 : Dimethyl (K)  
Ions Score: 81 Expect: 0.00026  
Matches : 34/276 fragment ions using 43 most intense peaks ([help](#))

| #  | b         | b <sup>++</sup> | b <sup>*</sup> | b <sup>+++</sup> | b <sup>0</sup> | b <sup>0++</sup> | Seq. | y         | y <sup>++</sup> | y <sup>*</sup> | y <sup>+++</sup> | y <sup>0</sup> | y <sup>0++</sup> | #  |
|----|-----------|-----------------|----------------|------------------|----------------|------------------|------|-----------|-----------------|----------------|------------------|----------------|------------------|----|
| 1  | 100.0757  | 50.5415         |                |                  |                |                  | A    |           |                 |                |                  |                |                  | 26 |
| 2  | 157.0972  | 79.0522         |                |                  |                |                  | G    | 2532.3569 | 1266.6821       | 2515.3303      | 1258.1688        | 2514.3463      | 1257.6768        | 25 |
| 3  | 271.1401  | 136.0737        | 254.1135       | 127.5604         |                |                  | N    | 2475.3354 | 1238.1714       | 2458.3089      | 1229.6581        | 2457.3249      | 1229.1661        | 24 |
| 4  | 358.1721  | 179.5897        | 341.1456       | 171.0764         | 340.1615       | 170.5844         | S    | 2361.2925 | 1181.1499       | 2344.2660      | 1172.6366        | 2343.2819      | 1172.1446        | 23 |
| 5  | 473.1991  | 237.1032        | 456.1725       | 228.5899         | 455.1885       | 228.0979         | D    | 2274.2605 | 1137.6339       | 2257.2339      | 1129.1206        | 2256.2499      | 1128.6286        | 22 |
| 6  | 586.2831  | 293.6452        | 569.2566       | 285.1319         | 568.2726       | 284.6399         | L    | 2159.2335 | 1080.1204       | 2142.2070      | 1071.6071        | 2141.2230      | 1071.1151        | 21 |
| 7  | 699.3672  | 350.1872        | 682.3406       | 341.6740         | 681.3566       | 341.1819         | I    | 2046.1495 | 1023.5784       | 2029.1229      | 1015.0651        | 2028.1389      | 1014.5731        | 20 |
| 8  | 812.4512  | 406.7293        | 795.4247       | 398.2160         | 794.4407       | 397.7240         | L    | 1933.0654 | 967.0363        | 1916.0389      | 958.5231         | 1915.0548      | 958.0311         | 19 |
| 9  | 909.5040  | 455.2556        | 892.4775       | 446.7424         | 891.4934       | 446.2504         | P    | 1819.9813 | 910.4943        | 1802.9548      | 901.9810         | 1801.9708      | 901.4890         | 18 |
| 10 | 1008.5724 | 504.7898        | 991.5459       | 496.2766         | 990.5619       | 495.7846         | V    | 1722.9286 | 861.9679        | 1705.9020      | 853.4547         | 1704.9180      | 852.9626         | 17 |
| 11 | 1105.6252 | 553.3162        | 1088.5986      | 544.8030         | 1087.6146      | 544.3109         | P    | 1623.8602 | 812.4337        | 1606.8336      | 803.9204         | 1605.8496      | 803.4284         | 16 |
| 12 | 1176.6623 | 588.8348        | 1159.6358      | 580.3215         | 1158.6517      | 579.8295         | A    | 1526.8074 | 763.9073        | 1509.7809      | 755.3941         | 1508.7968      | 754.9021         | 15 |
| 13 | 1323.7307 | 662.3690        | 1306.7042      | 653.8557         | 1305.7201      | 653.3637         | F    | 1455.7703 | 728.3888        | 1438.7437      | 719.8755         | 1437.7597      | 719.3835         | 14 |
| 14 | 1437.7736 | 719.3905        | 1420.7471      | 710.8772         | 1419.7631      | 710.3852         | N    | 1308.7019 | 654.8546        | 1291.6753      | 646.3413         | 1290.6913      | 645.8493         | 13 |
| 15 | 1536.8421 | 768.9247        | 1519.8155      | 760.4114         | 1518.8315      | 759.9194         | V    | 1194.6589 | 597.8331        | 1177.6324      | 589.3198         | 1176.6484      | 588.8278         | 12 |
| 16 | 1649.9261 | 825.4667        | 1632.8996      | 816.9534         | 1631.9156      | 816.4614         | I    | 1095.5905 | 548.2989        | 1078.5640      | 539.7856         | 1077.5800      | 539.2936         | 11 |
| 17 | 1763.9690 | 882.4882        | 1746.9425      | 873.9749         | 1745.9585      | 873.4829         | N    | 982.5065  | 491.7569        | 965.4799       | 483.2436         | 964.4959       | 482.7516         | 10 |
| 18 | 1820.9905 | 910.9989        | 1803.9640      | 902.4856         | 1802.9799      | 901.9936         | G    | 868.4635  | 434.7354        | 851.4370       | 426.2221         | 850.4530       | 425.7301         | 9  |
| 19 | 1878.0120 | 939.5096        | 1860.9854      | 930.9964         | 1860.0014      | 930.5043         | G    | 811.4421  | 406.2247        | 794.4155       | 397.7114         | 793.4315       | 397.2194         | 8  |
| 20 | 1965.0440 | 983.0256        | 1948.0175      | 974.5124         | 1947.0334      | 974.0204         | S    | 754.4206  | 377.7139        | 737.3941       | 369.2007         | 736.4100       | 368.7087         | 7  |
| 21 | 2102.1029 | 1051.5551       | 2085.0764      | 1043.0418        | 2084.0923      | 1042.5498        | H    | 667.3886  | 334.1979        | 650.3620       | 325.6847         |                |                  | 6  |

|    |           |           |           |           |           |           |   |          |          |          |          |  |  |   |
|----|-----------|-----------|-----------|-----------|-----------|-----------|---|----------|----------|----------|----------|--|--|---|
| 22 | 2173.1400 | 1087.0737 | 2156.1135 | 1078.5604 | 2155.1295 | 1078.0684 | A | 530.3297 | 265.6685 | 513.3031 | 257.1552 |  |  | 5 |
| 23 | 2230.1615 | 1115.5844 | 2213.1349 | 1107.0711 | 2212.1509 | 1106.5791 | G | 459.2926 | 230.1499 | 442.2660 | 221.6366 |  |  | 4 |
| 24 | 2344.2044 | 1172.6058 | 2327.1779 | 1164.0926 | 2326.1939 | 1163.6006 | N | 402.2711 | 201.6392 | 385.2445 | 193.1259 |  |  | 3 |
| 25 | 2500.3307 | 1250.6690 | 2483.3041 | 1242.1557 | 2482.3201 | 1241.6637 | K | 288.2282 | 144.6177 | 271.2016 | 136.1044 |  |  | 2 |
| 26 |           |           |           |           |           |           | L | 132.1019 | 66.5546  |          |          |  |  | 1 |

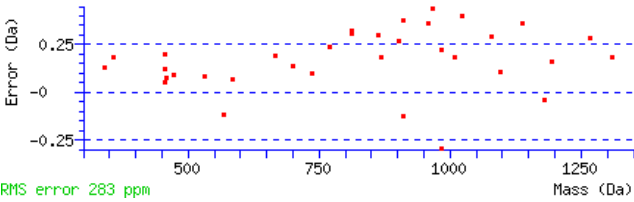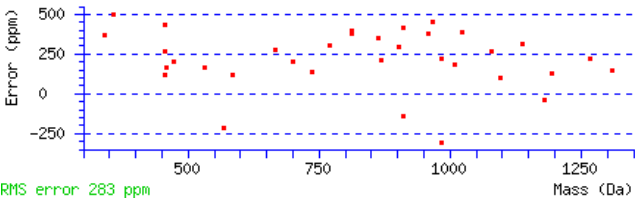

NCBI BLAST search of [AGNSDLILPVPAFNVINGGSHAGNKL](#)  
(Parameters: blastp, nr protein database, expect=20000, no filter, PAM30)  
Other BLAST [web gateways](#)

All matches to this query

| Score | Mr(calc)  | Delta   | Sequence                                     |
|-------|-----------|---------|----------------------------------------------|
| 81.3  | 2630.4180 | 0.0120  | <a href="#">AGNSDLILPVPAFNVINGGSHAGNKL</a>   |
| 37.0  | 2630.4796 | -0.0496 | <a href="#">STSLLGQKKPGYHAPVALLNDIPQ</a>     |
| 27.7  | 2630.5195 | -0.0895 | <a href="#">MLLALILSMAVPTIIGLSLWKEF</a>      |
| 27.7  | 2630.6287 | -0.1987 | <a href="#">PVTFIILLNIIFLVITLCKMVK</a>       |
| 26.4  | 2630.4427 | -0.0127 | <a href="#">AIEMLDGHLyllldmgsGTIKIK</a>      |
| 25.6  | 2630.3262 | 0.1038  | <a href="#">MNVTVEGPTSILQNYQLIHTSE</a>       |
| 25.3  | 2630.4359 | -0.0059 | <a href="#">GTYDIEFYTAAKPGTYVIYVRFGG</a>     |
| 24.0  | 2630.3151 | 0.1148  | <a href="#">APPGALNLGLSSNNSTLSVAGAMGSHGG</a> |
| 23.9  | 2630.5411 | -0.1111 | <a href="#">RQLQQLVLDPGFLGLEPLDLLL</a>       |
| 23.1  | 2630.5197 | -0.0897 | <a href="#">LTVLIPPEETRIDGGPVILLQAGTP</a>    |

Mascot: <http://www.matrixscience.com/>



# Mascot Search Results

## Peptide View

MS/MS Fragmentation of **AFRVPTPNVSVVDL**  
Found in **G3P\_MOUSE** in **SwissProt**, Glyceraldehyde-3-phosphate dehydrogenase OS=Mus musculus GN=Gapdh PE=1 SV=2

Match to Query 5231: 1540.873148 from(771.443850,2+) intensity(23204.3850) scans(10746) rawscans(sn10746) rtinseconds(4016.6452) index(7908)

Title: 7909: Scan 10746 (rt=4016.65) [C:\Users\Administrador\Desktop\AMOSTRAS NO ORBITRAP LEANDRO RODAR NOVAMENTE\HIPOCAMPO\hipocampo\_01.raw]  
Data file hipocampo\_01.temp.mgf

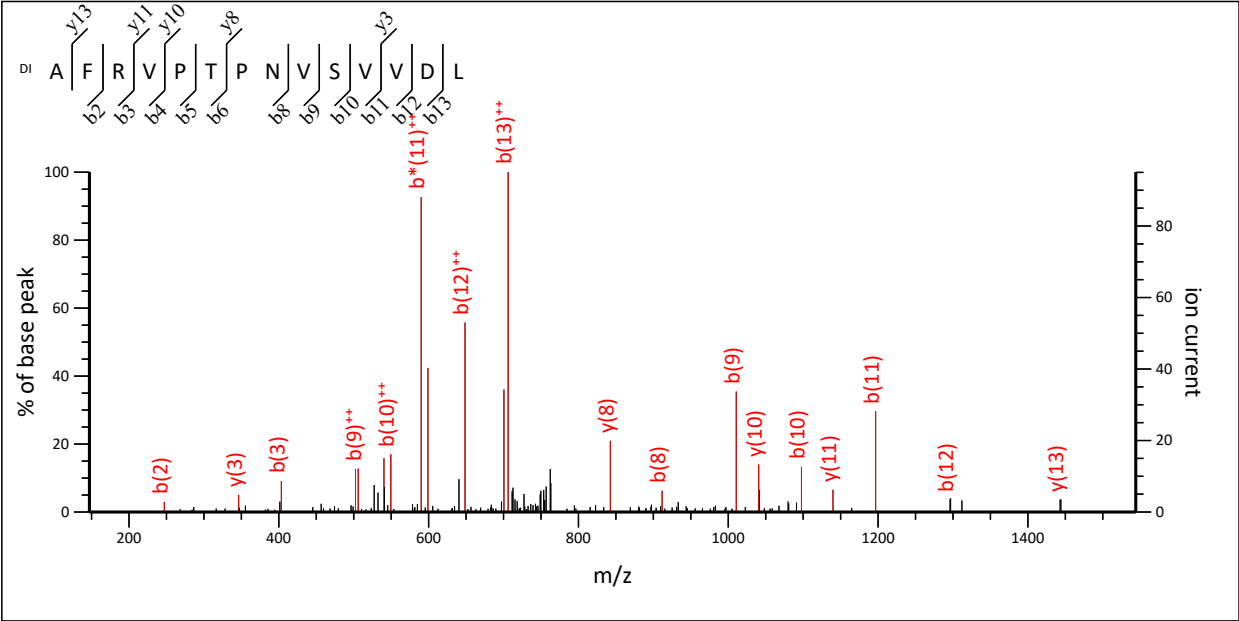



147.15 to 1544.02



Label all possible matches ☐ Label matches used for scoring ☒

Monoisotopic mass of neutral peptide Mr(calc): 1540.8613  
Variable modifications:  
N-term : Dimethyl (N-term)  
Ions Score: 79 Expect: 0.00041  
Matches : 28/128 fragment ions using 34 most intense peaks ([help](#))

| #  | b         | b <sup>++</sup> | b <sup>*</sup> | b <sup>+++</sup> | b <sup>0</sup> | b <sup>0++</sup> | Seq. | y         | y <sup>++</sup> | y <sup>*</sup> | y <sup>+++</sup> | y <sup>0</sup> | y <sup>0++</sup> | #  |
|----|-----------|-----------------|----------------|------------------|----------------|------------------|------|-----------|-----------------|----------------|------------------|----------------|------------------|----|
| 1  | 100.0757  | 50.5415         |                |                  |                |                  | A    |           |                 |                |                  |                |                  | 14 |
| 2  | 247.1441  | 124.0757        |                |                  |                |                  | F    | 1442.8002 | 721.9037        | 1425.7736      | 713.3905         | 1424.7896      | 712.8985         | 13 |
| 3  | 403.2452  | 202.1262        | 386.2187       | 193.6130         |                |                  | R    | 1295.7318 | 648.3695        | 1278.7052      | 639.8563         | 1277.7212      | 639.3642         | 12 |
| 4  | 502.3136  | 251.6605        | 485.2871       | 243.1472         |                |                  | V    | 1139.6307 | 570.3190        | 1122.6041      | 561.8057         | 1121.6201      | 561.3137         | 11 |
| 5  | 599.3664  | 300.1868        | 582.3398       | 291.6736         |                |                  | P    | 1040.5623 | 520.7848        | 1023.5357      | 512.2715         | 1022.5517      | 511.7795         | 10 |
| 6  | 700.4141  | 350.7107        | 683.3875       | 342.1974         | 682.4035       | 341.7054         | T    | 943.5095  | 472.2584        | 926.4829       | 463.7451         | 925.4989       | 463.2531         | 9  |
| 7  | 797.4668  | 399.2371        | 780.4403       | 390.7238         | 779.4563       | 390.2318         | P    | 842.4618  | 421.7345        | 825.4353       | 413.2213         | 824.4512       | 412.7293         | 8  |
| 8  | 911.5098  | 456.2585        | 894.4832       | 447.7452         | 893.4992       | 447.2532         | N    | 745.4090  | 373.2082        | 728.3825       | 364.6949         | 727.3985       | 364.2029         | 7  |
| 9  | 1010.5782 | 505.7927        | 993.5516       | 497.2795         | 992.5676       | 496.7874         | V    | 631.3661  | 316.1867        |                |                  | 613.3556       | 307.1814         | 6  |
| 10 | 1097.6102 | 549.3087        | 1080.5837      | 540.7955         | 1079.5996      | 540.3035         | S    | 532.2977  | 266.6525        |                |                  | 514.2871       | 257.6472         | 5  |
| 11 | 1196.6786 | 598.8429        | 1179.6521      | 590.3297         | 1178.6681      | 589.8377         | V    | 445.2657  | 223.1365        |                |                  | 427.2551       | 214.1312         | 4  |
| 12 | 1295.7470 | 648.3772        | 1278.7205      | 639.8639         | 1277.7365      | 639.3719         | V    | 346.1973  | 173.6023        |                |                  | 328.1867       | 164.5970         | 3  |
| 13 | 1410.7740 | 705.8906        | 1393.7474      | 697.3774         | 1392.7634      | 696.8853         | D    | 247.1288  | 124.0681        |                |                  | 229.1183       | 115.0628         | 2  |
| 14 |           |                 |                |                  |                |                  | L    | 132.1019  | 66.5546         |                |                  |                |                  | 1  |

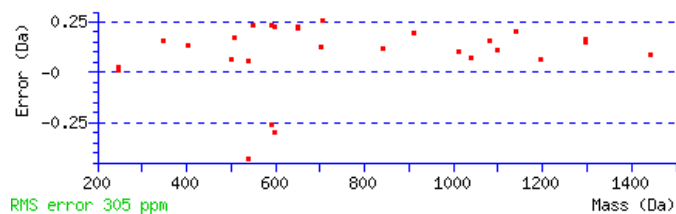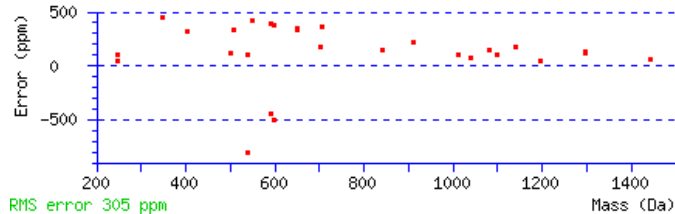

NCBI **BLAST** search of [AFRVPTPNVSVVDL](#)

(Parameters: blastp, nr protein database, expect=20000, no filter, PAM30)

Other BLAST [web gateways](#)

#### All matches to this query

| Score | Mr(calc)  | Delta   | Sequence                        |
|-------|-----------|---------|---------------------------------|
| 78.8  | 1540.8613 | 0.0118  | <a href="#">AFRVPTPNVSVVDL</a>  |
| 30.7  | 1540.9287 | -0.0555 | <a href="#">SIVTGGEGKPGVVDL</a> |
| 30.4  | 1540.8763 | -0.0031 | <a href="#">QLSVPLGQLREEV</a>   |
| 25.4  | 1540.7973 | 0.0758  | <a href="#">DLHHAKDSEGVDI</a>   |
| 24.4  | 1540.7820 | 0.0911  | <a href="#">QFVSLQTQHPRM</a>    |
| 24.1  | 1540.8622 | 0.0109  | <a href="#">ALKTQGSSMSVVDL</a>  |
| 23.8  | 1540.6939 | 0.1793  | <a href="#">MLDMAENEGVVDI</a>   |
| 23.8  | 1540.7415 | 0.1317  | <a href="#">MLDMAEREGVVDI</a>   |
| 23.7  | 1540.9127 | -0.0395 | <a href="#">ILSVVDLNPRGVDL</a>  |
| 23.0  | 1540.9127 | -0.0395 | <a href="#">LTIHQSAQVSVLLT</a>  |

Mascot: <http://www.matrixscience.com/>

# Mascot Search Results

## Peptide View

MS/MS Fragmentation of **TQVVSDAAYKGVQPHVV**  
Found in **LNEBL\_MOUSE** in **SwissProt**, LIM zinc-binding domain-containing Nebulette OS=Mus musculus GN=Nebi PE=1 SV=1  
Match to Query 6921: 1853.007548 from(927.511050,2+) intensity(29419.5640) scans(5889) rawscans(sn5889) rtinseconds(2287.5838) index(3802)  
Title: 3803: Scan 5889 (rt=2287.58) [C:\Users\Administrador\Desktop\AMOSTRAS NO ORBITRAP LEANDRO RODAR NOVAMENTE\HIPOCAMPO\hipocampo\_01.raw]  
Data file hipocampo\_01.temp.mgf

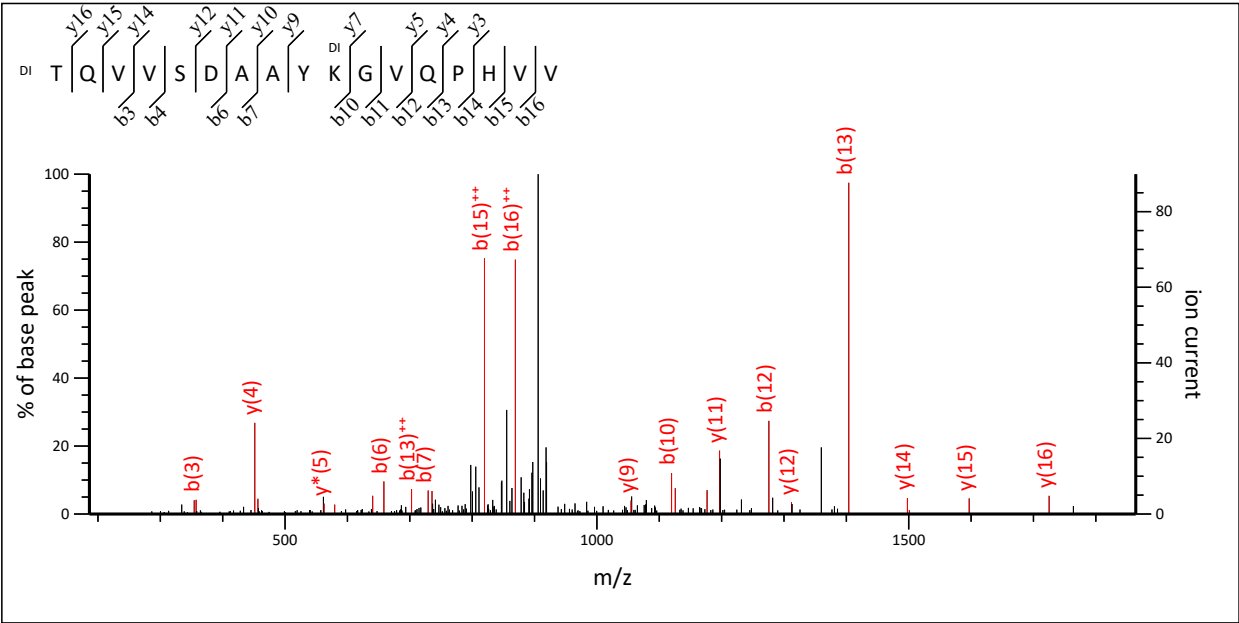



186.31 to 1864.04

Label all possible matches ☐ Label matches used for scoring ☒

Monoisotopic mass of neutral peptide Mr(calc): 1853.0047  
Variable modifications:  
N-term : Dimethyl (N-term)  
K10 : Dimethyl (K)  
Ions Score: 83 Expect: 0.00018  
Matches : 26/160 fragment ions using 39 most intense peaks ([help](#))

| #  | b         | b <sup>++</sup> | b <sup>*</sup> | b <sup>+++</sup> | b <sup>0</sup> | b <sup>0++</sup> | Seq. | y         | y <sup>++</sup> | y <sup>*</sup> | y <sup>+++</sup> | y <sup>0</sup> | y <sup>0++</sup> | #  |
|----|-----------|-----------------|----------------|------------------|----------------|------------------|------|-----------|-----------------|----------------|------------------|----------------|------------------|----|
| 1  | 130.0863  | 65.5468         |                |                  | 112.0757       | 56.5415          | T    |           |                 |                |                  |                |                  | 17 |
| 2  | 258.1448  | 129.5761        | 241.1183       | 121.0628         | 240.1343       | 120.5708         | Q    | 1724.9330 | 862.9701        | 1707.9064      | 854.4569         | 1706.9224      | 853.9649         | 16 |
| 3  | 357.2132  | 179.1103        | 340.1867       | 170.5970         | 339.2027       | 170.1050         | V    | 1596.8744 | 798.9408        | 1579.8479      | 790.4276         | 1578.8639      | 789.9356         | 15 |
| 4  | 456.2817  | 228.6445        | 439.2551       | 220.1312         | 438.2711       | 219.6392         | V    | 1497.8060 | 749.4066        | 1480.7795      | 740.8934         | 1479.7954      | 740.4014         | 14 |
| 5  | 543.3137  | 272.1605        | 526.2871       | 263.6472         | 525.3031       | 263.1552         | S    | 1398.7376 | 699.8724        | 1381.7110      | 691.3592         | 1380.7270      | 690.8672         | 13 |
| 6  | 658.3406  | 329.6740        | 641.3141       | 321.1607         | 640.3301       | 320.6687         | D    | 1311.7056 | 656.3564        | 1294.6790      | 647.8431         | 1293.6950      | 647.3511         | 12 |
| 7  | 729.3777  | 365.1925        | 712.3512       | 356.6792         | 711.3672       | 356.1872         | A    | 1196.6786 | 598.8429        | 1179.6521      | 590.3297         |                |                  | 11 |
| 8  | 800.4149  | 400.7111        | 783.3883       | 392.1978         | 782.4043       | 391.7058         | A    | 1125.6415 | 563.3244        | 1108.6150      | 554.8111         |                |                  | 10 |
| 9  | 963.4782  | 482.2427        | 946.4516       | 473.7295         | 945.4676       | 473.2375         | Y    | 1054.6044 | 527.8058        | 1037.5778      | 519.2926         |                |                  | 9  |
| 10 | 1119.6045 | 560.3059        | 1102.5779      | 551.7926         | 1101.5939      | 551.3006         | K    | 891.5411  | 446.2742        | 874.5145       | 437.7609         |                |                  | 8  |
| 11 | 1176.6259 | 588.8166        | 1159.5994      | 580.3033         | 1158.6154      | 579.8113         | G    | 735.4148  | 368.2110        | 718.3883       | 359.6978         |                |                  | 7  |
| 12 | 1275.6943 | 638.3508        | 1258.6678      | 629.8375         | 1257.6838      | 629.3455         | V    | 678.3933  | 339.7003        | 661.3668       | 331.1870         |                |                  | 6  |
| 13 | 1403.7529 | 702.3801        | 1386.7264      | 693.8668         | 1385.7423      | 693.3748         | Q    | 579.3249  | 290.1661        | 562.2984       | 281.6528         |                |                  | 5  |
| 14 | 1500.8057 | 750.9065        | 1483.7791      | 742.3932         | 1482.7951      | 741.9012         | P    | 451.2663  | 226.1368        |                |                  |                |                  | 4  |
| 15 | 1637.8646 | 819.4359        | 1620.8380      | 810.9227         | 1619.8540      | 810.4306         | H    | 354.2136  | 177.6104        |                |                  |                |                  | 3  |
| 16 | 1736.9330 | 868.9701        | 1719.9064      | 860.4569         | 1718.9224      | 859.9649         | V    | 217.1547  | 109.0810        |                |                  |                |                  | 2  |
| 17 |           |                 |                |                  |                |                  | V    | 118.0863  | 59.5468         |                |                  |                |                  | 1  |

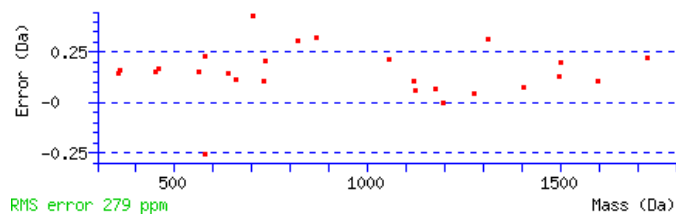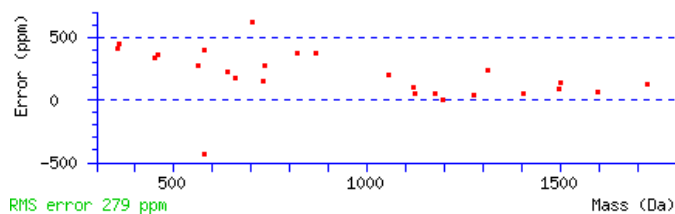

NCBI **BLAST** search of [TQVVSDAAYKGVQPHVV](#)

(Parameters: blastp, nr protein database, expect=20000, no filter, PAM30)

Other BLAST [web gateways](#)

#### All matches to this query

| Score | Mr(calc)  | Delta   | Sequence                           |
|-------|-----------|---------|------------------------------------|
| 82.6  | 1853.0047 | 0.0028  | <a href="#">TQVVSDAAYKGVQPHVV</a>  |
| 17.8  | 1852.9472 | 0.0603  | <a href="#">QTVFTIHPSHVQPAYT</a>   |
| 17.5  | 1852.8426 | 0.1649  | <a href="#">AGPVGEDMFHWQATIM</a>   |
| 16.4  | 1853.0168 | -0.0093 | <a href="#">MDTADGVPVNSRVSTKI</a>  |
| 15.0  | 1852.9117 | 0.0959  | <a href="#">VPPFFACSRQPCPHVV</a>   |
| 13.8  | 1852.8535 | 0.1540  | <a href="#">YCRFHKCLSVGMSHN</a>    |
| 12.2  | 1852.9291 | 0.0785  | <a href="#">LAHPASSNLDPSMQGLPA</a> |
| 11.4  | 1853.0633 | -0.0558 | <a href="#">LSVRSVFFGVFQSEFVV</a>  |
| 11.3  | 1852.9046 | 0.1029  | <a href="#">PSHPPPPYPFGSQQASQ</a>  |
| 11.3  | 1852.9829 | 0.0247  | <a href="#">LGGMRTPAVKAPQERE</a>   |

Mascot: <http://www.matrixscience.com/>

# Mascot Search Results

## Peptide View

MS/MS Fragmentation of **AQATGKPAQYIA**  
Found in **MIF\_MOUSE** in **SwissProt**, Macrophage migration inhibitory factor OS=Mus musculus GN=Mif PE=1 SV=2

Match to Query 3619: 1273.707348 from(637.860950,2+) intensity(114164.7300) scans(3846) rawscans(sn3846) rtinseconds(1624.2138) index(2033)

Title: 2034: Scan 3846 (rt=1624.21) [C:\Users\Administrador\Desktop\AMOSTRAS NO ORBITRAP LEANDRO RODAR NOVAMENTE\HIPOCAMPO\hipocampo\_01.raw]  
Data file hipocampo\_01.temp.mgf

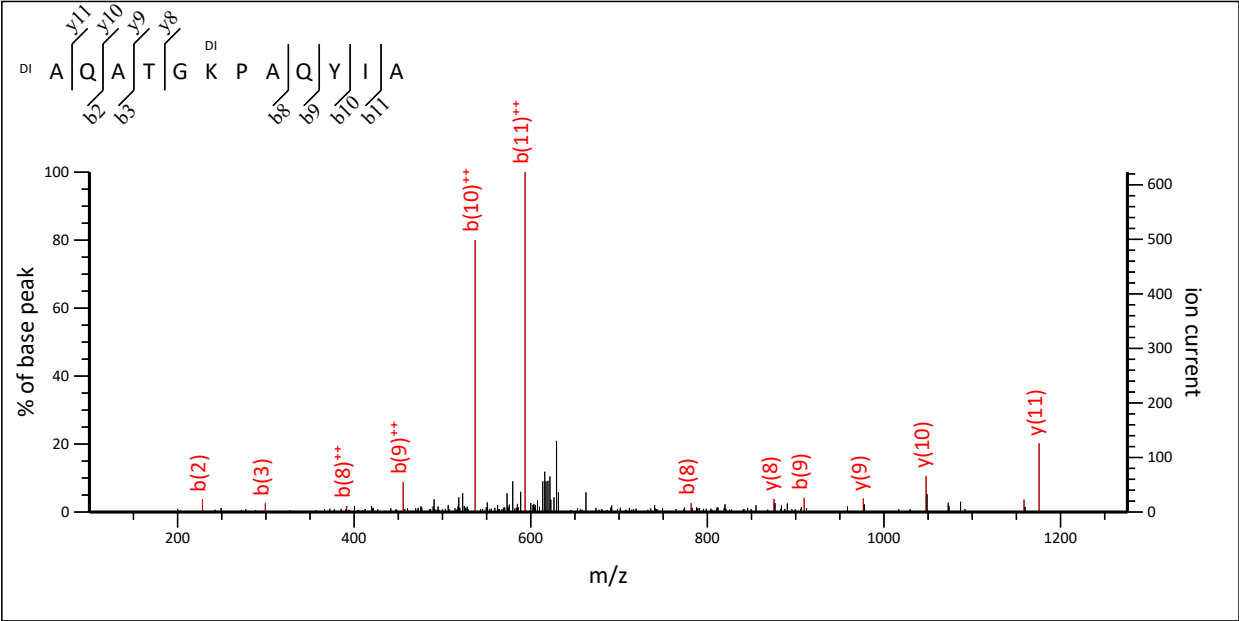

Navigation icons: ? (help), zoom in, zoom out, zoom reset, pan, 100.15 to 1275.74, zoom reset, pan.

Label all possible matches ☐ Label matches used for scoring ☒

Monoisotopic mass of neutral peptide Mr(calc): 1273.7030  
Variable modifications:  
N-term : Dimethyl (N-term)  
K6 : Dimethyl (K)  
Ions Score: 39 Expect: 3.4  
Matches : 13/102 fragment ions using 20 most intense peaks ([help](#))

| #  | b         | b <sup>++</sup> | b <sup>*</sup> | b <sup>+++</sup> | b <sup>0</sup> | b <sup>0++</sup> | Seq. | y         | y <sup>++</sup> | y <sup>*</sup> | y <sup>+++</sup> | y <sup>0</sup> | y <sup>0++</sup> | #  |
|----|-----------|-----------------|----------------|------------------|----------------|------------------|------|-----------|-----------------|----------------|------------------|----------------|------------------|----|
| 1  | 100.0757  | 50.5415         |                |                  |                |                  | A    |           |                 |                |                  |                |                  | 12 |
| 2  | 228.1343  | 114.5708        | 211.1077       | 106.0575         |                |                  | Q    | 1175.6419 | 588.3246        | 1158.6154      | 579.8113         | 1157.6313      | 579.3193         | 11 |
| 3  | 299.1714  | 150.0893        | 282.1448       | 141.5761         |                |                  | A    | 1047.5833 | 524.2953        | 1030.5568      | 515.7820         | 1029.5728      | 515.2900         | 10 |
| 4  | 400.2191  | 200.6132        | 383.1925       | 192.0999         | 382.2085       | 191.6079         | T    | 976.5462  | 488.7767        | 959.5197       | 480.2635         | 958.5356       | 479.7715         | 9  |
| 5  | 457.2405  | 229.1239        | 440.2140       | 220.6106         | 439.2300       | 220.1186         | G    | 875.4985  | 438.2529        | 858.4720       | 429.7396         |                |                  | 8  |
| 6  | 613.3668  | 307.1870        | 596.3402       | 298.6738         | 595.3562       | 298.1817         | K    | 818.4771  | 409.7422        | 801.4505       | 401.2289         |                |                  | 7  |
| 7  | 710.4196  | 355.7134        | 693.3930       | 347.2001         | 692.4090       | 346.7081         | P    | 662.3508  | 331.6790        | 645.3243       | 323.1658         |                |                  | 6  |
| 8  | 781.4567  | 391.2320        | 764.4301       | 382.7187         | 763.4461       | 382.2267         | A    | 565.2980  | 283.1527        | 548.2715       | 274.6394         |                |                  | 5  |
| 9  | 909.5152  | 455.2613        | 892.4887       | 446.7480         | 891.5047       | 446.2560         | Q    | 494.2609  | 247.6341        | 477.2344       | 239.1208         |                |                  | 4  |
| 10 | 1072.5786 | 536.7929        | 1055.5520      | 528.2797         | 1054.5680      | 527.7876         | Y    | 366.2023  | 183.6048        |                |                  |                |                  | 3  |
| 11 | 1185.6626 | 593.3350        | 1168.6361      | 584.8217         | 1167.6521      | 584.3297         | I    | 203.1390  | 102.0731        |                |                  |                |                  | 2  |
| 12 |           |                 |                |                  |                |                  | A    | 90.0550   | 45.5311         |                |                  |                |                  | 1  |

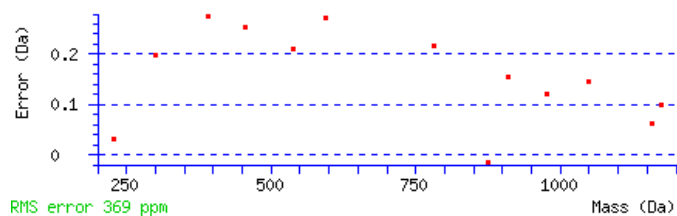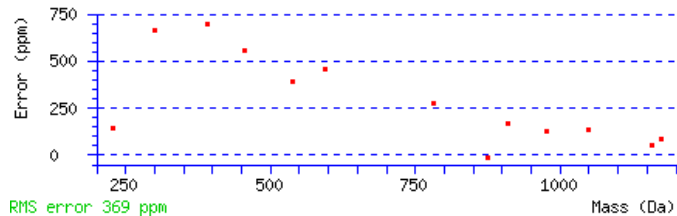

NCBI **BLAST** search of [AQATGKPAQYIA](#)

(Parameters: blastp, nr protein database, expect=20000, no filter, PAM30)

Other BLAST [web gateways](#)

#### All matches to this query

| Score | Mr(calc)  | Delta   | Sequence                       |
|-------|-----------|---------|--------------------------------|
| 39.5  | 1273.7030 | 0.0043  | <a href="#">AQATGKPAQYIA</a>   |
| 24.1  | 1273.6952 | 0.0122  | <a href="#">LKDLKGQMEA</a>     |
| 23.4  | 1273.5860 | 0.1213  | <a href="#">EGLGAPEVGAEMA</a>  |
| 22.1  | 1273.5319 | 0.1755  | <a href="#">AYCQSTMLDTN</a>    |
| 18.9  | 1273.6455 | 0.0618  | <a href="#">GAAQYYVAGHLP</a>   |
| 17.5  | 1273.5972 | 0.1101  | <a href="#">AGAAKCPGSEGSSP</a> |
| 17.2  | 1273.7646 | -0.0572 | <a href="#">EAILKGLQSIF</a>    |
| 16.3  | 1273.8009 | -0.0936 | <a href="#">SGILGLSLFKLA</a>   |
| 15.9  | 1273.5826 | 0.1247  | <a href="#">DLETDHQYLA</a>     |
| 15.6  | 1273.5972 | 0.1101  | <a href="#">SSNHTVMIQET</a>    |

Mascot: <http://www.matrixscience.com/>

Mascot Search Results

Peptide View

MS/MS Fragmentation of **AQATGKPAQYIAVHVVPDQLMTF**  
Found in **MIF\_MOUSE** in **SwissProt**, Macrophage migration inhibitory factor OS=Mus musculus GN=Mif PE=1 SV=2

Match to Query 9456: 2556.356622 from(853.126150,3+) intensity(25264.7190) scans(9989) rawscans(sn9989) rtinseconds(3740.7446) index(7248)  
Title: 7249: Scan 9989 (rt=3740.74) [C:\Users\Administrador\Desktop\AMOSTRAS NO ORBITRAP LEANDRO RODAR  
NOVAMENTE\HIPOCAMPO\hipocampo\_01.raw]  
Data file hipocampo\_01.temp.mgf

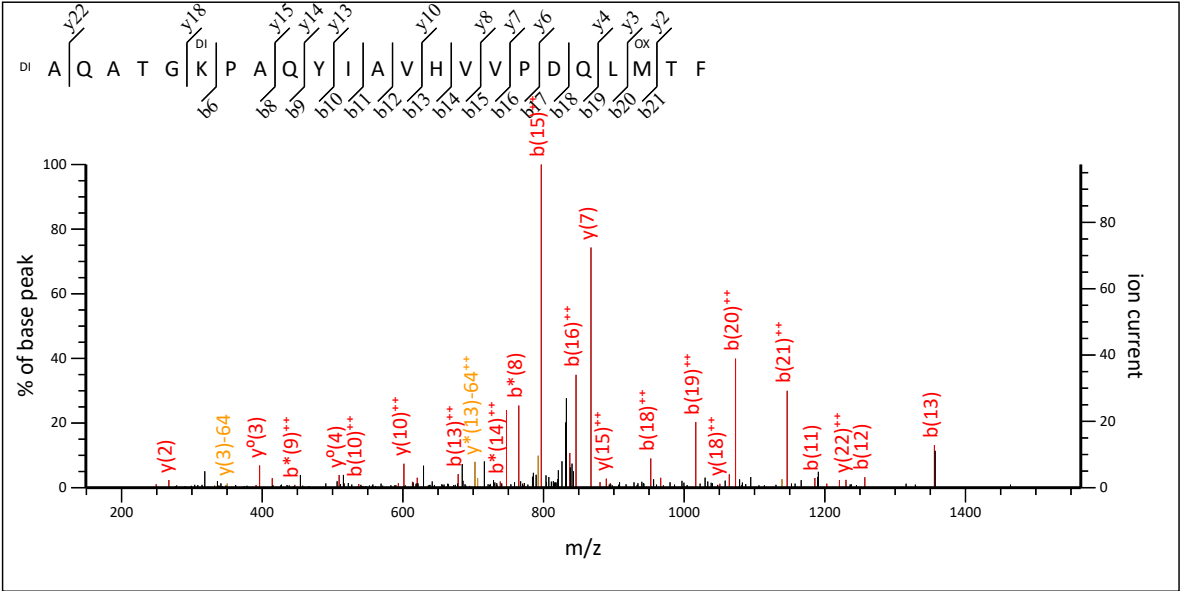

Navigation icons: ? (help), zoom in, zoom out, reset, and a range selector showing 149.24 to 1563.96.

Label all possible matches ☐ Label matches used for scoring ☒

Monoisotopic mass of neutral peptide Mr(calc): 2556.3410  
Variable modifications:  
N-term : Dimethyl (N-term)  
K6 : Dimethyl (K)  
M21 : Oxidation (M), with neutral losses 0.0000(shown in table), 63.9983  
Ions Score: 45 Expect: 1.1  
Matches : 55/374 fragment ions using 96 most intense peaks ([help](#))

| #  | b         | b <sup>++</sup> | b <sup>*</sup> | b <sup>+++</sup> | b <sup>0</sup> | b <sup>0++</sup> | Seq. | y         | y <sup>++</sup> | y <sup>*</sup> | y <sup>+++</sup> | y <sup>0</sup> | y <sup>0++</sup> | #  |
|----|-----------|-----------------|----------------|------------------|----------------|------------------|------|-----------|-----------------|----------------|------------------|----------------|------------------|----|
| 1  | 100.0757  | 50.5415         |                |                  |                |                  | A    |           |                 |                |                  |                |                  | 23 |
| 2  | 228.1343  | 114.5708        | 211.1077       | 106.0575         |                |                  | Q    | 2458.2799 | 1229.6436       | 2441.2533      | 1221.1303        | 2440.2693      | 1220.6383        | 22 |
| 3  | 299.1714  | 150.0893        | 282.1448       | 141.5761         |                |                  | A    | 2330.2213 | 1165.6143       | 2313.1948      | 1157.1010        | 2312.2108      | 1156.6090        | 21 |
| 4  | 400.2191  | 200.6132        | 383.1925       | 192.0999         | 382.2085       | 191.6079         | T    | 2259.1842 | 1130.0957       | 2242.1577      | 1121.5825        | 2241.1736      | 1121.0905        | 20 |
| 5  | 457.2405  | 229.1239        | 440.2140       | 220.6106         | 439.2300       | 220.1186         | G    | 2158.1365 | 1079.5719       | 2141.1100      | 1071.0586        | 2140.1260      | 1070.5666        | 19 |
| 6  | 613.3668  | 307.1870        | 596.3402       | 298.6738         | 595.3562       | 298.1817         | K    | 2101.1151 | 1051.0612       | 2084.0885      | 1042.5479        | 2083.1045      | 1042.0559        | 18 |
| 7  | 710.4196  | 355.7134        | 693.3930       | 347.2001         | 692.4090       | 346.7081         | P    | 1944.9888 | 972.9980        | 1927.9623      | 964.4848         | 1926.9782      | 963.9928         | 17 |
| 8  | 781.4567  | 391.2320        | 764.4301       | 382.7187         | 763.4461       | 382.2267         | A    | 1847.9360 | 924.4717        | 1830.9095      | 915.9584         | 1829.9255      | 915.4664         | 16 |
| 9  | 909.5152  | 455.2613        | 892.4887       | 446.7480         | 891.5047       | 446.2560         | Q    | 1776.8989 | 888.9531        | 1759.8724      | 880.4398         | 1758.8884      | 879.9478         | 15 |
| 10 | 1072.5786 | 536.7929        | 1055.5520      | 528.2797         | 1054.5680      | 527.7876         | Y    | 1648.8403 | 824.9238        | 1631.8138      | 816.4105         | 1630.8298      | 815.9185         | 14 |
| 11 | 1185.6626 | 593.3350        | 1168.6361      | 584.8217         | 1167.6521      | 584.3297         | I    | 1485.7770 | 743.3921        | 1468.7505      | 734.8789         | 1467.7665      | 734.3869         | 13 |
| 12 | 1256.6998 | 628.8535        | 1239.6732      | 620.3402         | 1238.6892      | 619.8482         | A    | 1372.6930 | 686.8501        | 1355.6664      | 678.3368         | 1354.6824      | 677.8448         | 12 |
| 13 | 1355.7682 | 678.3877        | 1338.7416      | 669.8744         | 1337.7576      | 669.3824         | V    | 1301.6558 | 651.3316        | 1284.6293      | 642.8183         | 1283.6453      | 642.3263         | 11 |
| 14 | 1492.8271 | 746.9172        | 1475.8005      | 738.4039         | 1474.8165      | 737.9119         | H    | 1202.5874 | 601.7973        | 1185.5609      | 593.2841         | 1184.5769      | 592.7921         | 10 |
| 15 | 1591.8955 | 796.4514        | 1574.8689      | 787.9381         | 1573.8849      | 787.4461         | V    | 1065.5285 | 533.2679        | 1048.5020      | 524.7546         | 1047.5179      | 524.2626         | 9  |
| 16 | 1690.9639 | 845.9856        | 1673.9374      | 837.4723         | 1672.9533      | 836.9803         | V    | 966.4601  | 483.7337        | 949.4335       | 475.2204         | 948.4495       | 474.7284         | 8  |
| 17 | 1788.0167 | 894.5120        | 1770.9901      | 885.9987         | 1770.0061      | 885.5067         | P    | 867.3917  | 434.1995        | 850.3651       | 425.6862         | 849.3811       | 425.1942         | 7  |
| 18 | 1903.0436 | 952.0254        | 1886.0171      | 943.5122         | 1885.0330      | 943.0202         | D    | 770.3389  | 385.6731        | 753.3124       | 377.1598         | 752.3284       | 376.6678         | 6  |
| 19 | 2031.1022 | 1016.0547       | 2014.0756      | 1007.5415        | 2013.0916      | 1007.0495        | Q    | 655.3120  | 328.1596        | 638.2854       | 319.6464         | 637.3014       | 319.1543         | 5  |
| 20 | 2144.1863 | 1072.5968       | 2127.1597      | 1064.0835        | 2126.1757      | 1063.5915        | L    | 527.2534  | 264.1303        |                |                  | 509.2428       | 255.1251         | 4  |
| 21 | 2291.2217 | 1146.1145       | 2274.1951      | 1137.6012        | 2273.2111      | 1137.1092        | M    | 414.1693  | 207.5883        |                |                  | 396.1588       | 198.5830         | 3  |

|    |           |           |           |           |           |           |   |          |          |  |  |          |          |   |
|----|-----------|-----------|-----------|-----------|-----------|-----------|---|----------|----------|--|--|----------|----------|---|
| 22 | 2392.2693 | 1196.6383 | 2375.2428 | 1188.1250 | 2374.2588 | 1187.6330 | T | 267.1339 | 134.0706 |  |  | 249.1234 | 125.0653 | 2 |
| 23 |           |           |           |           |           |           | F | 166.0863 | 83.5468  |  |  |          |          | 1 |

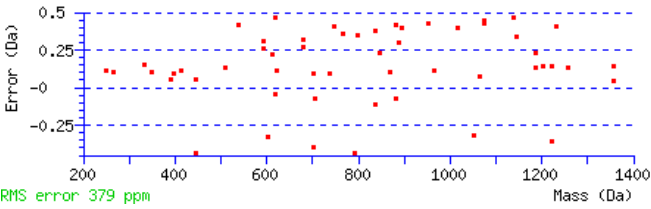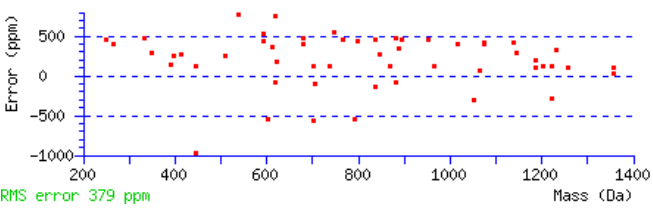

NCBI BLAST search of [AQATGKPAQYIAVHVVPDQLMTE](#)  
(Parameters: blastp, nr protein database, expect=20000, no filter, PAM30)  
Other BLAST [web gateways](#)

All matches to this query

| Score | Mr(calc)  | Delta   | Sequence                                |
|-------|-----------|---------|-----------------------------------------|
| 45.0  | 2556.3410 | 0.0156  | <a href="#">AQATGKPAQYIAVHVVPDQLMTE</a> |
| 14.7  | 2556.2868 | 0.0699  | <a href="#">MSMIQALAMTVAEIPVFLYTTE</a>  |
| 13.8  | 2556.2750 | 0.0816  | <a href="#">VGVDRADMESLKMMASKPLEEH</a>  |
| 13.4  | 2556.2572 | 0.0994  | <a href="#">PAVMQEFANGRMSKAITSCIMAL</a> |
| 13.2  | 2556.4544 | -0.0978 | <a href="#">AVTRVHFPEALGHVALRLVPCPP</a> |
| 12.8  | 2556.4818 | -0.1252 | <a href="#">ITELPKSLFEGLESLQLLLNA</a>   |
| 12.5  | 2556.2294 | 0.1273  | <a href="#">FSMLRDEDGKPYSPSEYSLOQ</a>   |
| 12.3  | 2556.4615 | -0.1049 | <a href="#">FSFLPTRALAALKCTCHHFKGI</a>  |
| 12.1  | 2556.4133 | -0.0567 | <a href="#">TSFILLNLTRAGLGSSAEHFVTV</a> |
| 11.8  | 2556.5611 | -0.2044 | <a href="#">KMGVKKGDRVVGYPNSAHAVE</a>   |

Mascot: <http://www.matrixscience.com/>



Mascot Search Results

Peptide View

MS/MS Fragmentation of **AQATGKPAQYIAVHVVPDQL**  
Found in **MIF\_MOUSE** in **SwissProt**, Macrophage migration inhibitory factor OS=Mus musculus GN=Mif PE=1 SV=2

Match to Query 8410: 2169.248648 from(1085.631600,2+) intensity(11146.7990) scans(8075) rawscans(sn8075) rtinseconds(3057.8712) index(5696)  
Title: 5697: Scan 8075 (rt=3057.87) [C:\Users\Administrador\Desktop\AMOSTRAS NO ORBITRAP LEANDRO RODAR NOVAMENTE\HIPOCAMPO\hipocampo\_01.raw]  
Data file hipocampo\_01.temp.mgf

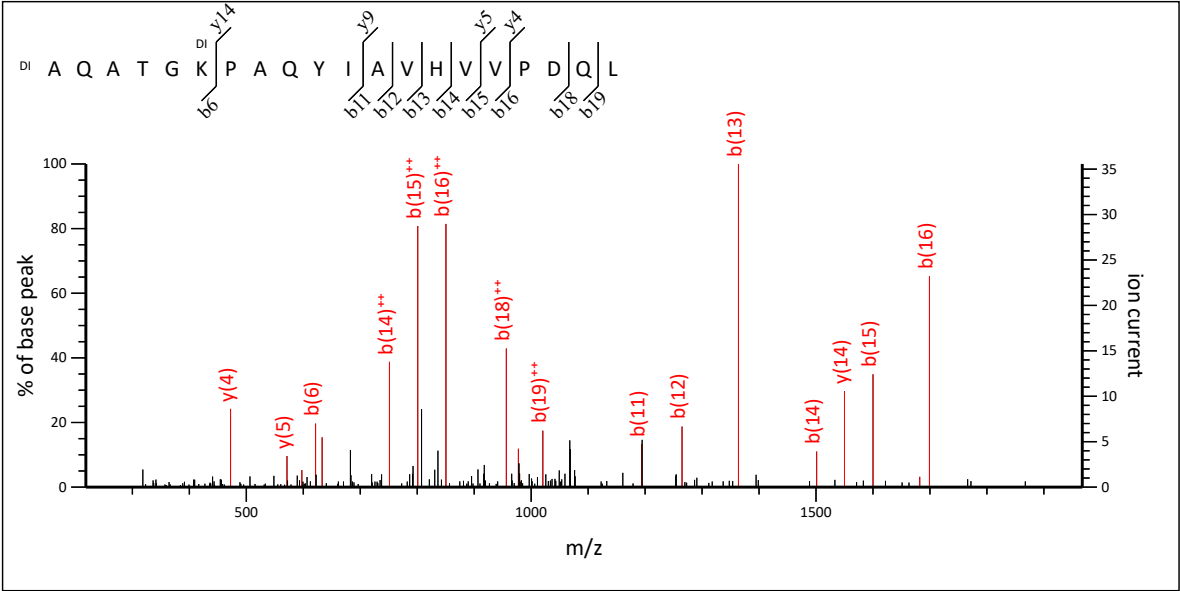

Navigation icons: ? (help), image (download), left arrow, magnifying glass (zoom in), magnifying glass (zoom out), magnifying glass (reset), input field with '218.35 to 1967.4', magnifying glass (search), right arrow.

Label all possible matches ☐ Label matches used for scoring ☒

Monoisotopic mass of neutral peptide Mr(calc): 2169.2398  
Variable modifications:  
N-term : Dimethyl:2H(4) (N-term)  
K6 : Dimethyl:2H(4) (K)  
Ions Score: 47 Expect: 0.62  
Matches : 20/214 fragment ions using 31 most intense peaks (help)

| #  | b         | b <sup>++</sup> | b <sup>*</sup> | b <sup>+++</sup> | b <sup>0</sup> | b <sup>0++</sup> | Seq. | y         | y <sup>++</sup> | y <sup>*</sup> | y <sup>+++</sup> | y <sup>0</sup> | y <sup>0++</sup> | #  |
|----|-----------|-----------------|----------------|------------------|----------------|------------------|------|-----------|-----------------|----------------|------------------|----------------|------------------|----|
| 1  | 104.1008  | 52.5540         |                |                  |                |                  | A    |           |                 |                |                  |                |                  | 20 |
| 2  | 232.1594  | 116.5833        | 215.1328       | 108.0701         |                |                  | Q    | 2067.1535 | 1034.0804       | 2050.1270      | 1025.5671        | 2049.1429      | 1025.0751        | 19 |
| 3  | 303.1965  | 152.1019        | 286.1699       | 143.5886         |                |                  | A    | 1939.0949 | 970.0511        | 1922.0684      | 961.5378         | 1921.0844      | 961.0458         | 18 |
| 4  | 404.2442  | 202.6257        | 387.2176       | 194.1124         | 386.2336       | 193.6204         | T    | 1868.0578 | 934.5325        | 1851.0313      | 926.0193         | 1850.0473      | 925.5273         | 17 |
| 5  | 461.2656  | 231.1365        | 444.2391       | 222.6232         | 443.2551       | 222.1312         | G    | 1767.0101 | 884.0087        | 1749.9836      | 875.4954         | 1748.9996      | 875.0034         | 16 |
| 6  | 621.4170  | 311.2121        | 604.3905       | 302.6989         | 603.4064       | 302.2069         | K    | 1709.9887 | 855.4980        | 1692.9621      | 846.9847         | 1691.9781      | 846.4927         | 15 |
| 7  | 718.4698  | 359.7385        | 701.4432       | 351.2252         | 700.4592       | 350.7332         | P    | 1549.8373 | 775.4223        | 1532.8108      | 766.9090         | 1531.8267      | 766.4170         | 14 |
| 8  | 789.5069  | 395.2571        | 772.4803       | 386.7438         | 771.4963       | 386.2518         | A    | 1452.7845 | 726.8959        | 1435.7580      | 718.3826         | 1434.7740      | 717.8906         | 13 |
| 9  | 917.5655  | 459.2864        | 900.5389       | 450.7731         | 899.5549       | 450.2811         | Q    | 1381.7474 | 691.3774        | 1364.7209      | 682.8641         | 1363.7369      | 682.3721         | 12 |
| 10 | 1080.6288 | 540.8180        | 1063.6022      | 532.3048         | 1062.6182      | 531.8127         | Y    | 1253.6889 | 627.3481        | 1236.6623      | 618.8348         | 1235.6783      | 618.3428         | 11 |
| 11 | 1193.7129 | 597.3601        | 1176.6863      | 588.8468         | 1175.7023      | 588.3548         | I    | 1090.6255 | 545.8164        | 1073.5990      | 537.3031         | 1072.6150      | 536.8111         | 10 |
| 12 | 1264.7500 | 632.8786        | 1247.7234      | 624.3653         | 1246.7394      | 623.8733         | A    | 977.5415  | 489.2744        | 960.5149       | 480.7611         | 959.5309       | 480.2691         | 9  |
| 13 | 1363.8184 | 682.4128        | 1346.7918      | 673.8996         | 1345.8078      | 673.4075         | V    | 906.5043  | 453.7558        | 889.4778       | 445.2425         | 888.4938       | 444.7505         | 8  |
| 14 | 1500.8773 | 750.9423        | 1483.8507      | 742.4290         | 1482.8667      | 741.9370         | H    | 807.4359  | 404.2216        | 790.4094       | 395.7083         | 789.4254       | 395.2163         | 7  |
| 15 | 1599.9457 | 800.4765        | 1582.9192      | 791.9632         | 1581.9351      | 791.4712         | V    | 670.3770  | 335.6921        | 653.3505       | 327.1789         | 652.3665       | 326.6869         | 6  |
| 16 | 1699.0141 | 850.0107        | 1681.9876      | 841.4974         | 1681.0036      | 841.0054         | V    | 571.3086  | 286.1579        | 554.2821       | 277.6447         | 553.2980       | 277.1527         | 5  |
| 17 | 1796.0669 | 898.5371        | 1779.0403      | 890.0238         | 1778.0563      | 889.5318         | P    | 472.2402  | 236.6237        | 455.2136       | 228.1105         | 454.2296       | 227.6185         | 4  |
| 18 | 1911.0938 | 956.0506        | 1894.0673      | 947.5373         | 1893.0833      | 947.0453         | D    | 375.1874  | 188.0974        | 358.1609       | 179.5841         | 357.1769       | 179.0921         | 3  |
| 19 | 2039.1524 | 1020.0798       | 2022.1259      | 1011.5666        | 2021.1418      | 1011.0746        | Q    | 260.1605  | 130.5839        | 243.1339       | 122.0706         |                |                  | 2  |
| 20 |           |                 |                |                  |                |                  | L    | 132.1019  | 66.5546         |                |                  |                |                  | 1  |

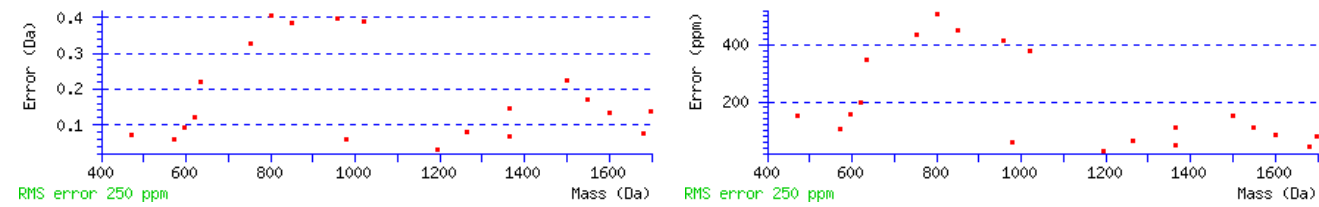

NCBI BLAST search of [AQATGKPAQYIAVHVVPDQL](#)  
(Parameters: blastp, nr protein database, expect=20000, no filter, PAM30)  
Other BLAST [web gateways](#)

All matches to this query

| Score | Mr(calc)  | Delta  | Sequence                             |
|-------|-----------|--------|--------------------------------------|
| 47.3  | 2169.2398 | 0.0089 | <a href="#">AQATGKPAQYIAVHVVPDQL</a> |
| 24.4  | 2169.2386 | 0.0100 | <a href="#">VGRVYRWMVDSRVALRI</a>    |
| 18.9  | 2169.2020 | 0.0466 | <a href="#">GQVLSTLKSEDVPYTAALTA</a> |
| 18.4  | 2169.2207 | 0.0280 | <a href="#">GISGMVAATLTLPFDVVKTQ</a> |
| 17.7  | 2169.1777 | 0.0709 | <a href="#">TIAAVNCPLYVVHVMSKSA</a>  |
| 17.3  | 2169.2021 | 0.0465 | <a href="#">VQIVVIVVVMMVMVVMITC</a>  |
| 17.3  | 2169.2021 | 0.0465 | <a href="#">VQIVVIVVVMMVMVVMITC</a>  |
| 17.3  | 2169.2021 | 0.0465 | <a href="#">VQIVVIVVVMMVMVVMITC</a>  |
| 17.3  | 2169.2021 | 0.0465 | <a href="#">VQIVVIVVVMMVMVVMITC</a>  |
| 17.1  | 2169.1336 | 0.1150 | <a href="#">RSMNHPTVALVRMVAPSPT</a>  |

Mascot: <http://www.matrixscience.com/>

# Mascot Search Results

## Peptide View

MS/MS Fragmentation of **AEDVTAALAKQGL**  
Found in **MTAP2\_MOUSE** in **SwissProt**, Microtubule-associated protein 2 OS=Mus musculus GN=Map2 PE=1 SV=2

Match to Query 4065: 1341.747968 from(671.881260,2+) intensity(63764.9730) scans(7590) rawscans(sn7590) rtinseconds(2884.8337) index(5309)

Title: 5310: Scan 7590 (rt=2884.83) [C:\Users\Administrador\Desktop\AMOSTRAS NO ORBITRAP LEANDRO RODAR NOVAMENTE\HIPOCAMPO\hipocampo\_01.raw]  
Data file hipocampo\_01.temp.mgf

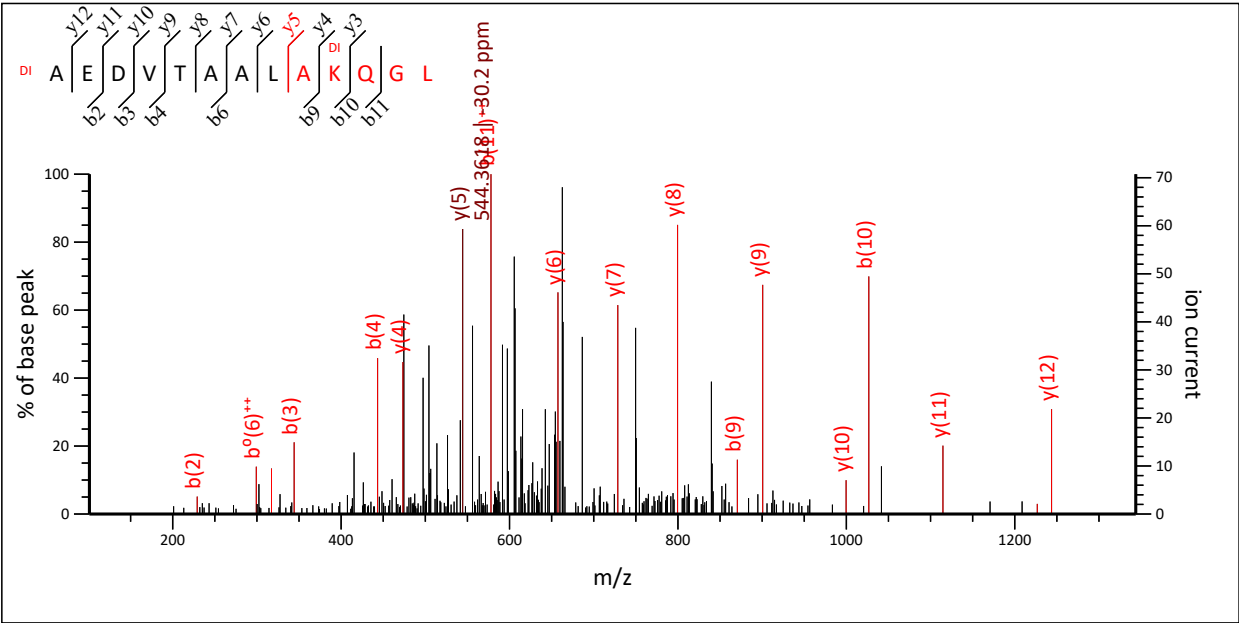

 to 

Label all possible matches ☐ Label matches used for scoring ☒

Monoisotopic mass of neutral peptide Mr(calc): 1341.7504  
Variable modifications:  
N-term : Dimethyl (N-term)  
K10 : Dimethyl (K)  
Ions Score: 69 Expect: 0.0034  
Matches : 21/104 fragment ions using 32 most intense peaks ([help](#))

| #  | b         | b <sup>++</sup> | b <sup>*</sup> | b <sup>++</sup> * | b <sup>0</sup> | b <sup>0++</sup> | Seq. | y         | y <sup>++</sup> | y <sup>*</sup> | y <sup>++</sup> * | y <sup>0</sup> | y <sup>0++</sup> | #  |
|----|-----------|-----------------|----------------|-------------------|----------------|------------------|------|-----------|-----------------|----------------|-------------------|----------------|------------------|----|
| 1  | 100.0757  | 50.5415         |                |                   |                |                  | A    |           |                 |                |                   |                |                  | 13 |
| 2  | 229.1183  | 115.0628        |                |                   | 211.1077       | 106.0575         | E    | 1243.6892 | 622.3483        | 1226.6627      | 613.8350          | 1225.6787      | 613.3430         | 12 |
| 3  | 344.1452  | 172.5763        |                |                   | 326.1347       | 163.5710         | D    | 1114.6467 | 557.8270        | 1097.6201      | 549.3137          | 1096.6361      | 548.8217         | 11 |
| 4  | 443.2136  | 222.1105        |                |                   | 425.2031       | 213.1052         | V    | 999.6197  | 500.3135        | 982.5932       | 491.8002          | 981.6091       | 491.3082         | 10 |
| 5  | 544.2613  | 272.6343        |                |                   | 526.2508       | 263.6290         | T    | 900.5513  | 450.7793        | 883.5247       | 442.2660          | 882.5407       | 441.7740         | 9  |
| 6  | 615.2984  | 308.1529        |                |                   | 597.2879       | 299.1476         | A    | 799.5036  | 400.2554        | 782.4771       | 391.7422          |                |                  | 8  |
| 7  | 686.3355  | 343.6714        |                |                   | 668.3250       | 334.6661         | A    | 728.4665  | 364.7369        | 711.4400       | 356.2236          |                |                  | 7  |
| 8  | 799.4196  | 400.2134        |                |                   | 781.4090       | 391.2082         | L    | 657.4294  | 329.2183        | 640.4028       | 320.7051          |                |                  | 6  |
| 9  | 870.4567  | 435.7320        |                |                   | 852.4462       | 426.7267         | A    | 544.3453  | 272.6763        | 527.3188       | 264.1630          |                |                  | 5  |
| 10 | 1026.5830 | 513.7951        | 1009.5564      | 505.2819          | 1008.5724      | 504.7898         | K    | 473.3082  | 237.1577        | 456.2817       | 228.6445          |                |                  | 4  |
| 11 | 1154.6416 | 577.8244        | 1137.6150      | 569.3111          | 1136.6310      | 568.8191         | Q    | 317.1819  | 159.0946        | 300.1554       | 150.5813          |                |                  | 3  |
| 12 | 1211.6630 | 606.3352        | 1194.6365      | 597.8219          | 1193.6525      | 597.3299         | G    | 189.1234  | 95.0653         |                |                   |                |                  | 2  |
| 13 |           |                 |                |                   |                |                  | L    | 132.1019  | 66.5546         |                |                   |                |                  | 1  |

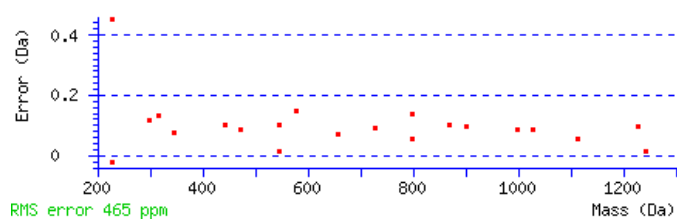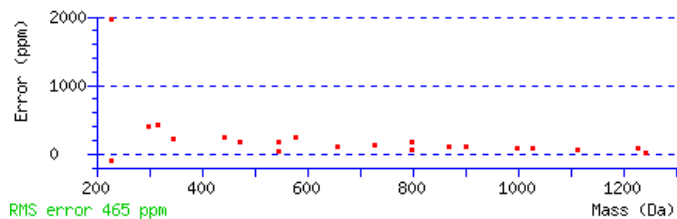

NCBI **BLAST** search of [AEDVTAALAKQGL](#)

(Parameters: blastp, nr protein database, expect=20000, no filter, PAM30)

Other BLAST [web gateways](#)

#### All matches to this query

| Score | Mr(calc)  | Delta   | Sequence                      |
|-------|-----------|---------|-------------------------------|
| 69.5  | 1341.7504 | -0.0024 | <a href="#">AEDVTAALAKQGL</a> |
| 29.2  | 1341.6776 | 0.0704  | <a href="#">AEDVTAPLVDER</a>  |
| 23.3  | 1341.6776 | 0.0704  | <a href="#">AEGQEGQATTPI</a>  |
| 22.9  | 1341.6599 | 0.0881  | <a href="#">TGDNMGHVILLS</a>  |
| 21.6  | 1341.8909 | -0.1429 | <a href="#">KTVTAAIKVMD</a>   |
| 20.4  | 1341.8847 | -0.1367 | <a href="#">TTLSLVKTVVII</a>  |
| 20.0  | 1341.7343 | 0.0137  | <a href="#">LLWGSPAARGSPG</a> |
| 20.0  | 1341.7798 | -0.0318 | <a href="#">IPPEAAATGQRVP</a> |
| 20.0  | 1341.8785 | -0.1305 | <a href="#">LVVVLATAIALLD</a> |
| 19.6  | 1341.7027 | 0.0452  | <a href="#">SVSESPAILPVSE</a> |

Mascot: <http://www.matrixscience.com/>

Mascot Search Results

Peptide View

MS/MS Fragmentation of **GRKGPGGGPGGAGGARGGAGGGPSGD**  
Found in **NEUG\_MOUSE** in **SwissProt**, Neurogranin OS=Mus musculus GN=Nrgn PE=1 SV=1

Match to Query 8425: 2173.080372 from(725.367400,3+) intensity(17060.7050) scans(2144) rawscans(sn2144) rtinseconds(1045.6394) index(527)  
Title: 528: Scan 2144 (rt=1045.64) [C:\Users\Administrador\Desktop\AMOSTRAS NO ORBITRAP LEANDRO RODAR  
NOVAMENTE\HIPOCAMPO\hipocampo\_01.raw]  
Data file hipocampo\_01.temp.mgf

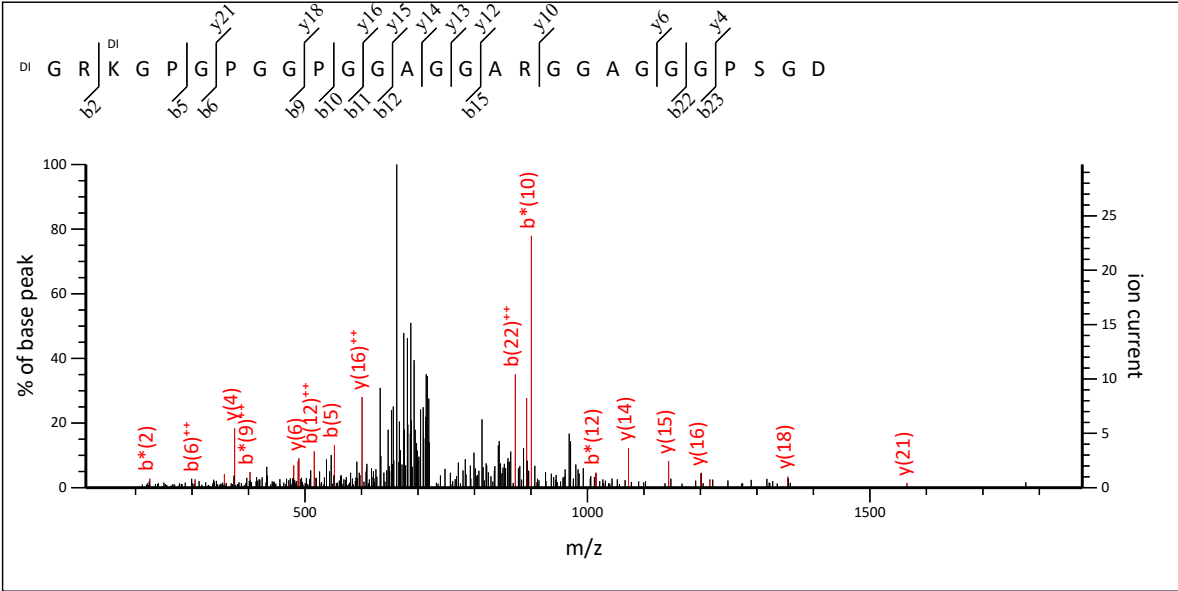

Navigation icons: ? (help), zoom in, zoom out, reset, and a range selector showing 112.08 to 1875.96.

Label all possible matches ☐ Label matches used for scoring ☒

Monoisotopic mass of neutral peptide Mr(calc): 2173.0737  
Variable modifications:  
N-term : Dimethyl (N-term)  
K3 : Dimethyl (K)  
Ions Score: 33 Expect: 18  
Matches : 25/242 fragment ions using 38 most intense peaks ([help](#))

| #  | b         | b <sup>++</sup> | b <sup>*</sup> | b <sup>*++</sup> | b <sup>0</sup> | b <sup>0++</sup> | Seq. | y         | y <sup>++</sup> | y <sup>*</sup> | y <sup>*++</sup> | y <sup>0</sup> | y <sup>0++</sup> | #  |
|----|-----------|-----------------|----------------|------------------|----------------|------------------|------|-----------|-----------------|----------------|------------------|----------------|------------------|----|
| 1  | 86.0600   | 43.5337         |                |                  |                |                  | G    |           |                 |                |                  |                |                  | 27 |
| 2  | 242.1612  | 121.5842        | 225.1346       | 113.0709         |                |                  | R    | 2089.0282 | 1045.0177       | 2072.0016      | 1036.5045        | 2071.0176      | 1036.0125        | 26 |
| 3  | 398.2874  | 199.6473        | 381.2609       | 191.1341         |                |                  | K    | 1932.9271 | 966.9672        | 1915.9005      | 958.4539         | 1914.9165      | 957.9619         | 25 |
| 4  | 455.3089  | 228.1581        | 438.2823       | 219.6448         |                |                  | G    | 1776.8008 | 888.9040        | 1759.7743      | 880.3908         | 1758.7903      | 879.8988         | 24 |
| 5  | 552.3616  | 276.6845        | 535.3351       | 268.1712         |                |                  | P    | 1719.7794 | 860.3933        | 1702.7528      | 851.8800         | 1701.7688      | 851.3880         | 23 |
| 6  | 609.3831  | 305.1952        | 592.3566       | 296.6819         |                |                  | G    | 1622.7266 | 811.8669        | 1605.7000      | 803.3537         | 1604.7160      | 802.8616         | 22 |
| 7  | 706.4359  | 353.7216        | 689.4093       | 345.2083         |                |                  | P    | 1565.7051 | 783.3562        | 1548.6786      | 774.8429         | 1547.6946      | 774.3509         | 21 |
| 8  | 763.4573  | 382.2323        | 746.4308       | 373.7190         |                |                  | G    | 1468.6524 | 734.8298        | 1451.6258      | 726.3165         | 1450.6418      | 725.8245         | 20 |
| 9  | 820.4788  | 410.7430        | 803.4522       | 402.2298         |                |                  | G    | 1411.6309 | 706.3191        | 1394.6043      | 697.8058         | 1393.6203      | 697.3138         | 19 |
| 10 | 917.5316  | 459.2694        | 900.5050       | 450.7561         |                |                  | P    | 1354.6094 | 677.8084        | 1337.5829      | 669.2951         | 1336.5989      | 668.8031         | 18 |
| 11 | 974.5530  | 487.7802        | 957.5265       | 479.2669         |                |                  | G    | 1257.5567 | 629.2820        | 1240.5301      | 620.7687         | 1239.5461      | 620.2767         | 17 |
| 12 | 1031.5745 | 516.2909        | 1014.5479      | 507.7776         |                |                  | G    | 1200.5352 | 600.7712        | 1183.5087      | 592.2580         | 1182.5246      | 591.7660         | 16 |
| 13 | 1102.6116 | 551.8094        | 1085.5851      | 543.2962         |                |                  | A    | 1143.5137 | 572.2605        | 1126.4872      | 563.7472         | 1125.5032      | 563.2552         | 15 |
| 14 | 1159.6331 | 580.3202        | 1142.6065      | 571.8069         |                |                  | G    | 1072.4766 | 536.7420        | 1055.4501      | 528.2287         | 1054.4661      | 527.7367         | 14 |
| 15 | 1216.6545 | 608.8309        | 1199.6280      | 600.3176         |                |                  | G    | 1015.4552 | 508.2312        | 998.4286       | 499.7179         | 997.4446       | 499.2259         | 13 |
| 16 | 1287.6916 | 644.3495        | 1270.6651      | 635.8362         |                |                  | A    | 958.4337  | 479.7205        | 941.4071       | 471.2072         | 940.4231       | 470.7152         | 12 |
| 17 | 1443.7928 | 722.4000        | 1426.7662      | 713.8867         |                |                  | R    | 887.3966  | 444.2019        | 870.3700       | 435.6887         | 869.3860       | 435.1966         | 11 |
| 18 | 1500.8142 | 750.9107        | 1483.7877      | 742.3975         |                |                  | G    | 731.2955  | 366.1514        |                |                  | 713.2849       | 357.1461         | 10 |
| 19 | 1557.8357 | 779.4215        | 1540.8091      | 770.9082         |                |                  | G    | 674.2740  | 337.6406        |                |                  | 656.2634       | 328.6354         | 9  |
| 20 | 1628.8728 | 814.9400        | 1611.8463      | 806.4268         |                |                  | A    | 617.2525  | 309.1299        |                |                  | 599.2420       | 300.1246         | 8  |
| 21 | 1685.8943 | 843.4508        | 1668.8677      | 834.9375         |                |                  | G    | 546.2154  | 273.6114        |                |                  | 528.2049       | 264.6061         | 7  |
| 22 | 1742.9157 | 871.9615        | 1725.8892      | 863.4482         |                |                  | G    | 489.1940  | 245.1006        |                |                  | 471.1834       | 236.0953         | 6  |

|    |           |           |           |           |           |           |   |          |          |  |  |          |          |   |
|----|-----------|-----------|-----------|-----------|-----------|-----------|---|----------|----------|--|--|----------|----------|---|
| 23 | 1799.9372 | 900.4722  | 1782.9106 | 891.9590  |           |           | G | 432.1725 | 216.5899 |  |  | 414.1619 | 207.5846 | 5 |
| 24 | 1896.9900 | 948.9986  | 1879.9634 | 940.4853  |           |           | P | 375.1510 | 188.0792 |  |  | 357.1405 | 179.0739 | 4 |
| 25 | 1984.0220 | 992.5146  | 1966.9954 | 984.0014  | 1966.0114 | 983.5093  | S | 278.0983 | 139.5528 |  |  | 260.0877 | 130.5475 | 3 |
| 26 | 2041.0434 | 1021.0254 | 2024.0169 | 1012.5121 | 2023.0329 | 1012.0201 | G | 191.0662 | 96.0368  |  |  | 173.0557 | 87.0315  | 2 |
| 27 |           |           |           |           |           |           | D | 134.0448 | 67.5260  |  |  | 116.0342 | 58.5207  | 1 |

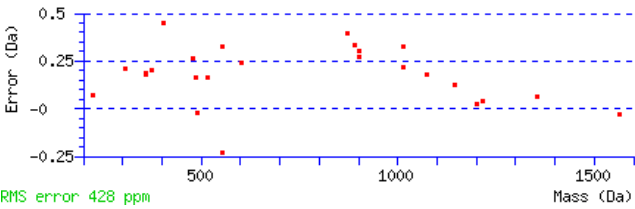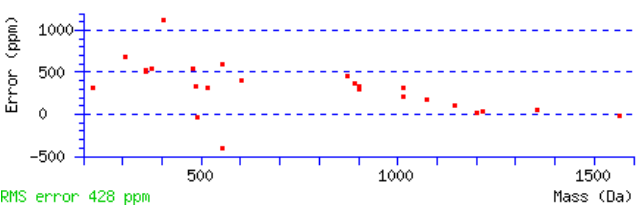

NCBI BLAST search of [GRKGPGGGPGGAGGARGGAGGGPSGD](#)  
(Parameters: blastp, nr protein database, expect=20000, no filter, PAM30)  
Other BLAST [web gateways](#)

All matches to this query

| Score | Mr(calc)  | Delta   | Sequence                                   |
|-------|-----------|---------|--------------------------------------------|
| 32.7  | 2173.0737 | 0.0066  | <a href="#">GRKGPGGGPGGAGGARGGAGGGPSGD</a> |
| 20.0  | 2173.3276 | -0.2472 | <a href="#">PGLVGLVLSYALSLTGLLSGLV</a>     |
| 15.5  | 2173.1793 | -0.0990 | <a href="#">VSRNWARAPLSPGVTTTLTD</a>       |
| 14.4  | 2173.1052 | -0.0248 | <a href="#">QYEYGS GK KYGGPCGGRNC</a>      |
| 13.3  | 2173.3988 | -0.3184 | <a href="#">LKMRI SRL VPWLILASVV</a>       |
| 12.1  | 2173.1565 | -0.0762 | <a href="#">TLRLSLWGMEALGTLGGQVQ</a>       |
| 11.4  | 2173.0184 | 0.0620  | <a href="#">DPSAPCFAPSTLLSPEASPCR</a>      |
| 11.0  | 2173.2793 | -0.1989 | <a href="#">EIAELLRAHSEPG RSLGPK</a>       |
| 10.9  | 2173.2371 | -0.1568 | <a href="#">KHLHTLIFNAARDLLINE</a>         |
| 10.8  | 2173.1467 | -0.0663 | <a href="#">AADGTGVVGGGAVGGGLPKDGLQD</a>   |

Mascot: <http://www.matrixscience.com/>

Mascot Search Results

Peptide View

MS/MS Fragmentation of **KGP GPGGPGAGGARGGAGGGPSGD**  
Found in **NEUG\_MOUSE** in **SwissProt**, Neurogranin OS=Mus musculus GN=Nrgn PE=1 SV=1

Match to Query 7492: 1959.958782 from(654.326870,3+) intensity(305028.6900) scans(2351) rawscans(sn2351) rtinseconds(1121.3576) index(719)  
Title: 720: Scan 2351 (rt=1121.36) [C:\Users\Administrador\Desktop\AMOSTRAS NO ORBITRAP LEANDRO RODAR NOVAMENTE\HIPOCAMPO\hipocampo\_01.raw]  
Data file hipocampo\_01.temp.mgf

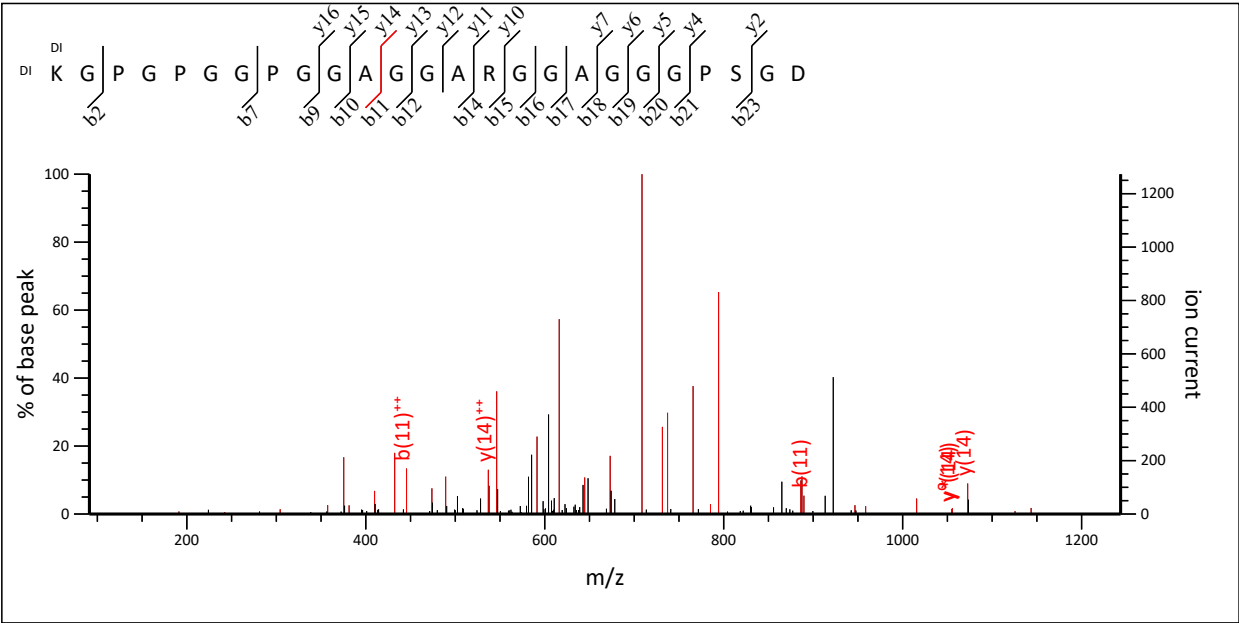

Navigation icons: ? (help), zoom in, zoom out, zoom reset, and a range selector showing 91.13 to 1243.58.

Label all possible matches ☐ Label matches used for scoring ☒

Monoisotopic mass of neutral peptide Mr(calc): 1959.9512  
Variable modifications:  
N-term : Dimethyl (N-term)  
K1 : Dimethyl (K)  
Ions Score: 106 Expect: 9.1e-007  
Matches : 36/224 fragment ions using 46 most intense peaks ([help](#))

| #  | b         | b <sup>++</sup> | b <sup>*</sup> | b <sup>++</sup> * | b <sup>0</sup> | b <sup>0++</sup> | Seq. | y         | y <sup>++</sup> | y <sup>*</sup> | y <sup>++</sup> * | y <sup>0</sup> | y <sup>0++</sup> | #  |
|----|-----------|-----------------|----------------|-------------------|----------------|------------------|------|-----------|-----------------|----------------|-------------------|----------------|------------------|----|
| 1  | 185.1648  | 93.0861         | 168.1383       | 84.5728           |                |                  | K    |           |                 |                |                   |                |                  | 25 |
| 2  | 242.1863  | 121.5968        | 225.1598       | 113.0835          |                |                  | G    | 1776.8008 | 888.9040        | 1759.7743      | 880.3908          | 1758.7903      | 879.8988         | 24 |
| 3  | 339.2391  | 170.1232        | 322.2125       | 161.6099          |                |                  | P    | 1719.7794 | 860.3933        | 1702.7528      | 851.8800          | 1701.7688      | 851.3880         | 23 |
| 4  | 396.2605  | 198.6339        | 379.2340       | 190.1206          |                |                  | G    | 1622.7266 | 811.8669        | 1605.7000      | 803.3537          | 1604.7160      | 802.8616         | 22 |
| 5  | 493.3133  | 247.1603        | 476.2867       | 238.6470          |                |                  | P    | 1565.7051 | 783.3562        | 1548.6786      | 774.8429          | 1547.6946      | 774.3509         | 21 |
| 6  | 550.3348  | 275.6710        | 533.3082       | 267.1577          |                |                  | G    | 1468.6524 | 734.8298        | 1451.6258      | 726.3165          | 1450.6418      | 725.8245         | 20 |
| 7  | 607.3562  | 304.1817        | 590.3297       | 295.6685          |                |                  | G    | 1411.6309 | 706.3191        | 1394.6043      | 697.8058          | 1393.6203      | 697.3138         | 19 |
| 8  | 704.4090  | 352.7081        | 687.3824       | 344.1949          |                |                  | P    | 1354.6094 | 677.8084        | 1337.5829      | 669.2951          | 1336.5989      | 668.8031         | 18 |
| 9  | 761.4305  | 381.2189        | 744.4039       | 372.7056          |                |                  | G    | 1257.5567 | 629.2820        | 1240.5301      | 620.7687          | 1239.5461      | 620.2767         | 17 |
| 10 | 818.4519  | 409.7296        | 801.4254       | 401.2163          |                |                  | G    | 1200.5352 | 600.7712        | 1183.5087      | 592.2580          | 1182.5246      | 591.7660         | 16 |
| 11 | 889.4890  | 445.2482        | 872.4625       | 436.7349          |                |                  | A    | 1143.5137 | 572.2605        | 1126.4872      | 563.7472          | 1125.5032      | 563.2552         | 15 |
| 12 | 946.5105  | 473.7589        | 929.4839       | 465.2456          |                |                  | G    | 1072.4766 | 536.7420        | 1055.4501      | 528.2287          | 1054.4661      | 527.7367         | 14 |
| 13 | 1003.5320 | 502.2696        | 986.5054       | 493.7563          |                |                  | G    | 1015.4552 | 508.2312        | 998.4286       | 499.7179          | 997.4446       | 499.2259         | 13 |
| 14 | 1074.5691 | 537.7882        | 1057.5425      | 529.2749          |                |                  | A    | 958.4337  | 479.7205        | 941.4071       | 471.2072          | 940.4231       | 470.7152         | 12 |
| 15 | 1230.6702 | 615.8387        | 1213.6436      | 607.3255          |                |                  | R    | 887.3966  | 444.2019        | 870.3700       | 435.6887          | 869.3860       | 435.1966         | 11 |
| 16 | 1287.6916 | 644.3495        | 1270.6651      | 635.8362          |                |                  | G    | 731.2955  | 366.1514        |                |                   | 713.2849       | 357.1461         | 10 |
| 17 | 1344.7131 | 672.8602        | 1327.6866      | 664.3469          |                |                  | G    | 674.2740  | 337.6406        |                |                   | 656.2634       | 328.6354         | 9  |
| 18 | 1415.7502 | 708.3788        | 1398.7237      | 699.8655          |                |                  | A    | 617.2525  | 309.1299        |                |                   | 599.2420       | 300.1246         | 8  |

|    |           |          |           |          |           |          |   |          |          |  |  |          |          |   |
|----|-----------|----------|-----------|----------|-----------|----------|---|----------|----------|--|--|----------|----------|---|
| 19 | 1472.7717 | 736.8895 | 1455.7451 | 728.3762 |           |          | G | 546.2154 | 273.6114 |  |  | 528.2049 | 264.6061 | 7 |
| 20 | 1529.7932 | 765.4002 | 1512.7666 | 756.8869 |           |          | G | 489.1940 | 245.1006 |  |  | 471.1834 | 236.0953 | 6 |
| 21 | 1586.8146 | 793.9109 | 1569.7881 | 785.3977 |           |          | G | 432.1725 | 216.5899 |  |  | 414.1619 | 207.5846 | 5 |
| 22 | 1683.8674 | 842.4373 | 1666.8408 | 833.9241 |           |          | P | 375.1510 | 188.0792 |  |  | 357.1405 | 179.0739 | 4 |
| 23 | 1770.8994 | 885.9533 | 1753.8729 | 877.4401 | 1752.8888 | 876.9481 | S | 278.0983 | 139.5528 |  |  | 260.0877 | 130.5475 | 3 |
| 24 | 1827.9209 | 914.4641 | 1810.8943 | 905.9508 | 1809.9103 | 905.4588 | G | 191.0662 | 96.0368  |  |  | 173.0557 | 87.0315  | 2 |
| 25 |           |          |           |          |           |          | D | 134.0448 | 67.5260  |  |  | 116.0342 | 58.5207  | 1 |

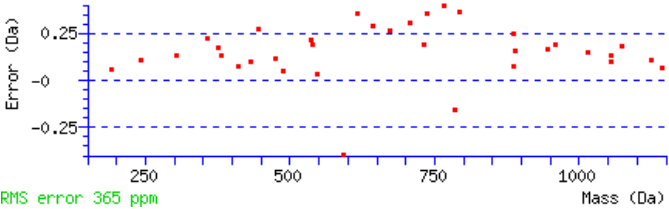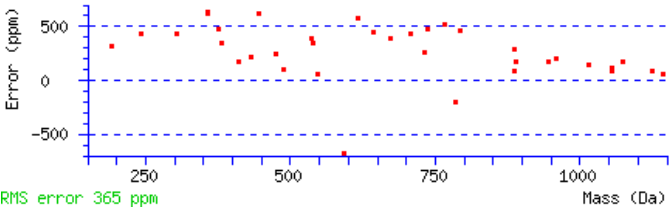

NCBI BLAST search of [KGPGPGGPGGAGGARGGAGGGPSGD](#)  
(Parameters: blastp, nr protein database, expect=20000, no filter, PAM30)  
Other BLAST [web gateways](#)

All matches to this query

| Score | Mr(calc)  | Delta   | Sequence                                  |
|-------|-----------|---------|-------------------------------------------|
| 105.5 | 1959.9512 | 0.0076  | <a href="#">KGPGPGGPGGAGGARGGAGGGPSGD</a> |
| 30.4  | 1959.9185 | 0.0403  | <a href="#">TAIGGGGGPGGGGSGAIDEGGGRD</a>  |
| 29.3  | 1959.9212 | 0.0376  | <a href="#">VLFLMMSGAPDAGGQGGGGGGG</a>    |
| 25.2  | 1960.0757 | -0.1169 | <a href="#">WNGLLPDDTLQDLGLGK</a>         |
| 25.0  | 1960.0036 | -0.0448 | <a href="#">KHLNNMQNLQNGGGEQV</a>         |
| 24.1  | 1960.0030 | -0.0442 | <a href="#">LNDGNFEDNFADKDTVL</a>         |
| 22.6  | 1960.0955 | -0.1367 | <a href="#">GVKYLIVLINKMDDPT</a>          |
| 21.5  | 1960.0240 | -0.0653 | <a href="#">EENGPOKGGLEVADEALV</a>        |
| 21.3  | 1960.0683 | -0.1095 | <a href="#">YRWRAWLLGDAVAGVTV</a>         |
| 21.0  | 1959.8344 | 0.1243  | <a href="#">GEGGGGGGAANPAGGDSAVAGDE</a>   |

Mascot: <http://www.matrixscience.com/>



Mascot Search Results

Peptide View

MS/MS Fragmentation of **RKGPGGPGGAGGARGGGPSGD**  
Found in **NEUG\_MOUSE** in **SwissProt**, Neurogranin OS=Mus musculus GN=Nrgn PE=1 SV=1

Match to Query 8201: 2116.063242 from(706.361690,3+) intensity(39999.9770) scans(2066) rawscans(sn2066) rtinseconds(1016.7325) index(457)  
Title: 458: Scan 2066 (rt=1016.73) [C:\Users\Administrador\Desktop\AMOSTRAS NO ORBITRAP LEANDRO RODAR NOVAMENTE\HIPOCAMPO\hipocampo\_01.raw]  
Data file hipocampo\_01.temp.mgf

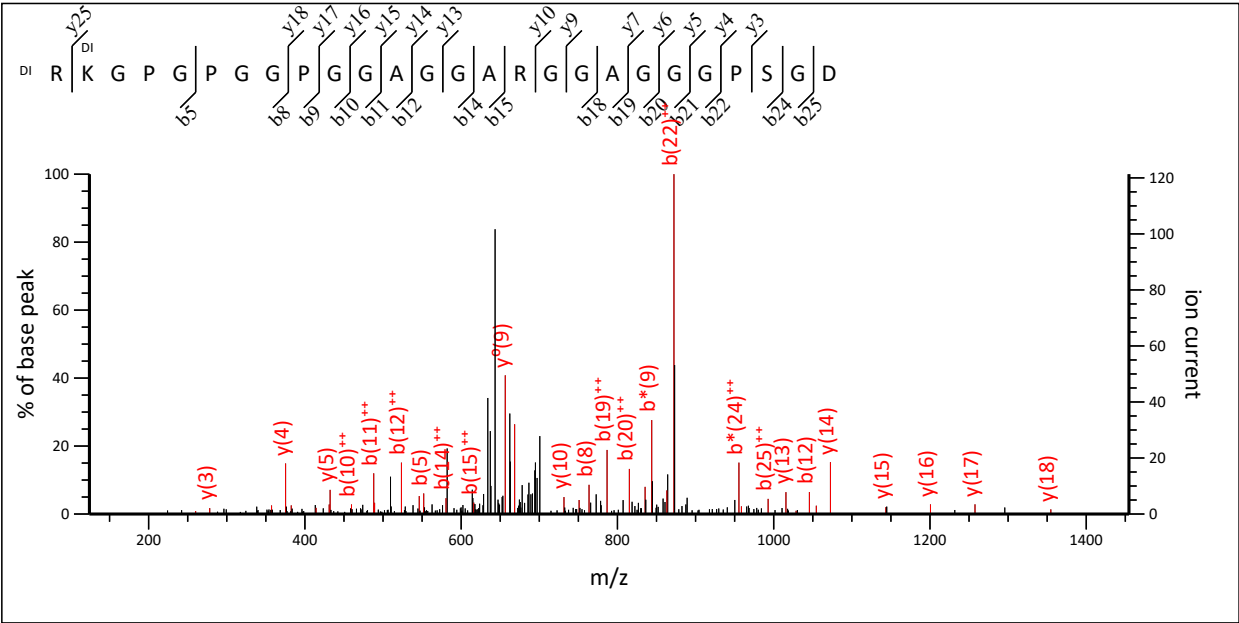

Navigation icons: ? (help), image (download), left arrow, zoom in, zoom out, right arrow, 124.22 to 1454.67 (range), zoom in, right arrow.

Label all possible matches ☐ Label matches used for scoring ☒

Monoisotopic mass of neutral peptide Mr(calc): 2116.0523  
Variable modifications:  
N-term : Dimethyl (N-term)  
K2 : Dimethyl (K)  
Ions Score: 82 Expect: 0.00022  
Matches : 44/234 fragment ions using 68 most intense peaks ([help](#))

| #  | b         | b <sup>++</sup> | b <sup>*</sup> | b <sup>+++</sup> | b <sup>0</sup> | b <sup>0++</sup> | Seq. | y         | y <sup>++</sup> | y <sup>*</sup> | y <sup>+++</sup> | y <sup>0</sup> | y <sup>0++</sup> | #  |
|----|-----------|-----------------|----------------|------------------|----------------|------------------|------|-----------|-----------------|----------------|------------------|----------------|------------------|----|
| 1  | 185.1397  | 93.0735         | 168.1131       | 84.5602          |                |                  | R    |           |                 |                |                  |                |                  | 26 |
| 2  | 341.2659  | 171.1366        | 324.2394       | 162.6233         |                |                  | K    | 1932.9271 | 966.9672        | 1915.9005      | 958.4539         | 1914.9165      | 957.9619         | 25 |
| 3  | 398.2874  | 199.6473        | 381.2609       | 191.1341         |                |                  | G    | 1776.8008 | 888.9040        | 1759.7743      | 880.3908         | 1758.7903      | 879.8988         | 24 |
| 4  | 495.3402  | 248.1737        | 478.3136       | 239.6605         |                |                  | P    | 1719.7794 | 860.3933        | 1702.7528      | 851.8800         | 1701.7688      | 851.3880         | 23 |
| 5  | 552.3616  | 276.6845        | 535.3351       | 268.1712         |                |                  | G    | 1622.7266 | 811.8669        | 1605.7000      | 803.3537         | 1604.7160      | 802.8616         | 22 |
| 6  | 649.4144  | 325.2108        | 632.3879       | 316.6976         |                |                  | P    | 1565.7051 | 783.3562        | 1548.6786      | 774.8429         | 1547.6946      | 774.3509         | 21 |
| 7  | 706.4359  | 353.7216        | 689.4093       | 345.2083         |                |                  | G    | 1468.6524 | 734.8298        | 1451.6258      | 726.3165         | 1450.6418      | 725.8245         | 20 |
| 8  | 763.4573  | 382.2323        | 746.4308       | 373.7190         |                |                  | G    | 1411.6309 | 706.3191        | 1394.6043      | 697.8058         | 1393.6203      | 697.3138         | 19 |
| 9  | 860.5101  | 430.7587        | 843.4835       | 422.2454         |                |                  | P    | 1354.6094 | 677.8084        | 1337.5829      | 669.2951         | 1336.5989      | 668.8031         | 18 |
| 10 | 917.5316  | 459.2694        | 900.5050       | 450.7561         |                |                  | G    | 1257.5567 | 629.2820        | 1240.5301      | 620.7687         | 1239.5461      | 620.2767         | 17 |
| 11 | 974.5530  | 487.7802        | 957.5265       | 479.2669         |                |                  | G    | 1200.5352 | 600.7712        | 1183.5087      | 592.2580         | 1182.5246      | 591.7660         | 16 |
| 12 | 1045.5901 | 523.2987        | 1028.5636      | 514.7854         |                |                  | A    | 1143.5137 | 572.2605        | 1126.4872      | 563.7472         | 1125.5032      | 563.2552         | 15 |
| 13 | 1102.6116 | 551.8094        | 1085.5851      | 543.2962         |                |                  | G    | 1072.4766 | 536.7420        | 1055.4501      | 528.2287         | 1054.4661      | 527.7367         | 14 |
| 14 | 1159.6331 | 580.3202        | 1142.6065      | 571.8069         |                |                  | G    | 1015.4552 | 508.2312        | 998.4286       | 499.7179         | 997.4446       | 499.2259         | 13 |
| 15 | 1230.6702 | 615.8387        | 1213.6436      | 607.3255         |                |                  | A    | 958.4337  | 479.7205        | 941.4071       | 471.2072         | 940.4231       | 470.7152         | 12 |
| 16 | 1386.7713 | 693.8893        | 1369.7447      | 685.3760         |                |                  | R    | 887.3966  | 444.2019        | 870.3700       | 435.6887         | 869.3860       | 435.1966         | 11 |
| 17 | 1443.7928 | 722.4000        | 1426.7662      | 713.8867         |                |                  | G    | 731.2955  | 366.1514        |                |                  | 713.2849       | 357.1461         | 10 |
| 18 | 1500.8142 | 750.9107        | 1483.7877      | 742.3975         |                |                  | G    | 674.2740  | 337.6406        |                |                  | 656.2634       | 328.6354         | 9  |

|    |           |          |           |          |           |          |   |          |          |  |  |          |          |   |
|----|-----------|----------|-----------|----------|-----------|----------|---|----------|----------|--|--|----------|----------|---|
| 19 | 1571.8513 | 786.4293 | 1554.8248 | 777.9160 |           |          | A | 617.2525 | 309.1299 |  |  | 599.2420 | 300.1246 | 8 |
| 20 | 1628.8728 | 814.9400 | 1611.8463 | 806.4268 |           |          | G | 546.2154 | 273.6114 |  |  | 528.2049 | 264.6061 | 7 |
| 21 | 1685.8943 | 843.4508 | 1668.8677 | 834.9375 |           |          | G | 489.1940 | 245.1006 |  |  | 471.1834 | 236.0953 | 6 |
| 22 | 1742.9157 | 871.9615 | 1725.8892 | 863.4482 |           |          | G | 432.1725 | 216.5899 |  |  | 414.1619 | 207.5846 | 5 |
| 23 | 1839.9685 | 920.4879 | 1822.9419 | 911.9746 |           |          | P | 375.1510 | 188.0792 |  |  | 357.1405 | 179.0739 | 4 |
| 24 | 1927.0005 | 964.0039 | 1909.9740 | 955.4906 | 1908.9900 | 954.9986 | S | 278.0983 | 139.5528 |  |  | 260.0877 | 130.5475 | 3 |
| 25 | 1984.0220 | 992.5146 | 1966.9954 | 984.0014 | 1966.0114 | 983.5093 | G | 191.0662 | 96.0368  |  |  | 173.0557 | 87.0315  | 2 |
| 26 |           |          |           |          |           |          | D | 134.0448 | 67.5260  |  |  | 116.0342 | 58.5207  | 1 |

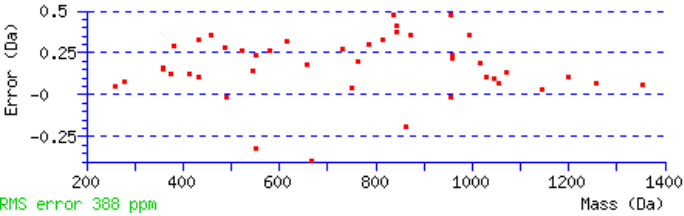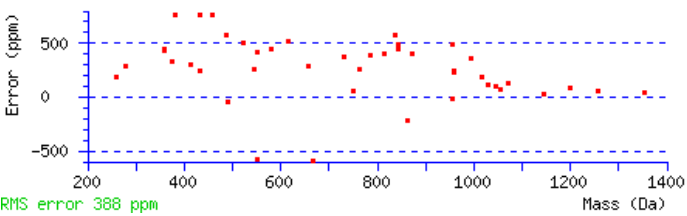

NCBI BLAST search of [RKGP GPGGPGGAGGARGGAGGGPSGD](#)  
(Parameters: blastp, nr protein database, expect=20000, no filter, PAM30)  
Other BLAST [web gateways](#)

All matches to this query

| Score | Mr(calc)  | Delta   | Sequence                                    |
|-------|-----------|---------|---------------------------------------------|
| 81.8  | 2116.0523 | 0.0110  | <a href="#">RKGP GPGGPGGAGGARGGAGGGPSGD</a> |
| 19.6  | 2116.0739 | -0.0106 | <a href="#">GDYVQQHGGVSLVEQLLQD</a>         |
| 18.7  | 2116.2255 | -0.1623 | <a href="#">GPKGSRGYIGLPGLFGLPGSD</a>       |
| 17.6  | 2116.0358 | 0.0274  | <a href="#">IGDGANDVSMIQVADIGIGVS</a>       |
| 17.4  | 2115.9780 | 0.0852  | <a href="#">LAGMSPGAGAMAGMSGSAGAAGVAG</a>   |
| 16.6  | 2116.0722 | -0.0089 | <a href="#">VTEMKALINADELANDVAGA</a>        |
| 16.0  | 2116.1503 | -0.0870 | <a href="#">FRGMTLLHLAAAQGYATLI</a>         |
| 15.7  | 2116.1056 | -0.0424 | <a href="#">LSGFSTAMGALAGGFALPDGLA</a>      |
| 15.6  | 2115.9495 | 0.1137  | <a href="#">GMKGVMEMMVALCGSERA</a>          |
| 14.6  | 2115.9495 | 0.1137  | <a href="#">GMKGVMEMMVALCGSERA</a>          |

Mascot: <http://www.matrixscience.com/>

# Mascot Search Results

## Peptide View

MS/MS Fragmentation of **ADDEPLGRVSF**  
Found in **PPIA\_MOUSE** in **SwissProt**, Peptidyl-prolyl cis-trans isomerase A OS=Mus musculus GN=Ppia PE=1 SV=2

Match to Query 3429: 1232.607428 from(617.310990,2+) intensity(48155.3950) scans(7430) rawscans(sn7430) rtinseconds(2852.3698) index(5207)

Title: 5208: Scan 7430 (rt=2852.37) [C:\Users\Administrador\Desktop\AMOSTRAS NO ORBITRAP LEANDRO RODAR NOVAMENTE\CORTEX\cortex\_01.raw]  
Data file cortex\_01.temp.mgf

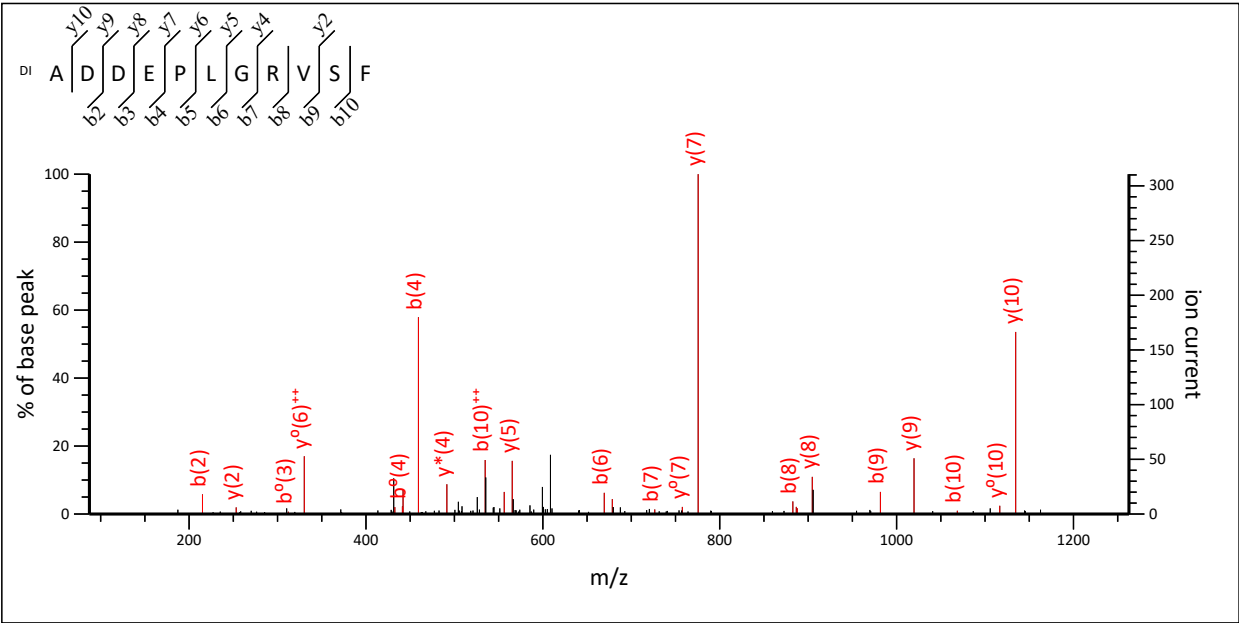

Navigation icons: ? (help), zoom in, zoom out, zoom reset, zoom to fit, zoom to selected, zoom to range. Range: 87.3 to 1262.73.

Label all possible matches ☐ Label matches used for scoring ☒

Monoisotopic mass of neutral peptide Mr(calc): 1232.6037  
Variable modifications:  
N-term : Dimethyl (N-term)  
Ions Score: 60 Expect: 0.029  
Matches : 28/96 fragment ions using 49 most intense peaks ([help](#))

| #  | b         | b <sup>++</sup> | b <sup>*</sup> | b <sup>+++</sup> | b <sup>0</sup> | b <sup>0++</sup> | Seq. | y         | y <sup>++</sup> | y <sup>*</sup> | y <sup>+++</sup> | y <sup>0</sup> | y <sup>0++</sup> | #  |
|----|-----------|-----------------|----------------|------------------|----------------|------------------|------|-----------|-----------------|----------------|------------------|----------------|------------------|----|
| 1  | 100.0757  | 50.5415         |                |                  |                |                  | A    |           |                 |                |                  |                |                  | 11 |
| 2  | 215.1026  | 108.0550        |                |                  | 197.0921       | 99.0497          | D    | 1134.5426 | 567.7749        | 1117.5160      | 559.2617         | 1116.5320      | 558.7696         | 10 |
| 3  | 330.1296  | 165.5684        |                |                  | 312.1190       | 156.5631         | D    | 1019.5156 | 510.2615        | 1002.4891      | 501.7482         | 1001.5051      | 501.2562         | 9  |
| 4  | 459.1722  | 230.0897        |                |                  | 441.1616       | 221.0844         | E    | 904.4887  | 452.7480        | 887.4621       | 444.2347         | 886.4781       | 443.7427         | 8  |
| 5  | 556.2249  | 278.6161        |                |                  | 538.2144       | 269.6108         | P    | 775.4461  | 388.2267        | 758.4196       | 379.7134         | 757.4355       | 379.2214         | 7  |
| 6  | 669.3090  | 335.1581        |                |                  | 651.2984       | 326.1529         | L    | 678.3933  | 339.7003        | 661.3668       | 331.1870         | 660.3828       | 330.6950         | 6  |
| 7  | 726.3305  | 363.6689        |                |                  | 708.3199       | 354.6636         | G    | 565.3093  | 283.1583        | 548.2827       | 274.6450         | 547.2987       | 274.1530         | 5  |
| 8  | 882.4316  | 441.7194        | 865.4050       | 433.2061         | 864.4210       | 432.7141         | R    | 508.2878  | 254.6475        | 491.2613       | 246.1343         | 490.2772       | 245.6423         | 4  |
| 9  | 981.5000  | 491.2536        | 964.4734       | 482.7404         | 963.4894       | 482.2483         | V    | 352.1867  | 176.5970        |                |                  | 334.1761       | 167.5917         | 3  |
| 10 | 1068.5320 | 534.7696        | 1051.5055      | 526.2564         | 1050.5214      | 525.7644         | S    | 253.1183  | 127.0628        |                |                  | 235.1077       | 118.0575         | 2  |
| 11 |           |                 |                |                  |                |                  | F    | 166.0863  | 83.5468         |                |                  |                |                  | 1  |

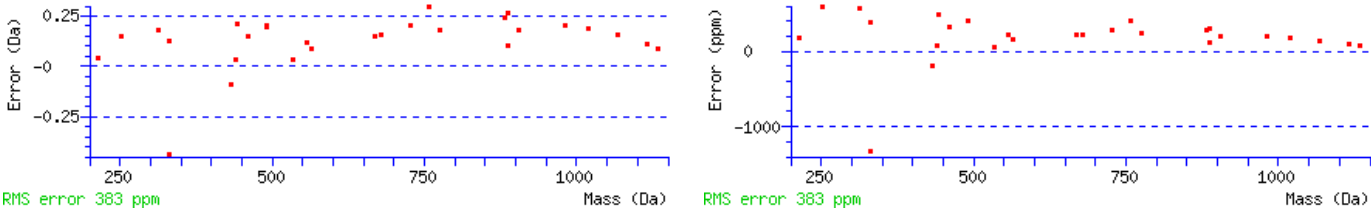

NCBI **BLAST** search of [ADDEPLGRVSF](#)

(Parameters: blastp, nr protein database, expect=20000, no filter, PAM30)

Other BLAST [web gateways](#)

**All matches to this query**

| Score | Mr(calc)  | Delta   | Sequence                    |
|-------|-----------|---------|-----------------------------|
| 60.1  | 1232.6037 | 0.0037  | <a href="#">ADDEPLGRVSF</a> |
| 26.9  | 1232.7832 | -0.1757 | <a href="#">SVVLKALEDPV</a> |
| 26.9  | 1232.5710 | 0.0364  | <a href="#">PSLESDENPV</a>  |
| 26.8  | 1232.5884 | 0.0190  | <a href="#">ADDEKSEDRI</a>  |
| 26.8  | 1232.6765 | -0.0691 | <a href="#">ADPKGHLETPI</a> |
| 26.6  | 1232.6111 | -0.0037 | <a href="#">ALVFPNSDPVM</a> |
| 25.9  | 1232.5781 | 0.0293  | <a href="#">EGMICNVELPT</a> |
| 24.5  | 1232.7591 | -0.1517 | <a href="#">SKEPNLVVSF</a>  |
| 24.1  | 1232.6435 | -0.0360 | <a href="#">KTMRSTTDPV</a>  |
| 22.6  | 1232.5747 | 0.0327  | <a href="#">WNEADMEVIV</a>  |

**Mascot:** <http://www.matrixscience.com/>

# Mascot Search Results

## Peptide View

MS/MS Fragmentation of **ADKVPKTAENF**  
Found in **PPIA\_MOUSE** in **SwissProt**, Peptidyl-prolyl cis-trans isomerase A OS=Mus musculus GN=Ppia PE=1 SV=2

Match to Query 3953: 1302.721248 from(652.367900,2+) intensity(502996.7200) scans(3630) rawscans(sn3630) rtinseconds(1558.8044) index(1888)  
Title: 1889: Scan 3630 (rt=1558.8) [C:\Users\Administrador\Desktop\AMOSTRAS NO ORBITRAP LEANDRO RODAR NOVAMENTE\CORTEX\cortex\_01.raw]  
Data file cortex\_01.temp.mgf

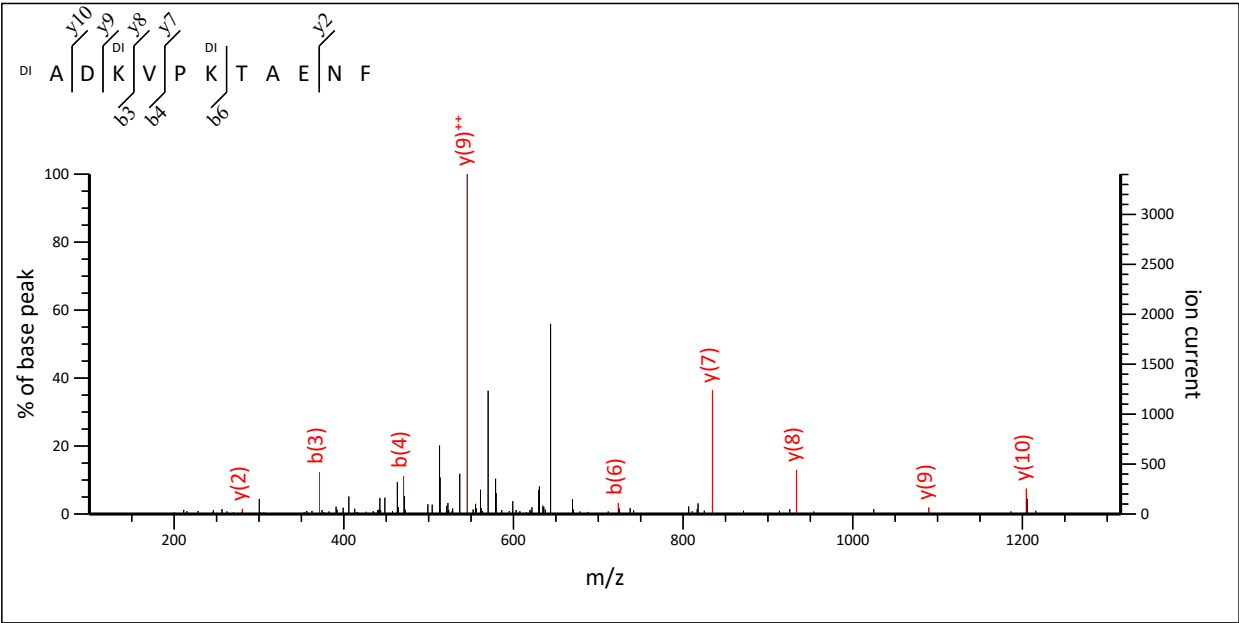

Navigation icons: ? (help), image (download), left arrow, zoom in, zoom out, zoom reset, 100.09 to 1315.79 (mass range), zoom in, right arrow.

Label all possible matches ☐ Label matches used for scoring ☒

Monoisotopic mass of neutral peptide Mr(calc): 1302.7184  
Variable modifications:  
N-term : Dimethyl (N-term)  
K3 : Dimethyl (K)  
K6 : Dimethyl (K)  
Ions Score: 40 Expect: 3.1  
Matches : 10/108 fragment ions using 11 most intense peaks ([help](#))

| #  | b         | b <sup>++</sup> | b <sup>*</sup> | b <sup>+++</sup> | b <sup>0</sup> | b <sup>0++</sup> | Seq. | y         | y <sup>++</sup> | y <sup>*</sup> | y <sup>+++</sup> | y <sup>0</sup> | y <sup>0++</sup> | #  |
|----|-----------|-----------------|----------------|------------------|----------------|------------------|------|-----------|-----------------|----------------|------------------|----------------|------------------|----|
| 1  | 100.0757  | 50.5415         |                |                  |                |                  | A    |           |                 |                |                  |                |                  | 11 |
| 2  | 215.1026  | 108.0550        |                |                  | 197.0921       | 99.0497          | D    | 1204.6572 | 602.8322        | 1187.6307      | 594.3190         | 1186.6467      | 593.8270         | 10 |
| 3  | 371.2289  | 186.1181        | 354.2023       | 177.6048         | 353.2183       | 177.1128         | K    | 1089.6303 | 545.3188        | 1072.6037      | 536.8055         | 1071.6197      | 536.3135         | 9  |
| 4  | 470.2973  | 235.6523        | 453.2708       | 227.1390         | 452.2867       | 226.6470         | V    | 933.5040  | 467.2556        | 916.4775       | 458.7424         | 915.4934       | 458.2504         | 8  |
| 5  | 567.3501  | 284.1787        | 550.3235       | 275.6654         | 549.3395       | 275.1734         | P    | 834.4356  | 417.7214        | 817.4090       | 409.2082         | 816.4250       | 408.7162         | 7  |
| 6  | 723.4763  | 362.2418        | 706.4498       | 353.7285         | 705.4658       | 353.2365         | K    | 737.3828  | 369.1951        | 720.3563       | 360.6818         | 719.3723       | 360.1898         | 6  |
| 7  | 824.5240  | 412.7656        | 807.4975       | 404.2524         | 806.5135       | 403.7604         | T    | 581.2566  | 291.1319        | 564.2300       | 282.6186         | 563.2460       | 282.1266         | 5  |
| 8  | 895.5611  | 448.2842        | 878.5346       | 439.7709         | 877.5506       | 439.2789         | A    | 480.2089  | 240.6081        | 463.1823       | 232.0948         | 462.1983       | 231.6028         | 4  |
| 9  | 1024.6037 | 512.8055        | 1007.5772      | 504.2922         | 1006.5932      | 503.8002         | E    | 409.1718  | 205.0895        | 392.1452       | 196.5763         | 391.1612       | 196.0842         | 3  |
| 10 | 1138.6467 | 569.8270        | 1121.6201      | 561.3137         | 1120.6361      | 560.8217         | N    | 280.1292  | 140.5682        | 263.1026       | 132.0550         |                |                  | 2  |
| 11 |           |                 |                |                  |                |                  | F    | 166.0863  | 83.5468         |                |                  |                |                  | 1  |

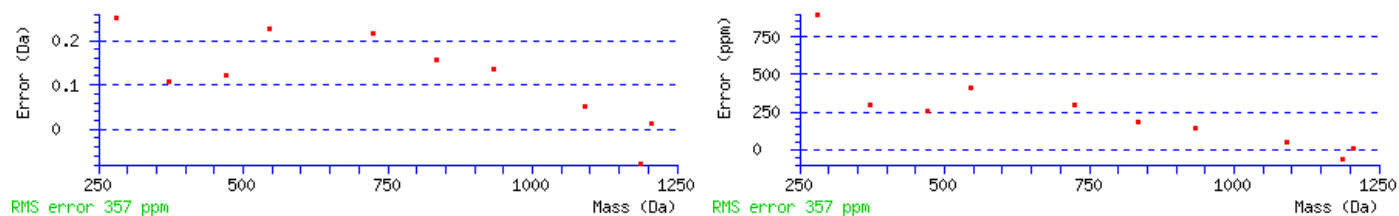

NCBI **BLAST** search of [ADKVPKTAENE](#)

(Parameters: blastp, nr protein database, expect=20000, no filter, PAM30)

Other BLAST [web gateways](#)

#### All matches to this query

| Score | Mr(calc)  | Delta   | Sequence                      |
|-------|-----------|---------|-------------------------------|
| 39.8  | 1302.7184 | 0.0029  | <a href="#">ADKVPKTAENE</a>   |
| 33.6  | 1302.6905 | 0.0307  | <a href="#">ADRRGLHVQSH</a>   |
| 26.5  | 1302.7296 | -0.0083 | <a href="#">ADKVSSVRWIS</a>   |
| 26.1  | 1302.7395 | -0.0183 | <a href="#">ADKVESGKTSVV</a>  |
| 25.7  | 1302.6932 | 0.0280  | <a href="#">DGGLVSNAPHIPV</a> |
| 24.1  | 1302.8163 | -0.0950 | <a href="#">ADKVLISILYI</a>   |
| 22.6  | 1302.8639 | -0.1427 | <a href="#">AKVPEVPKKPV</a>   |
| 21.7  | 1302.6213 | 0.1000  | <a href="#">GWGCMGRLAAPV</a>  |
| 21.7  | 1302.7953 | -0.0741 | <a href="#">HSIPLAHVRPV</a>   |
| 21.7  | 1302.9367 | -0.2154 | <a href="#">KPKVVVKVPV</a>    |

Mascot: <http://www.matrixscience.com/>

# Mascot Search Results

## Peptide View

MS/MS Fragmentation of **ADKVPKTAENFR**  
Found in **PPIA\_MOUSE** in **SwissProt**, Peptidyl-prolyl cis-trans isomerase A OS=Mus musculus GN=Ppia PE=1 SV=2

Match to Query 5162: 1470.899548 from(736.457050,2+) intensity(51143.2770) scans(2908) rawscans(sn2908) rtinseconds(1323.3495) index(1267)  
Title: 1268: Scan 2908 (rt=1323.35) [C:\Users\Administrador\Desktop\AMOSTRAS NO ORBITRAP LEANDRO RODAR NOVAMENTE\CORTEX\cortex\_01.raw]  
Data file cortex\_01.temp.mgf

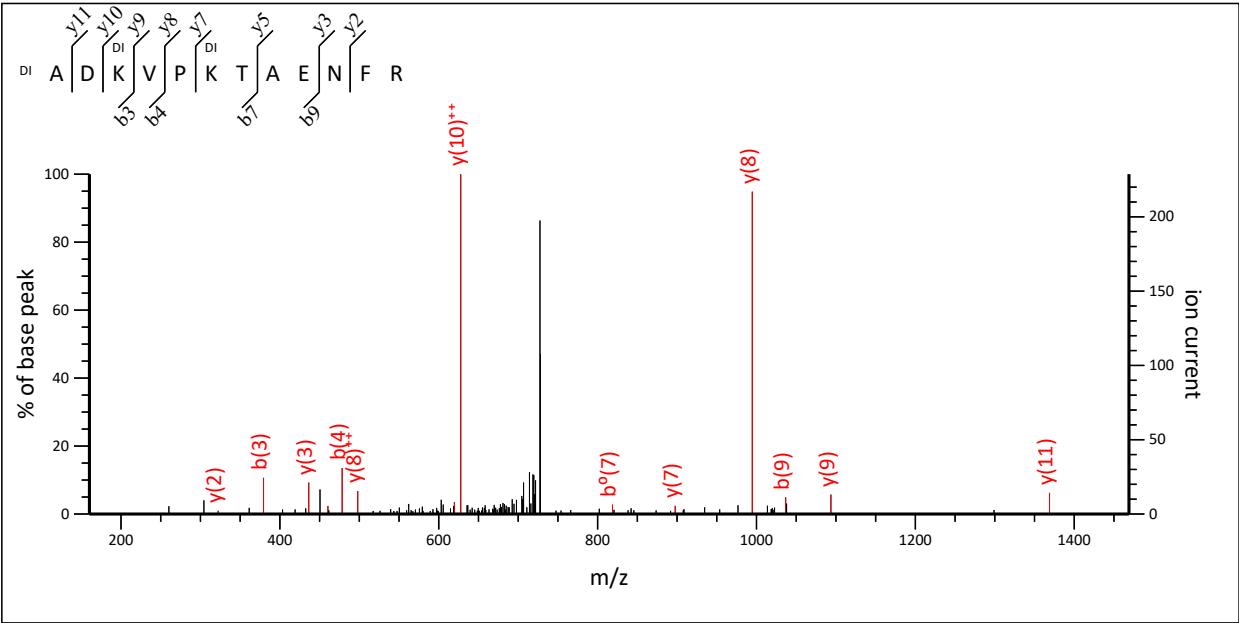





160.24 to 1468.9 



Label all possible matches ☐ Label matches used for scoring ☒

Monoisotopic mass of neutral peptide Mr(calc): 1470.8948  
Variable modifications:  
N-term : Dimethyl:2H(4) (N-term)  
K3 : Dimethyl:2H(4) (K)  
K6 : Dimethyl:2H(4) (K)  
Ions Score: 31 Expect: 25  
Matches : 14/120 fragment ions using 27 most intense peaks ([help](#))

| #  | b         | b <sup>++</sup> | b <sup>*</sup> | b <sup>+++</sup> | b <sup>0</sup> | b <sup>0++</sup> | Seq. | y         | y <sup>++</sup> | y <sup>*</sup> | y <sup>+++</sup> | y <sup>0</sup> | y <sup>0++</sup> | #  |
|----|-----------|-----------------|----------------|------------------|----------------|------------------|------|-----------|-----------------|----------------|------------------|----------------|------------------|----|
| 1  | 104.1008  | 52.5540         |                |                  |                |                  | A    |           |                 |                |                  |                |                  | 12 |
| 2  | 219.1277  | 110.0675        |                |                  | 201.1172       | 101.0622         | D    | 1368.8085 | 684.9079        | 1351.7820      | 676.3946         | 1350.7980      | 675.9026         | 11 |
| 3  | 379.2791  | 190.1432        | 362.2526       | 181.6299         | 361.2685       | 181.1379         | K    | 1253.7816 | 627.3944        | 1236.7550      | 618.8812         | 1235.7710      | 618.3892         | 10 |
| 4  | 478.3475  | 239.6774        | 461.3210       | 231.1641         | 460.3370       | 230.6721         | V    | 1093.6302 | 547.3188        | 1076.6037      | 538.8055         | 1075.6197      | 538.3135         | 9  |
| 5  | 575.4003  | 288.2038        | 558.3737       | 279.6905         | 557.3897       | 279.1985         | P    | 994.5618  | 497.7845        | 977.5353       | 489.2713         | 976.5512       | 488.7793         | 8  |
| 6  | 735.5517  | 368.2795        | 718.5251       | 359.7662         | 717.5411       | 359.2742         | K    | 897.5090  | 449.2582        | 880.4825       | 440.7449         | 879.4985       | 440.2529         | 7  |
| 7  | 836.5993  | 418.8033        | 819.5728       | 410.2900         | 818.5888       | 409.7980         | T    | 737.3577  | 369.1825        | 720.3311       | 360.6692         | 719.3471       | 360.1772         | 6  |
| 8  | 907.6365  | 454.3219        | 890.6099       | 445.8086         | 889.6259       | 445.3166         | A    | 636.3100  | 318.6586        | 619.2835       | 310.1454         | 618.2994       | 309.6534         | 5  |
| 9  | 1036.6790 | 518.8432        | 1019.6525      | 510.3299         | 1018.6685      | 509.8379         | E    | 565.2729  | 283.1401        | 548.2463       | 274.6268         | 547.2623       | 274.1348         | 4  |
| 10 | 1150.7220 | 575.8646        | 1133.6954      | 567.3513         | 1132.7114      | 566.8593         | N    | 436.2303  | 218.6188        | 419.2037       | 210.1055         |                |                  | 3  |
| 11 | 1297.7904 | 649.3988        | 1280.7638      | 640.8856         | 1279.7798      | 640.3935         | F    | 322.1874  | 161.5973        | 305.1608       | 153.0840         |                |                  | 2  |
| 12 |           |                 |                |                  |                |                  | R    | 175.1190  | 88.0631         | 158.0924       | 79.5498          |                |                  | 1  |

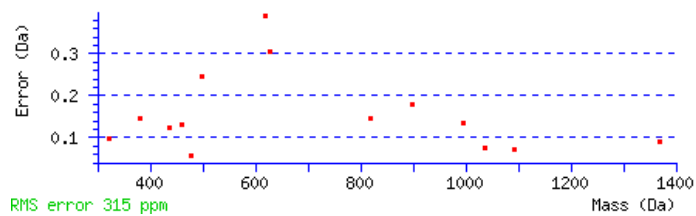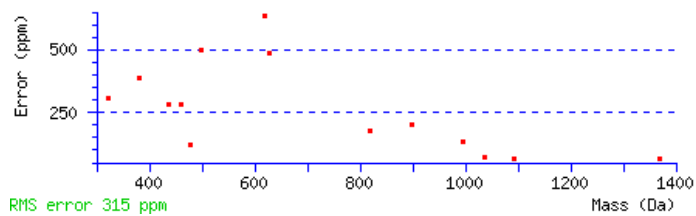

NCBI **BLAST** search of [ADKVPKTAENFR](#)

(Parameters: blastp, nr protein database, expect=20000, no filter, PAM30)

Other BLAST [web gateways](#)

#### All matches to this query

| Score | Mr(calc)  | Delta   | Sequence                        |
|-------|-----------|---------|---------------------------------|
| 30.8  | 1470.8948 | 0.0048  | <a href="#">ADKVPKTAENFR</a>    |
| 23.8  | 1470.7363 | 0.1632  | <a href="#">CSHLCLAVPVGGFV</a>  |
| 21.3  | 1470.8208 | 0.0787  | <a href="#">HRGVPKNIHFNP</a>    |
| 20.2  | 1470.8475 | 0.0520  | <a href="#">TQLVPPQPISTSA</a>   |
| 20.1  | 1470.8458 | 0.0537  | <a href="#">AIFSLGFIIVGSIC</a>  |
| 19.6  | 1470.7970 | 0.1026  | <a href="#">EILLDSKPVSSW</a>    |
| 19.1  | 1470.7719 | 0.1277  | <a href="#">GPPGVPGLDGPKGEP</a> |
| 17.5  | 1470.9523 | -0.0528 | <a href="#">ATSSVADRKLVTK</a>   |
| 17.3  | 1470.8322 | 0.0673  | <a href="#">KSAVWSPSSQFLA</a>   |
| 17.0  | 1470.7261 | 0.1735  | <a href="#">AAFLAMRNGCADA</a>   |

Mascot: <http://www.matrixscience.com/>



# Mascot Search Results

## Peptide View

MS/MS Fragmentation of **ADKVPKTAENFRAL**  
Found in **PPIA\_MOUSE** in **SwissProt**, Peptidyl-prolyl cis-trans isomerase A OS=Mus musculus GN=Ppia PE=1 SV=2

Match to Query 6243: 1642.945362 from(548.655730,3+) intensity(616415.2500) scans(4642) rawscans(sn4642) rtinseconds(1883.5018) index(2746)

Title: 2747: Scan 4642 (rt=1883.5) [C:\Users\Administrador\Desktop\AMOSTRAS NO ORBITRAP LEANDRO RODAR NOVAMENTE\CORTEX\cortex\_01.raw]  
Data file cortex\_01.temp.mgf

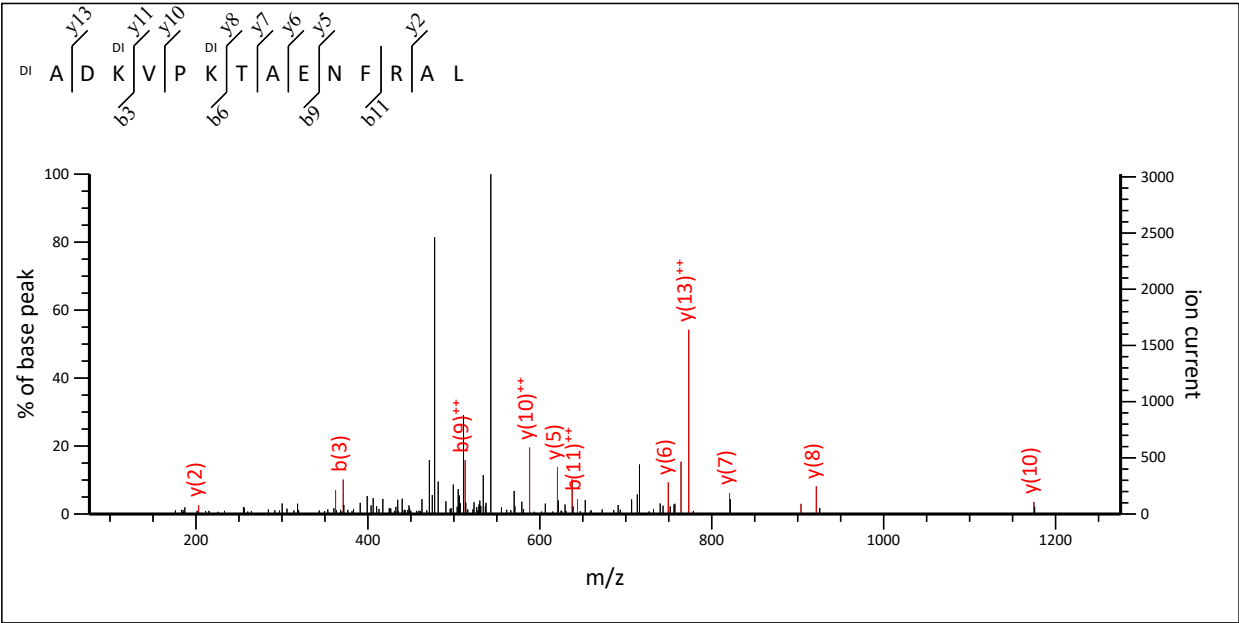



76.06 to 1275.66

Label all possible matches ☐ Label matches used for scoring ☒

Monoisotopic mass of neutral peptide Mr(calc): 1642.9406  
Variable modifications:  
N-term : Dimethyl (N-term)  
K3 : Dimethyl (K)  
K6 : Dimethyl (K)  
Ions Score: 22 Expect: 1.8e+002  
Matches : 16/136 fragment ions using 32 most intense peaks ([help](#))

| #  | b         | b <sup>++</sup> | b <sup>*</sup> | b <sup>+++</sup> | b <sup>0</sup> | b <sup>0++</sup> | Seq. | y         | y <sup>++</sup> | y <sup>*</sup> | y <sup>+++</sup> | y <sup>0</sup> | y <sup>0++</sup> | #  |
|----|-----------|-----------------|----------------|------------------|----------------|------------------|------|-----------|-----------------|----------------|------------------|----------------|------------------|----|
| 1  | 100.0757  | 50.5415         |                |                  |                |                  | A    |           |                 |                |                  |                |                  | 14 |
| 2  | 215.1026  | 108.0550        |                |                  | 197.0921       | 99.0497          | D    | 1544.8795 | 772.9434        | 1527.8530      | 764.4301         | 1526.8689      | 763.9381         | 13 |
| 3  | 371.2289  | 186.1181        | 354.2023       | 177.6048         | 353.2183       | 177.1128         | K    | 1429.8526 | 715.4299        | 1412.8260      | 706.9166         | 1411.8420      | 706.4246         | 12 |
| 4  | 470.2973  | 235.6523        | 453.2708       | 227.1390         | 452.2867       | 226.6470         | V    | 1273.7263 | 637.3668        | 1256.6997      | 628.8535         | 1255.7157      | 628.3615         | 11 |
| 5  | 567.3501  | 284.1787        | 550.3235       | 275.6654         | 549.3395       | 275.1734         | P    | 1174.6579 | 587.8326        | 1157.6313      | 579.3193         | 1156.6473      | 578.8273         | 10 |
| 6  | 723.4763  | 362.2418        | 706.4498       | 353.7285         | 705.4658       | 353.2365         | K    | 1077.6051 | 539.3062        | 1060.5786      | 530.7929         | 1059.5946      | 530.3009         | 9  |
| 7  | 824.5240  | 412.7656        | 807.4975       | 404.2524         | 806.5135       | 403.7604         | T    | 921.4789  | 461.2431        | 904.4523       | 452.7298         | 903.4683       | 452.2378         | 8  |
| 8  | 895.5611  | 448.2842        | 878.5346       | 439.7709         | 877.5506       | 439.2789         | A    | 820.4312  | 410.7192        | 803.4046       | 402.2060         | 802.4206       | 401.7139         | 7  |
| 9  | 1024.6037 | 512.8055        | 1007.5772      | 504.2922         | 1006.5932      | 503.8002         | E    | 749.3941  | 375.2007        | 732.3675       | 366.6874         | 731.3835       | 366.1954         | 6  |
| 10 | 1138.6467 | 569.8270        | 1121.6201      | 561.3137         | 1120.6361      | 560.8217         | N    | 620.3515  | 310.6794        | 603.3249       | 302.1661         |                |                  | 5  |
| 11 | 1285.7151 | 643.3612        | 1268.6885      | 634.8479         | 1267.7045      | 634.3559         | F    | 506.3085  | 253.6579        | 489.2820       | 245.1446         |                |                  | 4  |
| 12 | 1441.8162 | 721.4117        | 1424.7896      | 712.8985         | 1423.8056      | 712.4064         | R    | 359.2401  | 180.1237        | 342.2136       | 171.6104         |                |                  | 3  |
| 13 | 1512.8533 | 756.9303        | 1495.8267      | 748.4170         | 1494.8427      | 747.9250         | A    | 203.1390  | 102.0731        |                |                  |                |                  | 2  |
| 14 |           |                 |                |                  |                |                  | L    | 132.1019  | 66.5546         |                |                  |                |                  | 1  |

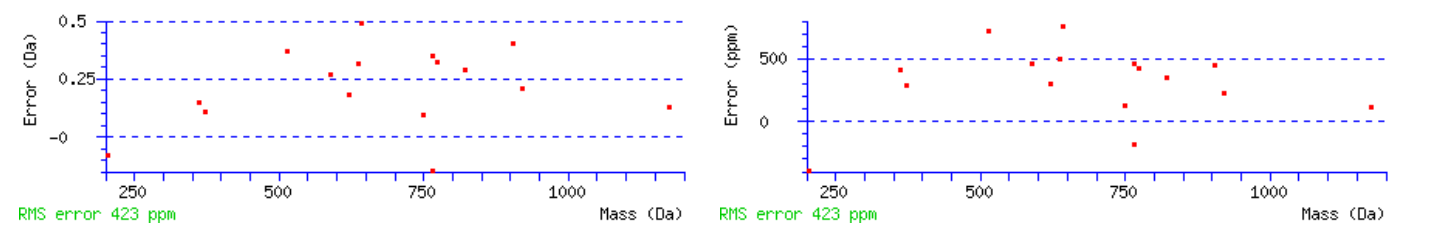

NCBI BLAST search of [ADKVPKTAENFRAL](#)  
(Parameters: blastp, nr protein database, expect=20000, no filter, PAM30)  
Other BLAST [web gateways](#)

All matches to this query

| Score | Mr(calc)  | Delta  | Sequence                         |
|-------|-----------|--------|----------------------------------|
| 22.4  | 1642.9406 | 0.0047 | <a href="#">ADKVPKTAENFRAL</a>   |
| 15.5  | 1642.9082 | 0.0371 | <a href="#">ANKNYYGAAKLIFS</a>   |
| 13.1  | 1642.8501 | 0.0953 | <a href="#">CAPANHTPALPSINPL</a> |
| 12.9  | 1642.7549 | 0.1905 | <a href="#">EFGKYCDDIVNTAA</a>   |
| 12.5  | 1642.8395 | 0.1058 | <a href="#">FFESLAAVNPNETV</a>   |
| 11.7  | 1642.7439 | 0.2015 | <a href="#">DHLPGGESQGCPCGQS</a> |
| 11.4  | 1642.8463 | 0.0991 | <a href="#">LFGYGVLDAAGAMVKM</a> |
| 11.1  | 1642.8342 | 0.1112 | <a href="#">PLTEVIEPLDFEDV</a>   |
| 11.1  | 1642.8050 | 0.1404 | <a href="#">ADPSAQSEGEKVADLA</a> |
| 10.9  | 1642.7303 | 0.2151 | <a href="#">RMNMPISNEDMTV</a>    |

Mascot: <http://www.matrixscience.com/>

### Peptide View

MS/MS Fragmentation of **EDENFILKHTGPGILSM**

Found in **PPIA MOUSE** in **SwissProt**, Peptidyl-prolyl cis-trans isomerase A OS=Mus musculus GN=Ppia PE=1 SV=2

Match to Query 8035: 1956.012148 from(979.013350,2+) intensity(38344.8750) scans(10101) rawscans(sn10101) rtinseconds(3802.4217) index(7458)

Title: 7459: Scan 10101 (rt=3802.42) [C:\Users\Administrador\Desktop\AMOSTRAS NO ORBITRAP LEANDRO RODAR NOVAMENTE\CORTEX\cortex\_01.raw]  
Data file cortex\_01.temp.mgf

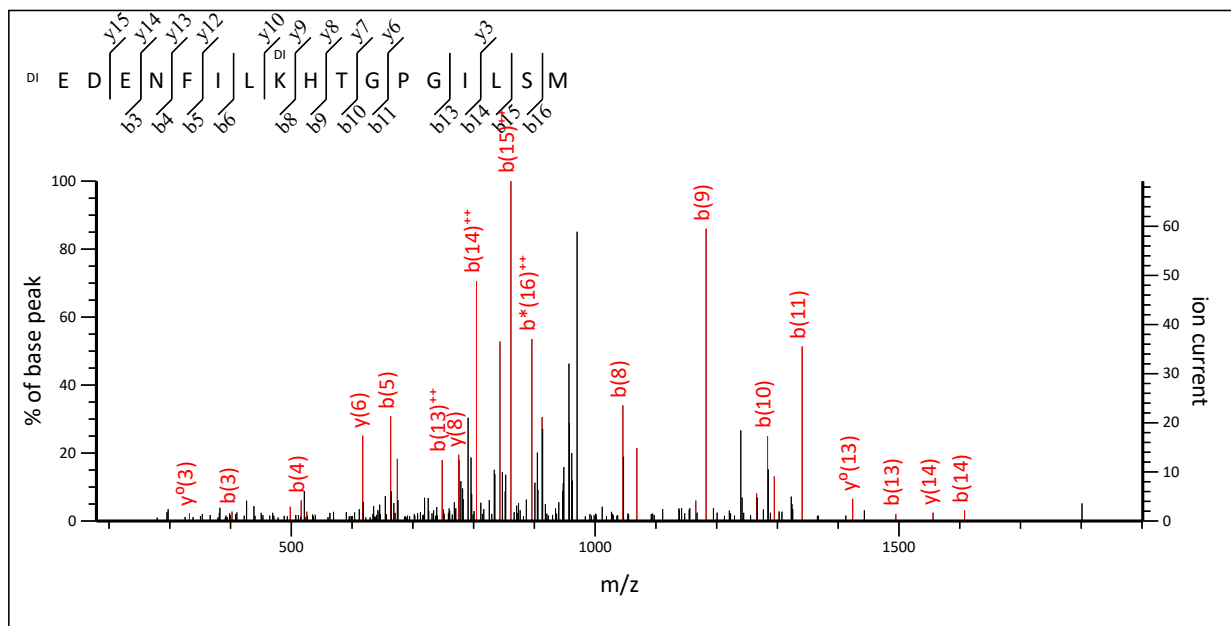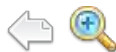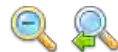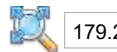

179.29 to 1901.21

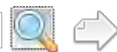

Label all possible matches ☐ Label matches used for scoring ☒

**Monoisotopic mass of neutral peptide Mr(calc): 1956.0026**

Variable modifications:

N-term : Dimethyl (N-term)

Ions Score: 57 Expect: 0.068

Matches : 30/166 fragment ions using 51 most intense peaks ([help](#))

| #  | <b>b</b>  | <b>b<sup>++</sup></b> | <b>b*</b> | <b>b<sup>***</sup></b> | <b>b<sup>0</sup></b> | <b>b<sup>0++</sup></b> | Seq. | y         | y <sup>++</sup> | y*        | y <sup>***</sup> | y <sup>0</sup> | y <sup>0++</sup> | #  |
|----|-----------|-----------------------|-----------|------------------------|----------------------|------------------------|------|-----------|-----------------|-----------|------------------|----------------|------------------|----|
| 1  | 158.0812  | 79.5442               |           |                        | 140.0706             | 70.5389                | E    |           |                 |           |                  |                |                  | 17 |
| 2  | 273.1081  | 137.0577              |           |                        | 255.0975             | 128.0524               | D    | 1799.9360 | 900.4717        | 1782.9095 | 891.9584         | 1781.9255      | 891.4664         | 16 |
| 3  | 402.1507  | 201.5790              |           |                        | 384.1401             | 192.5737               | E    | 1684.9091 | 842.9582        | 1667.8825 | 834.4449         | 1666.8985      | 833.9529         | 15 |
| 4  | 516.1936  | 258.6005              | 499.1671  | 250.0872               | 498.1831             | 249.5952               | N    | 1555.8665 | 778.4369        | 1538.8399 | 769.9236         | 1537.8559      | 769.4316         | 14 |
| 5  | 663.2620  | 332.1347              | 646.2355  | 323.6214               | 645.2515             | 323.1294               | F    | 1441.8236 | 721.4154        | 1424.7970 | 712.9021         | 1423.8130      | 712.4101         | 13 |
| 6  | 776.3461  | 388.6767              | 759.3196  | 380.1634               | 758.3355             | 379.6714               | I    | 1294.7552 | 647.8812        | 1277.7286 | 639.3679         | 1276.7446      | 638.8759         | 12 |
| 7  | 889.4302  | 445.2187              | 872.4036  | 436.7055               | 871.4196             | 436.2134               | L    | 1181.6711 | 591.3392        | 1164.6445 | 582.8259         | 1163.6605      | 582.3339         | 11 |
| 8  | 1045.5564 | 523.2819              | 1028.5299 | 514.7686               | 1027.5459            | 514.2766               | K    | 1068.5870 | 534.7972        | 1051.5605 | 526.2839         | 1050.5765      | 525.7919         | 10 |
| 9  | 1182.6153 | 591.8113              | 1165.5888 | 583.2980               | 1164.6048            | 582.8060               | H    | 912.4608  | 456.7340        |           |                  | 894.4502       | 447.7287         | 9  |
| 10 | 1283.6630 | 642.3352              | 1266.6365 | 633.8219               | 1265.6525            | 633.3299               | T    | 775.4019  | 388.2046        |           |                  | 757.3913       | 379.1993         | 8  |
| 11 | 1340.6845 | 670.8459              | 1323.6579 | 662.3326               | 1322.6739            | 661.8406               | G    | 674.3542  | 337.6807        |           |                  | 656.3436       | 328.6754         | 7  |
| 12 | 1437.7373 | 719.3723              | 1420.7107 | 710.8590               | 1419.7267            | 710.3670               | P    | 617.3327  | 309.1700        |           |                  | 599.3221       | 300.1647         | 6  |
| 13 | 1494.7587 | 747.8830              | 1477.7322 | 739.3697               | 1476.7482            | 738.8777               | G    | 520.2799  | 260.6436        |           |                  | 502.2694       | 251.6383         | 5  |
| 14 | 1607.8428 | 804.4250              | 1590.8162 | 795.9118               | 1589.8322            | 795.4197               | I    | 463.2585  | 232.1329        |           |                  | 445.2479       | 223.1276         | 4  |
| 15 | 1720.9268 | 860.9671              | 1703.9003 | 852.4538               | 1702.9163            | 851.9618               | L    | 350.1744  | 175.5908        |           |                  | 332.1639       | 166.5856         | 3  |
| 16 | 1807.9589 | 904.4831              | 1790.9323 | 895.9698               | 1789.9483            | 895.4778               | S    | 237.0904  | 119.0488        |           |                  | 219.0798       | 110.0435         | 2  |
| 17 |           |                       |           |                        |                      |                        | M    | 150.0583  | 75.5328         |           |                  |                |                  | 1  |

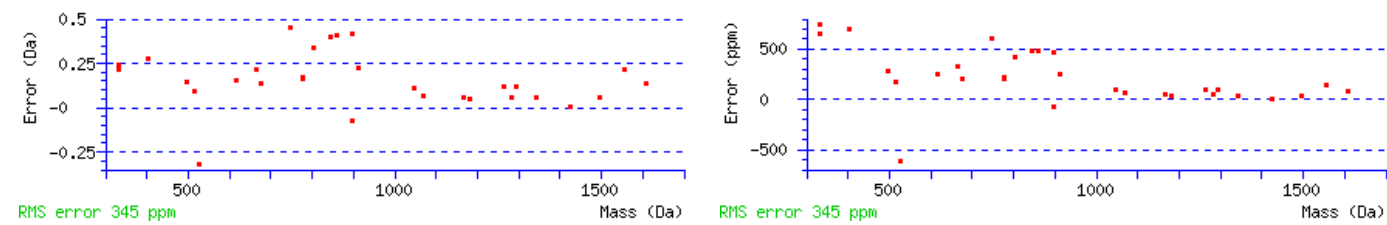

NCBI **BLAST** search of [EDENFILKHTGPGILSM](#)  
(Parameters: blastp, nr protein database, expect=20000, no filter, PAM30)  
Other BLAST [web gateways](#)

All matches to this query

| Score | Mr(calc)  | Delta   | Sequence                            |
|-------|-----------|---------|-------------------------------------|
| 56.8  | 1956.0026 | 0.0095  | <a href="#">EDENFILKHTGPGILSM</a>   |
| 20.0  | 1955.9375 | 0.0747  | <a href="#">CDVNHQNRAGYSALMLA</a>   |
| 18.3  | 1955.9741 | 0.0380  | <a href="#">WNSGSLSSGVHTFPAVLQ</a>  |
| 18.2  | 1956.0608 | -0.0487 | <a href="#">APLPAPGTSALFTFSPLTV</a> |
| 17.3  | 1955.8801 | 0.1321  | <a href="#">DAREQEIRMGQMAMGGA</a>   |
| 14.1  | 1956.1913 | -0.1792 | <a href="#">TVLLAPRQPQSLIVTER</a>   |
| 13.3  | 1956.2739 | -0.2618 | <a href="#">PLPTATTGNVHTAKKISI</a>  |
| 12.7  | 1955.8306 | 0.1816  | <a href="#">LLEMDSESEDPRDTE</a>     |
| 12.3  | 1956.0793 | -0.0671 | <a href="#">FINATTGIVTVNRPLDR</a>   |
| 12.1  | 1955.9193 | 0.0928  | <a href="#">QASGNMGTPPTMTRVPGP</a>  |

Mascot: <http://www.matrixscience.com/>

Mascot Search Results

Peptide View

MS/MS Fragmentation of **ELFADKVPKTAENFRAL**  
Found in **PPIA\_MOUSE** in **SwissProt**, Peptidyl-prolyl cis-trans isomerase A OS=Mus musculus GN=Ppia PE=1 SV=2

Match to Query 8470: 2032.131582 from(678.384470,3+) intensity(105163.0900) scans(8156) rawscans(sn8156) rtinseconds(3115.0489) index(5804)  
Title: 5805: Scan 8156 (rt=3115.05) [C:\Users\Administrador\Desktop\AMOSTRAS NO ORBITRAP LEANDRO RODAR NOVAMENTE\CORTEX\cortex\_01.raw]  
Data file cortex\_01.temp.mgf

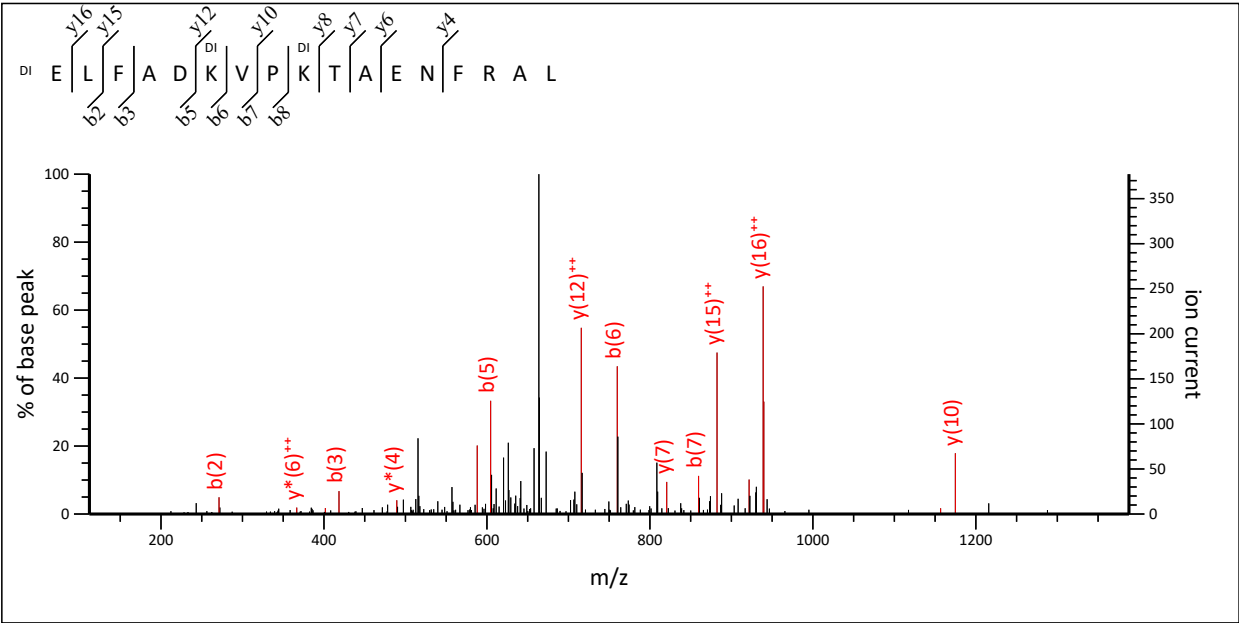

Navigation icons: ? (help), zoom in, zoom out, zoom reset, pan, and a range selector showing 112.17 to 1387.89.

Label all possible matches ☐ Label matches used for scoring ☒

Monoisotopic mass of neutral peptide Mr(calc): 2032.1357  
Variable modifications:  
N-term : Dimethyl (N-term)  
K6 : Dimethyl (K)  
K9 : Dimethyl (K)  
Ions Score: 29 Expect: 40  
Matches : 21/168 fragment ions using 29 most intense peaks (help)

| #  | b         | b <sup>++</sup> | b <sup>*</sup> | b <sup>+++</sup> | b <sup>0</sup> | b <sup>0++</sup> | Seq. | y         | y <sup>++</sup> | y <sup>*</sup> | y <sup>+++</sup> | y <sup>0</sup> | y <sup>0++</sup> | #  |
|----|-----------|-----------------|----------------|------------------|----------------|------------------|------|-----------|-----------------|----------------|------------------|----------------|------------------|----|
| 1  | 158.0812  | 79.5442         |                |                  | 140.0706       | 70.5389          | E    |           |                 |                |                  |                |                  | 17 |
| 2  | 271.1652  | 136.0863        |                |                  | 253.1547       | 127.0810         | L    | 1876.0691 | 938.5382        | 1859.0425      | 930.0249         | 1858.0585      | 929.5329         | 16 |
| 3  | 418.2336  | 209.6205        |                |                  | 400.2231       | 200.6152         | F    | 1762.9850 | 881.9962        | 1745.9585      | 873.4829         | 1744.9745      | 872.9909         | 15 |
| 4  | 489.2708  | 245.1390        |                |                  | 471.2602       | 236.1337         | A    | 1615.9166 | 808.4619        | 1598.8901      | 799.9487         | 1597.9061      | 799.4567         | 14 |
| 5  | 604.2977  | 302.6525        |                |                  | 586.2871       | 293.6472         | D    | 1544.8795 | 772.9434        | 1527.8530      | 764.4301         | 1526.8689      | 763.9381         | 13 |
| 6  | 760.4240  | 380.7156        | 743.3974       | 372.2023         | 742.4134       | 371.7103         | K    | 1429.8526 | 715.4299        | 1412.8260      | 706.9166         | 1411.8420      | 706.4246         | 12 |
| 7  | 859.4924  | 430.2498        | 842.4658       | 421.7366         | 841.4818       | 421.2445         | V    | 1273.7263 | 637.3668        | 1256.6997      | 628.8535         | 1255.7157      | 628.3615         | 11 |
| 8  | 956.5451  | 478.7762        | 939.5186       | 470.2629         | 938.5346       | 469.7709         | P    | 1174.6579 | 587.8326        | 1157.6313      | 579.3193         | 1156.6473      | 578.8273         | 10 |
| 9  | 1112.6714 | 556.8393        | 1095.6449      | 548.3261         | 1094.6608      | 547.8341         | K    | 1077.6051 | 539.3062        | 1060.5786      | 530.7929         | 1059.5946      | 530.3009         | 9  |
| 10 | 1213.7191 | 607.3632        | 1196.6925      | 598.8499         | 1195.7085      | 598.3579         | T    | 921.4789  | 461.2431        | 904.4523       | 452.7298         | 903.4683       | 452.2378         | 8  |
| 11 | 1284.7562 | 642.8817        | 1267.7297      | 634.3685         | 1266.7456      | 633.8765         | A    | 820.4312  | 410.7192        | 803.4046       | 402.2060         | 802.4206       | 401.7139         | 7  |
| 12 | 1413.7988 | 707.4030        | 1396.7722      | 698.8898         | 1395.7882      | 698.3978         | E    | 749.3941  | 375.2007        | 732.3675       | 366.6874         | 731.3835       | 366.1954         | 6  |
| 13 | 1527.8417 | 764.4245        | 1510.8152      | 755.9112         | 1509.8312      | 755.4192         | N    | 620.3515  | 310.6794        | 603.3249       | 302.1661         |                |                  | 5  |
| 14 | 1674.9101 | 837.9587        | 1657.8836      | 829.4454         | 1656.8996      | 828.9534         | F    | 506.3085  | 253.6579        | 489.2820       | 245.1446         |                |                  | 4  |
| 15 | 1831.0112 | 916.0093        | 1813.9847      | 907.4960         | 1813.0007      | 907.0040         | R    | 359.2401  | 180.1237        | 342.2136       | 171.6104         |                |                  | 3  |
| 16 | 1902.0484 | 951.5278        | 1885.0218      | 943.0145         | 1884.0378      | 942.5225         | A    | 203.1390  | 102.0731        |                |                  |                |                  | 2  |
| 17 |           |                 |                |                  |                |                  | L    | 132.1019  | 66.5546         |                |                  |                |                  | 1  |

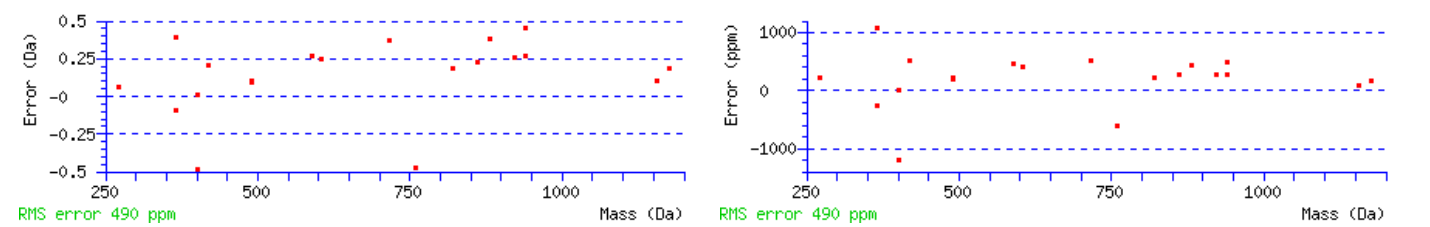

NCBI BLAST search of [ELFADKVPKTAENFRAL](#)  
(Parameters: blastp, nr protein database, expect=20000, no filter, PAM30)  
Other BLAST [web gateways](#)

All matches to this query

| Score | Mr(calc)  | Delta   | Sequence                               |
|-------|-----------|---------|----------------------------------------|
| 29.1  | 2032.1357 | -0.0041 | <a href="#">ELFADKVPKTAENFRAL</a>      |
| 19.4  | 2032.1834 | -0.0518 | <a href="#">SLLHHGGFKVLQSLKGSV</a>     |
| 17.6  | 2032.0561 | 0.0755  | <a href="#">TQNADCVVVLDNTALNRI</a>     |
| 17.0  | 2032.0486 | 0.0830  | <a href="#">HSLLGPIILSCVAVCEVIDH</a>   |
| 17.0  | 2032.0661 | 0.0654  | <a href="#">SVSVARSSGNSGGLGRISGIGS</a> |
| 16.6  | 2031.9935 | 0.1381  | <a href="#">EDVENLIHVQIEAMIDH</a>      |
| 15.7  | 2031.9281 | 0.2035  | <a href="#">EALLYCNIPSVAEHSMEG</a>     |
| 15.4  | 2032.0088 | 0.1228  | <a href="#">GANVSEQCETKGNPPPAIF</a>    |
| 14.9  | 2032.1066 | 0.0250  | <a href="#">EWGKDTARRLGSTTVGSK</a>     |
| 14.8  | 2032.0854 | 0.0462  | <a href="#">SLPVHVRNLWEVAGRT</a>       |

Mascot: <http://www.matrixscience.com/>

# Mascot Search Results

## Peptide View

MS/MS Fragmentation of **ELFADKVPKTAENF**  
Found in **PPIA\_MOUSE** in **SwissProt**, Peptidyl-prolyl cis-trans isomerase A OS=Mus musculus GN=Ppia PE=1 SV=2

Match to Query 6637: 1703.953268 from(852.983910,2+) intensity(16920.4360) scans(7272) rawscans(sn7272) rtinseconds(2795.1865) index(5073)

Title: 5074: Scan 7272 (rt=2795.19) [C:\Users\Administrador\Desktop\AMOSTRAS NO ORBITRAP LEANDRO RODAR NOVAMENTE\CORTEX\cortex\_01.raw]  
Data file cortex\_01.temp.mgf

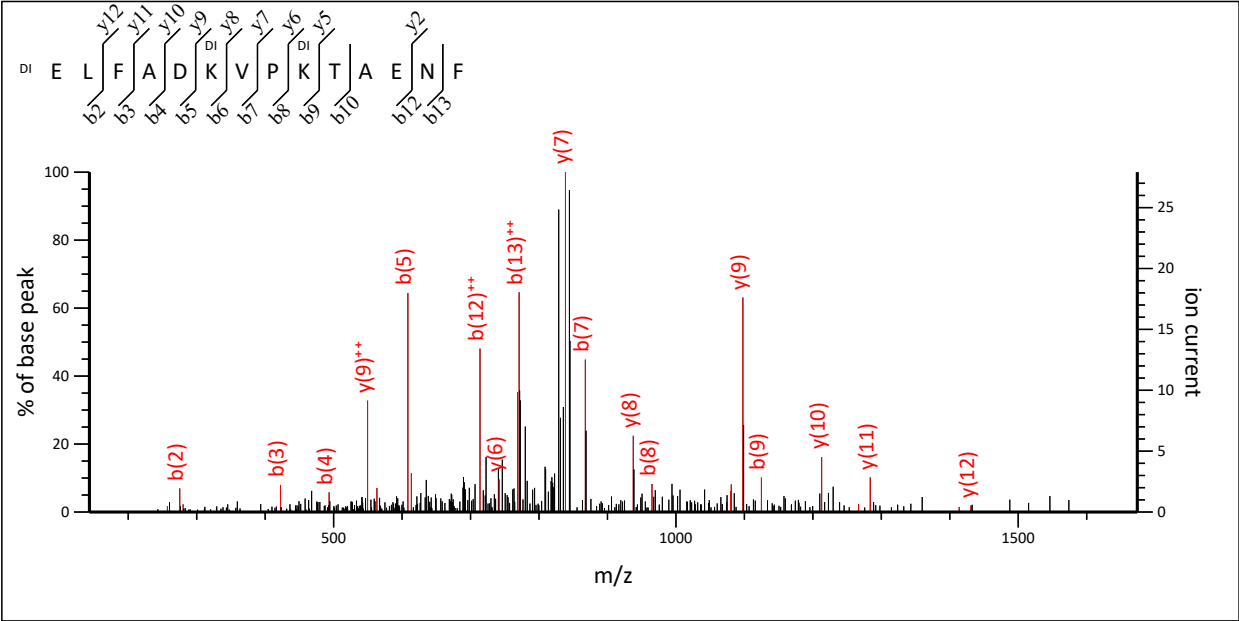



143.3 to 1673.93



Label all possible matches ☐ Label matches used for scoring ☒

Monoisotopic mass of neutral peptide Mr(calc): 1703.9887  
Variable modifications:  
N-term : Dimethyl:2H(4) (N-term)  
K6 : Dimethyl:2H(4) (K)  
K9 : Dimethyl:2H(4) (K)  
Ions Score: 34 Expect: 12  
Matches : 29/140 fragment ions using 63 most intense peaks ([help](#))

| #  | b         | b <sup>++</sup> | b <sup>*</sup> | b <sup>+++</sup> | b <sup>0</sup> | b <sup>0++</sup> | Seq. | y         | y <sup>++</sup> | y <sup>*</sup> | y <sup>+++</sup> | y <sup>0</sup> | y <sup>0++</sup> | #  |
|----|-----------|-----------------|----------------|------------------|----------------|------------------|------|-----------|-----------------|----------------|------------------|----------------|------------------|----|
| 1  | 162.1063  | 81.5568         |                |                  | 144.0957       | 72.5515          | E    |           |                 |                |                  |                |                  | 14 |
| 2  | 275.1903  | 138.0988        |                |                  | 257.1798       | 129.0935         | L    | 1543.8970 | 772.4521        | 1526.8705      | 763.9389         | 1525.8865      | 763.4469         | 13 |
| 3  | 422.2588  | 211.6330        |                |                  | 404.2482       | 202.6277         | F    | 1430.8130 | 715.9101        | 1413.7864      | 707.3968         | 1412.8024      | 706.9048         | 12 |
| 4  | 493.2959  | 247.1516        |                |                  | 475.2853       | 238.1463         | A    | 1283.7445 | 642.3759        | 1266.7180      | 633.8626         | 1265.7340      | 633.3706         | 11 |
| 5  | 608.3228  | 304.6650        |                |                  | 590.3122       | 295.6598         | D    | 1212.7074 | 606.8574        | 1195.6809      | 598.3441         | 1194.6969      | 597.8521         | 10 |
| 6  | 768.4742  | 384.7407        | 751.4476       | 376.2275         | 750.4636       | 375.7354         | K    | 1097.6805 | 549.3439        | 1080.6539      | 540.8306         | 1079.6699      | 540.3386         | 9  |
| 7  | 867.5426  | 434.2749        | 850.5160       | 425.7617         | 849.5320       | 425.2697         | V    | 937.5291  | 469.2682        | 920.5026       | 460.7549         | 919.5186       | 460.2629         | 8  |
| 8  | 964.5954  | 482.8013        | 947.5688       | 474.2880         | 946.5848       | 473.7960         | P    | 838.4607  | 419.7340        | 821.4342       | 411.2207         | 820.4501       | 410.7287         | 7  |
| 9  | 1124.7467 | 562.8770        | 1107.7202      | 554.3637         | 1106.7362      | 553.8717         | K    | 741.4079  | 371.2076        | 724.3814       | 362.6943         | 723.3974       | 362.2023         | 6  |
| 10 | 1225.7944 | 613.4008        | 1208.7679      | 604.8876         | 1207.7838      | 604.3956         | T    | 581.2566  | 291.1319        | 564.2300       | 282.6186         | 563.2460       | 282.1266         | 5  |
| 11 | 1296.8315 | 648.9194        | 1279.8050      | 640.4061         | 1278.8210      | 639.9141         | A    | 480.2089  | 240.6081        | 463.1823       | 232.0948         | 462.1983       | 231.6028         | 4  |
| 12 | 1425.8741 | 713.4407        | 1408.8476      | 704.9274         | 1407.8636      | 704.4354         | E    | 409.1718  | 205.0895        | 392.1452       | 196.5763         | 391.1612       | 196.0842         | 3  |
| 13 | 1539.9170 | 770.4622        | 1522.8905      | 761.9489         | 1521.9065      | 761.4569         | N    | 280.1292  | 140.5682        | 263.1026       | 132.0550         |                |                  | 2  |
| 14 |           |                 |                |                  |                |                  | F    | 166.0863  | 83.5468         |                |                  |                |                  | 1  |

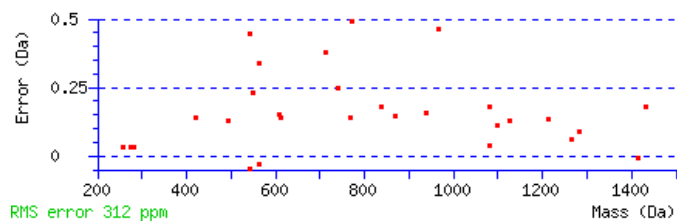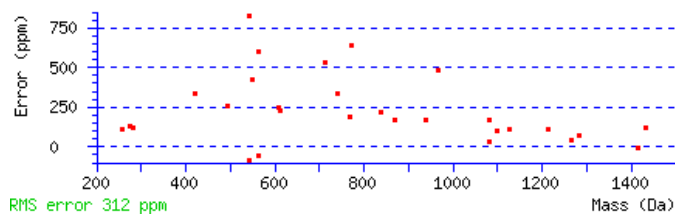

NCBI **BLAST** search of [ELFADKVPKTAENF](#)

(Parameters: blastp, nr protein database, expect=20000, no filter, PAM30)

Other BLAST [web gateways](#)

**All matches to this query**

| Score | Mr(calc)  | Delta   | Sequence                        |
|-------|-----------|---------|---------------------------------|
| 34.2  | 1703.9887 | -0.0355 | <a href="#">ELFADKVPKTAENF</a>  |
| 19.6  | 1703.8687 | 0.0846  | <a href="#">GQDFQCRETGRCLK</a>  |
| 17.5  | 1703.9375 | 0.0158  | <a href="#">VITFDKGGTWEFLQ</a>  |
| 17.4  | 1703.9959 | -0.0427 | <a href="#">EIAKEHDLPPAKSR</a>  |
| 16.4  | 1703.8565 | 0.0968  | <a href="#">SWSSQNVLMFMTLL</a>  |
| 15.7  | 1703.9591 | -0.0058 | <a href="#">QGCISKDKVDTLIM</a>  |
| 15.7  | 1703.8528 | 0.1005  | <a href="#">DLQKMSDAAGDFVDI</a> |
| 15.0  | 1703.8930 | 0.0603  | <a href="#">SIAATDHEPTDARKS</a> |
| 14.2  | 1703.9259 | 0.0274  | <a href="#">SFIINLFVMAVEGQA</a> |
| 13.8  | 1703.8781 | 0.0752  | <a href="#">IFSADRPNVQDQLQ</a>  |

Mascot: <http://www.matrixscience.com/>



# Mascot Search Results

## Peptide View

MS/MS Fragmentation of **ITADDEPLGRVSF**  
Found in **PPIA\_MOUSE** in **SwissProt**, Peptidyl-prolyl cis-trans isomerase A OS=Mus musculus GN=Ppia PE=1 SV=2

Match to Query 4721: 1450.766908 from(726.390730,2+) intensity(48205.5000) scans(8533) rawscans(sn8533) rtinseconds(3217.248) index(6069)  
Title: 6070: Scan 8533 (rt=3217.25) [C:\Users\Administrador\Desktop\AMOSTRAS NO ORBITRAP LEANDRO RODAR NOVAMENTE\HIPOCAMPO\hipocampo\_01.raw]  
Data file hipocampo\_01.temp.mgf

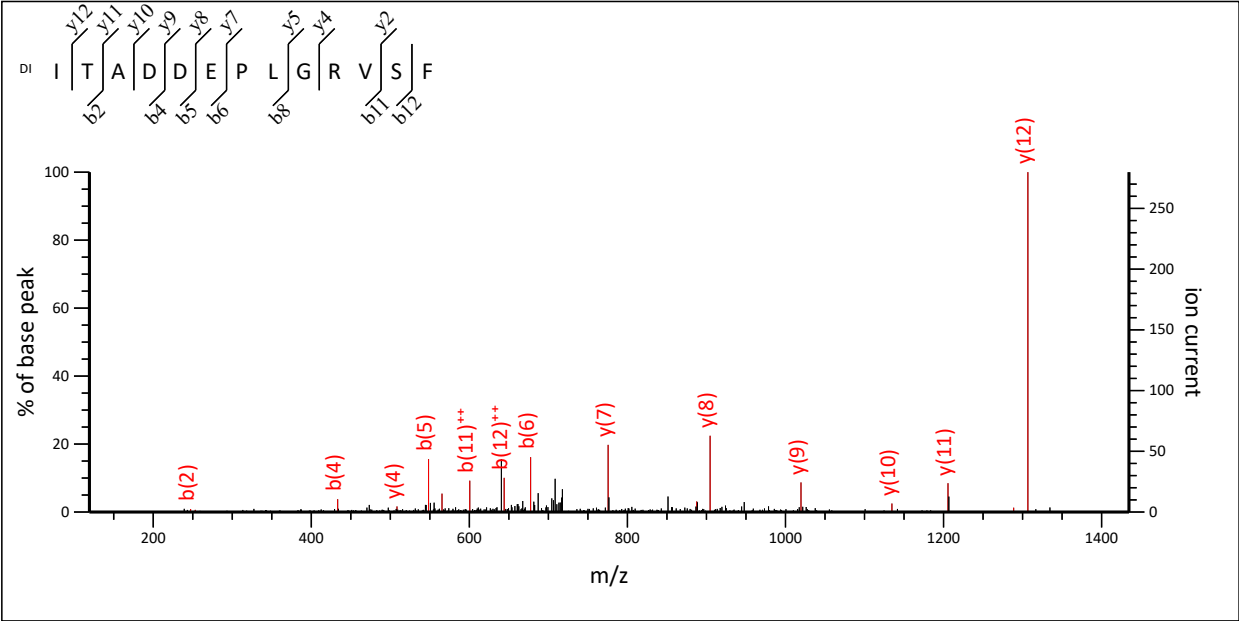

Navigation icons: ? (help), zoom in, zoom out, zoom reset, pan, 119.26 to 1434.61, zoom reset, pan.

Label all possible matches ☐ Label matches used for scoring ☒

Monoisotopic mass of neutral peptide Mr(calc): 1450.7606  
Variable modifications:  
N-term : Dimethyl:2H(4) (N-term)  
Ions Score: 55 Expect: 0.098  
Matches : 19/116 fragment ions using 34 most intense peaks ([help](#))

| #  | b         | b <sup>++</sup> | b <sup>*</sup> | b <sup>+++</sup> | b <sup>0</sup> | b <sup>0++</sup> | Seq. | y         | y <sup>++</sup> | y <sup>*</sup> | y <sup>+++</sup> | y <sup>0</sup> | y <sup>0++</sup> | #  |
|----|-----------|-----------------|----------------|------------------|----------------|------------------|------|-----------|-----------------|----------------|------------------|----------------|------------------|----|
| 1  | 146.1477  | 73.5775         |                |                  |                |                  | I    |           |                 |                |                  |                |                  | 13 |
| 2  | 247.1954  | 124.1014        |                |                  | 229.1849       | 115.0961         | T    | 1306.6274 | 653.8173        | 1289.6008      | 645.3040         | 1288.6168      | 644.8120         | 12 |
| 3  | 318.2325  | 159.6199        |                |                  | 300.2220       | 150.6146         | A    | 1205.5797 | 603.2935        | 1188.5531      | 594.7802         | 1187.5691      | 594.2882         | 11 |
| 4  | 433.2595  | 217.1334        |                |                  | 415.2489       | 208.1281         | D    | 1134.5426 | 567.7749        | 1117.5160      | 559.2617         | 1116.5320      | 558.7696         | 10 |
| 5  | 548.2864  | 274.6469        |                |                  | 530.2759       | 265.6416         | D    | 1019.5156 | 510.2615        | 1002.4891      | 501.7482         | 1001.5051      | 501.2562         | 9  |
| 6  | 677.3290  | 339.1681        |                |                  | 659.3185       | 330.1629         | E    | 904.4887  | 452.7480        | 887.4621       | 444.2347         | 886.4781       | 443.7427         | 8  |
| 7  | 774.3818  | 387.6945        |                |                  | 756.3712       | 378.6892         | P    | 775.4461  | 388.2267        | 758.4196       | 379.7134         | 757.4355       | 379.2214         | 7  |
| 8  | 887.4658  | 444.2366        |                |                  | 869.4553       | 435.2313         | L    | 678.3933  | 339.7003        | 661.3668       | 331.1870         | 660.3828       | 330.6950         | 6  |
| 9  | 944.4873  | 472.7473        |                |                  | 926.4767       | 463.7420         | G    | 565.3093  | 283.1583        | 548.2827       | 274.6450         | 547.2987       | 274.1530         | 5  |
| 10 | 1100.5884 | 550.7978        | 1083.5619      | 542.2846         | 1082.5779      | 541.7926         | R    | 508.2878  | 254.6475        | 491.2613       | 246.1343         | 490.2772       | 245.6423         | 4  |
| 11 | 1199.6568 | 600.3321        | 1182.6303      | 591.8188         | 1181.6463      | 591.3268         | V    | 352.1867  | 176.5970        |                |                  | 334.1761       | 167.5917         | 3  |
| 12 | 1286.6889 | 643.8481        | 1269.6623      | 635.3348         | 1268.6783      | 634.8428         | S    | 253.1183  | 127.0628        |                |                  | 235.1077       | 118.0575         | 2  |
| 13 |           |                 |                |                  |                |                  | F    | 166.0863  | 83.5468         |                |                  |                |                  | 1  |

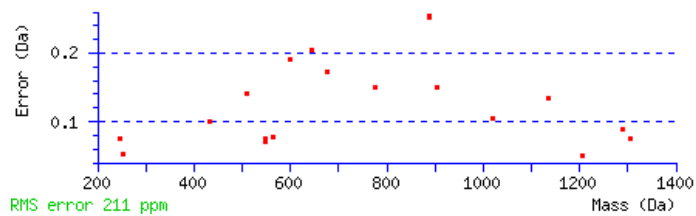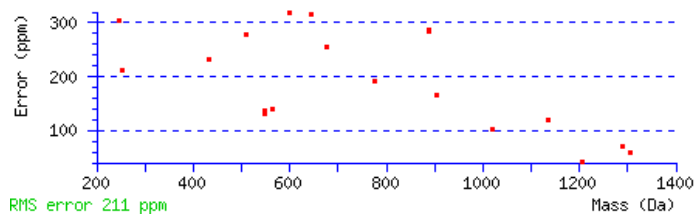

NCBI **BLAST** search of [ITADDEPLGRVSE](#)

(Parameters: blastp, nr protein database, expect=20000, no filter, PAM30)

Other BLAST [web gateways](#)

#### All matches to this query

| Score | Mr(calc)  | Delta   | Sequence                       |
|-------|-----------|---------|--------------------------------|
| 54.9  | 1450.7606 | 0.0063  | <a href="#">ITADDEPLGRVSE</a>  |
| 29.0  | 1450.7672 | -0.0003 | <a href="#">MAGHDEAVLFVQV</a>  |
| 28.4  | 1450.8316 | -0.0647 | <a href="#">GCQLIKFDSVEV</a>   |
| 26.7  | 1450.7809 | -0.0140 | <a href="#">VIRTRAEDGDL</a>    |
| 25.3  | 1450.7250 | 0.0419  | <a href="#">LMWNREDALMV</a>    |
| 24.8  | 1450.7730 | -0.0061 | <a href="#">IFKANHPMDAEV</a>   |
| 22.9  | 1450.8119 | -0.0450 | <a href="#">LEGKANGGLVDSEV</a> |
| 22.3  | 1450.7282 | 0.0387  | <a href="#">LTYPPGGWDEVSV</a>  |
| 21.1  | 1450.7765 | -0.0096 | <a href="#">AVRFRAMPRGNS</a>   |
| 21.1  | 1450.8231 | -0.0562 | <a href="#">LAESDEAKVQRAA</a>  |

Mascot: <http://www.matrixscience.com/>

# Mascot Search Results

## Peptide View

MS/MS Fragmentation of **LFADKVPKTAENF**  
Found in **PPIA\_MOUSE** in **SwissProt**, Peptidyl-prolyl cis-trans isomerase A OS=Mus musculus GN=Ppia PE=1 SV=2

Match to Query 5336: 1562.875962 from(521.965930,3+) intensity(66458.7810) scans(6289) rawscans(sn6289) rtinseconds(2422.4935) index(4162)

Title: 4163: Scan 6289 (rt=2422.49) [C:\Users\Administrador\Desktop\AMOSTRAS NO ORBITRAP LEANDRO RODAR NOVAMENTE\HIPOCAMPO\hipocampo\_01.raw]  
Data file hipocampo\_01.temp.mgf

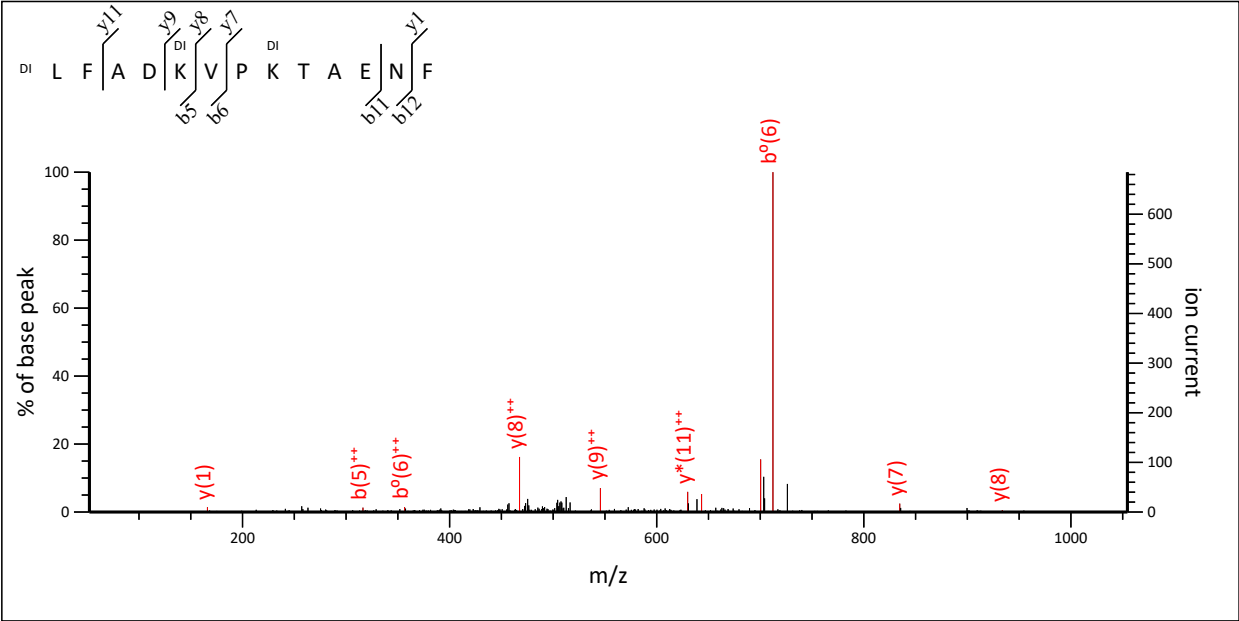

 to 

Label all possible matches ☐ Label matches used for scoring ☒

Monoisotopic mass of neutral peptide Mr(calc): 1562.8708  
Variable modifications:  
N-term : Dimethyl (N-term)  
K5 : Dimethyl (K)  
K8 : Dimethyl (K)  
Ions Score: 20 Expect: 2.9e+002  
Matches : 12/124 fragment ions using 17 most intense peaks ([help](#))

| #  | b         | b <sup>++</sup> | b <sup>*</sup> | b <sup>+++</sup> | b <sup>0</sup> | b <sup>0++</sup> | Seq. | y         | y <sup>++</sup> | y <sup>*</sup> | y <sup>+++</sup> | y <sup>0</sup> | y <sup>0++</sup> | #  |
|----|-----------|-----------------|----------------|------------------|----------------|------------------|------|-----------|-----------------|----------------|------------------|----------------|------------------|----|
| 1  | 142.1226  | 71.5650         |                |                  |                |                  | L    |           |                 |                |                  |                |                  | 13 |
| 2  | 289.1911  | 145.0992        |                |                  |                |                  | F    | 1422.7627 | 711.8850        | 1405.7362      | 703.3717         | 1404.7522      | 702.8797         | 12 |
| 3  | 360.2282  | 180.6177        |                |                  |                |                  | A    | 1275.6943 | 638.3508        | 1258.6678      | 629.8375         | 1257.6838      | 629.3455         | 11 |
| 4  | 475.2551  | 238.1312        |                |                  | 457.2445       | 229.1259         | D    | 1204.6572 | 602.8322        | 1187.6307      | 594.3190         | 1186.6466      | 593.8270         | 10 |
| 5  | 631.3814  | 316.1943        | 614.3548       | 307.6811         | 613.3708       | 307.1890         | K    | 1089.6303 | 545.3188        | 1072.6037      | 536.8055         | 1071.6197      | 536.3135         | 9  |
| 6  | 730.4498  | 365.7285        | 713.4232       | 357.2153         | 712.4392       | 356.7232         | V    | 933.5040  | 467.2556        | 916.4775       | 458.7424         | 915.4934       | 458.2504         | 8  |
| 7  | 827.5026  | 414.2549        | 810.4760       | 405.7416         | 809.4920       | 405.2496         | P    | 834.4356  | 417.7214        | 817.4090       | 409.2082         | 816.4250       | 408.7162         | 7  |
| 8  | 983.6288  | 492.3180        | 966.6023       | 483.8048         | 965.6182       | 483.3128         | K    | 737.3828  | 369.1951        | 720.3563       | 360.6818         | 719.3723       | 360.1898         | 6  |
| 9  | 1084.6765 | 542.8419        | 1067.6499      | 534.3286         | 1066.6659      | 533.8366         | T    | 581.2566  | 291.1319        | 564.2300       | 282.6186         | 563.2460       | 282.1266         | 5  |
| 10 | 1155.7136 | 578.3604        | 1138.6871      | 569.8472         | 1137.7030      | 569.3552         | A    | 480.2089  | 240.6081        | 463.1823       | 232.0948         | 462.1983       | 231.6028         | 4  |
| 11 | 1284.7562 | 642.8817        | 1267.7297      | 634.3685         | 1266.7456      | 633.8765         | E    | 409.1718  | 205.0895        | 392.1452       | 196.5763         | 391.1612       | 196.0842         | 3  |
| 12 | 1398.7991 | 699.9032        | 1381.7726      | 691.3899         | 1380.7886      | 690.8979         | N    | 280.1292  | 140.5682        | 263.1026       | 132.0550         |                |                  | 2  |
| 13 |           |                 |                |                  |                |                  | F    | 166.0863  | 83.5468         |                |                  |                |                  | 1  |

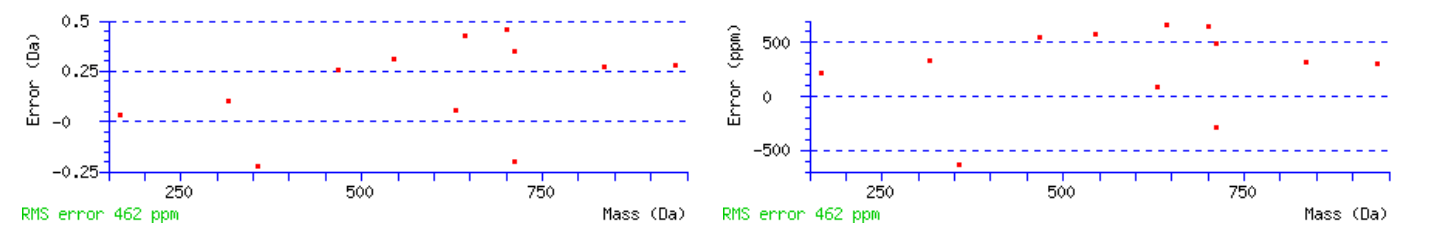

NCBI BLAST search of [LFADKVPKTAENF](#)  
(Parameters: blastp, nr protein database, expect=20000, no filter, PAM30)  
Other BLAST [web gateways](#)

All matches to this query

| Score | Mr(calc)  | Delta   | Sequence                        |
|-------|-----------|---------|---------------------------------|
| 20.2  | 1562.8708 | 0.0051  | <a href="#">LFADKVPKTAENF</a>   |
| 19.6  | 1562.8549 | 0.0211  | <a href="#">QGMLDDKGRVIED</a>   |
| 18.7  | 1562.7952 | 0.0807  | <a href="#">EPGANLDQPVTMIF</a>  |
| 18.5  | 1562.8273 | 0.0487  | <a href="#">AMDAKVGSLRRVM</a>   |
| 17.2  | 1563.0657 | -0.1897 | <a href="#">SPAGPSHKGKKAVN</a>  |
| 17.0  | 1562.7183 | 0.1577  | <a href="#">LLAAFSVDCCLAYM</a>  |
| 16.4  | 1562.7861 | 0.0898  | <a href="#">EKKAELTQTNM</a>     |
| 15.7  | 1562.9355 | -0.0595 | <a href="#">LFAGSSLGKRGVNAD</a> |
| 15.4  | 1562.8966 | -0.0207 | <a href="#">LACLLTQYRVSLR</a>   |
| 15.0  | 1562.7974 | 0.0786  | <a href="#">LDDGSNMTELIRK</a>   |

Mascot: <http://www.matrixscience.com/>

Mascot Search Results

Peptide View

MS/MS Fragmentation of **LFADKVPKTAENFRAL**  
Found in **PPIA\_MOUSE** in **SwissProt**, Peptidyl-prolyl cis-trans isomerase A OS=Mus musculus GN=Ppia PE=1 SV=2

Match to Query 7801: 1915.174002 from(639.398610,3+) intensity(25260.8220) scans(6886) rawscans(sn6886) rtinseconds(2655.6959) index(4749)

Title: 4750: Scan 6886 (rt=2655.7) [C:\Users\Administrador\Desktop\AMOSTRAS NO ORBITRAP LEANDRO RODAR NOVAMENTE\CORTEX\cortex\_01.raw]  
Data file cortex\_01.temp.mgf

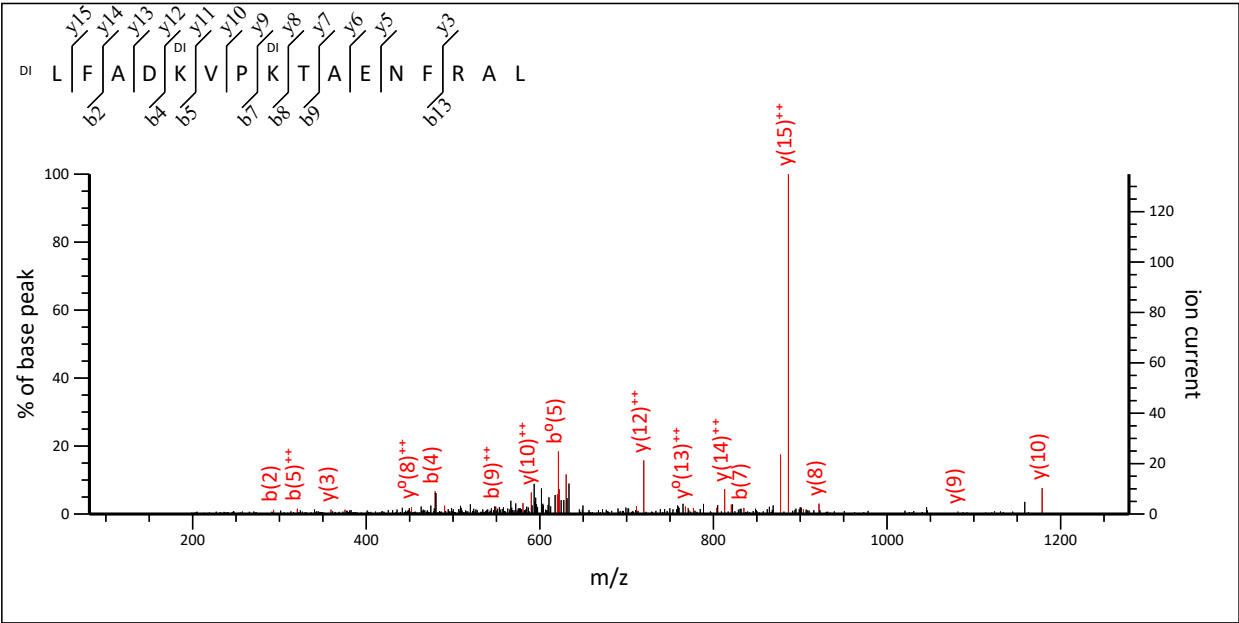

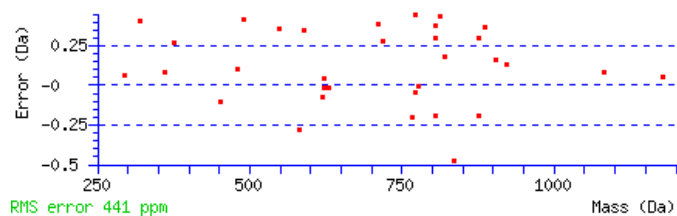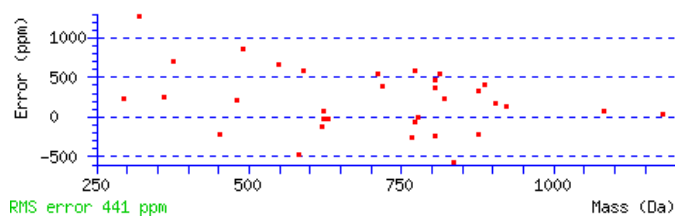

NCBI BLAST search of [LFADKVPKTAENFRAL](#)

(Parameters: blastp, nr protein database, expect=20000, no filter, PAM30)

Other BLAST [web gateways](#)

#### All matches to this query

| Score | Mr(calc)  | Delta  | Sequence                            |
|-------|-----------|--------|-------------------------------------|
| 18.9  | 1915.1684 | 0.0056 | <a href="#">LFADKVPKTAENFRAL</a>    |
| 16.1  | 1915.0903 | 0.0837 | <a href="#">MRGTPVLVALGDFLGGPLA</a> |
| 14.8  | 1915.1146 | 0.0594 | <a href="#">ADAFYKAKNEFAAKAT</a>    |
| 14.1  | 1915.0477 | 0.1263 | <a href="#">AEVLAARGYLTGMAGKW</a>   |
| 13.3  | 1915.0940 | 0.0800 | <a href="#">ADSTEMGDKATAGISKPL</a>  |
| 11.7  | 1914.8892 | 0.2848 | <a href="#">AFGEAALEQTLAEMCEL</a>   |
| 11.4  | 1915.0430 | 0.1310 | <a href="#">AIGYSETAVDPTLPKTF</a>   |
| 11.2  | 1914.9823 | 0.1917 | <a href="#">ATMTSHDLMKFVAPFN</a>    |
| 11.2  | 1915.0470 | 0.1270 | <a href="#">ITECSSLKRSLEQARM</a>    |
| 11.2  | 1914.9547 | 0.2193 | <a href="#">LTCESLEPVVVDLTHND</a>   |

Mascot: <http://www.matrixscience.com/>

# Mascot Search Results

## Peptide View

MS/MS Fragmentation of **FDITADDEPLGRVSF**  
Found in **PPIA\_MOUSE** in **SwissProt**, Peptidyl-prolyl cis-trans isomerase A OS=Mus musculus GN=Ppia PE=1 SV=2

Match to Query 6309: 1712.868048 from(857.441300,2+) intensity(15595.4550) scans(10691) rawscans(sn10691) rtinseconds(4046.8744) index(7877)

Title: 7878: Scan 10691 (rt=4046.87) [C:\Users\Administrador\Desktop\AMOSTRAS NO ORBITRAP LEANDRO RODAR NOVAMENTE\HIPOCAMPO\hipocampo\_02.raw]  
Data file hipocampo\_02.temp.mgf

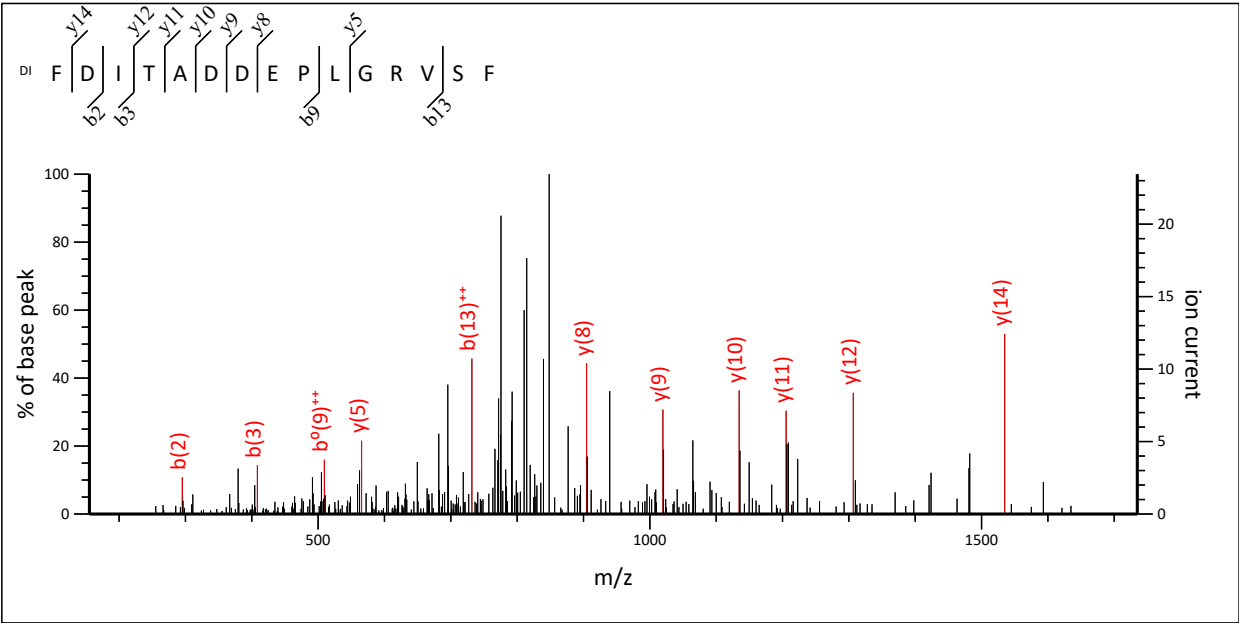



155.27 to 1734.77

Label all possible matches ☐ Label matches used for scoring ☒

Monoisotopic mass of neutral peptide Mr(calc): 1712.8559  
Variable modifications:  
N-term : Dimethyl:2H(4) (N-term)  
Ions Score: 49 Expect: 0.43  
Matches : 12/136 fragment ions using 14 most intense peaks ([help](#))

| #  | b         | b <sup>++</sup> | b <sup>*</sup> | b <sup>+++</sup> | b <sup>0</sup> | b <sup>0++</sup> | Seq. | y         | y <sup>++</sup> | y <sup>*</sup> | y <sup>+++</sup> | y <sup>0</sup> | y <sup>0++</sup> | #  |
|----|-----------|-----------------|----------------|------------------|----------------|------------------|------|-----------|-----------------|----------------|------------------|----------------|------------------|----|
| 1  | 180.1321  | 90.5697         |                |                  |                |                  | F    |           |                 |                |                  |                |                  | 15 |
| 2  | 295.1590  | 148.0832        |                |                  | 277.1485       | 139.0779         | D    | 1534.7384 | 767.8728        | 1517.7118      | 759.3596         | 1516.7278      | 758.8675         | 14 |
| 3  | 408.2431  | 204.6252        |                |                  | 390.2325       | 195.6199         | I    | 1419.7114 | 710.3594        | 1402.6849      | 701.8461         | 1401.7009      | 701.3541         | 13 |
| 4  | 509.2908  | 255.1490        |                |                  | 491.2802       | 246.1437         | T    | 1306.6274 | 653.8173        | 1289.6008      | 645.3040         | 1288.6168      | 644.8120         | 12 |
| 5  | 580.3279  | 290.6676        |                |                  | 562.3173       | 281.6623         | A    | 1205.5797 | 603.2935        | 1188.5531      | 594.7802         | 1187.5691      | 594.2882         | 11 |
| 6  | 695.3548  | 348.1811        |                |                  | 677.3443       | 339.1758         | D    | 1134.5426 | 567.7749        | 1117.5160      | 559.2617         | 1116.5320      | 558.7696         | 10 |
| 7  | 810.3818  | 405.6945        |                |                  | 792.3712       | 396.6892         | D    | 1019.5156 | 510.2615        | 1002.4891      | 501.7482         | 1001.5051      | 501.2562         | 9  |
| 8  | 939.4244  | 470.2158        |                |                  | 921.4138       | 461.2105         | E    | 904.4887  | 452.7480        | 887.4621       | 444.2347         | 886.4781       | 443.7427         | 8  |
| 9  | 1036.4771 | 518.7422        |                |                  | 1018.4666      | 509.7369         | P    | 775.4461  | 388.2267        | 758.4196       | 379.7134         | 757.4355       | 379.2214         | 7  |
| 10 | 1149.5612 | 575.2842        |                |                  | 1131.5506      | 566.2790         | L    | 678.3933  | 339.7003        | 661.3668       | 331.1870         | 660.3828       | 330.6950         | 6  |
| 11 | 1206.5827 | 603.7950        |                |                  | 1188.5721      | 594.7897         | G    | 565.3093  | 283.1583        | 548.2827       | 274.6450         | 547.2987       | 274.1530         | 5  |
| 12 | 1362.6838 | 681.8455        | 1345.6572      | 673.3323         | 1344.6732      | 672.8402         | R    | 508.2878  | 254.6475        | 491.2613       | 246.1343         | 490.2772       | 245.6423         | 4  |
| 13 | 1461.7522 | 731.3797        | 1444.7256      | 722.8665         | 1443.7416      | 722.3745         | V    | 352.1867  | 176.5970        |                |                  | 334.1761       | 167.5917         | 3  |
| 14 | 1548.7842 | 774.8957        | 1531.7577      | 766.3825         | 1530.7737      | 765.8905         | S    | 253.1183  | 127.0628        |                |                  | 235.1077       | 118.0575         | 2  |
| 15 |           |                 |                |                  |                |                  | F    | 166.0863  | 83.5468         |                |                  |                |                  | 1  |

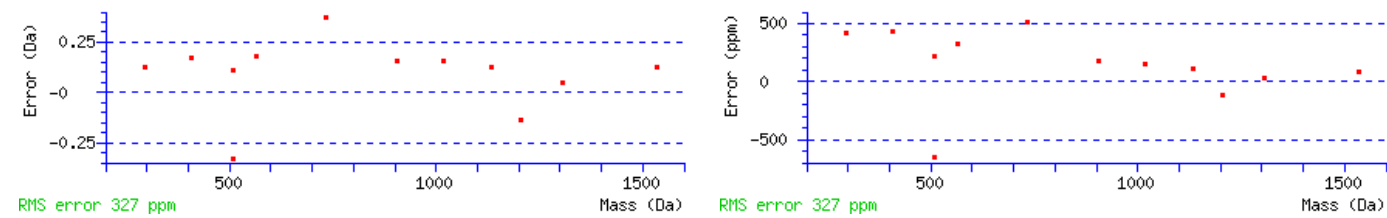

NCBI **BLAST** search of [FDITADDEPLGRVSE](#)  
(Parameters: blastp, nr protein database, expect=20000, no filter, PAM30)  
Other BLAST [web gateways](#)

All matches to this query

| Score | Mr(calc)  | Delta   | Sequence                          |
|-------|-----------|---------|-----------------------------------|
| 48.7  | 1712.8559 | 0.0121  | <a href="#">FDITADDEPLGRVSE</a>   |
| 25.4  | 1712.8052 | 0.0629  | <a href="#">SLLWCAGVDSVTTNAC</a>  |
| 22.4  | 1712.9083 | -0.0403 | <a href="#">TDLFEKGNADFTI</a>     |
| 21.1  | 1712.8791 | -0.0111 | <a href="#">MDITCYFLNKCGLL</a>    |
| 20.6  | 1712.9473 | -0.0793 | <a href="#">SEDSSDDEPLIKKL</a>    |
| 20.3  | 1712.8737 | -0.0057 | <a href="#">TELSWHSCRQLLY</a>     |
| 19.8  | 1712.9382 | -0.0701 | <a href="#">PDSREFGCAKTLI</a>     |
| 17.8  | 1712.8255 | 0.0426  | <a href="#">ASGGLSMAVEGPEGMER</a> |
| 17.6  | 1713.0400 | -0.1719 | <a href="#">FSHTAGVGLIVSQKTP</a>  |
| 16.9  | 1712.8365 | 0.0316  | <a href="#">SLFEAKGDVMATLEM</a>   |

Mascot: <http://www.matrixscience.com/>



# Mascot Search Results

## Peptide View

MS/MS Fragmentation of **VFDVELLKLE**  
Found in **FKB1A\_MOUSE** in **SwissProt**, Peptidyl-prolyl cis-trans isomerase FKBP1A OS=Mus musculus GN=Fkbp1a PE=1 SV=2

Match to Query 3517: 1259.744208 from(630.879380,2+) intensity(13627.6700) scans(11298) rawscans(sn11298) rtinseconds(4220.8133) index(8373)

Title: 8374: Scan 11298 (rt=4220.81) [C:\Users\Administrador\Desktop\AMOSTRAS NO ORBITRAP LEANDRO RODAR NOVAMENTE\HIPOCAMPO\hipocampo\_01.raw]  
Data file hipocampo\_01.temp.mgf

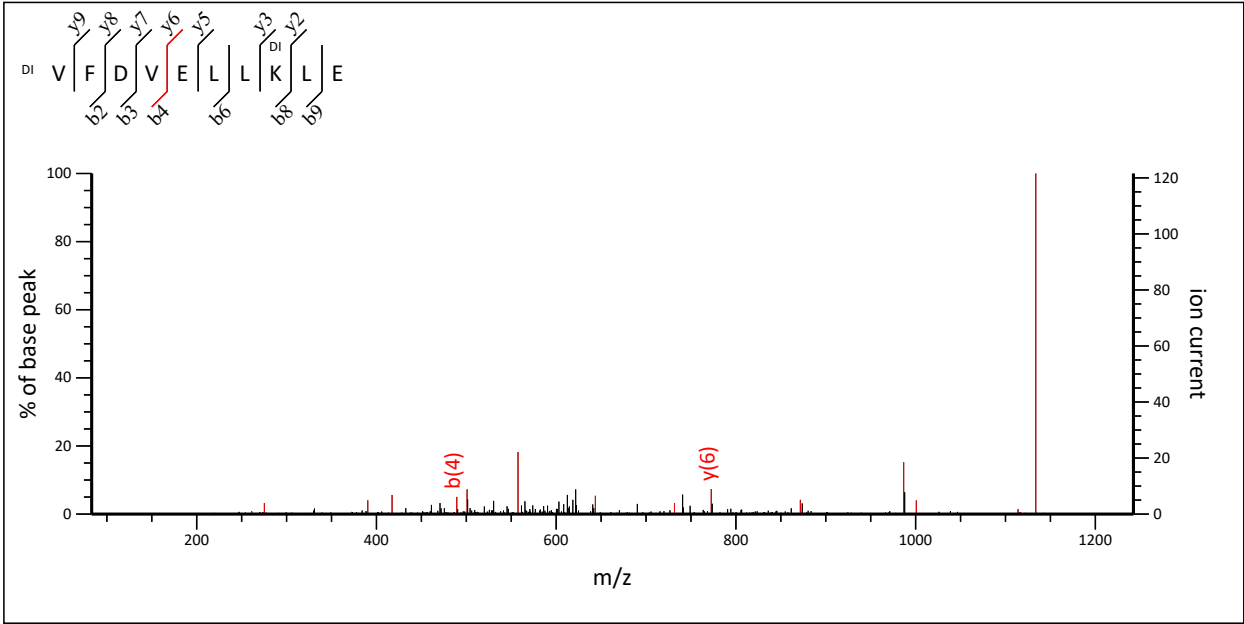

Navigation icons: ? (help), zoom in, zoom out, pan, and a range selector from 83.11 to 1242.39.

Label all possible matches ☐ Label matches used for scoring ☒

Monoisotopic mass of neutral peptide Mr(calc): 1259.7377  
Variable modifications:  
N-term : Dimethyl (N-term)  
K8 : Dimethyl (K)  
Ions Score: 53 Expect: 0.16  
Matches : 17/86 fragment ions using 30 most intense peaks ([help](#))

| #  | b         | b <sup>++</sup> | b <sup>*</sup> | b <sup>+++</sup> | b <sup>0</sup> | b <sup>0++</sup> | Seq. | y         | y <sup>++</sup> | y <sup>*</sup> | y <sup>+++</sup> | y <sup>0</sup> | y <sup>0++</sup> | #  |
|----|-----------|-----------------|----------------|------------------|----------------|------------------|------|-----------|-----------------|----------------|------------------|----------------|------------------|----|
| 1  | 128.1070  | 64.5571         |                |                  |                |                  | V    |           |                 |                |                  |                |                  | 10 |
| 2  | 275.1754  | 138.0913        |                |                  |                |                  | F    | 1133.6453 | 567.3263        | 1116.6187      | 558.8130         | 1115.6347      | 558.3210         | 9  |
| 3  | 390.2023  | 195.6048        |                |                  | 372.1918       | 186.5995         | D    | 986.5768  | 493.7921        | 969.5503       | 485.2788         | 968.5663       | 484.7868         | 8  |
| 4  | 489.2708  | 245.1390        |                |                  | 471.2602       | 236.1337         | V    | 871.5499  | 436.2786        | 854.5233       | 427.7653         | 853.5393       | 427.2733         | 7  |
| 5  | 618.3134  | 309.6603        |                |                  | 600.3028       | 300.6550         | E    | 772.4815  | 386.7444        | 755.4549       | 378.2311         | 754.4709       | 377.7391         | 6  |
| 6  | 731.3974  | 366.2023        |                |                  | 713.3869       | 357.1971         | L    | 643.4389  | 322.2231        | 626.4123       | 313.7098         | 625.4283       | 313.2178         | 5  |
| 7  | 844.4815  | 422.7444        |                |                  | 826.4709       | 413.7391         | L    | 530.3548  | 265.6811        | 513.3283       | 257.1678         | 512.3443       | 256.6758         | 4  |
| 8  | 1000.6077 | 500.8075        | 983.5812       | 492.2942         | 982.5972       | 491.8022         | K    | 417.2708  | 209.1390        | 400.2442       | 200.6257         | 399.2602       | 200.1337         | 3  |
| 9  | 1113.6918 | 557.3495        | 1096.6653      | 548.8363         | 1095.6812      | 548.3443         | L    | 261.1445  | 131.0759        |                |                  | 243.1339       | 122.0706         | 2  |
| 10 |           |                 |                |                  |                |                  | E    | 148.0604  | 74.5339         |                |                  | 130.0499       | 65.5286          | 1  |

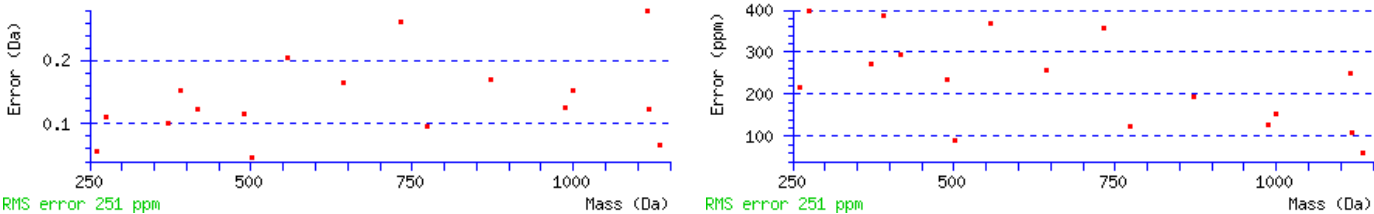

NCBI **BLAST** search of [VFDVELLKLE](#)

(Parameters: blastp, nr protein database, expect=20000, no filter, PAM30)

Other BLAST [web gateways](#)

**All matches to this query**

| Score | Mr(calc)  | Delta  | Sequence                    |
|-------|-----------|--------|-----------------------------|
| 52.5  | 1259.7377 | 0.0065 | <a href="#">VFDVELLKLE</a>  |
| 25.2  | 1259.6319 | 0.1123 | <a href="#">MQTVIEEVLE</a>  |
| 24.5  | 1259.6985 | 0.0457 | <a href="#">LEPLGTPMLIE</a> |
| 24.1  | 1259.6584 | 0.0858 | <a href="#">VFPVQMSPIAQ</a> |
| 23.8  | 1259.5769 | 0.1673 | <a href="#">GEDDATLEVIE</a> |
| 21.9  | 1259.6659 | 0.0783 | <a href="#">ADRENIQVIE</a>  |
| 21.7  | 1259.6790 | 0.0652 | <a href="#">LLPEEAAEPQQ</a> |
| 21.7  | 1259.5704 | 0.1739 | <a href="#">VMDVNDNAPEL</a> |
| 20.9  | 1259.6961 | 0.0481 | <a href="#">IEKAHNNELE</a>  |
| 20.1  | 1259.6192 | 0.1250 | <a href="#">SETCLRMELE</a>  |

Mascot: <http://www.matrixscience.com/>

# Mascot Search Results

## Peptide View

MS/MS Fragmentation of **AGVTVDLGKVLTPQV**  
Found in **PEBP1\_MOUSE** in **SwissProt**, Phosphatidylethanolamine-binding protein 1 OS=Mus musculus GN=Pebp1 PE=1 SV=3

Match to Query 6578: 1790.066948 from(896.040750,2+) intensity(33433.7420) scans(10412) rawscans(sn10412) rtinseconds(3896.0992) index(7621)  
Title: 7622: Scan 10412 (rt=3896.1) [C:\Users\Administrador\Desktop\AMOSTRAS NO ORBITRAP LEANDRO RODAR NOVAMENTE\HIPOCAMPO\hipocampo\_01.raw]  
Data file hipocampo\_01.temp.mgf

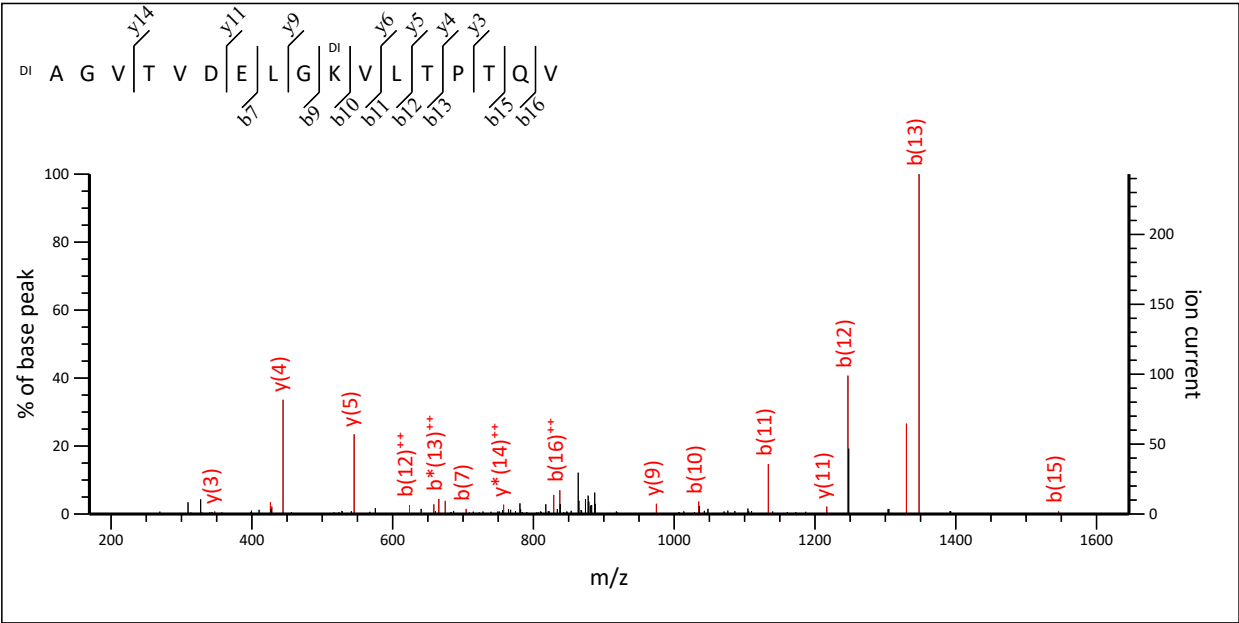

Navigation icons: ? (help), image (download), left arrow, zoom in, zoom out, right arrow, 169.23 to 1646.06 (mass range), image (download), right arrow.

Label all possible matches ☐ Label matches used for scoring ☒

Monoisotopic mass of neutral peptide Mr(calc): 1790.0641  
Variable modifications:  
N-term : Dimethyl:2H(4) (N-term)  
K10 : Dimethyl:2H(4) (K)  
Ions Score: 46 Expect: 0.72  
Matches : 26/162 fragment ions using 36 most intense peaks ([help](#))

| #  | b         | b <sup>++</sup> | b <sup>*</sup> | b <sup>+++</sup> | b <sup>0</sup> | b <sup>0++</sup> | Seq. | y         | y <sup>++</sup> | y <sup>*</sup> | y <sup>+++</sup> | y <sup>0</sup> | y <sup>0++</sup> | #  |
|----|-----------|-----------------|----------------|------------------|----------------|------------------|------|-----------|-----------------|----------------|------------------|----------------|------------------|----|
| 1  | 104.1008  | 52.5540         |                |                  |                |                  | A    |           |                 |                |                  |                |                  | 17 |
| 2  | 161.1223  | 81.0648         |                |                  |                |                  | G    | 1687.9778 | 844.4926        | 1670.9513      | 835.9793         | 1669.9673      | 835.4873         | 16 |
| 3  | 260.1907  | 130.5990        |                |                  |                |                  | V    | 1630.9564 | 815.9818        | 1613.9298      | 807.4686         | 1612.9458      | 806.9765         | 15 |
| 4  | 361.2384  | 181.1228        |                |                  | 343.2278       | 172.1175         | T    | 1531.8880 | 766.4476        | 1514.8614      | 757.9343         | 1513.8774      | 757.4423         | 14 |
| 5  | 460.3068  | 230.6570        |                |                  | 442.2962       | 221.6517         | V    | 1430.8403 | 715.9238        | 1413.8137      | 707.4105         | 1412.8297      | 706.9185         | 13 |
| 6  | 575.3337  | 288.1705        |                |                  | 557.3231       | 279.1652         | D    | 1331.7719 | 666.3896        | 1314.7453      | 657.8763         | 1313.7613      | 657.3843         | 12 |
| 7  | 704.3763  | 352.6918        |                |                  | 686.3657       | 343.6865         | E    | 1216.7449 | 608.8761        | 1199.7184      | 600.3628         | 1198.7344      | 599.8708         | 11 |
| 8  | 817.4604  | 409.2338        |                |                  | 799.4498       | 400.2285         | L    | 1087.7023 | 544.3548        | 1070.6758      | 535.8415         | 1069.6918      | 535.3495         | 10 |
| 9  | 874.4818  | 437.7446        |                |                  | 856.4713       | 428.7393         | G    | 974.6183  | 487.8128        | 957.5917       | 479.2995         | 956.6077       | 478.8075         | 9  |
| 10 | 1034.6332 | 517.8202        | 1017.6067      | 509.3070         | 1016.6226      | 508.8150         | K    | 917.5968  | 459.3020        | 900.5703       | 450.7888         | 899.5862       | 450.2968         | 8  |
| 11 | 1133.7016 | 567.3544        | 1116.6751      | 558.8412         | 1115.6911      | 558.3492         | V    | 757.4454  | 379.2264        | 740.4189       | 370.7131         | 739.4349       | 370.2211         | 7  |
| 12 | 1246.7857 | 623.8965        | 1229.7591      | 615.3832         | 1228.7751      | 614.8912         | L    | 658.3770  | 329.6921        | 641.3505       | 321.1789         | 640.3665       | 320.6869         | 6  |
| 13 | 1347.8334 | 674.4203        | 1330.8068      | 665.9070         | 1329.8228      | 665.4150         | T    | 545.2930  | 273.1501        | 528.2664       | 264.6368         | 527.2824       | 264.1448         | 5  |
| 14 | 1444.8861 | 722.9467        | 1427.8596      | 714.4334         | 1426.8756      | 713.9414         | P    | 444.2453  | 222.6263        | 427.2187       | 214.1130         | 426.2347       | 213.6210         | 4  |
| 15 | 1545.9338 | 773.4705        | 1528.9073      | 764.9573         | 1527.9232      | 764.4653         | T    | 347.1925  | 174.0999        | 330.1660       | 165.5866         | 329.1819       | 165.0946         | 3  |
| 16 | 1673.9924 | 837.4998        | 1656.9658      | 828.9866         | 1655.9818      | 828.4945         | Q    | 246.1448  | 123.5761        | 229.1183       | 115.0628         |                |                  | 2  |
| 17 |           |                 |                |                  |                |                  | V    | 118.0863  | 59.5468         |                |                  |                |                  | 1  |

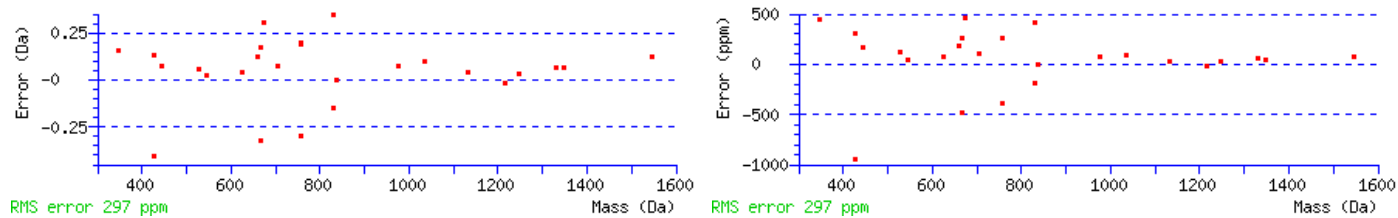

NCBI **BLAST** search of [AGVTVDELGKVLTPQV](#)

(Parameters: blastp, nr protein database, expect=20000, no filter, PAM30)

Other BLAST [web gateways](#)

#### All matches to this query

| Score | Mr(calc)  | Delta  | Sequence                          |
|-------|-----------|--------|-----------------------------------|
| 46.4  | 1790.0641 | 0.0028 | <a href="#">AGVTVDELGKVLTPQV</a>  |
| 31.2  | 1789.8743 | 0.1927 | <a href="#">QLLSMGVFSRVTTYD</a>   |
| 24.4  | 1789.9798 | 0.0872 | <a href="#">ALANTLVALQMGVSVVD</a> |
| 24.3  | 1789.8954 | 0.1716 | <a href="#">NGSLPCMESAVLTAAQI</a> |
| 22.7  | 1789.9911 | 0.0759 | <a href="#">SNQHGIRRNLTAAALGL</a> |
| 20.6  | 1789.7968 | 0.2701 | <a href="#">EPETMETKSVTDYE</a>    |
| 20.6  | 1790.0454 | 0.0215 | <a href="#">LPYTFGGGKLNRIK</a>    |
| 20.6  | 1789.9032 | 0.1637 | <a href="#">MPETITSRDAARFPI</a>   |
| 20.6  | 1789.9761 | 0.0909 | <a href="#">KCNTLFVVDVQTGRI</a>   |
| 20.4  | 1790.0275 | 0.0395 | <a href="#">REGLSRQHVLTIRIV</a>   |

Mascot: <http://www.matrixscience.com/>

## Mascot Search Results

### Peptide View

MS/MS Fragmentation of **DDYVPKLYEOLSGK**

Found in **PEBP1 MOUSE** in **SwissProt**, Phosphatidylethanolamine-binding protein 1 OS=Mus musculus GN=Pebp1 PE=1 SV=3

Match to Query 6409: 1750.006752 from(584.342860,3+) intensity(34890.2810) scans(8909) rawscans(sn8909) rtinseconds(3350.4485) index(6358)

Title: 6359: Scan 8909 (rt=3350.45) [C:\Users\Administrador\Desktop\AMOSTRAS NO ORBITRAP LEANDRO RODAR

NOVAMENTE\HIPOCAMPO\hipocampo 01.raw]

Data file hipocampo\_01.temp.mgf

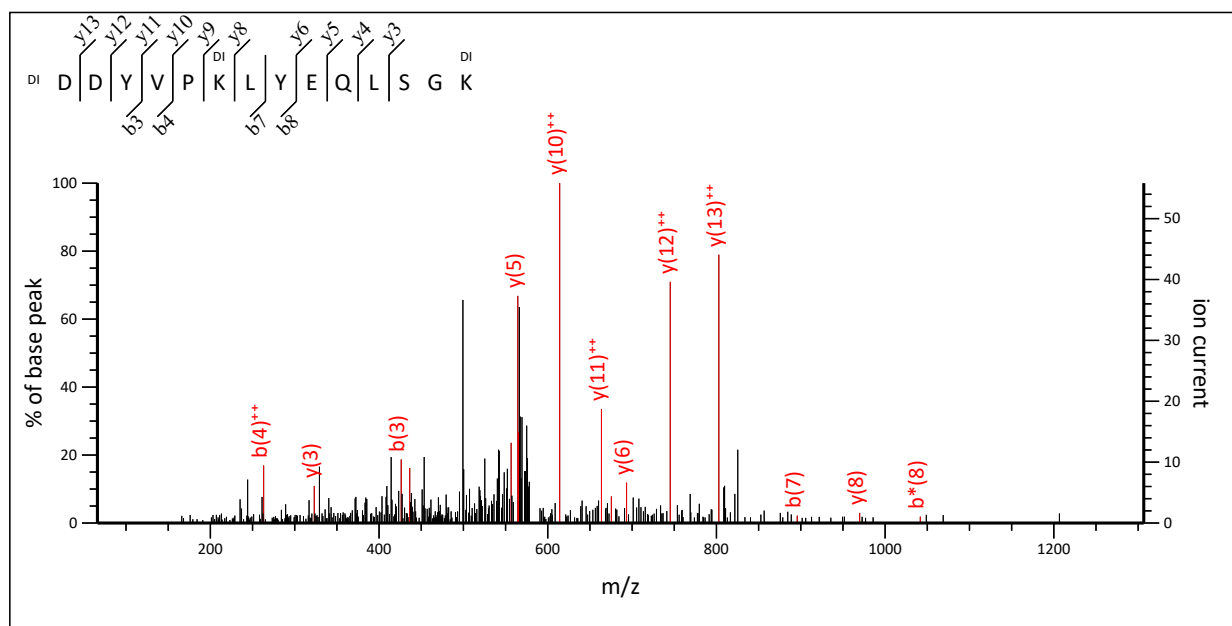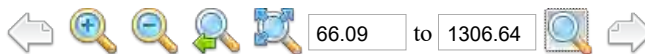

Label all possible matches ☐ Label matches used for scoring ☒

**Monoisotopic mass of neutral peptide Mr(calc): 1749.9942**

Variable modifications:

N-term : Dimethyl:2H(4) (N-term)

K6 : Dimethyl:2H(4) (K)

```

K14      : Dimethyl:2H(4) (K)

```

**Ions Score: 28    Expect: 45**

**Matches :** 18/142 fragment ions using 38 most intense peaks ([help](#))

| #  | b         | b <sup>++</sup> | b*        | b <sup>*++</sup> | b <sup>0</sup> | b <sup>0++</sup> | Seq. | y         | y <sup>++</sup> | y*        | y <sup>*++</sup> | y <sup>0</sup> | y <sup>0++</sup> | #  |
|----|-----------|-----------------|-----------|------------------|----------------|------------------|------|-----------|-----------------|-----------|------------------|----------------|------------------|----|
| 1  | 148.0906  | 74.5490         |           |                  | 130.0801       | 65.5437          | D    |           |                 |           |                  |                |                  | 14 |
| 2  | 263.1176  | 132.0624        |           |                  | 245.1070       | 123.0571         | D    | 1603.9182 | 802.4627        | 1586.8916 | 793.9494         | 1585.9076      | 793.4574         | 13 |
| 3  | 426.1809  | 213.5941        |           |                  | 408.1703       | 204.5888         | Y    | 1488.8912 | 744.9492        | 1471.8647 | 736.4360         | 1470.8806      | 735.9440         | 12 |
| 4  | 525.2493  | 263.1283        |           |                  | 507.2387       | 254.1230         | V    | 1325.8279 | 663.4176        | 1308.8013 | 654.9043         | 1307.8173      | 654.4123         | 11 |
| 5  | 622.3021  | 311.6547        |           |                  | 604.2915       | 302.6494         | P    | 1226.7595 | 613.8834        | 1209.7329 | 605.3701         | 1208.7489      | 604.8781         | 10 |
| 6  | 782.4534  | 391.7304        | 765.4269  | 383.2171         | 764.4429       | 382.7251         | K    | 1129.7067 | 565.3570        | 1112.6802 | 556.8437         | 1111.6961      | 556.3517         | 9  |
| 7  | 895.5375  | 448.2724        | 878.5110  | 439.7591         | 877.5269       | 439.2671         | L    | 969.5553  | 485.2813        | 952.5288  | 476.7680         | 951.5448       | 476.2760         | 8  |
| 8  | 1058.6008 | 529.8041        | 1041.5743 | 521.2908         | 1040.5903      | 520.7988         | Y    | 856.4713  | 428.7393        | 839.4447  | 420.2260         | 838.4607       | 419.7340         | 7  |
| 9  | 1187.6434 | 594.3254        | 1170.6169 | 585.8121         | 1169.6329      | 585.3201         | E    | 693.4079  | 347.2076        | 676.3814  | 338.6943         | 675.3974       | 338.2023         | 6  |
| 10 | 1315.7020 | 658.3546        | 1298.6755 | 649.8414         | 1297.6914      | 649.3494         | Q    | 564.3653  | 282.6863        | 547.3388  | 274.1730         | 546.3548       | 273.6810         | 5  |
| 11 | 1428.7861 | 714.8967        | 1411.7595 | 706.3834         | 1410.7755      | 705.8914         | L    | 436.3068  | 218.6570        | 419.2802  | 210.1437         | 418.2962       | 209.6517         | 4  |
| 12 | 1515.8181 | 758.4127        | 1498.7916 | 749.8994         | 1497.8075      | 749.4074         | S    | 323.2227  | 162.1150        | 306.1962  | 153.6017         | 305.2121       | 153.1097         | 3  |
| 13 | 1572.8396 | 786.9234        | 1555.8130 | 778.4101         | 1554.8290      | 777.9181         | G    | 236.1907  | 118.5990        | 219.1641  | 110.0857         |                |                  | 2  |
| 14 |           |                 |           |                  |                |                  | K    | 179.1692  | 90.0882         | 162.1427  | 81.5750          |                |                  | 1  |

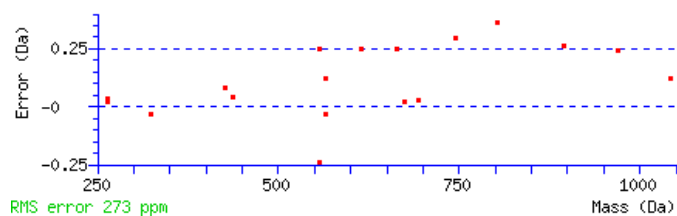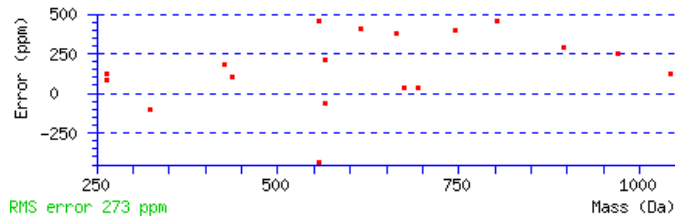

NCBI **BLAST** search of [DDYVPKLYEQLSGK](#)

(Parameters: blastp, nr protein database, expect=20000, no filter, PAM30)

Other BLAST [web gateways](#)

#### All matches to this query

| Score | Mr(calc)  | Delta   | Sequence                          |
|-------|-----------|---------|-----------------------------------|
| 28.5  | 1749.9942 | 0.0125  | <a href="#">DDYVPKLYEQLSGK</a>    |
| 22.5  | 1749.8537 | 0.1531  | <a href="#">MLAKSAMPYVMMNE</a>    |
| 17.6  | 1749.9440 | 0.0627  | <a href="#">VVLSPYELKVYYED</a>    |
| 15.1  | 1749.9988 | 0.0079  | <a href="#">PRKAVPGNSFTYVNE</a>   |
| 14.9  | 1749.7377 | 0.2691  | <a href="#">HPSSSVSSSPSQMDHH</a>  |
| 14.4  | 1749.9245 | 0.0823  | <a href="#">KSTTVQVPMMHQL</a>     |
| 14.1  | 1749.7433 | 0.2635  | <a href="#">DDGAVFLAACSSGDTDE</a> |
| 13.3  | 1750.0866 | -0.0799 | <a href="#">FLKAGTVCRKEKNE</a>    |
| 13.2  | 1749.6323 | 0.3745  | <a href="#">MSGMMMSHMSQASMQ</a>   |
| 13.2  | 1750.0792 | -0.0725 | <a href="#">AAHLGKKARGKEADE</a>   |

Mascot: <http://www.matrixscience.com/>

# Mascot Search Results

## Peptide View

MS/MS Fragmentation of **DGLDPGKLYTL**  
Found in **PEBP1\_MOUSE** in **SwissProt**, Phosphatidylethanolamine-binding protein 1 OS=Mus musculus GN=Pebp1 PE=1 SV=3

Match to Query 3369: 1246.687088 from(624.350820,2+) intensity(21610.6190) scans(9057) rawscans(sn9057) rtinseconds(3452.6934) index(6450)  
Title: 6451: Scan 9057 (rt=3452.69) [C:\Users\Administrador\Desktop\AMOSTRAS NO ORBITRAP LEANDRO RODAR NOVAMENTE\HIPOCAMPO\hipocampo\_02.raw]  
Data file hipocampo\_02.temp.mgf

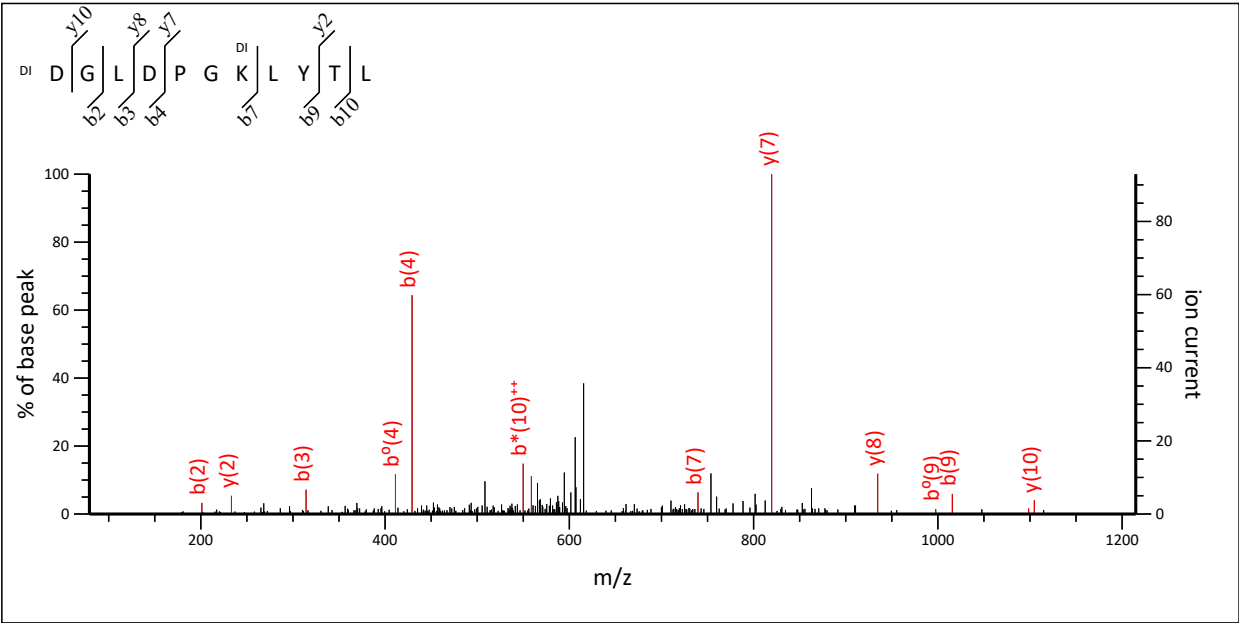

Navigation icons: ? (help), zoom in, zoom out, zoom reset, pan, 79.08 to 1214.8, zoom reset, pan.

Label all possible matches ☐ Label matches used for scoring ☒

Monoisotopic mass of neutral peptide Mr(calc): 1246.6809  
Variable modifications:  
N-term : Dimethyl (N-term)  
K7 : Dimethyl (K)  
Ions Score: 34 Expect: 11  
Matches : 15/98 fragment ions using 20 most intense peaks ([help](#))

| #  | b         | b <sup>++</sup> | b <sup>*</sup> | b <sup>+++</sup> | b <sup>0</sup> | b <sup>0++</sup> | Seq. | y         | y <sup>++</sup> | y <sup>*</sup> | y <sup>+++</sup> | y <sup>0</sup> | y <sup>0++</sup> | #  |
|----|-----------|-----------------|----------------|------------------|----------------|------------------|------|-----------|-----------------|----------------|------------------|----------------|------------------|----|
| 1  | 144.0655  | 72.5364         |                |                  | 126.0550       | 63.5311          | D    |           |                 |                |                  |                |                  | 11 |
| 2  | 201.0870  | 101.0471        |                |                  | 183.0764       | 92.0418          | G    | 1104.6299 | 552.8186        | 1087.6034      | 544.3053         | 1086.6194      | 543.8133         | 10 |
| 3  | 314.1710  | 157.5892        |                |                  | 296.1605       | 148.5839         | L    | 1047.6085 | 524.3079        | 1030.5819      | 515.7946         | 1029.5979      | 515.3026         | 9  |
| 4  | 429.1980  | 215.1026        |                |                  | 411.1874       | 206.0974         | D    | 934.5244  | 467.7658        | 917.4979       | 459.2526         | 916.5138       | 458.7606         | 8  |
| 5  | 526.2508  | 263.6290        |                |                  | 508.2402       | 254.6237         | P    | 819.4975  | 410.2524        | 802.4709       | 401.7391         | 801.4869       | 401.2471         | 7  |
| 6  | 583.2722  | 292.1397        |                |                  | 565.2617       | 283.1345         | G    | 722.4447  | 361.7260        | 705.4182       | 353.2127         | 704.4341       | 352.7207         | 6  |
| 7  | 739.3985  | 370.2029        | 722.3719       | 361.6896         | 721.3879       | 361.1976         | K    | 665.4232  | 333.2153        | 648.3967       | 324.7020         | 647.4127       | 324.2100         | 5  |
| 8  | 852.4825  | 426.7449        | 835.4560       | 418.2316         | 834.4720       | 417.7396         | L    | 509.2970  | 255.1521        |                |                  | 491.2864       | 246.1468         | 4  |
| 9  | 1015.5459 | 508.2766        | 998.5193       | 499.7633         | 997.5353       | 499.2713         | Y    | 396.2129  | 198.6101        |                |                  | 378.2023       | 189.6048         | 3  |
| 10 | 1116.5936 | 558.8004        | 1099.5670      | 550.2871         | 1098.5830      | 549.7951         | T    | 233.1496  | 117.0784        |                |                  | 215.1390       | 108.0731         | 2  |
| 11 |           |                 |                |                  |                |                  | L    | 132.1019  | 66.5546         |                |                  |                |                  | 1  |

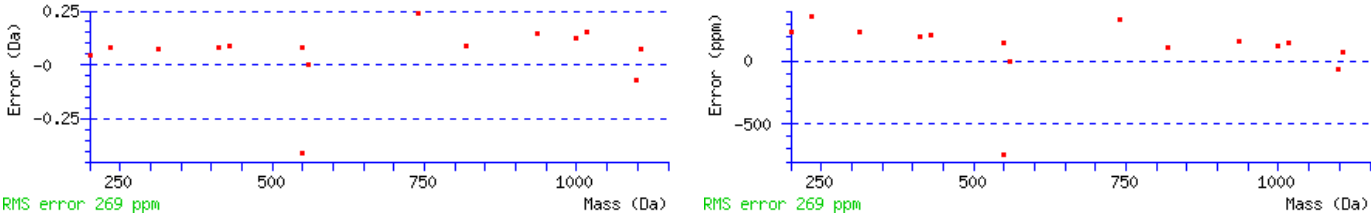

NCBI **BLAST** search of [DGLDPGKLYTL](#)

(Parameters: blastp, nr protein database, expect=20000, no filter, PAM30)

Other BLAST [web gateways](#)

**All matches to this query**

| Score | Mr(calc)  | Delta   | Sequence                      |
|-------|-----------|---------|-------------------------------|
| 34.4  | 1246.6809 | 0.0062  | <a href="#">DGLDPGKLYTL</a>   |
| 28.9  | 1246.7529 | -0.0658 | <a href="#">AKDLRGEMTL</a>    |
| 28.8  | 1246.6670 | 0.0201  | <a href="#">RSDRPAYVTI</a>    |
| 27.1  | 1246.7716 | -0.0845 | <a href="#">VPVMAIRDKM</a>    |
| 25.1  | 1246.7781 | -0.0910 | <a href="#">KIDPSMGTLTI</a>   |
| 23.7  | 1246.7166 | -0.0295 | <a href="#">AKDMGGQLGGLA</a>  |
| 21.8  | 1246.6769 | 0.0102  | <a href="#">ATINTIGTGASTI</a> |
| 21.5  | 1246.6115 | 0.0756  | <a href="#">GDIPVSGMLLS</a>   |
| 19.5  | 1246.6838 | 0.0033  | <a href="#">PVDVADVPEGTL</a>  |
| 19.0  | 1246.5717 | 0.1153  | <a href="#">DQDFPSSAPTL</a>   |

Mascot: <http://www.matrixscience.com/>



# Mascot Search Results

## Peptide View

MS/MS Fragmentation of **GLDPGKLYTL**  
Found in **PEBP1\_MOUSE** in **SwissProt**, Phosphatidylethanolamine-binding protein 1 OS=Mus musculus GN=Pebp1 PE=1 SV=3

Match to Query 2711: 1131.658828 from(566.836690,2+) intensity(49904.5080) scans(8571) rawscans(sn8571) rtinseconds(3230.7918) index(6097)

Title: 6098: Scan 8571 (rt=3230.79) [C:\Users\Administrador\Desktop\AMOSTRAS NO ORBITRAP LEANDRO RODAR NOVAMENTE\HIPOCAMPO\hipocampo\_01.raw]  
Data file hipocampo\_01.temp.mgf

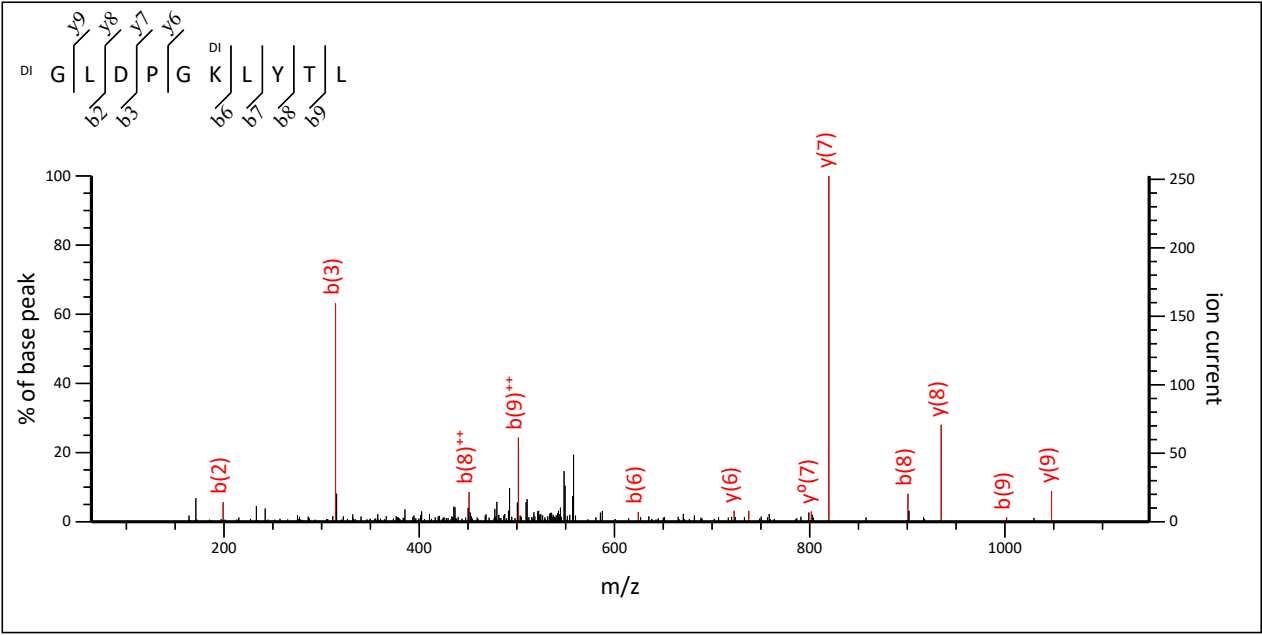

Navigation icons: ? (help), [back] (previous view), [zoom in] (magnifying glass), [zoom out] (magnifying glass), [reset] (circular arrow), [range] (input fields), [zoom in] (magnifying glass), [next] (arrow). Range: 64.16 to 1147.76.

Label all possible matches ☐ Label matches used for scoring ☒

Monoisotopic mass of neutral peptide Mr(calc): 1131.6540  
Variable modifications:  
N-term : Dimethyl (N-term)  
K6 : Dimethyl (K)  
Ions Score: 52 Expect: 0.18  
Matches : 14/84 fragment ions using 18 most intense peaks ([help](#))

| #  | b         | b <sup>++</sup> | b <sup>*</sup> | b <sup>+++</sup> | b <sup>0</sup> | b <sup>0++</sup> | Seq. | y         | y <sup>++</sup> | y <sup>*</sup> | y <sup>+++</sup> | y <sup>0</sup> | y <sup>0++</sup> | #  |
|----|-----------|-----------------|----------------|------------------|----------------|------------------|------|-----------|-----------------|----------------|------------------|----------------|------------------|----|
| 1  | 86.0600   | 43.5337         |                |                  |                |                  | G    |           |                 |                |                  |                |                  | 10 |
| 2  | 199.1441  | 100.0757        |                |                  |                |                  | L    | 1047.6085 | 524.3079        | 1030.5819      | 515.7946         | 1029.5979      | 515.3026         | 9  |
| 3  | 314.1710  | 157.5892        |                |                  | 296.1605       | 148.5839         | D    | 934.5244  | 467.7658        | 917.4979       | 459.2526         | 916.5138       | 458.7606         | 8  |
| 4  | 411.2238  | 206.1155        |                |                  | 393.2132       | 197.1103         | P    | 819.4975  | 410.2524        | 802.4709       | 401.7391         | 801.4869       | 401.2471         | 7  |
| 5  | 468.2453  | 234.6263        |                |                  | 450.2347       | 225.6210         | G    | 722.4447  | 361.7260        | 705.4182       | 353.2127         | 704.4341       | 352.7207         | 6  |
| 6  | 624.3715  | 312.6894        | 607.3450       | 304.1761         | 606.3610       | 303.6841         | K    | 665.4232  | 333.2153        | 648.3967       | 324.7020         | 647.4127       | 324.2100         | 5  |
| 7  | 737.4556  | 369.2314        | 720.4291       | 360.7182         | 719.4450       | 360.2262         | L    | 509.2970  | 255.1521        |                |                  | 491.2864       | 246.1468         | 4  |
| 8  | 900.5189  | 450.7631        | 883.4924       | 442.2498         | 882.5084       | 441.7578         | Y    | 396.2129  | 198.6101        |                |                  | 378.2023       | 189.6048         | 3  |
| 9  | 1001.5666 | 501.2869        | 984.5401       | 492.7737         | 983.5560       | 492.2817         | T    | 233.1496  | 117.0784        |                |                  | 215.1390       | 108.0731         | 2  |
| 10 |           |                 |                |                  |                |                  | L    | 132.1019  | 66.5546         |                |                  |                |                  | 1  |

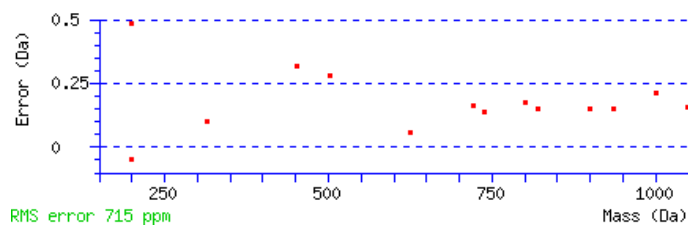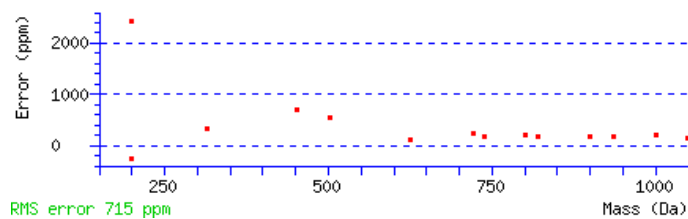

NCBI **BLAST** search of [GLDPGKLYTL](#)

(Parameters: blastp, nr protein database, expect=20000, no filter, PAM30)

Other BLAST [web gateways](#)

#### All matches to this query

| Score | Mr(calc)  | Delta   | Sequence                    |
|-------|-----------|---------|-----------------------------|
| 52.2  | 1131.6540 | 0.0049  | <a href="#">GLDPGKLYTL</a>  |
| 33.0  | 1131.4794 | 0.1794  | <a href="#">QDYMFETL</a>    |
| 29.4  | 1131.5448 | 0.1140  | <a href="#">QDFPSSAPTL</a>  |
| 24.9  | 1131.5772 | 0.0816  | <a href="#">ERVGDGVTTI</a>  |
| 24.9  | 1131.6135 | 0.0453  | <a href="#">GLDRSLETLT</a>  |
| 24.4  | 1131.5875 | 0.0714  | <a href="#">SMVSSGSSVTL</a> |
| 23.6  | 1131.6023 | 0.0565  | <a href="#">EKVQEETTL</a>   |
| 23.3  | 1131.5295 | 0.1293  | <a href="#">QDSEGDVLSL</a>  |
| 21.9  | 1131.7355 | -0.0766 | <a href="#">ALPSPIEKTI</a>  |
| 21.8  | 1131.5560 | 0.1028  | <a href="#">GIPDDRDGLF</a>  |

Mascot: <http://www.matrixscience.com/>

# Mascot Search Results

## Peptide View

MS/MS Fragmentation of **GVTVDLGKVLTPQV**  
Found in **PEBP1\_MOUSE** in **SwissProt**, Phosphatidylethanolamine-binding protein 1 OS=Mus musculus GN=Pebp1 PE=1 SV=3  
Match to Query 6673: 1710.997988 from(856.506270,2+) intensity(52410.6160) scans(10133-10239) rawscans(sn10133:sn10239)  
rtinseconds(3813.7829-3851.1647) index(7485)  
Title: 7486: Sum of 2 scans in range 10133 (rt=3813.78) to 10239 (rt=3851.16) [C:\Users\Administrador\Desktop\AMOSTRAS NO ORBITRAP LEANDRO RODAR NOVAMENTE\CORTEX\cortex\_01.raw]  
Data file cortex\_01.temp.mgf

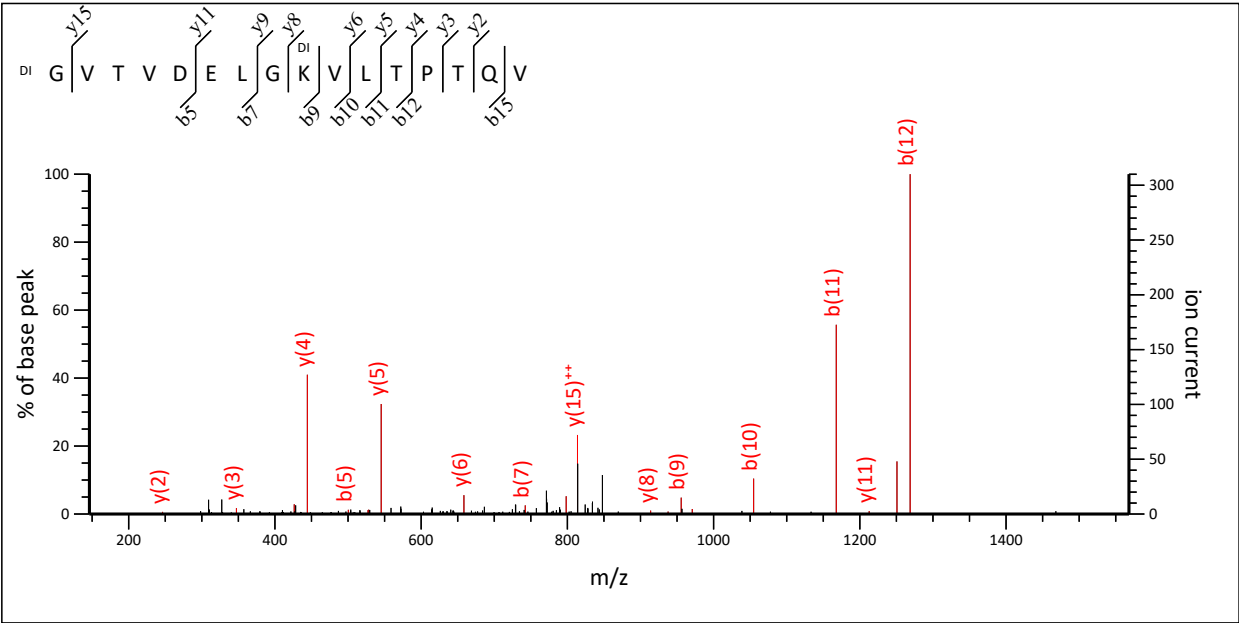



146.29 to 1568.09



Label all possible matches ☐ Label matches used for scoring ☒

Monoisotopic mass of neutral peptide Mr(calc): 1710.9768  
Variable modifications:  
N-term : Dimethyl (N-term)  
K9 : Dimethyl (K)  
Ions Score: 34 Expect: 13  
Matches : 21/154 fragment ions using 46 most intense peaks ([help](#))

| #  | b         | b <sup>++</sup> | b <sup>*</sup> | b <sup>+++</sup> | b <sup>0</sup> | b <sup>0++</sup> | Seq. | y         | y <sup>++</sup> | y <sup>*</sup> | y <sup>+++</sup> | y <sup>0</sup> | y <sup>0++</sup> | #  |
|----|-----------|-----------------|----------------|------------------|----------------|------------------|------|-----------|-----------------|----------------|------------------|----------------|------------------|----|
| 1  | 86.0600   | 43.5337         |                |                  |                |                  | G    |           |                 |                |                  |                |                  | 16 |
| 2  | 185.1285  | 93.0679         |                |                  |                |                  | V    | 1626.9313 | 813.9693        | 1609.9047      | 805.4560         | 1608.9207      | 804.9640         | 15 |
| 3  | 286.1761  | 143.5917        |                |                  | 268.1656       | 134.5864         | T    | 1527.8629 | 764.4351        | 1510.8363      | 755.9218         | 1509.8523      | 755.4298         | 14 |
| 4  | 385.2445  | 193.1259        |                |                  | 367.2340       | 184.1206         | V    | 1426.8152 | 713.9112        | 1409.7886      | 705.3980         | 1408.8046      | 704.9059         | 13 |
| 5  | 500.2715  | 250.6394        |                |                  | 482.2609       | 241.6341         | D    | 1327.7468 | 664.3770        | 1310.7202      | 655.8637         | 1309.7362      | 655.3717         | 12 |
| 6  | 629.3141  | 315.1607        |                |                  | 611.3035       | 306.1554         | E    | 1212.7198 | 606.8635        | 1195.6933      | 598.3503         | 1194.7093      | 597.8583         | 11 |
| 7  | 742.3981  | 371.7027        |                |                  | 724.3876       | 362.6974         | L    | 1083.6772 | 542.3423        | 1066.6507      | 533.8290         | 1065.6667      | 533.3370         | 10 |
| 8  | 799.4196  | 400.2134        |                |                  | 781.4090       | 391.2082         | G    | 970.5932  | 485.8002        | 953.5666       | 477.2869         | 952.5826       | 476.7949         | 9  |
| 9  | 955.5459  | 478.2766        | 938.5193       | 469.7633         | 937.5353       | 469.2713         | K    | 913.5717  | 457.2895        | 896.5451       | 448.7762         | 895.5611       | 448.2842         | 8  |
| 10 | 1054.6143 | 527.8108        | 1037.5877      | 519.2975         | 1036.6037      | 518.8055         | V    | 757.4454  | 379.2264        | 740.4189       | 370.7131         | 739.4349       | 370.2211         | 7  |
| 11 | 1167.6984 | 584.3528        | 1150.6718      | 575.8395         | 1149.6878      | 575.3475         | L    | 658.3770  | 329.6921        | 641.3505       | 321.1789         | 640.3665       | 320.6869         | 6  |
| 12 | 1268.7460 | 634.8767        | 1251.7195      | 626.3634         | 1250.7355      | 625.8714         | T    | 545.2930  | 273.1501        | 528.2664       | 264.6368         | 527.2824       | 264.1448         | 5  |
| 13 | 1365.7988 | 683.4030        | 1348.7722      | 674.8898         | 1347.7882      | 674.3978         | P    | 444.2453  | 222.6263        | 427.2187       | 214.1130         | 426.2347       | 213.6210         | 4  |
| 14 | 1466.8465 | 733.9269        | 1449.8199      | 725.4136         | 1448.8359      | 724.9216         | T    | 347.1925  | 174.0999        | 330.1660       | 165.5866         | 329.1819       | 165.0946         | 3  |
| 15 | 1594.9051 | 797.9562        | 1577.8785      | 789.4429         | 1576.8945      | 788.9509         | Q    | 246.1448  | 123.5761        | 229.1183       | 115.0628         |                |                  | 2  |
| 16 |           |                 |                |                  |                |                  | V    | 118.0863  | 59.5468         |                |                  |                |                  | 1  |

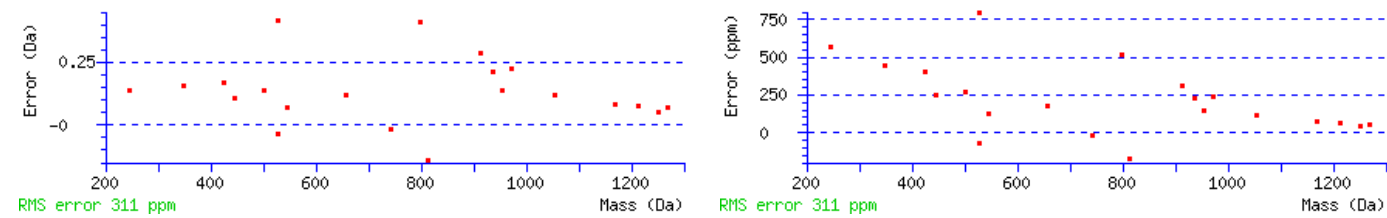

NCBI BLAST search of [GVTVDELGKVLTPQTQV](#)  
(Parameters: blastp, nr protein database, expect=20000, no filter, PAM30)  
Other BLAST [web gateways](#)

All matches to this query

| Score | Mr(calc)  | Delta   | Sequence                           |
|-------|-----------|---------|------------------------------------|
| 33.9  | 1710.9768 | 0.0212  | <a href="#">GVTVDELGKVLTPQTQV</a>  |
| 29.5  | 1710.8788 | 0.1192  | <a href="#">SAQSSPQQAVLTIPSQ</a>   |
| 23.7  | 1710.9264 | 0.0716  | <a href="#">QLSSTLKRYTESSR</a>     |
| 22.0  | 1710.8611 | 0.1369  | <a href="#">LLGCENELGPITPGRD</a>   |
| 22.0  | 1711.0402 | -0.0422 | <a href="#">MRYHKAHLTRRL</a>       |
| 21.8  | 1710.7957 | 0.2023  | <a href="#">QLMQYDQCLTKGPD</a>     |
| 21.8  | 1711.0433 | -0.0454 | <a href="#">QLGLVDSLVLPLGILGSV</a> |
| 21.1  | 1710.9930 | 0.0050  | <a href="#">GLGLATLVSETNRVLH</a>   |
| 21.1  | 1710.8976 | 0.1003  | <a href="#">ILMTLVLFPPDMLG</a>     |
| 21.1  | 1711.0535 | -0.0556 | <a href="#">LIFTIVVDILGNLLV</a>    |

Mascot: <http://www.matrixscience.com/>

11/11/2019

MS/MS Fragmentation of **KGNDISSGTVL**

Found in **PEBP1 MOUSE** in **SwissProt**, Phosphatidylethanolamine-binding protein 1 OS=Mus musculus GN=Pebp1 PE=1 SV=3

Title: 2986: Scan 6352 (rt=2247.29) [C:\Users\Administrador\Desktop\AMOSTRAS NO ORBITRAP LEANDRO RODAR  
NOVAMENTE\HIPOCAMPO\hipocampo\_04.raw]  
Data file hipocampo\_04.temp.mgf

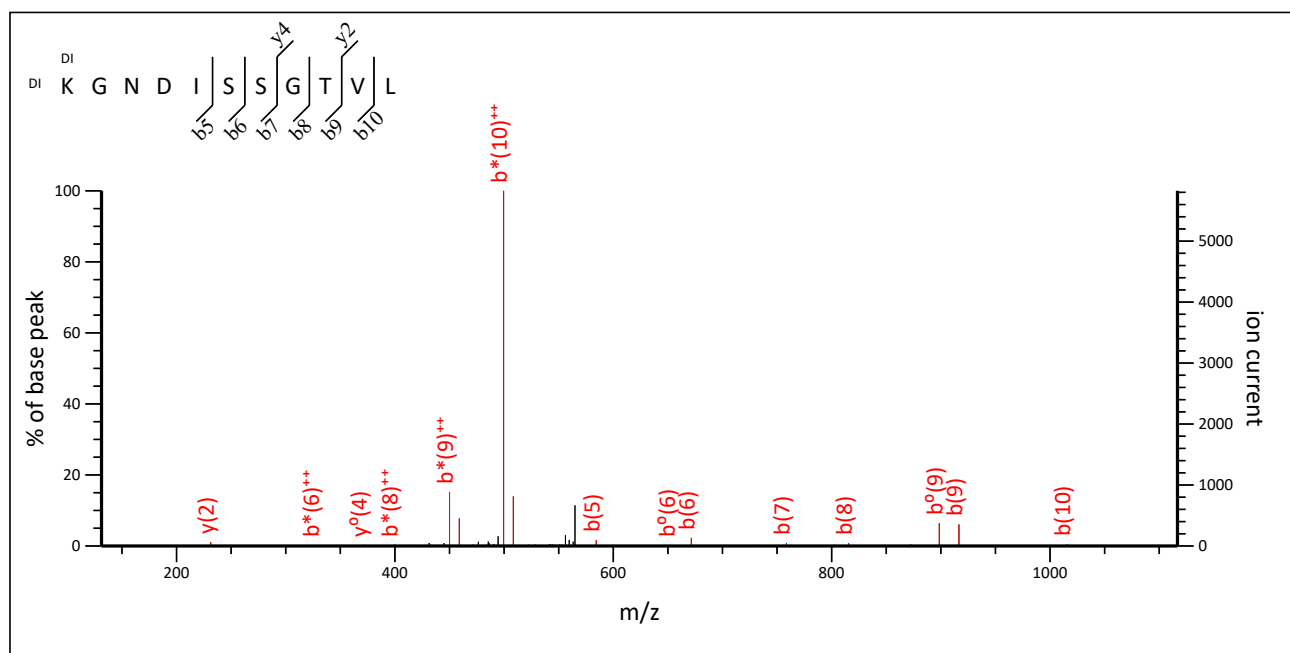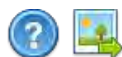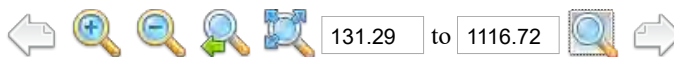

Label all possible matches ☐ Label matches used for scoring ☒

**Monoisotopic mass of neutral peptide Mr(calc): 1145.6292**

Variable modifications:

N-term : Dimethyl (N-term)

K1 : Dimethyl (K)

**Ions Score: 38 Expect: 4.4**

**Matches :** 22/94 fragment ions using 30 most intense peaks ([help](#))

| #  | <b>b</b>  | <b>b<sup>++</sup></b> | <b>b*</b> | <b>b<sup>*++</sup></b> | <b>b<sup>0</sup></b> | <b>b<sup>0++</sup></b> | Seq. | y        | y <sup>++</sup> | y*       | y <sup>*++</sup> | y <sup>0</sup> | y <sup>0++</sup> | #  |
|----|-----------|-----------------------|-----------|------------------------|----------------------|------------------------|------|----------|-----------------|----------|------------------|----------------|------------------|----|
| 1  | 185.1648  | 93.0861               | 168.1383  | 84.5728                |                      |                        | K    |          |                 |          |                  |                |                  | 11 |
| 2  | 242.1863  | 121.5968              | 225.1598  | 113.0835               |                      |                        | G    | 962.4789 | 481.7431        | 945.4524 | 473.2298         | 944.4684       | 472.7378         | 10 |
| 3  | 356.2292  | 178.6183              | 339.2027  | 170.1050               |                      |                        | N    | 905.4575 | 453.2324        | 888.4309 | 444.7191         | 887.4469       | 444.2271         | 9  |
| 4  | 471.2562  | 236.1317              | 454.2296  | 227.6185               | 453.2456             | 227.1264               | D    | 791.4145 | 396.2109        |          |                  | 773.4040       | 387.2056         | 8  |
| 5  | 584.3402  | 292.6738              | 567.3137  | 284.1605               | 566.3297             | 283.6685               | I    | 676.3876 | 338.6974        |          |                  | 658.3770       | 329.6921         | 7  |
| 6  | 671.3723  | 336.1898              | 654.3457  | 327.6765               | 653.3617             | 327.1845               | S    | 563.3035 | 282.1554        |          |                  | 545.2930       | 273.1501         | 6  |
| 7  | 758.4043  | 379.7058              | 741.3777  | 371.1925               | 740.3937             | 370.7005               | S    | 476.2715 | 238.6394        |          |                  | 458.2609       | 229.6341         | 5  |
| 8  | 815.4258  | 408.2165              | 798.3992  | 399.7032               | 797.4152             | 399.2112               | G    | 389.2395 | 195.1234        |          |                  | 371.2289       | 186.1181         | 4  |
| 9  | 916.4734  | 458.7404              | 899.4469  | 450.2271               | 898.4629             | 449.7351               | T    | 332.2180 | 166.6126        |          |                  | 314.2074       | 157.6074         | 3  |
| 10 | 1015.5419 | 508.2746              | 998.5153  | 499.7613               | 997.5313             | 499.2693               | V    | 231.1703 | 116.0888        |          |                  |                |                  | 2  |
| 11 |           |                       |           |                        |                      |                        | L    | 132.1019 | 66.5546         |          |                  |                |                  | 1  |

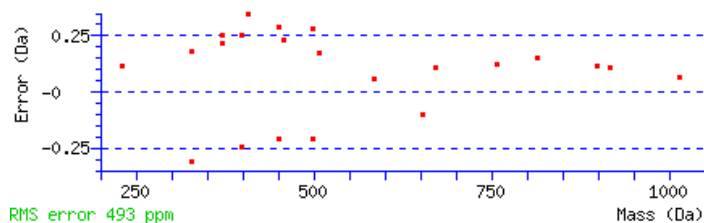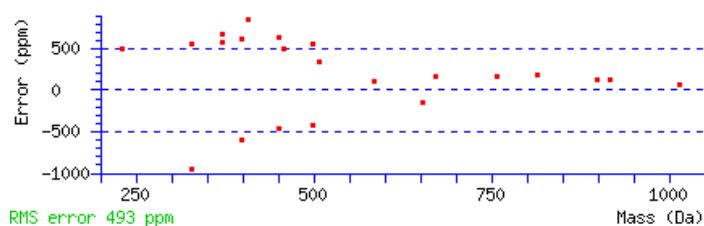

NCBI **BLAST** search of [KGNDISSGTVL](#)

(Parameters: blastp, nr protein database, expect=20000, no filter, PAM30)

Other BLAST [web gateways](#)

#### All matches to this query

| Score | Mr(calc)  | Delta   | Sequence                      |
|-------|-----------|---------|-------------------------------|
| 49.1  | 1145.7383 | -0.0932 | <a href="#">YIHGKSGTVL</a>    |
| 38.3  | 1145.6292 | 0.0159  | <a href="#">KGNDISSGTVL</a>   |
| 36.7  | 1145.5746 | 0.0705  | <a href="#">GVPGSDGQPGTP</a>  |
| 35.8  | 1145.6366 | 0.0085  | <a href="#">DVLLCVSGTVI</a>   |
| 35.7  | 1145.7048 | -0.0597 | <a href="#">RGFYKGTVL</a>     |
| 33.6  | 1145.7008 | -0.0557 | <a href="#">HTQAKQGTVL</a>    |
| 31.7  | 1145.6416 | 0.0035  | <a href="#">VVSAAGGACPAVL</a> |
| 29.4  | 1145.7372 | -0.0921 | <a href="#">NPRGGKVTVL</a>    |
| 28.1  | 1145.5564 | 0.0887  | <a href="#">SGVAALGSSGTD</a>  |
| 27.9  | 1145.6747 | -0.0295 | <a href="#">VPERPSSAVL</a>    |

Mascot: <http://www.matrixscience.com/>

Mascot Search Results

Peptide View

MS/MS Fragmentation of **KGNDISSGTVLSDYVGSGPPSGTGL**  
Found in **PEBP1\_MOUSE** in **SwissProt**, Phosphatidylethanolamine-binding protein 1 OS=Mus musculus GN=Pebp1 PE=1 SV=3

Match to Query 9731: 2420.222848 from(1211.118700,2+) intensity(5879.7676) scans(9689) rawscans(sn9689) rtinseconds(3685.0786) index(6733)  
Title: 6734: Scan 9689 (rt=3685.08) [C:\Users\Administrador\Desktop\AMOSTRAS NO ORBITRAP LEANDRO RODAR  
NOVAMENTE\ESTRIADO\estriado\_01.raw]  
Data file estriado\_01.temp.mgf

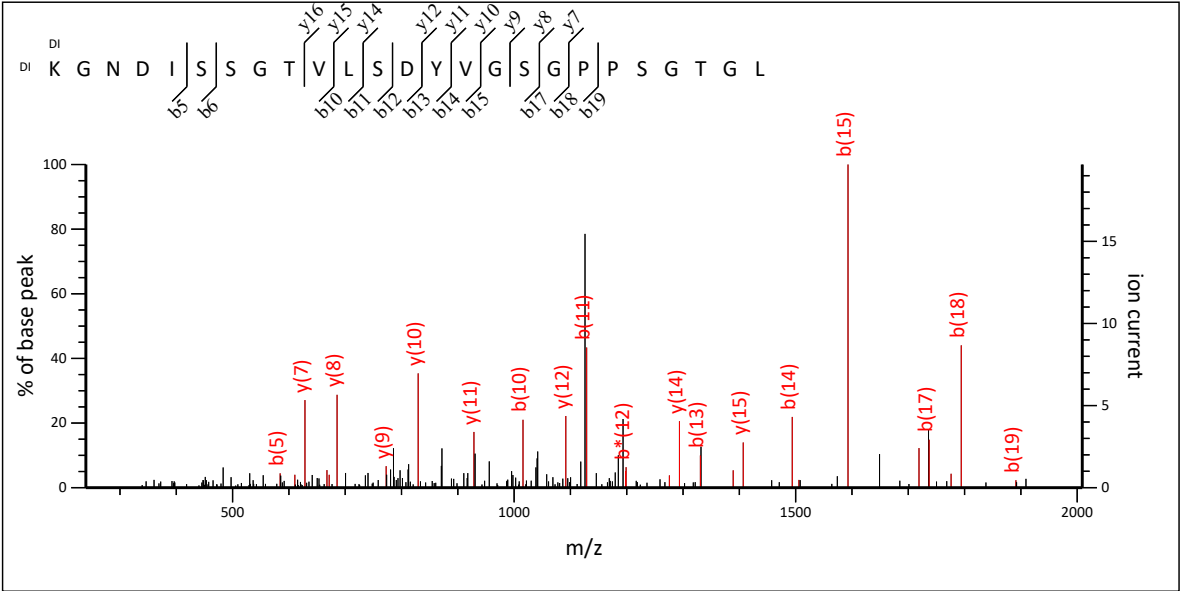

Navigation icons: ? (help), zoom in, zoom out, reset, and a range selector showing 239.42 to 2009.02.

Label all possible matches ☐ Label matches used for scoring ☒

Monoisotopic mass of neutral peptide Mr(calc): 2420.2071  
Variable modifications:  
N-term : Dimethyl (N-term)  
K1 : Dimethyl (K)  
Ions Score: 43 Expect: 0.01  
Matches : 27/234 fragment ions using 60 most intense peaks ([help](#))

| #  | b         | b <sup>++</sup> | b <sup>*</sup> | b <sup>++</sup> * | b <sup>0</sup> | b <sup>0++</sup> | Seq. | y         | y <sup>++</sup> | y <sup>*</sup> | y <sup>++</sup> * | y <sup>0</sup> | y <sup>0++</sup> | #  |
|----|-----------|-----------------|----------------|-------------------|----------------|------------------|------|-----------|-----------------|----------------|-------------------|----------------|------------------|----|
| 1  | 185.1648  | 93.0861         | 168.1383       | 84.5728           |                |                  | K    |           |                 |                |                   |                |                  | 25 |
| 2  | 242.1863  | 121.5968        | 225.1598       | 113.0835          |                |                  | G    | 2237.0568 | 1119.0320       | 2220.0303      | 1110.5188         | 2219.0462      | 1110.0268        | 24 |
| 3  | 356.2292  | 178.6183        | 339.2027       | 170.1050          |                |                  | N    | 2180.0353 | 1090.5213       | 2163.0088      | 1082.0080         | 2162.0248      | 1081.5160        | 23 |
| 4  | 471.2562  | 236.1317        | 454.2296       | 227.6185          | 453.2456       | 227.1264         | D    | 2065.9924 | 1033.4998       |                |                   | 2047.9819      | 1024.4946        | 22 |
| 5  | 584.3402  | 292.6738        | 567.3137       | 284.1605          | 566.3297       | 283.6685         | I    | 1950.9655 | 975.9864        |                |                   | 1932.9549      | 966.9811         | 21 |
| 6  | 671.3723  | 336.1898        | 654.3457       | 327.6765          | 653.3617       | 327.1845         | S    | 1837.8814 | 919.4443        |                |                   | 1819.8709      | 910.4391         | 20 |
| 7  | 758.4043  | 379.7058        | 741.3777       | 371.1925          | 740.3937       | 370.7005         | S    | 1750.8494 | 875.9283        |                |                   | 1732.8388      | 866.9230         | 19 |
| 8  | 815.4258  | 408.2165        | 798.3992       | 399.7032          | 797.4152       | 399.2112         | G    | 1663.8174 | 832.4123        |                |                   | 1645.8068      | 823.4070         | 18 |
| 9  | 916.4734  | 458.7404        | 899.4469       | 450.2271          | 898.4629       | 449.7351         | T    | 1606.7959 | 803.9016        |                |                   | 1588.7853      | 794.8963         | 17 |
| 10 | 1015.5419 | 508.2746        | 998.5153       | 499.7613          | 997.5313       | 499.2693         | V    | 1505.7482 | 753.3777        |                |                   | 1487.7377      | 744.3725         | 16 |
| 11 | 1128.6259 | 564.8166        | 1111.5994      | 556.3033          | 1110.6153      | 555.8113         | L    | 1406.6798 | 703.8435        |                |                   | 1388.6692      | 694.8383         | 15 |
| 12 | 1215.6579 | 608.3326        | 1198.6314      | 599.8193          | 1197.6474      | 599.3273         | S    | 1293.5957 | 647.3015        |                |                   | 1275.5852      | 638.2962         | 14 |
| 13 | 1330.6849 | 665.8461        | 1313.6583      | 657.3328          | 1312.6743      | 656.8408         | D    | 1206.5637 | 603.7855        |                |                   | 1188.5531      | 594.7802         | 13 |
| 14 | 1493.7482 | 747.3777        | 1476.7217      | 738.8645          | 1475.7376      | 738.3725         | Y    | 1091.5368 | 546.2720        |                |                   | 1073.5262      | 537.2667         | 12 |
| 15 | 1592.8166 | 796.9120        | 1575.7901      | 788.3987          | 1574.8061      | 787.9067         | V    | 928.4734  | 464.7404        |                |                   | 910.4629       | 455.7351         | 11 |
| 16 | 1649.8381 | 825.4227        | 1632.8115      | 816.9094          | 1631.8275      | 816.4174         | G    | 829.4050  | 415.2061        |                |                   | 811.3945       | 406.2009         | 10 |
| 17 | 1736.8701 | 868.9387        | 1719.8436      | 860.4254          | 1718.8596      | 859.9334         | S    | 772.3836  | 386.6954        |                |                   | 754.3730       | 377.6901         | 9  |
| 18 | 1793.8916 | 897.4494        | 1776.8650      | 888.9362          | 1775.8810      | 888.4441         | G    | 685.3515  | 343.1794        |                |                   | 667.3410       | 334.1741         | 8  |
| 19 | 1890.9443 | 945.9758        | 1873.9178      | 937.4625          | 1872.9338      | 936.9705         | P    | 628.3301  | 314.6687        |                |                   | 610.3195       | 305.6634         | 7  |
| 20 | 1987.9971 | 994.5022        | 1970.9706      | 985.9889          | 1969.9865      | 985.4969         | P    | 531.2773  | 266.1423        |                |                   | 513.2667       | 257.1370         | 6  |
| 21 | 2075.0291 | 1038.0182       | 2058.0026      | 1029.5049         | 2057.0186      | 1029.0129        | S    | 434.2245  | 217.6159        |                |                   | 416.2140       | 208.6106         | 5  |
| 22 | 2132.0506 | 1066.5289       | 2115.0241      | 1058.0157         | 2114.0400      | 1057.5237        | G    | 347.1925  | 174.0999        |                |                   | 329.1819       | 165.0946         | 4  |

|    |           |           |           |           |           |           |   |          |          |  |  |          |          |   |
|----|-----------|-----------|-----------|-----------|-----------|-----------|---|----------|----------|--|--|----------|----------|---|
| 23 | 2233.0983 | 1117.0528 | 2216.0717 | 1108.5395 | 2215.0877 | 1108.0475 | T | 290.1710 | 145.5892 |  |  | 272.1605 | 136.5839 | 3 |
| 24 | 2290.1197 | 1145.5635 | 2273.0932 | 1137.0502 | 2272.1092 | 1136.5582 | G | 189.1234 | 95.0653  |  |  |          |          | 2 |
| 25 |           |           |           |           |           |           | L | 132.1019 | 66.5546  |  |  |          |          | 1 |

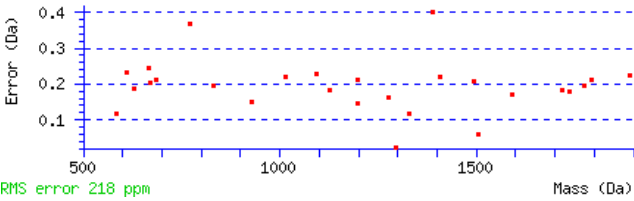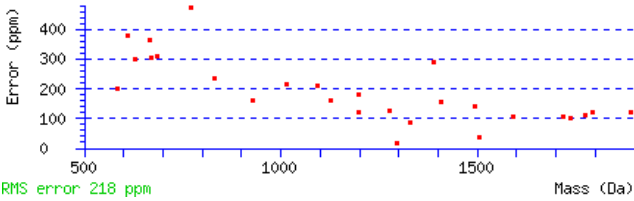

NCBI BLAST search of [KGNDISSGTVLSDYVGSGPPSGTGL](#)  
(Parameters: blastp, nr protein database, expect=20000, no filter, PAM30)  
Other BLAST [web gateways](#)

All matches to this query

| Score | Mr(calc)  | Delta   | Sequence                                  |
|-------|-----------|---------|-------------------------------------------|
| 43.3  | 2420.2071 | 0.0157  | <a href="#">KGNDISSGTVLSDYVGSGPPSGTGL</a> |
| 21.4  | 2420.0914 | 0.1314  | <a href="#">GTAMPPDDVTSLLHLGSGHDNDGA</a>  |
| 20.5  | 2420.4215 | -0.1987 | <a href="#">SVFLLCPWVIVLSVTTESKVE</a>     |
| 18.8  | 2420.3422 | -0.1194 | <a href="#">KSLVGASGGVYALMGGYFMNVIV</a>   |
| 17.3  | 2420.0910 | 0.1319  | <a href="#">CDTTHSNVSCLEMDVPIDLSK</a>     |
| 16.8  | 2420.2760 | -0.0532 | <a href="#">LLSLSTSGVLSIWDIDIITAMS</a>    |
| 16.2  | 2420.2226 | 0.0003  | <a href="#">QGGLVHGGSVGGLAQTNFEREGGSA</a> |
| 16.0  | 2420.2329 | -0.0101 | <a href="#">RLANSTASVSRGSMQELDTLAGL</a>   |
| 15.9  | 2420.1642 | 0.0587  | <a href="#">KAMSSEESSNGSLSVFEFRHLQ</a>    |
| 15.7  | 2420.1244 | 0.0985  | <a href="#">AFPCGSDHTPSPMVSCVPLEATP</a>   |

Mascot: <http://www.matrixscience.com/>



Mascot Search Results

Peptide View

MS/MS Fragmentation of **KGNDISSGTVLSDYVGSPPSGTGLHRY**  
Found in **PEBP1\_MOUSE** in **SwissProt**, Phosphatidylethanolamine-binding protein 1 OS=Mus musculus GN=Pebp1 PE=1 SV=3

Match to Query 9997: 2876.458362 from(959.826730,3+) intensity(24883.7520) scans(7534) rawscans(sn7534) rtinseconds(2864.5721) index(5263)  
Title: 5264: Scan 7534 (rt=2864.57) [C:\Users\Administrador\Desktop\AMOSTRAS NO ORBITRAP LEANDRO RODAR  
NOVAMENTE\HIPOCAMPO\hipocampo\_01.raw]  
Data file hipocampo\_01.temp.mgf

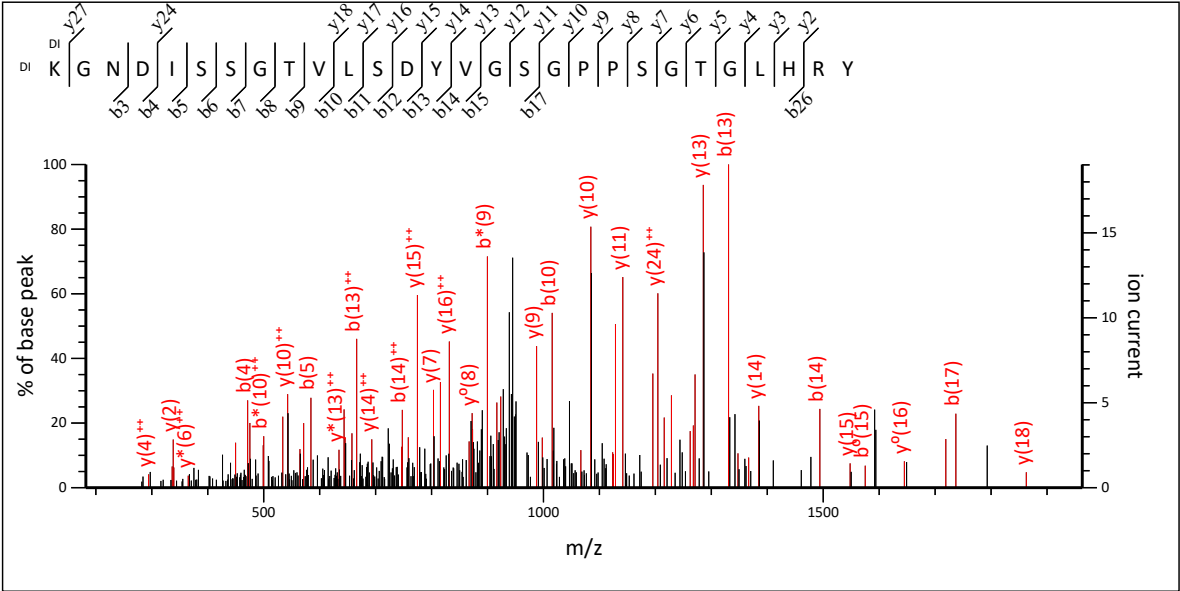

Navigation icons: ? (help), zoom in, zoom out, reset, and a range selector showing 182.18 to 1962.96.

Label all possible matches ☐ Label matches used for scoring ☒

Monoisotopic mass of neutral peptide Mr(calc): 2876.4305  
Variable modifications:  
N-term : Dimethyl (N-term)  
K1 : Dimethyl (K)  
Ions Score: 81 Expect: 0.0003  
Matches : 69/306 fragment ions using 105 most intense peaks ([help](#))

| #  | b         | b <sup>++</sup> | b <sup>*</sup> | b <sup>*++</sup> | b <sup>0</sup> | b <sup>0++</sup> | Seq. | y         | y <sup>++</sup> | y <sup>*</sup> | y <sup>*++</sup> | y <sup>0</sup> | y <sup>0++</sup> | #  |
|----|-----------|-----------------|----------------|------------------|----------------|------------------|------|-----------|-----------------|----------------|------------------|----------------|------------------|----|
| 1  | 185.1648  | 93.0861         | 168.1383       | 84.5728          |                |                  | K    |           |                 |                |                  |                |                  | 28 |
| 2  | 242.1863  | 121.5968        | 225.1598       | 113.0835         |                |                  | G    | 2693.2802 | 1347.1437       | 2676.2536      | 1338.6304        | 2675.2696      | 1338.1384        | 27 |
| 3  | 356.2292  | 178.6183        | 339.2027       | 170.1050         |                |                  | N    | 2636.2587 | 1318.6330       | 2619.2322      | 1310.1197        | 2618.2481      | 1309.6277        | 26 |
| 4  | 471.2562  | 236.1317        | 454.2296       | 227.6185         | 453.2456       | 227.1264         | D    | 2522.2158 | 1261.6115       | 2505.1892      | 1253.0983        | 2504.2052      | 1252.6062        | 25 |
| 5  | 584.3402  | 292.6738        | 567.3137       | 284.1605         | 566.3297       | 283.6685         | I    | 2407.1888 | 1204.0981       | 2390.1623      | 1195.5848        | 2389.1783      | 1195.0928        | 24 |
| 6  | 671.3723  | 336.1898        | 654.3457       | 327.6765         | 653.3617       | 327.1845         | S    | 2294.1048 | 1147.5560       | 2277.0782      | 1139.0427        | 2276.0942      | 1138.5507        | 23 |
| 7  | 758.4043  | 379.7058        | 741.3777       | 371.1925         | 740.3937       | 370.7005         | S    | 2207.0727 | 1104.0400       | 2190.0462      | 1095.5267        | 2189.0622      | 1095.0347        | 22 |
| 8  | 815.4258  | 408.2165        | 798.3992       | 399.7032         | 797.4152       | 399.2112         | G    | 2120.0407 | 1060.5240       | 2103.0142      | 1052.0107        | 2102.0301      | 1051.5187        | 21 |
| 9  | 916.4734  | 458.7404        | 899.4469       | 450.2271         | 898.4629       | 449.7351         | T    | 2063.0192 | 1032.0133       | 2045.9927      | 1023.5000        | 2045.0087      | 1023.0080        | 20 |
| 10 | 1015.5419 | 508.2746        | 998.5153       | 499.7613         | 997.5313       | 499.2693         | V    | 1961.9716 | 981.4894        | 1944.9450      | 972.9761         | 1943.9610      | 972.4841         | 19 |
| 11 | 1128.6259 | 564.8166        | 1111.5994      | 556.3033         | 1110.6153      | 555.8113         | L    | 1862.9032 | 931.9552        | 1845.8766      | 923.4419         | 1844.8926      | 922.9499         | 18 |
| 12 | 1215.6579 | 608.3326        | 1198.6314      | 599.8193         | 1197.6474      | 599.3273         | S    | 1749.8191 | 875.4132        | 1732.7925      | 866.8999         | 1731.8085      | 866.4079         | 17 |
| 13 | 1330.6849 | 665.8461        | 1313.6583      | 657.3328         | 1312.6743      | 656.8408         | D    | 1662.7871 | 831.8972        | 1645.7605      | 823.3839         | 1644.7765      | 822.8919         | 16 |
| 14 | 1493.7482 | 747.3777        | 1476.7217      | 738.8645         | 1475.7376      | 738.3725         | Y    | 1547.7601 | 774.3837        | 1530.7336      | 765.8704         | 1529.7496      | 765.3784         | 15 |
| 15 | 1592.8166 | 796.9120        | 1575.7901      | 788.3987         | 1574.8061      | 787.9067         | V    | 1384.6968 | 692.8520        | 1367.6702      | 684.3388         | 1366.6862      | 683.8468         | 14 |
| 16 | 1649.8381 | 825.4227        | 1632.8115      | 816.9094         | 1631.8275      | 816.4174         | G    | 1285.6284 | 643.3178        | 1268.6018      | 634.8046         | 1267.6178      | 634.3125         | 13 |
| 17 | 1736.8701 | 868.9387        | 1719.8436      | 860.4254         | 1718.8596      | 859.9334         | S    | 1228.6069 | 614.8071        | 1211.5804      | 606.2938         | 1210.5963      | 605.8018         | 12 |
| 18 | 1793.8916 | 897.4494        | 1776.8650      | 888.9362         | 1775.8810      | 888.4441         | G    | 1141.5749 | 571.2911        | 1124.5483      | 562.7778         | 1123.5643      | 562.2858         | 11 |
| 19 | 1890.9443 | 945.9758        | 1873.9178      | 937.4625         | 1872.9338      | 936.9705         | P    | 1084.5534 | 542.7803        | 1067.5269      | 534.2671         | 1066.5429      | 533.7751         | 10 |
| 20 | 1987.9971 | 994.5022        | 1970.9706      | 985.9889         | 1969.9865      | 985.4969         | P    | 987.5007  | 494.2540        | 970.4741       | 485.7407         | 969.4901       | 485.2487         | 9  |
| 21 | 2075.0291 | 1038.0182       | 2058.0026      | 1029.5049        | 2057.0186      | 1029.0129        | S    | 890.4479  | 445.7276        | 873.4213       | 437.2143         | 872.4373       | 436.7223         | 8  |
| 22 | 2132.0506 | 1066.5289       | 2115.0241      | 1058.0157        | 2114.0400      | 1057.5237        | G    | 803.4159  | 402.2116        | 786.3893       | 393.6983         | 785.4053       | 393.2063         | 7  |

|    |           |           |           |           |           |           |   |          |          |          |          |          |          |   |
|----|-----------|-----------|-----------|-----------|-----------|-----------|---|----------|----------|----------|----------|----------|----------|---|
| 23 | 2233.0983 | 1117.0528 | 2216.0717 | 1108.5395 | 2215.0877 | 1108.0475 | T | 746.3944 | 373.7008 | 729.3679 | 365.1876 | 728.3838 | 364.6956 | 6 |
| 24 | 2290.1197 | 1145.5635 | 2273.0932 | 1137.0502 | 2272.1092 | 1136.5582 | G | 645.3467 | 323.1770 | 628.3202 | 314.6637 |          |          | 5 |
| 25 | 2403.2038 | 1202.1055 | 2386.1773 | 1193.5923 | 2385.1932 | 1193.1003 | L | 588.3253 | 294.6663 | 571.2987 | 286.1530 |          |          | 4 |
| 26 | 2540.2627 | 1270.6350 | 2523.2362 | 1262.1217 | 2522.2522 | 1261.6297 | H | 475.2412 | 238.1242 | 458.2146 | 229.6110 |          |          | 3 |
| 27 | 2696.3638 | 1348.6856 | 2679.3373 | 1340.1723 | 2678.3533 | 1339.6803 | R | 338.1823 | 169.5948 | 321.1557 | 161.0815 |          |          | 2 |
| 28 |           |           |           |           |           |           | Y | 182.0812 | 91.5442  |          |          |          |          | 1 |

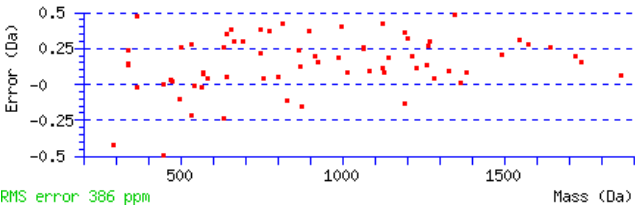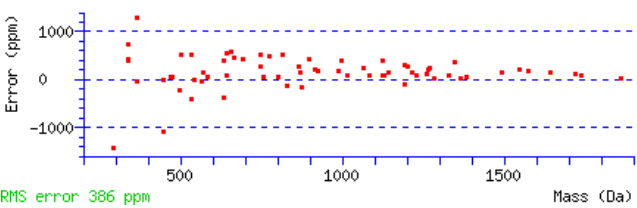

NCBI BLAST search of [KGNDISSGTVLSDYVGSPPSGTGLHRY](#)  
(Parameters: blastp, nr protein database, expect=20000, no filter, PAM30)  
Other BLAST [web gateways](#)

All matches to this query

| Score | Mr(calc)  | Delta   | Sequence                                     |
|-------|-----------|---------|----------------------------------------------|
| 80.8  | 2876.4305 | 0.0279  | <a href="#">KGNDISSGTVLSDYVGSPPSGTGLHRY</a>  |
| 19.8  | 2876.4789 | -0.0205 | <a href="#">VGMLRGVGAGMRYLSDLGYIHRDLAA</a>   |
| 15.0  | 2876.4647 | -0.0063 | <a href="#">RSAQHPSSSDVVTYAPFTLFPSVPVPSA</a> |
| 13.2  | 2876.3441 | 0.1143  | <a href="#">DLQSLCHDLGAVGGCYPEPHKHCHM</a>    |
| 13.2  | 2876.2574 | 0.2009  | <a href="#">GFVMDGQQHMGIRAPGMSGMGMMNMG</a>   |
| 13.2  | 2876.2574 | 0.2009  | <a href="#">GFVMDGQQHMGIRAPGMSGMGMMNMG</a>   |
| 11.5  | 2876.4010 | 0.0574  | <a href="#">DVGYRHVDTAYAYQVEEEIGQAIQS</a>    |
| 11.1  | 2876.6614 | -0.2030 | <a href="#">MLETYSNLVSVGYDIIKPDVIIKL</a>     |
| 11.0  | 2876.4436 | 0.0148  | <a href="#">TFEEKMQACDDLKTTEKLCES</a>        |
| 10.4  | 2876.5607 | -0.1023 | <a href="#">KGRAGESLGRNWYVTPEITITDNDL</a>    |

Mascot: <http://www.matrixscience.com/>

# Mascot Search Results

## Peptide View

MS/MS Fragmentation of **SPQLEDEAKELQ**  
Found in **PENK\_MOUSE** in **SwissProt**, Proenkephalin-A OS=Mus musculus GN=Penk PE=1 SV=2

Match to Query 4648: 1441.734468 from(721.874510,2+) intensity(97246.6800) scans(5703) rawscans(sn5703) rtinseconds(2225.6315) index(3634)

Title: 3635: Scan 5703 (rt=2225.63) [C:\Users\Administrador\Desktop\AMOSTRAS NO ORBITRAP LEANDRO RODAR NOVAMENTE\HIPOCAMPO\hipocampo\_01.raw]  
Data file hipocampo\_01.temp.mgf

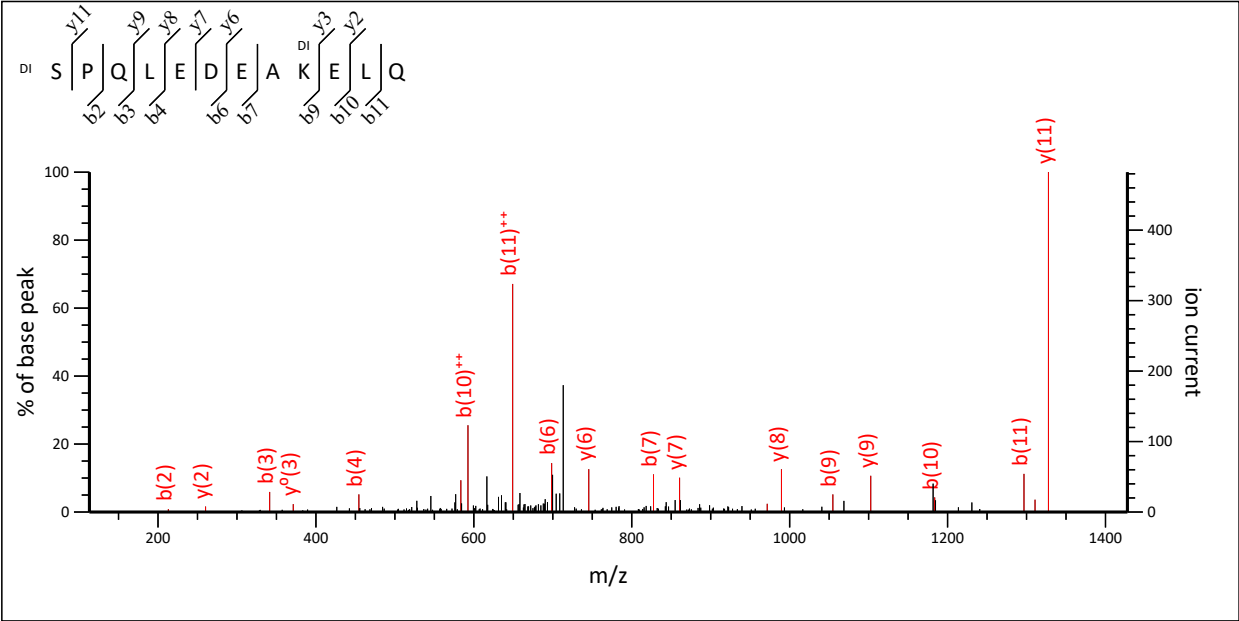



113.14 to 1427.77



Label all possible matches ☐ Label matches used for scoring ☒

Monoisotopic mass of neutral peptide Mr(calc): 1441.7300  
Variable modifications:  
N-term : Dimethyl (N-term)  
K9 : Dimethyl (K)  
Ions Score: 91 Expect: 2.5e-005  
Matches : 23/124 fragment ions using 23 most intense peaks ([help](#))

| #  | b         | b <sup>++</sup> | b <sup>*</sup> | b <sup>++</sup> * | b <sup>0</sup> | b <sup>0++</sup> | Seq. | y         | y <sup>++</sup> | y <sup>*</sup> | y <sup>++</sup> * | y <sup>0</sup> | y <sup>0++</sup> | #  |
|----|-----------|-----------------|----------------|-------------------|----------------|------------------|------|-----------|-----------------|----------------|-------------------|----------------|------------------|----|
| 1  | 116.0706  | 58.5389         |                |                   | 98.0600        | 49.5337          | S    |           |                 |                |                   |                |                  | 12 |
| 2  | 213.1234  | 107.0653        |                |                   | 195.1128       | 98.0600          | P    | 1327.6740 | 664.3406        | 1310.6474      | 655.8274          | 1309.6634      | 655.3353         | 11 |
| 3  | 341.1819  | 171.0946        | 324.1554       | 162.5813          | 323.1714       | 162.0893         | Q    | 1230.6212 | 615.8142        | 1213.5947      | 607.3010          | 1212.6107      | 606.8090         | 10 |
| 4  | 454.2660  | 227.6366        | 437.2395       | 219.1234          | 436.2554       | 218.6314         | L    | 1102.5626 | 551.7850        | 1085.5361      | 543.2717          | 1084.5521      | 542.7797         | 9  |
| 5  | 583.3086  | 292.1579        | 566.2821       | 283.6447          | 565.2980       | 283.1527         | E    | 989.4786  | 495.2429        | 972.4520       | 486.7297          | 971.4680       | 486.2376         | 8  |
| 6  | 698.3355  | 349.6714        | 681.3090       | 341.1581          | 680.3250       | 340.6661         | D    | 860.4360  | 430.7216        | 843.4094       | 422.2084          | 842.4254       | 421.7163         | 7  |
| 7  | 827.3781  | 414.1927        | 810.3516       | 405.6794          | 809.3676       | 405.1874         | E    | 745.4090  | 373.2082        | 728.3825       | 364.6949          | 727.3985       | 364.2029         | 6  |
| 8  | 898.4153  | 449.7113        | 881.3887       | 441.1980          | 880.4047       | 440.7060         | A    | 616.3665  | 308.6869        | 599.3399       | 300.1736          | 598.3559       | 299.6816         | 5  |
| 9  | 1054.5415 | 527.7744        | 1037.5150      | 519.2611          | 1036.5310      | 518.7691         | K    | 545.3293  | 273.1683        | 528.3028       | 264.6550          | 527.3188       | 264.1630         | 4  |
| 10 | 1183.5841 | 592.2957        | 1166.5576      | 583.7824          | 1165.5735      | 583.2904         | E    | 389.2031  | 195.1052        | 372.1765       | 186.5919          | 371.1925       | 186.0999         | 3  |
| 11 | 1296.6682 | 648.8377        | 1279.6416      | 640.3245          | 1278.6576      | 639.8324         | L    | 260.1605  | 130.5839        | 243.1339       | 122.0706          |                |                  | 2  |
| 12 |           |                 |                |                   |                |                  | Q    | 147.0764  | 74.0418         | 130.0499       | 65.5286           |                |                  | 1  |

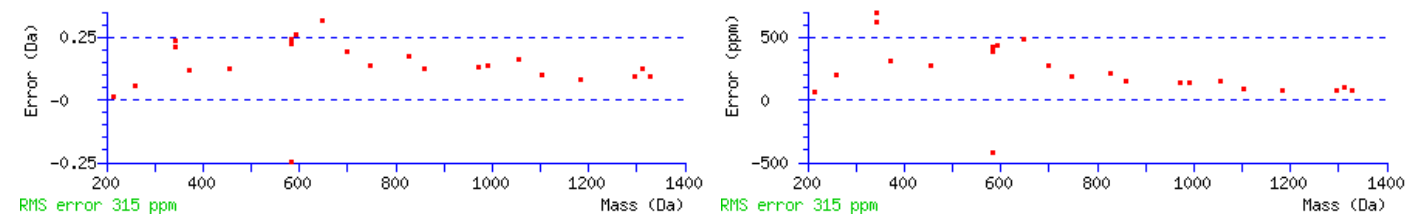

NCBI **BLAST** search of [SPQLEDEAKELQ](#)  
(Parameters: blastp, nr protein database, expect=20000, no filter, PAM30)  
Other BLAST [web gateways](#)

All matches to this query

| Score | Mr(calc)  | Delta   | Sequence                      |
|-------|-----------|---------|-------------------------------|
| 90.9  | 1441.7300 | 0.0045  | <a href="#">SPQLEDEAKELQ</a>  |
| 33.4  | 1441.7966 | -0.0621 | <a href="#">INIPLDEVGEALQ</a> |
| 31.6  | 1441.7201 | 0.0143  | <a href="#">SWSRSIEDLQPP</a>  |
| 27.2  | 1441.7708 | -0.0364 | <a href="#">YVIPFSMGPLGSP</a> |
| 26.2  | 1441.6333 | 0.1012  | <a href="#">YCNENEVGELIQ</a>  |
| 26.0  | 1441.8140 | -0.0795 | <a href="#">KAERDKSLELQ</a>   |
| 26.0  | 1441.8392 | -0.1047 | <a href="#">KLEKLSAAEEIQ</a>  |
| 26.0  | 1441.8252 | -0.0908 | <a href="#">RLKERSVEELQ</a>   |
| 25.8  | 1441.7235 | 0.0110  | <a href="#">NKLGTAMSHEIQ</a>  |
| 25.7  | 1441.6543 | 0.0802  | <a href="#">DYPEFPGSQNNP</a>  |

Mascot: <http://www.matrixscience.com/>

# Mascot Search Results

## Peptide View

MS/MS Fragmentation of **ASAPLVETSTPLRL**  
Found in **PCSK1\_MOUSE** in **SwissProt**, ProSAAS OS=Mus musculus GN=Pcsk1n PE=1 SV=2

Match to Query 5247: 1481.858568 from(741.936560,2+) intensity(17465.0230) scans(9155) rawscans(sn9155) rtinseconds(3469.1442) index(6640)  
Title: 6641: Scan 9155 (rt=3469.14) [C:\Users\Administrador\Desktop\AMOSTRAS NO ORBITRAP LEANDRO RODAR NOVAMENTE\CORTEX\cortex\_01.raw]  
Data file cortex\_01.temp.mgf

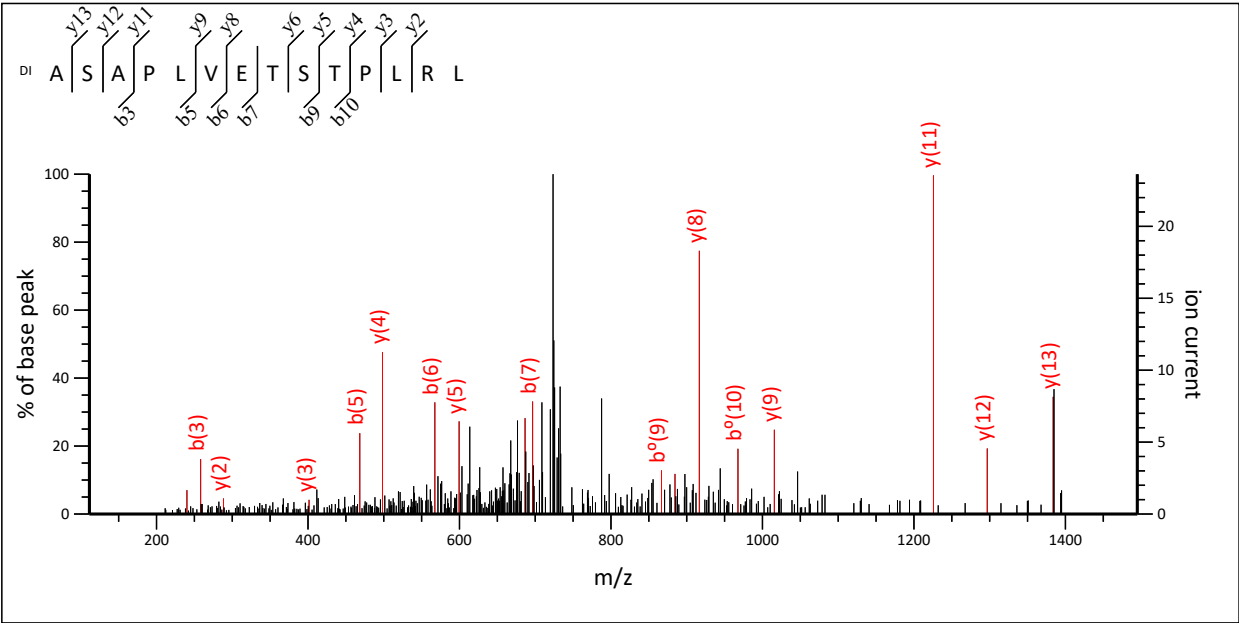

Navigation icons: ? (help), image (download), left arrow, zoom in, zoom out, zoom reset, 111.41 to 1494.92 (mass range), zoom in, right arrow.

Label all possible matches ☐ Label matches used for scoring ☒

Monoisotopic mass of neutral peptide Mr(calc): 1481.8453  
Variable modifications:  
N-term : Dimethyl (N-term)  
Ions Score: 67 Expect: 0.0056  
Matches : 18/120 fragment ions using 36 most intense peaks ([help](#))

| #  | b         | b <sup>++</sup> | b <sup>*</sup> | b <sup>+++</sup> | b <sup>0</sup> | b <sup>0++</sup> | Seq. | y         | y <sup>++</sup> | y <sup>*</sup> | y <sup>+++</sup> | y <sup>0</sup> | y <sup>0++</sup> | #  |
|----|-----------|-----------------|----------------|------------------|----------------|------------------|------|-----------|-----------------|----------------|------------------|----------------|------------------|----|
| 1  | 100.0757  | 50.5415         |                |                  |                |                  | A    |           |                 |                |                  |                |                  | 14 |
| 2  | 187.1077  | 94.0575         |                |                  | 169.0972       | 85.0522          | S    | 1383.7842 | 692.3957        | 1366.7577      | 683.8825         | 1365.7736      | 683.3905         | 13 |
| 3  | 258.1448  | 129.5761        |                |                  | 240.1343       | 120.5708         | A    | 1296.7522 | 648.8797        | 1279.7256      | 640.3665         | 1278.7416      | 639.8744         | 12 |
| 4  | 355.1976  | 178.1024        |                |                  | 337.1870       | 169.0972         | P    | 1225.7151 | 613.3612        | 1208.6885      | 604.8479         | 1207.7045      | 604.3559         | 11 |
| 5  | 468.2817  | 234.6445        |                |                  | 450.2711       | 225.6392         | L    | 1128.6623 | 564.8348        | 1111.6358      | 556.3215         | 1110.6517      | 555.8295         | 10 |
| 6  | 567.3501  | 284.1787        |                |                  | 549.3395       | 275.1734         | V    | 1015.5782 | 508.2928        | 998.5517       | 499.7795         | 997.5677       | 499.2875         | 9  |
| 7  | 696.3927  | 348.7000        |                |                  | 678.3821       | 339.6947         | E    | 916.5098  | 458.7585        | 899.4833       | 450.2453         | 898.4993       | 449.7533         | 8  |
| 8  | 797.4403  | 399.2238        |                |                  | 779.4298       | 390.2185         | T    | 787.4672  | 394.2373        | 770.4407       | 385.7240         | 769.4567       | 385.2320         | 7  |
| 9  | 884.4724  | 442.7398        |                |                  | 866.4618       | 433.7345         | S    | 686.4196  | 343.7134        | 669.3930       | 335.2001         | 668.4090       | 334.7081         | 6  |
| 10 | 985.5201  | 493.2637        |                |                  | 967.5095       | 484.2584         | T    | 599.3875  | 300.1974        | 582.3610       | 291.6841         | 581.3770       | 291.1921         | 5  |
| 11 | 1082.5728 | 541.7900        |                |                  | 1064.5623      | 532.7848         | P    | 498.3398  | 249.6736        | 481.3133       | 241.1603         |                |                  | 4  |
| 12 | 1195.6569 | 598.3321        |                |                  | 1177.6463      | 589.3268         | L    | 401.2871  | 201.1472        | 384.2605       | 192.6339         |                |                  | 3  |
| 13 | 1351.7580 | 676.3826        | 1334.7314      | 667.8694         | 1333.7474      | 667.3774         | R    | 288.2030  | 144.6051        | 271.1765       | 136.0919         |                |                  | 2  |
| 14 |           |                 |                |                  |                |                  | L    | 132.1019  | 66.5546         |                |                  |                |                  | 1  |

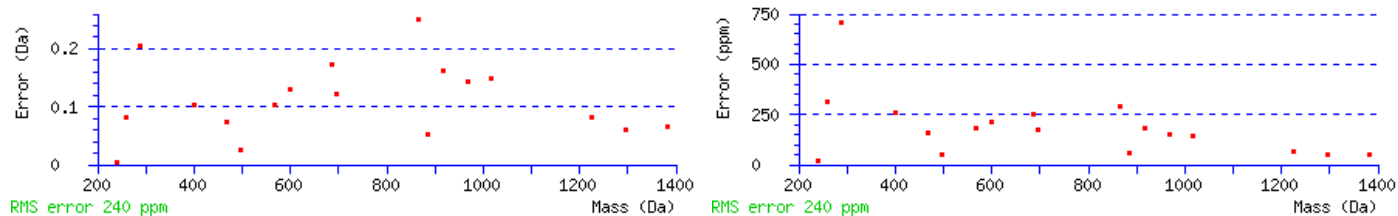

NCBI **BLAST** search of [ASAPLVETSTPLRL](#)

(Parameters: blastp, nr protein database, expect=20000, no filter, PAM30)

Other BLAST [web gateways](#)

#### All matches to this query

| Score | Mr(calc)  | Delta   | Sequence                        |
|-------|-----------|---------|---------------------------------|
| 67.4  | 1481.8453 | 0.0132  | <a href="#">ASAPLVETSTPLRL</a>  |
| 17.4  | 1481.6998 | 0.1588  | <a href="#">AGLPAEESDAQQAPA</a> |
| 16.7  | 1481.6646 | 0.1939  | <a href="#">DGSLGSFTSTSNFM</a>  |
| 16.6  | 1481.8311 | 0.0274  | <a href="#">LPQVTWIVQYSA</a>    |
| 14.8  | 1481.7613 | 0.0972  | <a href="#">QVIEKTSGPEEPA</a>   |
| 14.0  | 1481.9983 | -0.1397 | <a href="#">AVKIMEKVVKII</a>    |
| 12.8  | 1481.6457 | 0.2129  | <a href="#">QPCGSQGTPTSFSSA</a> |
| 12.8  | 1481.8541 | 0.0045  | <a href="#">SKSVTEGLLTQQQ</a>   |
| 12.3  | 1481.8326 | 0.0260  | <a href="#">RACGLLSPLSAHLA</a>  |
| 12.2  | 1481.7660 | 0.0926  | <a href="#">ASAPLMELLHSRN</a>   |

Mascot: <http://www.matrixscience.com/>

Mascot Search Results

Peptide View

MS/MS Fragmentation of **SLSAASAPLVETSTPLRL**  
Found in **PCSK1\_MOUSE** in **SwissProt**, ProSAAS OS=Mus musculus GN=Pcsk1n PE=1 SV=2

Match to Query 6853: 1840.034728 from(921.024640,2+) intensity(51618.4840) scans(10414) rawscans(sn10414) rtinseconds(3896.7859) index(7623)  
Title: 7624: Scan 10414 (rt=3896.79) [C:\Users\Administrador\Desktop\AMOSTRAS NO ORBITRAP LEANDRO RODAR NOVAMENTE\HIPOCAMPO\hipocampo\_01.raw]  
Data file hipocampo\_01.temp.mgf

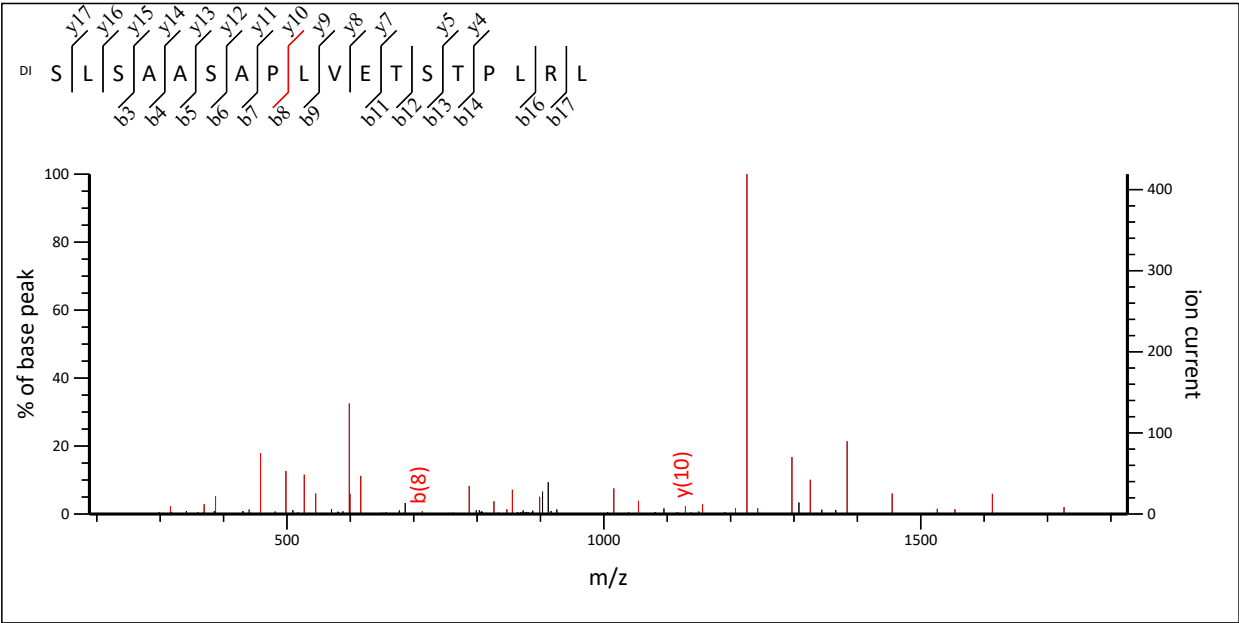

Navigation icons: ? (help), image (download), left arrow, zoom in, zoom out, zoom reset, 188.36 to 1826.08 (mass range), zoom in, right arrow.

Label all possible matches ☐ Label matches used for scoring ☒

Monoisotopic mass of neutral peptide Mr(calc): 1840.0305  
Variable modifications:  
N-term : Dimethyl (N-term)  
Ions Score: 125 Expect: 1e-008  
Matches : 34/162 fragment ions using 38 most intense peaks ([help](#))

| #  | b         | b <sup>++</sup> | b <sup>*</sup> | b <sup>+++</sup> | b <sup>0</sup> | b <sup>0++</sup> | Seq. | y         | y <sup>++</sup> | y <sup>*</sup> | y <sup>+++</sup> | y <sup>0</sup> | y <sup>0++</sup> | #  |
|----|-----------|-----------------|----------------|------------------|----------------|------------------|------|-----------|-----------------|----------------|------------------|----------------|------------------|----|
| 1  | 116.0706  | 58.5389         |                |                  | 98.0600        | 49.5337          | S    |           |                 |                |                  |                |                  | 18 |
| 2  | 229.1547  | 115.0810        |                |                  | 211.1441       | 106.0757         | L    | 1725.9745 | 863.4909        | 1708.9480      | 854.9776         | 1707.9640      | 854.4856         | 17 |
| 3  | 316.1867  | 158.5970        |                |                  | 298.1761       | 149.5917         | S    | 1612.8905 | 806.9489        | 1595.8639      | 798.4356         | 1594.8799      | 797.9436         | 16 |
| 4  | 387.2238  | 194.1155        |                |                  | 369.2132       | 185.1103         | A    | 1525.8584 | 763.4329        | 1508.8319      | 754.9196         | 1507.8479      | 754.4276         | 15 |
| 5  | 458.2609  | 229.6341        |                |                  | 440.2504       | 220.6288         | A    | 1454.8213 | 727.9143        | 1437.7948      | 719.4010         | 1436.8108      | 718.9090         | 14 |
| 6  | 545.2930  | 273.1501        |                |                  | 527.2824       | 264.1448         | S    | 1383.7842 | 692.3957        | 1366.7577      | 683.8825         | 1365.7736      | 683.3905         | 13 |
| 7  | 616.3301  | 308.6687        |                |                  | 598.3195       | 299.6634         | A    | 1296.7522 | 648.8797        | 1279.7256      | 640.3665         | 1278.7416      | 639.8744         | 12 |
| 8  | 713.3828  | 357.1951        |                |                  | 695.3723       | 348.1898         | P    | 1225.7151 | 613.3612        | 1208.6885      | 604.8479         | 1207.7045      | 604.3559         | 11 |
| 9  | 826.4669  | 413.7371        |                |                  | 808.4563       | 404.7318         | L    | 1128.6623 | 564.8348        | 1111.6358      | 556.3215         | 1110.6517      | 555.8295         | 10 |
| 10 | 925.5353  | 463.2713        |                |                  | 907.5247       | 454.2660         | V    | 1015.5782 | 508.2928        | 998.5517       | 499.7795         | 997.5677       | 499.2875         | 9  |
| 11 | 1054.5779 | 527.7926        |                |                  | 1036.5673      | 518.7873         | E    | 916.5098  | 458.7585        | 899.4833       | 450.2453         | 898.4993       | 449.7533         | 8  |
| 12 | 1155.6256 | 578.3164        |                |                  | 1137.6150      | 569.3111         | T    | 787.4672  | 394.2373        | 770.4407       | 385.7240         | 769.4567       | 385.2320         | 7  |
| 13 | 1242.6576 | 621.8324        |                |                  | 1224.6470      | 612.8272         | S    | 686.4196  | 343.7134        | 669.3930       | 335.2001         | 668.4090       | 334.7081         | 6  |
| 14 | 1343.7053 | 672.3563        |                |                  | 1325.6947      | 663.3510         | T    | 599.3875  | 300.1974        | 582.3610       | 291.6841         | 581.3770       | 291.1921         | 5  |
| 15 | 1440.7581 | 720.8827        |                |                  | 1422.7475      | 711.8774         | P    | 498.3398  | 249.6736        | 481.3133       | 241.1603         |                |                  | 4  |
| 16 | 1553.8421 | 777.4247        |                |                  | 1535.8315      | 768.4194         | L    | 401.2871  | 201.1472        | 384.2605       | 192.6339         |                |                  | 3  |
| 17 | 1709.9432 | 855.4753        | 1692.9167      | 846.9620         | 1691.9327      | 846.4700         | R    | 288.2030  | 144.6051        | 271.1765       | 136.0919         |                |                  | 2  |
| 18 |           |                 |                |                  |                |                  | L    | 132.1019  | 66.5546         |                |                  |                |                  | 1  |

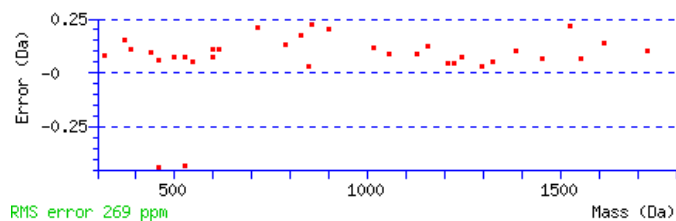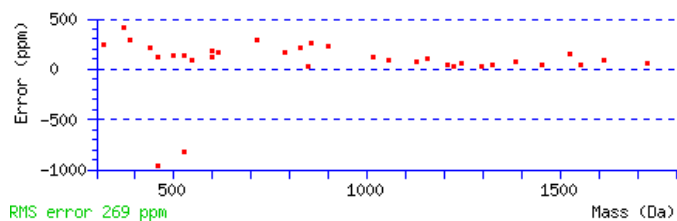

NCBI **BLAST** search of [SLSAASAPLVETSTPLRL](#)

(Parameters: blastp, nr protein database, expect=20000, no filter, PAM30)

Other BLAST [web gateways](#)

#### All matches to this query

| Score | Mr(calc)  | Delta   | Sequence                             |
|-------|-----------|---------|--------------------------------------|
| 124.9 | 1840.0305 | 0.0042  | <a href="#">SLSAASAPLVETSTPLRL</a>   |
| 30.1  | 1840.1246 | -0.0899 | <a href="#">PLGARRATKPLGTDRA</a>     |
| 29.4  | 1839.8879 | 0.1468  | <a href="#">SSSASSGPPGSSAASAPGIT</a> |
| 27.4  | 1840.0495 | -0.0148 | <a href="#">PPLSATVTLTIAVSDNIP</a>   |
| 25.0  | 1840.1174 | -0.0827 | <a href="#">SFYVSPLKRQLVSRP</a>      |
| 24.1  | 1839.8859 | 0.1488  | <a href="#">QDEGPECIPPMQTVRI</a>     |
| 23.4  | 1839.9563 | 0.0784  | <a href="#">QLAASRGHGTCVQALTGP</a>   |
| 23.4  | 1840.1497 | -0.1149 | <a href="#">ASSAKMGLVETKLAIIP</a>    |
| 23.0  | 1839.9690 | 0.0657  | <a href="#">EAELNTRVNRQTVAASLP</a>   |
| 22.4  | 1839.9880 | 0.0467  | <a href="#">PGSSLPTSLTIPNPRET</a>    |

Mascot: <http://www.matrixscience.com/>



# Mascot Search Results

## Peptide View

MS/MS Fragmentation of **LLDEGHYPVRESPIDTA**  
Found in **SCG1\_MOUSE** in **SwissProt**, Secretogranin-1 OS=Mus musculus GN=Chgb PE=1 SV=2

Match to Query 7937: 1938.985088 from(970.499820,2+) intensity(10820.4620) scans(6117) rawscans(sn6117) rtinseconds(2384.1047) index(4055)

Title: 4056: Scan 6117 (rt=2384.1) [C:\Users\Administrador\Desktop\AMOSTRAS NO ORBITRAP LEANDRO RODAR NOVAMENTE\CORTEX\cortex\_01.raw]  
Data file cortex\_01.temp.mgf

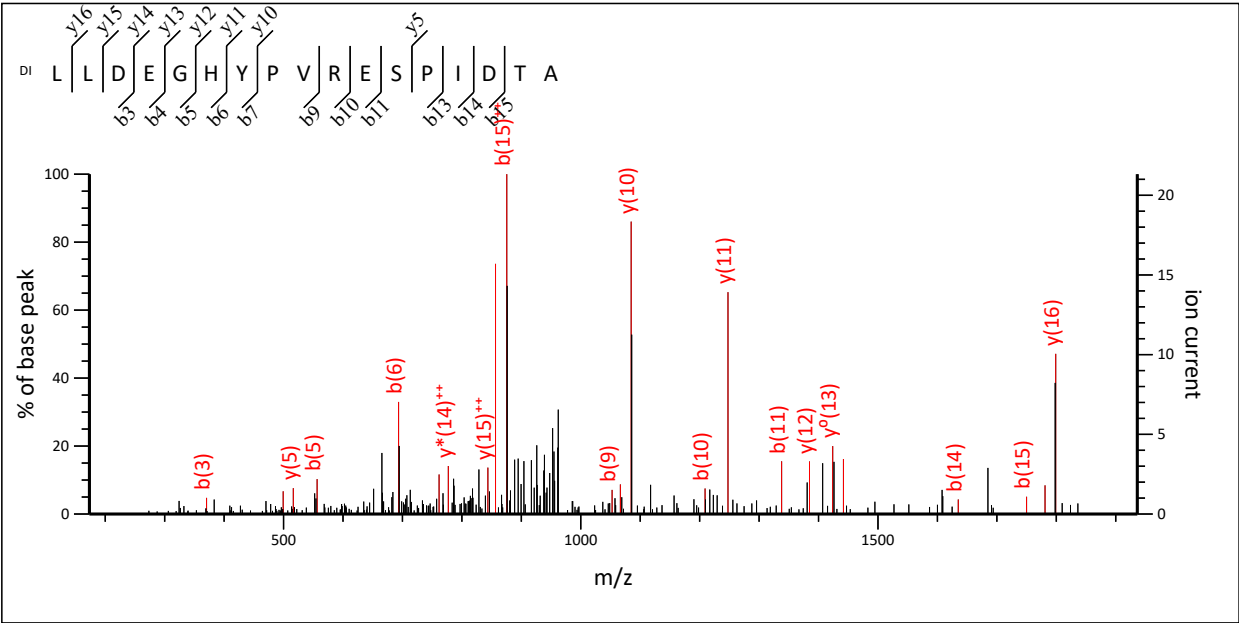

Navigation icons: ? (help), image (download), left arrow, zoom in, zoom out, zoom reset, 173.4 to 1936.29 (mass range), zoom in, right arrow.

Label all possible matches ☐ Label matches used for scoring ☒

Monoisotopic mass of neutral peptide Mr(calc): 1938.9687  
Variable modifications:  
N-term : Dimethyl (N-term)  
Ions Score: 46 Expect: 0.89  
Matches : 24/154 fragment ions using 48 most intense peaks ([help](#))

| #  | b         | b <sup>++</sup> | b <sup>*</sup> | b <sup>+++</sup> | b <sup>0</sup> | b <sup>0++</sup> | Seq. | y         | y <sup>++</sup> | y <sup>*</sup> | y <sup>+++</sup> | y <sup>0</sup> | y <sup>0++</sup> | #  |
|----|-----------|-----------------|----------------|------------------|----------------|------------------|------|-----------|-----------------|----------------|------------------|----------------|------------------|----|
| 1  | 142.1226  | 71.5650         |                |                  |                |                  | L    |           |                 |                |                  |                |                  | 17 |
| 2  | 255.2067  | 128.1070        |                |                  |                |                  | L    | 1798.8606 | 899.9339        | 1781.8341      | 891.4207         | 1780.8501      | 890.9287         | 16 |
| 3  | 370.2336  | 185.6205        |                |                  | 352.2231       | 176.6152         | D    | 1685.7766 | 843.3919        | 1668.7500      | 834.8786         | 1667.7660      | 834.3866         | 15 |
| 4  | 499.2762  | 250.1418        |                |                  | 481.2657       | 241.1365         | E    | 1570.7496 | 785.8784        | 1553.7231      | 777.3652         | 1552.7390      | 776.8732         | 14 |
| 5  | 556.2977  | 278.6525        |                |                  | 538.2871       | 269.6472         | G    | 1441.7070 | 721.3571        | 1424.6805      | 712.8439         | 1423.6965      | 712.3519         | 13 |
| 6  | 693.3566  | 347.1819        |                |                  | 675.3461       | 338.1767         | H    | 1384.6856 | 692.8464        | 1367.6590      | 684.3331         | 1366.6750      | 683.8411         | 12 |
| 7  | 856.4199  | 428.7136        |                |                  | 838.4094       | 419.7083         | Y    | 1247.6266 | 624.3170        | 1230.6001      | 615.8037         | 1229.6161      | 615.3117         | 11 |
| 8  | 953.4727  | 477.2400        |                |                  | 935.4621       | 468.2347         | P    | 1084.5633 | 542.7853        | 1067.5368      | 534.2720         | 1066.5528      | 533.7800         | 10 |
| 9  | 1052.5411 | 526.7742        |                |                  | 1034.5306      | 517.7689         | V    | 987.5106  | 494.2589        | 970.4840       | 485.7456         | 969.5000       | 485.2536         | 9  |
| 10 | 1208.6422 | 604.8248        | 1191.6157      | 596.3115         | 1190.6317      | 595.8195         | R    | 888.4421  | 444.7247        | 871.4156       | 436.2114         | 870.4316       | 435.7194         | 8  |
| 11 | 1337.6848 | 669.3461        | 1320.6583      | 660.8328         | 1319.6743      | 660.3408         | E    | 732.3410  | 366.6742        |                |                  | 714.3305       | 357.6689         | 7  |
| 12 | 1424.7169 | 712.8621        | 1407.6903      | 704.3488         | 1406.7063      | 703.8568         | S    | 603.2984  | 302.1529        |                |                  | 585.2879       | 293.1476         | 6  |
| 13 | 1521.7696 | 761.3884        | 1504.7431      | 752.8752         | 1503.7591      | 752.3832         | P    | 516.2664  | 258.6368        |                |                  | 498.2558       | 249.6316         | 5  |
| 14 | 1634.8537 | 817.9305        | 1617.8271      | 809.4172         | 1616.8431      | 808.9252         | I    | 419.2136  | 210.1105        |                |                  | 401.2031       | 201.1052         | 4  |
| 15 | 1749.8806 | 875.4440        | 1732.8541      | 866.9307         | 1731.8701      | 866.4387         | D    | 306.1296  | 153.5684        |                |                  | 288.1190       | 144.5631         | 3  |
| 16 | 1850.9283 | 925.9678        | 1833.9018      | 917.4545         | 1832.9177      | 916.9625         | T    | 191.1026  | 96.0550         |                |                  | 173.0921       | 87.0497          | 2  |
| 17 |           |                 |                |                  |                |                  | A    | 90.0550   | 45.5311         |                |                  |                |                  | 1  |

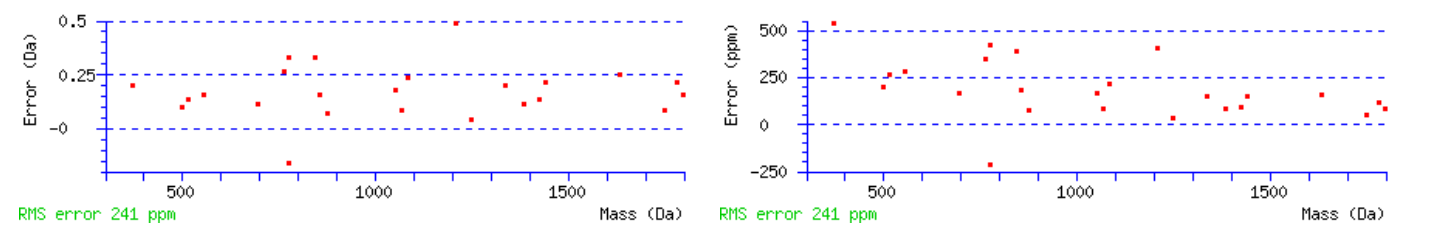

NCBI BLAST search of [LLDEGHYPVRESPIDTA](#)  
(Parameters: blastp, nr protein database, expect=20000, no filter, PAM30)  
Other BLAST [web gateways](#)

All matches to this query

| Score | Mr(calc)  | Delta   | Sequence                             |
|-------|-----------|---------|--------------------------------------|
| 45.6  | 1938.9687 | 0.0164  | <a href="#">LLDEGHYPVRESPIDTA</a>    |
| 10.7  | 1939.1393 | -0.1542 | <a href="#">TVPASAHKIDYSKRRD</a>     |
| 10.7  | 1938.9662 | 0.0189  | <a href="#">PPFMDGLQPGYRPVQPP</a>    |
| 10.1  | 1938.9981 | -0.0130 | <a href="#">ATLSHLMMPKPPNLIM</a>     |
| 9.9   | 1938.9850 | 0.0001  | <a href="#">SAASPAQQLPTSHPGPGPHA</a> |
| 8.4   | 1938.8928 | 0.0923  | <a href="#">QVIEVACGSHHSMALAADG</a>  |
| 8.2   | 1938.9067 | 0.0784  | <a href="#">LNGPFTVVVKESCDGMGD</a>   |
| 7.8   | 1939.0163 | -0.0312 | <a href="#">QAPKASTGPHLANGYTTAV</a>  |
| 7.6   | 1938.8853 | 0.0998  | <a href="#">TMSGTHMVHMLCPSQVS</a>    |
| 7.2   | 1939.1583 | -0.1732 | <a href="#">EEIPPAVAPSIPLLLPLP</a>   |

Mascot: <http://www.matrixscience.com/>

# Mascot Search Results

## Peptide View

MS/MS Fragmentation of **SFARAPQLDL**  
Found in **SCG1\_MOUSE** in **SwissProt**, Secretogranin-1 OS=Mus musculus GN=Chgb PE=1 SV=2

Match to Query 2758: 1148.654348 from(575.334450,2+) intensity(65289.3360) scans(7387) rawscans(sn7387) rtinseconds(2858.5866) index(5112)

Title: 5113: Scan 7387 (rt=2858.59) [C:\Users\Administrador\Desktop\AMOSTRAS NO ORBITRAP LEANDRO RODAR NOVAMENTE\HIPOCAMPO\hipocampo\_02.raw]  
Data file hipocampo\_02.temp.mgf

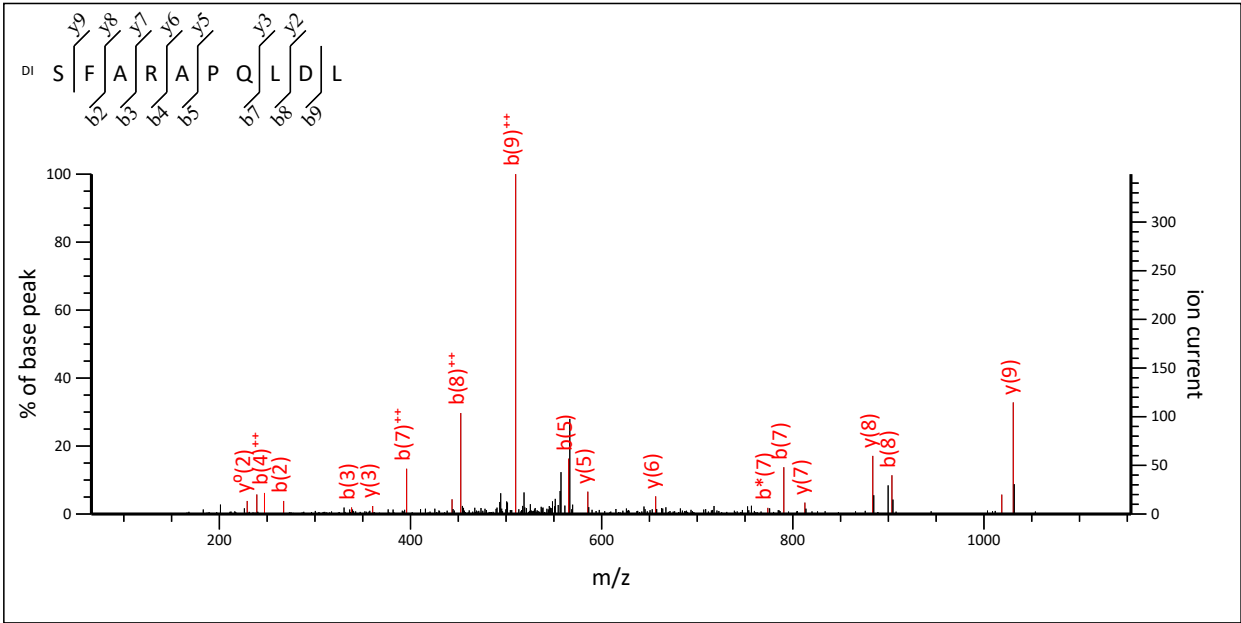

Navigation icons: ? (help), zoom in, zoom out, reset, and a range selector showing 66.13 to 1153.82.

Label all possible matches ☐ Label matches used for scoring ☒

Monoisotopic mass of neutral peptide Mr(calc): 1148.6492  
Variable modifications:  
N-term : Dimethyl:2H(4) (N-term)  
Ions Score: 62 Expect: 0.019  
Matches : 22/94 fragment ions using 27 most intense peaks ([help](#))

| #  | b         | b <sup>++</sup> | b <sup>*</sup> | b <sup>+++</sup> | b <sup>0</sup> | b <sup>0++</sup> | Seq. | y         | y <sup>++</sup> | y <sup>*</sup> | y <sup>+++</sup> | y <sup>0</sup> | y <sup>0++</sup> | #  |
|----|-----------|-----------------|----------------|------------------|----------------|------------------|------|-----------|-----------------|----------------|------------------|----------------|------------------|----|
| 1  | 120.0957  | 60.5515         |                |                  | 102.0851       | 51.5462          | S    |           |                 |                |                  |                |                  | 10 |
| 2  | 267.1641  | 134.0857        |                |                  | 249.1536       | 125.0804         | F    | 1030.5680 | 515.7876        | 1013.5415      | 507.2744         | 1012.5574      | 506.7824         | 9  |
| 3  | 338.2012  | 169.6043        |                |                  | 320.1907       | 160.5990         | A    | 883.4996  | 442.2534        | 866.4730       | 433.7402         | 865.4890       | 433.2482         | 8  |
| 4  | 494.3023  | 247.6548        | 477.2758       | 239.1415         | 476.2918       | 238.6495         | R    | 812.4625  | 406.7349        | 795.4359       | 398.2216         | 794.4519       | 397.7296         | 7  |
| 5  | 565.3395  | 283.1734        | 548.3129       | 274.6601         | 547.3289       | 274.1681         | A    | 656.3614  | 328.6843        | 639.3348       | 320.1710         | 638.3508       | 319.6790         | 6  |
| 6  | 662.3922  | 331.6998        | 645.3657       | 323.1865         | 644.3817       | 322.6945         | P    | 585.3243  | 293.1658        | 568.2977       | 284.6525         | 567.3137       | 284.1605         | 5  |
| 7  | 790.4508  | 395.7290        | 773.4243       | 387.2158         | 772.4402       | 386.7238         | Q    | 488.2715  | 244.6394        | 471.2449       | 236.1261         | 470.2609       | 235.6341         | 4  |
| 8  | 903.5349  | 452.2711        | 886.5083       | 443.7578         | 885.5243       | 443.2658         | L    | 360.2129  | 180.6101        |                |                  | 342.2023       | 171.6048         | 3  |
| 9  | 1018.5618 | 509.7845        | 1001.5353      | 501.2713         | 1000.5512      | 500.7793         | D    | 247.1288  | 124.0681        |                |                  | 229.1183       | 115.0628         | 2  |
| 10 |           |                 |                |                  |                |                  | L    | 132.1019  | 66.5546         |                |                  |                |                  | 1  |

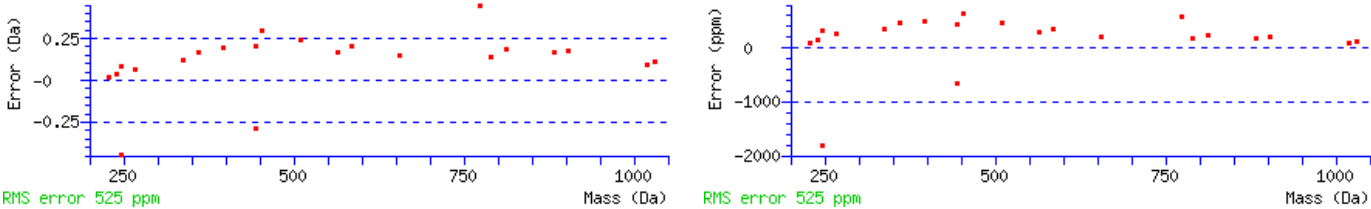

NCBI **BLAST** search of [SFARAPQLDL](#)

(Parameters: blastp, nr protein database, expect=20000, no filter, PAM30)

Other BLAST [web gateways](#)

**All matches to this query**

| Score | Mr(calc)  | Delta   | Sequence                    |
|-------|-----------|---------|-----------------------------|
| 61.8  | 1148.6492 | 0.0052  | <a href="#">SFARAPQLDL</a>  |
| 28.6  | 1148.7117 | -0.0574 | <a href="#">RKQAQGGIDI</a>  |
| 28.6  | 1148.6331 | 0.0213  | <a href="#">RQNAQNLDL</a>   |
| 28.3  | 1148.5601 | 0.0943  | <a href="#">GEIYDAAIDL</a>  |
| 28.3  | 1148.6077 | 0.0466  | <a href="#">FGSSAIQALDL</a> |
| 27.4  | 1148.6023 | 0.0520  | <a href="#">DDEDKDIDL</a>   |
| 26.4  | 1148.6946 | -0.0403 | <a href="#">VDARLQALDL</a>  |
| 25.9  | 1148.6569 | -0.0025 | <a href="#">VDLKEYVGY</a>   |
| 25.9  | 1148.6106 | 0.0437  | <a href="#">DSVDSHLLDL</a>  |
| 25.8  | 1148.6892 | -0.0349 | <a href="#">KGGALAADIDI</a> |

Mascot: <http://www.matrixscience.com/>

# Mascot Search Results

## Peptide View

MS/MS Fragmentation of **ANSNPAMPRE**  
Found in **SMS\_MOUSE** in **SwissProt**, Somatostatin OS=Mus musculus GN=Sst PE=3 SV=1

Match to Query 4543: 1200.559268 from(601.286910,2+) intensity(22792.0880) scans(2542) rawscans(sn2542) rtinseconds(1322.4824) index(413)  
Title: 414: Scan 2542 (rt=1322.48) [C:\Users\Administrador\Desktop\AMOSTRAS NO ORBITRAP LEANDRO RODAR NOVAMENTE\HIPOCAMPO\hipocampo\_04.raw]  
Data file hipocampo\_04.temp.mgf

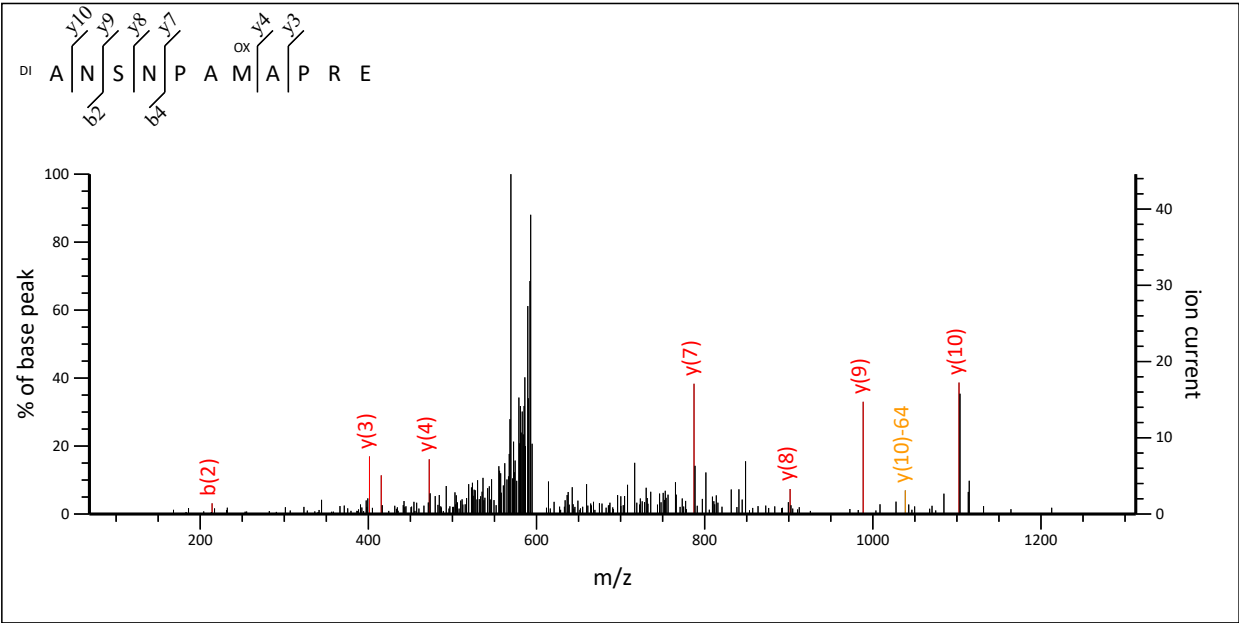

Navigation icons: ? (help), zoom in, zoom out, zoom reset, pan, and a range selector showing 68.23 to 1312.74.

Label all possible matches ☐ Label matches used for scoring ☒

Monoisotopic mass of neutral peptide Mr(calc): 1200.5557  
Variable modifications:  
N-term : Dimethyl (N-term)  
M7 : Oxidation (M), with neutral losses 0.0000(shown in table), 63.9983  
Ions Score: 28 Expect: 48  
Matches : 10/172 fragment ions using 20 most intense peaks ([help](#))

| #  | b         | b <sup>++</sup> | b <sup>*</sup> | b <sup>+++</sup> | b <sup>0</sup> | b <sup>0++</sup> | Seq. | y         | y <sup>++</sup> | y <sup>*</sup> | y <sup>+++</sup> | y <sup>0</sup> | y <sup>0++</sup> | #  |
|----|-----------|-----------------|----------------|------------------|----------------|------------------|------|-----------|-----------------|----------------|------------------|----------------|------------------|----|
| 1  | 100.0757  | 50.5415         |                |                  |                |                  | A    |           |                 |                |                  |                |                  | 11 |
| 2  | 214.1186  | 107.5629        | 197.0921       | 99.0497          |                |                  | N    | 1102.4946 | 551.7509        | 1085.4680      | 543.2377         | 1084.4840      | 542.7456         | 10 |
| 3  | 301.1506  | 151.0790        | 284.1241       | 142.5657         | 283.1401       | 142.0737         | S    | 988.4517  | 494.7295        | 971.4251       | 486.2162         | 970.4411       | 485.7242         | 9  |
| 4  | 415.1936  | 208.1004        | 398.1670       | 199.5871         | 397.1830       | 199.0951         | N    | 901.4196  | 451.2135        | 884.3931       | 442.7002         | 883.4091       | 442.2082         | 8  |
| 5  | 512.2463  | 256.6268        | 495.2198       | 248.1135         | 494.2358       | 247.6215         | P    | 787.3767  | 394.1920        | 770.3502       | 385.6787         | 769.3661       | 385.1867         | 7  |
| 6  | 583.2835  | 292.1454        | 566.2569       | 283.6321         | 565.2729       | 283.1401         | A    | 690.3239  | 345.6656        | 673.2974       | 337.1523         | 672.3134       | 336.6603         | 6  |
| 7  | 730.3189  | 365.6631        | 713.2923       | 357.1498         | 712.3083       | 356.6578         | M    | 619.2868  | 310.1470        | 602.2603       | 301.6338         | 601.2763       | 301.1418         | 5  |
| 8  | 801.3560  | 401.1816        | 784.3294       | 392.6683         | 783.3454       | 392.1763         | A    | 472.2514  | 236.6293        | 455.2249       | 228.1161         | 454.2409       | 227.6241         | 4  |
| 9  | 898.4087  | 449.7080        | 881.3822       | 441.1947         | 880.3982       | 440.7027         | P    | 401.2143  | 201.1108        | 384.1878       | 192.5975         | 383.2037       | 192.1055         | 3  |
| 10 | 1054.5098 | 527.7586        | 1037.4833      | 519.2453         | 1036.4993      | 518.7533         | R    | 304.1615  | 152.5844        | 287.1350       | 144.0711         | 286.1510       | 143.5791         | 2  |
| 11 |           |                 |                |                  |                |                  | E    | 148.0604  | 74.5339         |                |                  | 130.0499       | 65.5286          | 1  |

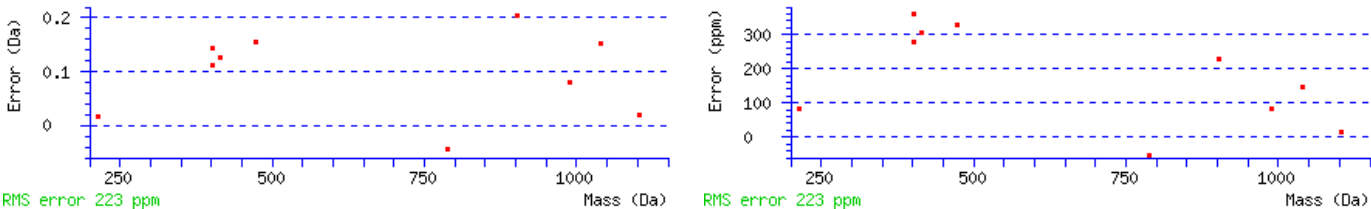

NCBI **BLAST** search of [ANSNPAMAPRE](#)

(Parameters: blastp, nr protein database, expect=20000, no filter, PAM30)

Other BLAST [web gateways](#)

**All matches to this query**

| Score | Mr(calc)  | Delta   | Sequence                     |
|-------|-----------|---------|------------------------------|
| 27.9  | 1200.5557 | 0.0036  | <a href="#">ANSNPAMAPRE</a>  |
| 20.5  | 1200.5643 | -0.0050 | <a href="#">MPGPAMPGPAMP</a> |
| 13.9  | 1200.7871 | -0.2278 | <a href="#">LLNAFTKKE</a>    |
| 13.9  | 1200.5411 | 0.0181  | <a href="#">PDGTQFANGPQ</a>  |
| 13.6  | 1200.6208 | -0.0615 | <a href="#">PGAPPAFASPPD</a> |
| 13.1  | 1200.6176 | -0.0583 | <a href="#">PENGEEAVAVL</a>  |
| 13.0  | 1200.6362 | -0.0769 | <a href="#">ILCTQPAGVPE</a>  |
| 11.7  | 1200.5986 | -0.0394 | <a href="#">GAGSNPGDKTLE</a> |
| 11.2  | 1200.6462 | -0.0870 | <a href="#">ANSAGGRIVISE</a> |
| 10.6  | 1200.7566 | -0.1973 | <a href="#">LRGLCVAALVL</a>  |

**Mascot:** <http://www.matrixscience.com/>

# Mascot Search Results

## Peptide View

MS/MS Fragmentation of **SANSPAMAPRE**  
Found in **SMS\_MOUSE** in **SwissProt**, Somatostatin OS=Mus musculus GN=Sst PE=3 SV=1

Match to Query 3640: 1275.620628 from(638.817590,2+) intensity(145209.3100) scans(2791) rawscans(sn2791) rtinseconds(1276.3717) index(1116)  
Title: 1117: Scan 2791 (rt=1276.37) [C:\Users\Administrador\Desktop\AMOSTRAS NO ORBITRAP LEANDRO RODAR NOVAMENTE\HIPOCAMPO\hipocampo\_01.raw]  
Data file hipocampo\_01.temp.mgf

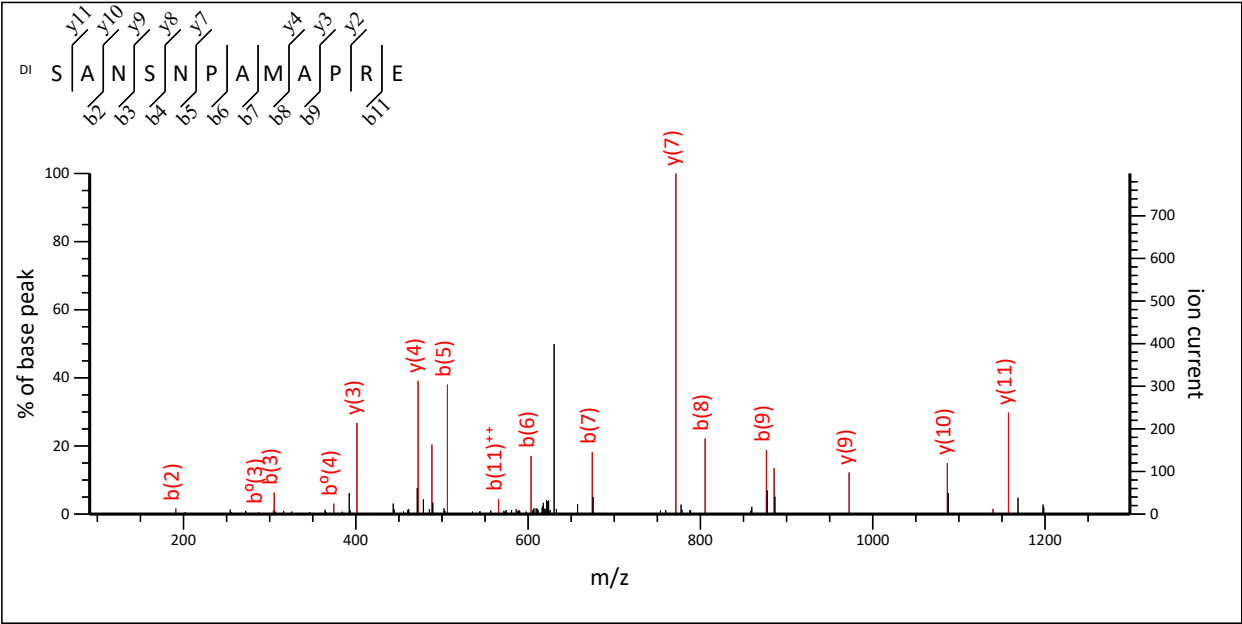

 to 

Label all possible matches ☐ Label matches used for scoring ☒

Monoisotopic mass of neutral peptide Mr(calc): 1275.6179  
Variable modifications:  
N-term : Dimethyl:2H(4) (N-term)  
Ions Score: 77 Expect: 0.00057  
Matches : 26/126 fragment ions using 36 most intense peaks ([help](#))

| #  | b         | b <sup>++</sup> | b <sup>*</sup> | b <sup>+++</sup> | b <sup>0</sup> | b <sup>0++</sup> | Seq. | y         | y <sup>++</sup> | y <sup>*</sup> | y <sup>+++</sup> | y <sup>0</sup> | y <sup>0++</sup> | #  |
|----|-----------|-----------------|----------------|------------------|----------------|------------------|------|-----------|-----------------|----------------|------------------|----------------|------------------|----|
| 1  | 120.0957  | 60.5515         |                |                  | 102.0851       | 51.5462          | S    |           |                 |                |                  |                |                  | 12 |
| 2  | 191.1328  | 96.0701         |                |                  | 173.1223       | 87.0648          | A    | 1157.5368 | 579.2720        | 1140.5102      | 570.7588         | 1139.5262      | 570.2667         | 11 |
| 3  | 305.1758  | 153.0915        | 288.1492       | 144.5782         | 287.1652       | 144.0862         | N    | 1086.4997 | 543.7535        | 1069.4731      | 535.2402         | 1068.4891      | 534.7482         | 10 |
| 4  | 392.2078  | 196.6075        | 375.1812       | 188.0943         | 374.1972       | 187.6022         | S    | 972.4567  | 486.7320        | 955.4302       | 478.2187         | 954.4462       | 477.7267         | 9  |
| 5  | 506.2507  | 253.6290        | 489.2242       | 245.1157         | 488.2401       | 244.6237         | N    | 885.4247  | 443.2160        | 868.3982       | 434.7027         | 867.4141       | 434.2107         | 8  |
| 6  | 603.3035  | 302.1554        | 586.2769       | 293.6421         | 585.2929       | 293.1501         | P    | 771.3818  | 386.1945        | 754.3552       | 377.6813         | 753.3712       | 377.1892         | 7  |
| 7  | 674.3406  | 337.6739        | 657.3140       | 329.1607         | 656.3300       | 328.6686         | A    | 674.3290  | 337.6681        | 657.3025       | 329.1549         | 656.3185       | 328.6629         | 6  |
| 8  | 805.3811  | 403.1942        | 788.3545       | 394.6809         | 787.3705       | 394.1889         | M    | 603.2919  | 302.1496        | 586.2654       | 293.6363         | 585.2813       | 293.1443         | 5  |
| 9  | 876.4182  | 438.7127        | 859.3916       | 430.1995         | 858.4076       | 429.7074         | A    | 472.2514  | 236.6293        | 455.2249       | 228.1161         | 454.2409       | 227.6241         | 4  |
| 10 | 973.4709  | 487.2391        | 956.4444       | 478.7258         | 955.4604       | 478.2338         | P    | 401.2143  | 201.1108        | 384.1878       | 192.5975         | 383.2037       | 192.1055         | 3  |
| 11 | 1129.5721 | 565.2897        | 1112.5455      | 556.7764         | 1111.5615      | 556.2844         | R    | 304.1615  | 152.5844        | 287.1350       | 144.0711         | 286.1510       | 143.5791         | 2  |
| 12 |           |                 |                |                  |                |                  | E    | 148.0604  | 74.5339         |                |                  | 130.0499       | 65.5286          | 1  |

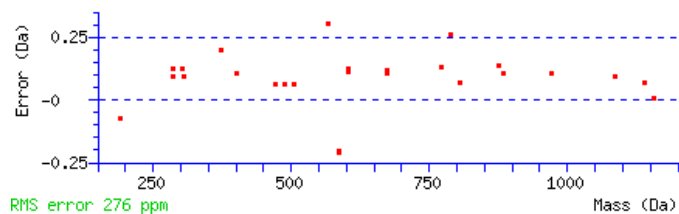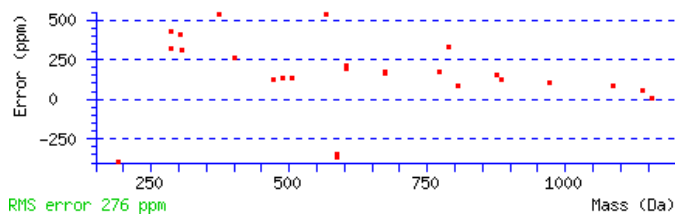

NCBI **BLAST** search of [SANSNPAMAPRE](#)

(Parameters: blastp, nr protein database, expect=20000, no filter, PAM30)

Other BLAST [web gateways](#)

#### All matches to this query

| Score | Mr(calc)  | Delta   | Sequence                      |
|-------|-----------|---------|-------------------------------|
| 77.2  | 1275.6179 | 0.0027  | <a href="#">SANSNPAMAPRE</a>  |
| 35.8  | 1275.6245 | -0.0038 | <a href="#">SANTHDIDSLAT</a>  |
| 29.6  | 1275.7237 | -0.1031 | <a href="#">SANSINWARLL</a>   |
| 29.2  | 1275.7972 | -0.1766 | <a href="#">KSLLGSLNSNAT</a>  |
| 24.4  | 1275.6319 | -0.0113 | <a href="#">DNLPPVCDTVAT</a>  |
| 24.3  | 1275.6964 | -0.0758 | <a href="#">RLTGLDAGHSAT</a>  |
| 23.8  | 1275.7150 | -0.0944 | <a href="#">ILNALGQNCPR</a>   |
| 23.7  | 1275.5475 | 0.0731  | <a href="#">CAAGVCVPGEEAT</a> |
| 23.7  | 1275.6132 | 0.0074  | <a href="#">SAPSPLDASDGLD</a> |
| 23.7  | 1275.6327 | -0.0121 | <a href="#">SAIAMPAPMMQP</a>  |

Mascot: <http://www.matrixscience.com/>



## Mascot Search Results

### Peptide View

### MS/MS Fragmentation of SANSNPAMAPRE

Found in **SMS MOUSE** in **SwissProt**, Somatostatin OS=Mus musculus GN=Sst PE=3 SV=1

Match to Query 3751: 1291.617208 from(646.815880,2+) intensity(53846.9410) scans(2268) rawscans(sn2268) rtinseconds(1091.4888)  
index(642)

Title: 643: Scan 2268 (rt=1091.49) [C:\Users\Administrador\Desktop\AMOSTRAS NO ORBITRAP LEANDRO RODAR

NOVAMENTE\HIPOCAMPO\hipocampo 01.raw]

Data file hipocampo 01.temp.mgf

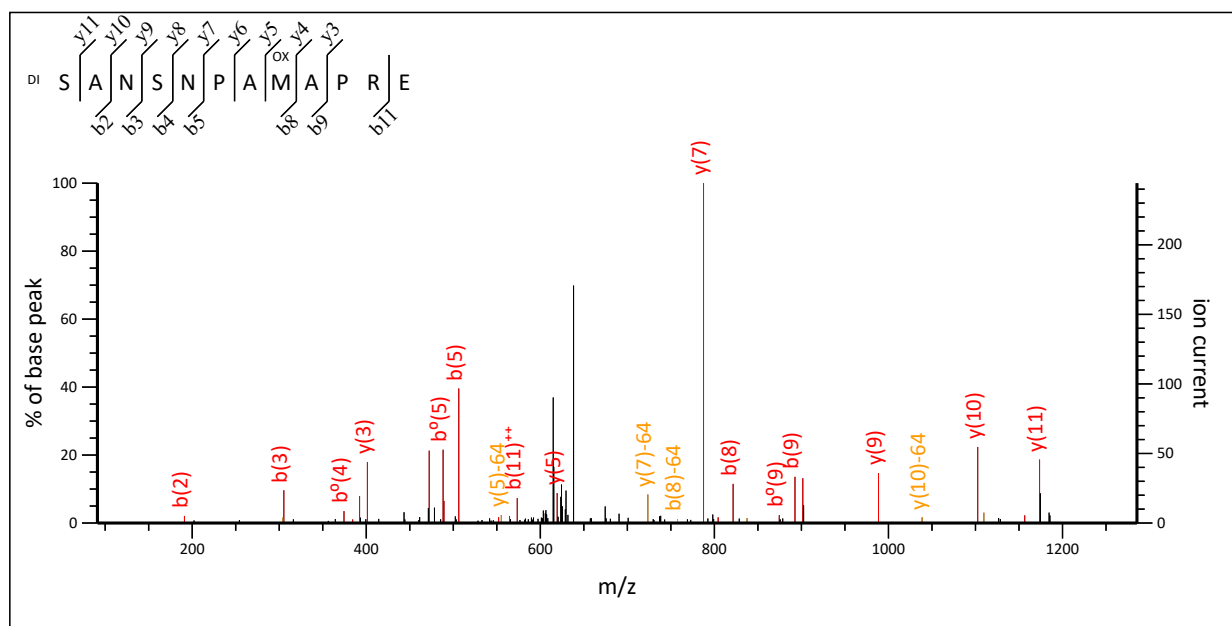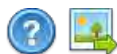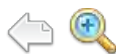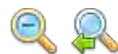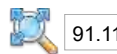

91.11

to

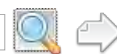

Label all possible matches ☐ Label matches used for scoring ☒

**Monoisotopic mass of neutral peptide Mr(calc): 1291.6128**

Variable modifications:

N-term : Dimethyl:2H(4) (N-term)

M8 : Oxidation (M), with neutral losses 0.0000(shown in table), 63.9983

Ions Score: 61 Expect: 0.022

Matches : 35/192 fragment ions using 50 most intense peaks ([help](#))

| #  | <b>b</b>  | <b>b<sup>++</sup></b> | <b>b*</b> | <b>b<sup>***</sup></b> | <b>b<sup>0</sup></b> | <b>b<sup>0++</sup></b> | Seq. | y         | y <sup>++</sup> | y*        | y <sup>***</sup> | y <sup>0</sup> | y <sup>0++</sup> | #  |
|----|-----------|-----------------------|-----------|------------------------|----------------------|------------------------|------|-----------|-----------------|-----------|------------------|----------------|------------------|----|
| 1  | 120.0957  | 60.5515               |           |                        | 102.0851             | 51.5462                | S    |           |                 |           |                  |                |                  | 12 |
| 2  | 191.1328  | 96.0701               |           |                        | 173.1223             | 87.0648                | A    | 1173.5317 | 587.2695        | 1156.5051 | 578.7562         | 1155.5211      | 578.2642         | 11 |
| 3  | 305.1758  | 153.0915              | 288.1492  | 144.5782               | 287.1652             | 144.0862               | N    | 1102.4946 | 551.7509        | 1085.4680 | 543.2377         | 1084.4840      | 542.7456         | 10 |
| 4  | 392.2078  | 196.6075              | 375.1812  | 188.0943               | 374.1972             | 187.6022               | S    | 988.4517  | 494.7295        | 971.4251  | 486.2162         | 970.4411       | 485.7242         | 9  |
| 5  | 506.2507  | 253.6290              | 489.2242  | 245.1157               | 488.2401             | 244.6237               | N    | 901.4196  | 451.2135        | 884.3931  | 442.7002         | 883.4091       | 442.2082         | 8  |
| 6  | 603.3035  | 302.1554              | 586.2769  | 293.6421               | 585.2929             | 293.1501               | P    | 787.3767  | 394.1920        | 770.3502  | 385.6787         | 769.3661       | 385.1867         | 7  |
| 7  | 674.3406  | 337.6739              | 657.3140  | 329.1607               | 656.3300             | 328.6686               | A    | 690.3239  | 345.6656        | 673.2974  | 337.1523         | 672.3134       | 336.6603         | 6  |
| 8  | 821.3760  | 411.1916              | 804.3494  | 402.6784               | 803.3654             | 402.1863               | M    | 619.2868  | 310.1470        | 602.2603  | 301.6338         | 601.2763       | 301.1418         | 5  |
| 9  | 892.4131  | 446.7102              | 875.3865  | 438.1969               | 874.4025             | 437.7049               | A    | 472.2514  | 236.6293        | 455.2249  | 228.1161         | 454.2409       | 227.6241         | 4  |
| 10 | 989.4659  | 495.2366              | 972.4393  | 486.7233               | 971.4553             | 486.2313               | P    | 401.2143  | 201.1108        | 384.1878  | 192.5975         | 383.2037       | 192.1055         | 3  |
| 11 | 1145.5670 | 573.2871              | 1128.5404 | 564.7739               | 1127.5564            | 564.2818               | R    | 304.1615  | 152.5844        | 287.1350  | 144.0711         | 286.1510       | 143.5791         | 2  |
| 12 |           |                       |           |                        |                      |                        | E    | 148.0604  | 74.5339         |           |                  | 130.0499       | 65.5286          |    |

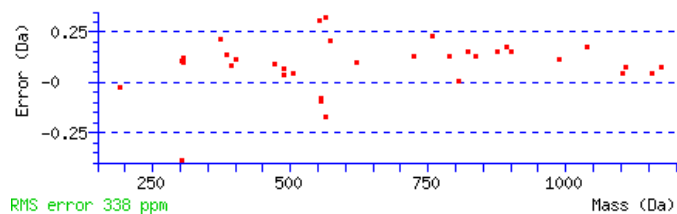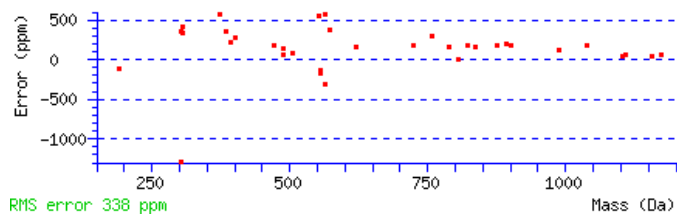

NCBI **BLAST** search of [SANSNPAMAPRE](#)

(Parameters: blastp, nr protein database, expect=20000, no filter, PAM30)

Other BLAST [web gateways](#)

#### All matches to this query

| Score | Mr(calc)  | Delta   | Sequence                     |
|-------|-----------|---------|------------------------------|
| 61.3  | 1291.6128 | 0.0044  | <a href="#">SANSNPAMAPRE</a> |
| 22.3  | 1291.6997 | -0.0825 | <a href="#">VVRFTRSGGNAT</a> |
| 20.7  | 1291.5951 | 0.0221  | <a href="#">SGICINCQHNTA</a> |
| 20.4  | 1291.5966 | 0.0207  | <a href="#">SENLCGLSDLAT</a> |
| 20.0  | 1291.6053 | 0.0119  | <a href="#">QMPPGMTSPRF</a>  |
| 19.4  | 1291.4961 | 0.1211  | <a href="#">MYHGMNPSNGD</a>  |
| 18.9  | 1291.6521 | -0.0349 | <a href="#">FKDALRNSGGDG</a> |
| 18.9  | 1291.6158 | 0.0014  | <a href="#">FSYYGVMALTA</a>  |
| 18.9  | 1291.8860 | -0.2688 | <a href="#">KEKSKSNNTA</a>   |
| 18.9  | 1291.6244 | -0.0072 | <a href="#">KGQTHENSNDG</a>  |

Mascot: <http://www.matrixscience.com/>

# Mascot Search Results

## Peptide View

MS/MS Fragmentation of **AGGPPHPQLNKS**

Found in **SYN1\_MOUSE** in **SwissProt**, Synapsin-1 OS=Mus musculus GN=Syn1 PE=1 SV=2

Match to Query 3599: 1257.689248 from(629.851900,2+) intensity(45609.9800) scans(2659) rawscans(sn2659)

rtinseconds(1240.2501) index(1039)

Title: 1040: Scan 2659 (rt=1240.25) [C:\Users\Administrador\Desktop\AMOSTRAS NO ORBITRAP LEANDRO RODAR NOVAMENTE\CORTEX\cortex\_01.raw]

Data file cortex\_01.temp.mgf

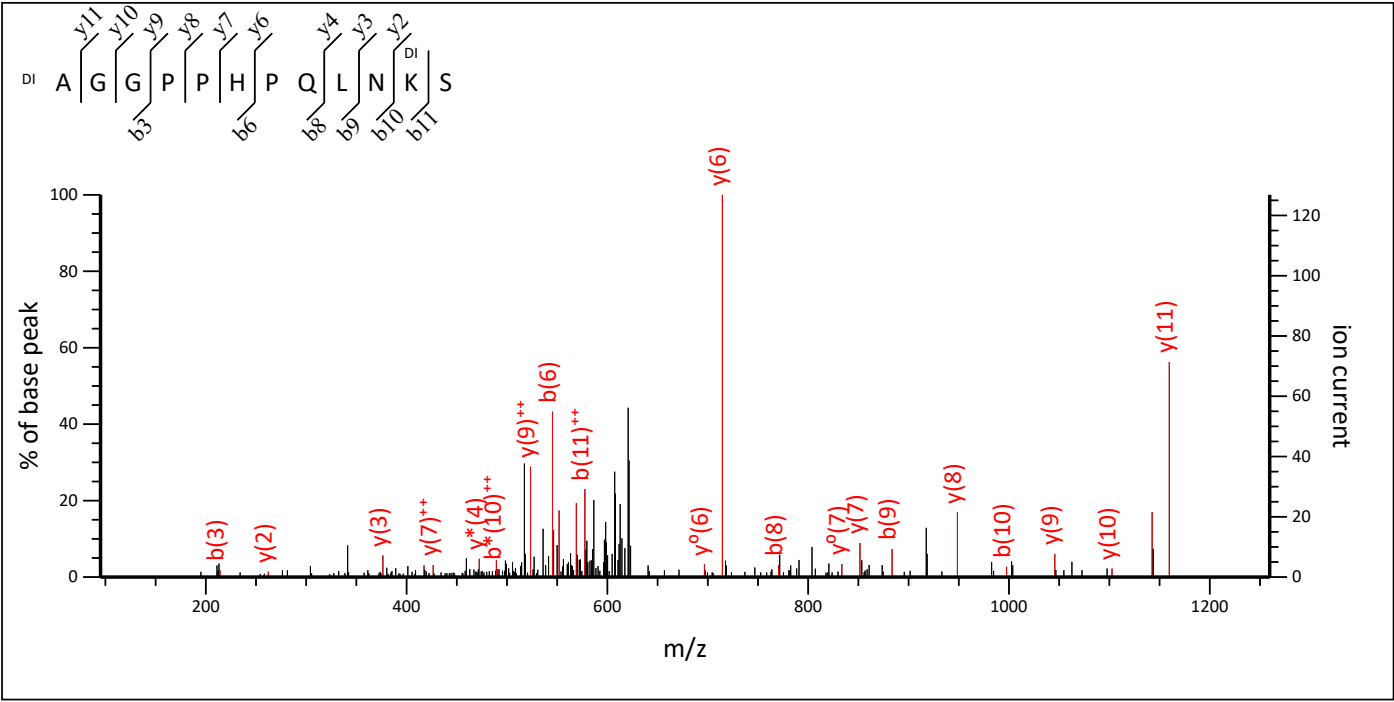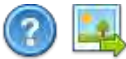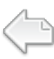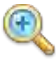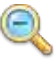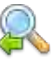

95.15

to

1259.69

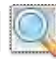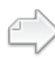

Label all possible matches ☐ Label matches used for scoring ☒

Monoisotopic mass of neutral peptide Mr(calc): 1257.6830

Variable modifications:

N-term : Dimethyl (N-term)

K11 : Dimethyl (K)

Ions Score: 42 Expect: 2

Matches : 26/94 fragment ions using 68 most intense peaks ([help](#))

| #  | b         | b <sup>++</sup> | b <sup>*</sup> | b <sup>*++</sup> | Seq. | y         | y <sup>++</sup> | y <sup>*</sup> | y <sup>*++</sup> | y <sup>0</sup> | y <sup>0++</sup> | #  |
|----|-----------|-----------------|----------------|------------------|------|-----------|-----------------|----------------|------------------|----------------|------------------|----|
| 1  | 100.0757  | 50.5415         |                |                  | A    |           |                 |                |                  |                |                  | 12 |
| 2  | 157.0972  | 79.0522         |                |                  | G    | 1159.6218 | 580.3146        | 1142.5953      | 571.8013         | 1141.6113      | 571.3093         | 11 |
| 3  | 214.1186  | 107.5629        |                |                  | G    | 1102.6004 | 551.8038        | 1085.5738      | 543.2905         | 1084.5898      | 542.7985         | 10 |
| 4  | 311.1714  | 156.0893        |                |                  | P    | 1045.5789 | 523.2931        | 1028.5524      | 514.7798         | 1027.5683      | 514.2878         | 9  |
| 5  | 408.2241  | 204.6157        |                |                  | P    | 948.5261  | 474.7667        | 931.4996       | 466.2534         | 930.5156       | 465.7614         | 8  |
| 6  | 545.2831  | 273.1452        |                |                  | H    | 851.4734  | 426.2403        | 834.4468       | 417.7271         | 833.4628       | 417.2350         | 7  |
| 7  | 642.3358  | 321.6715        |                |                  | P    | 714.4145  | 357.7109        | 697.3879       | 349.1976         | 696.4039       | 348.7056         | 6  |
| 8  | 770.3944  | 385.7008        | 753.3679       | 377.1876         | Q    | 617.3617  | 309.1845        | 600.3352       | 300.6712         | 599.3511       | 300.1792         | 5  |
| 9  | 883.4785  | 442.2429        | 866.4519       | 433.7296         | L    | 489.3031  | 245.1552        | 472.2766       | 236.6419         | 471.2926       | 236.1499         | 4  |
| 10 | 997.5214  | 499.2643        | 980.4948       | 490.7511         | N    | 376.2191  | 188.6132        | 359.1925       | 180.0999         | 358.2085       | 179.6079         | 3  |
| 11 | 1153.6477 | 577.3275        | 1136.6211      | 568.8142         | K    | 262.1761  | 131.5917        | 245.1496       | 123.0784         | 244.1656       | 122.5864         | 2  |
| 12 |           |                 |                |                  | S    | 106.0499  | 53.5286         |                |                  | 88.0393        | 44.5233          | 1  |

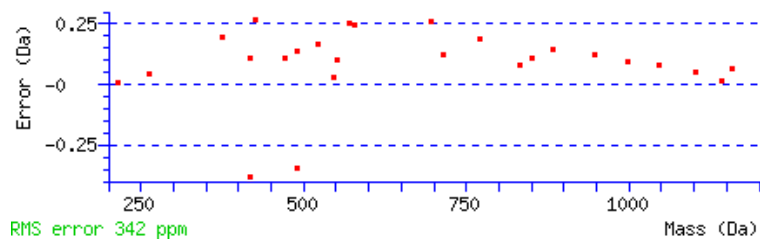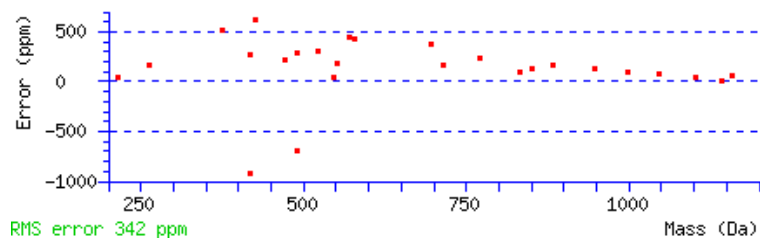

NCBI **BLAST** search of [AGGPPHPQLNKS](#)

(Parameters: blastp, nr protein database, expect=20000, no filter, PAM30)

Other BLAST [web gateways](#)

#### All matches to this query

| Score | Mr(calc)  | Delta   | Sequence                       |
|-------|-----------|---------|--------------------------------|
| 41.9  | 1257.6830 | 0.0063  | <a href="#">AGGPPHPQLNKS</a>   |
| 18.9  | 1257.5949 | 0.0943  | <a href="#">AGGQEAEGSAPTR</a>  |
| 17.6  | 1257.6928 | -0.0036 | <a href="#">ALEESRKLADA</a>    |
| 17.4  | 1257.5858 | 0.1035  | <a href="#">PMQMNQALEM</a>     |
| 16.6  | 1257.5520 | 0.1372  | <a href="#">ANSRGLSDNCHG</a>   |
| 13.8  | 1257.7921 | -0.1029 | <a href="#">ANPPRLGPKKP</a>    |
| 13.7  | 1257.5877 | 0.1015  | <a href="#">ALQDVPGEWS</a>     |
| 13.5  | 1257.6288 | 0.0604  | <a href="#">APHGLPLCTGQH</a>   |
| 13.0  | 1257.6354 | 0.0539  | <a href="#">ANPPTTGAPPGPGP</a> |
| 12.6  | 1257.6201 | 0.0692  | <a href="#">ALQDAASGLQEQ</a>   |

Mascot: <http://www.matrixscience.com/>

Mascot Search Results

Peptide View

MS/MS Fragmentation of **SGPFGQIFRPDNF**  
Found in **TBB4B\_MOUSE** in **SwissProt**, Tubulin beta-4B chain OS=Mus musculus GN=Tubb4b PE=1 SV=1

Match to Query 5040: 1508.746868 from(755.380710,2+) intensity(24802.6890) scans(10611) rawscans(sn10611) rtinseconds(3967.8521) index(7807)  
Title: 7808: Scan 10611 (rt=3967.85) [C:\Users\Administrador\Desktop\AMOSTRAS NO ORBITRAP LEANDRO RODAR NOVAMENTE\HIPOCAMPO\hipocampo\_01.raw]  
Data file hipocampo\_01.temp.mgf

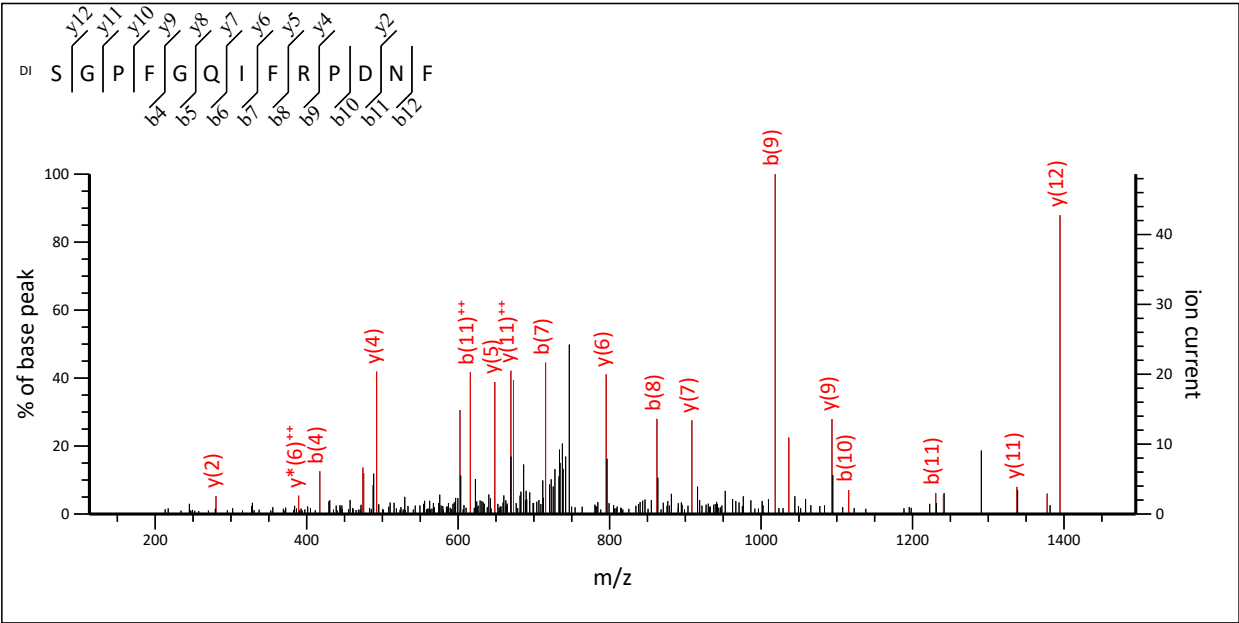

Navigation icons: ? (help), zoom in, zoom out, reset, and a range selector showing 113.14 to 1494.76.

Label all possible matches ☐ Label matches used for scoring ☒

Monoisotopic mass of neutral peptide Mr(calc): 1508.7412  
Variable modifications:  
N-term : Dimethyl (N-term)  
Ions Score: 57 Expect: 0.055  
Matches : 27/128 fragment ions using 48 most intense peaks ([help](#))

| #  | b         | b <sup>++</sup> | b <sup>*</sup> | b <sup>+++</sup> | b <sup>0</sup> | b <sup>0++</sup> | Seq. | y         | y <sup>++</sup> | y <sup>*</sup> | y <sup>+++</sup> | y <sup>0</sup> | y <sup>0++</sup> | #  |
|----|-----------|-----------------|----------------|------------------|----------------|------------------|------|-----------|-----------------|----------------|------------------|----------------|------------------|----|
| 1  | 116.0706  | 58.5389         |                |                  | 98.0600        | 49.5337          | S    |           |                 |                |                  |                |                  | 13 |
| 2  | 173.0921  | 87.0497         |                |                  | 155.0815       | 78.0444          | G    | 1394.6852 | 697.8462        | 1377.6586      | 689.3329         | 1376.6746      | 688.8409         | 12 |
| 3  | 270.1448  | 135.5761        |                |                  | 252.1343       | 126.5708         | P    | 1337.6637 | 669.3355        | 1320.6371      | 660.8222         | 1319.6531      | 660.3302         | 11 |
| 4  | 417.2132  | 209.1103        |                |                  | 399.2027       | 200.1050         | F    | 1240.6109 | 620.8091        | 1223.5844      | 612.2958         | 1222.6004      | 611.8038         | 10 |
| 5  | 474.2347  | 237.6210        |                |                  | 456.2241       | 228.6157         | G    | 1093.5425 | 547.2749        | 1076.5160      | 538.7616         | 1075.5320      | 538.2696         | 9  |
| 6  | 602.2933  | 301.6503        | 585.2667       | 293.1370         | 584.2827       | 292.6450         | Q    | 1036.5211 | 518.7642        | 1019.4945      | 510.2509         | 1018.5105      | 509.7589         | 8  |
| 7  | 715.3774  | 358.1923        | 698.3508       | 349.6790         | 697.3668       | 349.1870         | I    | 908.4625  | 454.7349        | 891.4359       | 446.2216         | 890.4519       | 445.7296         | 7  |
| 8  | 862.4458  | 431.7265        | 845.4192       | 423.2132         | 844.4352       | 422.7212         | F    | 795.3784  | 398.1928        | 778.3519       | 389.6796         | 777.3678       | 389.1876         | 6  |
| 9  | 1018.5469 | 509.7771        | 1001.5203      | 501.2638         | 1000.5363      | 500.7718         | R    | 648.3100  | 324.6586        | 631.2835       | 316.1454         | 630.2994       | 315.6534         | 5  |
| 10 | 1115.5996 | 558.3035        | 1098.5731      | 549.7902         | 1097.5891      | 549.2982         | P    | 492.2089  | 246.6081        | 475.1823       | 238.0948         | 474.1983       | 237.6028         | 4  |
| 11 | 1230.6266 | 615.8169        | 1213.6000      | 607.3037         | 1212.6160      | 606.8116         | D    | 395.1561  | 198.0817        | 378.1296       | 189.5684         | 377.1456       | 189.0764         | 3  |
| 12 | 1344.6695 | 672.8384        | 1327.6430      | 664.3251         | 1326.6589      | 663.8331         | N    | 280.1292  | 140.5682        | 263.1026       | 132.0550         |                |                  | 2  |
| 13 |           |                 |                |                  |                |                  | F    | 166.0863  | 83.5468         |                |                  |                |                  | 1  |

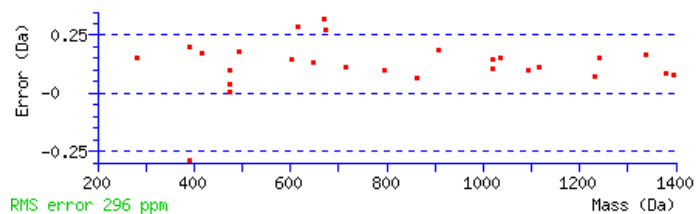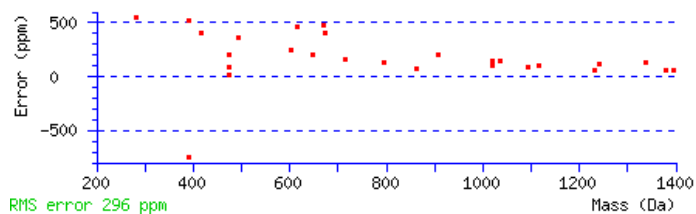

NCBI **BLAST** search of [SGPFGQIFRPDNE](#)

(Parameters: blastp, nr protein database, expect=20000, no filter, PAM30)

Other BLAST [web gateways](#)

#### All matches to this query

| Score | Mr(calc)  | Delta   | Sequence                         |
|-------|-----------|---------|----------------------------------|
| 57.4  | 1508.7412 | 0.0056  | <a href="#">SGPFGQIFRPDNE</a>    |
| 57.4  | 1508.7412 | 0.0056  | <a href="#">SGPFGQLFRPDNE</a>    |
| 21.5  | 1508.7708 | -0.0239 | <a href="#">NNRG TIPGPPMGPGP</a> |
| 20.8  | 1508.7694 | -0.0225 | <a href="#">IVTAGQLSLCSEEQ</a>   |
| 18.1  | 1508.9249 | -0.1781 | <a href="#">PRTTSRPSVPDKP</a>    |
| 18.1  | 1508.6631 | 0.0838  | <a href="#">TASSGYASVQGADEP</a>  |
| 17.7  | 1508.7657 | -0.0188 | <a href="#">TPQHNMGQLLSVY</a>    |
| 17.0  | 1508.8162 | -0.0694 | <a href="#">GRANGMGVIGQDGLL</a>  |
| 16.8  | 1508.7318 | 0.0150  | <a href="#">SSDSSRLVSASDDK</a>   |
| 16.5  | 1508.7475 | -0.0006 | <a href="#">DPWGT VVARCSEGP</a>  |

Mascot: <http://www.matrixscience.com/>

# Mascot Search Results

## Peptide View

MS/MS Fragmentation of **DDEESEAQGPK**  
Found in **TBB3\_MOUSE** in **SwissProt**, Tubulin beta-3 chain OS=Mus musculus GN=Tubb3 PE=1 SV=1

Match to Query 3515: 1259.557768 from(630.786160,2+) intensity(12710.6270) scans(2116) rawscans(sn2116) rtinseconds(1035.1652) index(502)  
Title: 503: Scan 2116 (rt=1035.17) [C:\Users\Administrador\Desktop\AMOSTRAS NO ORBITRAP LEANDRO RODAR NOVAMENTE\HIPOCAMPO\hipocampo\_01.raw]  
Data file hipocampo\_01.temp.mgf

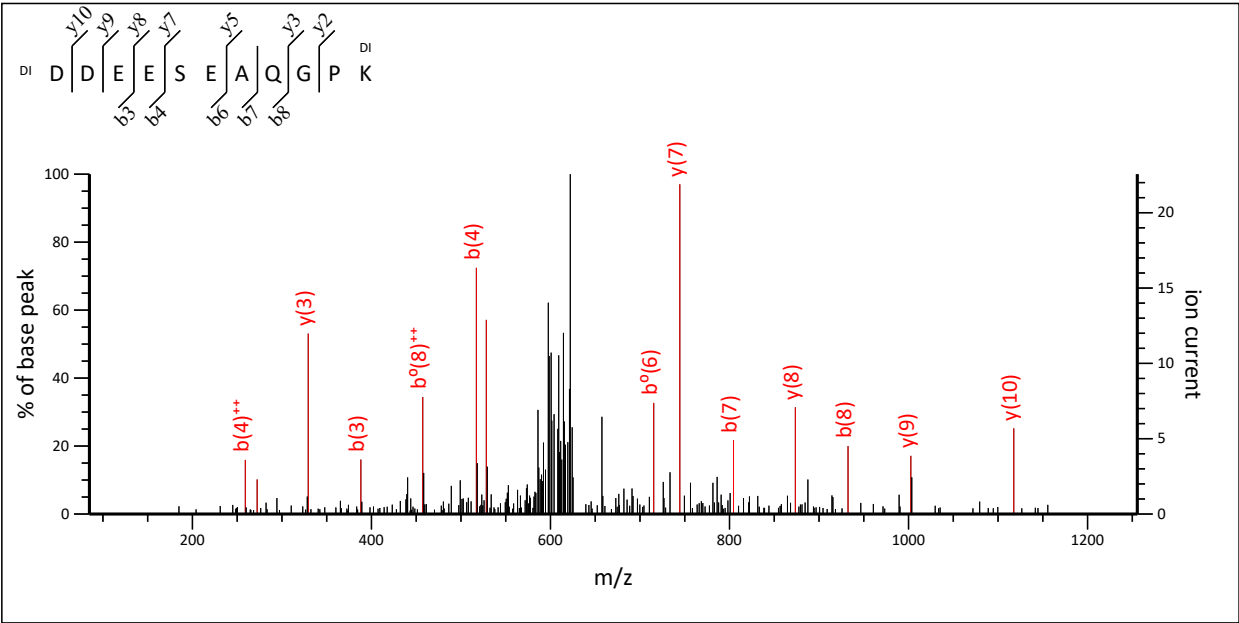

Navigation icons: ? (help), image (download), left arrow, zoom in, zoom out, zoom reset, 84.93 to 1255.58 (mass range), zoom in, right arrow.

Label all possible matches ☐ Label matches used for scoring ☒

Monoisotopic mass of neutral peptide Mr(calc): 1259.5517  
Variable modifications:  
N-term : Dimethyl (N-term)  
K11 : Dimethyl (K)  
Ions Score: 64 Expect: 0.011  
Matches : 17/96 fragment ions using 20 most intense peaks ([help](#))

| #  | b         | b <sup>++</sup> | b <sup>*</sup> | b <sup>+++</sup> | b <sup>0</sup> | b <sup>0++</sup> | Seq. | y         | y <sup>++</sup> | y <sup>*</sup> | y <sup>+++</sup> | y <sup>0</sup> | y <sup>0++</sup> | #  |
|----|-----------|-----------------|----------------|------------------|----------------|------------------|------|-----------|-----------------|----------------|------------------|----------------|------------------|----|
| 1  | 144.0655  | 72.5364         |                |                  | 126.0550       | 63.5311          | D    |           |                 |                |                  |                |                  | 11 |
| 2  | 259.0925  | 130.0499        |                |                  | 241.0819       | 121.0446         | D    | 1117.5008 | 559.2540        | 1100.4742      | 550.7408         | 1099.4902      | 550.2487         | 10 |
| 3  | 388.1351  | 194.5712        |                |                  | 370.1245       | 185.5659         | E    | 1002.4738 | 501.7406        | 985.4473       | 493.2273         | 984.4633       | 492.7353         | 9  |
| 4  | 517.1776  | 259.0925        |                |                  | 499.1671       | 250.0872         | E    | 873.4312  | 437.2193        | 856.4047       | 428.7060         | 855.4207       | 428.2140         | 8  |
| 5  | 604.2097  | 302.6085        |                |                  | 586.1991       | 293.6032         | S    | 744.3886  | 372.6980        | 727.3621       | 364.1847         | 726.3781       | 363.6927         | 7  |
| 6  | 733.2523  | 367.1298        |                |                  | 715.2417       | 358.1245         | E    | 657.3566  | 329.1819        | 640.3301       | 320.6687         | 639.3461       | 320.1767         | 6  |
| 7  | 804.2894  | 402.6483        |                |                  | 786.2788       | 393.6430         | A    | 528.3140  | 264.6607        | 511.2875       | 256.1474         |                |                  | 5  |
| 8  | 932.3480  | 466.6776        | 915.3214       | 458.1643         | 914.3374       | 457.6723         | Q    | 457.2769  | 229.1421        | 440.2504       | 220.6288         |                |                  | 4  |
| 9  | 989.3694  | 495.1884        | 972.3429       | 486.6751         | 971.3589       | 486.1831         | G    | 329.2183  | 165.1128        | 312.1918       | 156.5995         |                |                  | 3  |
| 10 | 1086.4222 | 543.7147        | 1069.3956      | 535.2015         | 1068.4116      | 534.7095         | P    | 272.1969  | 136.6021        | 255.1703       | 128.0888         |                |                  | 2  |
| 11 |           |                 |                |                  |                |                  | K    | 175.1441  | 88.0757         | 158.1176       | 79.5624          |                |                  | 1  |

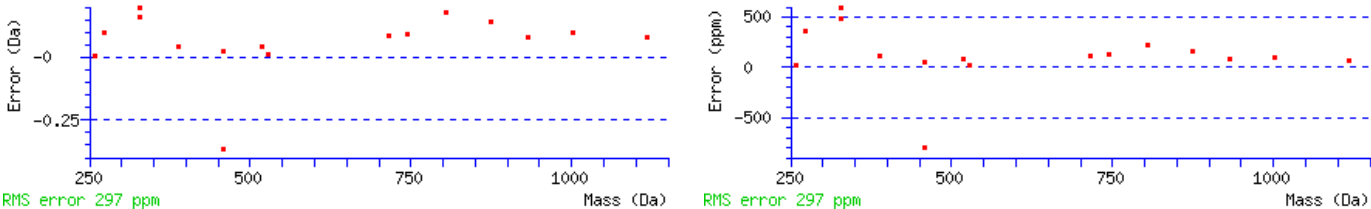

NCBI **BLAST** search of [DDEESEAQGPK](#)

(Parameters: blastp, nr protein database, expect=20000, no filter, PAM30)

Other BLAST [web gateways](#)

**All matches to this query**

| Score | Mr(calc)  | Delta   | Sequence                      |
|-------|-----------|---------|-------------------------------|
| 64.3  | 1259.5517 | 0.0060  | <a href="#">DDEESEAQGPK</a>   |
| 37.5  | 1259.6183 | -0.0605 | <a href="#">SPEESTVQVPN</a>   |
| 26.3  | 1259.7296 | -0.1718 | <a href="#">QKAGASEEQALG</a>  |
| 25.7  | 1259.6795 | -0.1218 | <a href="#">LVSEALCSTKGP</a>  |
| 25.3  | 1259.5266 | 0.0312  | <a href="#">EGGGQAEEQAAEG</a> |
| 24.0  | 1259.5340 | 0.0238  | <a href="#">DDEEESHKCL</a>    |
| 23.8  | 1259.6357 | -0.0780 | <a href="#">DDEEEQKRK</a>     |
| 21.5  | 1259.6544 | -0.0966 | <a href="#">DNAMGKAVITAN</a>  |
| 21.5  | 1259.5266 | 0.0312  | <a href="#">DDEESVDGNRP</a>   |
| 21.3  | 1259.5380 | 0.0198  | <a href="#">DDEEMKEQE</a>     |

Mascot: <http://www.matrixscience.com/>



## Diagram of Dimethyl labeling

| Samples       |   | Isotopic Labeling                         |                                           | Liquid chromatography<br>and mass spectrometry |
|---------------|---|-------------------------------------------|-------------------------------------------|------------------------------------------------|
|               |   | H <sub>2</sub> CO<br>NaBH <sub>3</sub> CN | D <sub>2</sub> CO<br>NaBH <sub>3</sub> CN |                                                |
| Cortex 1      | = | WT1                                       | + KO1                                     | LC/MS cortex run1                              |
| Cortex 2      | = | WT2                                       | + KO2                                     | LC/MS cortex run2                              |
| Cortex 3      | = | KO3                                       | + WT3                                     | LC/MS cortex run3                              |
| Hippocampus 1 | = | WT1                                       | + KO1                                     | LC/MS hippocampus run1                         |
| Hippocampus 2 | = | KO2                                       | + WT2                                     | LC/MS hippocampus run2                         |
| Hippocampus 3 | = | KO3                                       | + WT3                                     | LC/MS hippocampus run3                         |
| Striatum 1    | = | WT1                                       | + KO1                                     | LC/MS striatum run1                            |
| Striatum 2    | = | KO2                                       | + WT2                                     | LC/MS striatum run2                            |
| Striatum 3    | = | KO3                                       | + WT3                                     | LC/MS striatum run3                            |

**Dimethyl Isotopic labeling scheme used for relative quantification of peptides extracts from prefrontal cortex, striatum and hippocampus of THOP1<sup>-/-</sup> mice and C57BL/69 wild type mice.** For isotopic labeling with Formaldehyde tags were used two isotopic forms (H<sub>2</sub>CO and D<sub>2</sub>CO) plus NaBH<sub>3</sub>CN and the final product of these reactions adds 28 or 32 Da to the final mass of peptides at each available (lysine or N-terminal) labeling site. Peptides extracted from each brain area (KO and WT samples) were labeled and pooled as indicated in three different runs. In some runs the labeling scheme was reverse.

# RPTLNELGISTPEELGLDKV 3+

cortex\_01 #10219-10410 RT: 64,16-65,14 AV: 9 NL: 9,58E4  
T: FTMS + p NSI Full ms [200,00-2000,00]

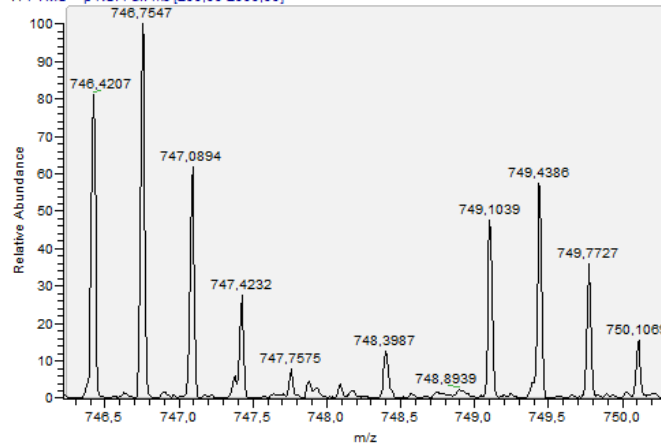

cortex\_03 #12884-13159 RT: 65,94-67,03 AV: 40 NL: 9,40E4  
T: FTMS + p NSI Full ms [200,00-2000,00]

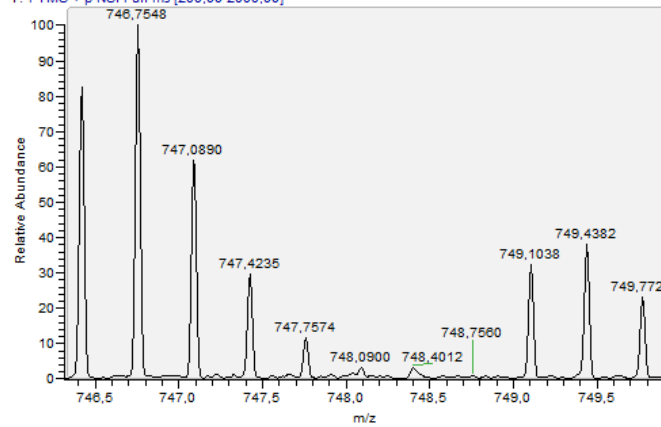

cortex\_04 #12425-12595 RT: 65,56-66,27 AV: 31 NL: 1,90E4  
T: FTMS + p NSI Full ms [200,00-2000,00]

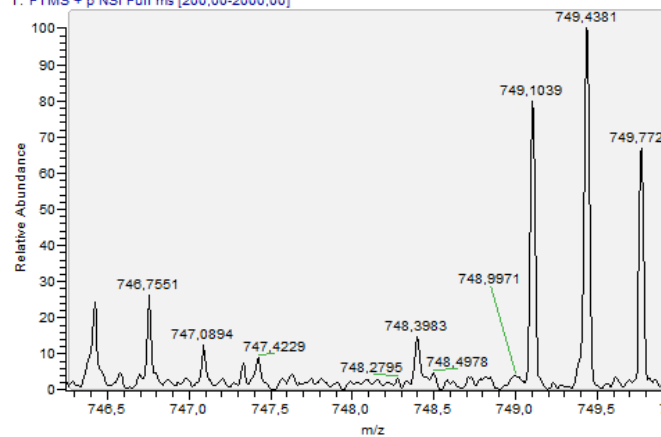

# SGQAAARPLVATV 2+

cortex\_01 #4858-5248 RT: 32,64-34,73 AV: 21 NL: 2,54E5  
T: FTMS + p NSI Full ms [200,00-2000,00]

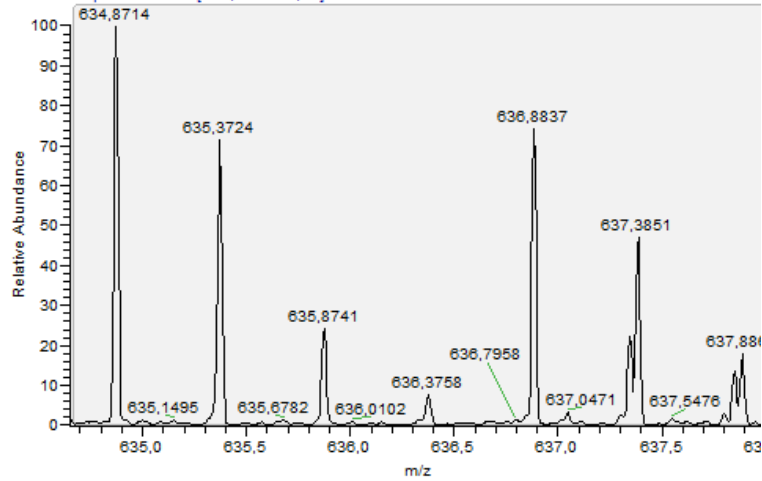

cortex\_03 #6506-6691 RT: 40,37-41,11 AV: 33 NL: 7,10E4  
T: FTMS + p NSI Full ms [200,00-2000,00]

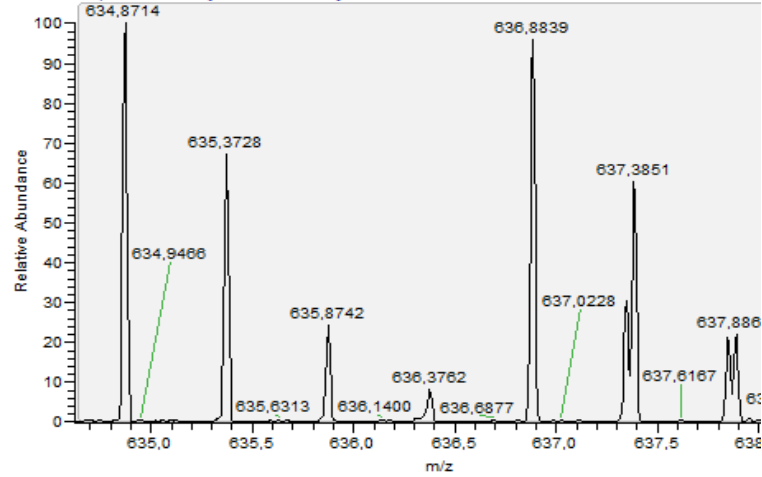

cortex\_04 #6258-6599 RT: 38,89-40,37 AV: 94 NL: 6,39E4  
T: FTMS + p NSI Full ms [200,00-2000,00]

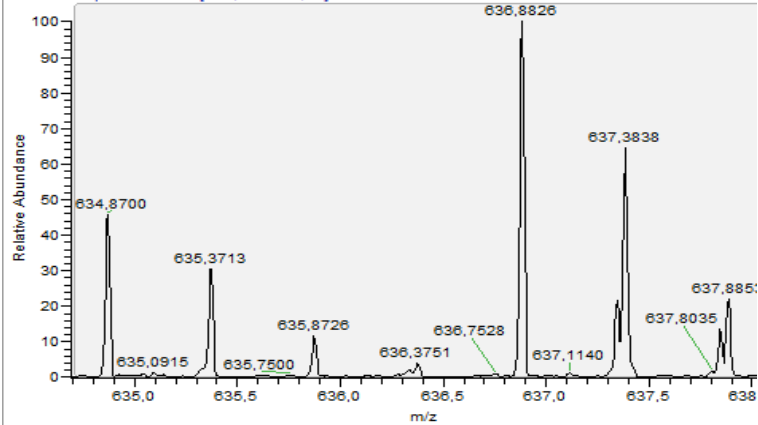

# GLNVPSVRF 2+

cortex\_01 #8022-8210 RT: 51,12-52,20 AV: 16 NL: 5,04E5  
T: FTMS + p NSI Full ms [200,00-2000,00]

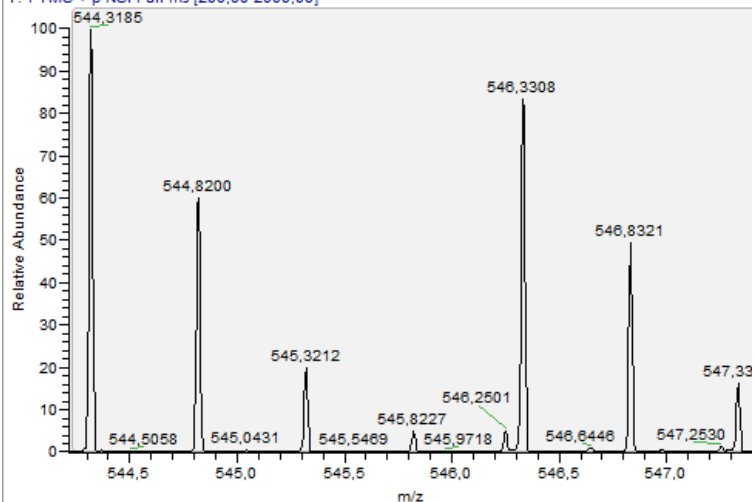

cortex\_03 #10482-11136 RT: 56,31-58,89 AV: 100 NL: 6,23E4  
T: FTMS + p NSI Full ms [200,00-2000,00]

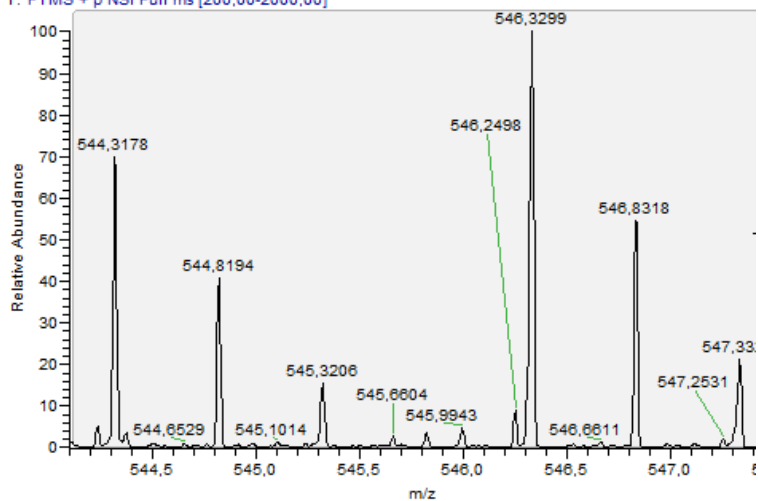

cortex\_04 #10370-10624 RT: 56,67-57,76 AV: 60 NL: 1,26E5  
T: FTMS + p NSI Full ms [200,00-2000,00]

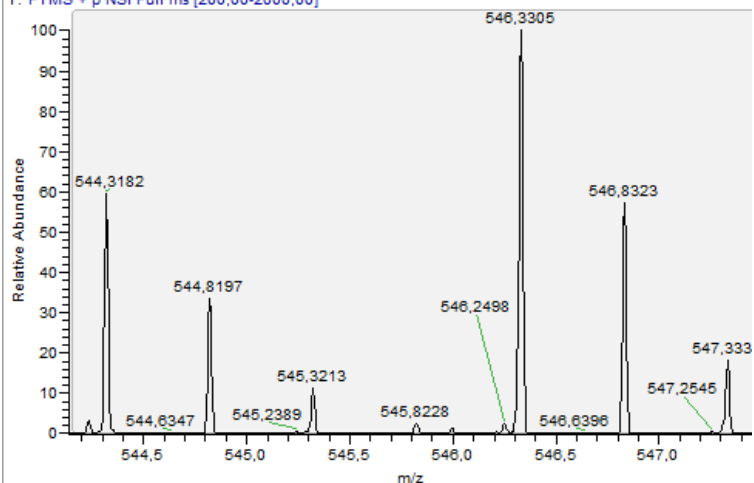

# TVGLNVPASVRF 2+

cortex\_01 #9271-9526 RT: 58,53-59,94 AV: 15 NL: 5,71E4  
T: FTMS + p NSI Full ms [200,00-2000,00]

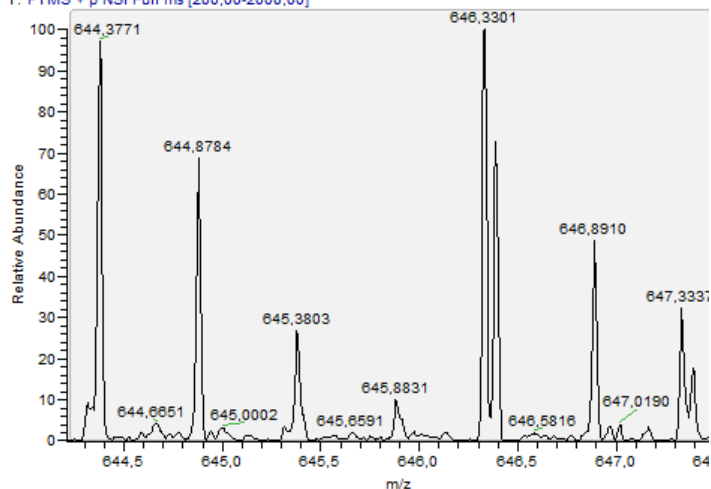

cortex\_03 #11693-11971 RT: 61,11-62,20 AV: 44 NL: 1,57E4  
T: FTMS + p NSI Full ms [200,00-2000,00]

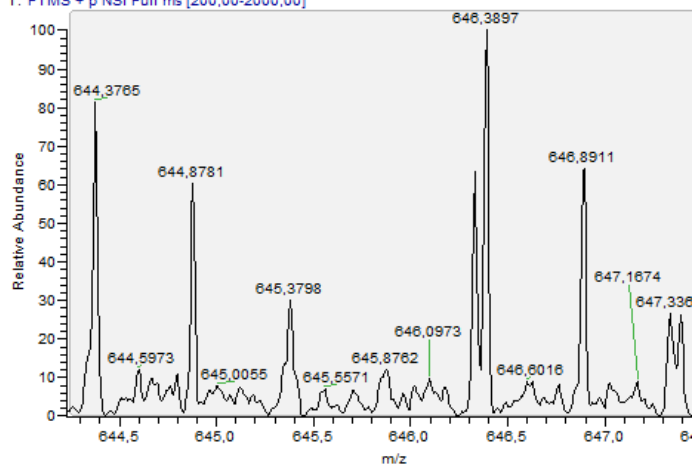

cortex\_04 #11210-11461 RT: 60,38-61,48 AV: 61 NL: 1,84E4  
T: FTMS + p NSI Full ms [200,00-2000,00]

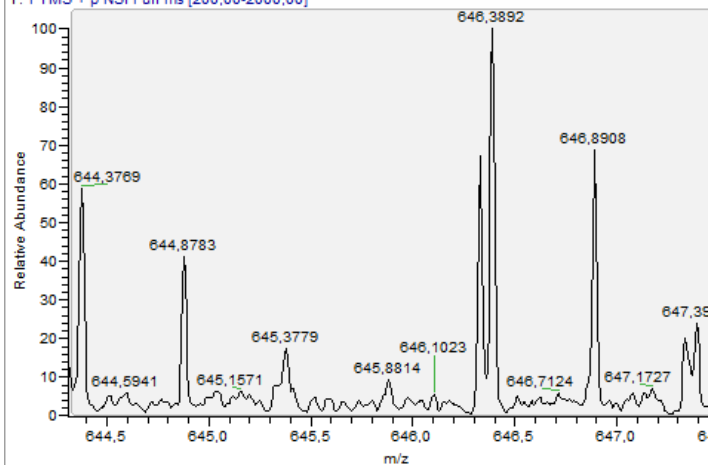

# ARSGPFAPVLSAT 2+

cortex\_01 #7346-7533 RT: 47,13-48,11 AV: 11 NL: 5,39E4  
T: FTMS + p NSI Full ms [200,00-2000,00]

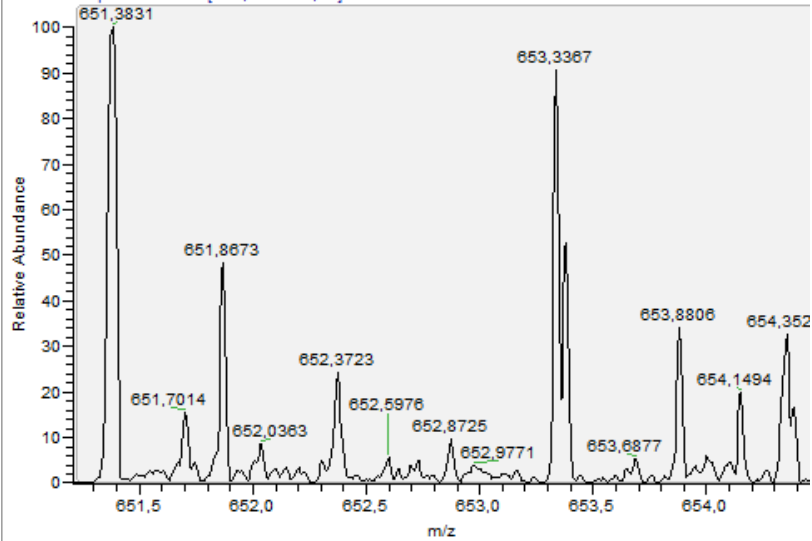

cortex\_03 #9824-10014 RT: 53,73-54,43 AV: 30 NL: 1,43E4  
T: FTMS + p NSI Full ms [200,00-2000,00]

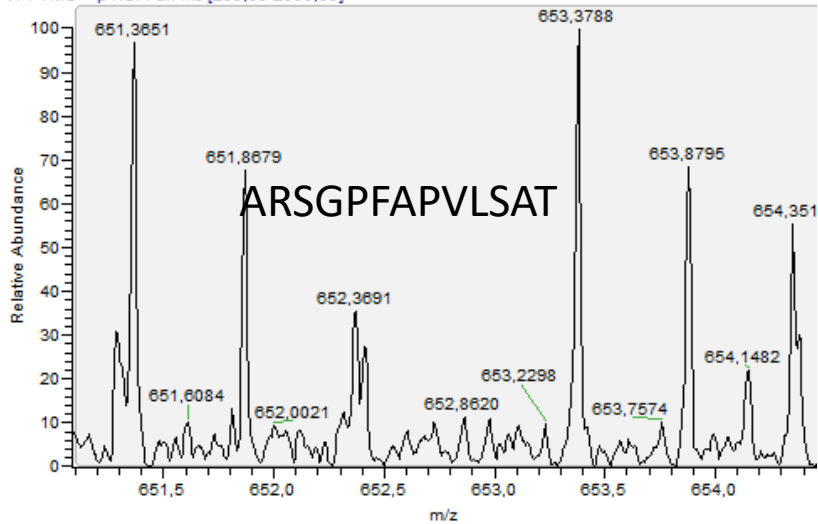

cortex\_04 #9558-9617 RT: 53,18-53,41 AV: 13 NL: 1,83E4  
T: FTMS + p NSI Full ms [200,00-2000,00]

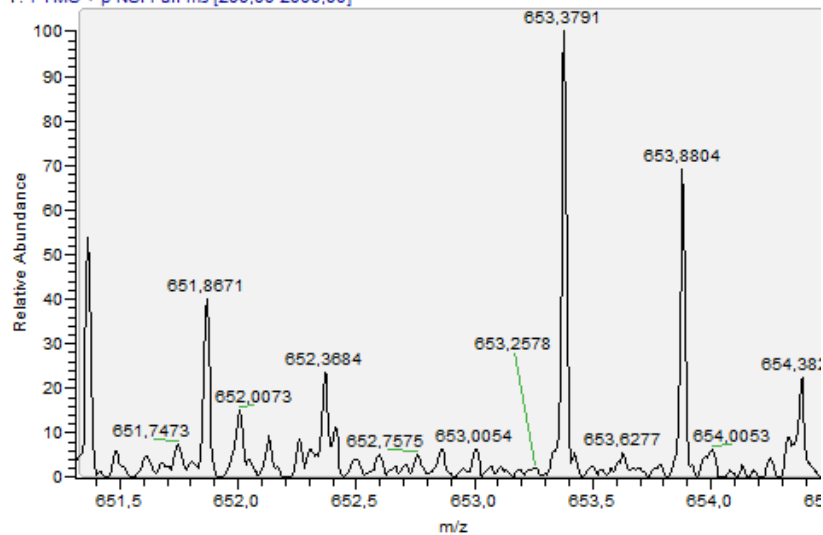

# ATVGDVNTDRPGLLDL 2+

cortex\_01 #9678 RT: 60.89 AV: 1 NL: 3,29E4

T: FTMS + p NSI Full ms [200,00-2000,00]

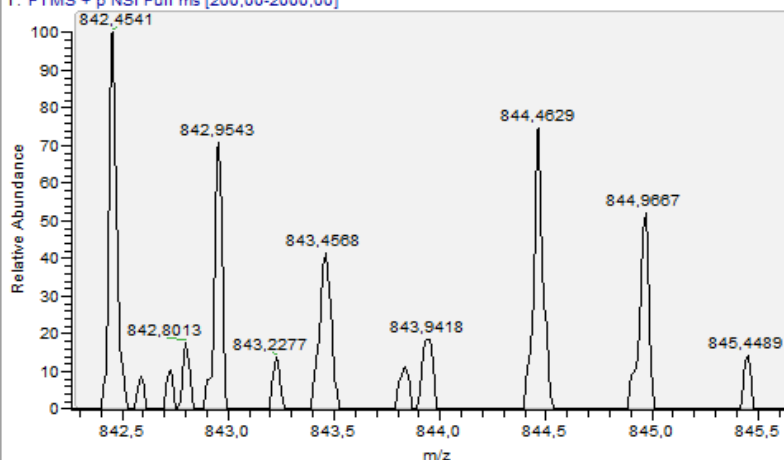

cortex\_03 #12160-12337 RT: 62.99-63.69 AV: 28 NL: 6,06E3

T: FTMS + p NSI Full ms [200,00-2000,00]

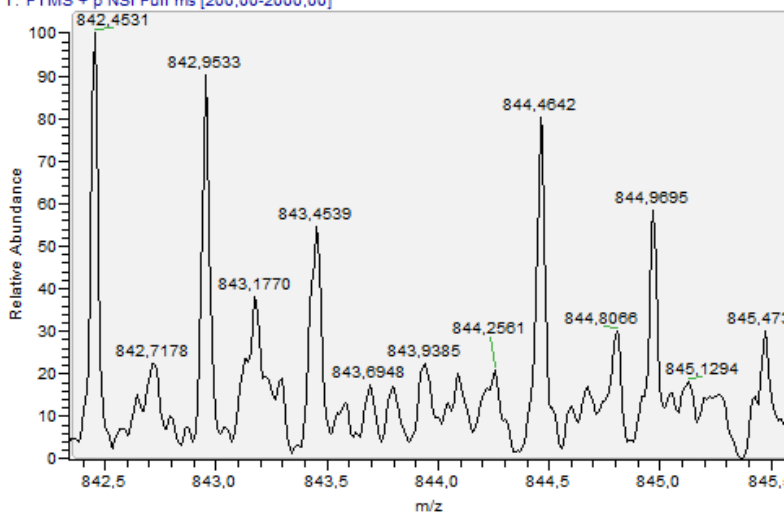

cortex\_04 #11808-12155 RT: 62.96-64.44 AV: 73 NL: 3,21E3

T: FTMS + p NSI Full ms [200,00-2000,00]

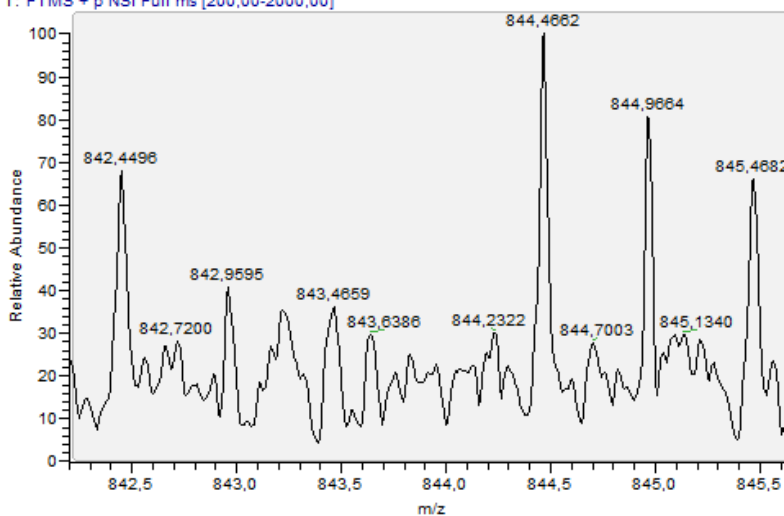

# VEKVDELKKKYGI 2+

cortex\_01 #6052-5183 RT: 33,71-34,44 AV: 8 NL: 6,33E4  
T: FTMS + p NSI Full ms [200,00-2000,00]

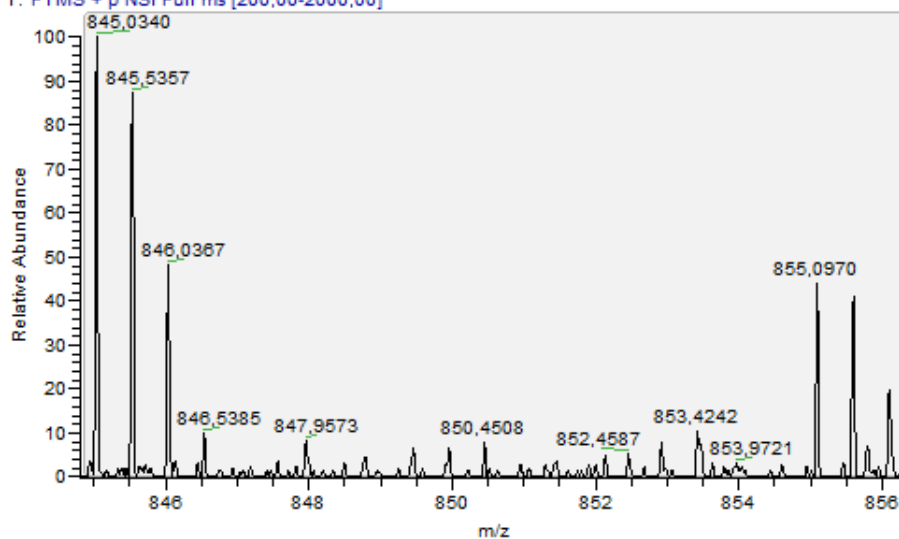

cortex\_04 #6683 RT: 40,75 AV: 1 NL: 1,48E3  
T: FTMS + p NSI Full ms [200,00-2000,00]

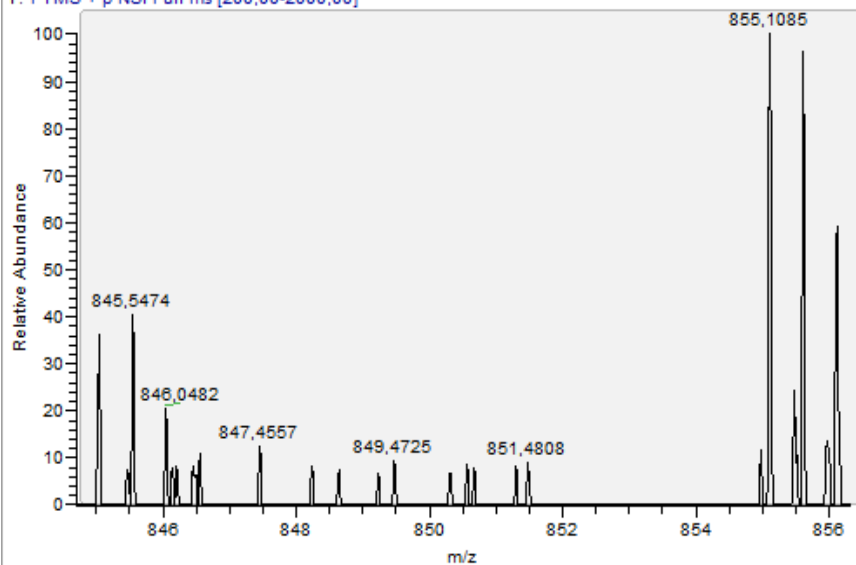



# VEKVDLKKKYGI 3+

cortex\_01 #5052-5183 RT: 33,71-34,44 AV: 8 NL: 3,16E5

T: FTMS + p NSI Full ms [200,00-2000,00]

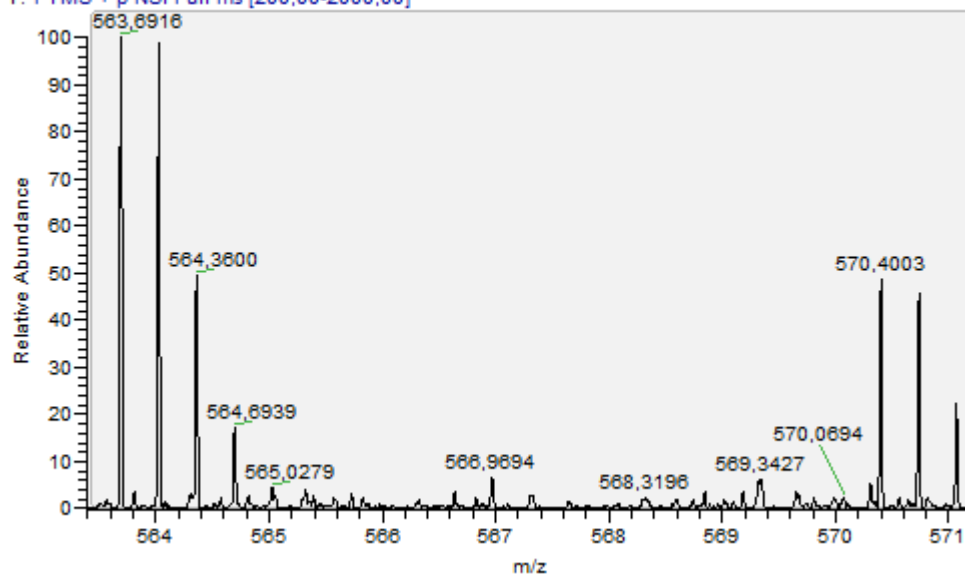

cortex\_04 #6599-6943 RT: 40,37-41,84 AV: 79 NL: 3,62E4

T: FTMS + p NSI Full ms [200,00-2000,00]

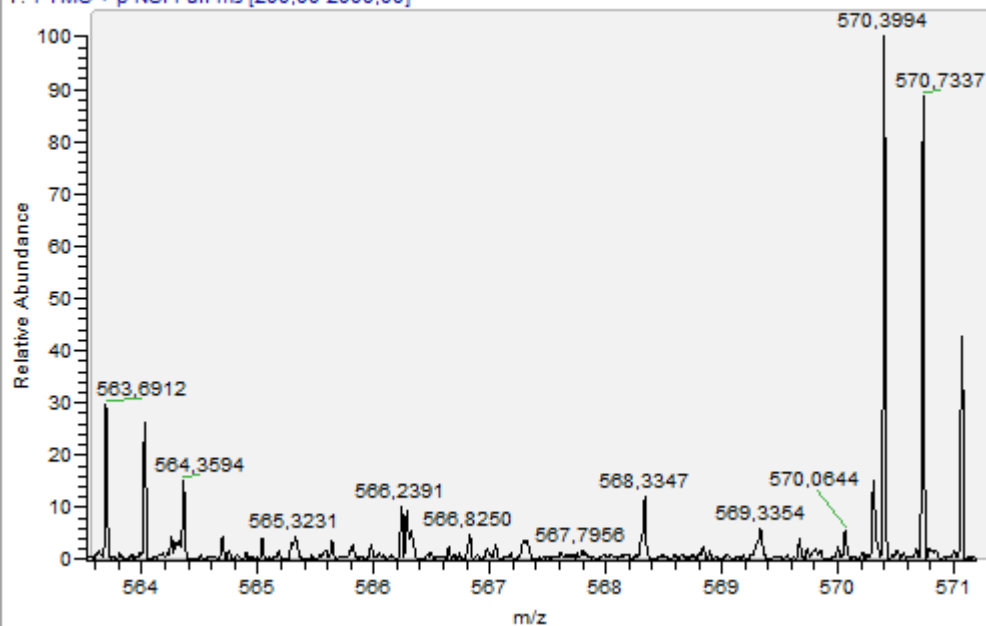

# ASKGLGSDLDSSLASL 2+

cortex\_01 #9852-9778 RT: 60,77-61,39 AV: 8 NL: 9,45E4

T: FTMS + p NSI Full ms [200,00-2000,00]

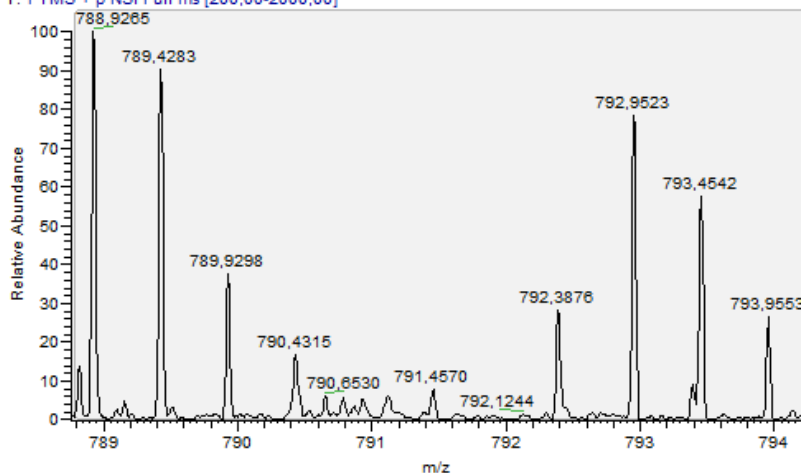

cortex\_03 #12180-12521 RT: 62,99-64,43 AV: 56 NL: 8,99E4

T: FTMS + p NSI Full ms [200,00-2000,00]

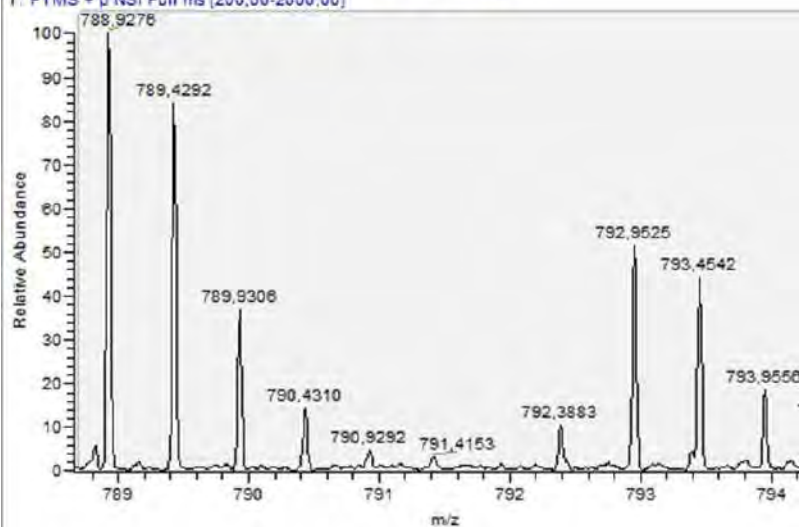

cortex\_04 #11808-12155 RT: 62,96-64,44 AV: 73 NL: 5,50E4

T: FTMS + p NSI Full ms [200,00-2000,00]

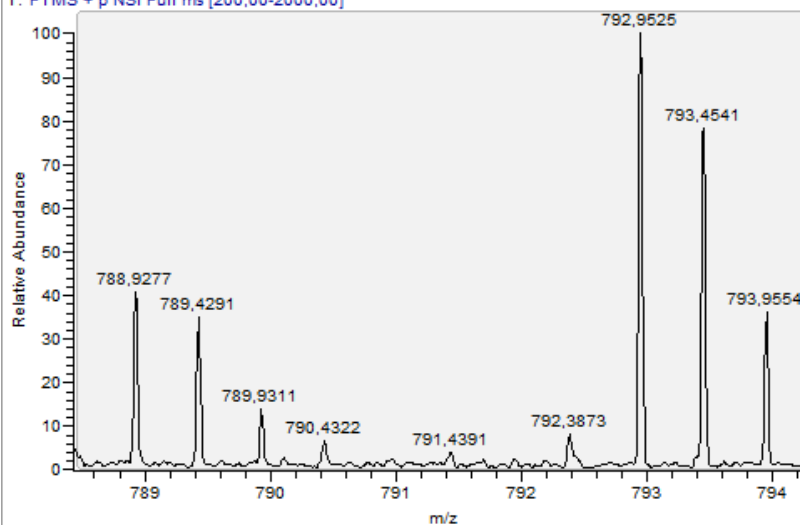

# SKGLGSDLDSSLASL 2+

cortex\_01 #9589-9716 RT: 60.43-61.01 AV: 6 NL: 1,92E5  
T: FTMS + p NSI Full ms [200.00-2000.00]

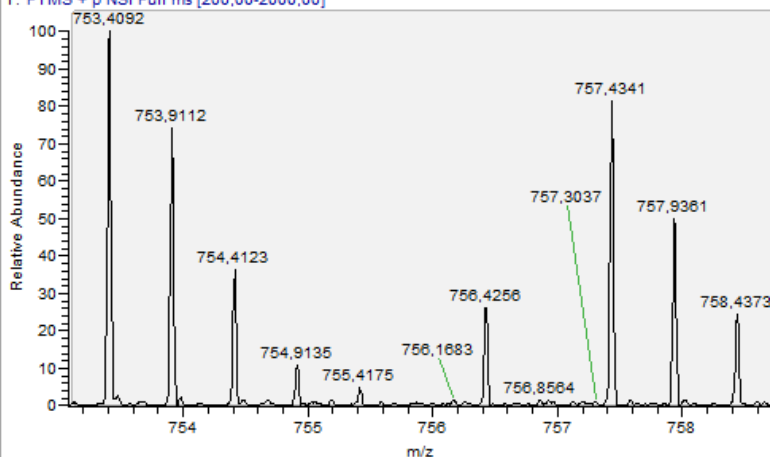

cortex\_03 #12160-12521 RT: 62.99-64.43 AV: 56 NL: 1,11E5  
T: FTMS + p NSI Full ms [200.00-2000.00]

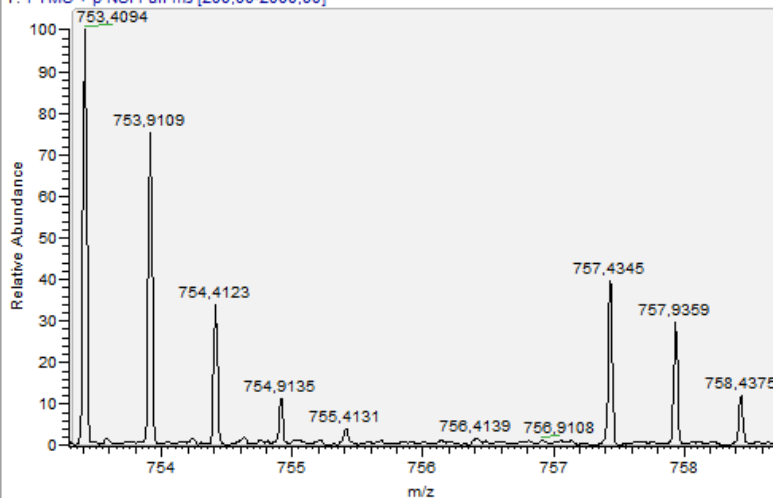

cortex\_04 #11979-12244 RT: 63.70-64.82 AV: 50 NL: 3,01E4  
T: FTMS + p NSI Full ms [200.00-2000.00]

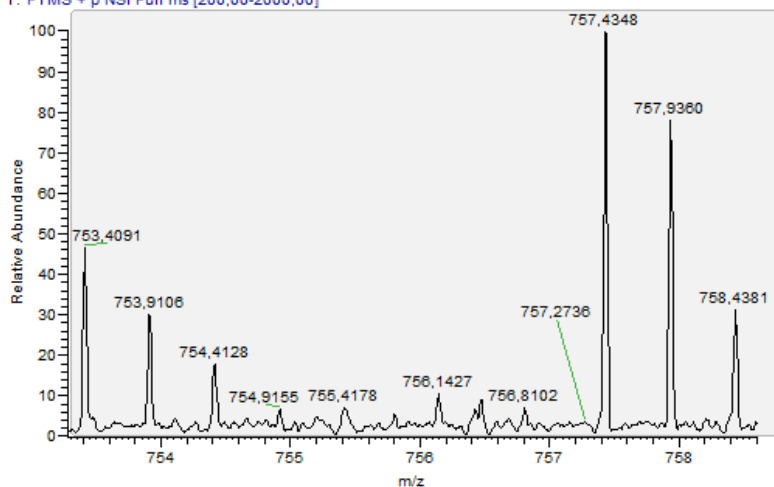

# SPSPTPATQSPKKPPAKDPLADLNKDFL 4+

cortex\_01 #10344-10537 RT: 64.91-65.83 AV: 9 NL: 8,01E5  
T: FTMS + p NSI Full ms [200,00-2000,00]

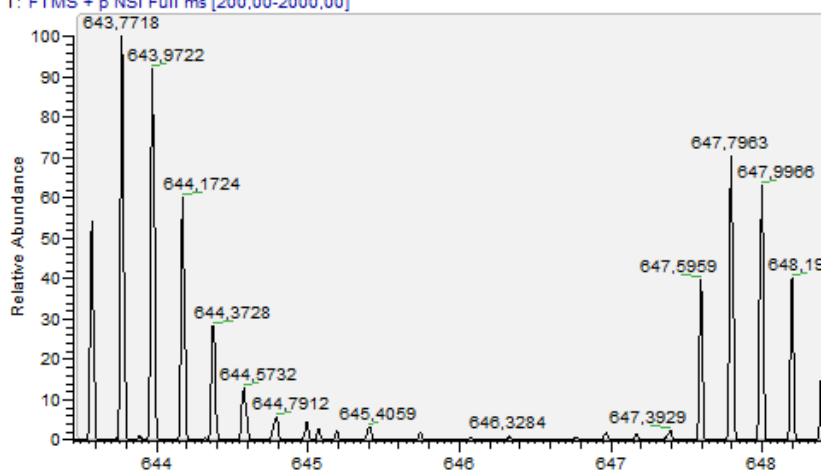

cortex\_03 #13500-13858 RT: 68.52-70.00 AV: 55 NL: 3,83E5  
T: FTMS + p NSI Full ms [200,00-2000,00]

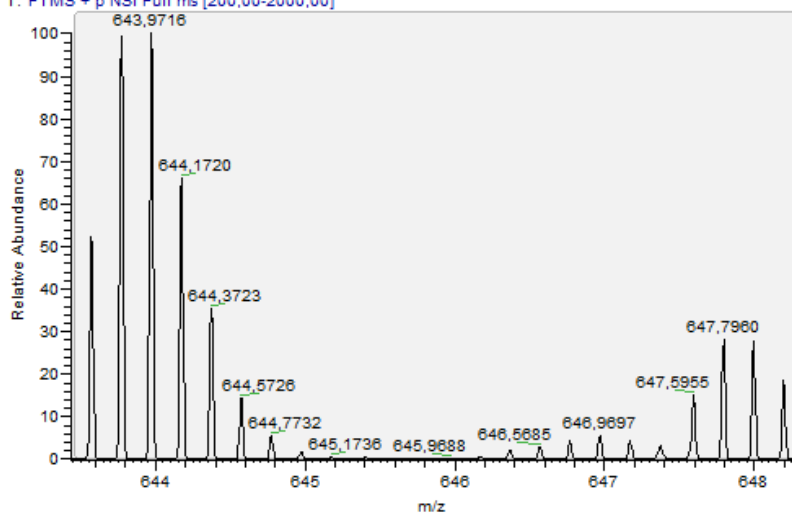

cortex\_04 #12674-13019 RT: 66.67-68.13 AV: 65 NL: 5,79E5  
T: FTMS + p NSI Full ms [200,00-2000,00]

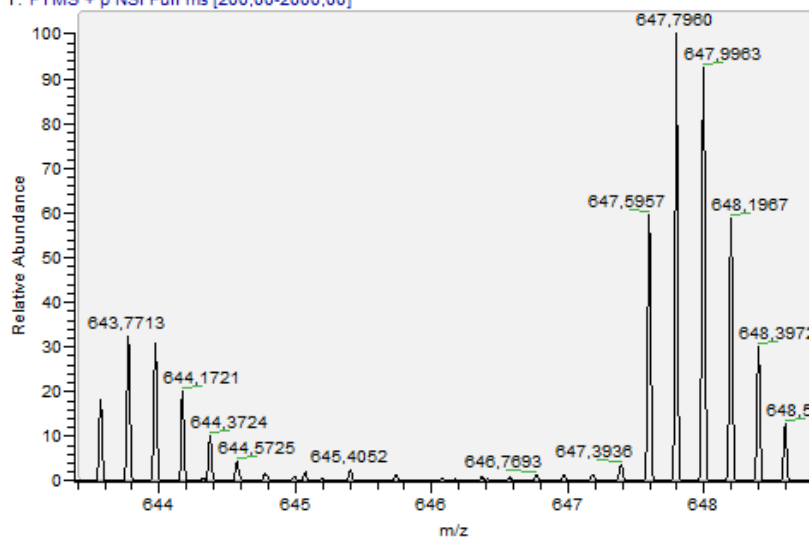

# KGLGSDLDSSLASL 2+

cortex\_01 #9399-9716 RT: 59.27-61.01 AV: 17 NL: 6,79E4

T: FTMS + p NSI Full ms [200,00-2000,00]

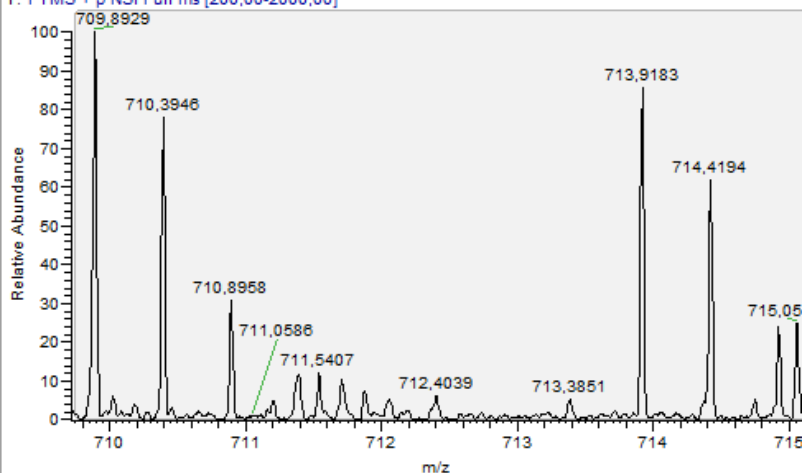

cortex\_03 #12160-12337 RT: 62.99-63.69 AV: 28 NL: 2,13E4

T: FTMS + p NSI Full ms [200,00-2000,00]

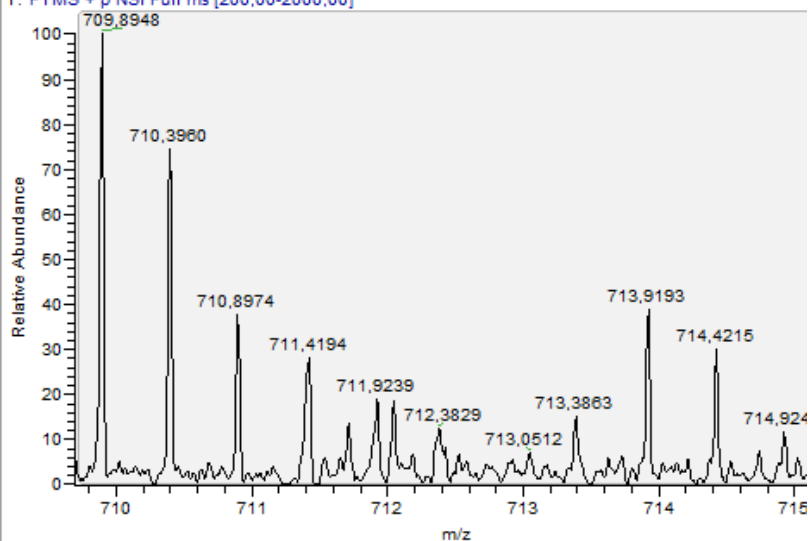

cortex\_04 #11550-11894 RT: 61.85-63.33 AV: 73 NL: 4,62E4

T: FTMS + p NSI Full ms [200,00-2000,00]

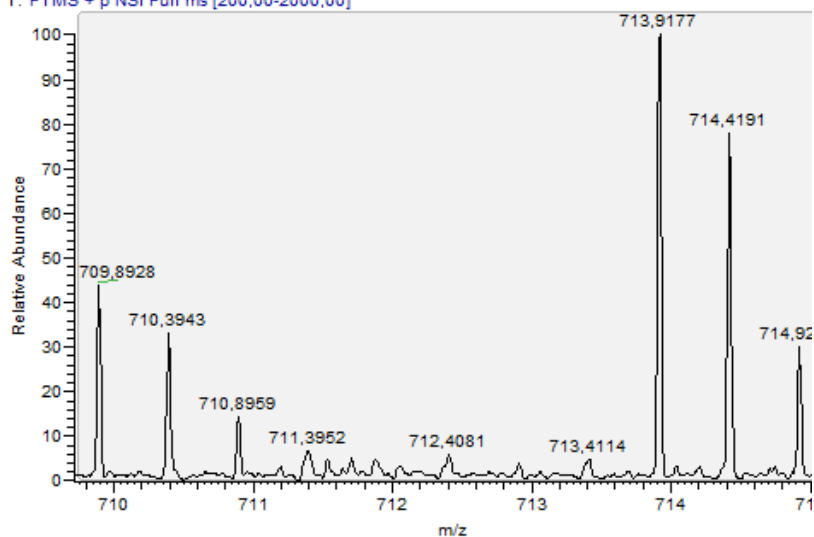

# TQVVSDAAYKGVQPHVV 3+

cortex\_01 #5648-5838 RT: 37,11-38,03 AV: 11 NL: 6,88E4  
T: FTMS + p NSI Full ms [200,00-2000,00]

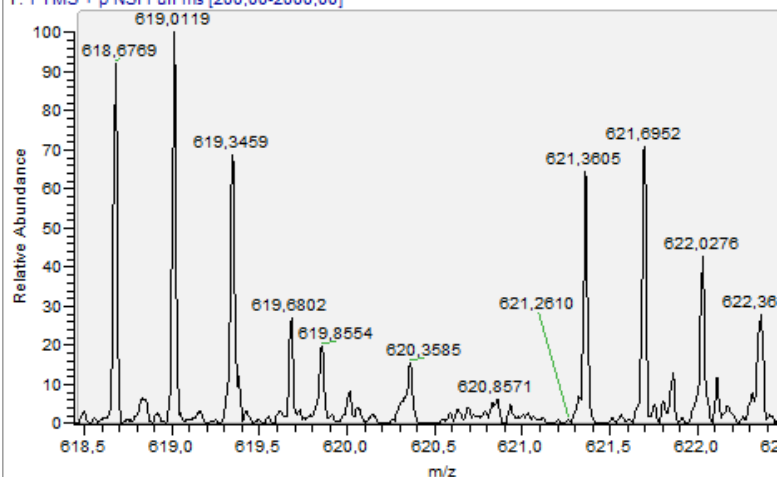

cortex\_03 #7340-7522 RT: 43,72-44,44 AV: 35 NL: 3,13E4  
T: FTMS + p NSI Full ms [200,00-2000,00]

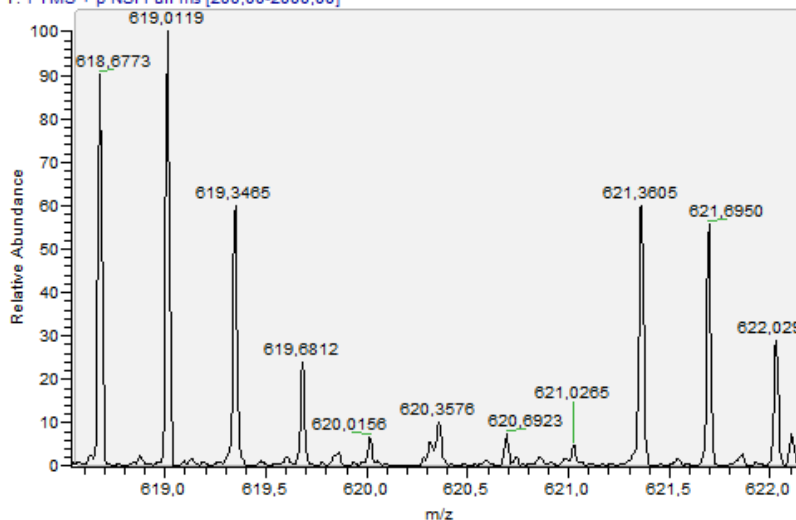

cortex\_04 #7203-7459 RT: 42,98-44,06 AV: 57 NL: 1,90E4  
T: FTMS + p NSI Full ms [200,00-2000,00]

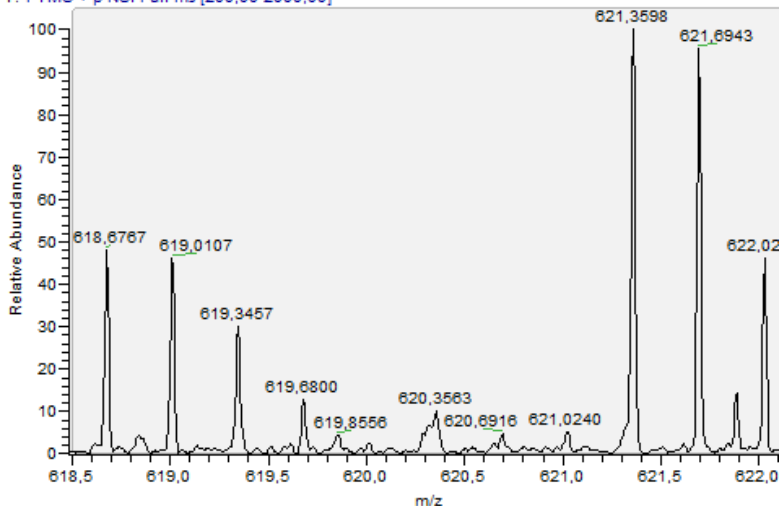

# GRKGPGGGPGGAGGARGGAGGGPSGD 3+

cortex\_01 #1881-2115 RT: 15,92-17,31 AV: 13 NL: 5,16E4  
T: FTMS + p NSI Full ms [200,00-2000,00]

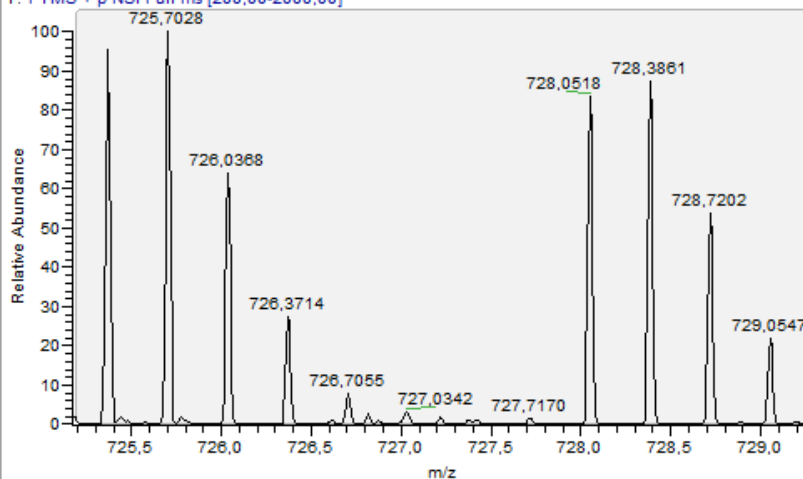

cortex\_03 #2379-2599 RT: 22,59-23,70 AV: 83 NL: 7,27E3  
T: FTMS + p NSI Full ms [200,00-2000,00]

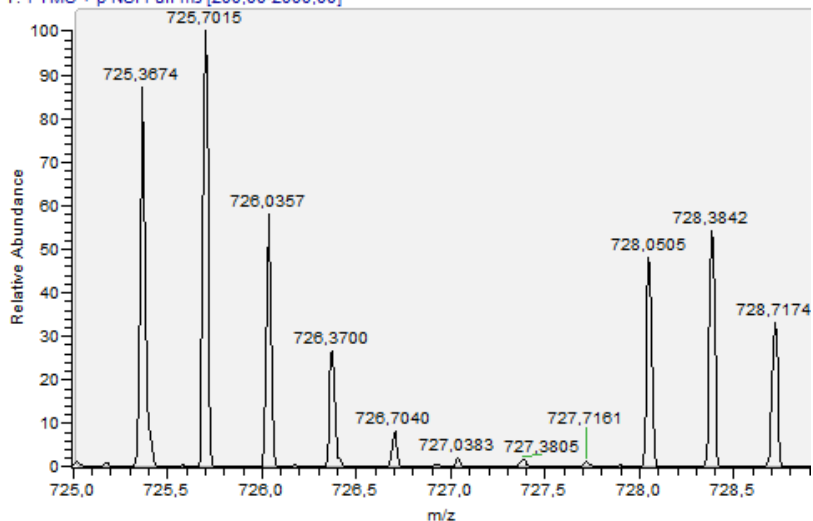

cortex\_04 #1806-2250 RT: 19,63-21,85 AV: 152 NL: 4,13E3  
T: FTMS + p NSI Full ms [200,00-2000,00]

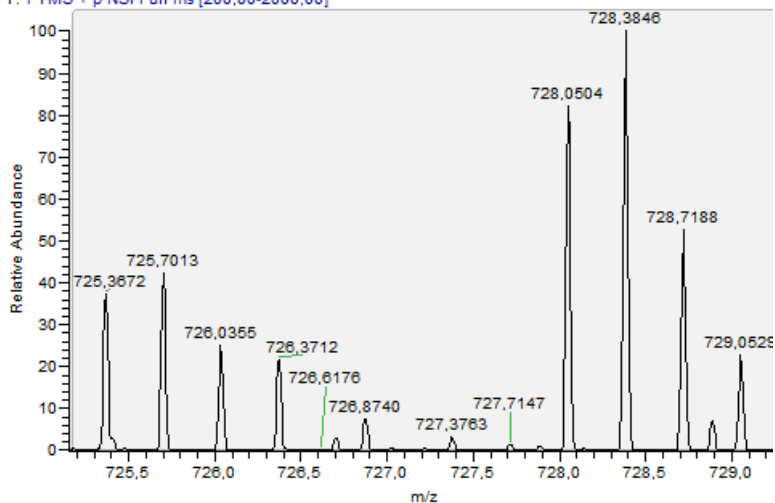

# AQATGKPAQYIAVHVVPDQL 3+

cortex\_01 #8522-8649 RT: 54,10-54,77 AV: 10 NL: 3,29E5

T: FTMS + p NSI Full ms [200,00-2000,00]

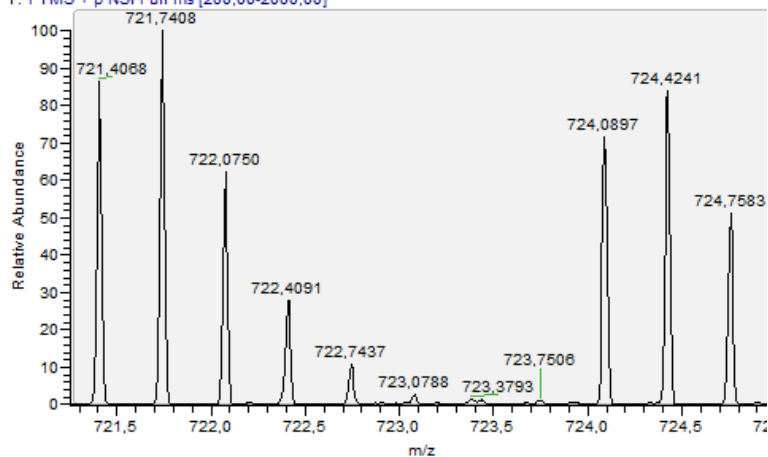

cortex\_03 #10571-10853 RT: 56,67-57,78 AV: 43 NL: 3,38E4

T: FTMS + p NSI Full ms [200,00-2000,00]

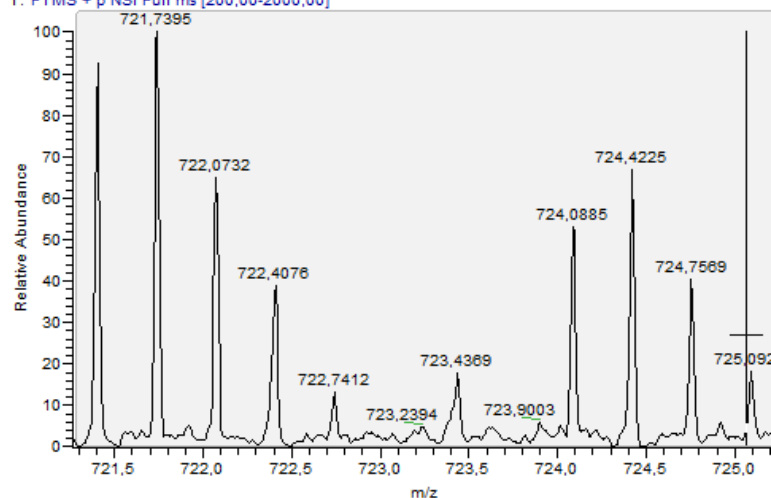

cortex\_04 #10203-10539 RT: 55,93-57,40 AV: 80 NL: 3,65E4

T: FTMS + p NSI Full ms [200,00-2000,00]

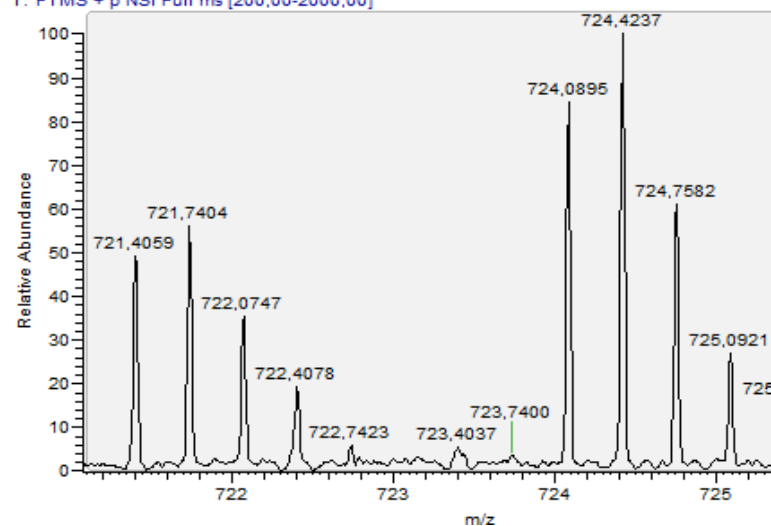



# AQATGKPAQYIAVHVVPDQL 2+

cortex\_01 #8522-8649 RT: 54,10-54,77 AV: 10 NL: 2,18E4  
T: FTMS + p NSI Full ms [200,00-2000,00]

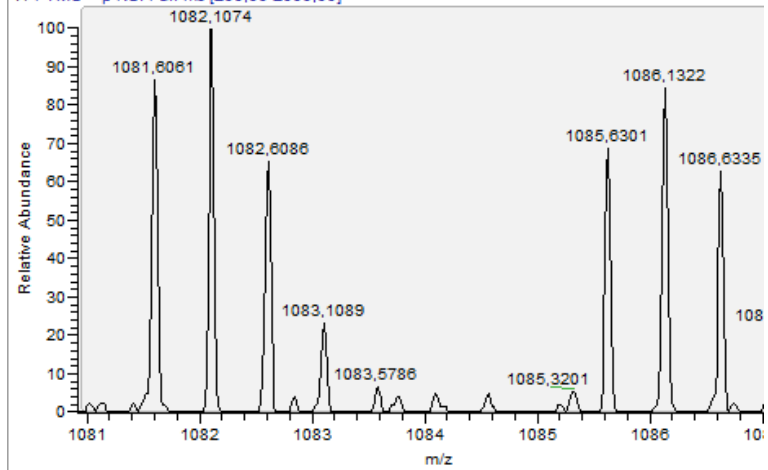

cortex\_03 #10571-11042 RT: 56,67-58,52 AV: 70 NL: 2,18E3  
T: FTMS + p NSI Full ms [200,00-2000,00]

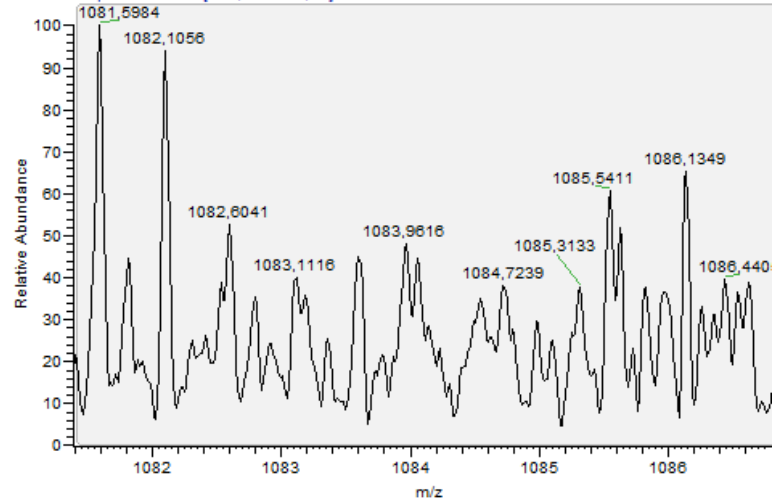

cortex\_04 #10203-10539 RT: 55,93-57,40 AV: 80 NL: 2,50E3  
T: FTMS + p NSI Full ms [200,00-2000,00]

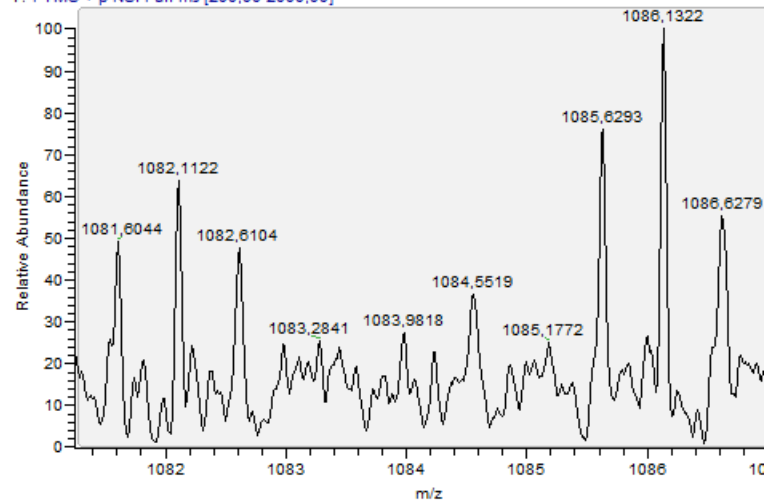

# AQATGKPAQYIA 2+

cortex\_01 #3670 RT: 26.20 AV: 1 NL: 2,19E5  
T: FTMS + p NSI Full ms [200,00-2000,00]

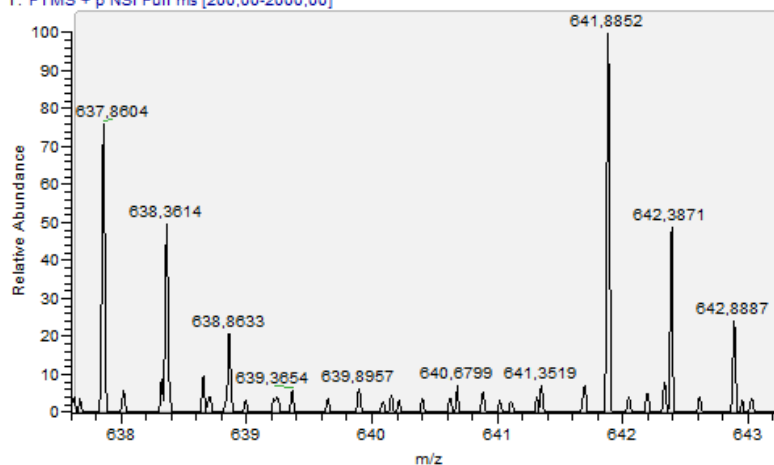

cortex\_03 #4811-5076 RT: 33.34-34.43 AV: 59 NL: 4,23E3  
T: FTMS + p NSI Full ms [200,00-2000,00]

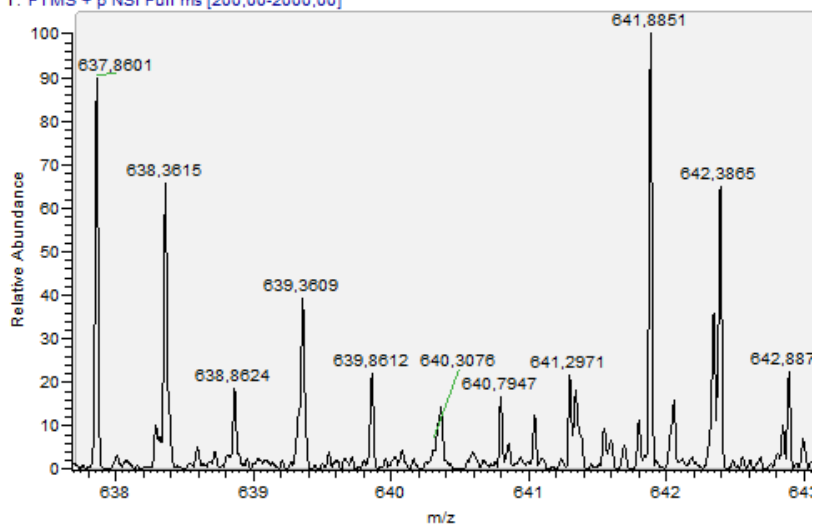

cortex\_04 #4718-4894 RT: 32.23-32.94 AV: 45 NL: 9,63E3  
T: FTMS + p NSI Full ms [200,00-2000,00]

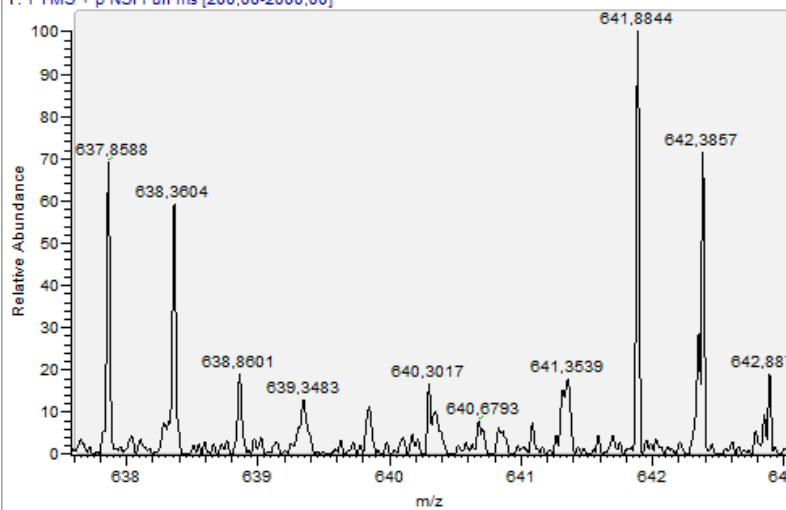

# EDENFILKHTGPGILSM 2+

cortex\_01 #10094-10282 RT: 63.36-64.41 AV: 10 NL: 1,54E4

T: FTMS + p NSI Full ms [200.00-2000.00]

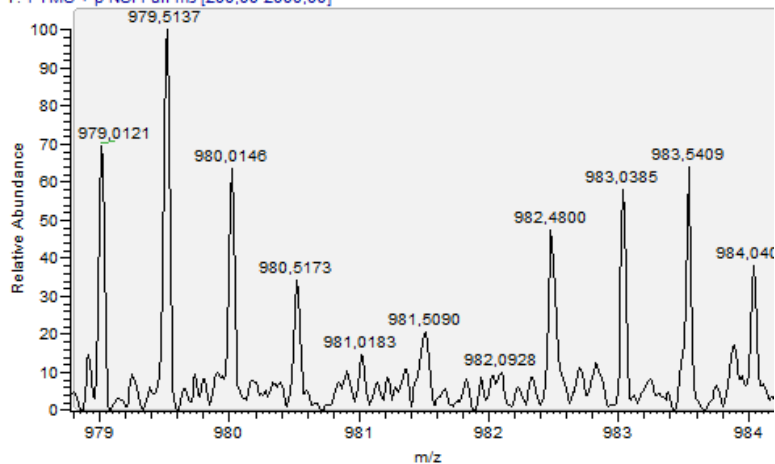

cortex\_03 #12337-12793 RT: 63.73-65.55 AV: 72 NL: 2,68E3

T: FTMS + p NSI Full ms [200.00-2000.00]

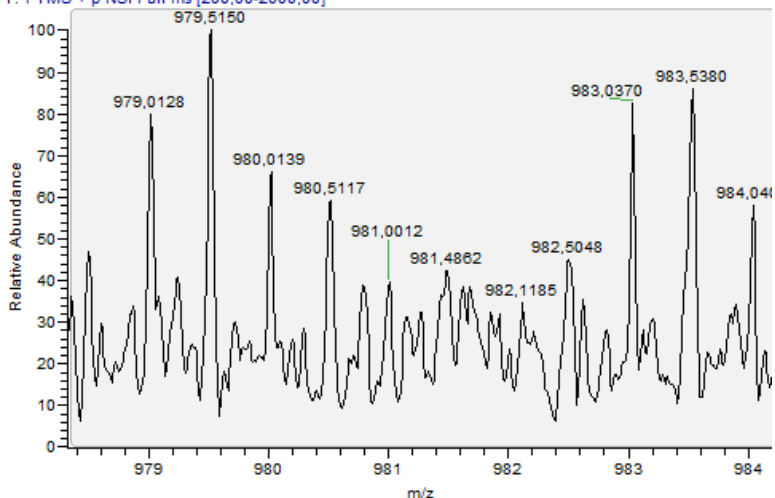

cortex\_04 #12155-12595 RT: 64.44-66.27 AV: 78 NL: 2,15E3

T: FTMS + p NSI Full ms [200.00-2000.00]

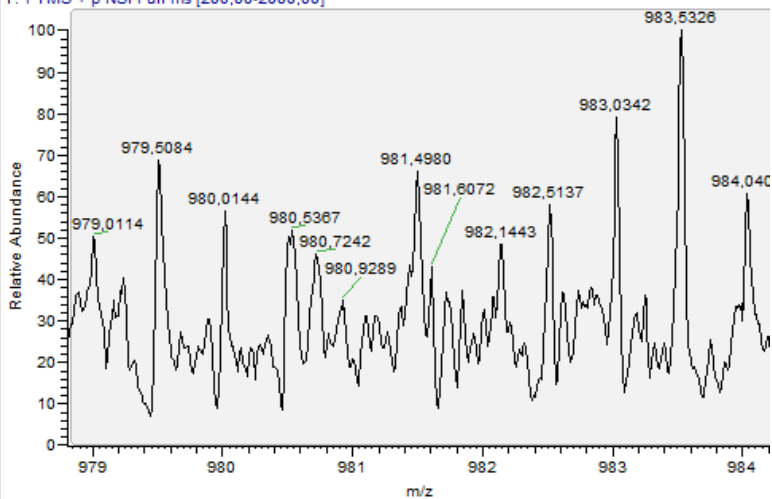

# ELFADKVPKTAENFRAL 3+

cortex\_01 #8175 RT: 52.02 AV: 1 NL: 2,21E5  
T: FTMS + p NSI Full ms [200,00-2000,00]

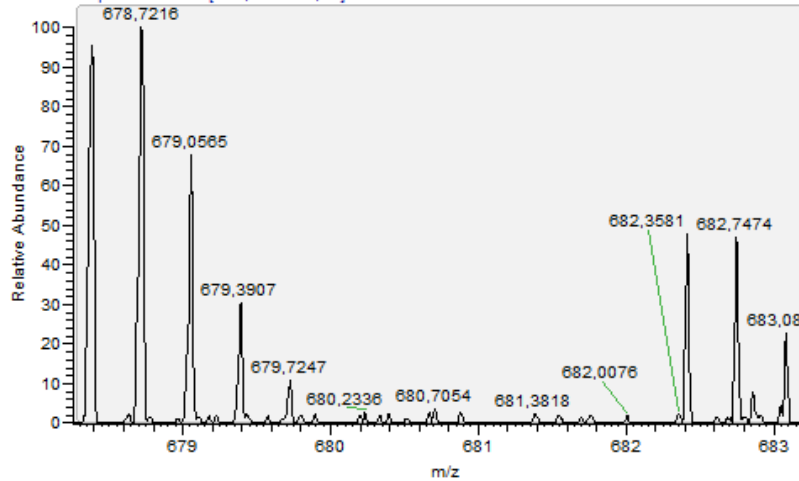

cortex\_03 #10200-10571 RT: 55.20-56.66 AV: 61 NL: 2,77E4  
T: FTMS + p NSI Full ms [200,00-2000,00]

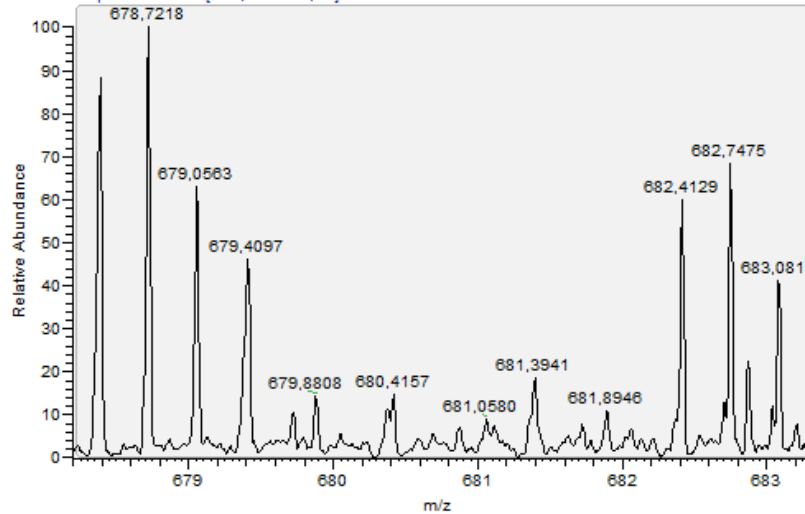

cortex\_04 #9861-10203 RT: 54.46-55.93 AV: 78 NL: 4,43E4  
T: FTMS + p NSI Full ms [200,00-2000,00]

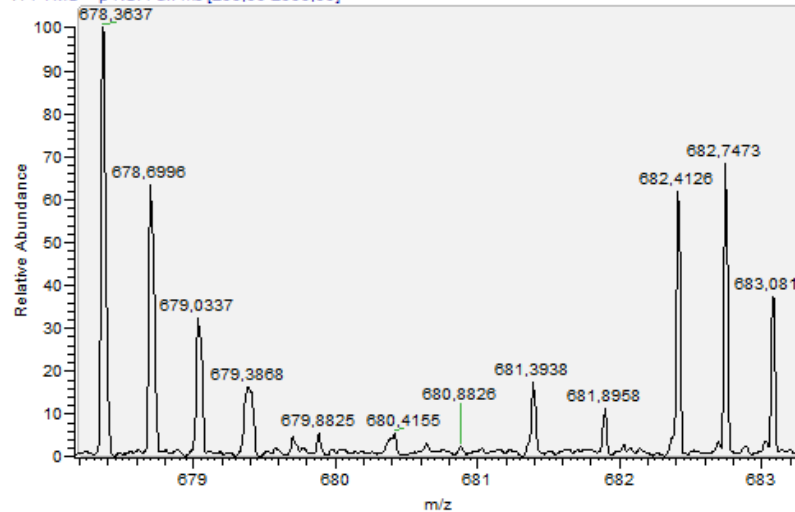

# LFADKVPKTAENFRAL 3+

cortex\_01 #6855-7102 RT: 44.15-45.55 AV: 26 NL: 7.43E4  
T: FTMS + p NSI Full ms [200.00-2000.00]

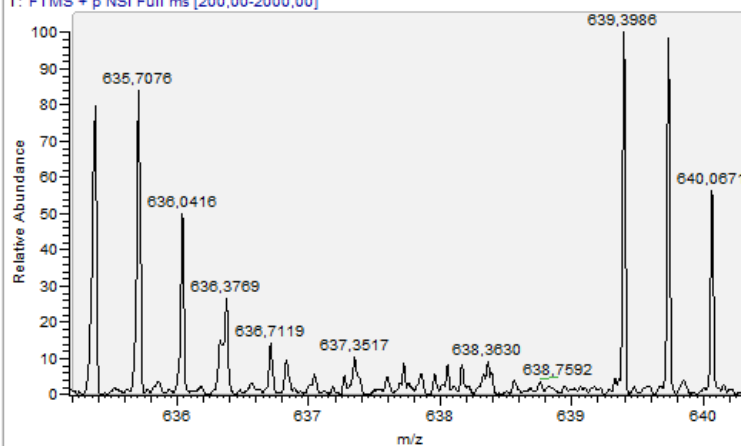

cortex\_03 #8901-9270 RT: 50.03-51.48 AV: 62 NL: 1.80E4  
T: FTMS + p NSI Full ms [200.00-2000.00]

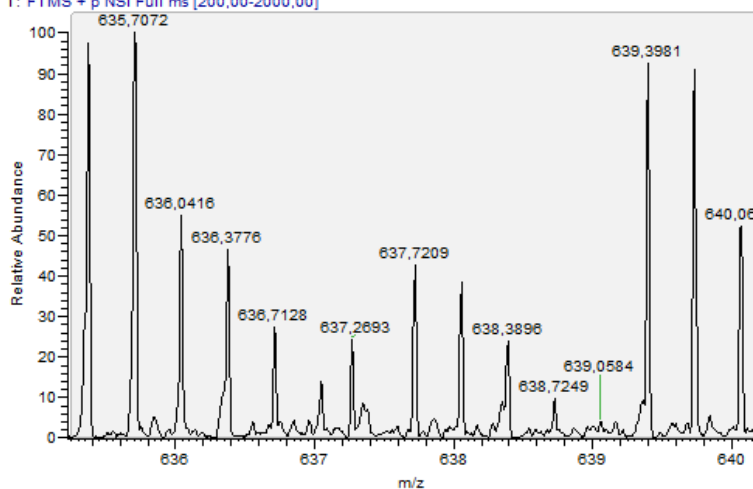

cortex\_04 #8559-8732 RT: 48.89-49.61 AV: 35 NL: 1.40E4  
T: FTMS + p NSI Full ms [200.00-2000.00]

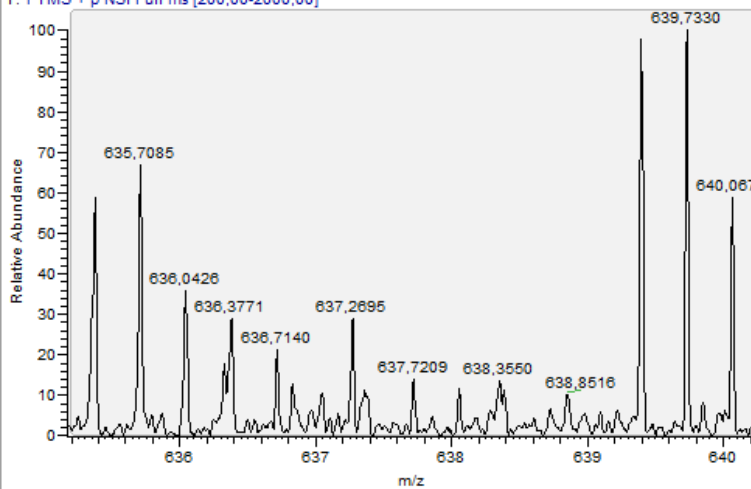

# ADKVPKTAENFRAL 3+

cortex\_01 #4456-4724 RT: 30.43-31.85 AV: 15 NL: 1.01E6  
T: FTMS + p NSI Full ms [200.00-2000.00]

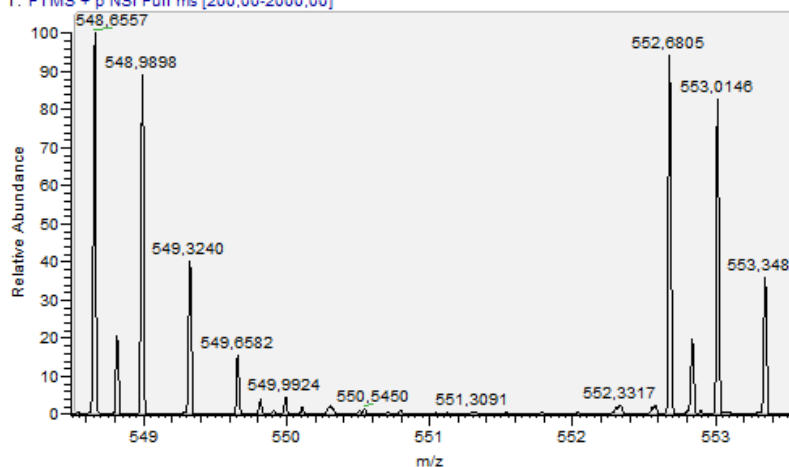

cortex\_03 #6147-6506 RT: 38.91-40.37 AV: 75 NL: 1.86E5  
T: FTMS + p NSI Full ms [200.00-2000.00]

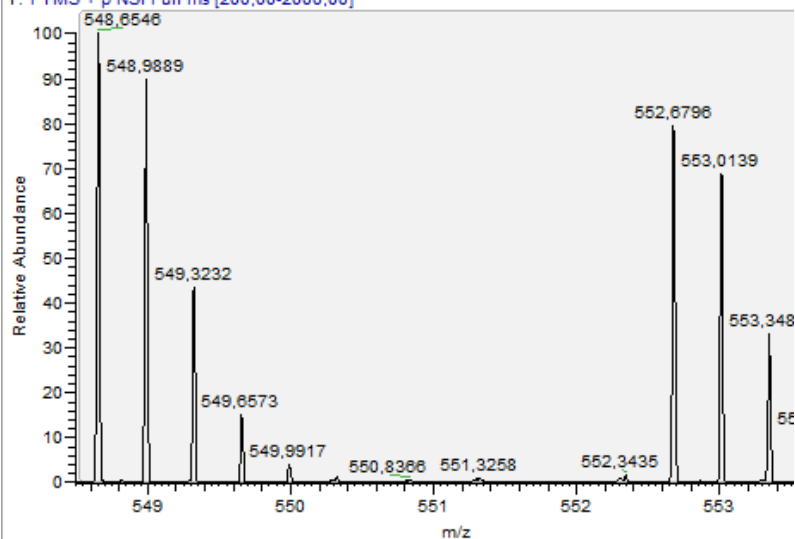

cortex\_04 #6090-6434 RT: 38.15-39.60 AV: 90 NL: 4.96E4  
T: FTMS + p NSI Full ms [200.00-2000.00]

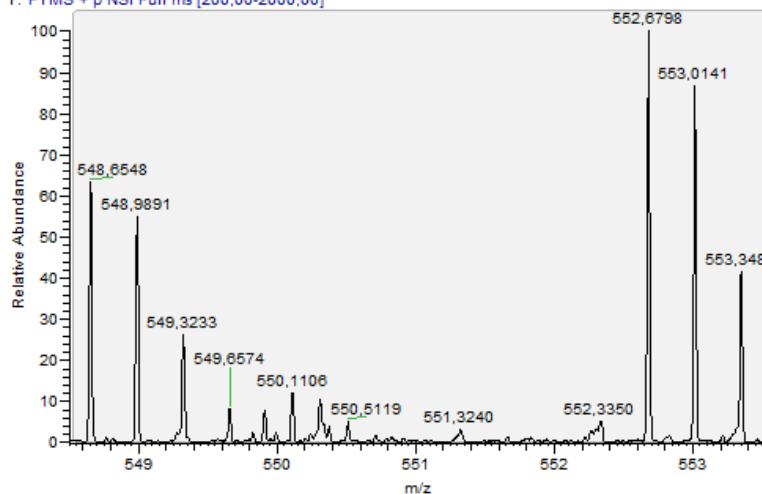

# ITADDEPLGRVSF 2+

cortex\_01 #8729 RT: 55,29 AV: 1 NL: 7,51E4  
T: FTMS + p NSI Full ms [200,00-2000,00]

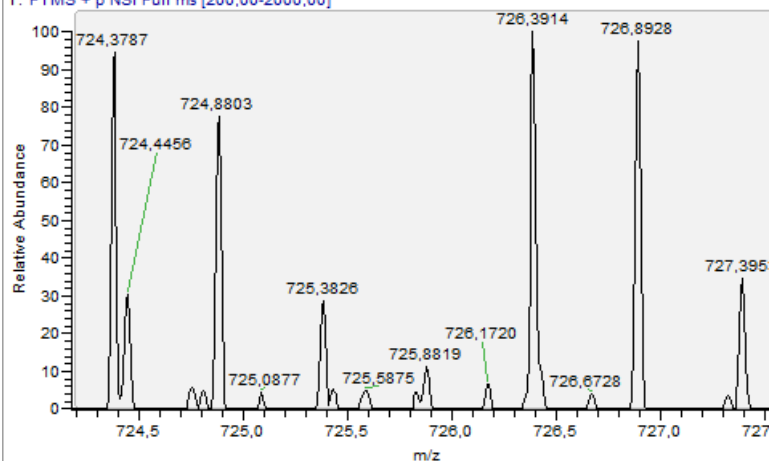

cortex\_03 #11136-11326 RT: 58,89-59,62 AV: 26 NL: 1,53E4  
T: FTMS + p NSI Full ms [200,00-2000,00]

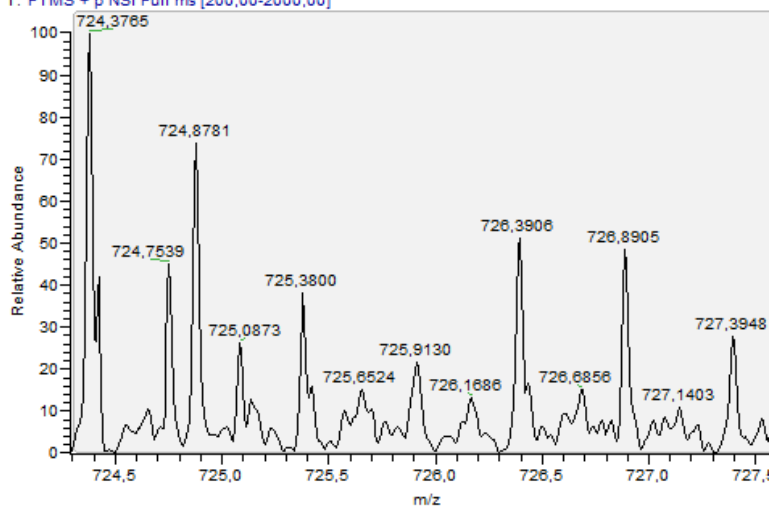

cortex\_04 #10886-11051 RT: 58,89-59,63 AV: 42 NL: 8,23E3  
T: FTMS + p NSI Full ms [200,00-2000,00]

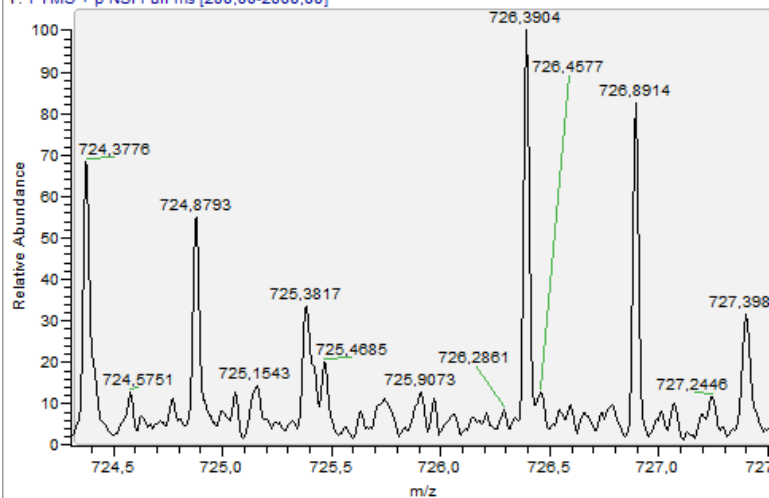

# ADKVPKTAENF 2+

cortex\_01 #3550-3760 RT: 25,64-26,64 AV: 10 NL: 7,20E5

T: FTMS + p NSI Full ms [200,00-2000,00]

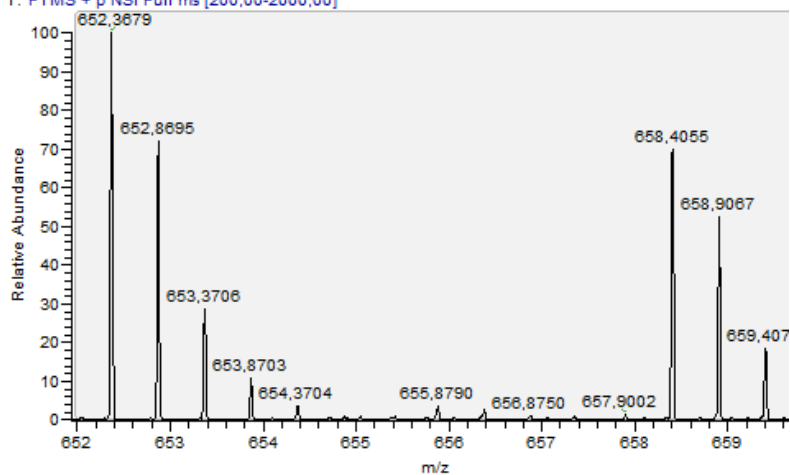

cortex\_03 #4715-4900 RT: 32,98-33,70 AV: 34 NL: 1,09E5

T: FTMS + p NSI Full ms [200,00-2000,00]

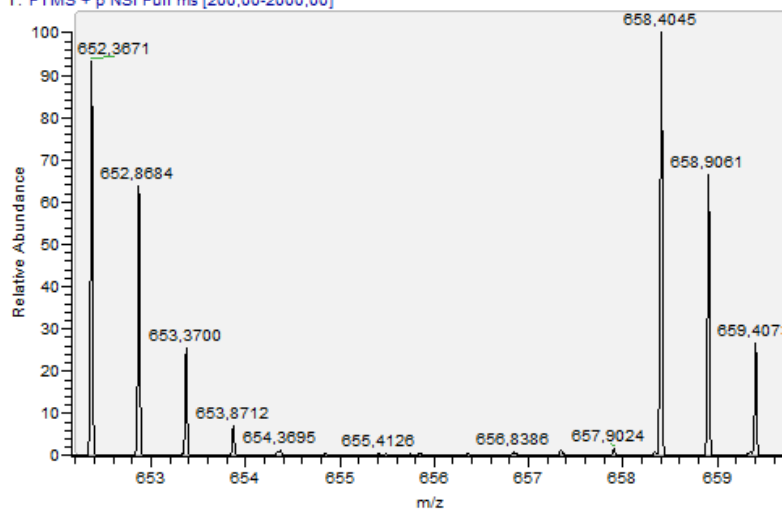

cortex\_04 #4634-4807 RT: 31,86-32,59 AV: 48 NL: 1,18E5

T: FTMS + p NSI Full ms [200,00-2000,00]

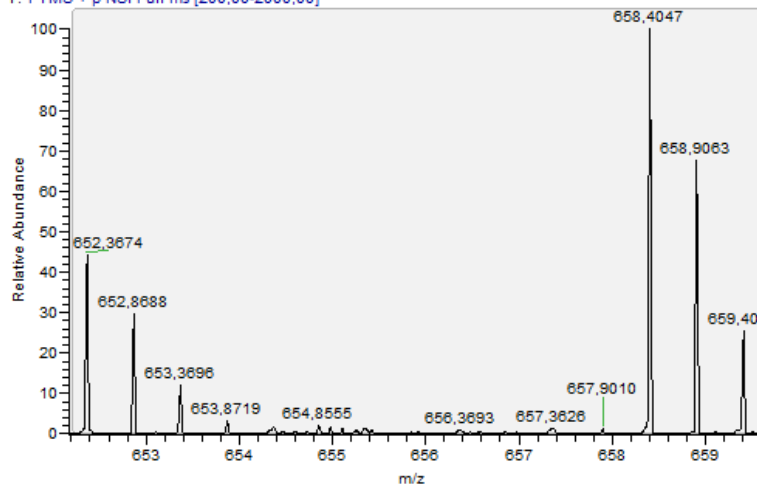



# ADDEPLGRVSF 2+

cortex\_01 #7346-7470 RT: 47,13-47,76 AV: 7 NL: 1,16E5

T: FTMS + p NSI Full ms [200,00-2000,00]

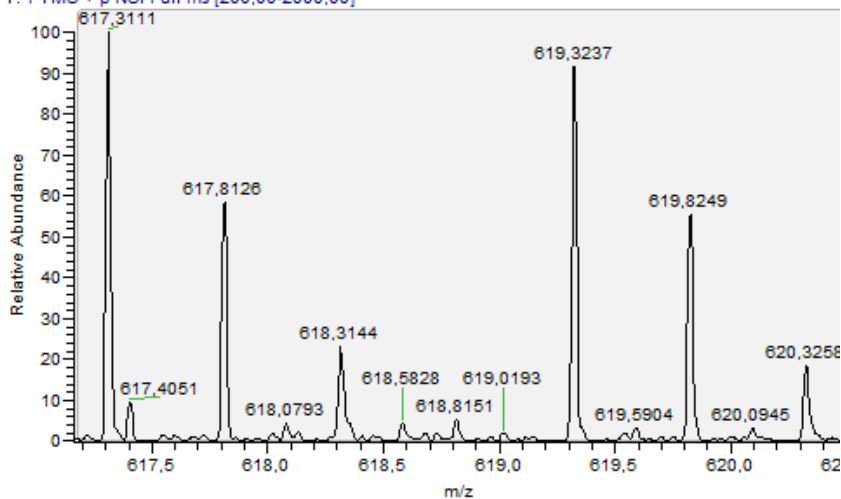

cortex\_03 #9824-10291 RT: 53,73-55,54 AV: 76 NL: 1,49E4

T: FTMS + p NSI Full ms [200,00-2000,00]

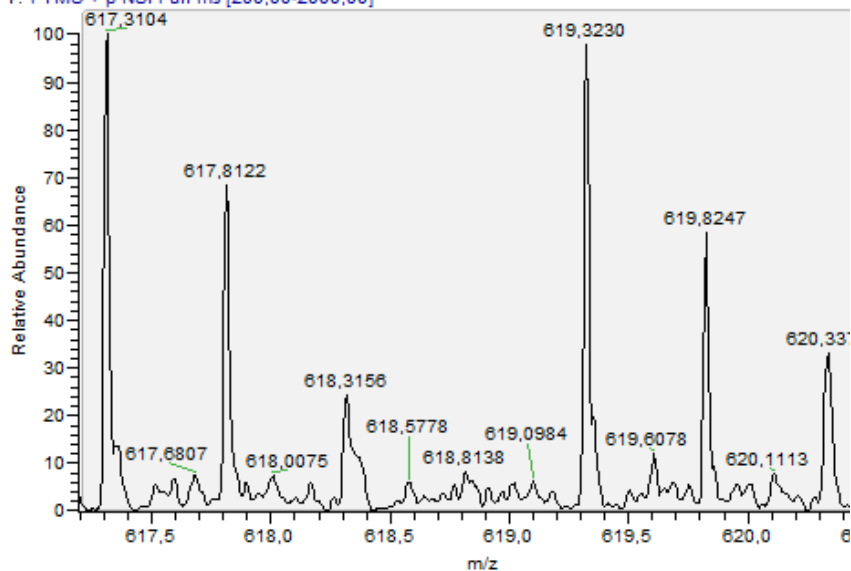

cortex\_04 #9684-9943 RT: 53,70-54,80 AV: 58 NL: 1,95E4

T: FTMS + p NSI Full ms [200,00-2000,00]

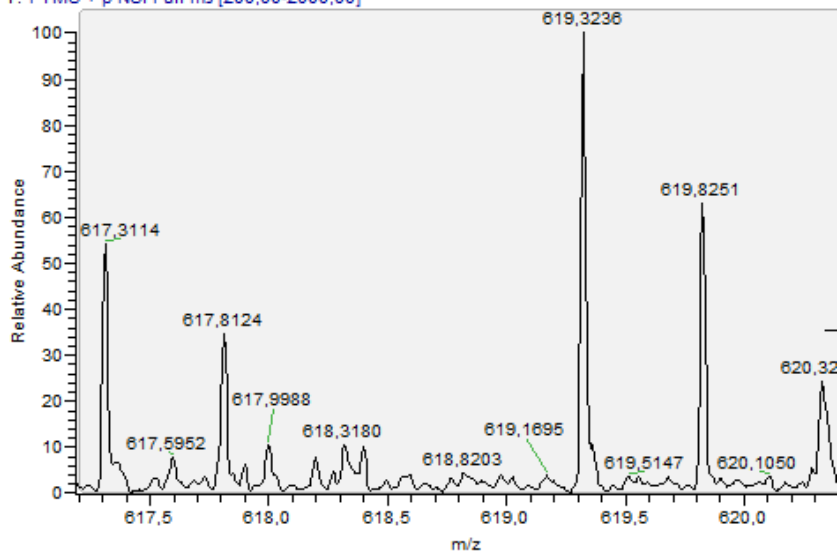

# SGQAAARPLVA 2+

cortex\_01 #3140-3344 RT: 23,37-24,41 AV: 10 NL: 2,26E5

T: FTMS + p NSI Full ms [200,00-2000,00]

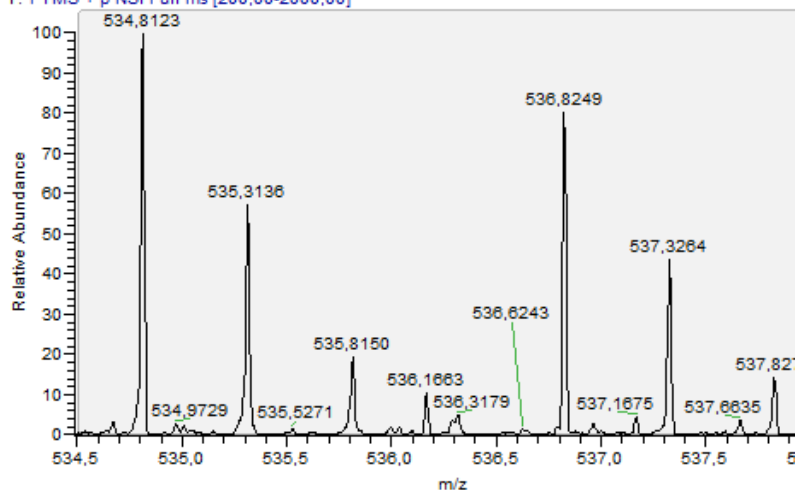

cortex\_03 #4103-4370 RT: 30,38-31,48 AV: 58 NL: 2,14E4

T: FTMS + p NSI Full ms [200,00-2000,00]

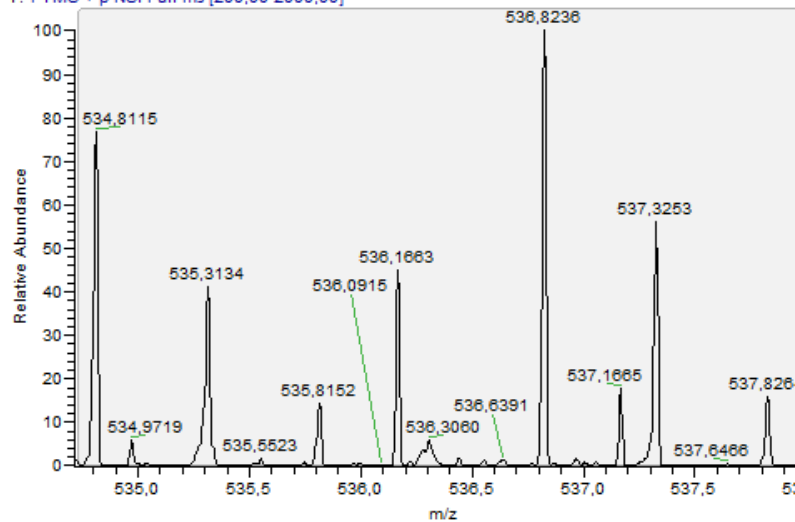

cortex\_04 #3935-4285 RT: 28,89-30,37 AV: 97 NL: 3,68E4

T: FTMS + p NSI Full ms [200,00-2000,00]

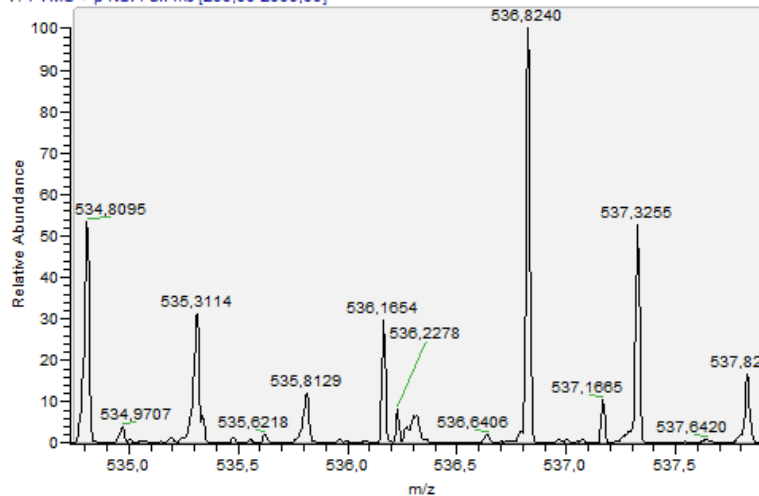

# KGP GPGGPGGAGGARGGAGGGPSGD 2+

cortex\_01 #2174-2416 RT: 17.83-19.24 AV: 12 NL: 7,27E3  
T: FTMS + p NSI Full ms [200,00-2000,00]

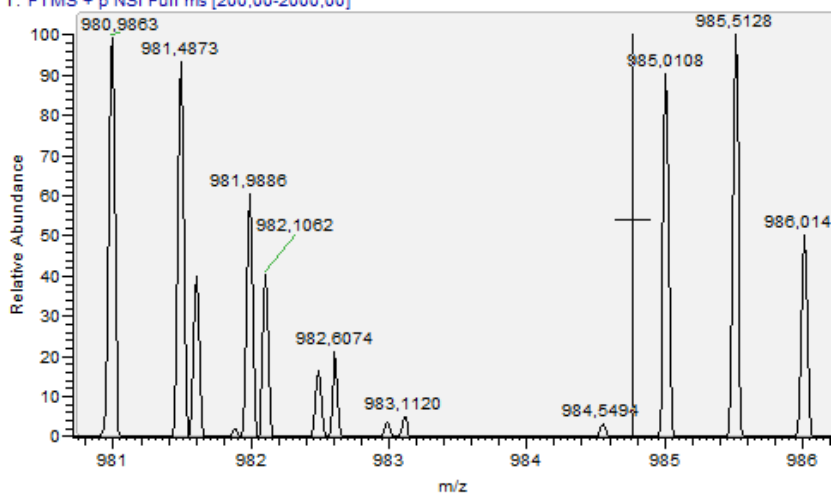

cortex\_03 #2453-2681 RT: 22.97-24.08 AV: 77 NL: 1,85E2  
T: FTMS + p NSI Full ms [200,00-2000,00]

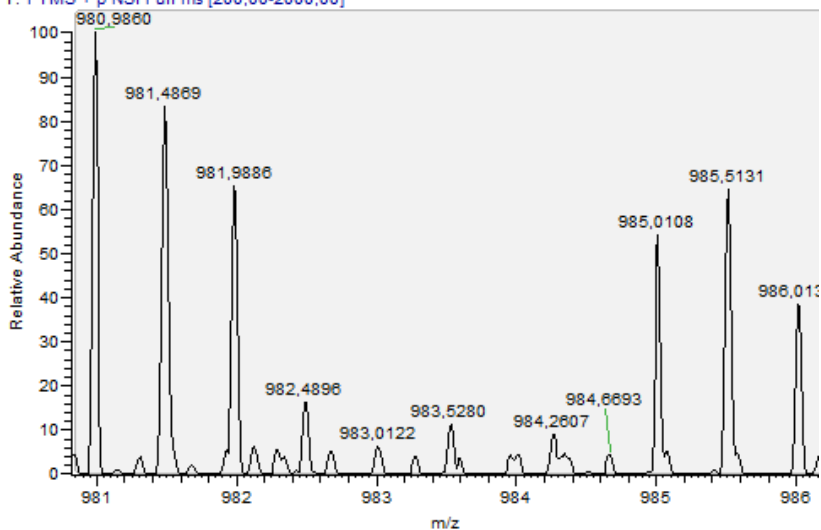

cortex\_04 #2337-2510 RT: 22.22-22.96 AV: 42 NL: 9,71E2  
T: FTMS + p NSI Full ms [200,00-2000,00]

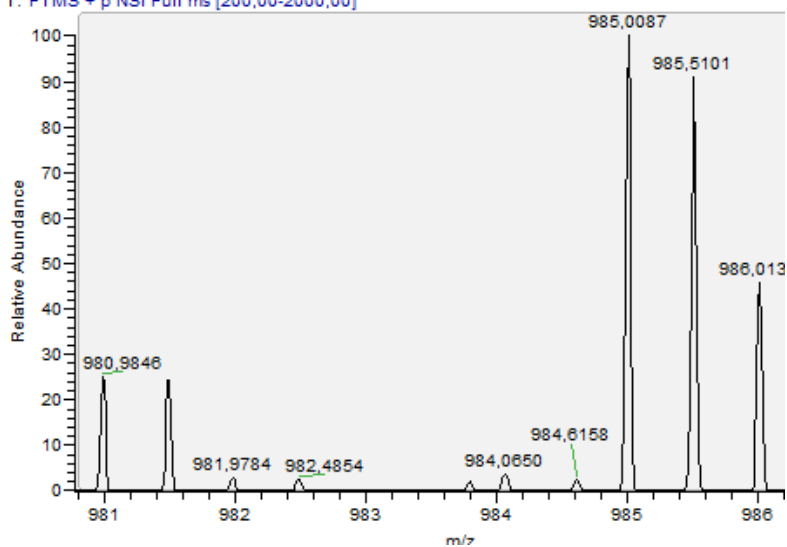

# RKGP GPGPGGAGGARGGAGGGPSGD 3+

cortex\_01 #1881-2174 RT: 15,92-17,70 AV: 16 NL: 1,51E4

T: FTMS + p NSI Full ms [200,00-2000,00]

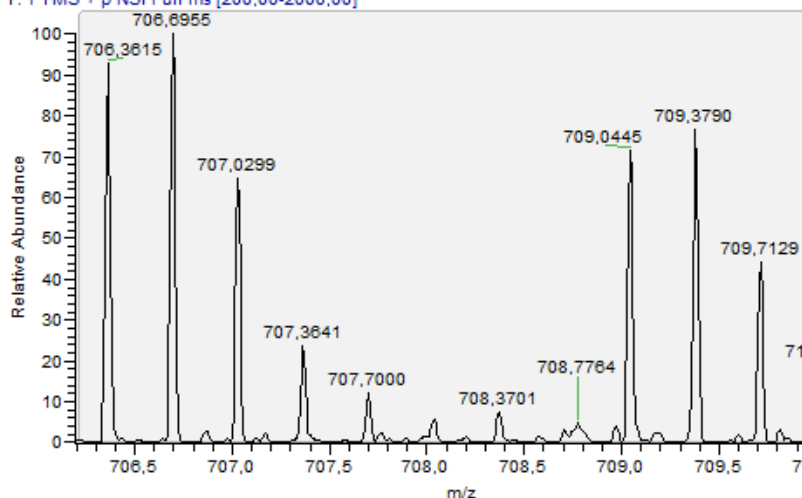

cortex\_03 #2312-2599 RT: 22,23-23,70 AV: 111 NL: 2,48E3

T: FTMS + p NSI Full ms [200,00-2000,00]

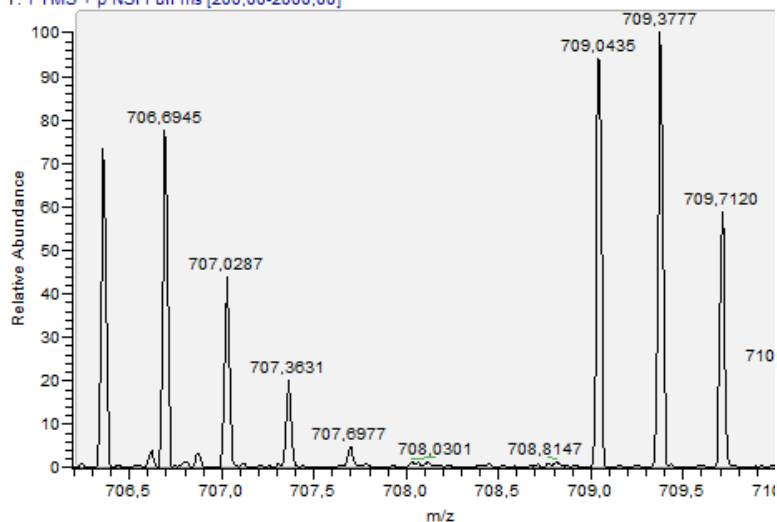

cortex\_04 #2005-2250 RT: 20,75-21,85 AV: 70 NL: 2,38E3

T: FTMS + p NSI Full ms [200,00-2000,00]

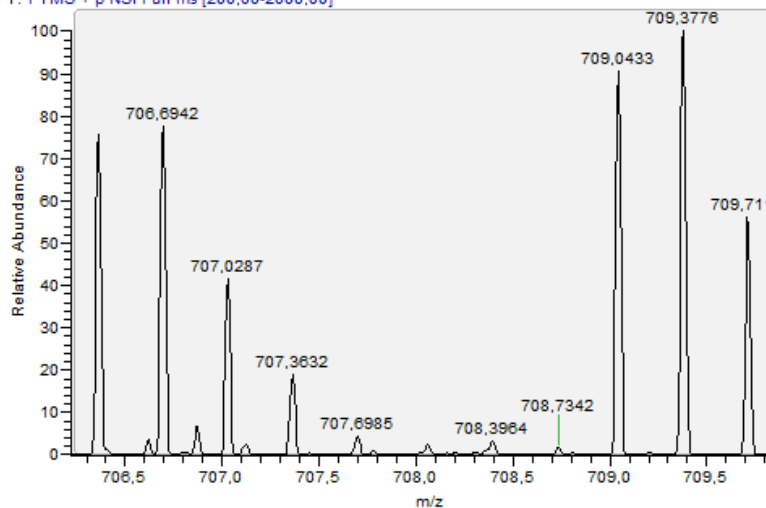

# KQATVGDVNTDRPGLLDL 3+

cortex\_01 #7716-8022 RT: 49,26-51,05 AV: 26 NL: 6,71E4  
T: FTMS + p NSI Full ms [200,00-2000,00]

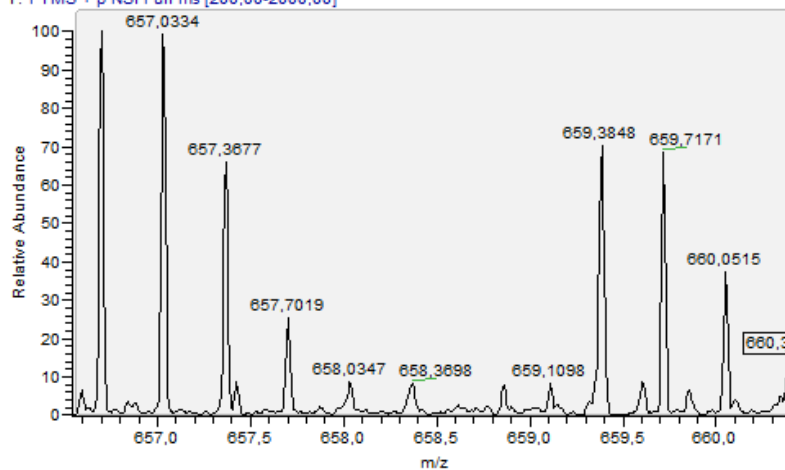

cortex\_03 #10648 RT: 56,97 AV: 1 NL: 5,26E4  
T: FTMS + p NSI Full ms [200,00-2000,00]

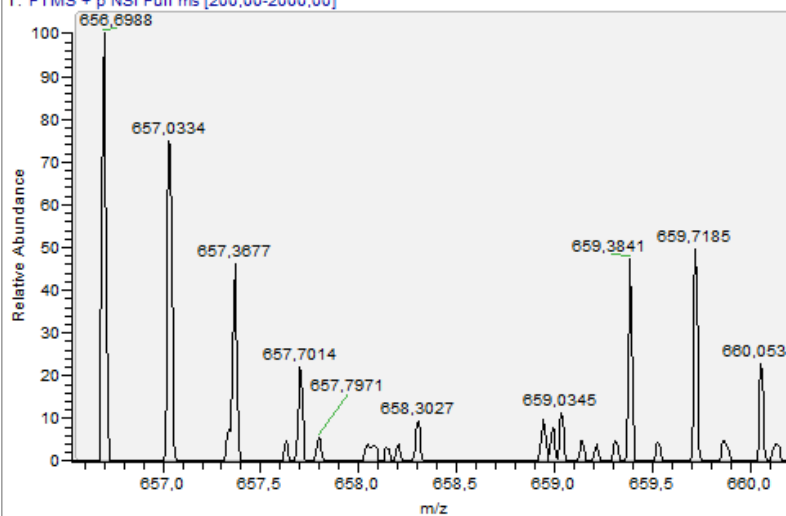

cortex\_04 #9943-10203 RT: 54,82-55,93 AV: 59 NL: 2,21E4  
T: FTMS + p NSI Full ms [200,00-2000,00]

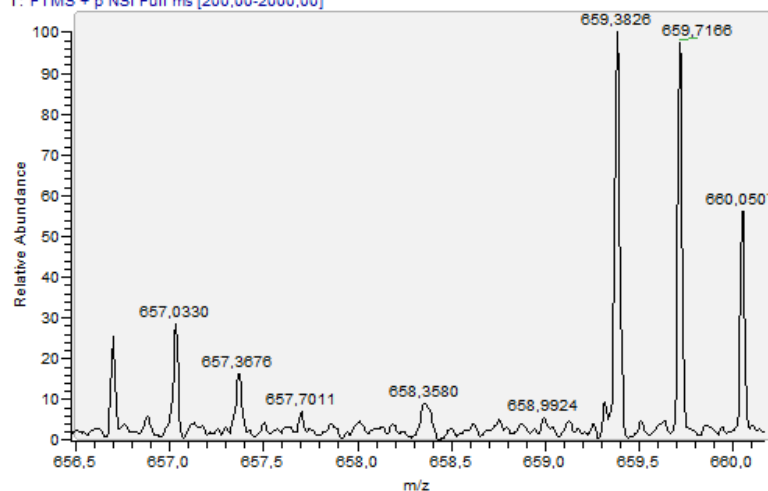

# AANSKVAFSVRSTN 2+

cortex\_01 #3478-3830 RT: 25,21-26,96 AV: 17 NL: 1,34E4  
T: FTMS + p NSI Full ms [200,00-2000,00]

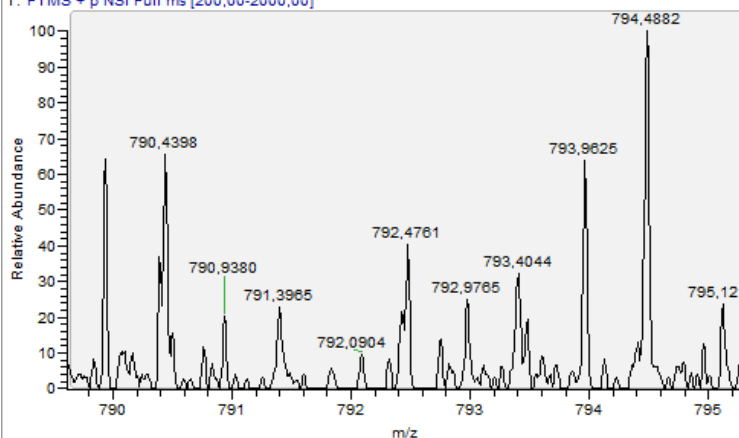

cortex\_03 #4715-4986 RT: 32,98-34,08 AV: 57 NL: 2,45E3  
T: FTMS + p NSI Full ms [200,00-2000,00]

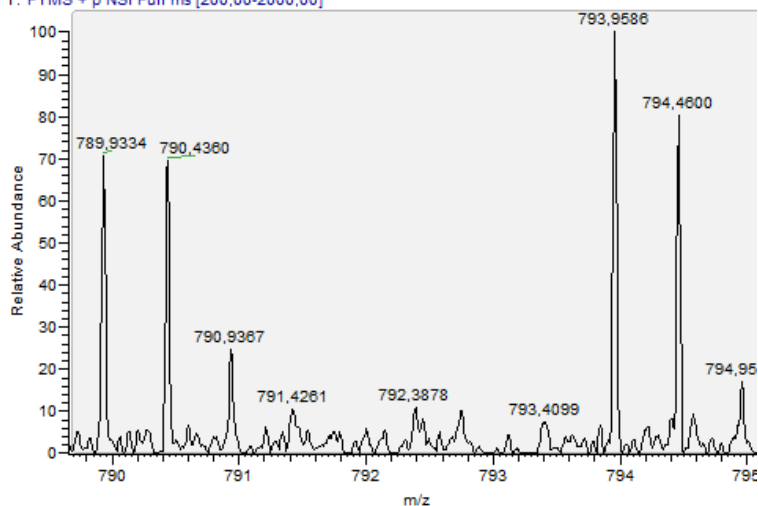

cortex\_04 #4368-4982 RT: 30,74-33,32 AV: 160 NL: 2,43E3  
T: FTMS + p NSI Full ms [200,00-2000,00]

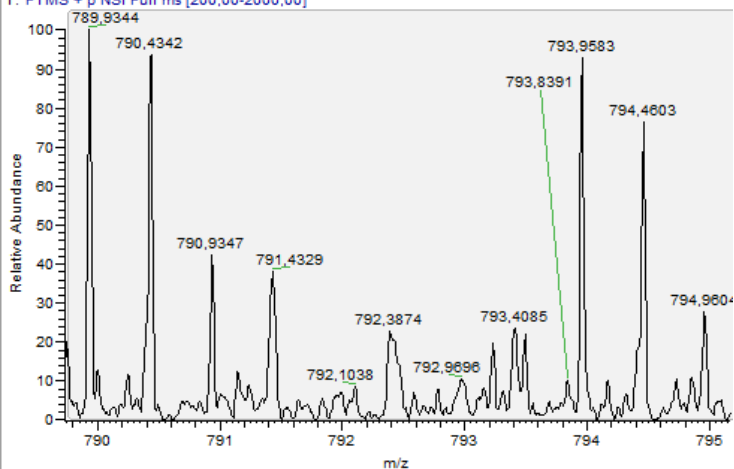

# HNPHVNPLPTGYEDE 2+

cortex\_01 #4724-5052 RT: 31,85-33,59 AV: 19 NL: 3,98E4

T: FTMS + p NSI Full ms [200,00-2000,00]

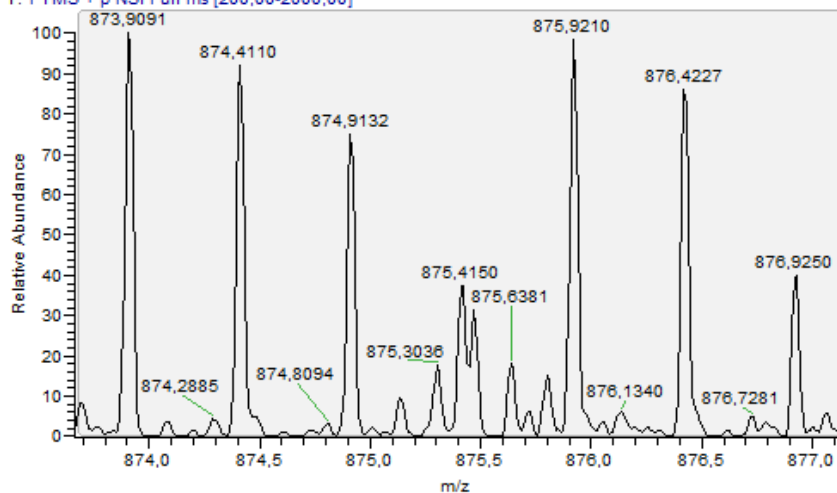

cortex\_03 #5965-6232 RT: 38,15-39,25 AV: 57 NL: 5,47E3

T: FTMS + p NSI Full ms [200,00-2000,00]

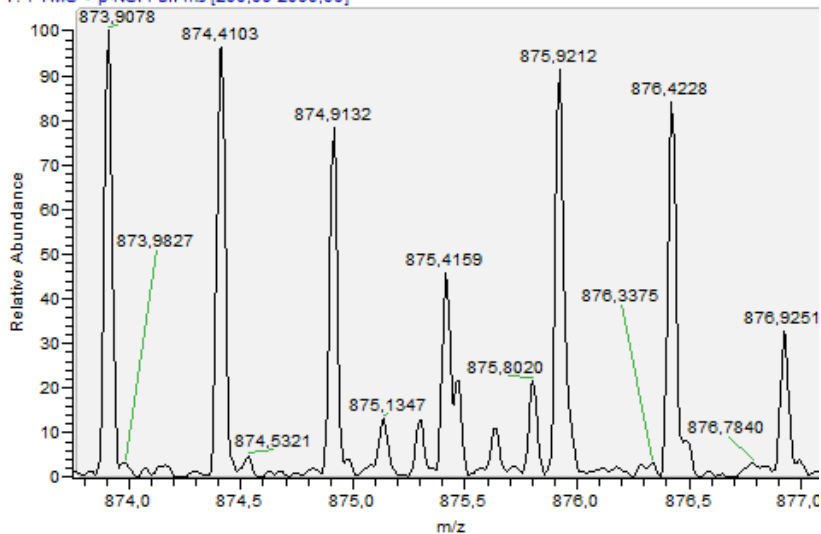

cortex\_04 #6044 RT: 37,94 AV: 1 NL: 2,24E4

T: FTMS + p NSI Full ms [200,00-2000,00]

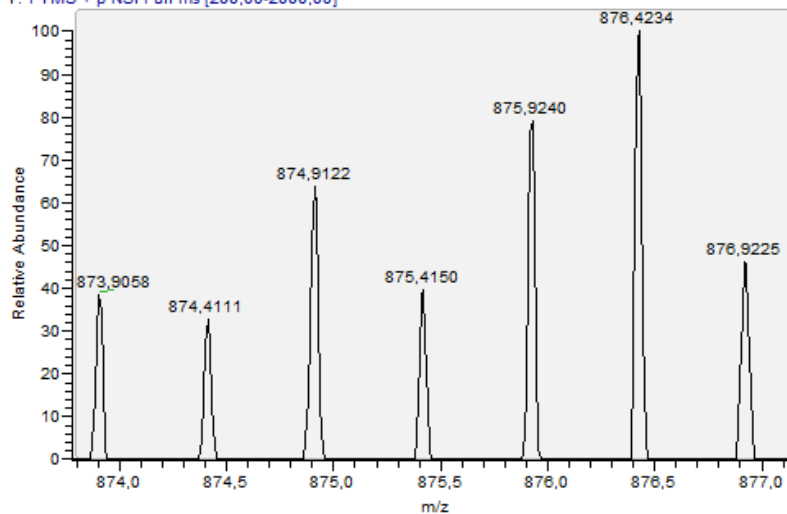

# ADEVASLAKQGL

cortex\_01 #6303 RT: 40.82 AV: 1 NL: 6.33E5  
T: FTMS + p NSI Full ms [200.00-2000.00]

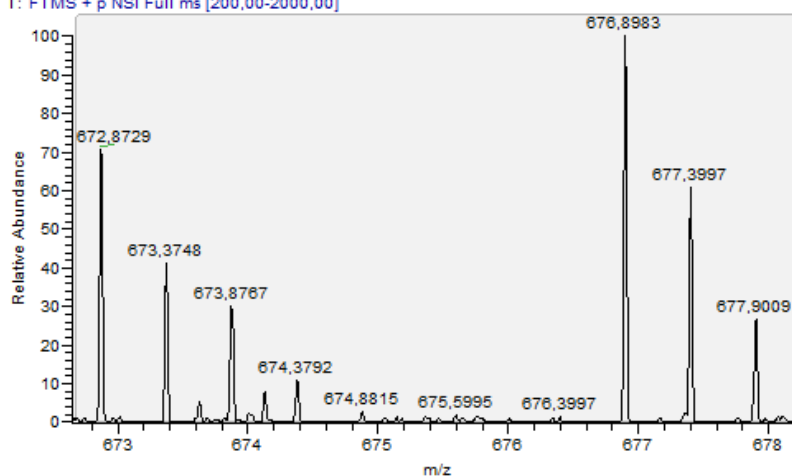

cortex\_03 #8076-8432 RT: 46.68-48.13 AV: 76 NL: 2.76E4  
T: FTMS + p NSI Full ms [200.00-2000.00]

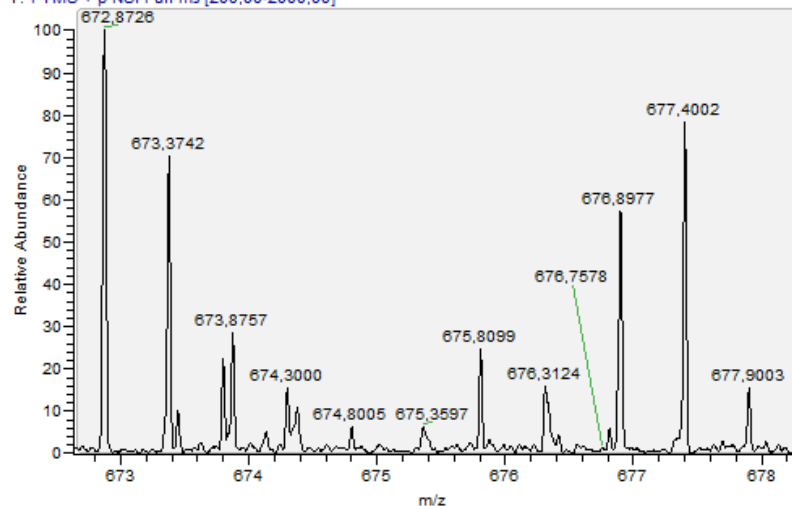

cortex\_04 #7883-8213 RT: 45.94-47.40 AV: 79 NL: 1.67E4  
T: FTMS + p NSI Full ms [200.00-2000.00]

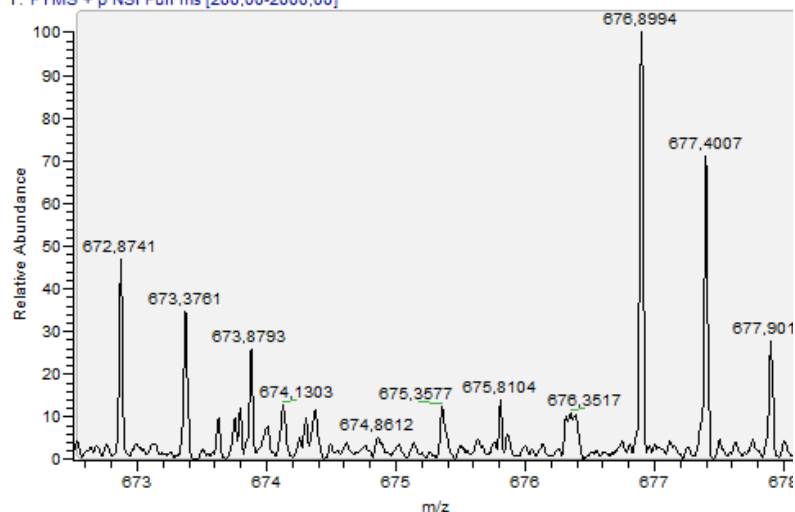



# SANSNPAMAPRE 2+

cortex\_01 #2610 RT: 20,40 AV: 1 NL: 1,39E5  
T: FTMS + p NSI Full ms [200,00-2000,00]

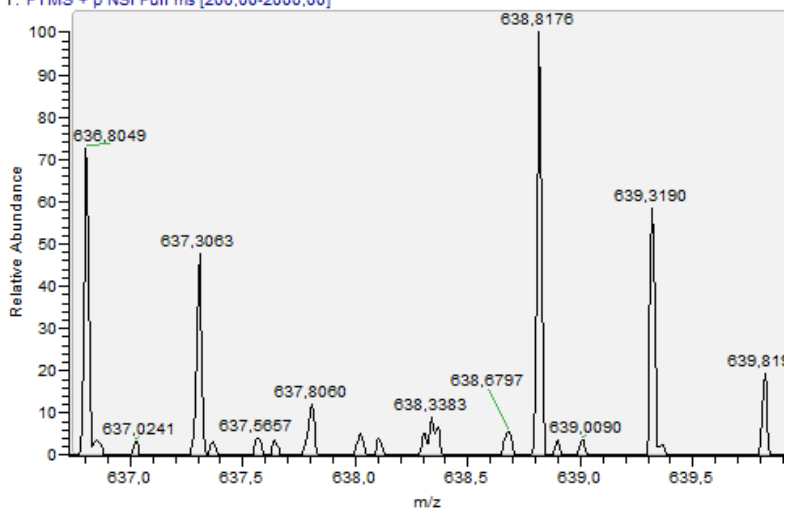

cortex\_03 #3085-3415 RT: 25,92-27,40 AV: 92 NL: 3,27E4  
T: FTMS + p NSI Full ms [200,00-2000,00]

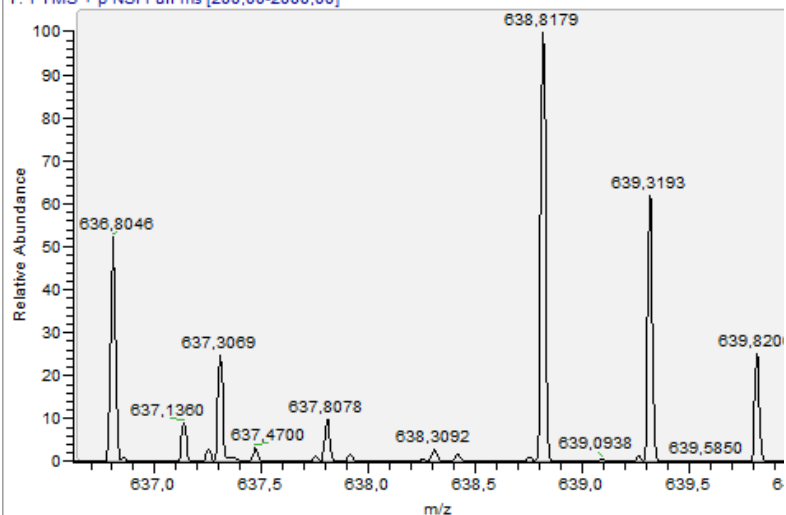

cortex\_04 #3231-3329 RT: 25,94-26,28 AV: 13 NL: 2,22E5  
T: FTMS + p NSI Full ms [200,00-2000,00]

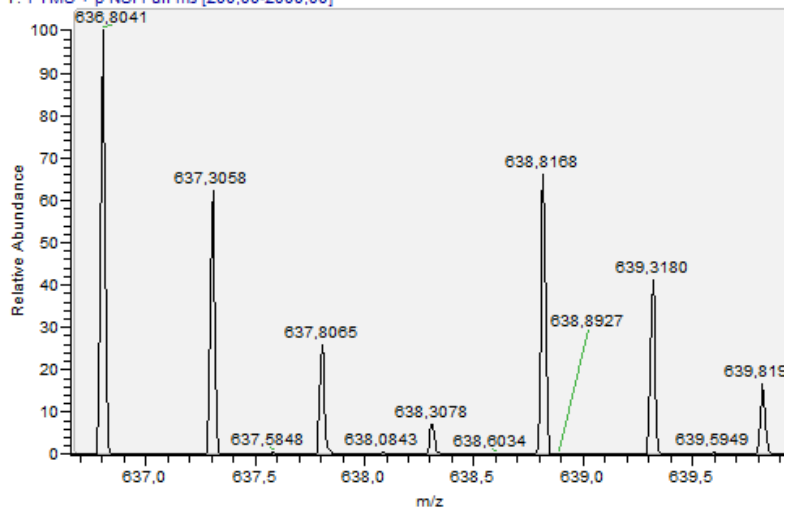

## SANSNPAMAPRE 2+ (methionine oxidation)

cortex\_03 #2453-3085 RT: 22,97-25,92 AV: 190 NL: 2,43E4  
T: FTMS + p NSI Full ms [200,00-2000,00]

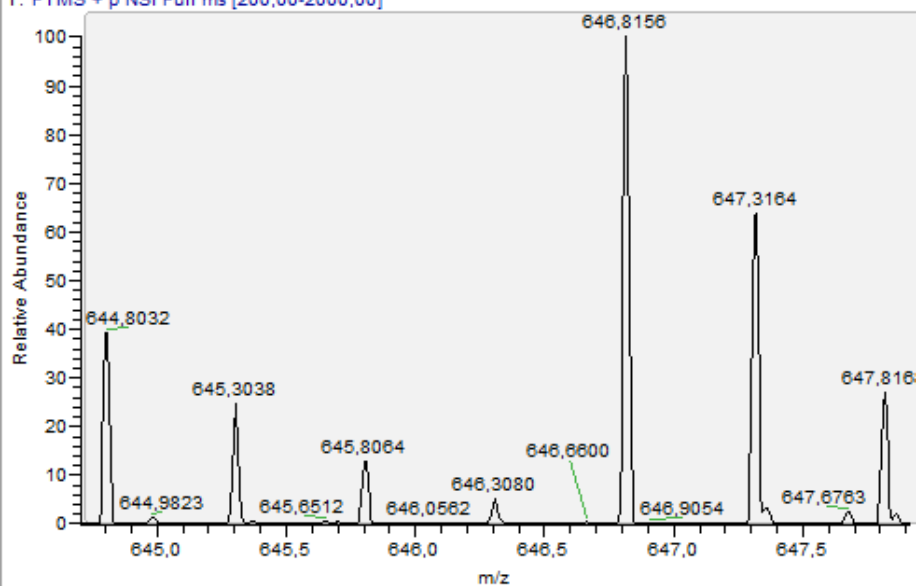

cortex\_04 #2354-2826 RT: 22,30-24,24 AV: 103 NL: 8,07E4  
T: FTMS + p NSI Full ms [200,00-2000,00]

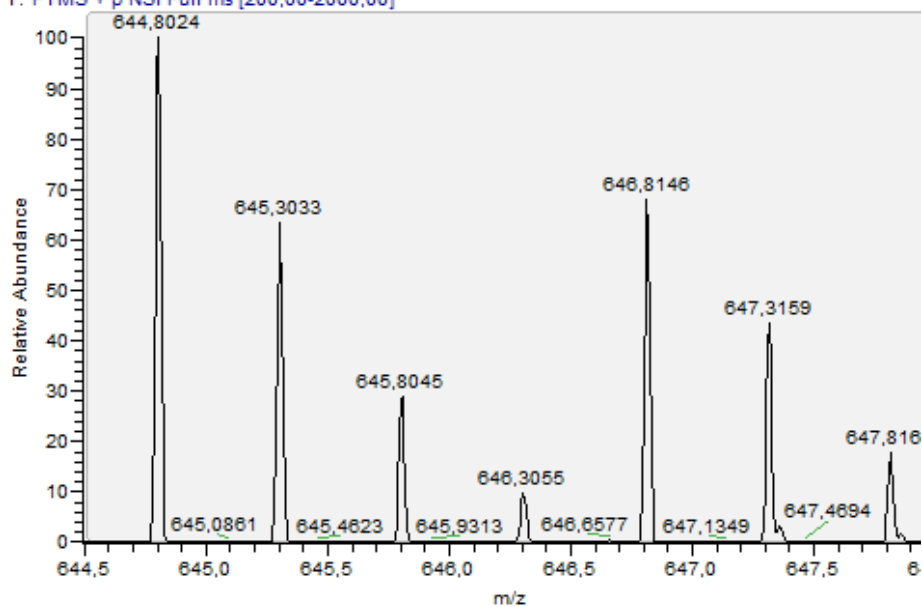

# DDEESEAQGPK 2+

cortex\_03 #2283 RT: 22,06 AV: 1 NL: 8,14E3

T: FTMS + p NSI Full ms [200,00-2000,00]

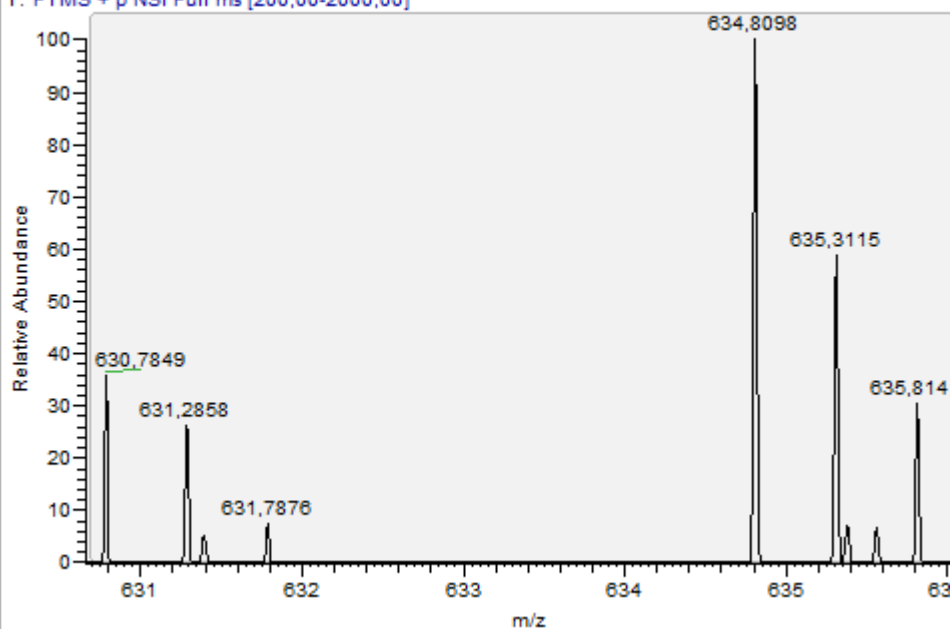

cortex\_04 #2082-2419 RT: 21,12-22,59 AV: 88 NL: 2,41E3

T: FTMS + p NSI Full ms [200,00-2000,00]

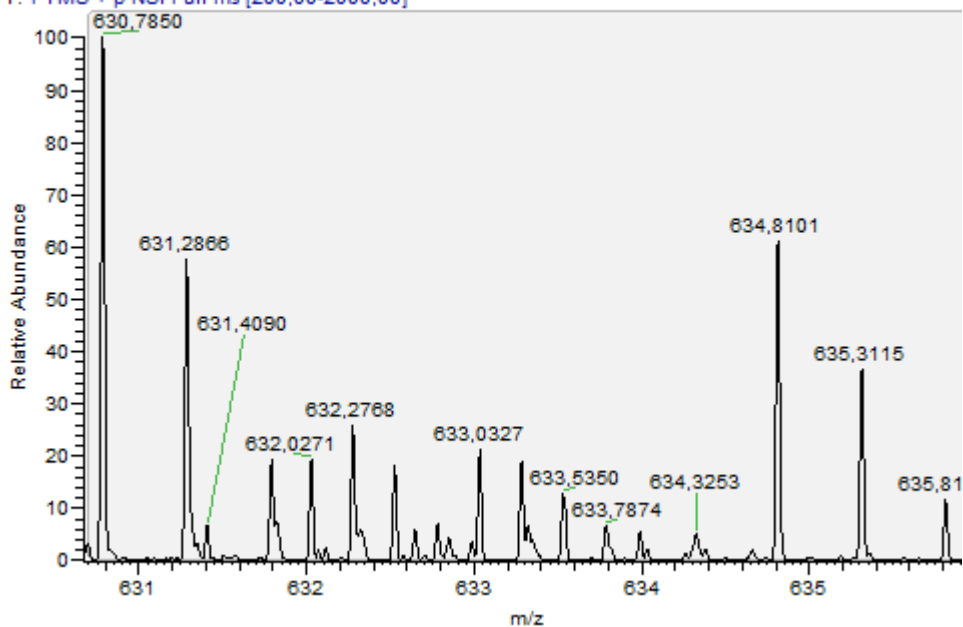

# SLSAASAPLVETSTPLRL 2+

cortex\_01 #10219-10600 RT: 64,16-66,19 AV: 18 NL: 1,47E4  
T: FTMS + p NSI Full ms [200,00-2000,00]

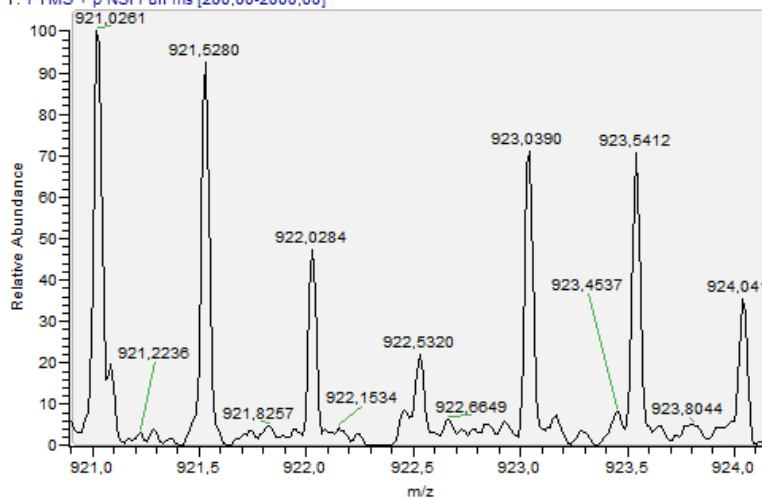

cortex\_03 #12979-13245 RT: 66,31-67,41 AV: 46 NL: 1,13E4  
T: FTMS + p NSI Full ms [200,00-2000,00]

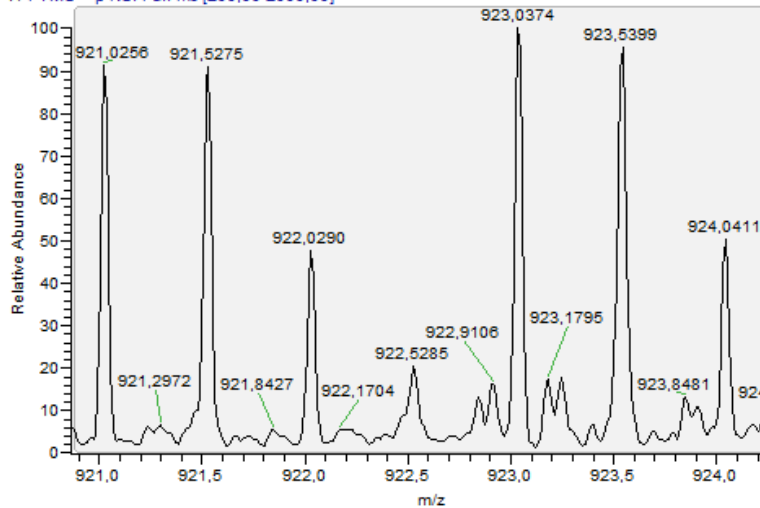

cortex\_04 #12509-12758 RT: 65,93-67,01 AV: 50 NL: 1,24E4  
T: FTMS + p NSI Full ms [200,00-2000,00]

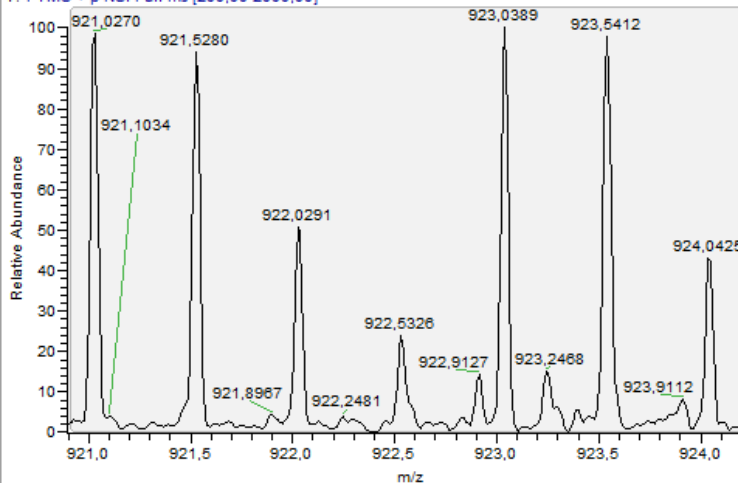

# TVGDVNTDRPGLLDL 2+

cortex\_01 #9337-9526 RT: 58,89-59,94 AV: 12 NL: 6,60E4  
T: FTMS + p NSI Full ms [200,00-2000,00]

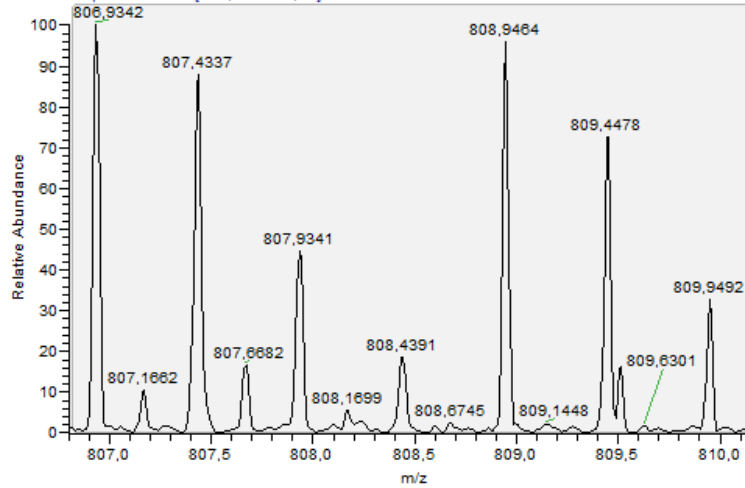

cortex\_03 #12160-12521 RT: 62,99-64,43 AV: 56 NL: 1,62E4  
T: FTMS + p NSI Full ms [200,00-2000,00]

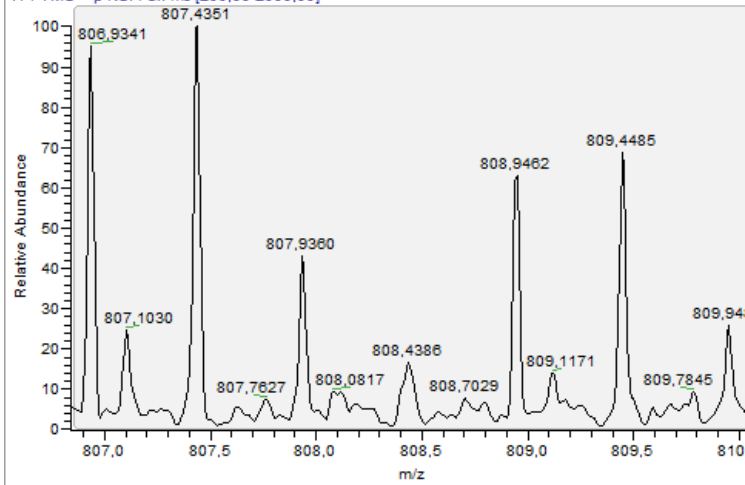

cortex\_04 #11632-11979 RT: 62,22-63,70 AV: 73 NL: 1,30E4  
T: FTMS + p NSI Full ms [200,00-2000,00]

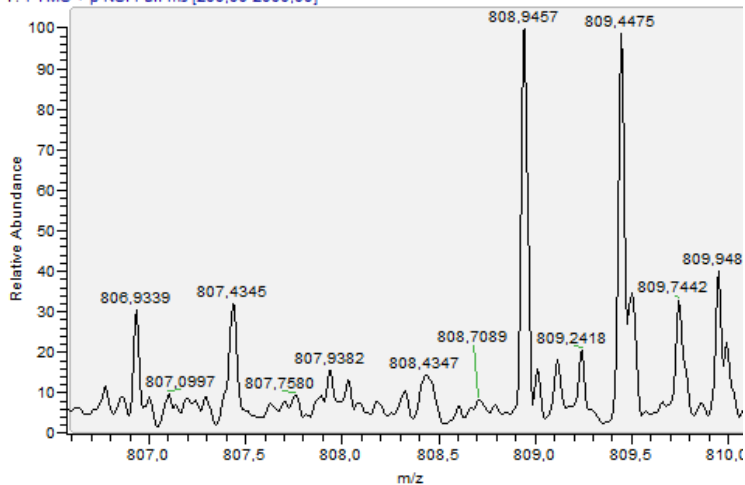

# VFDVELLKLE 2+

cortex\_01 #11352-11414 RT: 70.79-71.04 AV: 3 NL: 2.87E4

T: FTMS + p NSI Full ms [200.00-2000.00]

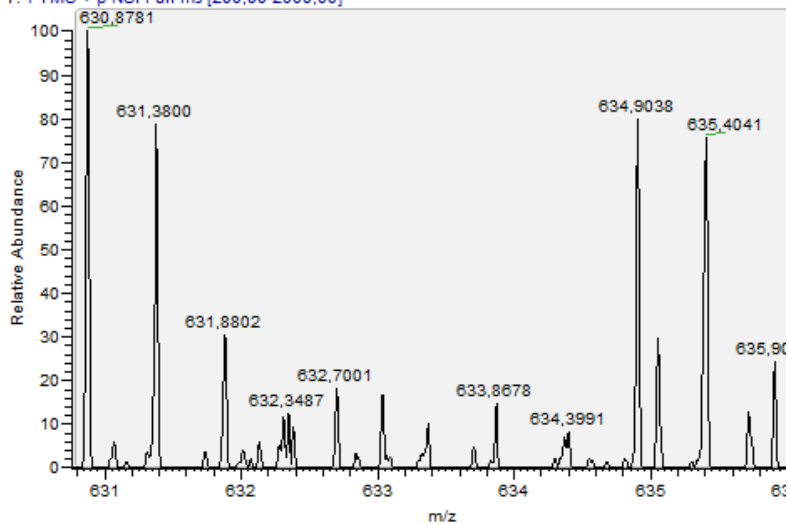

cortex\_03 #14420-14787 RT: 72.24-73.68 AV: 56 NL: 2.43E4

T: FTMS + p NSI Full ms [200.00-2000.00]

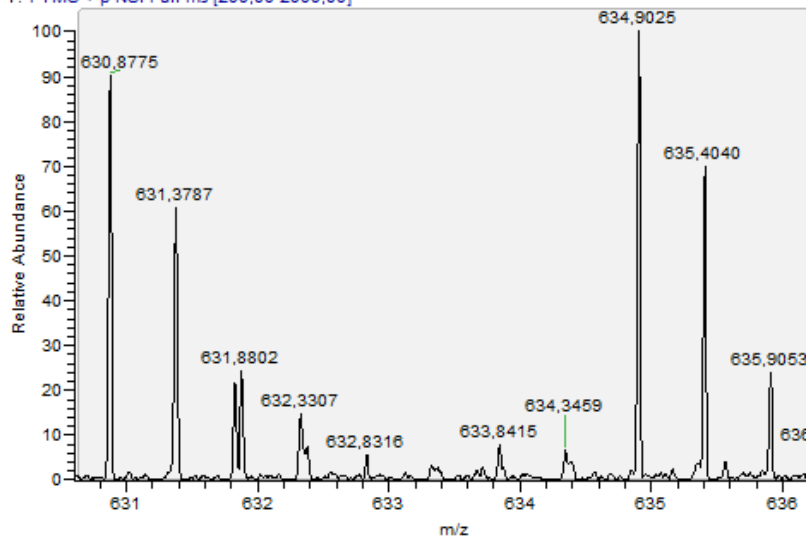

cortex\_04 #14109-14287 RT: 72.61-73.32 AV: 31 NL: 1.26E4

T: FTMS + p NSI Full ms [200.00-2000.00]

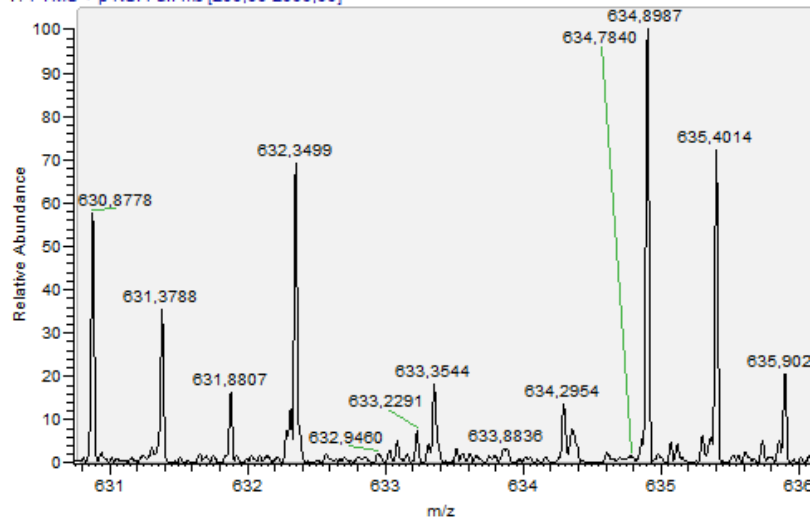

# GISTPEELGLDKV 2+

cortex\_01 #8458-8713 RT: 53,76-55,12 AV: 19 NL: 1,52E5

T: FTMS + p NSI Full ms [200,00-2000,00]

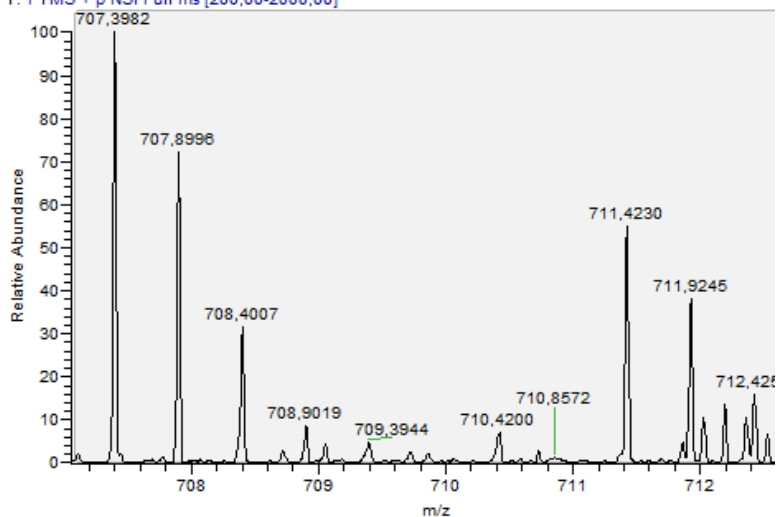

cortex\_03 #13079-13322 RT: 66,78-67,74 AV: 39 NL: 6,86E3

T: FTMS + p NSI Full ms [200,00-2000,00]

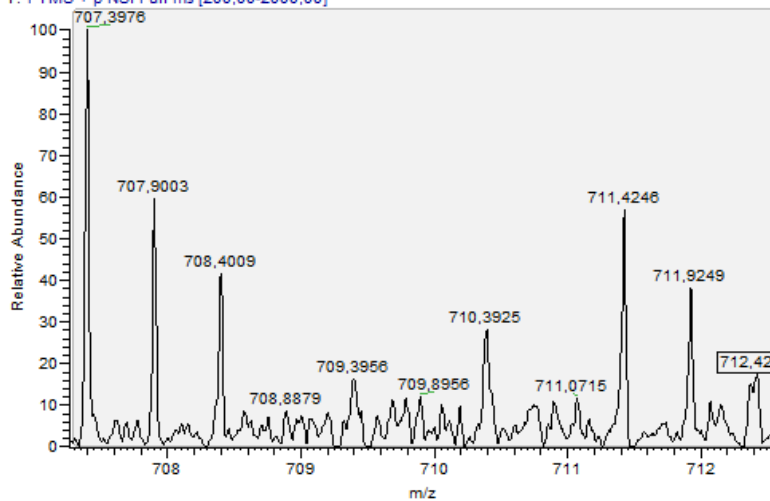

cortex\_04 #10539-10798 RT: 57,40-58,50 AV: 57 NL: 5,27E4

T: FTMS + p NSI Full ms [200,00-2000,00]

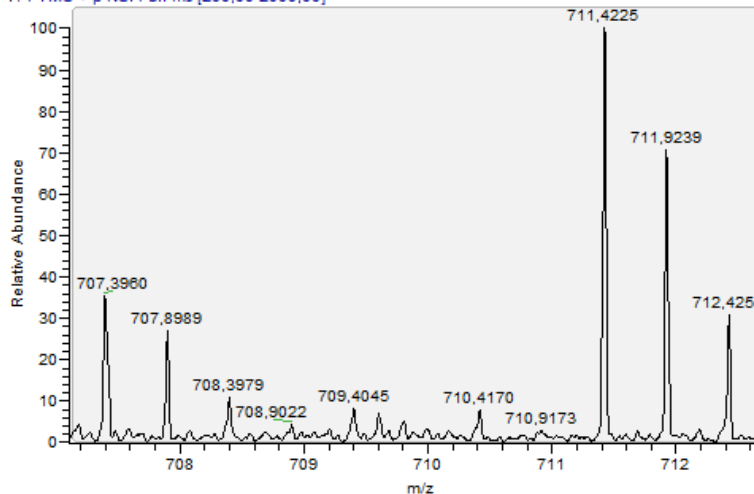

# NDFASAVRILEV 2+

cortex\_03 #14972-15398 RT: 74,47-76,30 AV: 93 NL: 4,34E3

T: FTMS + p NSI Full ms [200,00-2000,00]

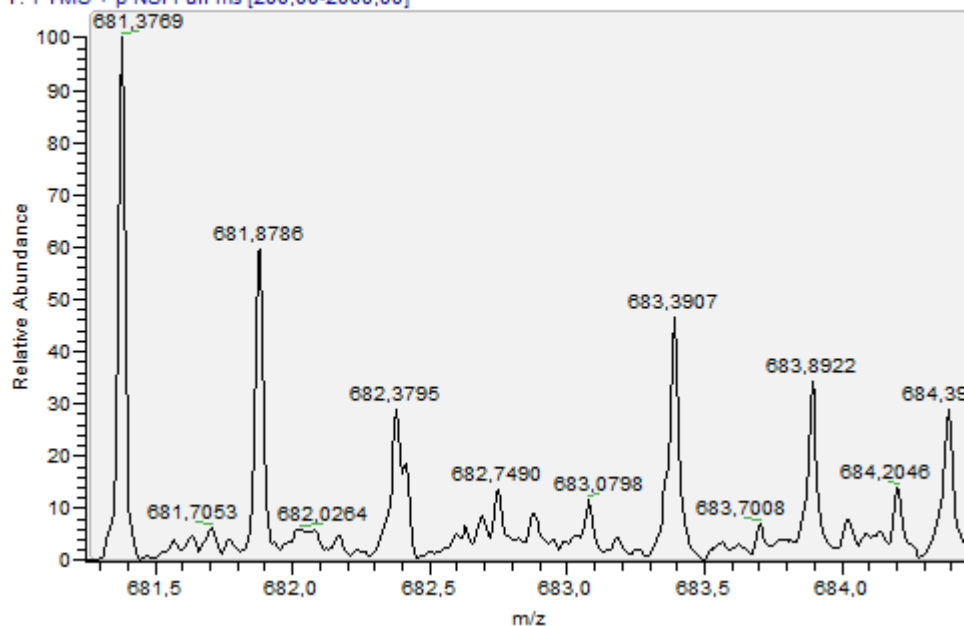

cortex\_04 #13930-14287 RT: 71,87-73,32 AV: 58 NL: 5,38E3

T: FTMS + p NSI Full ms [200,00-2000,00]

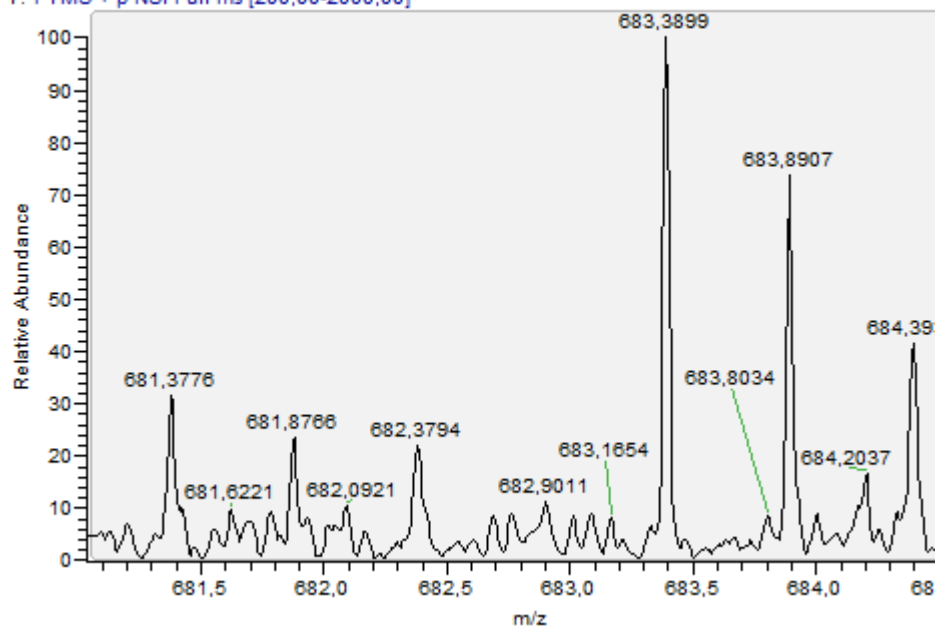



# DGLDPGKLYTL 2+

cortex\_01 #9516 RT: 59.94 AV: 1 NL: 2.80E4  
T: FTMS + p NSI Full ms [200.00-2000.00]

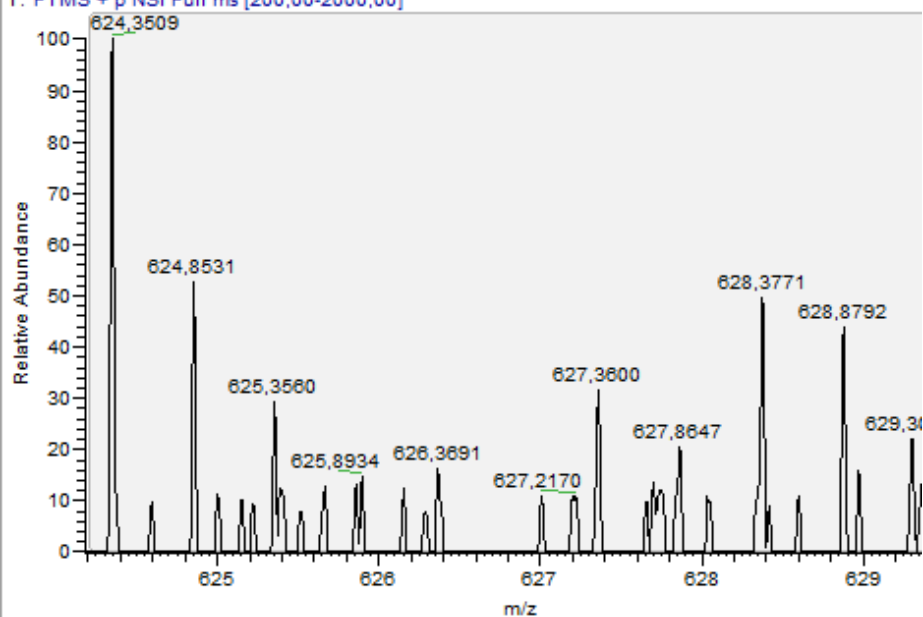

cortex\_03 #12030 RT: 62.46 AV: 1 NL: 3.02E4  
T: FTMS + p NSI Full ms [200.00-2000.00]

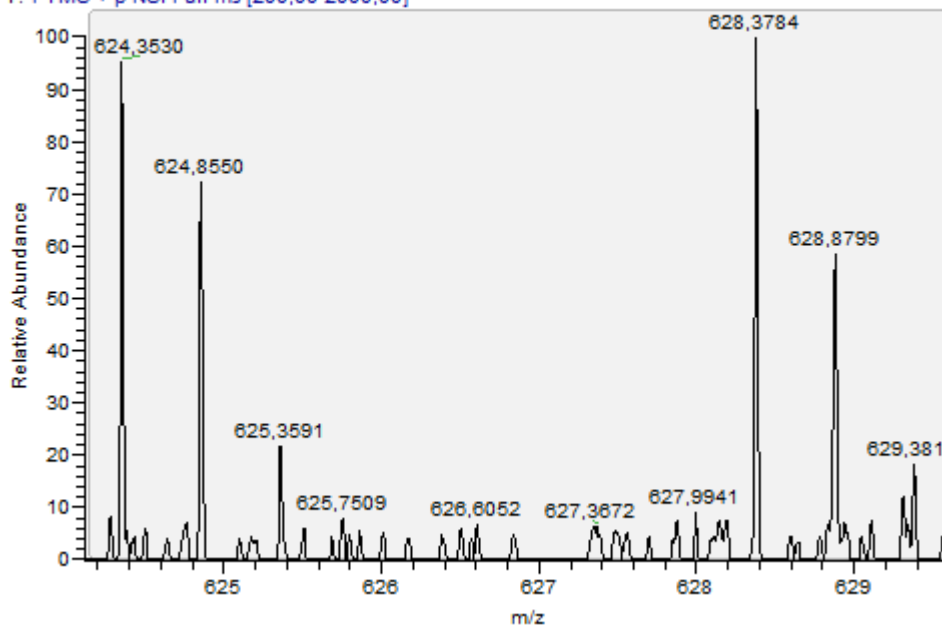

# DDYVPKLYEQLSGK 2+

cortex\_01 #8898-9086 RT: 56,30-57,32 AV: 14 NL: 2,36E4

T: FTMS + p NSI Full ms [200,00-2000,00]

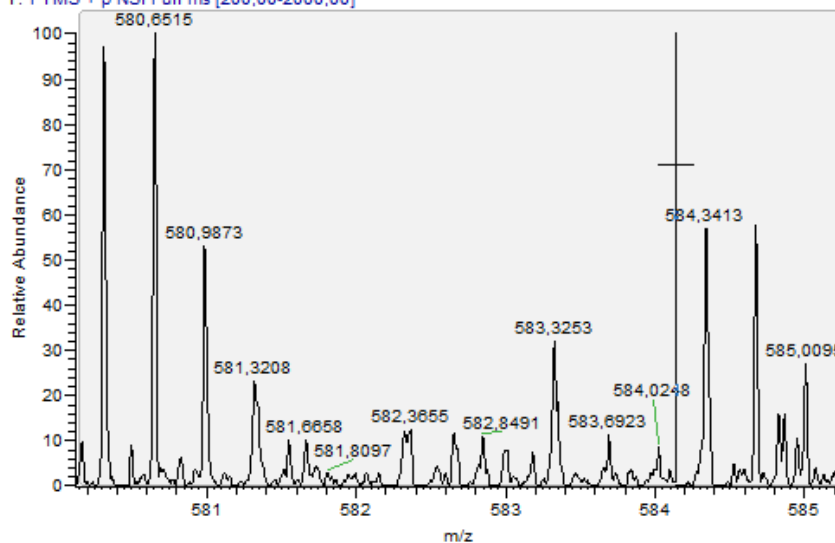

cortex\_03 #11416-11693 RT: 60,01-61,11 AV: 46 NL: 9,17E3

T: FTMS + p NSI Full ms [200,00-2000,00]

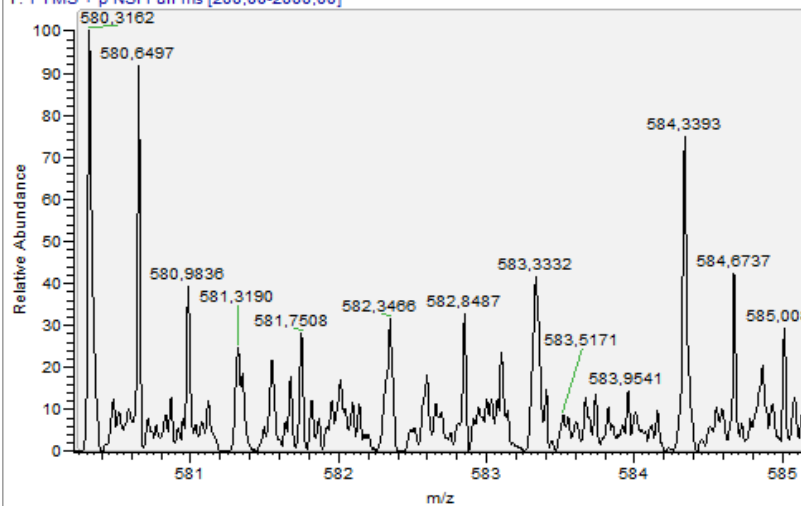

cortex\_04 #11051-11292 RT: 59,63-60,74 AV: 63 NL: 4,72E3

T: FTMS + p NSI Full ms [200,00-2000,00]

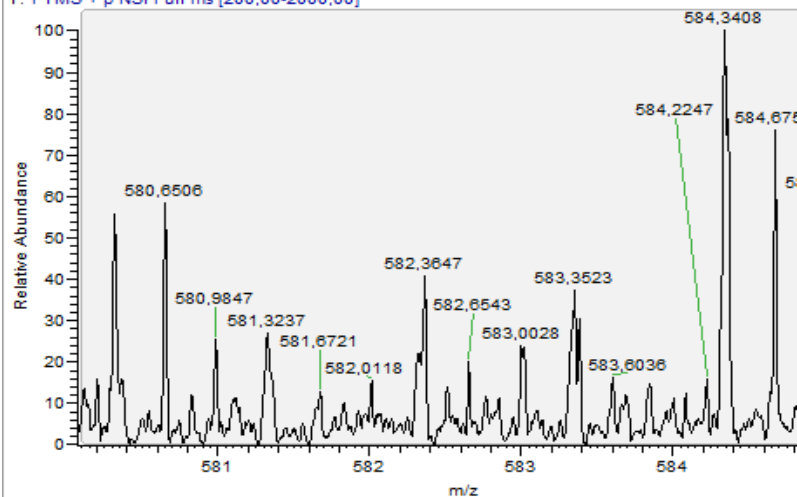

# GRKGPGPGGGAGGARGGAGGGPSGD 4+

estriado\_01 #2140-2258 RT: 17,49-18,10 AV: 7 NL: 7,03E4

T: FTMS + p NSI Full ms [200,00-2000,00]

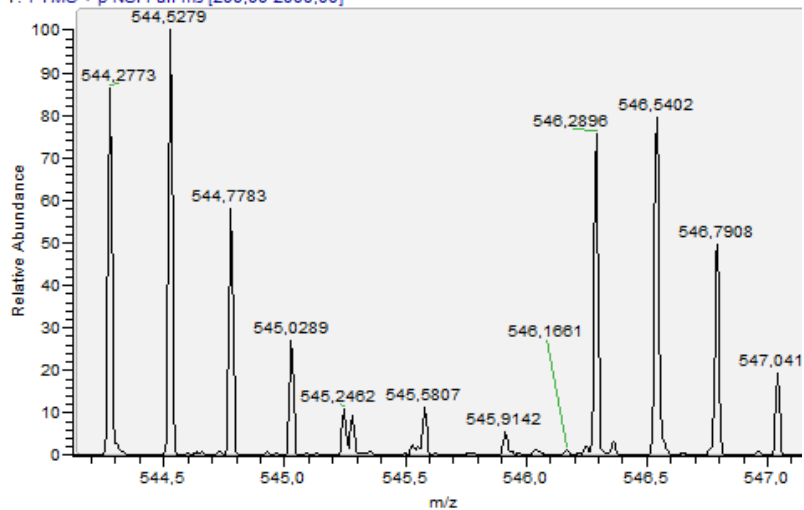

estriado\_02 #2083-2319 RT: 17,04-18,46 AV: 18 NL: 5,14E4

T: FTMS + p NSI Full ms [200,00-2000,00]

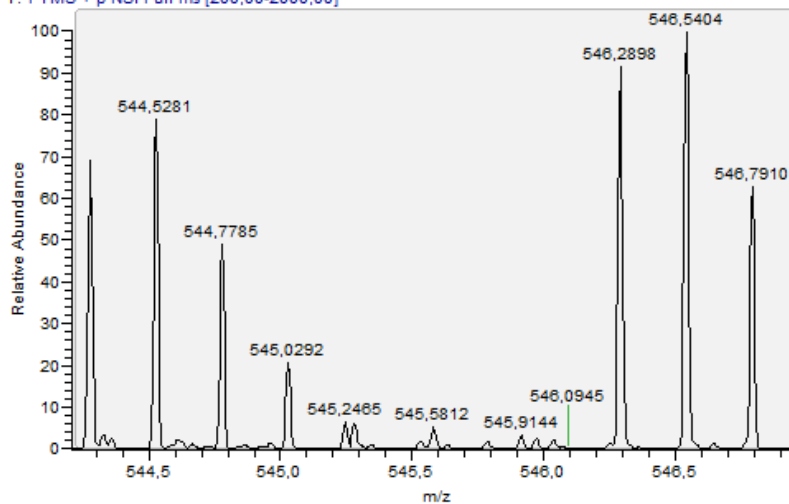

estriado\_04 #3148 RT: 22,10 AV: 1 NL: 7,81E4

T: FTMS + p NSI Full ms [200,00-2000,00]

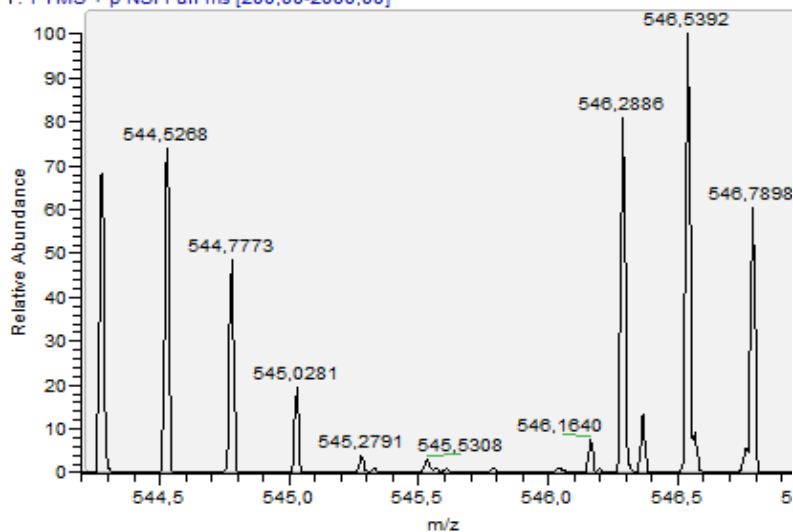

# KGPGPGGPGGAGGARGGAGGGPSGD 3+

estriado\_01 #2444 RT: 19,31 AV: 1 NL: 1,70E5

T: FTMS + p NSI Full ms [200,00-2000,00]

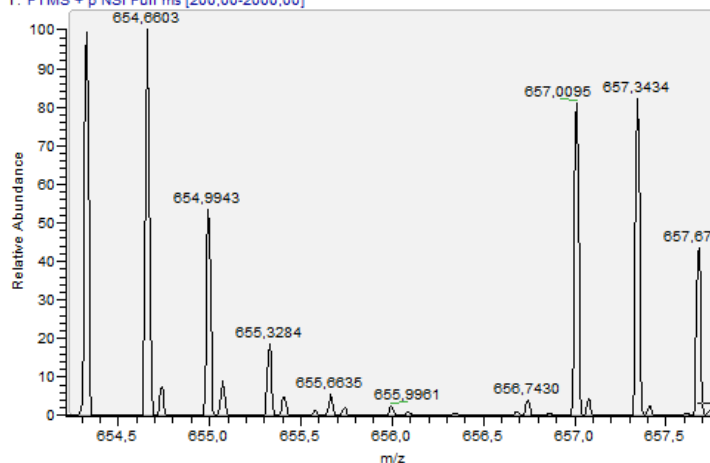

estriado\_02 #2258-2438 RT: 18,24-19,21 AV: 10 NL: 7,63E4

T: FTMS + p NSI Full ms [200,00-2000,00]

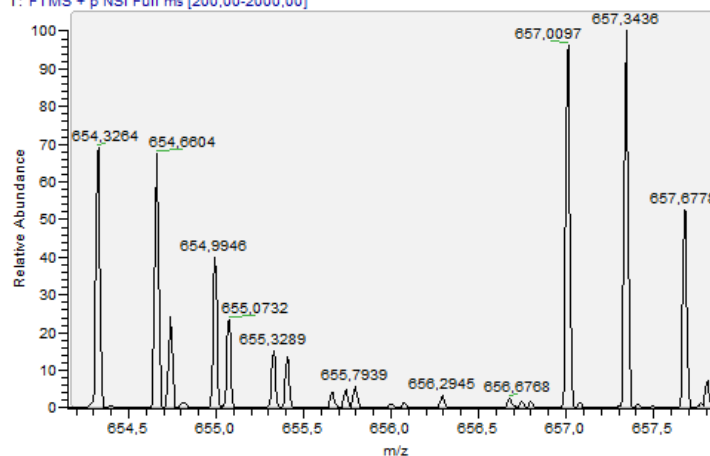

estriado\_04 #3477 RT: 23,33 AV: 1 NL: 1,86E5

T: FTMS + p NSI Full ms [200,00-2000,00]

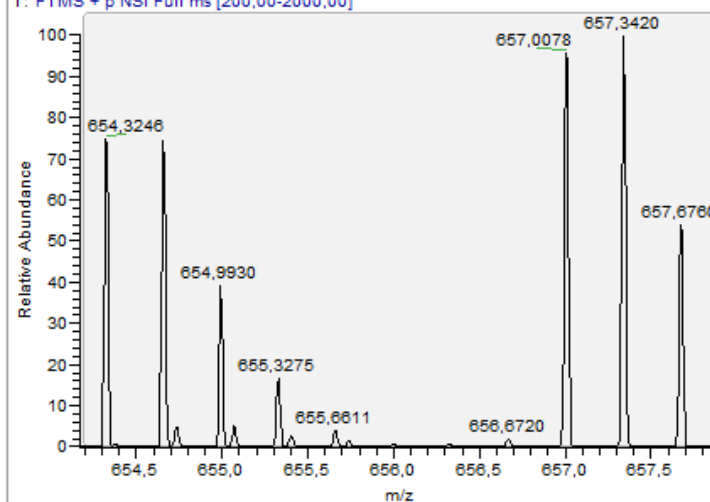

# KGPGPGGPGGAGGARGGAGGGPSGD 2+

estriado\_01 #2444 RT: 19,31 AV: 1 NL: 5,38E3

T: FTMS + p NSI Full ms [200,00-2000,00]

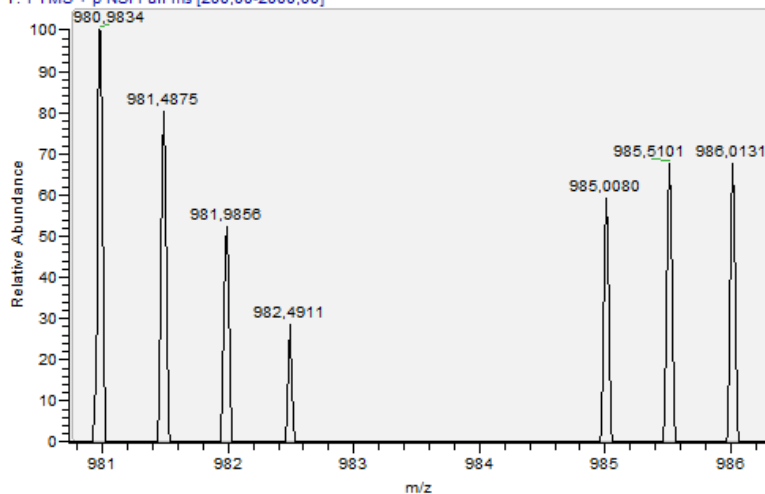

estriado\_02 #2258-2379 RT: 18,24-18,83 AV: 6 NL: 3,13E3

T: FTMS + p NSI Full ms [200,00-2000,00]

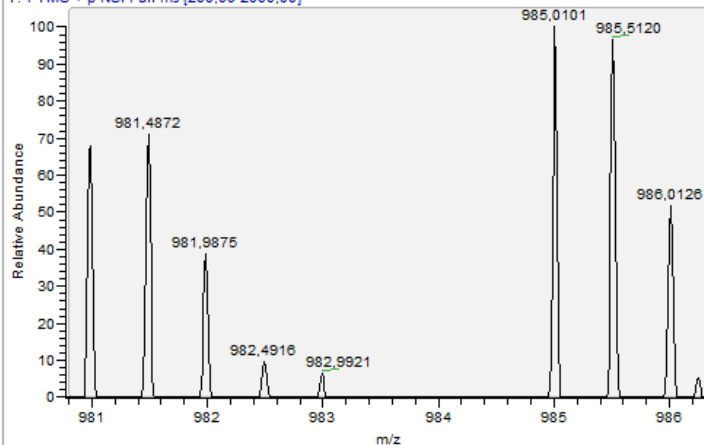

estriado\_04 #3477 RT: 23,33 AV: 1 NL: 5,57E3

T: FTMS + p NSI Full ms [200,00-2000,00]

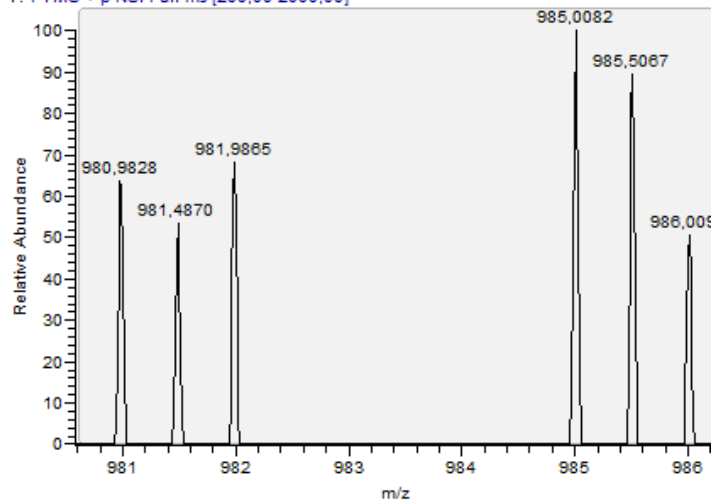

# RKGP GPGGGAGGARGGAGGGPSGD 3+

estriado\_01 #2083-2200 RT: 17,07-17,71 AV: 8 NL: 2,14E4  
T: FTMS + p NSI Full ms [200,00-2000,00]

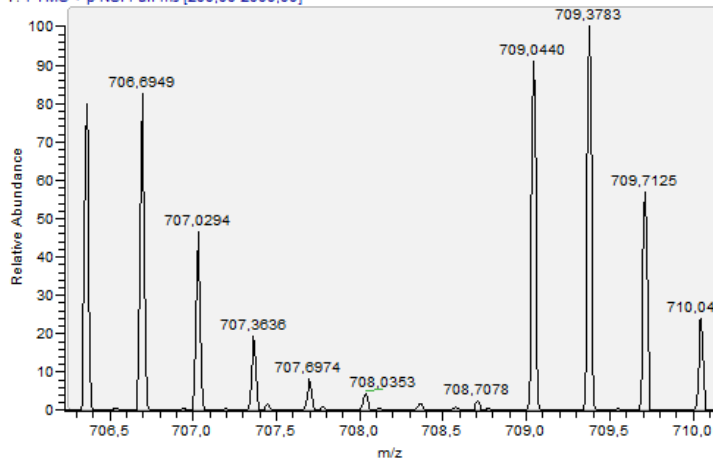

estriado\_02 #1805-2083 RT: 15,19-17,04 AV: 67 NL: 2,94E3  
T: FTMS + p NSI Full ms [200,00-2000,00]

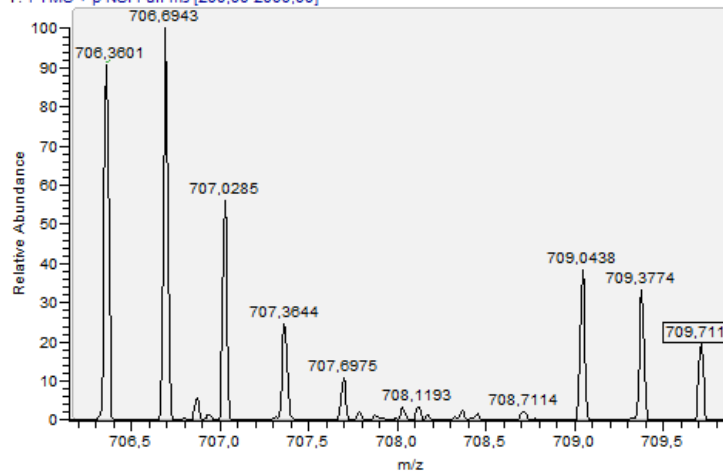

estriado\_04 #3077 RT: 21,84 AV: 1 NL: 2,73E3  
T: FTMS + p NSI Full ms [200,00-2000,00]

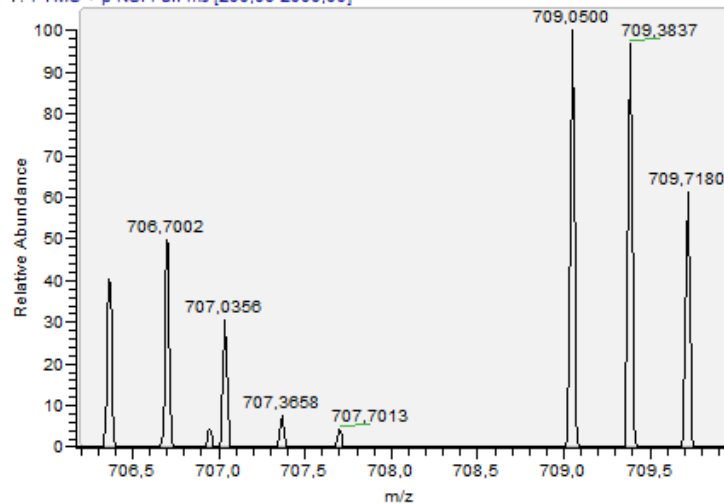

# ATVGDVNTDRPGLLDL 2+

estriado\_01 #9578-9762 RT: 60,85-61,77 AV: 10 NL: 1,61E4  
T: FTMS + p NSI Full ms [200,00-2000,00]

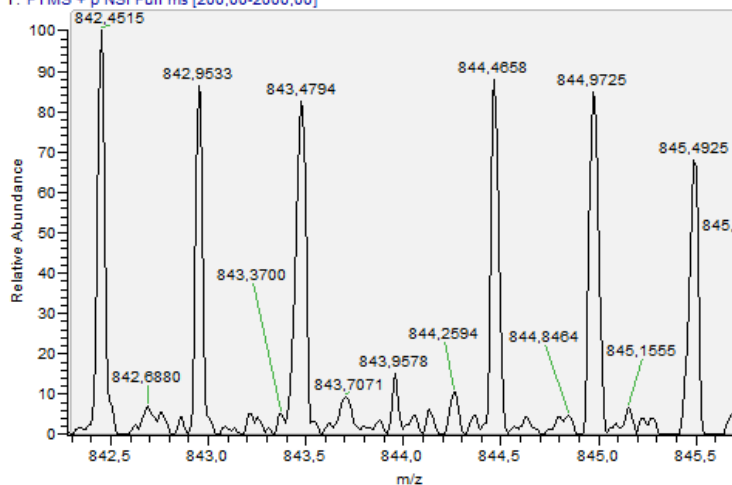

estriado\_02 #9574-9756 RT: 60,76-61,77 AV: 12 NL: 1,74E4  
T: FTMS + p NSI Full ms [200,00-2000,00]

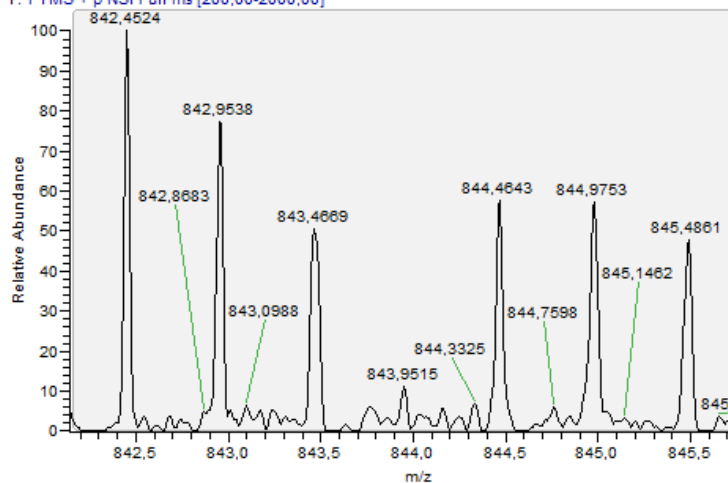

estriado\_04 #14445-14505 RT: 64,72-64,93 AV: 10 NL: 1,09E4  
T: FTMS + p NSI Full ms [200,00-2000,00]

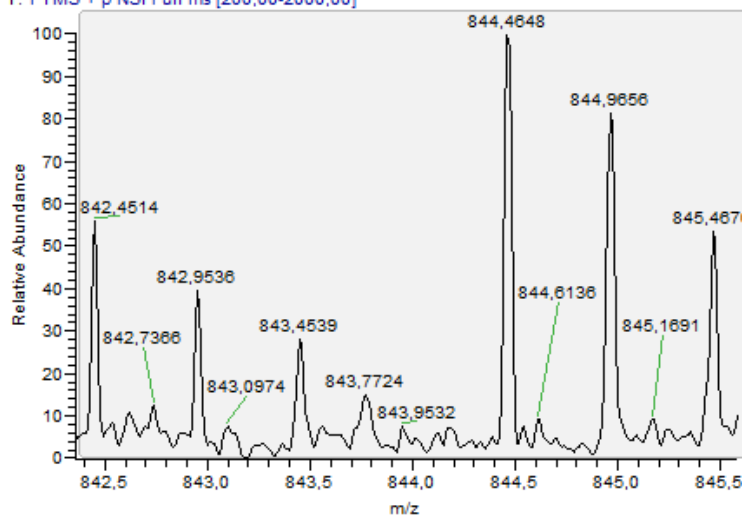

# KQATVGDVNTDRPGLLDL 2+

estriado\_01 #8025-8149 RT: 51.52-52.16 AV: 9 NL: 5.90E4  
T: FTMS + p NSI Full ms [200.00-2000.00]

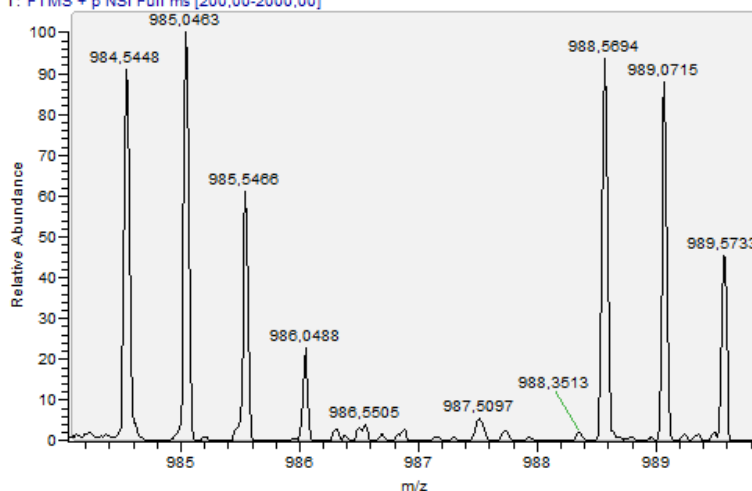

estriado\_02 #8224-8348 RT: 52.66-53.29 AV: 13 NL: 3.42E4  
T: FTMS + p NSI Full ms [200.00-2000.00]

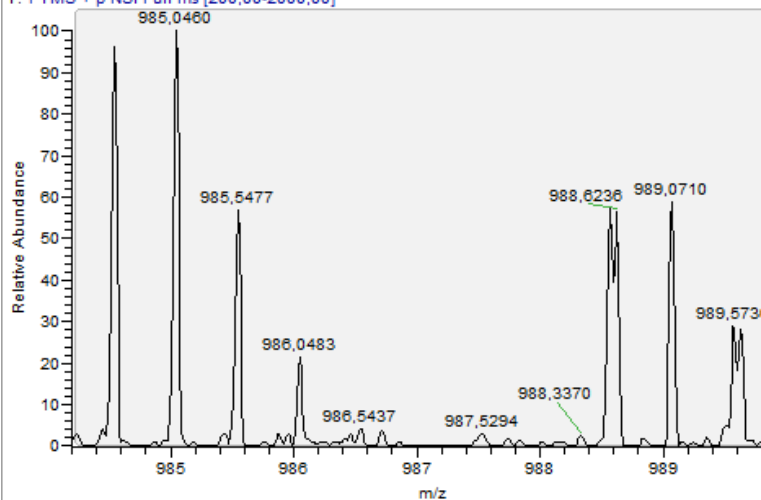

estriado\_04 #12661-12788 RT: 57.50-57.99 AV: 19 NL: 2.82E4  
T: FTMS + p NSI Full ms [200.00-2000.00]

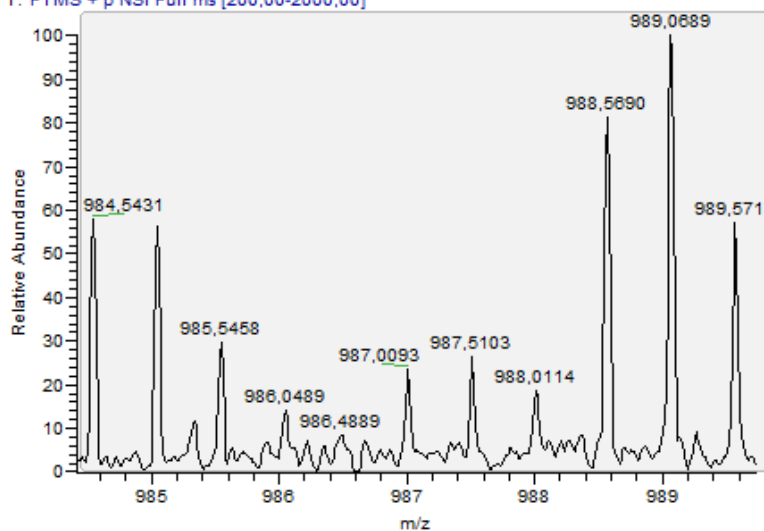



# KQATVGDVNTDRPGLLDL 3+

estriado\_01 #8025-8211 RT: 51,52-52,54 AV: 13 NL: 2,55E5  
T: FTMS + p NSI Full ms [200,00-2000,00]

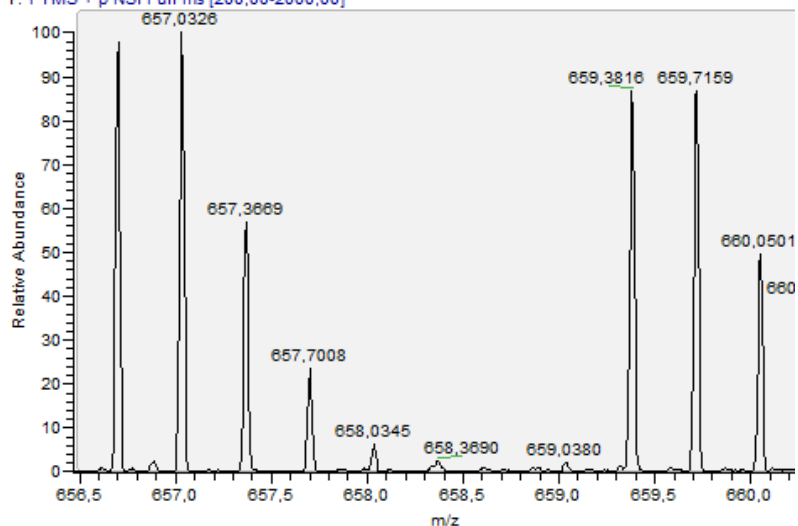

estriado\_02 #8224-8348 RT: 52,66-53,29 AV: 13 NL: 1,62E5  
T: FTMS + p NSI Full ms [200,00-2000,00]

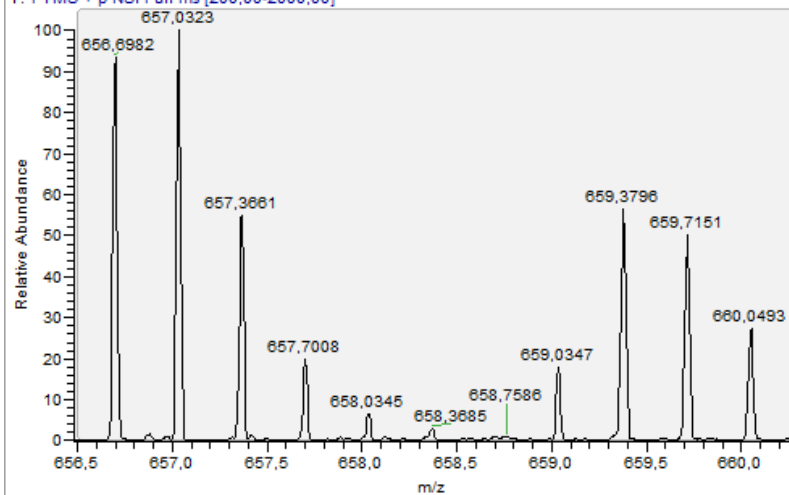

estriado\_04 #12704 RT: 57,66 AV: 1 NL: 1,11E5  
T: FTMS + p NSI Full ms [200,00-2000,00]

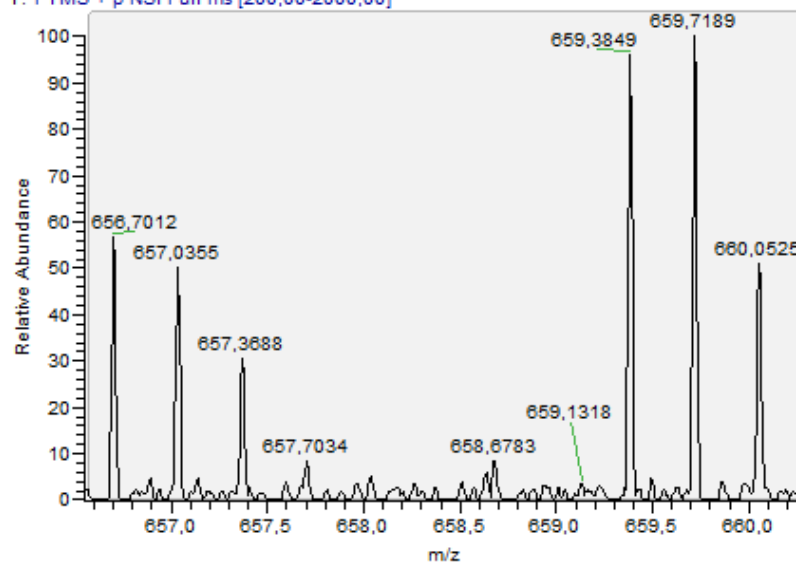

# SHFKQATVGDVNTDRPGLLDL 2+

estriado\_01 #7900-8086 RT: 50,77-51,77 AV: 14 NL: 5,39E3

T: FTMS + p NSI Full ms [200,00-2000,00]

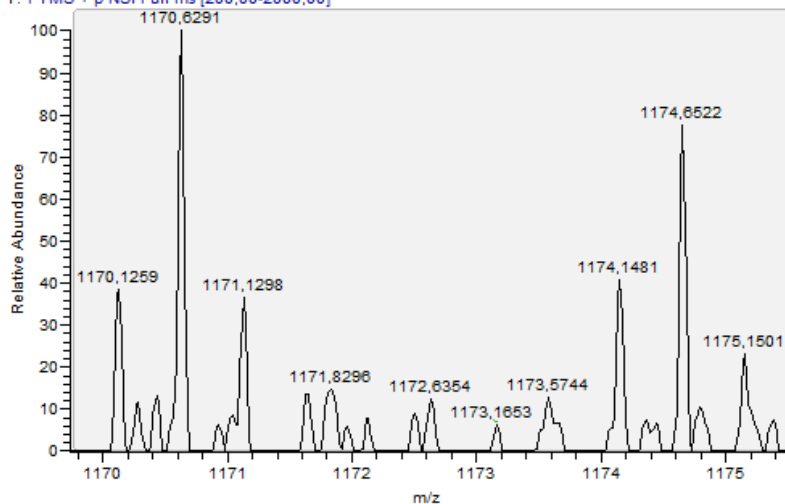

estriado\_02 #7849-8224 RT: 50,38-52,54 AV: 32 NL: 2,76E3

T: FTMS + p NSI Full ms [200,00-2000,00]

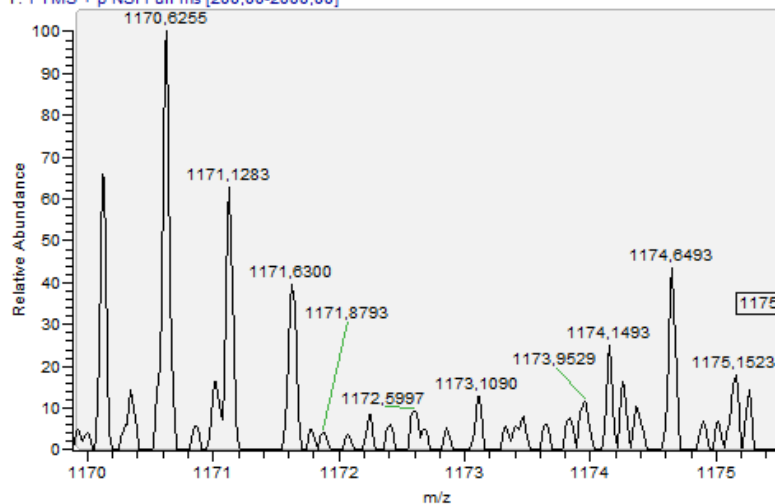

estriado\_04 #12449 RT: 56,65 AV: 1 NL: 6,21E2

T: FTMS + p NSI Full ms [200,00-2000,00]

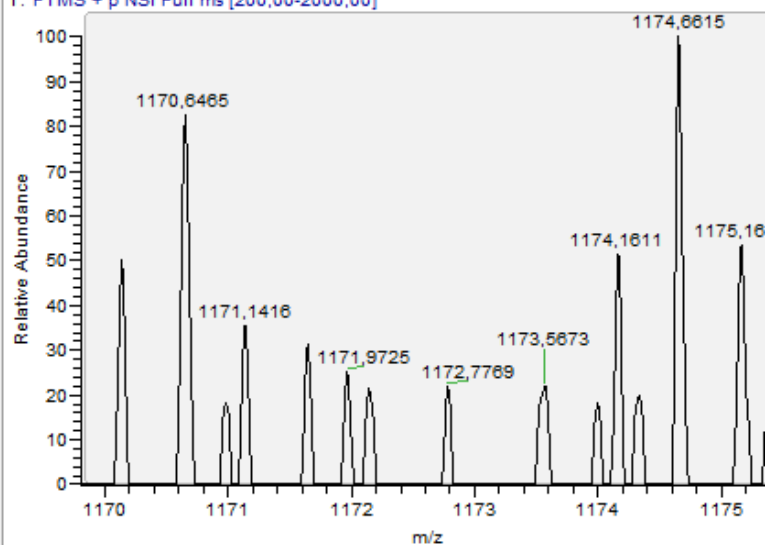

# TVGDVNTDRPGLLDL 2+

estriado\_01 #9394-9517 RT: 59,66-60,34 AV: 14 NL: 1,39E5  
T: FTMS + p NSI Full ms [200,00-2000,00]

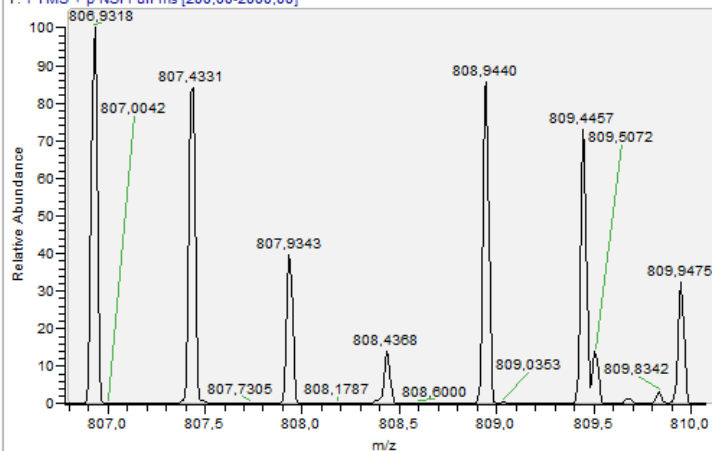

estriado\_02 #9326-9695 RT: 59,26-61,35 AV: 25 NL: 9,87E4  
T: FTMS + p NSI Full ms [200,00-2000,00]

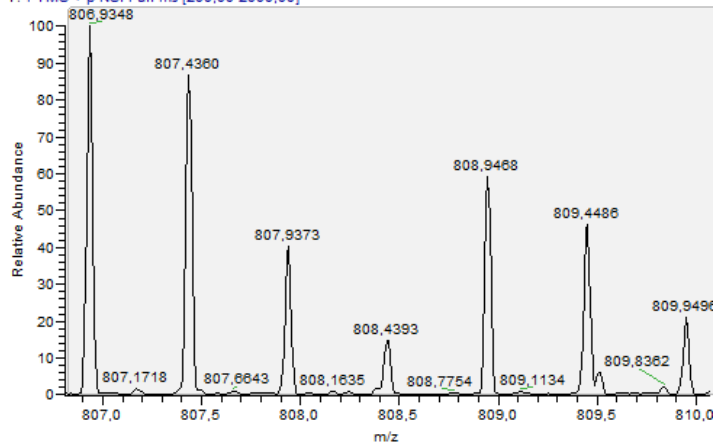

estriado\_04 #14214-14653 RT: 63,78-65,50 AV: 64 NL: 3,55E4  
T: FTMS + p NSI Full ms [200,00-2000,00]

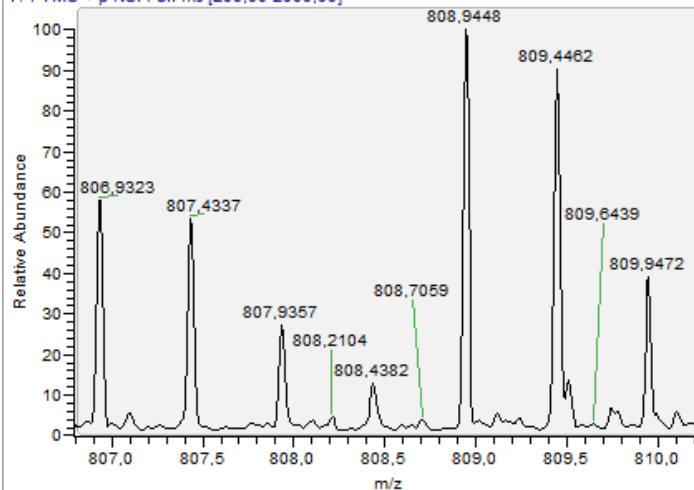

# VEKVDLKKKYGI 3+

estriado\_01 #5439-5568 RT: 36,33-37,04 AV: 8 NL: 3,62E5  
T: FTMS + p NSI Full ms [200,00-2000,00]

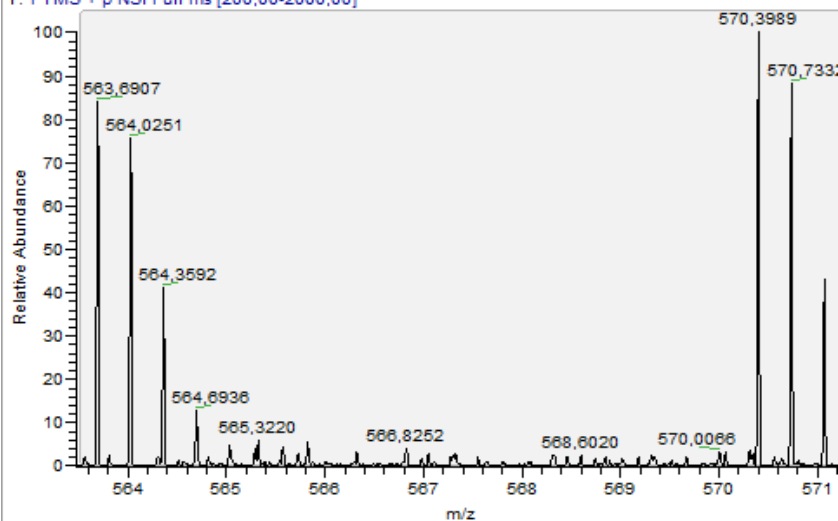

estriado\_02 #5449-5581 RT: 36,36-36,98 AV: 7 NL: 2,85E5  
T: FTMS + p NSI Full ms [200,00-2000,00]

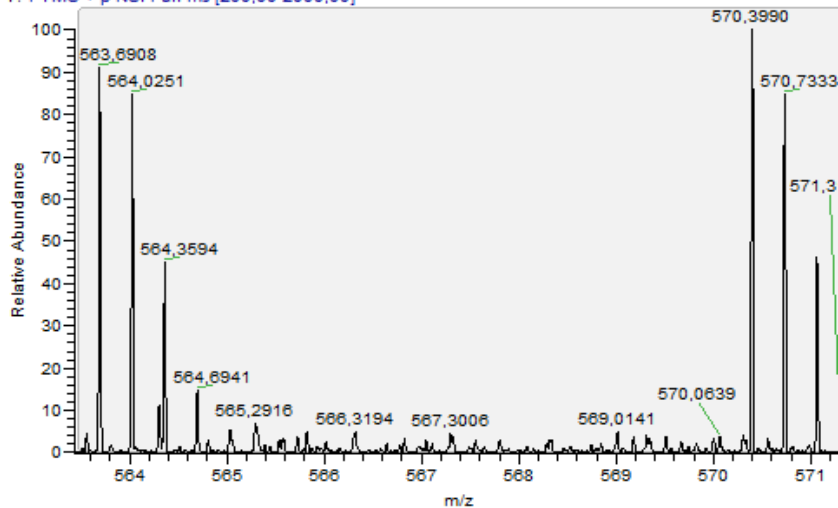

estriado\_04 #8392-8502 RT: 41,26-41,62 AV: 13 NL: 8,13E4  
T: FTMS + p NSI Full ms [200,00-2000,00]

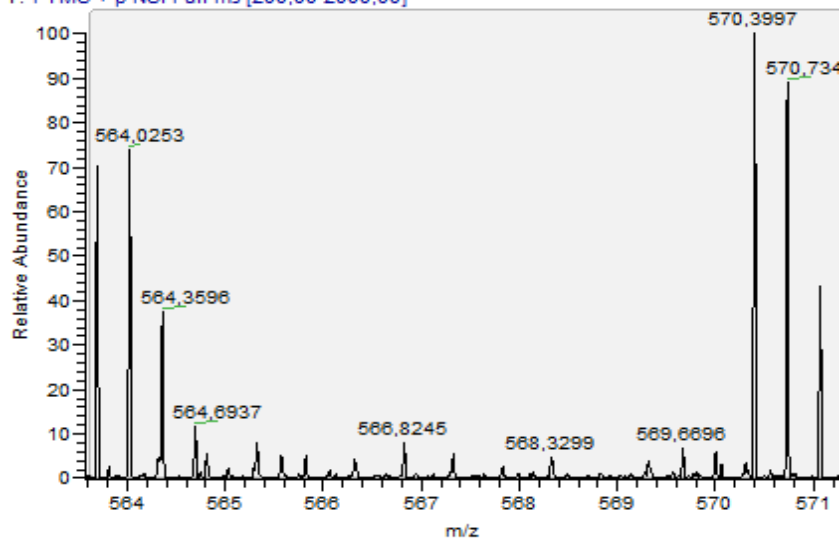

# KGNDISSGTVLSDYVGSGPPSGTGL 2+

estriado\_01 #9639-9762 RT: 61,14-61,77 AV: 7 NL: 9,00E3

T: FTMS + p NSI Full ms [200,00-2000,00]

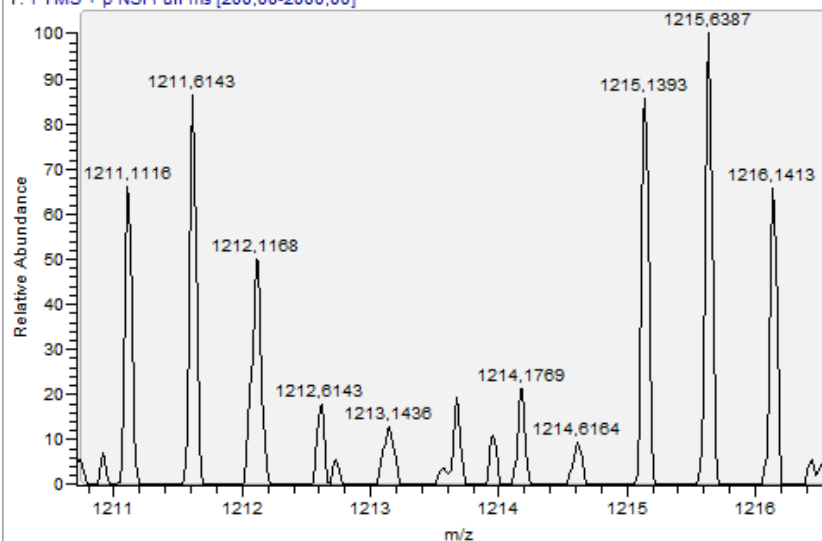

estriado\_02 #9512-9756 RT: 60,37-61,77 AV: 17 NL: 3,67E3

T: FTMS + p NSI Full ms [200,00-2000,00]

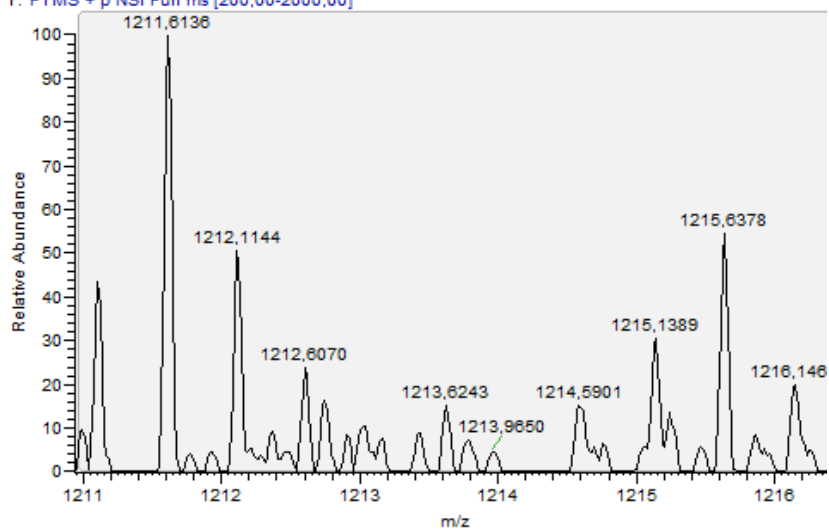

# AGVTVDDELGKVL 2+

estriado\_01 #9517-9762 RT: 60.41-61.77 AV: 14 NL: 1,21E4

T: FTMS + p NSI Full ms [200,00-2000,00]

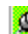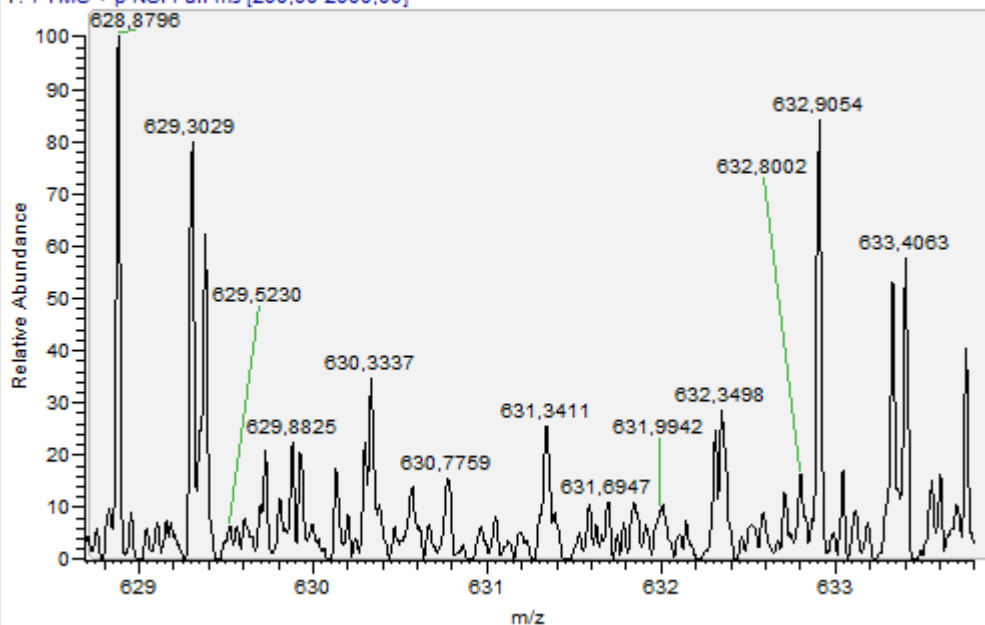

estriado\_02 #9574-9756 RT: 60.76-61.77 AV: 12 NL: 1,35E4

T: FTMS + p NSI Full ms [200,00-2000,00]

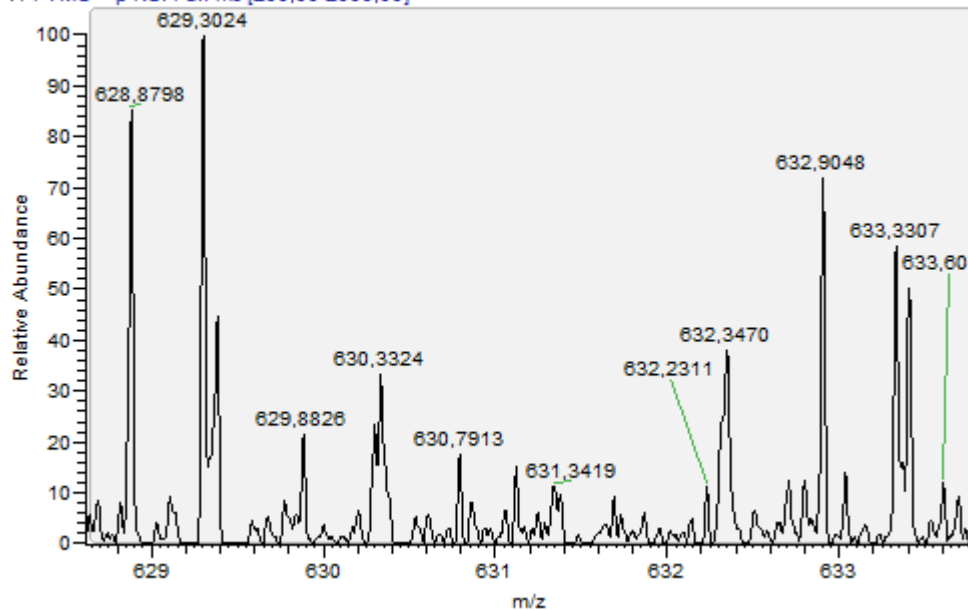

# GVTVDELGKVLTPQV 2+

estriado\_01 #10132-10307 RT: 64,16-65,15 AV: 14 NL: 2,26E4  
T: FTMS + p NSI Full ms [200,00-2000,00]

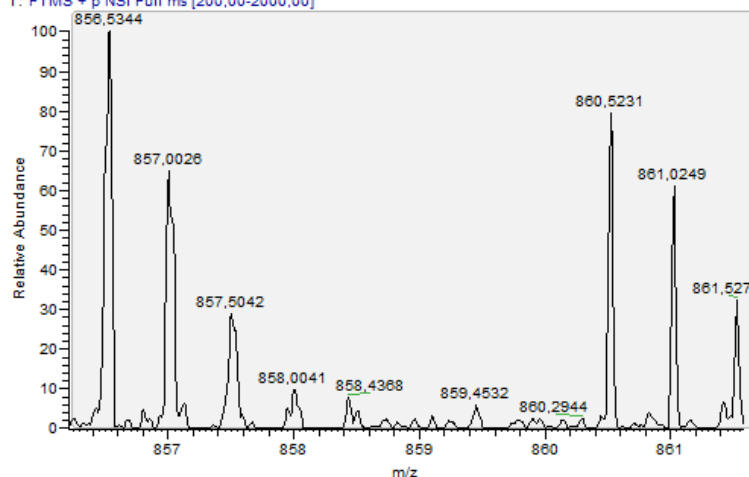

estriado\_02 #10182-10424 RT: 64,49-65,89 AV: 19 NL: 2,77E4  
T: FTMS + p NSI Full ms [200,00-2000,00]

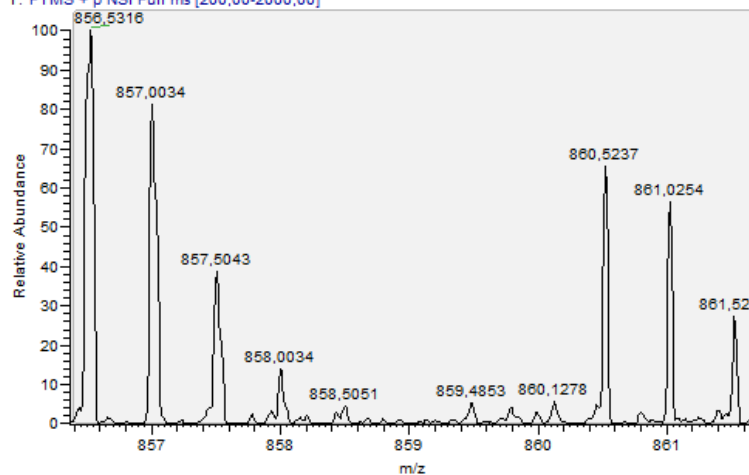

estriado\_04 #14862-14947 RT: 66,44-66,70 AV: 11 NL: 1,60E4  
T: FTMS + p NSI Full ms [200,00-2000,00]

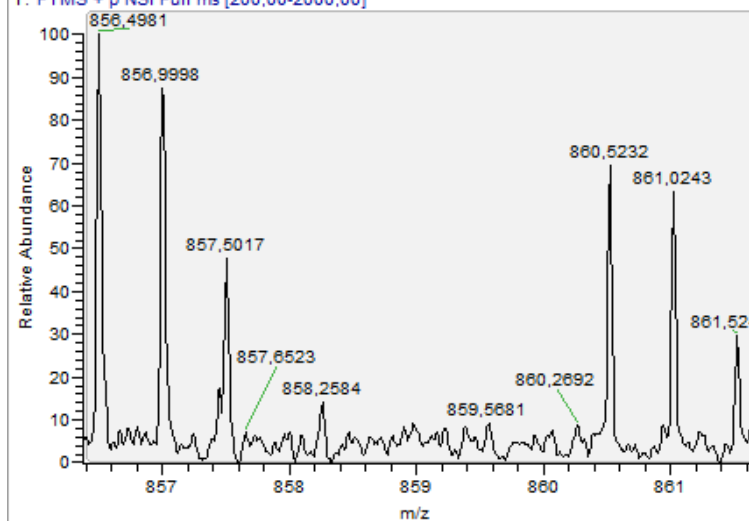

# DDYVPKLYEQLSGK 2+

estriado\_01 #8896-9083 RT: 56,69-57,78 AV: 20 NL: 2,24E4  
T: FTMS + p NSI Full ms [200,00-2000,00]

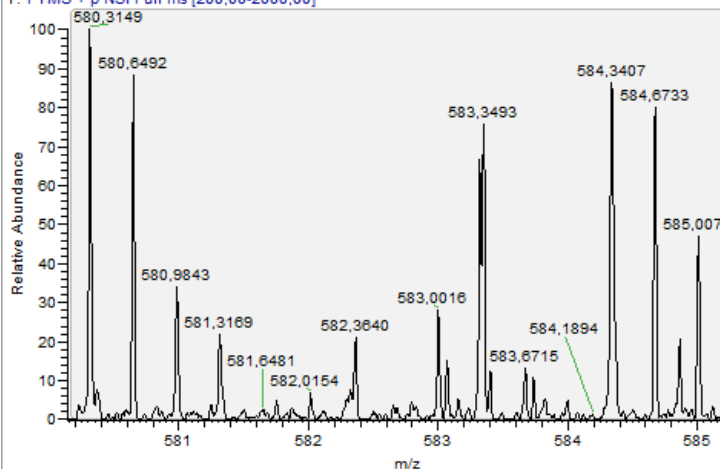

estriado\_02 #8901-9081 RT: 56,70-57,73 AV: 26 NL: 2,24E4  
T: FTMS + p NSI Full ms [200,00-2000,00]

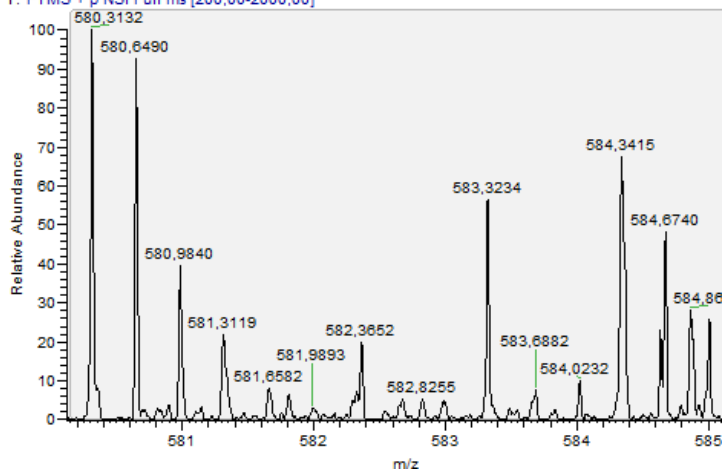

estriado\_04 #13457-13566 RT: 60,71-61,09 AV: 14 NL: 8,18E3  
T: FTMS + p NSI Full ms [200,00-2000,00]

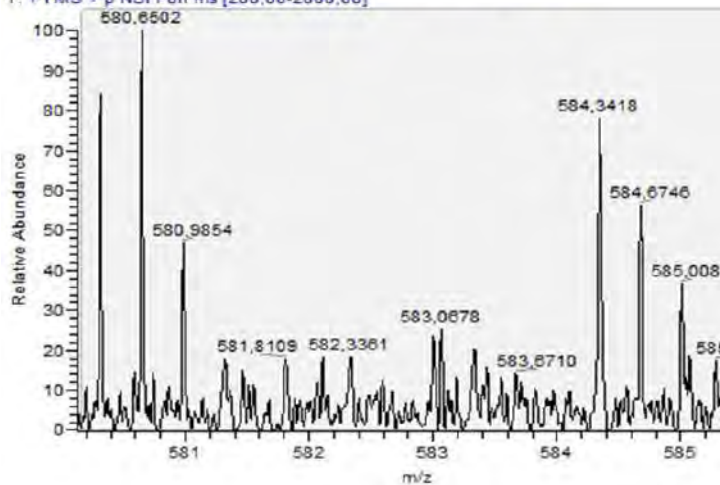



# AGVTVDELGKVLTPQV 2+

estriado\_01 #10373-10493 RT: 65,62-66,19 AV: 10 NL: 5,25E4  
T: FTMS + p NSI Full ms [200,00-2000,00]

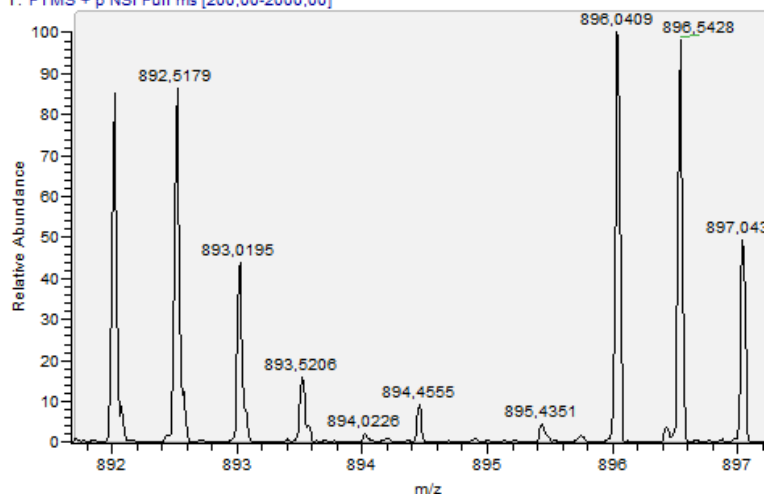

estriado\_02 #10364-10545 RT: 65,59-66,64 AV: 15 NL: 4,52E4  
T: FTMS + p NSI Full ms [200,00-2000,00]

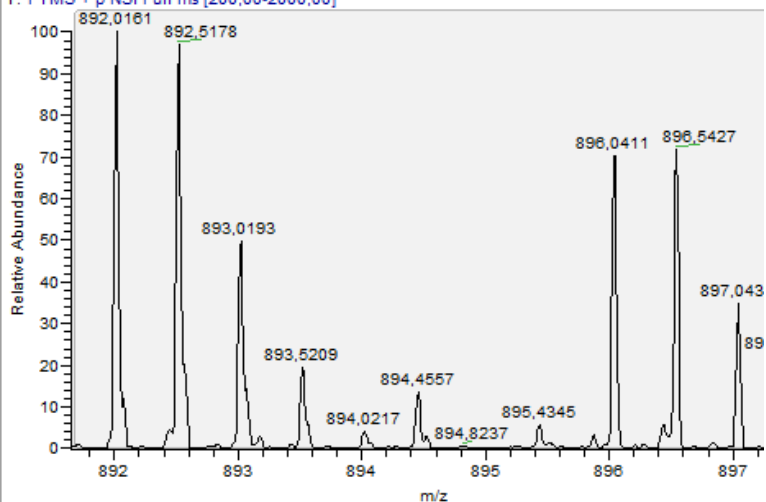

estriado\_04 #14978-15417 RT: 66,86-68,60 AV: 59 NL: 5,31E3  
T: FTMS + p NSI Full ms [200,00-2000,00]

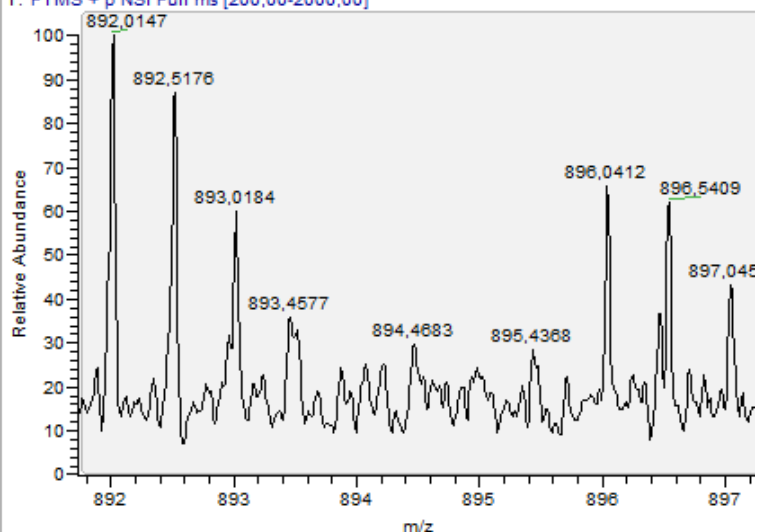

# ADDEPLGRVSF 2+

estriado\_01 #7588-7837 RT: 48,95-50,35 AV: 27 NL: 7,75E4  
T: FTMS + p NSI Full ms [200,00-2000,00]

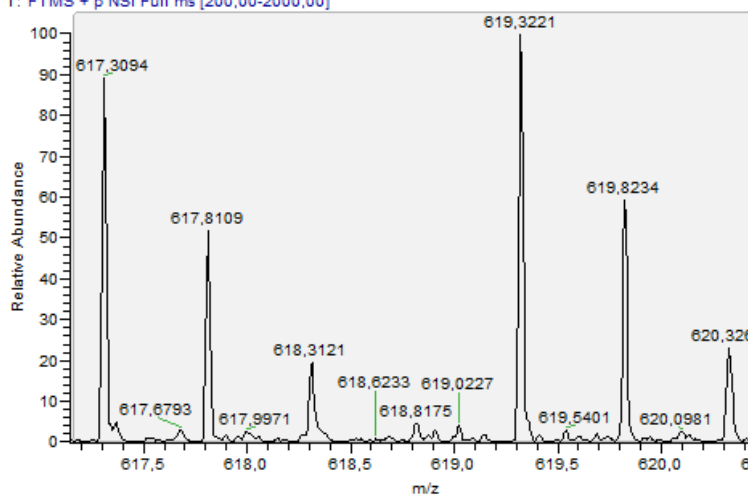

estriado\_02 #7666-7849 RT: 49,31-50,25 AV: 20 NL: 9,27E4  
T: FTMS + p NSI Full ms [200,00-2000,00]

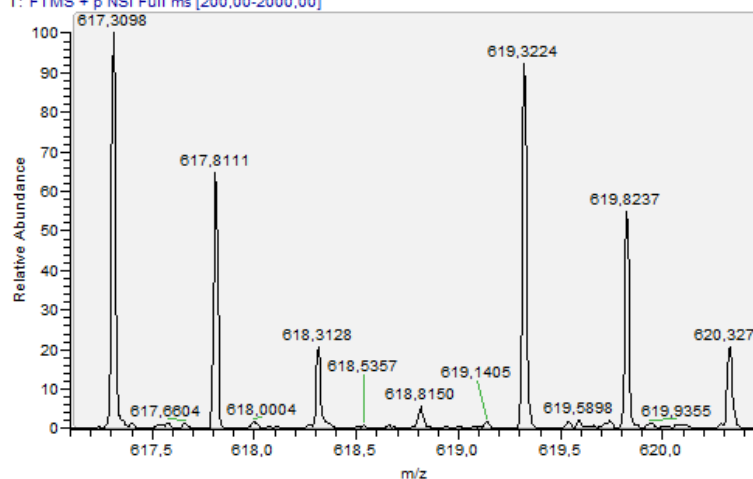

estriado\_04 #12033-12469 RT: 55,00-56,73 AV: 61 NL: 8,21E3  
T: FTMS + p NSI Full ms [200,00-2000,00]

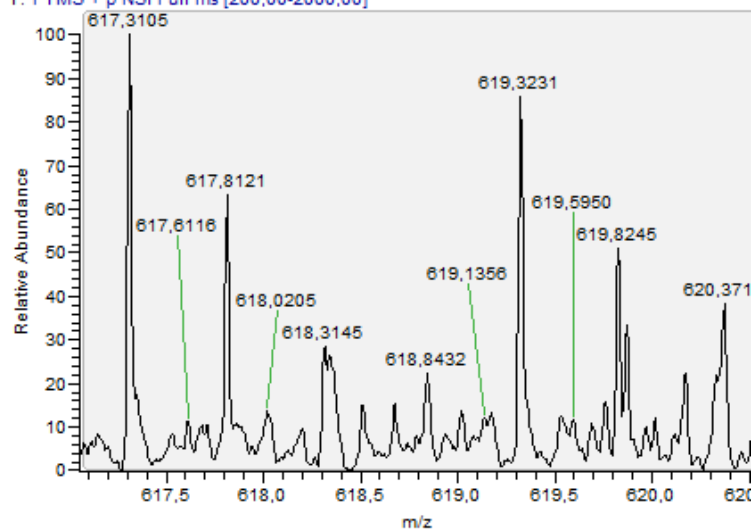

# ADKVPKTAENFRAL 2+

estriado\_01 #4913-5113 RT: 33,37-34,38 AV: 14 NL: 1,50E5  
T: FTMS + p NSI Full ms [200,00-2000,00]

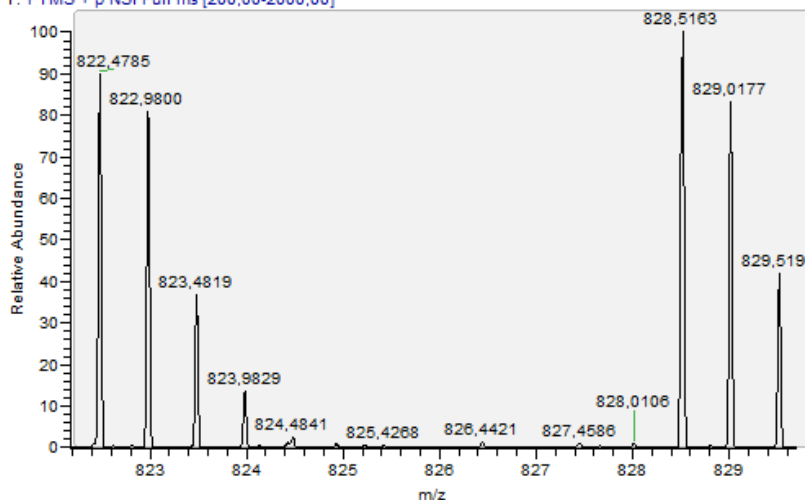

estriado\_02 #4852-5122 RT: 33,07-34,42 AV: 16 NL: 1,17E5  
T: FTMS + p NSI Full ms [200,00-2000,00]

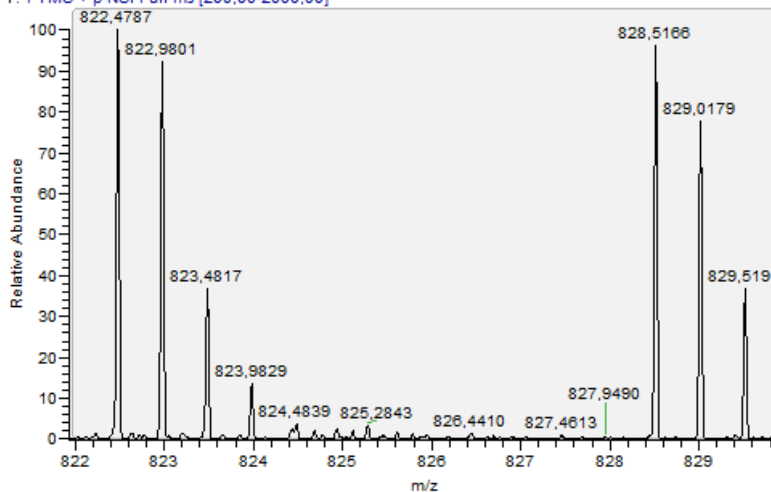

estriado\_04 #7486-7943 RT: 37,85-39,57 AV: 67 NL: 1,48E4  
T: FTMS + p NSI Full ms [200,00-2000,00]

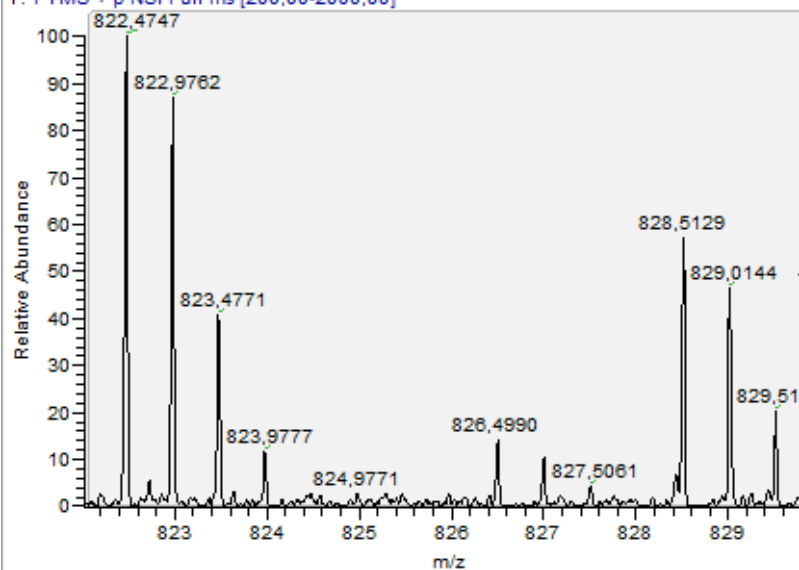

# ADKVPKTAENFR 3+

estriado\_01 #3239 RT: 24,05 AV: 1 NL: 2,32E5  
T: FTMS + p NSI Full ms [200,00-2000,00]

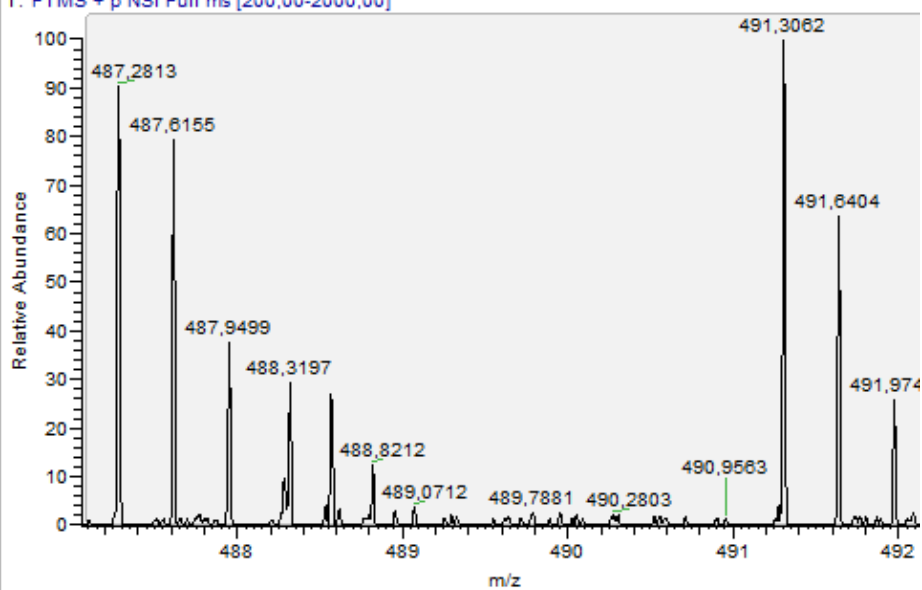

estriado\_02 #3058-3318 RT: 23,04-24,36 AV: 12 NL: 6,68E4  
T: FTMS + p NSI Full ms [200,00-2000,00]

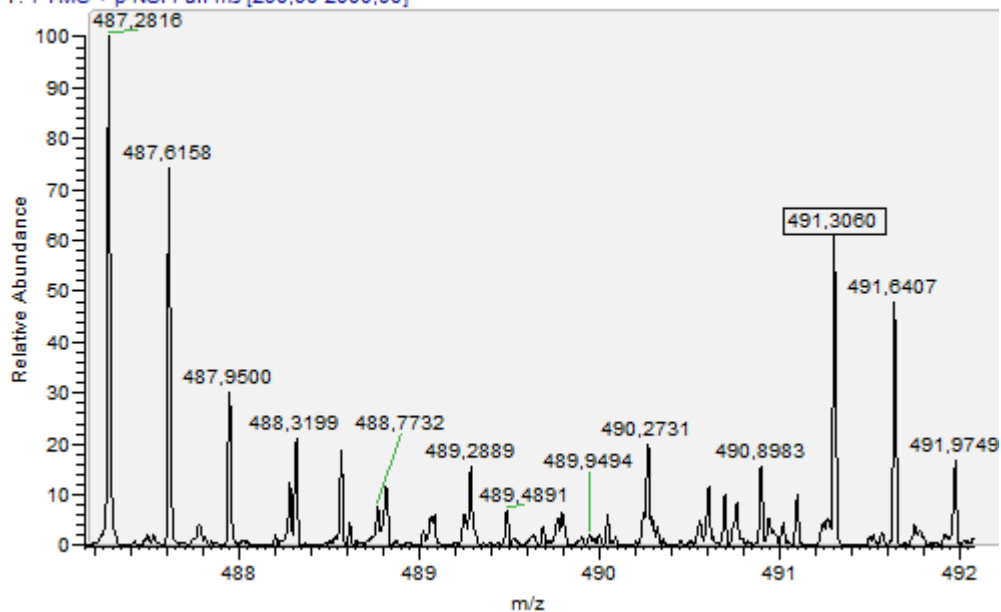

# ELFADKVPKTAENF 2+

estriado\_01 #7511 RT: 48.43 AV: 1 NL: 3,04E4

T: FTMS + p NSI Full ms [200,00-2000,00]

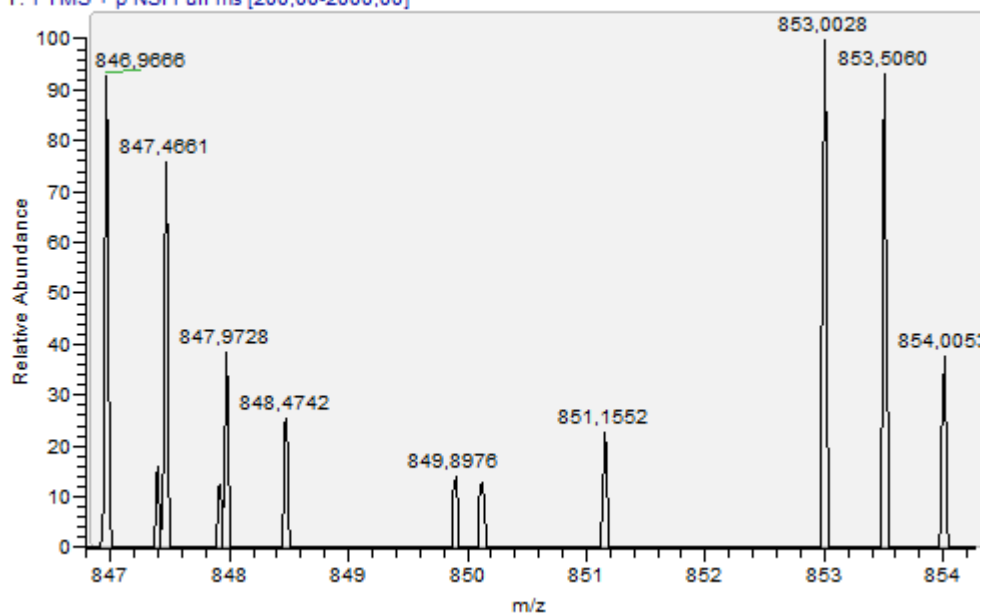

estriado\_02 #7478-7603 RT: 48.17-48.89 AV: 10 NL: 3,16E4

T: FTMS + p NSI Full ms [200,00-2000,00]

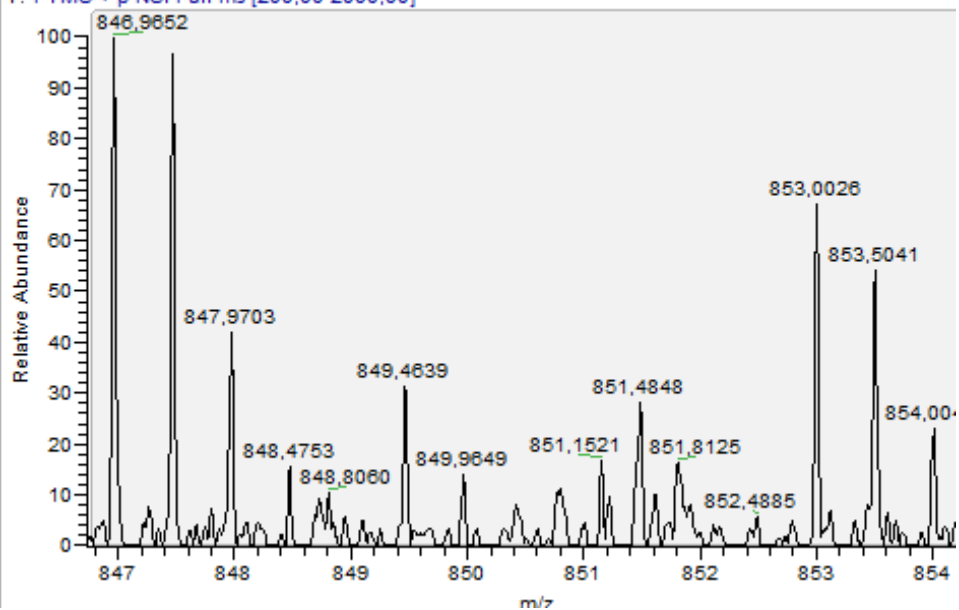

# ASAPLVETSTPLRL 2+

estriado\_01 #9083-9145 RT: 57,78-58,11 AV: 5 NL: 2,75E4

T: FTMS + p NSI Full ms [200,00-2000,00]

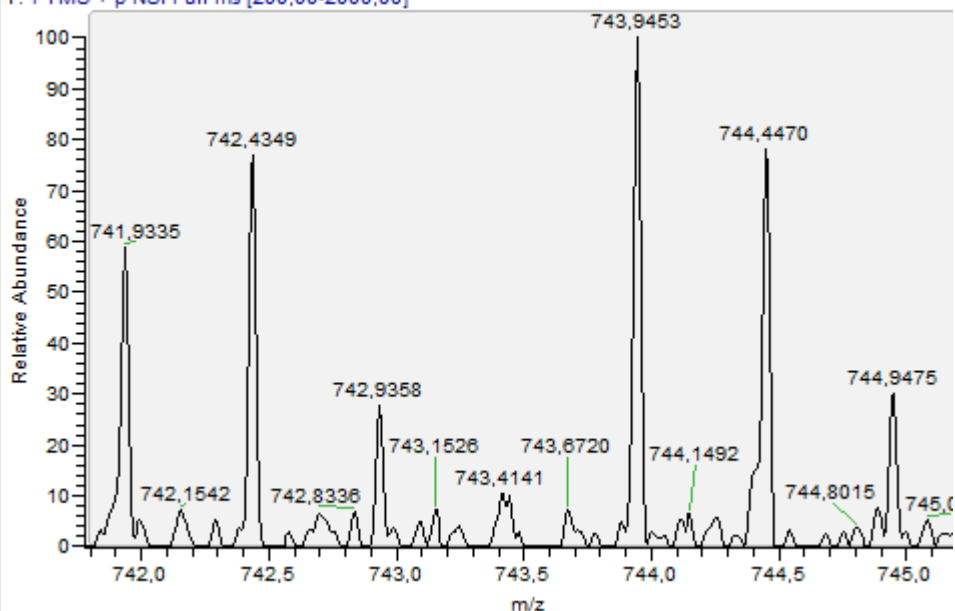

estriado\_02 #9176-9204 RT: 58,36-58,46 AV: 3 NL: 2,09E4

T: FTMS + p NSI Full ms [200,00-2000,00]

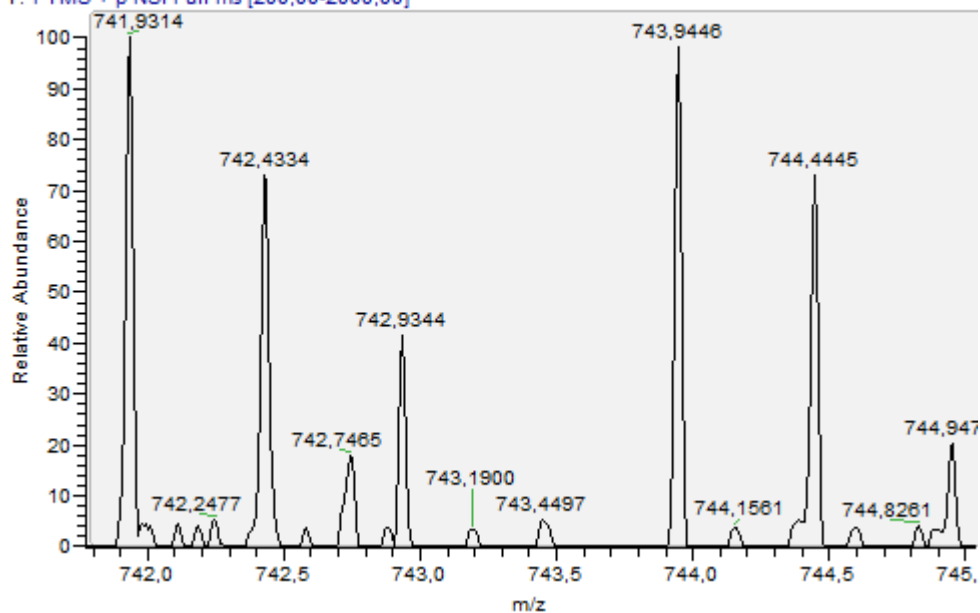

# SLSAASAPLVETSTPLRL 2+

estriado\_01 #10373-10493 RT: 65,62-66,19 AV: 10 NL: 6,51E4  
T: FTMS + p NSI Full ms [200,00-2000,00]

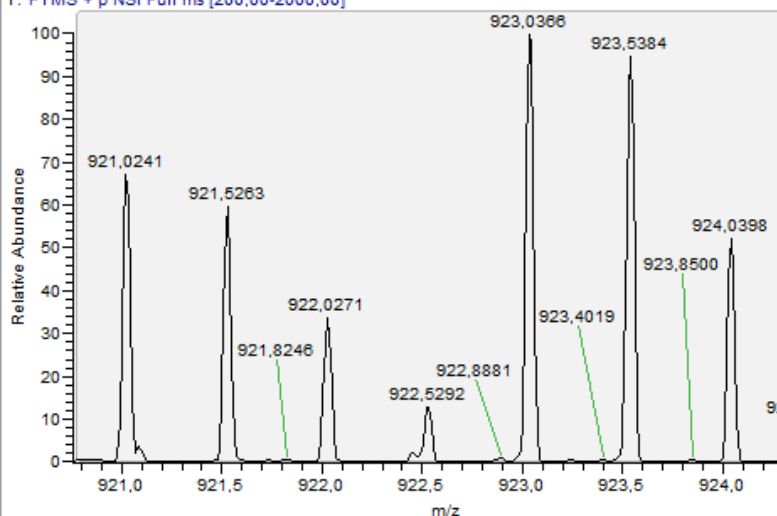

estriado\_02 #10364-10605 RT: 65,59-67,04 AV: 19 NL: 3,74E4  
T: FTMS + p NSI Full ms [200,00-2000,00]

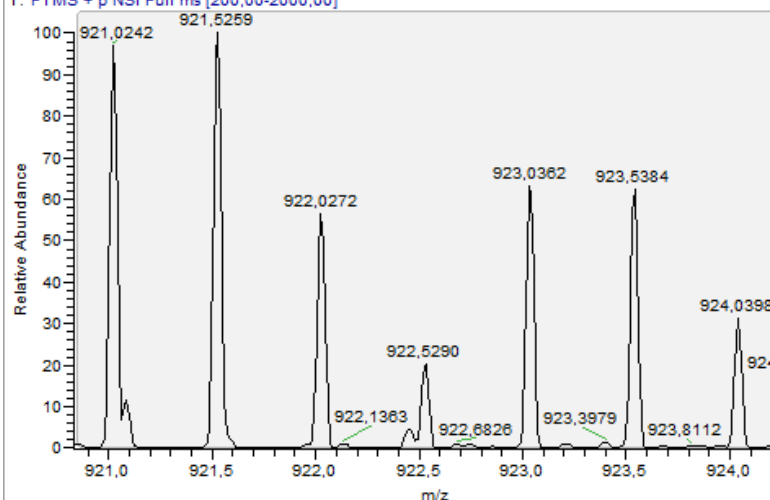

estriado\_04 #15024-15300 RT: 67,04-68,13 AV: 38 NL: 1,60E4  
T: FTMS + p NSI Full ms [200,00-2000,00]

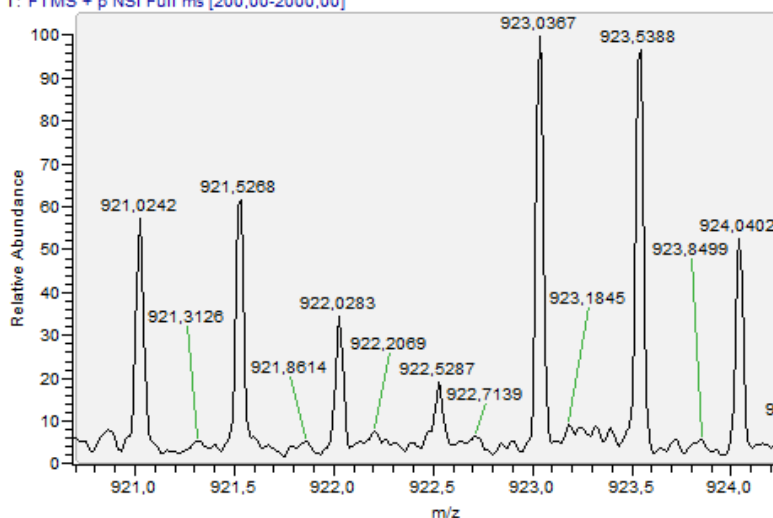

# SANSNPAMAPRE 2+

estriado\_01 #2799-3052 RT: 21,66-22,87 AV: 12 NL: 1,61E5  
T: FTMS + p NSI Full ms [200,00-2000,00]

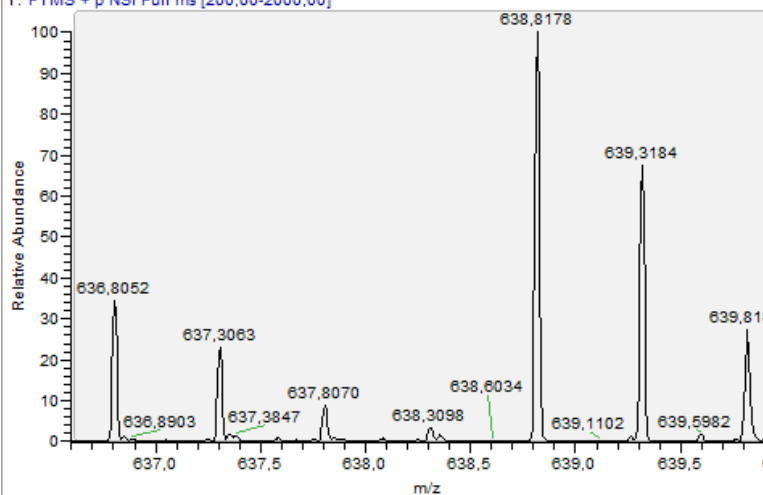

estriado\_02 #2803-2994 RT: 21,48-22,55 AV: 10 NL: 1,24E5  
T: FTMS + p NSI Full ms [200,00-2000,00]

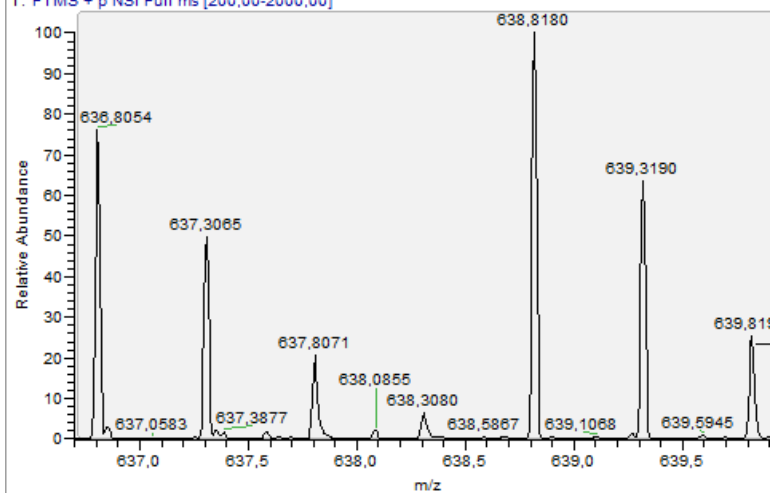

estriado\_04 #4066-4578 RT: 25,56-27,40 AV: 49 NL: 2,56E4  
T: FTMS + p NSI Full ms [200,00-2000,00]

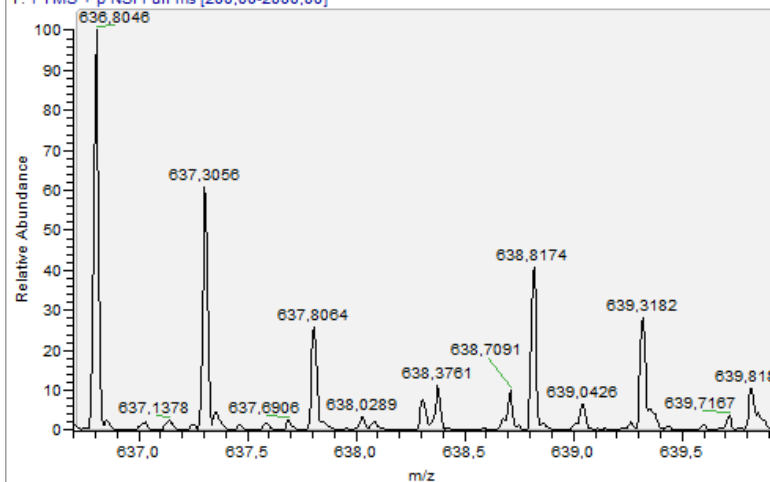



# SANSNPAMAPRE 2+ (methionine oxidation)

estriado\_01 #2258-2436 RT: 18,18-19,18 AV: 11 NL: 2,18E5  
T: FTMS + p NSI Full ms [200,00-2000,00]

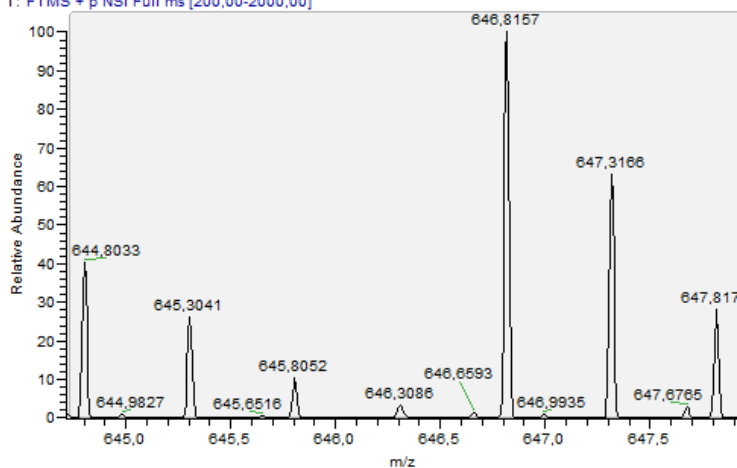

estriado\_02 #2258-2438 RT: 18,24-19,21 AV: 10 NL: 1,85E5  
T: FTMS + p NSI Full ms [200,00-2000,00]

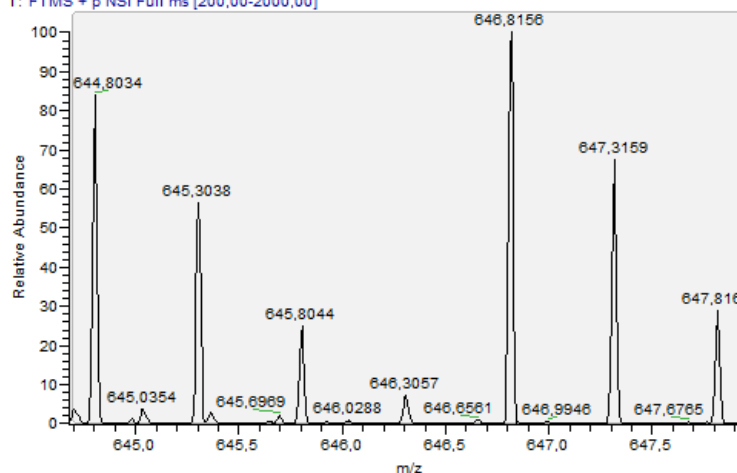

estriado\_04 #3340-3426 RT: 22,81-23,11 AV: 13 NL: 4,17E4  
T: FTMS + p NSI Full ms [200,00-2000,00]

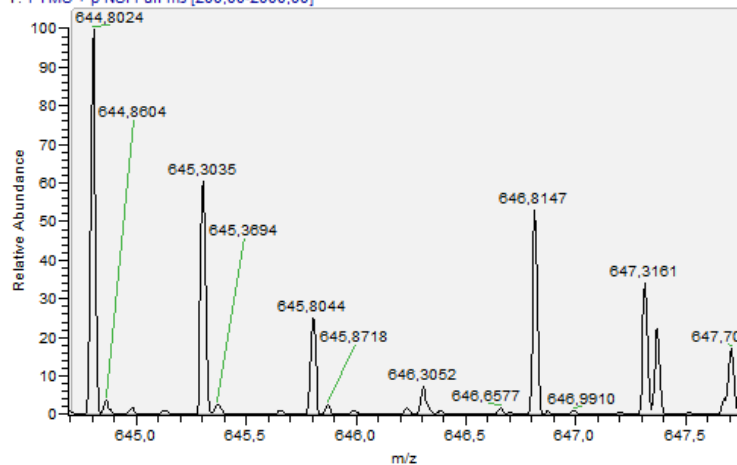

# SFARAPQLDL 2+

estriado\_01 #8025-8211 RT: 51,52-52,54 AV: 13 NL: 2,65E5  
T: FTMS + p NSI Full ms [200,00-2000,00]

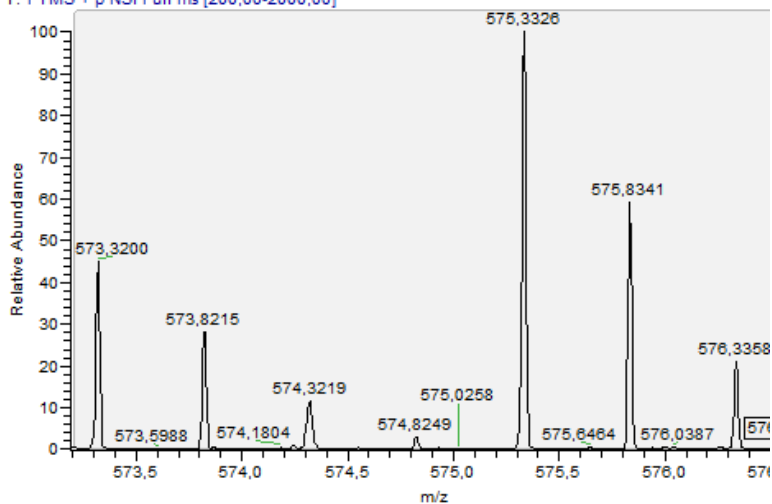

estriado\_02 #7974-8224 RT: 51,13-52,54 AV: 15 NL: 1,15E5  
T: FTMS + p NSI Full ms [200,00-2000,00]

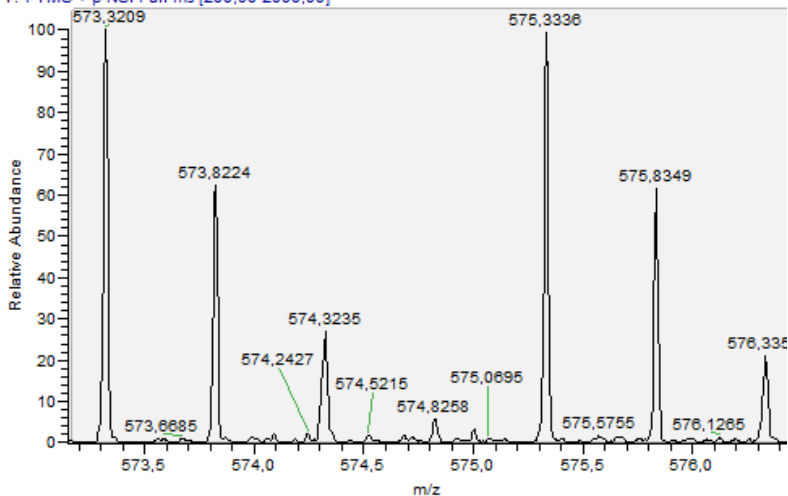

estriado\_04 #12451-12822 RT: 56,67-58,12 AV: 52 NL: 1,07E4  
T: FTMS + p NSI Full ms [200,00-2000,00]

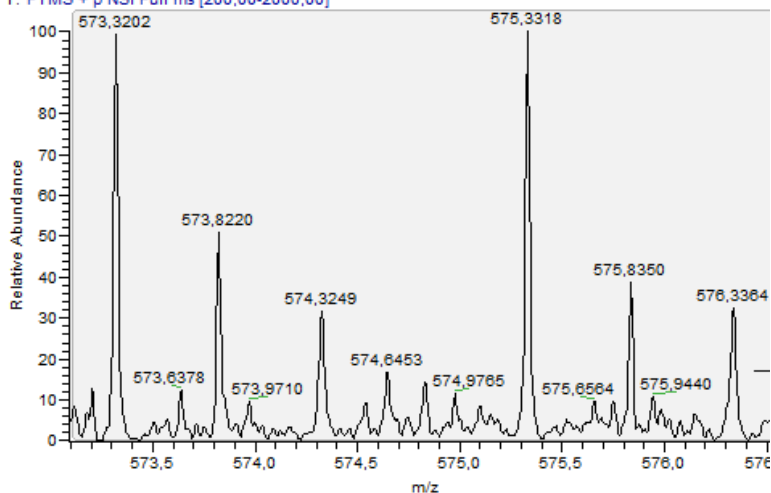

# LLDEGHYPVRESPIDTA 2+

estriado\_01 #6279-6405 RT: 41,14-41,82 AV: 7 NL: 2,21E4  
T: FTMS + p NSI Full ms [200,00-2000,00]

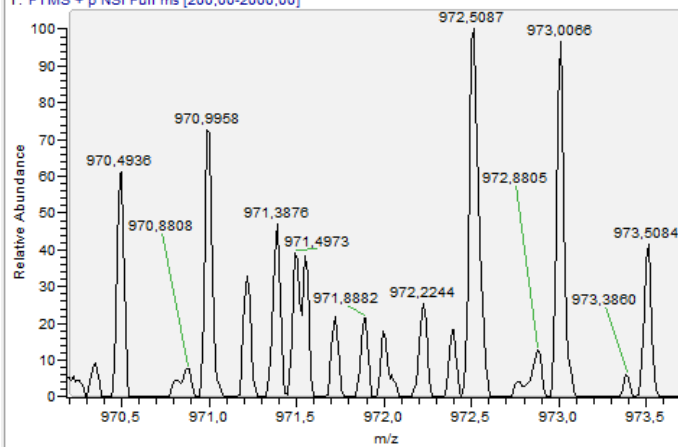

estriado\_02 #6355-6385 RT: 41,47-41,59 AV: 2 NL: 3,88E4  
T: FTMS + p NSI Full ms [200,00-2000,00]

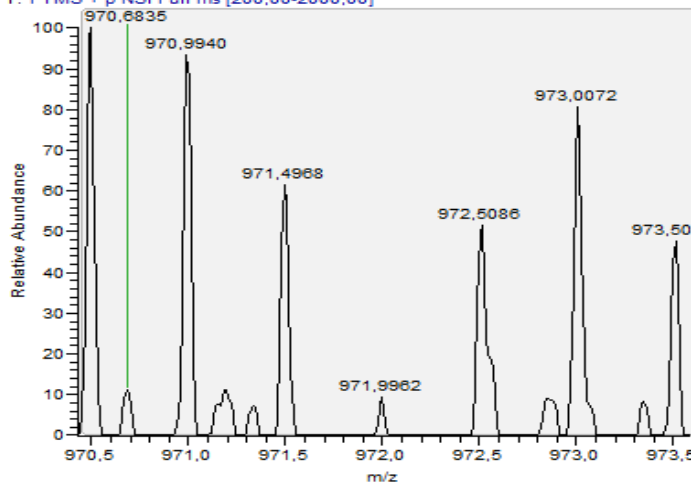

estriado\_04 #2722-4578 RT: 20,38-27,40 AV: 219 NL: 2,07E3  
T: FTMS + p NSI Full ms [200,00-2000,00]

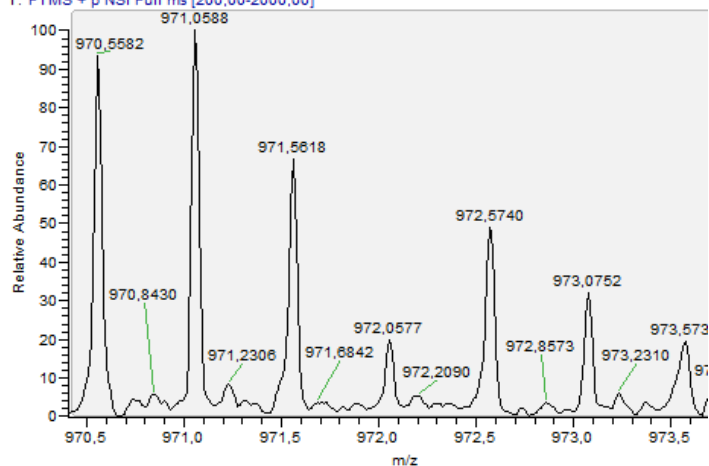

# SPQLEDEAKELQ 2 +

estriado\_01 #5831-6088 RT: 38,53-39,97 AV: 18 NL: 4,19E4  
T: FTMS + p NSI Full ms [200,00-2000,00]

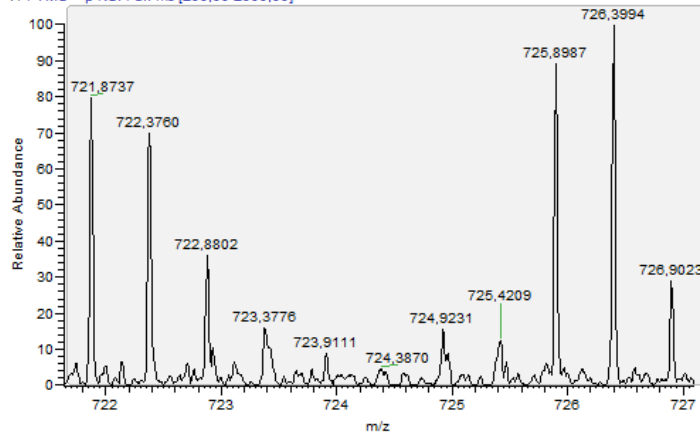

estriado\_02 #5827-5870 RT: 38,48-38,66 AV: 3 NL: 5,76E5  
T: FTMS + p NSI Full ms [200,00-2000,00]

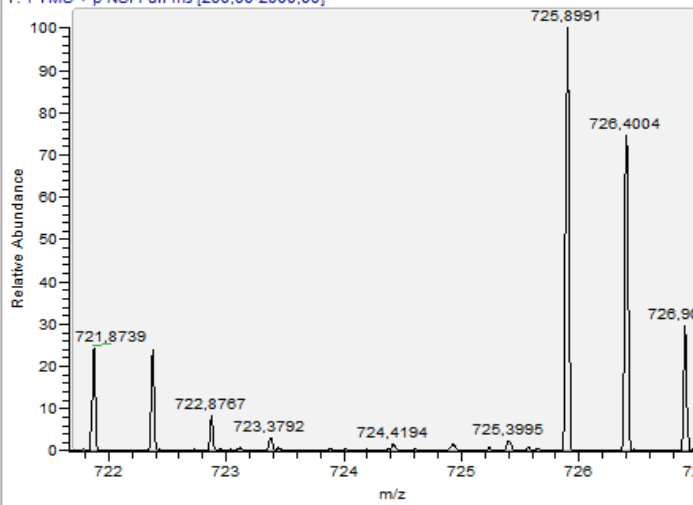

estriado\_04 #8966-10436 RT: 43,35-48,84 AV: 178 NL: 8,62E4  
T: FTMS + p NSI Full ms [200,00-2000,00]

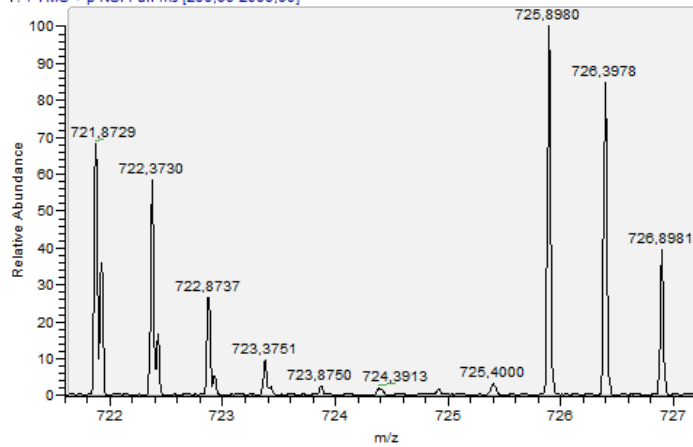

# ADEVSLAKQGL 2+

estriado\_01 #6469-6717 RT: 42,25-43,65 AV: 30 NL: 6,82E4

T: FTMS + p NSI Full ms [200,00-2000,00]

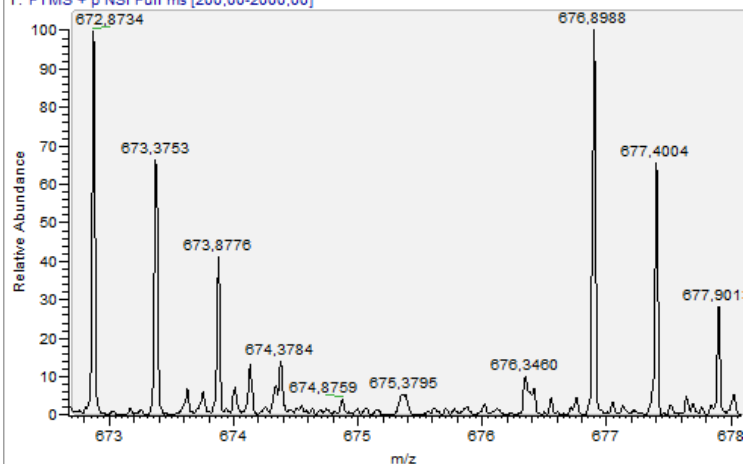

estriado\_02 #6386-6729 RT: 41,71-43,64 AV: 27 NL: 6,28E4

T: FTMS + p NSI Full ms [200,00-2000,00]

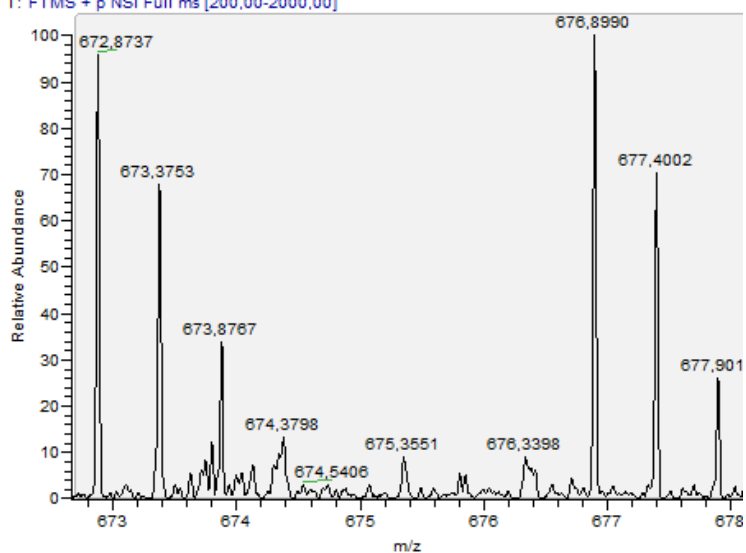

estriado\_04 #9947-10330 RT: 47,05-48,51 AV: 51 NL: 3,14E4

T: FTMS + p NSI Full ms [200,00-2000,00]

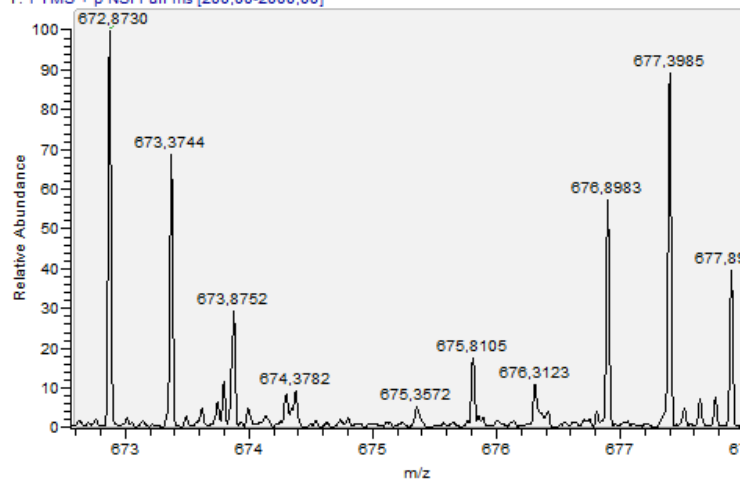

# SGPFGQIFRPDNF 2+

estriado\_01 #10554-10736 RT: 66,70-67,76 AV: 10 NL: 4,21E4  
T: FTMS + p NSI Full ms [200,00-2000,00]

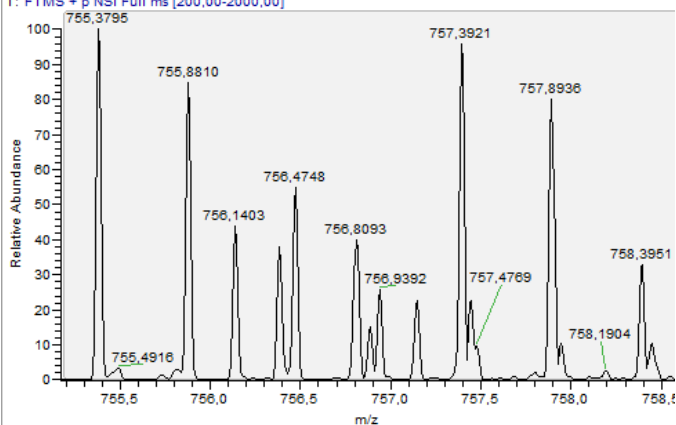

estriado\_02 #10623-10651 RT: 67,16-67,27 AV: 2 NL: 6,72E4  
T: FTMS + p NSI Full ms [200,00-2000,00]

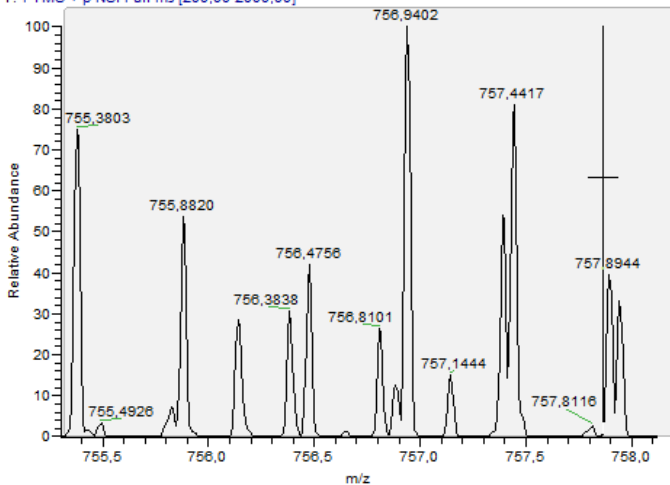

estriado\_04 #15674-15860 RT: 69,64-70,36 AV: 23 NL: 2,91E4  
T: FTMS + p NSI Full ms [200,00-2000,00]

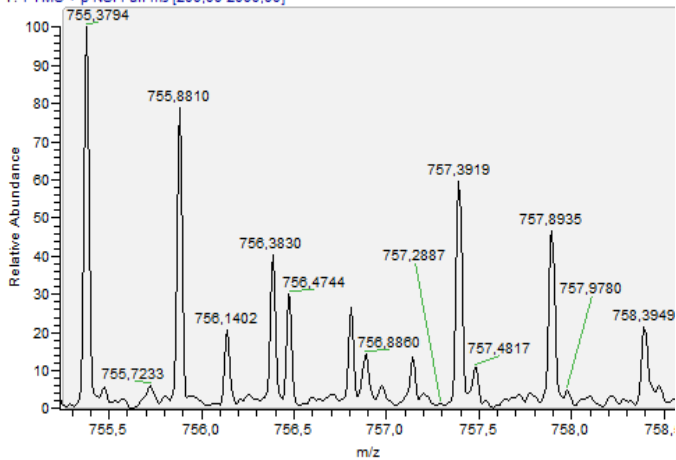

# SGQAAARPLVATV 2+

estriado\_01 #5245-5503 RT: 35,19-36,60 AV: 19 NL: 1,14E5  
T: FTMS + p NSI Full ms [200,00-2000,00]

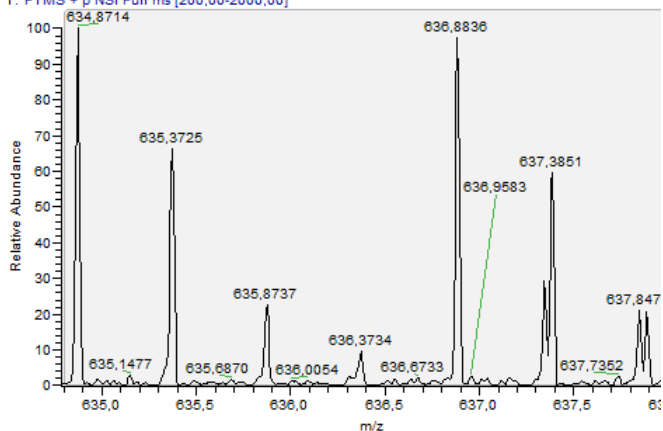

estriado\_02 #5319-5538 RT: 35,60-36,74 AV: 12 NL: 9,55E4  
T: FTMS + p NSI Full ms [200,00-2000,00]

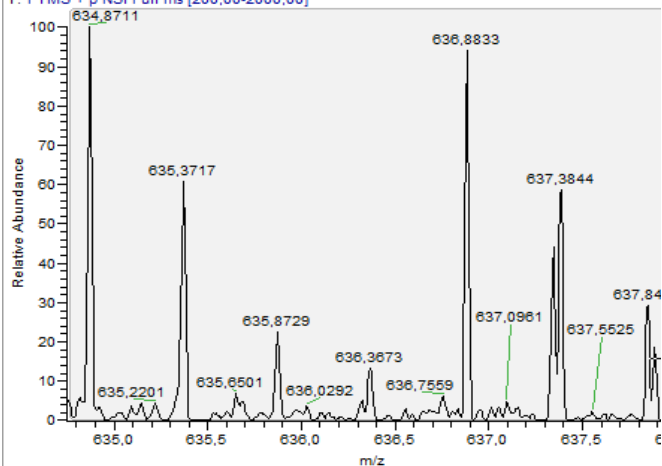

estriado\_04 #8057-8462 RT: 40,00-41,43 AV: 38 NL: 4,50E4  
T: FTMS + p NSI Full ms [200,00-2000,00]

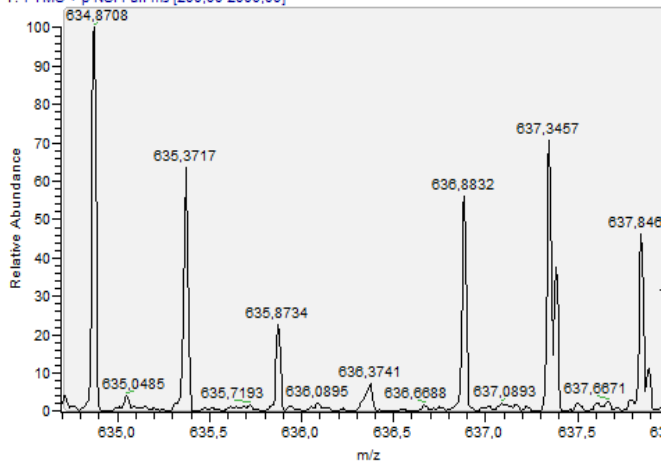

# TVGLNVPASVRF 2+

estriado\_01 #9257 RT: 58,83 AV: 1 NL: 2,71E5  
T: FTMS + p NSI Full ms [200,00-2000,00]

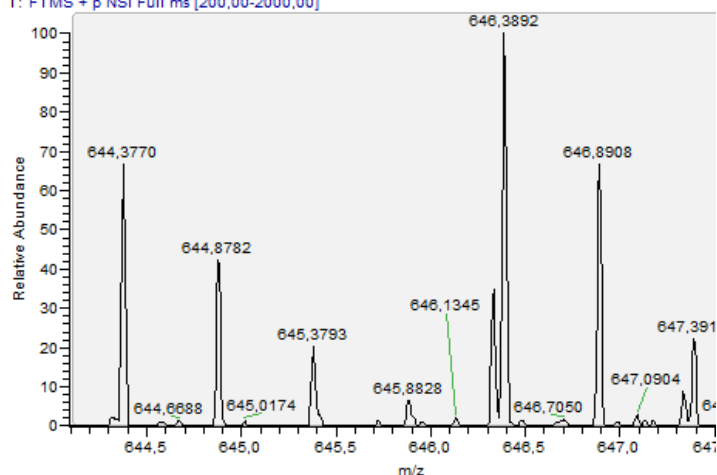

estriado\_02 #9326 RT: 59,26 AV: 1 NL: 2,68E5  
T: FTMS + p NSI Full ms [200,00-2000,00]

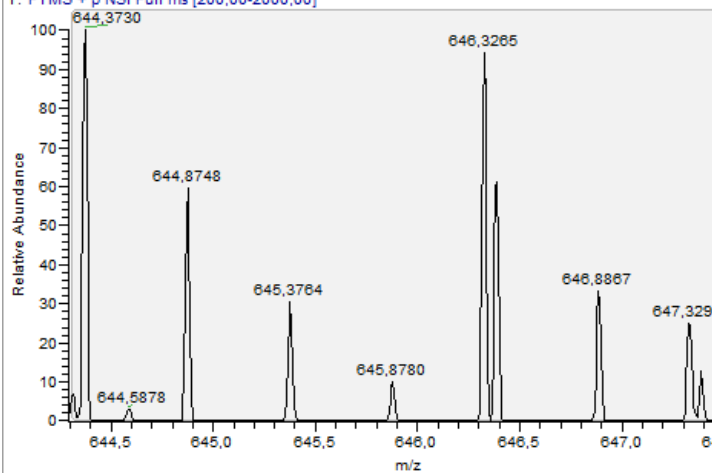

estriado\_04 #13462-13831 RT: 60,76-62,19 AV: 53 NL: 1,19E4  
T: FTMS + p NSI Full ms [200,00-2000,00]

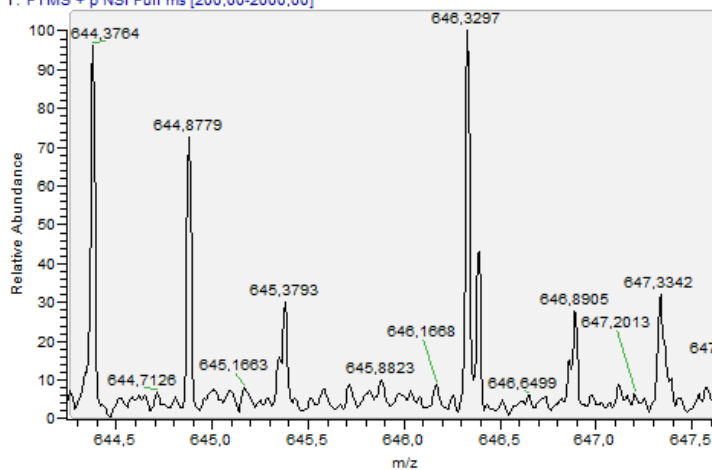



# AQATGKPAQYIAVHVVPDQL

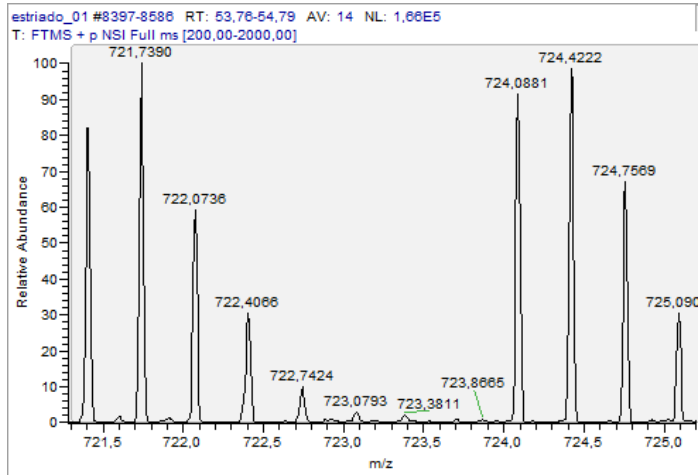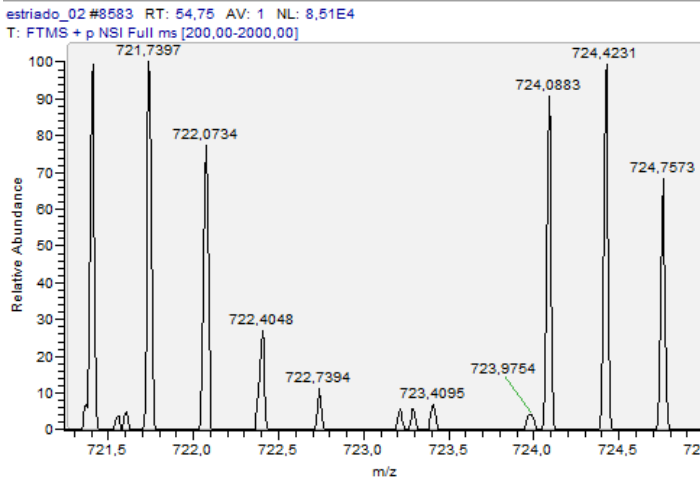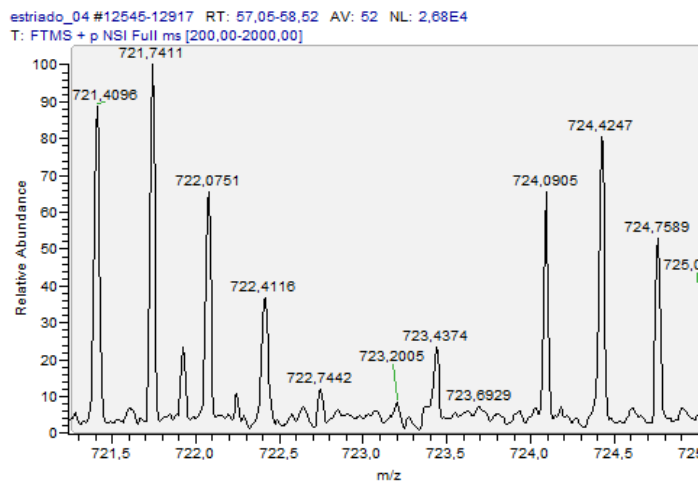

# FHNPHVNPLPTGYEDE 2+

estriado\_01 #5958-6151 RT: 39,35-40,37 AV: 11 NL: 1,66E4  
T: FTMS + p NSI Full ms [200,00-2000,00]

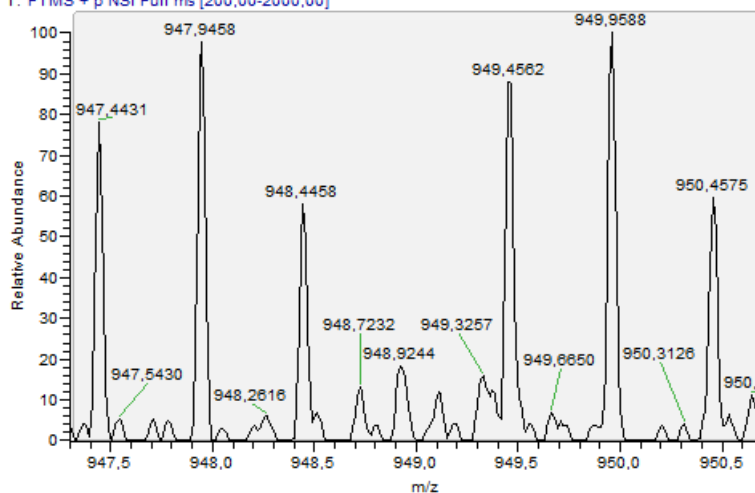

estriado\_02 #5909-6102 RT: 38,99-39,95 AV: 14 NL: 4,01E4  
T: FTMS + p NSI Full ms [200,00-2000,00]

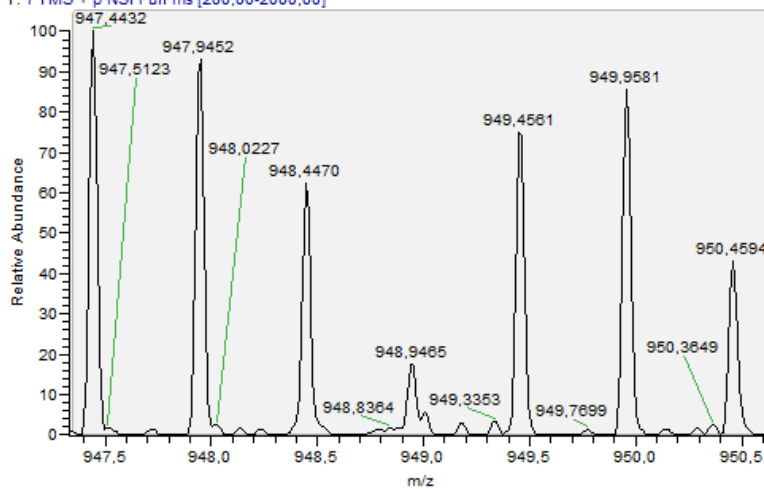

estriado\_04 #8966-9349 RT: 43,35-44,81 AV: 54 NL: 4,38E3  
T: FTMS + p NSI Full ms [200,00-2000,00]

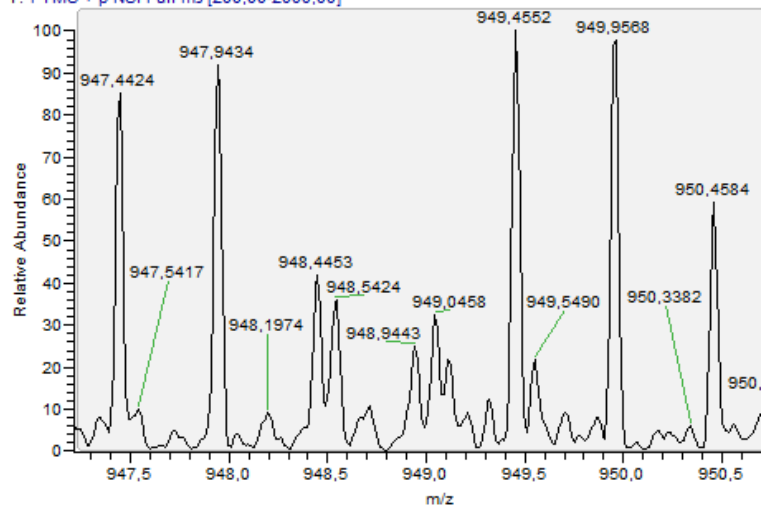

# HNPHVNPLPTGYEDE 2+

estriado\_01 #4913-5177 RT: 33,37-34,76 AV: 18 NL: 3,53E4  
T: FTMS + p NSI Full ms [200,00-2000,00]

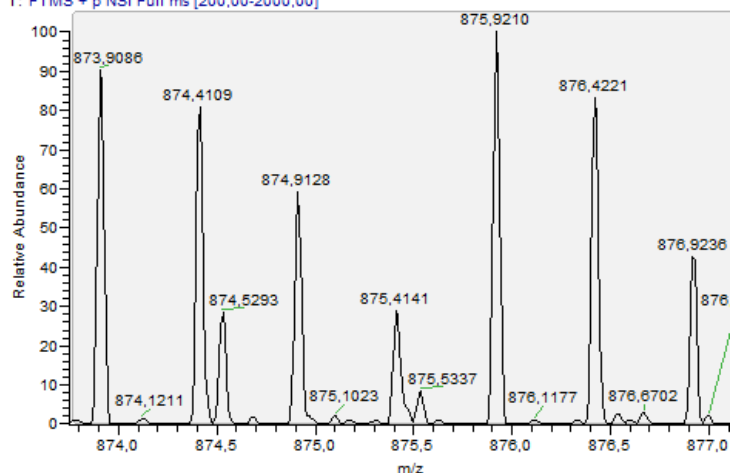

estriado\_02 #5057-5251 RT: 34,08-35,10 AV: 11 NL: 2,99E4  
T: FTMS + p NSI Full ms [200,00-2000,00]

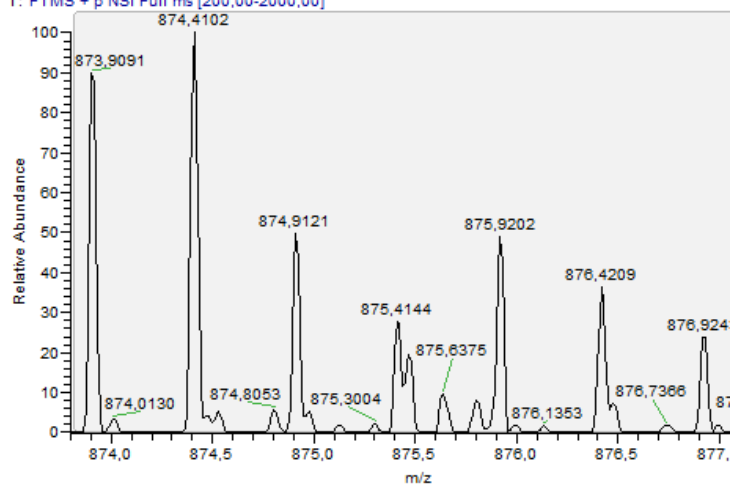

estriado\_04 #7570-7706 RT: 38,16-38,65 AV: 15 NL: 1,29E4  
T: FTMS + p NSI Full ms [200,00-2000,00]

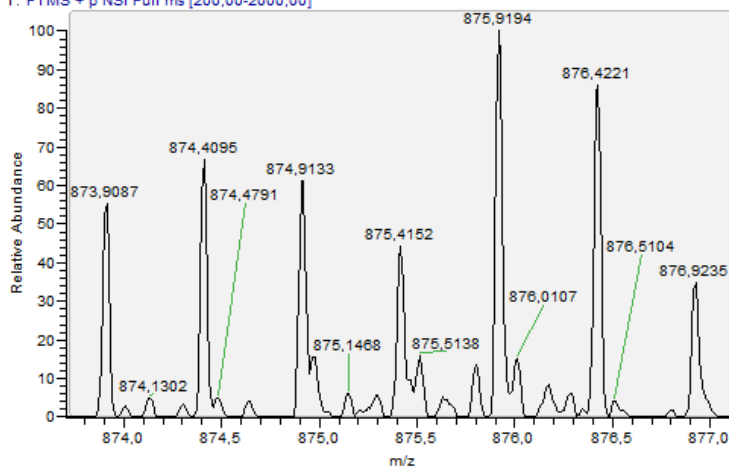

# GISTPEELGLDKV 2+

estriado\_01 #8461-8649 RT: 54,12-55,13 AV: 15 NL: 3,09E5

T: FTMS + p NSI Full ms [200,00-2000,00]

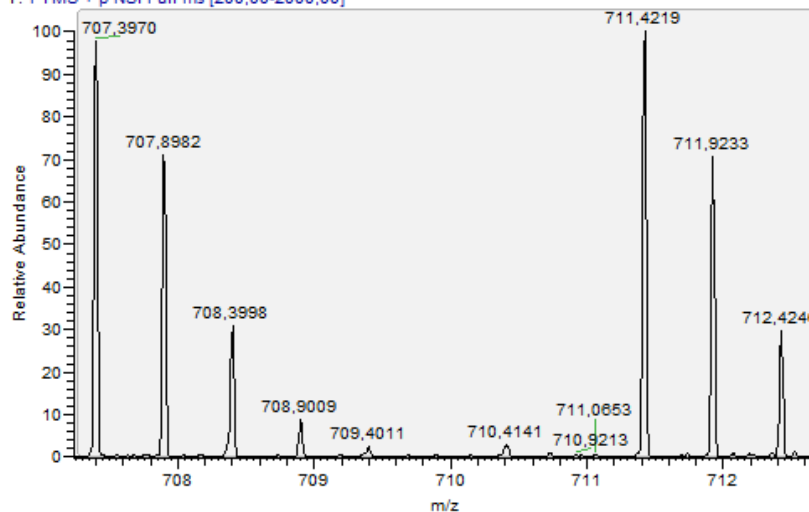

estriado\_02 #8533-8716 RT: 54,46-55,54 AV: 16 NL: 2,46E5

T: FTMS + p NSI Full ms [200,00-2000,00]

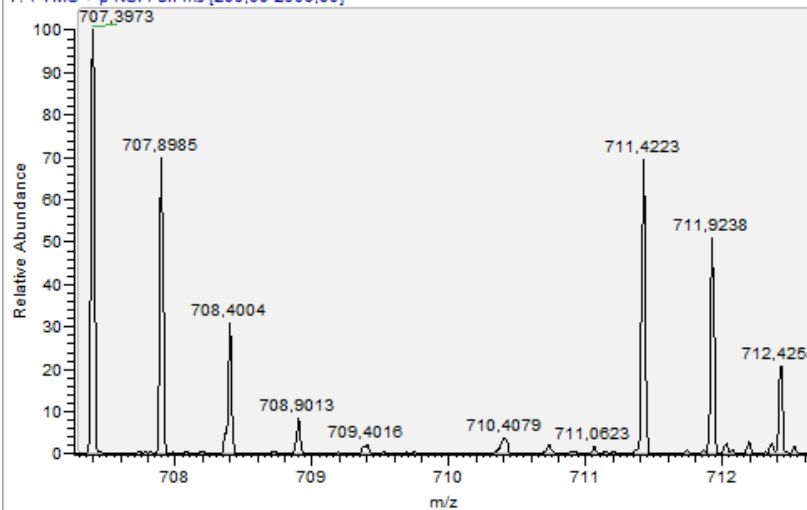

estriado\_04 #12733-13097 RT: 57,79-59,26 AV: 58 NL: 7,02E4

T: FTMS + p NSI Full ms [200,00-2000,00]

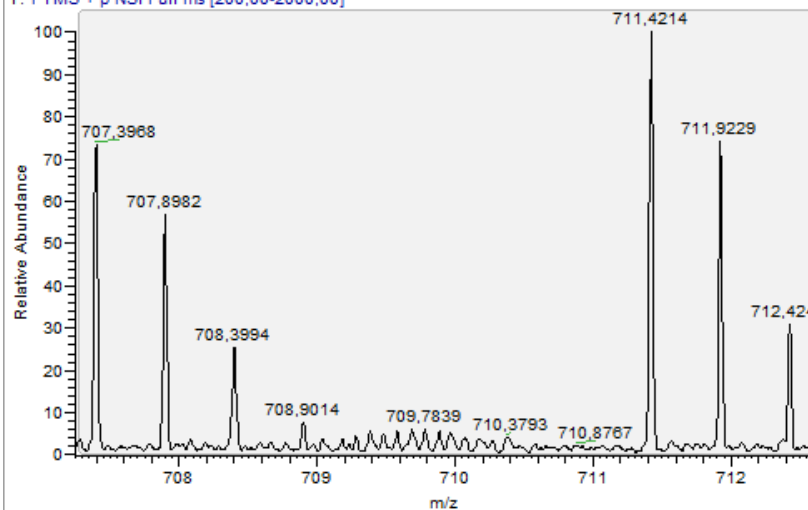

# RPTLNELGISTPEELGLDKV 3+

estriado\_01 #10190-10373 RT: 64,46-65,51 AV: 12 NL: 2,90E4  
T: FTMS + p NSI Full ms [200,00-2000,00]

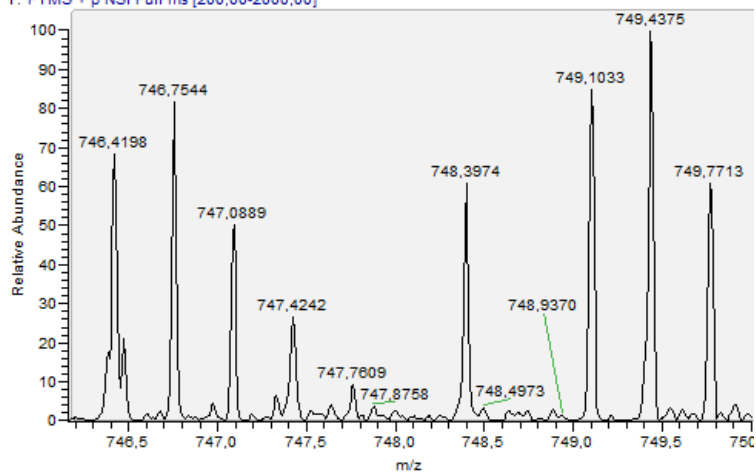

estriado\_02 #10292-10348 RT: 65,20-65,43 AV: 3 NL: 6,34E4  
T: FTMS + p NSI Full ms [200,00-2000,00]

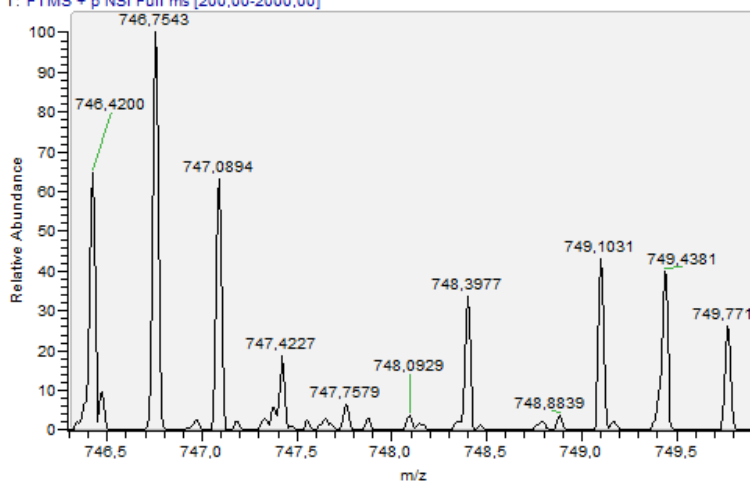

estriado\_04 #14657-15487 RT: 65,57-68,84 AV: 118 NL: 1,27E4  
T: FTMS + p NSI Full ms [200,00-2000,00]

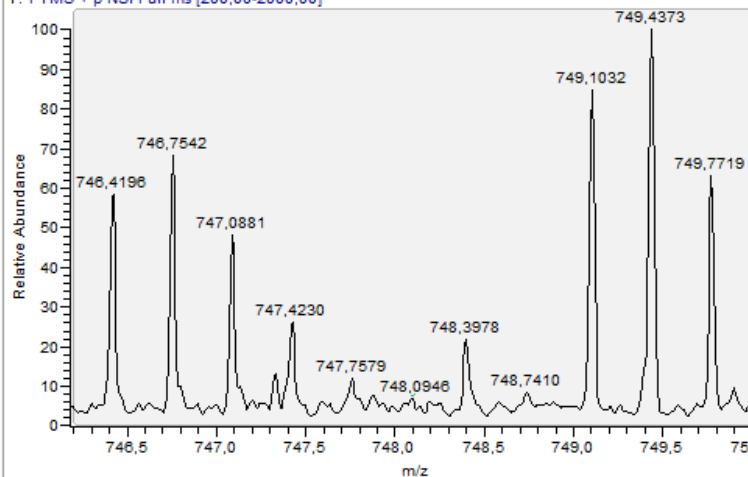

# ASKGLGSDLDSSLASL 2+

estriado\_01 #9645 RT: 61,14 AV: 1 NL: 5,41E4  
T: FTMS + p NSI Full ms [200,00-2000,00]

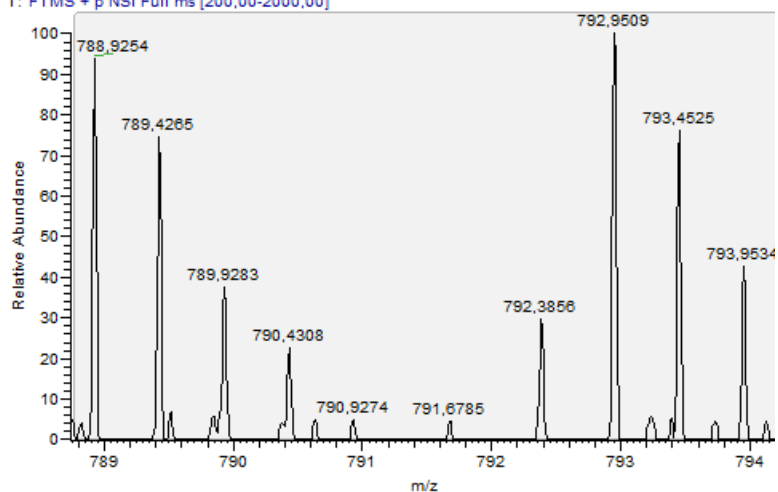

estriado\_02 #9574-9756 RT: 60,76-61,77 AV: 12 NL: 6,65E4  
T: FTMS + p NSI Full ms [200,00-2000,00]

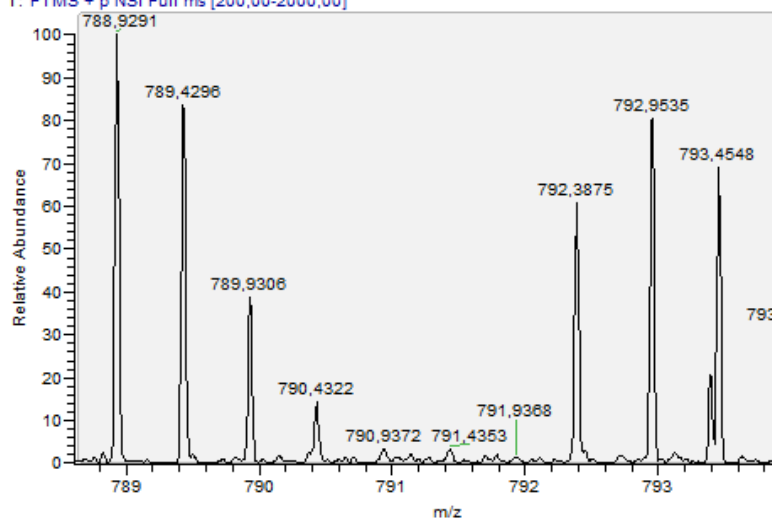

estriado\_04 #14195-14472 RT: 63,74-64,81 AV: 41 NL: 1,91E4  
T: FTMS + p NSI Full ms [200,00-2000,00]

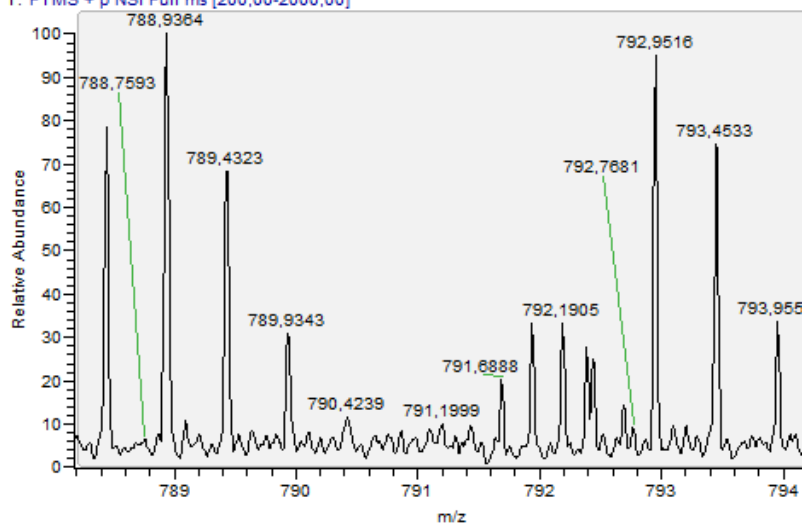

# SPSPTPATQSPKKPPAKDPLADLNIKDFL 4+

estriado\_01 #10736-10916 RT: 67,88-68,83 AV: 13 NL: 4,12E4  
T: FTMS + p NSI Full ms [200,00-2000,00]

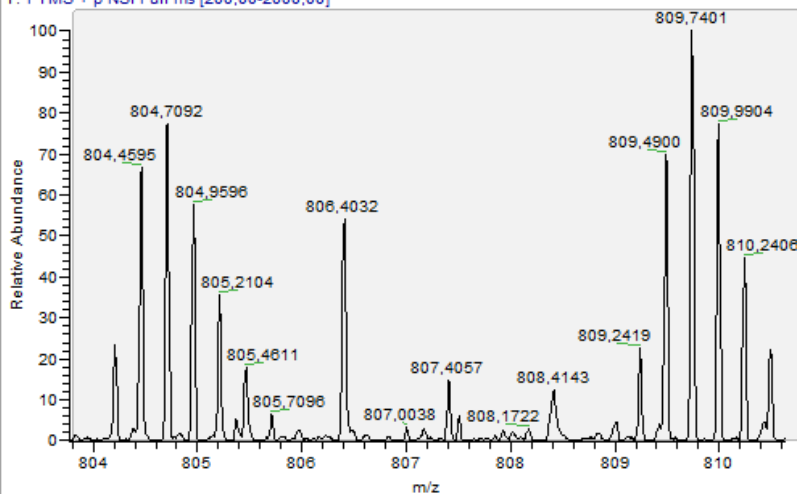

estriado\_02 #10665-10842 RT: 67,45-68,51 AV: 14 NL: 1,87E5  
T: FTMS + p NSI Full ms [200,00-2000,00]

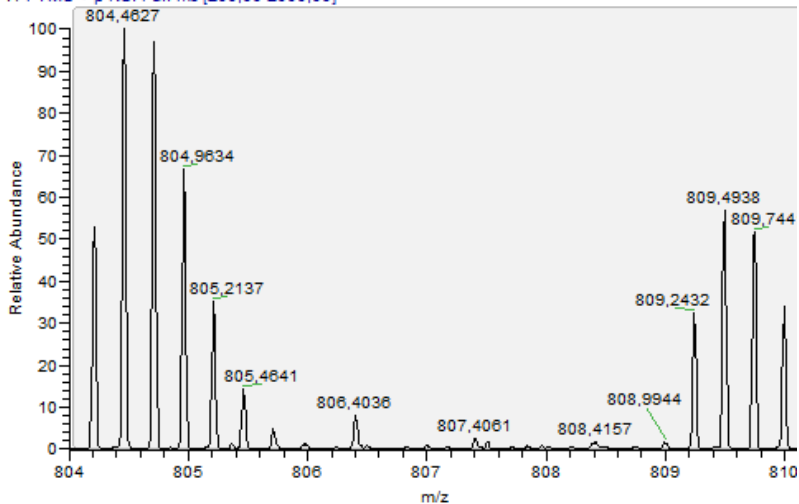

estriado\_04 #15211-15674 RT: 67,80-68,60 AV: 61 NL: 1,26E5  
T: FTMS + p NSI Full ms [200,00-2000,00]

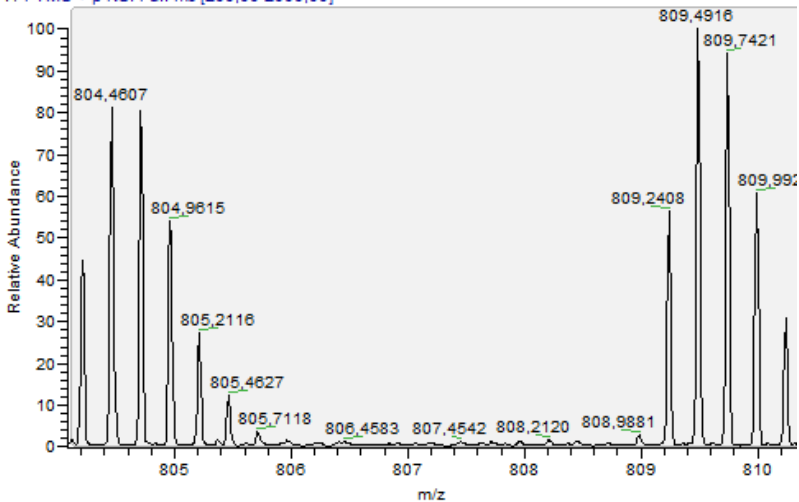

# AVGSGGKGKSGEIEPVSV

estriado\_01 #4580-4848 RT: 31,52-32,86 AV: 13 NL: 1,93E4  
T: FTMS + p NSI Full ms [200,00-2000,00]

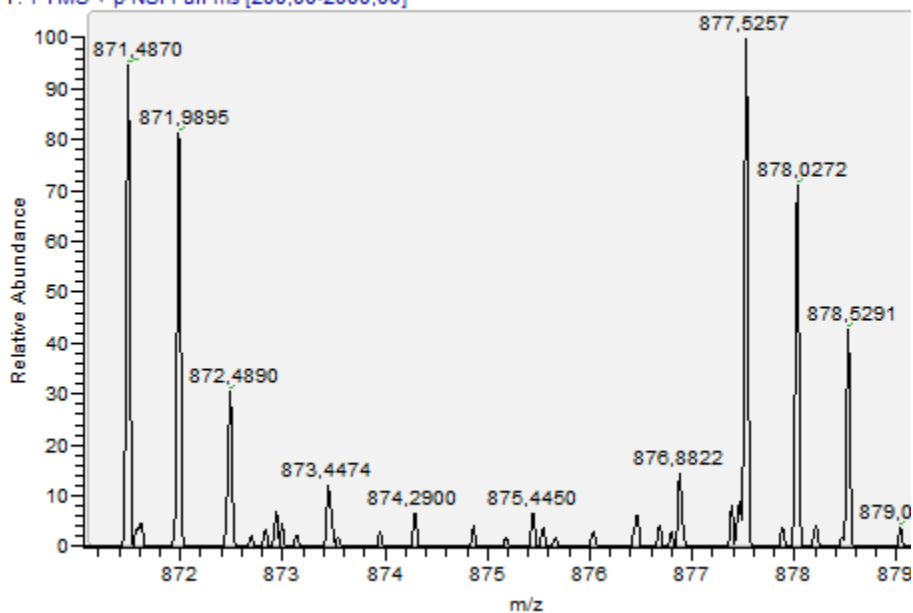

estriado\_02 #4519-4852 RT: 31,15-32,95 AV: 19 NL: 1,19E4  
T: FTMS + p NSI Full ms [200,00-2000,00]

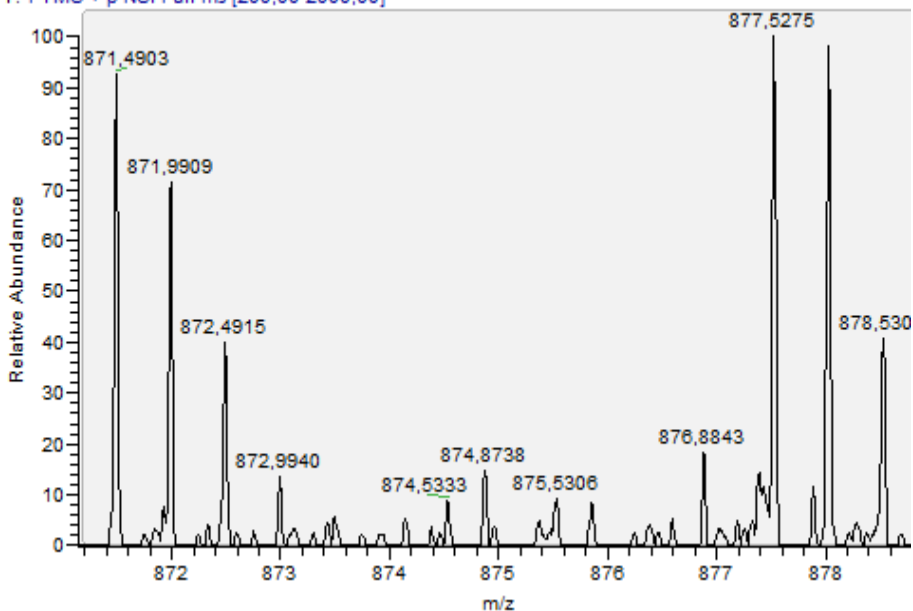



# AGGPPHPQLNKS

estriado\_01 #2951 RT: 22,39 AV: 1 NL: 4,11E4  
T: FTMS + p NSI Full ms [200,00-2000,00]

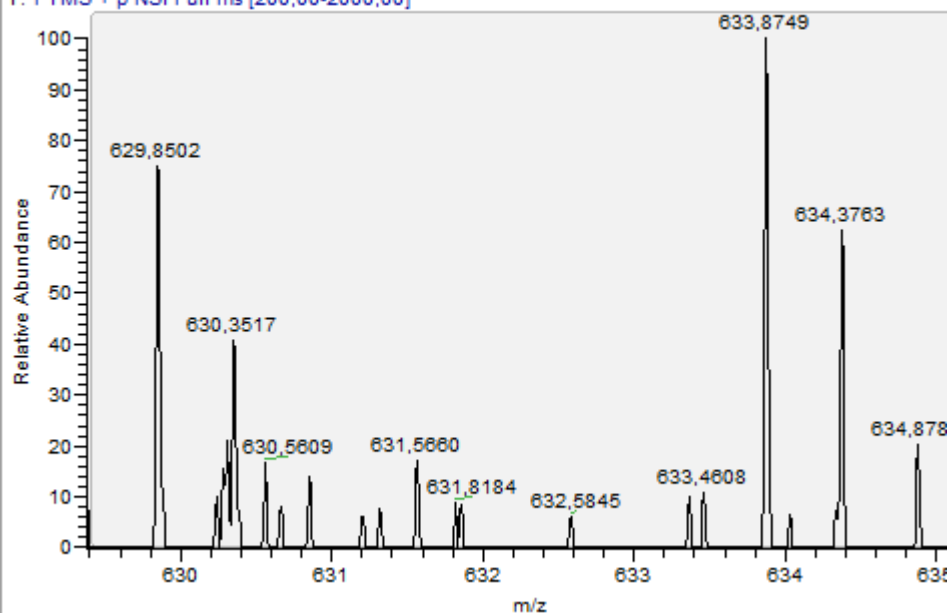

estriado\_02 #2855-2943 RT: 21,83-22,19 AV: 4 NL: 4,03E4  
T: FTMS + p NSI Full ms [200,00-2000,00]

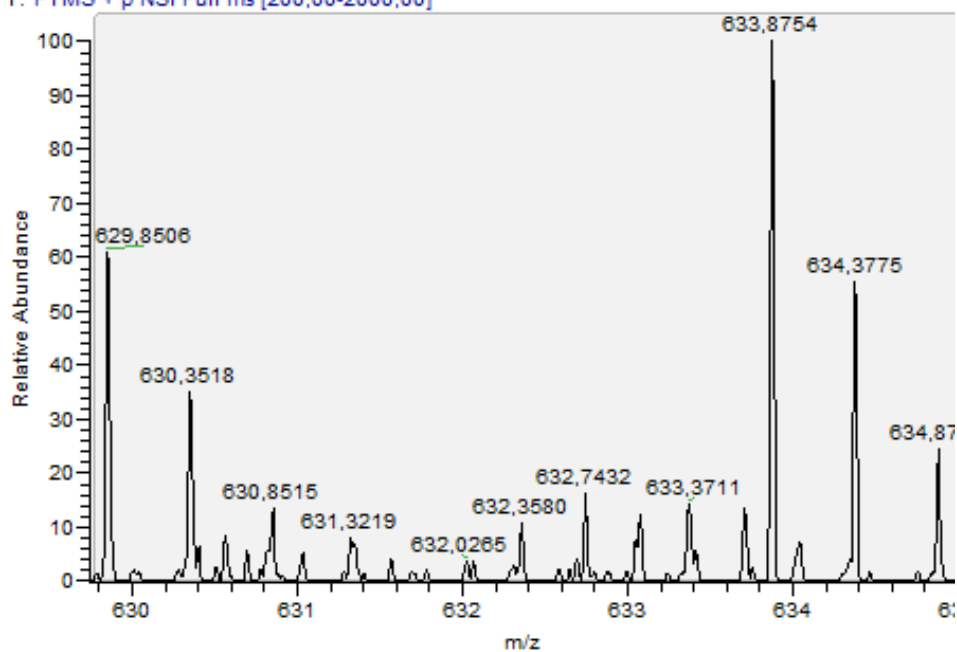

# GQGAGALVHSE 2+

estriado\_01 #3177-3375 RT: 23,82-24,80 AV: 10 NL: 9,51E4  
T: FTMS + p NSI Full ms [200,00-2000,00]

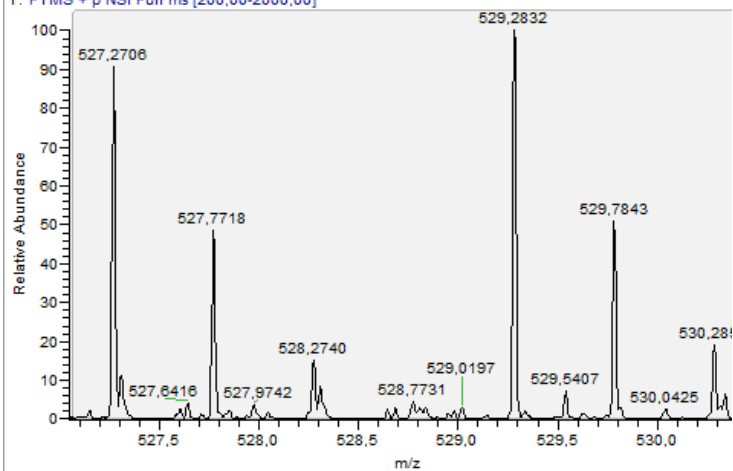

estriado\_02 #3072-3357 RT: 23,16-24,60 AV: 13 NL: 7,21E4  
T: FTMS + p NSI Full ms [200,00-2000,00]

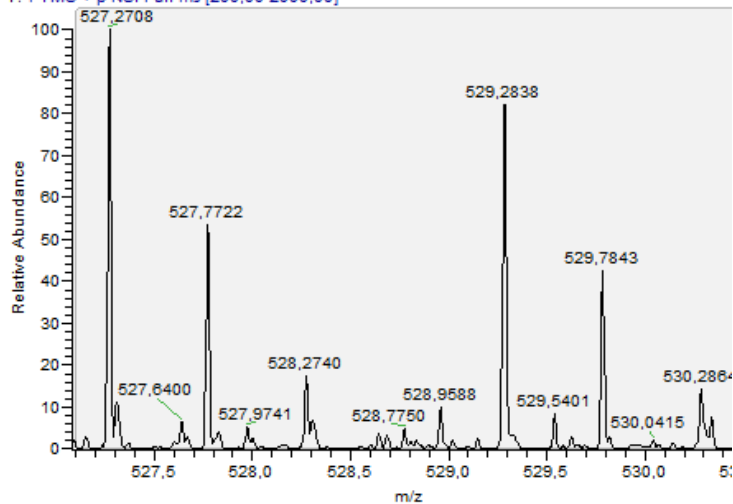

estriado\_04 #4787-5208 RT: 28,20-29,60 AV: 32 NL: 2,09E4  
T: FTMS + p NSI Full ms [200,00-2000,00]

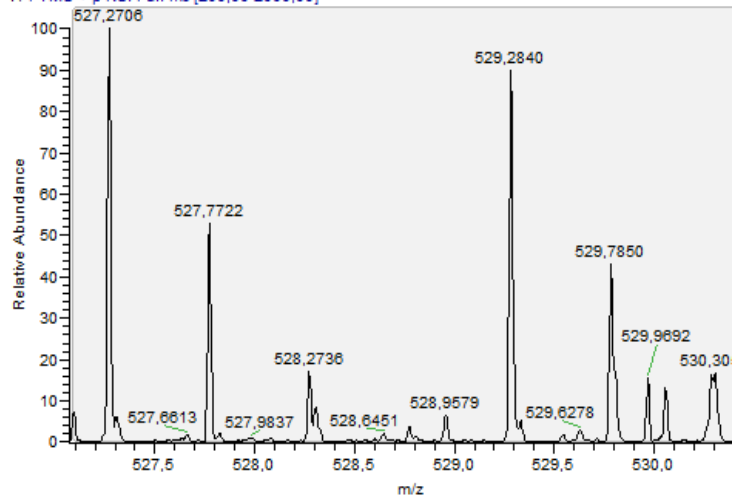

# AFRVPTPNVSVVDL 2+

estriado\_01 #10797-11154 RT: 68,21-70,34 AV: 26 NL: 8,93E3  
T: FTMS + p NSI Full ms [200,00-2000,00]

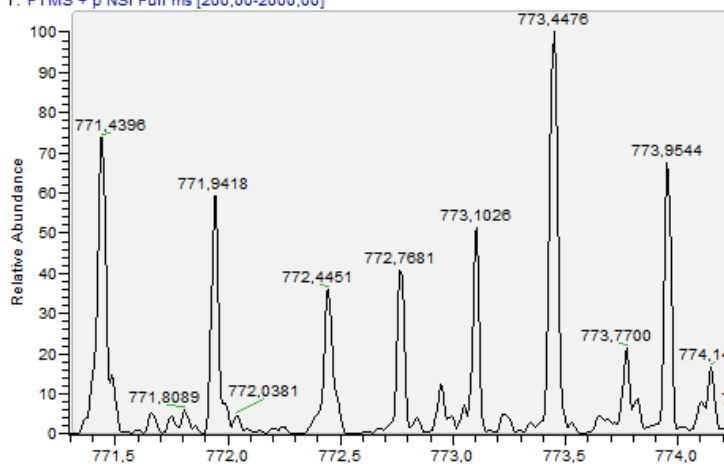

estriado\_02 #10747-10941 RT: 67,97-69,12 AV: 13 NL: 9,41E3  
T: FTMS + p NSI Full ms [200,00-2000,00]

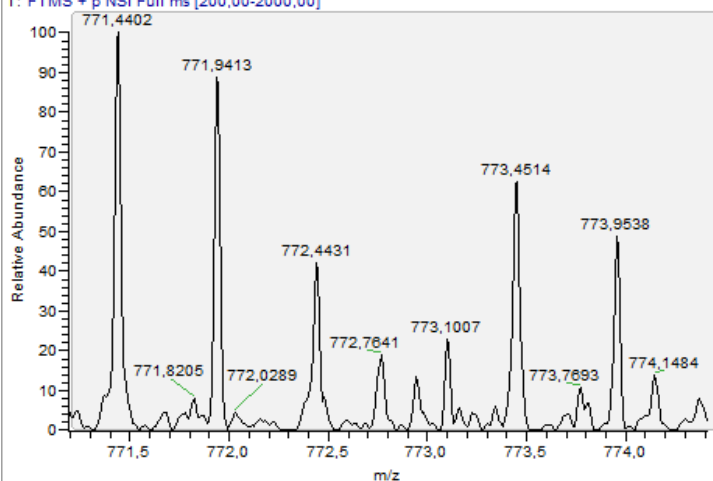

estriado\_04 #15627-15691 RT: 69,47-69,70 AV: 8 NL: 8,21E3  
T: FTMS + p NSI Full ms [200,00-2000,00]

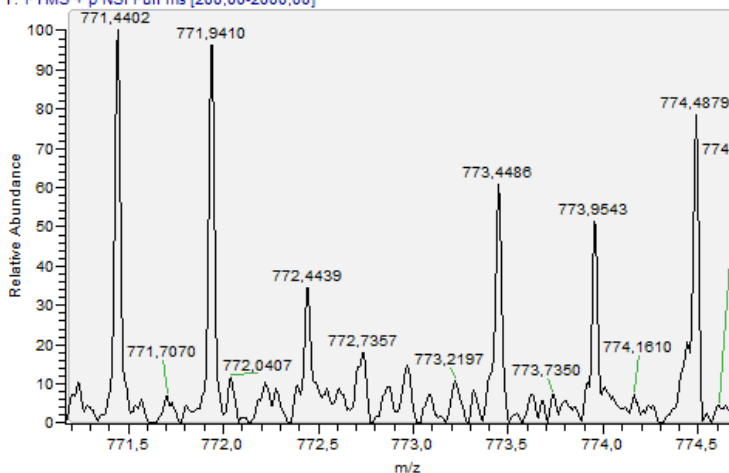

# GRKGP GPGGGAGGARGGAGGGPSGD 3+

hipocampo\_01 #2076-2214 RT: 17,01-17,79 AV: 7 NL: 7,53E4  
T: FTMS + p NSI Full ms [200,00-2000,00]

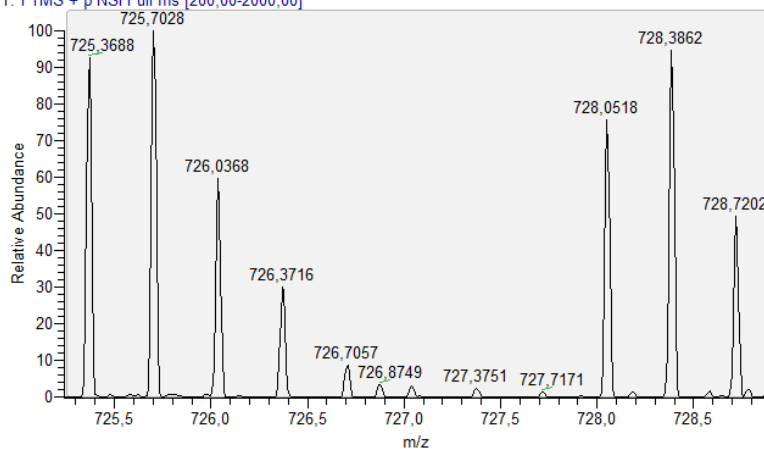

hipocampo\_02 #1973 RT: 16,40 AV: 1 NL: 3,60E5  
T: FTMS + p NSI Full ms [200,00-2000,00]

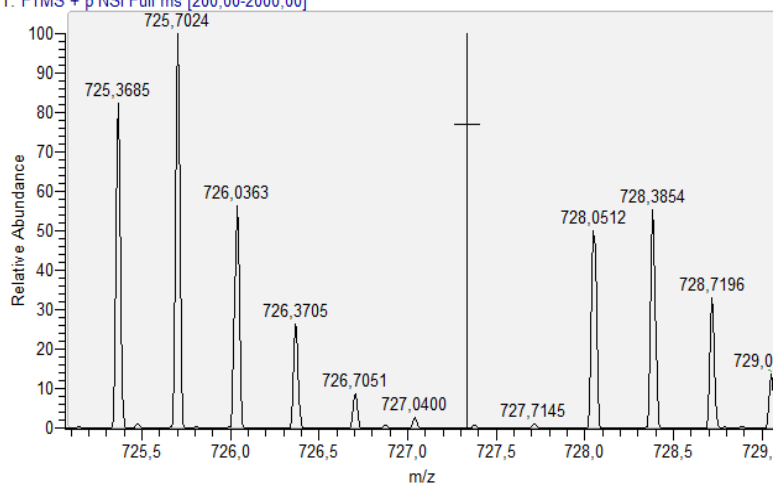

hipocampo\_04 #2386-2623 RT: 21,27-22,38 AV: 71 NL: 1,34E4  
T: FTMS + p NSI Full ms [200,00-2000,00]

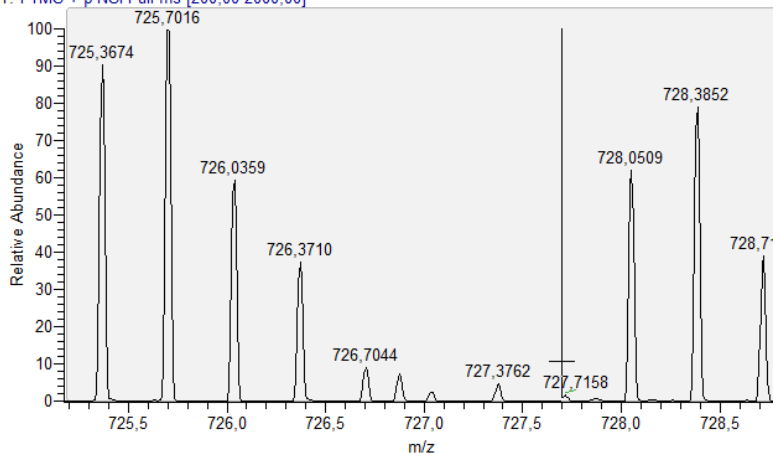

# KGPGPGGGPGGAGGARGGAGGGPSGD 2+

hipocampo\_01 #2349 RT: 18,68 AV: 1 NL: 2,61E4  
T: FTMS + p NSI Full ms [200,00-2000,00]

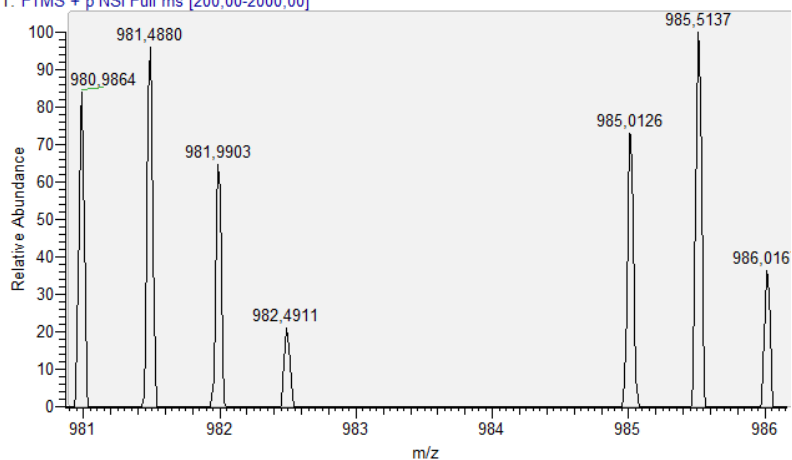

hipocampo\_02 #2159-2250 RT: 17,62-18,13 AV: 5 NL: 8,73E3  
T: FTMS + p NSI Full ms [200,00-2000,00]

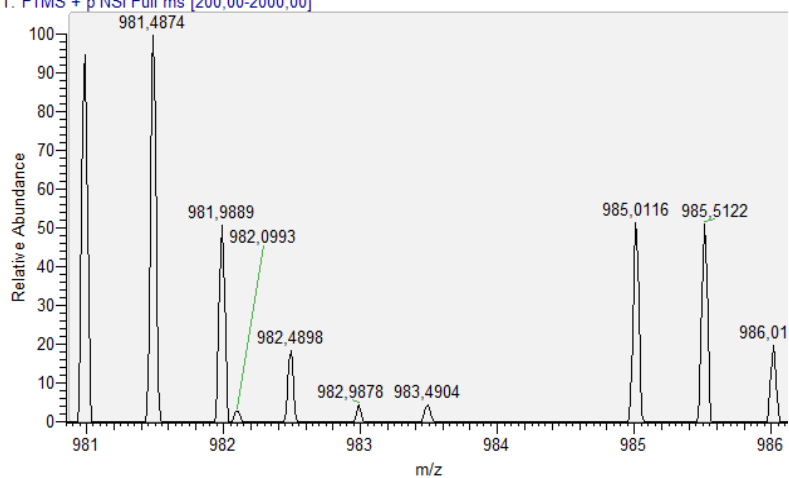

hipocampo\_04 #2722 RT: 22,83 AV: 1 NL: 2,90E3  
T: FTMS + p NSI Full ms [200,00-2000,00]

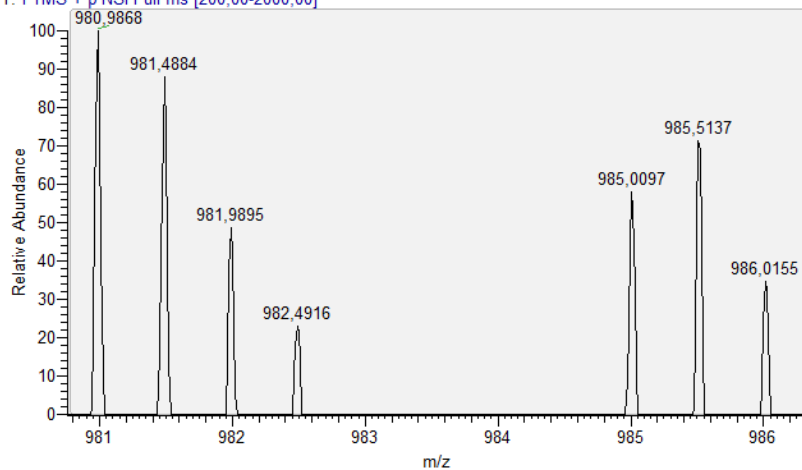

# KGPGPGGGAGGARGGAGGGPSGD 3+

hipocampo\_01 #2349 RT: 18,68 AV: 1 NL: 5,06E5  
T: FTMS + p NSI Full ms [200,00-2000,00]

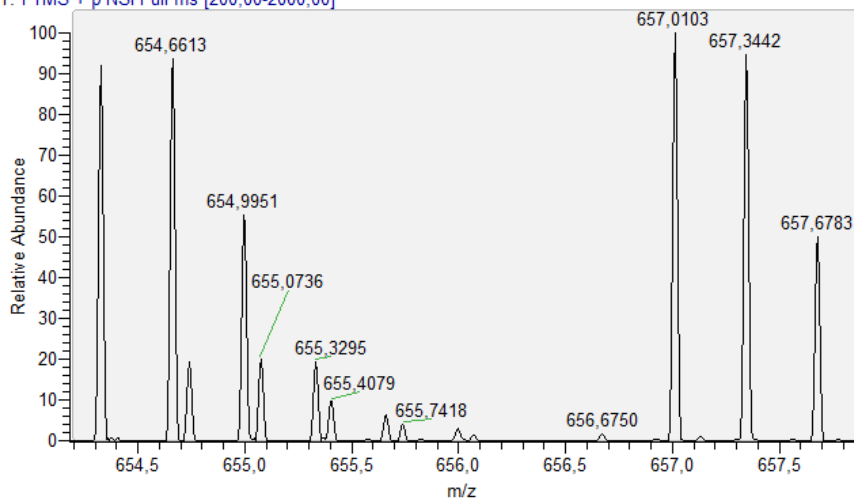

hipocampo\_02 #2228 RT: 18,00 AV: 1 NL: 3,57E5  
T: FTMS + p NSI Full ms [200,00-2000,00]

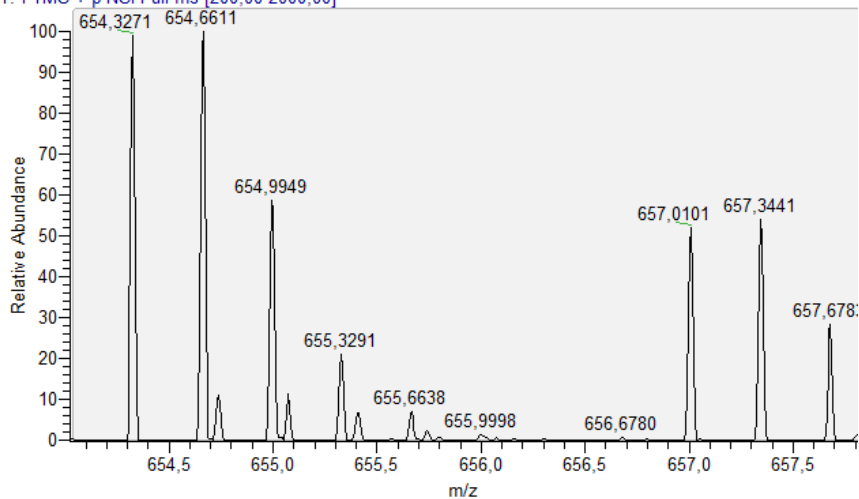

hipocampo\_04 #2727 RT: 22,85 AV: 1 NL: 1,14E5  
T: FTMS + p NSI Full ms [200,00-2000,00]

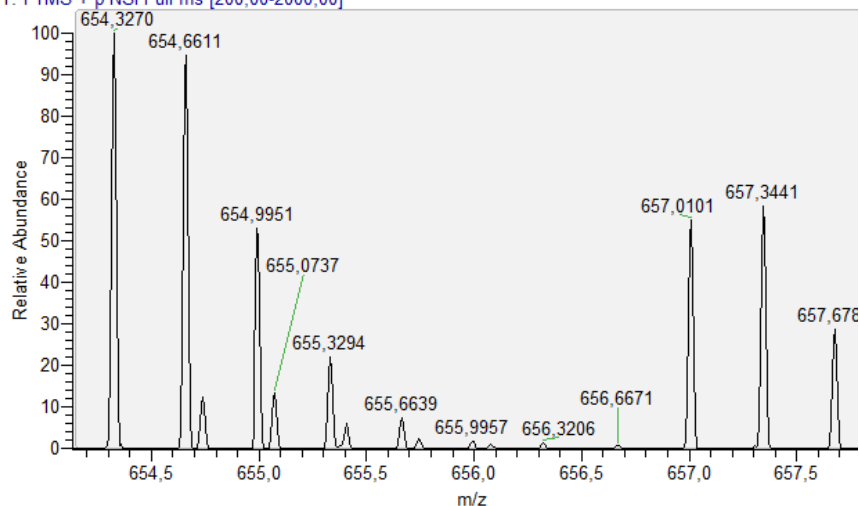

# RKGP GPGGPGGAGGARGGAGGGPSGD 3+

hipocampo\_01 #2076 RT: 17.01 AV: 1 NL: 9,28E4

T: FTMS + p NSI Full ms [200,00-2000,00]

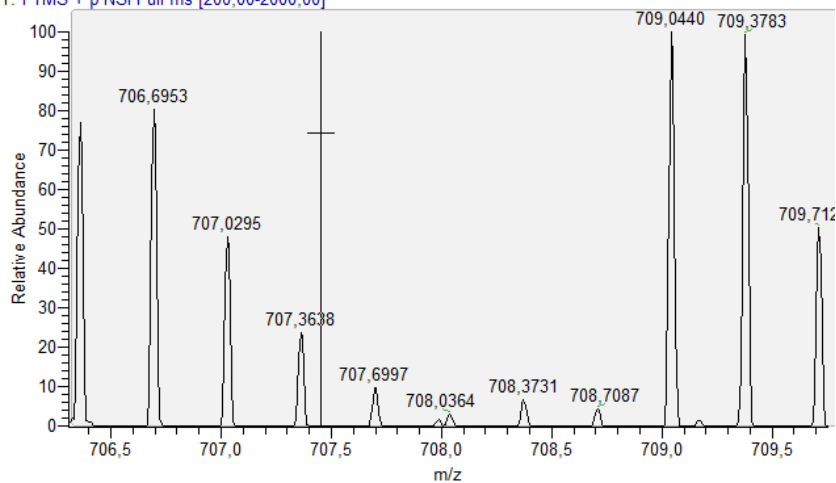

hipocampo\_02 #1892-2114 RT: 15,89-17,29 AV: 12 NL: 1,34E4

T: FTMS + p NSI Full ms [200,00-2000,00]

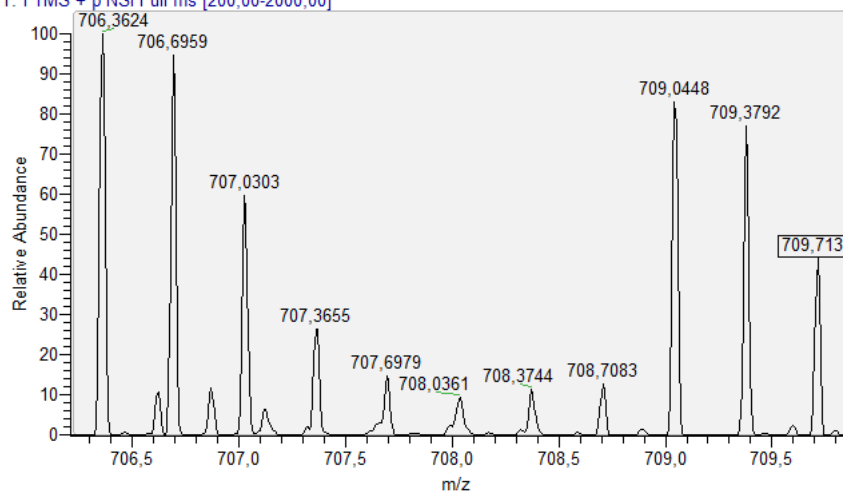

hipocampo\_04 #2339-2946 RT: 20,98-23,78 AV: 173 NL: 6,22E3

T: FTMS + p NSI Full ms [200,00-2000,00]

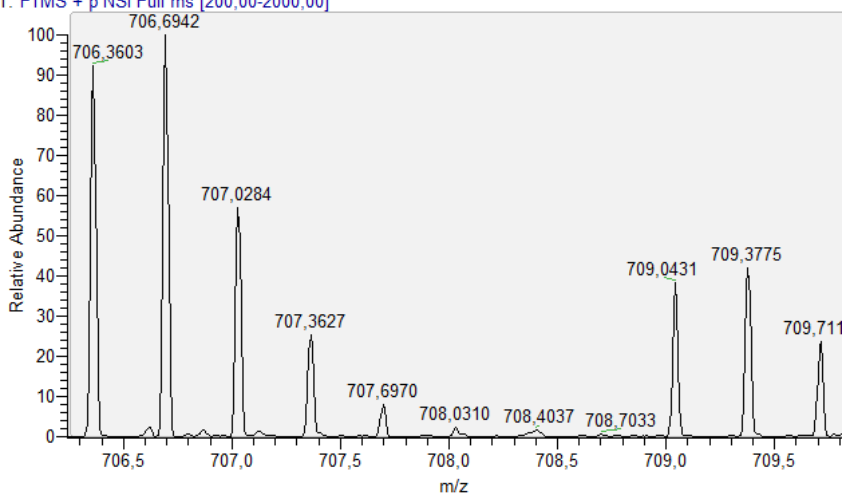

# ATVGDVNTDRPGLLDL 2+

hipocampo\_01 #9668-9947 RT: 60,40-62,06 AV: 31 NL: 8,51E3  
T: FTMS + p NSI Full ms [200,00-2000,00]

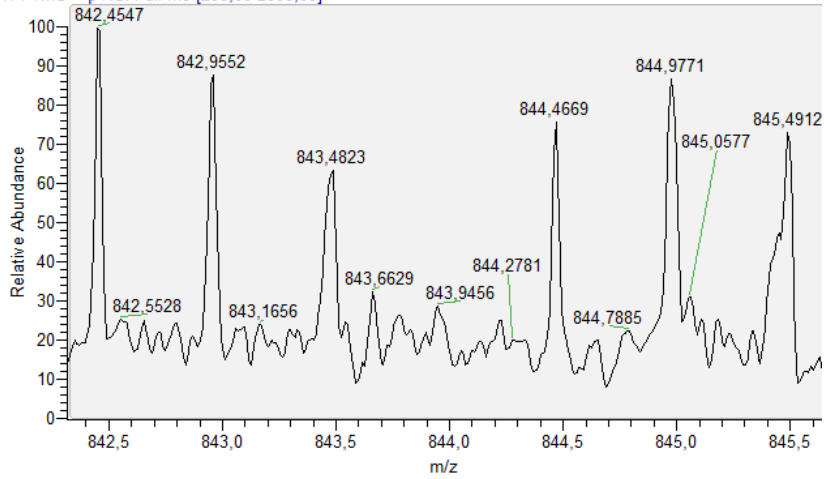

hipocampo\_02 #9060-9107 RT: 57,59-57,82 AV: 5 NL: 2,80E4  
T: FTMS + p NSI Full ms [200,00-2000,00]

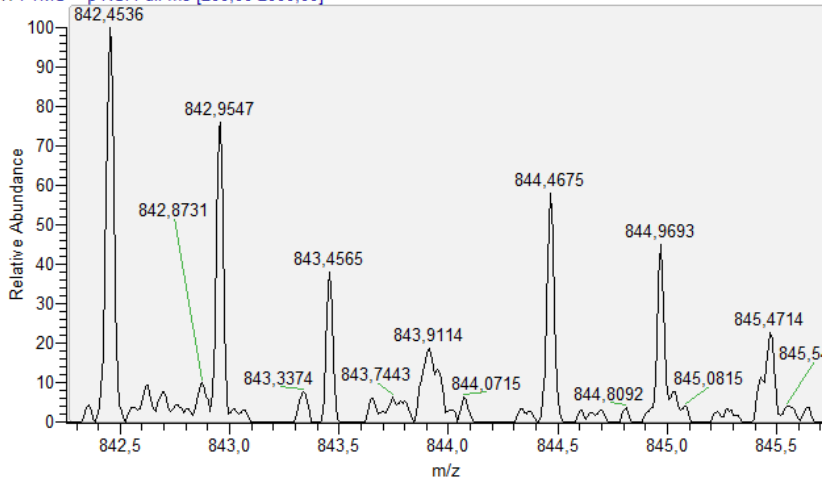

hipocampo\_04 #12922-13068 RT: 64,08-64,63 AV: 20 NL: 1,31E4  
T: FTMS + p NSI Full ms [200,00-2000,00]

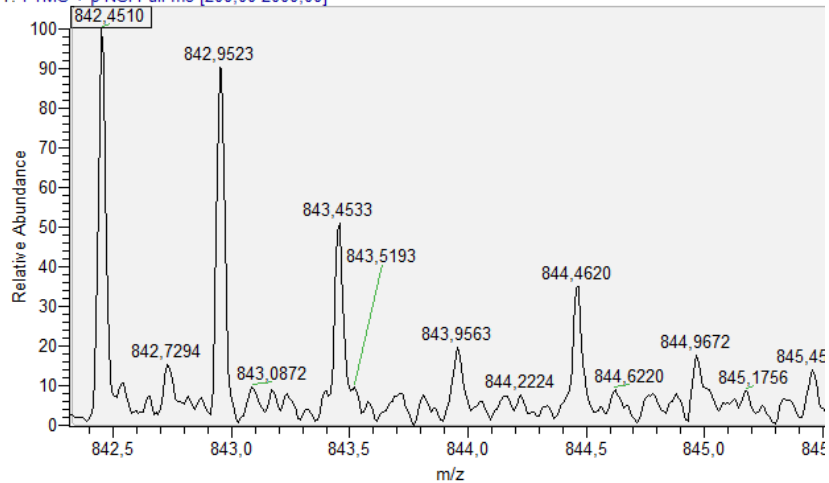



# GDVNTDRPGLLDL 2+

hipocampo\_01 #8431-8720 RT: 53.03-54.70 AV: 32 NL: 1,98E4  
T: FTMS + p NSI Full ms [200,00-2000,00]

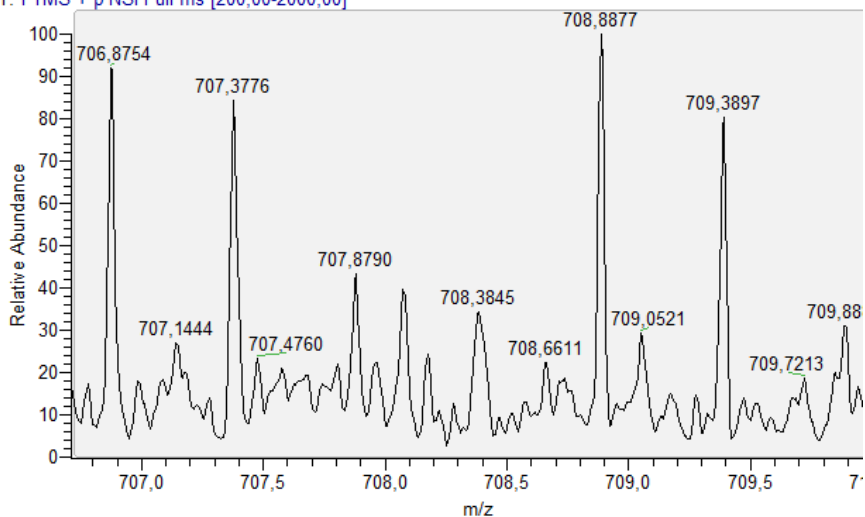

hipocampo\_02 #8057-8152 RT: 51.67-52,15 AV: 9 NL: 4,98E4  
T: FTMS + p NSI Full ms [200,00-2000,00]

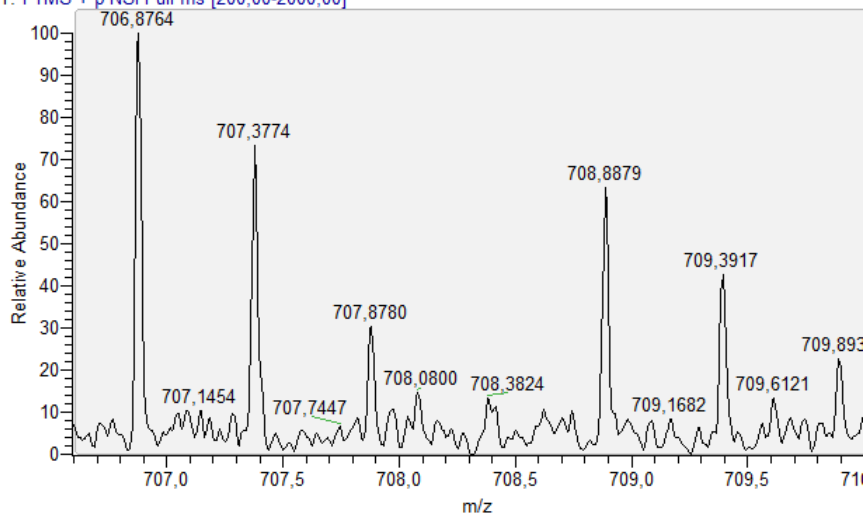

hipocampo\_04 #12128-12339 RT: 60,98-61,80 AV: 37 NL: 2,40E4  
T: FTMS + p NSI Full ms [200,00-2000,00]

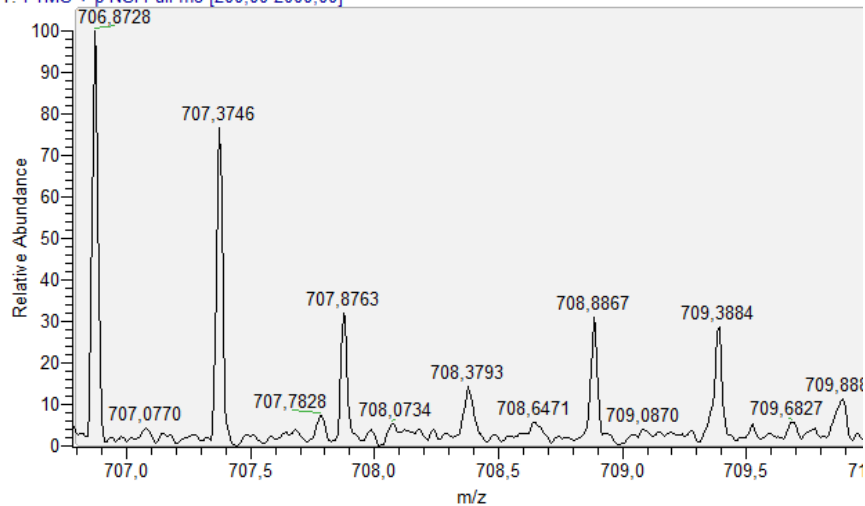

# KQATVGDVNTDRPGLLDL 2+

hipocampo\_01 #7749 RT: 49.03 AV: 1 NL: 8.01E4  
T: FTMS + p NSI Full ms [200.00-2000.00]

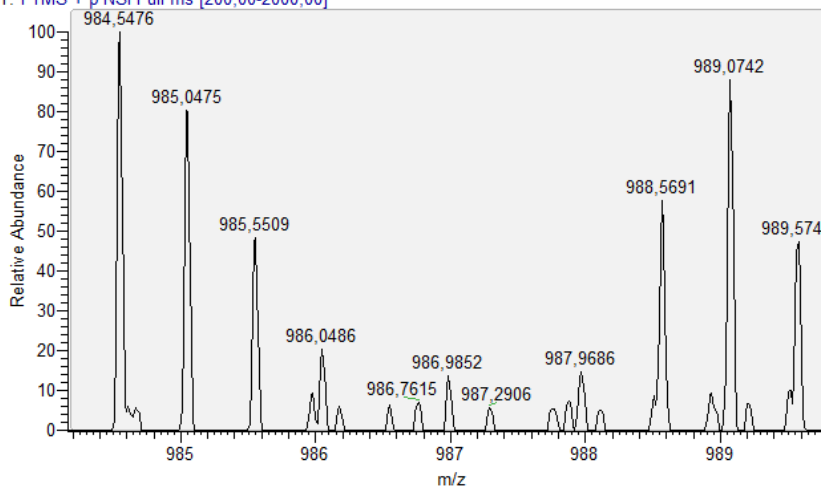

hipocampo\_02 #7292-7674 RT: 47.09-49.33 AV: 34 NL: 2.47E4  
T: FTMS + p NSI Full ms [200.00-2000.00]

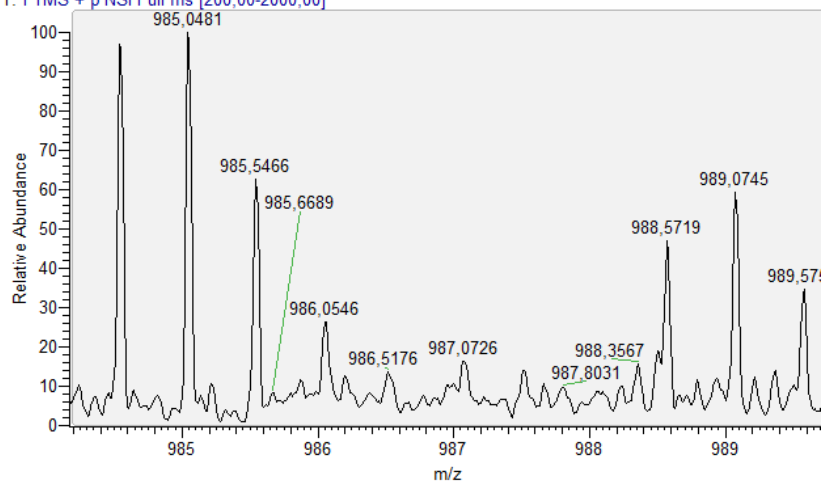

hipocampo\_04 #11141 RT: 57.10 AV: 1 NL: 5.75E4  
T: FTMS + p NSI Full ms [200.00-2000.00]

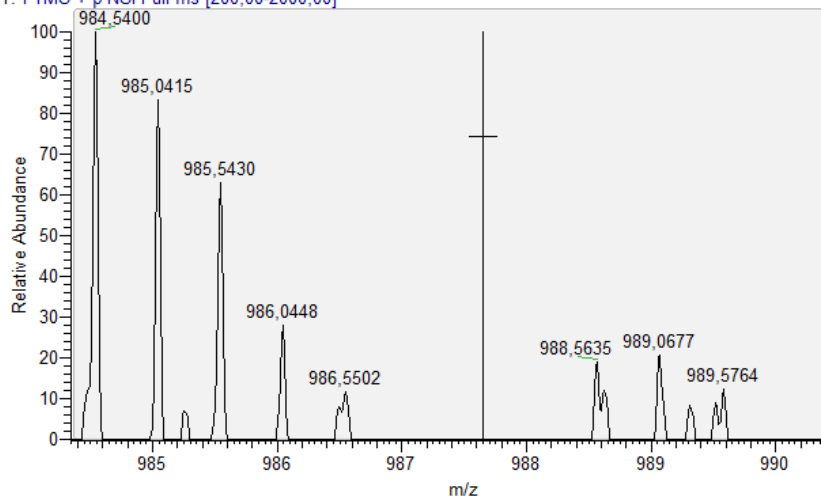

# KQATVGDVNTDRPGLLDL 3+

hipocampo\_01 #7704-8136 RT: 48,78-51,31 AV: 38 NL: 6,98E4  
T: FTMS + p NSI Full ms [200,00-2000,00]

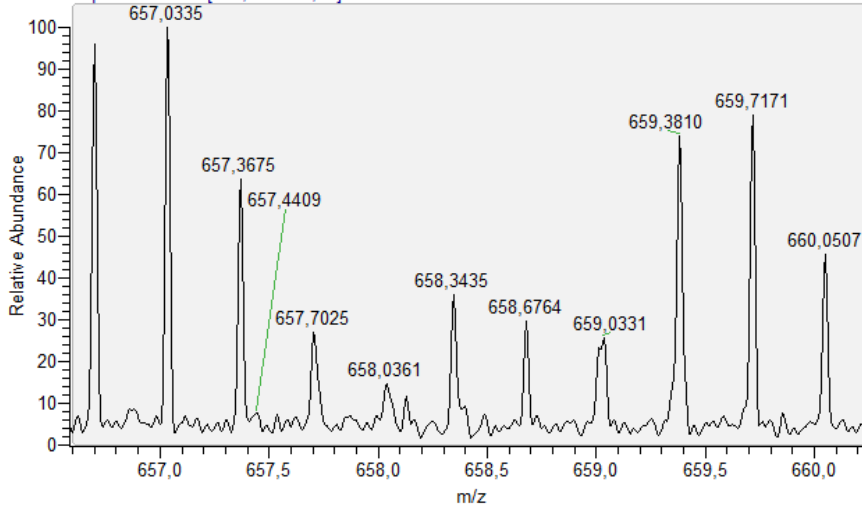

hipocampo\_02 #7292-7674 RT: 47,09-49,33 AV: 34 NL: 9,42E4  
T: FTMS + p NSI Full ms [200,00-2000,00]

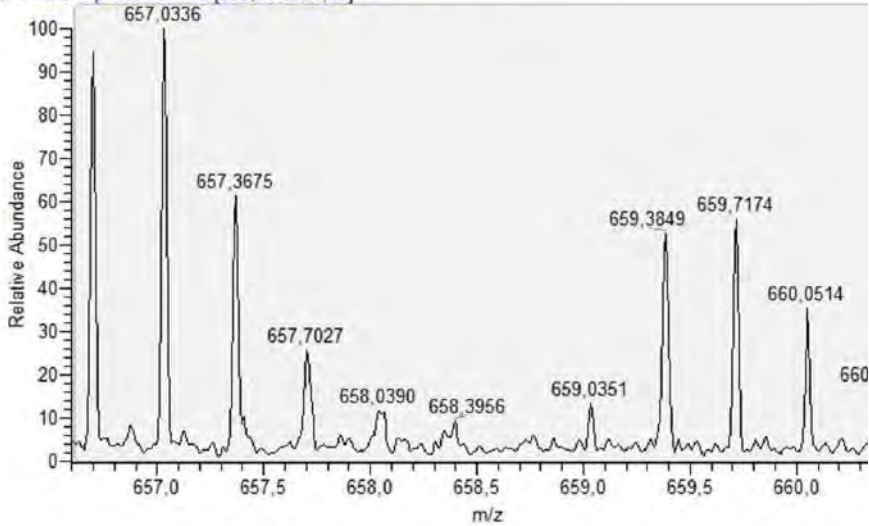

hipocampo\_04 #11141 RT: 57,10 AV: 1 NL: 5,11E5  
T: FTMS + p NSI Full ms [200,00-2000,00]

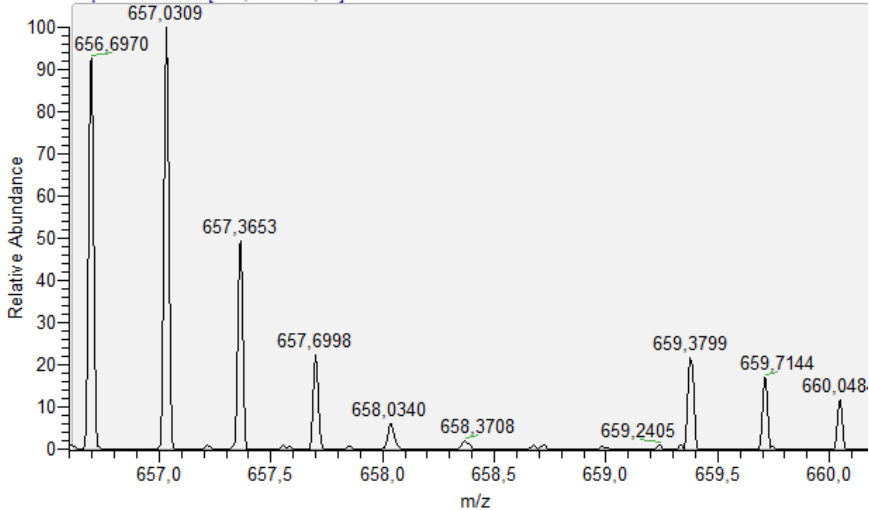

# TVGDVNTDRPGLLDL 2+

hipocampo\_01 #9388 RT: 58,71 AV: 1 NL: 1,94E5  
T: FTMS + p NSI Full ms [200,00-2000,00]

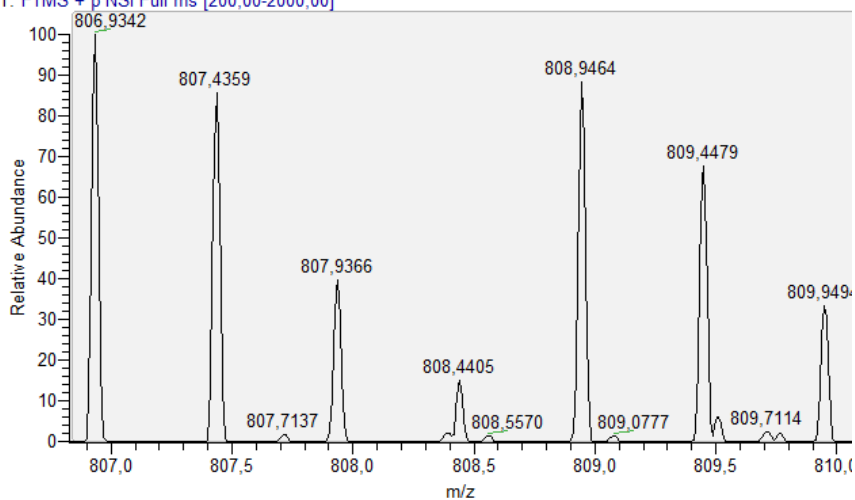

hipocampo\_02 #8822-8965 RT: 56,19-56,95 AV: 16 NL: 8,24E4  
T: FTMS + p NSI Full ms [200,00-2000,00]

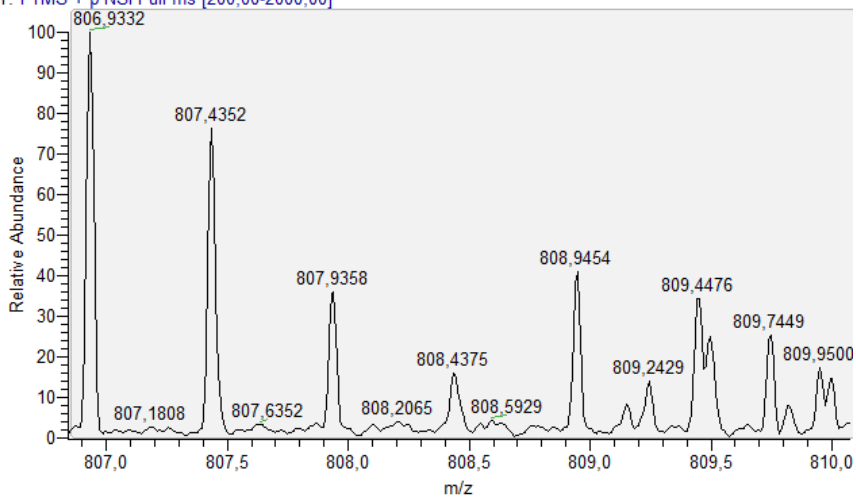

hipocampo\_04 #12847 RT: 63,79 AV: 1 NL: 2,89E5  
T: FTMS + p NSI Full ms [200,00-2000,00]

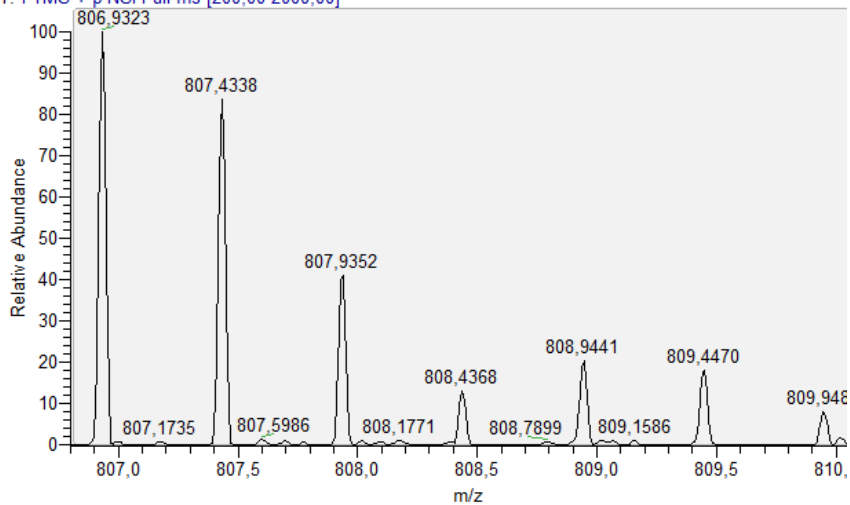

# VEKVDELKKKYGI 2+

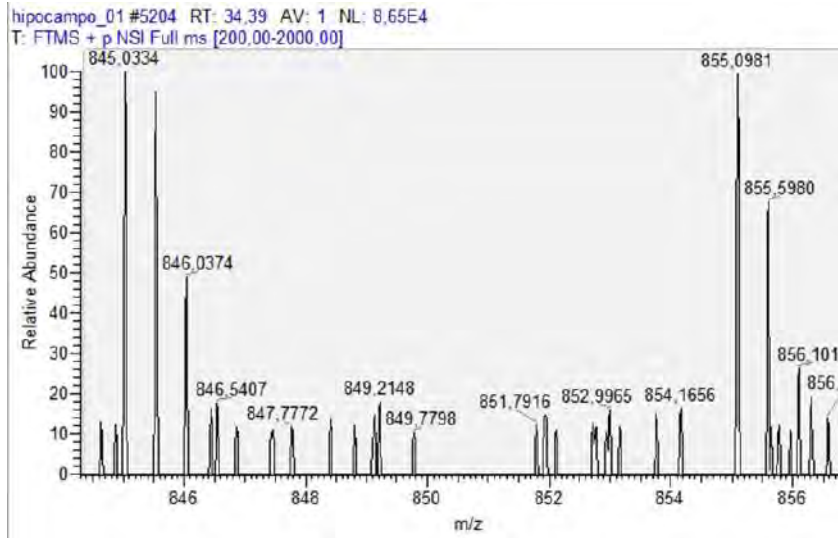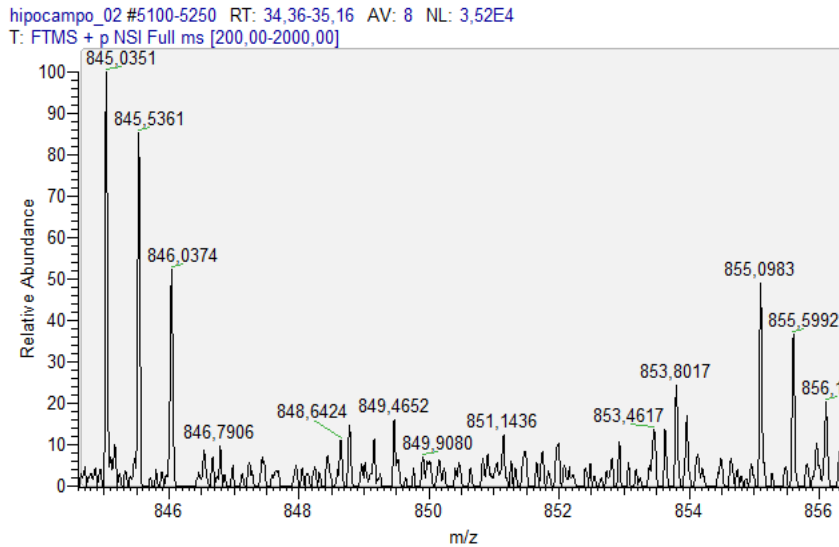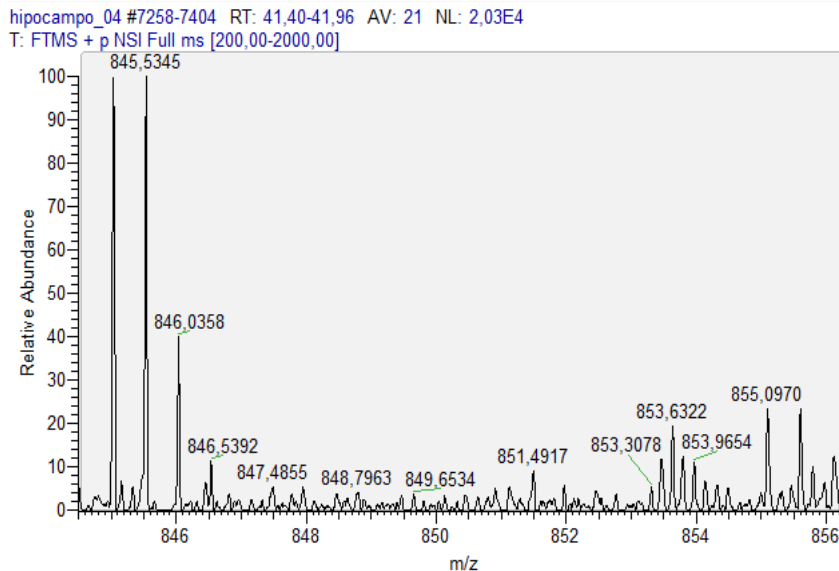

# VEKVDLKKKYGI 3+

hipocampo\_01 #5204 RT: 34.39 AV: 1 NL: 4,64E5  
T: FTMS + p NSI Full ms [200,00-2000,00]

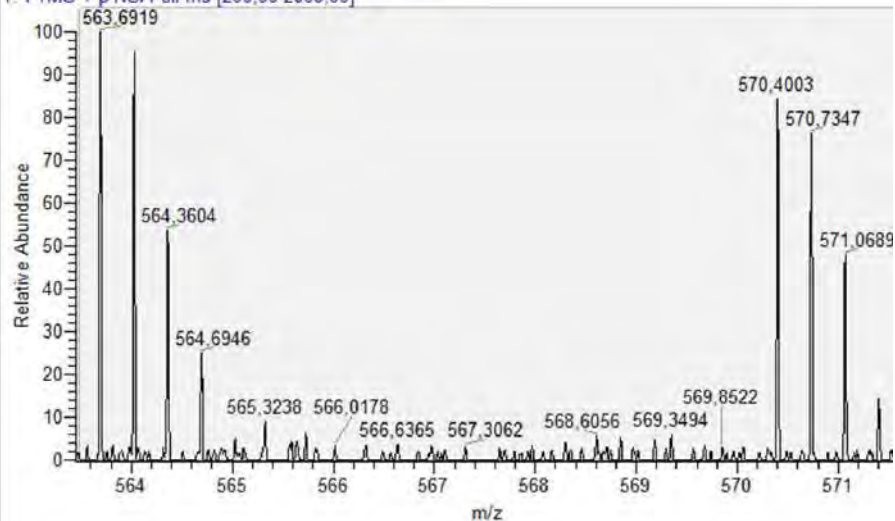

hipocampo\_02 #5100-5250 RT: 34.36-35.16 AV: 8 NL: 1,70E5  
T: FTMS + p NSI Full ms [200,00-2000,00]

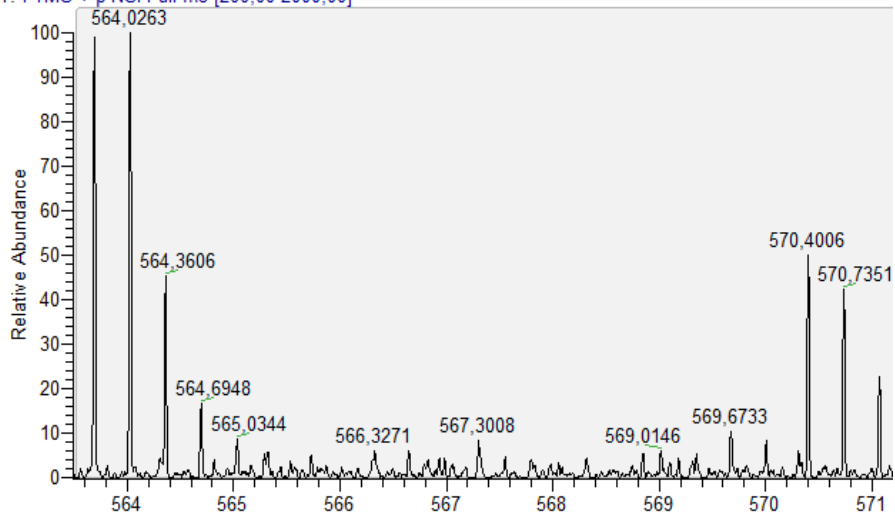

hipocampo\_04 #7258-7404 RT: 41.40-41.96 AV: 21 NL: 1,55E5  
T: FTMS + p NSI Full ms [200,00-2000,00]

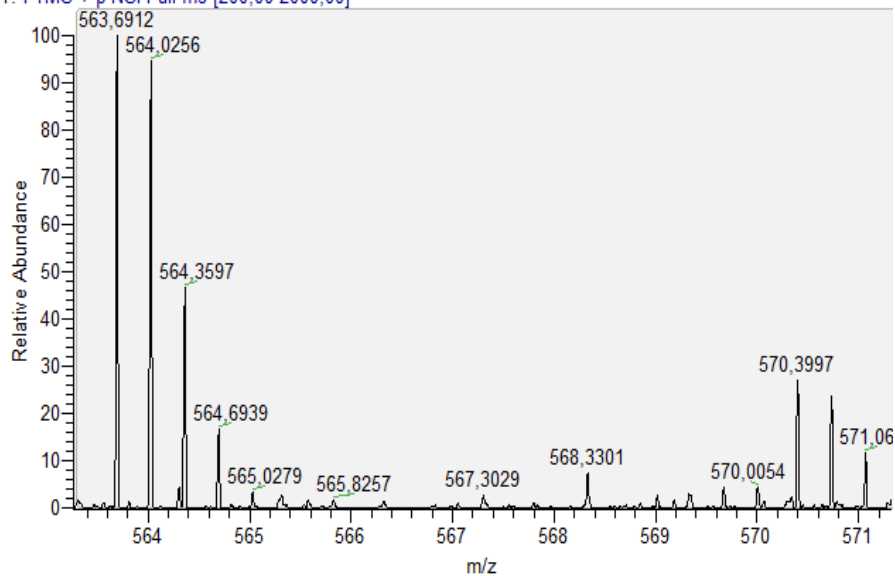

# KGNDISSGTVL 2+

hipocampo\_01 #4615-4718 RT: 31,23-31,76 AV: 6 NL: 5,96E5  
T: FTMS + p NSI Full ms [200,00-2000,00]

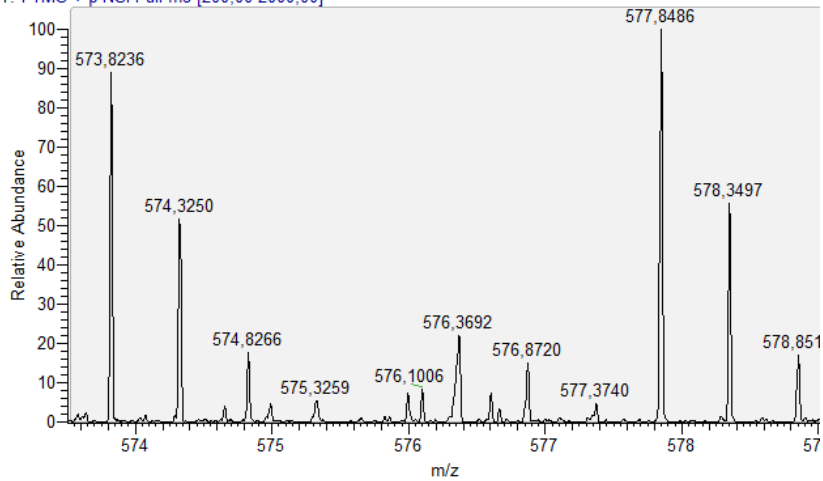

hipocampo\_02 #4571-4632 RT: 31,49-31,61 AV: 2 NL: 1,66E6  
T: FTMS + p NSI Full ms [200,00-2000,00]

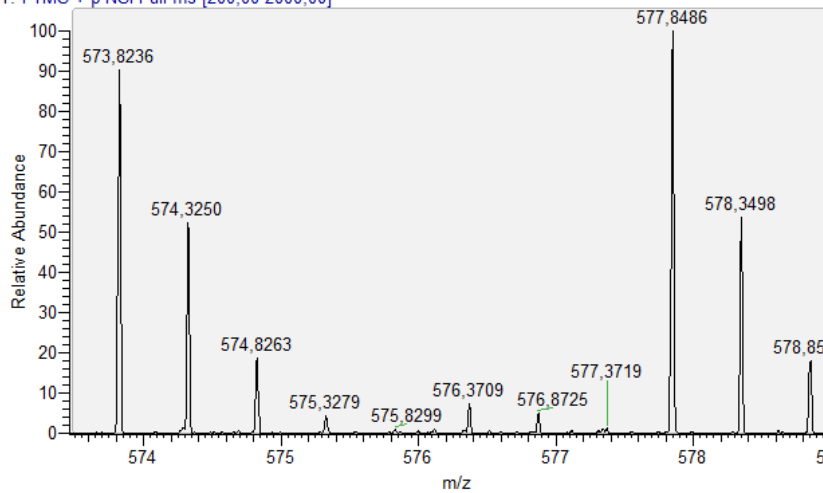

hipocampo\_04 #6353 RT: 37,46 AV: 1 NL: 2,64E5  
T: FTMS + p NSI Full ms [200,00-2000,00]

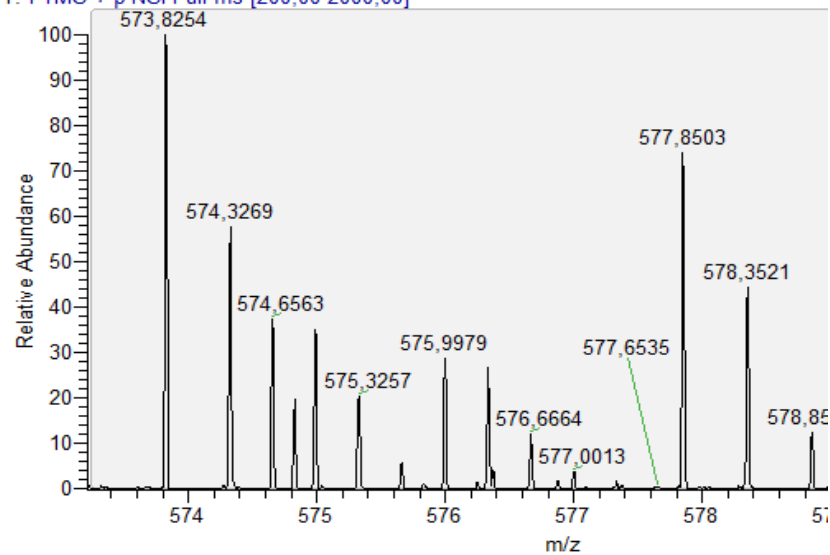

# GLDPGKLYTL 2+

hipocampo\_01 #8481-8720 RT: 53.33-54.70 AV: 27 NL: 1,23E5  
T: FTMS + p NSI Full ms [200,00-2000,00]

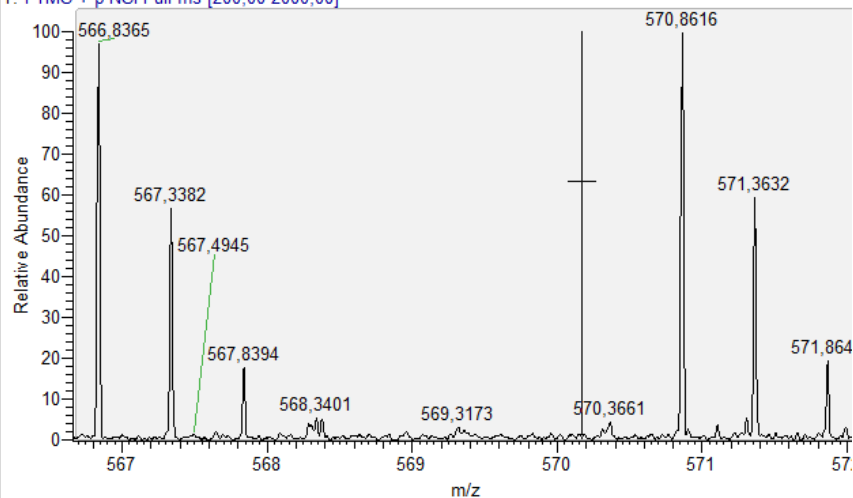

hipocampo\_02 #8057-8246 RT: 51.67-52.73 AV: 17 NL: 1,60E5  
T: FTMS + p NSI Full ms [200,00-2000,00]

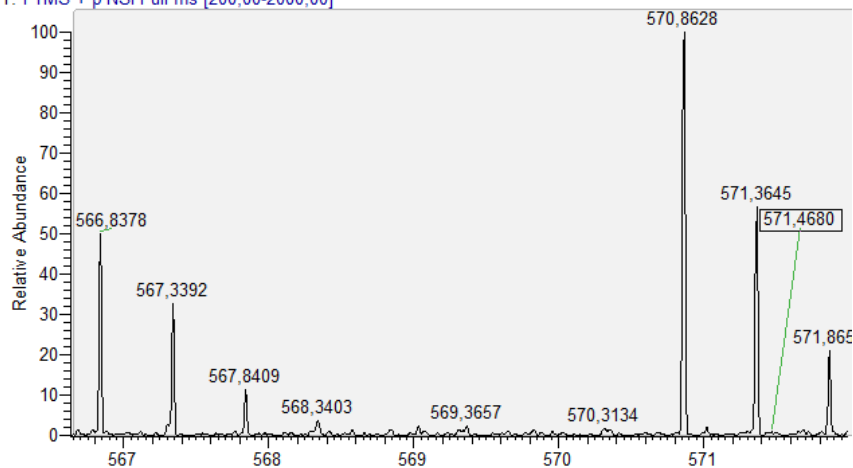

hipocampo\_04 #11982-12339 RT: 60.41-61.80 AV: 58 NL: 1,87E4  
T: FTMS + p NSI Full ms [200,00-2000,00]

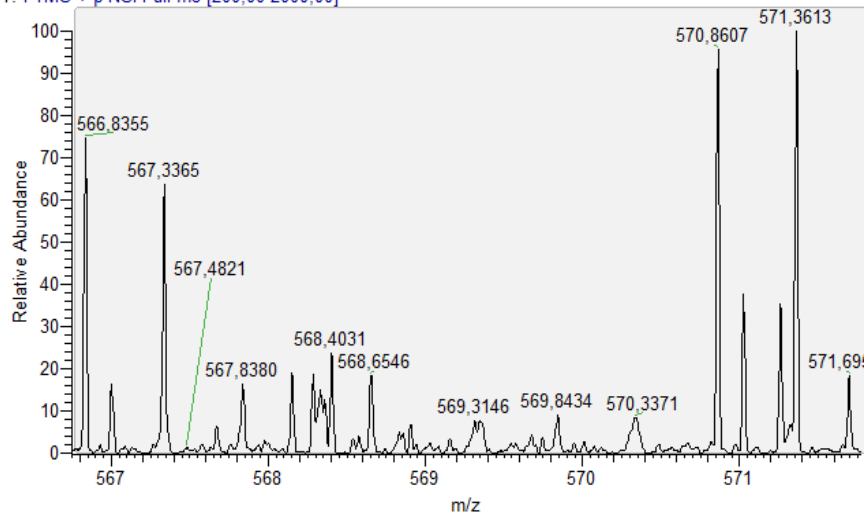



# DGLDPGKLYTL 2+

hipocampo\_01 #9480-9854 RT: 59,28-61,50 AV: 45 NL: 1,04E4  
T: FTMS + p NSI Full ms [200,00-2000,00]

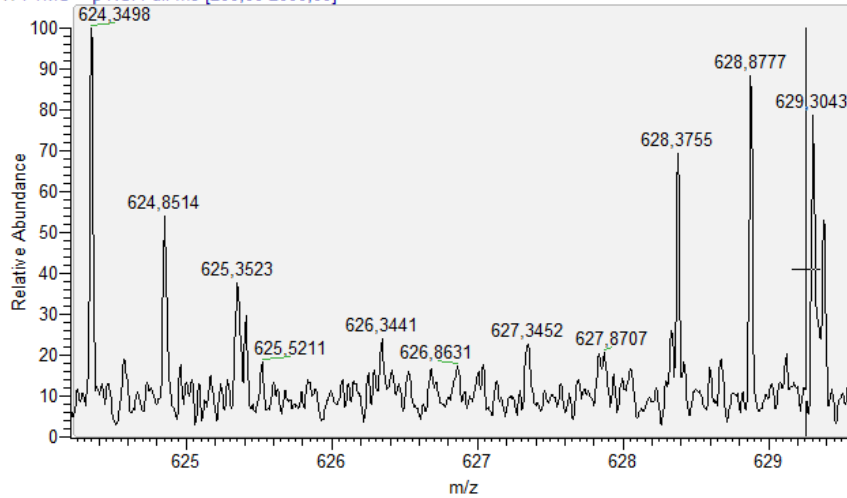

hipocampo\_02 #9012-9294 RT: 57,31-58,95 AV: 31 NL: 1,05E4  
T: FTMS + p NSI Full ms [200,00-2000,00]

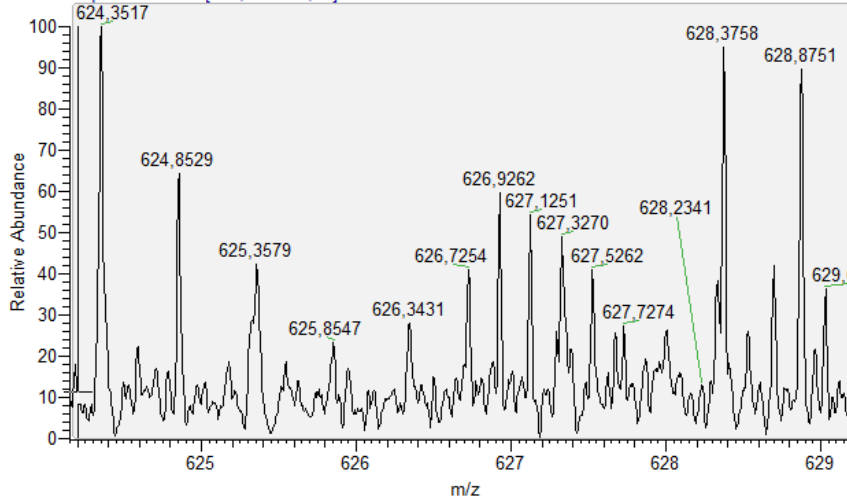

hipocampo\_04 #12732-12883 RT: 63,37-63,92 AV: 22 NL: 2,41E4  
T: FTMS + p NSI Full ms [200,00-2000,00]

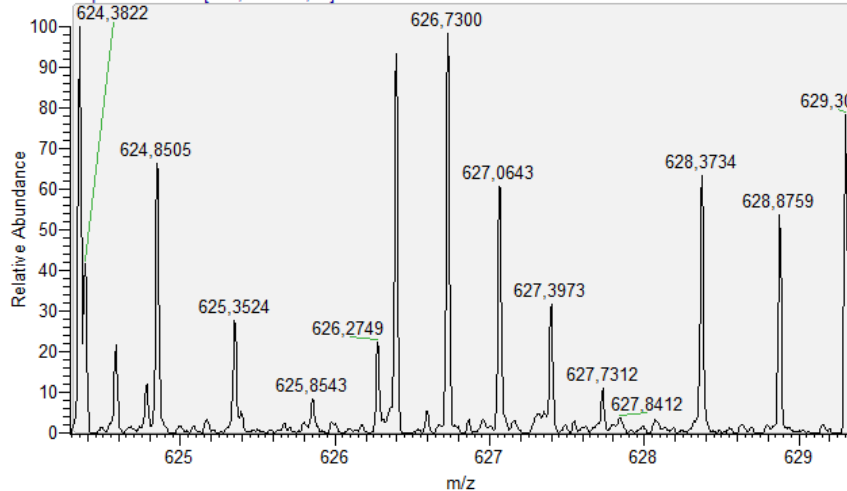

# DDYVPKLYEQLSGK 3+

hipocampo\_01 #8816-9006 RT: 55,32-56,42 AV: 23 NL: 2,81E4  
T: FTMS + p NSI Full ms [200,00-2000,00]

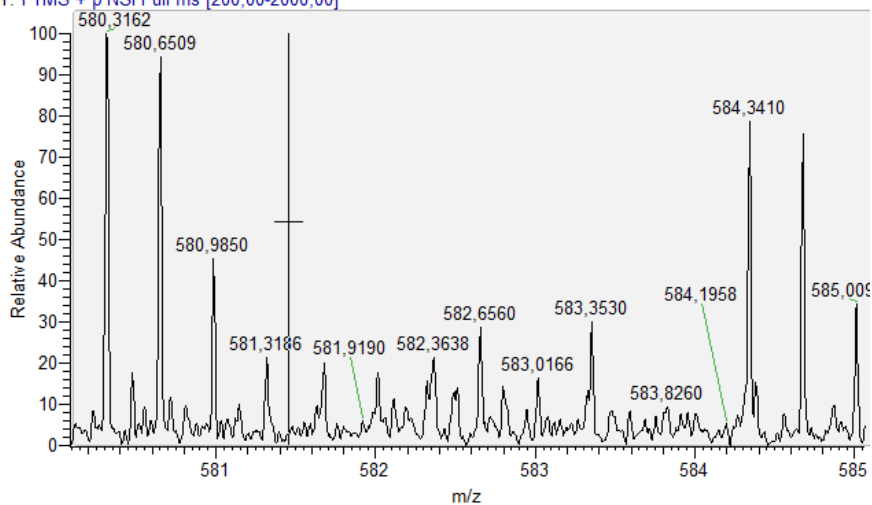

hipocampo\_02 #8386 RT: 53,57 AV: 1 NL: 4,42E4  
T: FTMS + p NSI Full ms [200,00-2000,00]

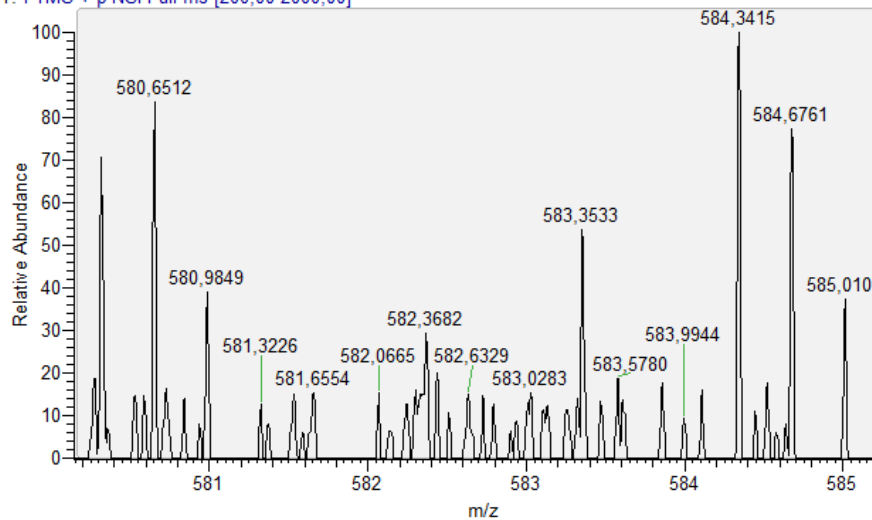

hipocampo\_04 #11993 RT: 60,44 AV: 1 NL: 3,95E4  
T: FTMS + p NSI Full ms [200,00-2000,00]

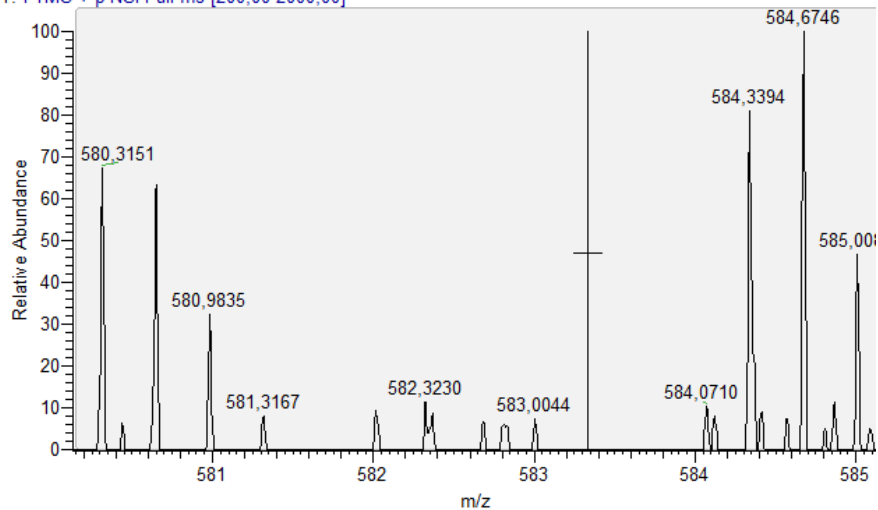

# AGVTVDDELGKVLTPQTQV 2+

hipocampo\_01 #10411-10600 RT: 65,02-65,94 AV: 10 NL: 2,47E4  
T: FTMS + p NSI Full ms [200,00-2000,00]

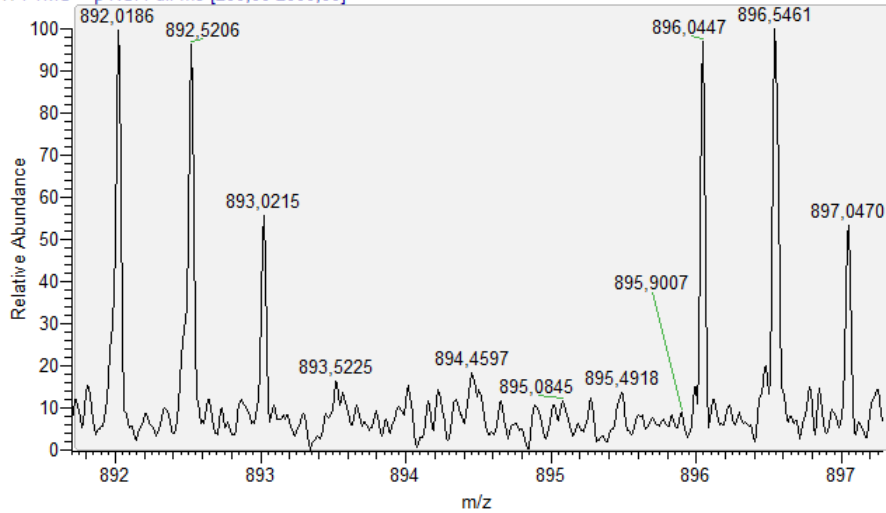

hipocampo\_02 #10046-10139 RT: 63,60-64,07 AV: 7 NL: 1,14E5  
T: FTMS + p NSI Full ms [200,00-2000,00]

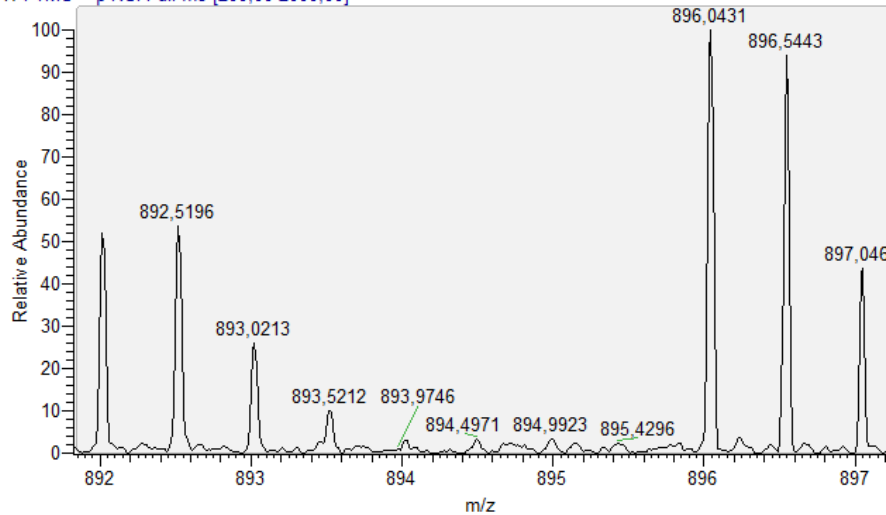

hipocampo\_04 #13577-13940 RT: 66,64-68,04 AV: 52 NL: 7,85E3  
T: FTMS + p NSI Full ms [200,00-2000,00]

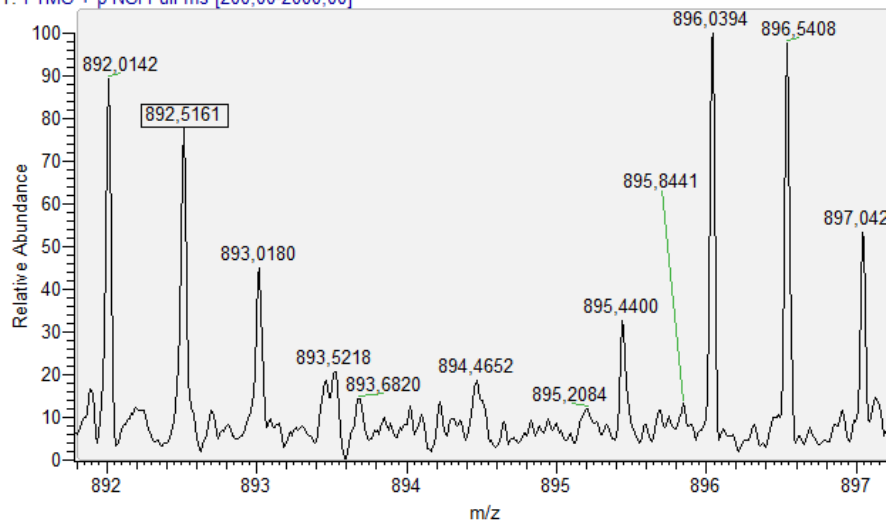

# SGPFGQIFRPDNF 2+

hipocampo\_01 #10622 RT: 66.20 AV: 1 NL: 7,91E4  
T: FTMS + p NSI Full ms [200,00-2000,00]

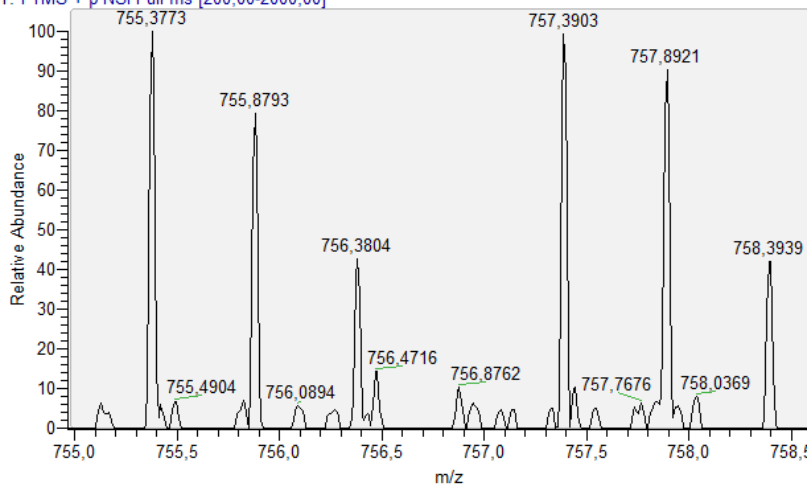

hipocampo\_02 #10371-10511 RT: 65.62-66,31 AV: 8 NL: 1,45E4  
T: FTMS + p NSI Full ms [200,00-2000,00]

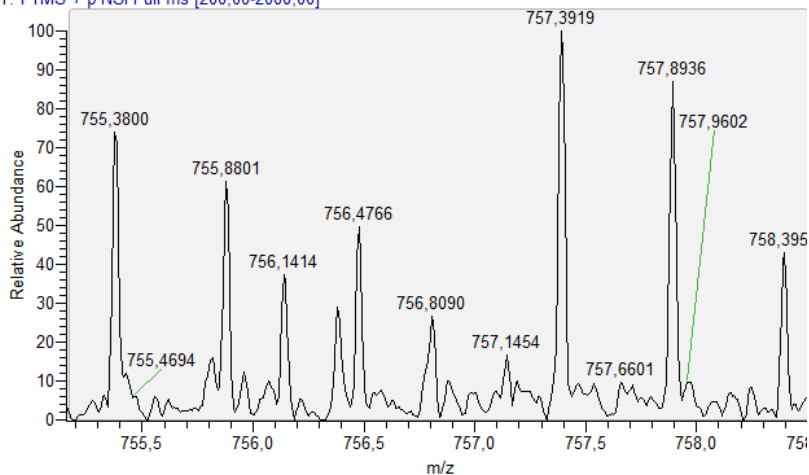

hipocampo\_04 #14339-14535 RT: 69,63-70,37 AV: 20 NL: 1,74E4  
T: FTMS + p NSI Full ms [200,00-2000,00]

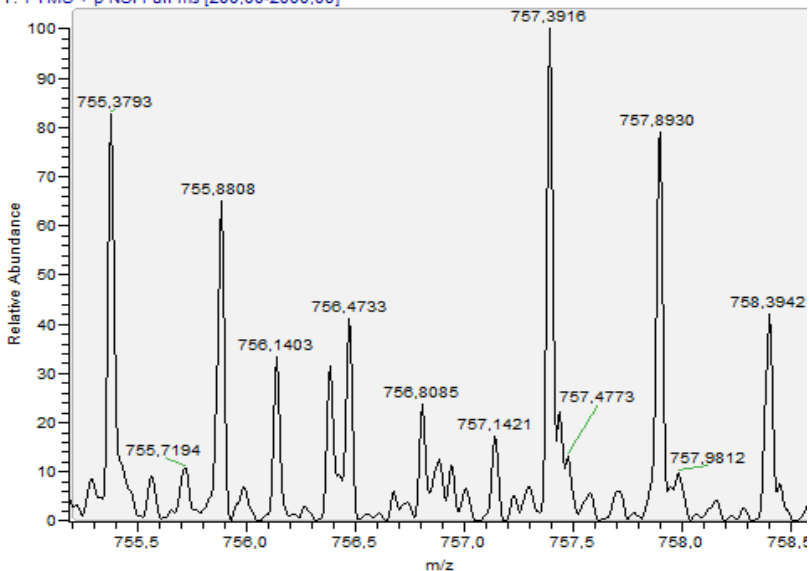

# DDEESEAQGPK 2+

hipocampo\_01 #2110-2150 RT: 17.26-17.40 AV: 2 NL: 6,50E3  
T: FTMS + p NSI Full ms [200,00-2000,00]

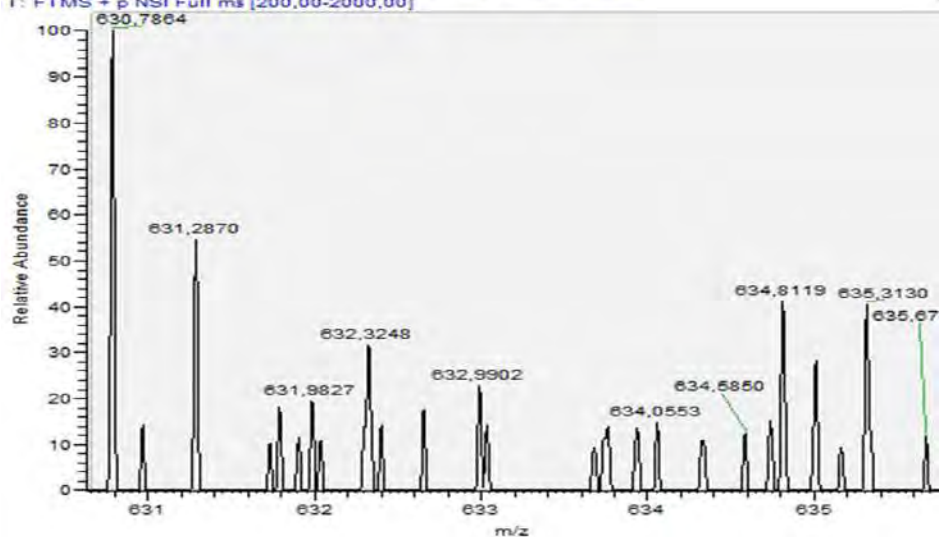

hipocampo\_04 #2362-2501 RT: 21.11-21.85 AV: 56 NL: 4,05E3  
T: FTMS + p NSI Full ms [200,00-2000,00]

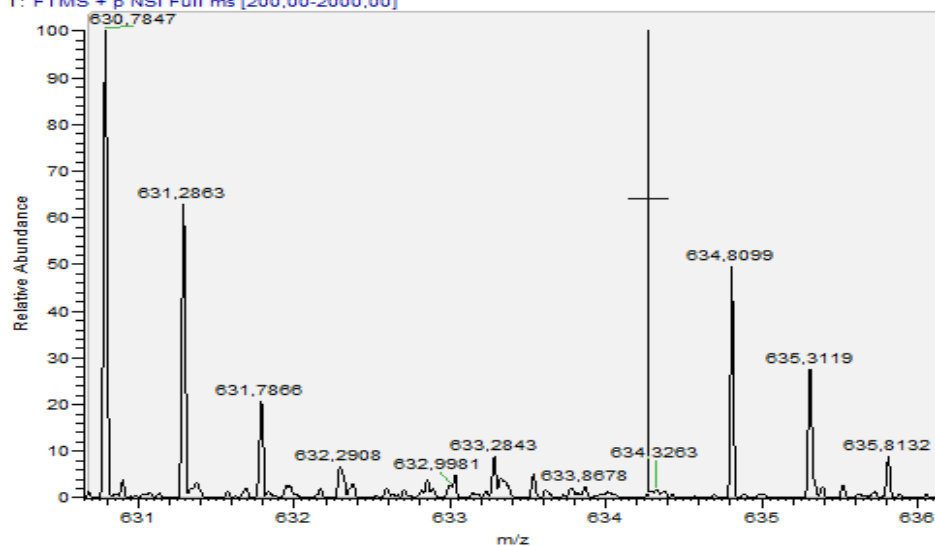

# SPQLEDEAKELQ 2+

hipocampo\_01 #5670-6023 RT: 36,97-38,77 AV: 20 NL: 8,28E5  
T: FTMS + p NSI Full ms [200,00-2000,00]

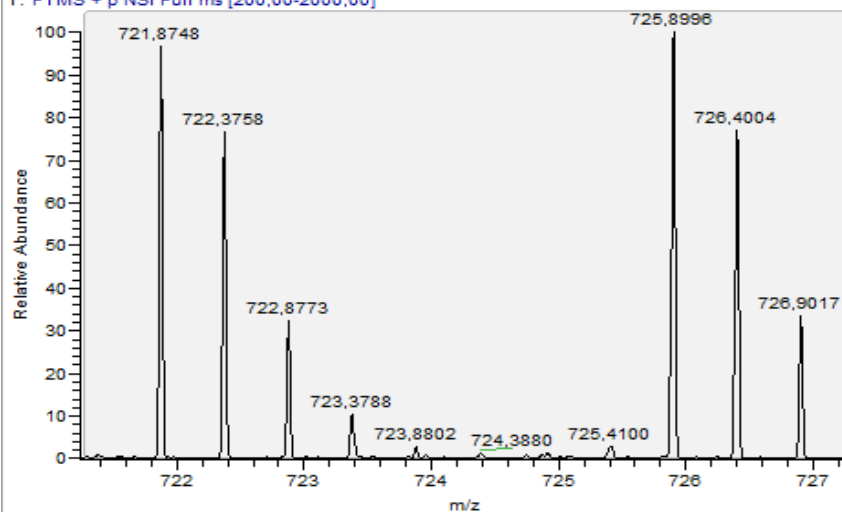

hipocampo\_02 #5523-5790 RT: 36,67-38,10 AV: 14 NL: 1,26E6  
T: FTMS + p NSI Full ms [200,00-2000,00]

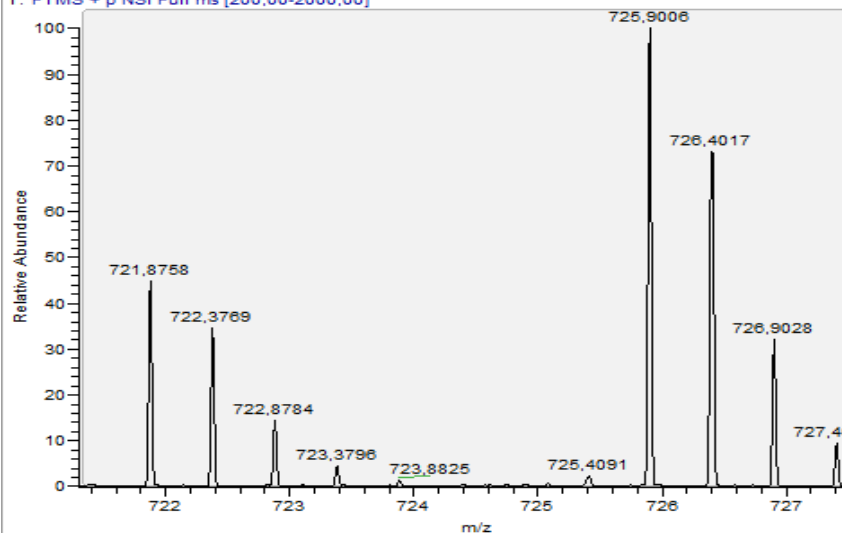

hipocampo\_04 #7922 RT: 44,10 AV: 1 NL: 4,67E4  
T: FTMS + p NSI Full ms [200,00-2000,00]

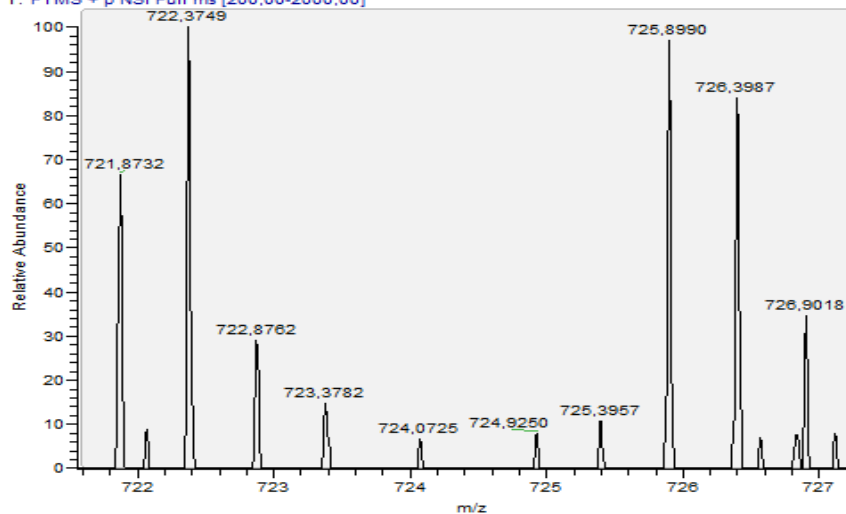

## FDITADDEPLGRVSF 2+

hipocampo\_01 #10779-10907 RT: 67,18-67,93 AV: 8 NL: 1,26E4

T: FTMS + p NSI Full ms [200,00-2000,00]

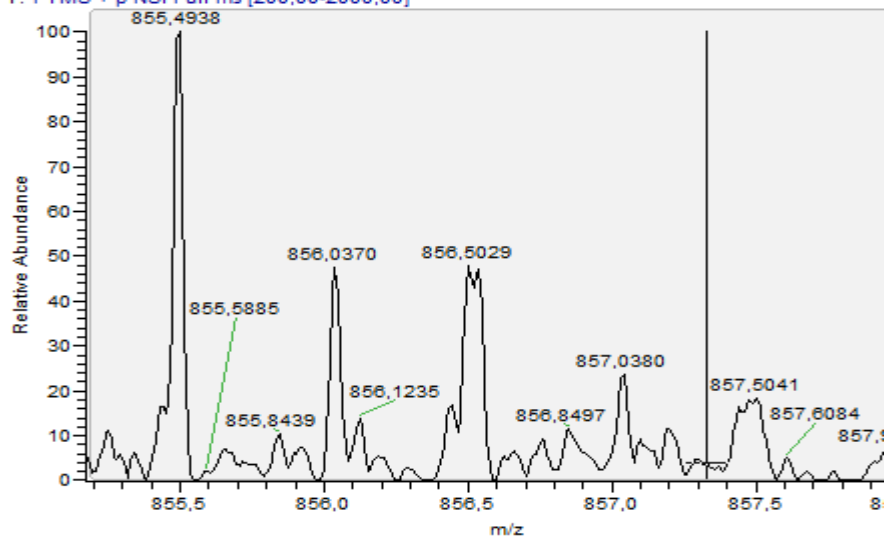

hipocampo\_02 #10685-10754 RT: 67,49-67,77 AV: 4 NL: 1,56E4

T: FTMS + p NSI Full ms [200,00-2000,00]

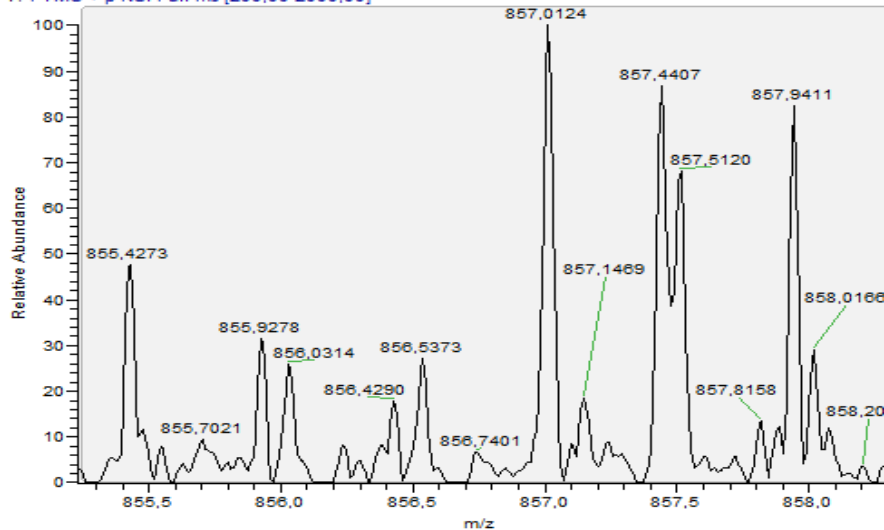

hipocampo\_04 #14627-14824 RT: 70,77-71,47 AV: 19 NL: 5,41E3

T: FTMS + p NSI Full ms [200,00-2000,00]

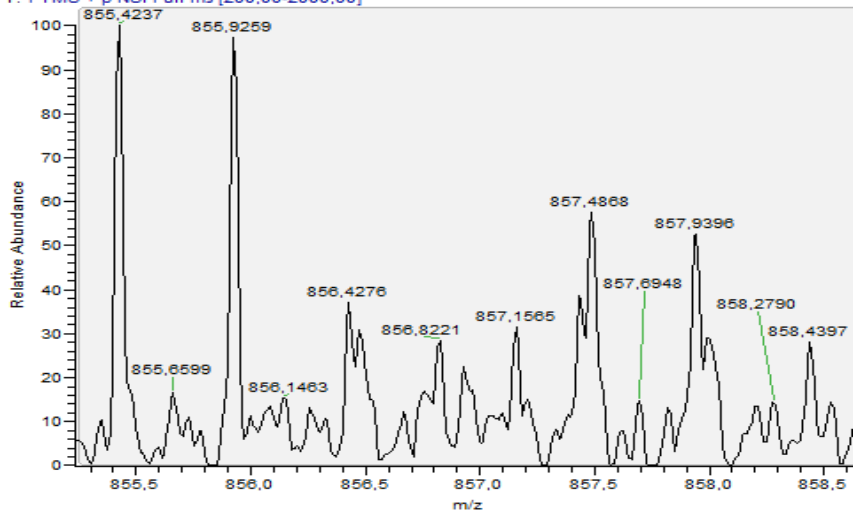

# ITADDEPLGRVSF 2+

hipocampo\_01 #8553 RT: 53,74 AV: 1 NL: 1,48E5  
T: FTMS + p NSI Full ms [200,00-2000,00]

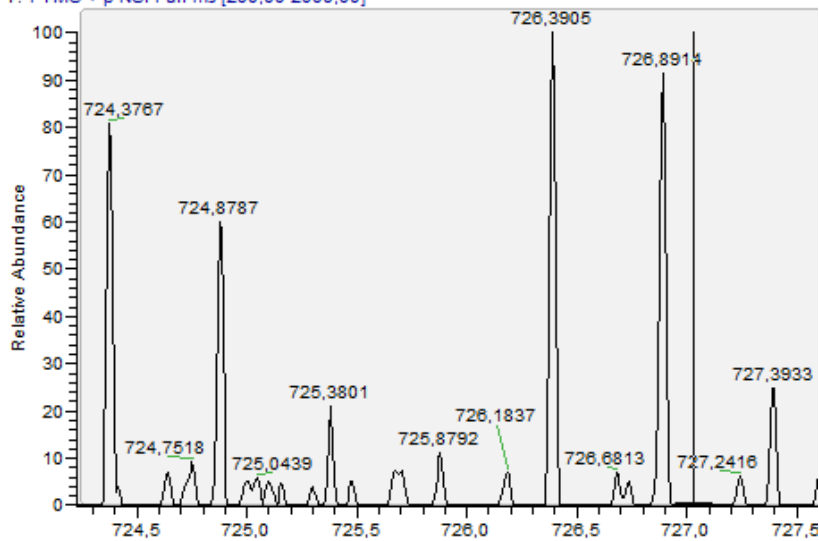

hipocampo\_02 #8098-8285 RT: 51,89-52,94 AV: 16 NL: 6,28E4  
T: FTMS + p NSI Full ms [200,00-2000,00]

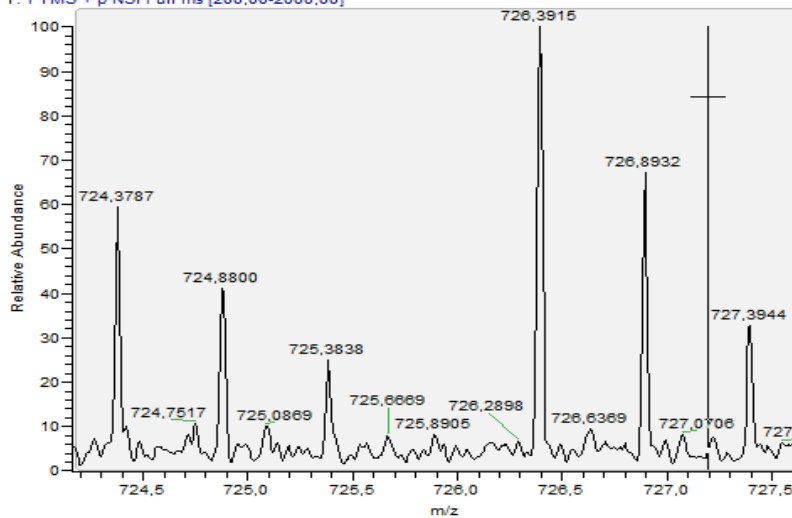

hipocampo\_04 #11688-12070 RT: 59,27-60,74 AV: 59 NL: 8,09E3  
T: FTMS + p NSI Full ms [200,00-2000,00]

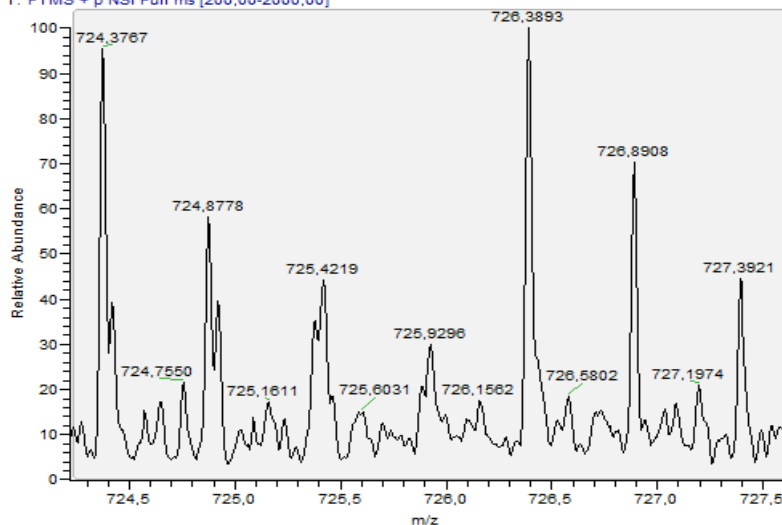



# LFADKVPKTAENF 3+

hipocampo\_01 #6300 RT: 40.44 AV: 1 NL: 1,08E5  
T: FTMS + p NSI Full ms [200,00-2000,00]

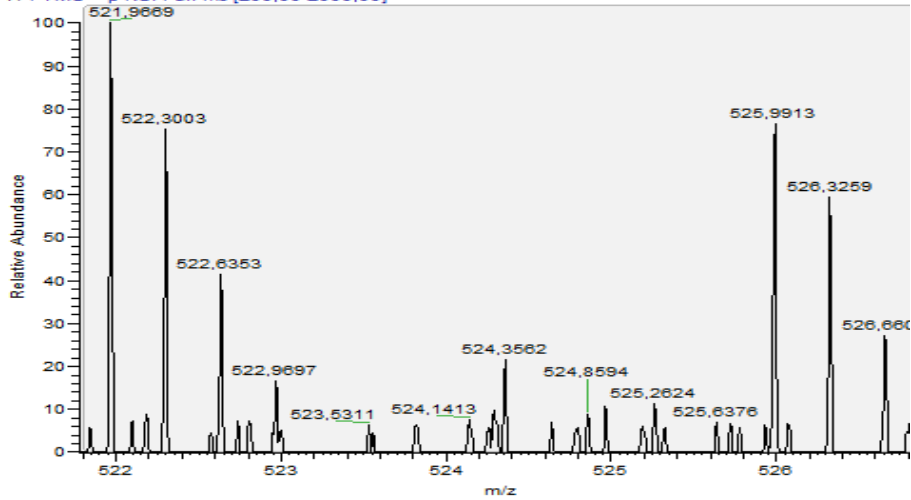

hipocampo\_02 #5925-6115 RT: 38.90-39.97 AV: 13 NL: 8,47E4  
T: FTMS + p NSI Full ms [200,00-2000,00]

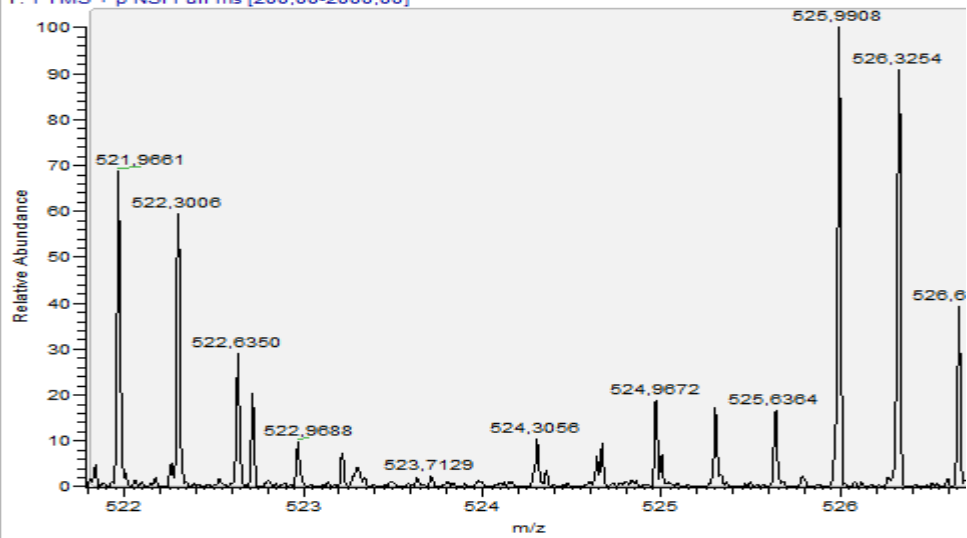

hipocampo\_04 #8644 RT: 47.01 AV: 1 NL: 4,73E4  
T: FTMS + p NSI Full ms [200,00-2000,00]

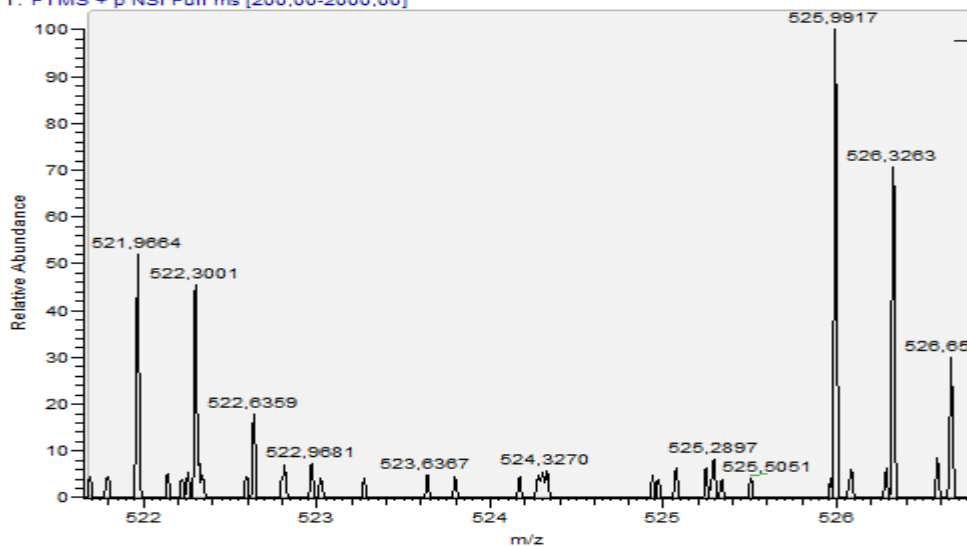

# FHNPHVNPLPTGYEDE 2+

hipocampo\_01 #5599-5811 RT: 36,57-37,64 AV: 15 NL: 2,44E4  
T: FTMS + p NSI Full ms [200,00-2000,00]

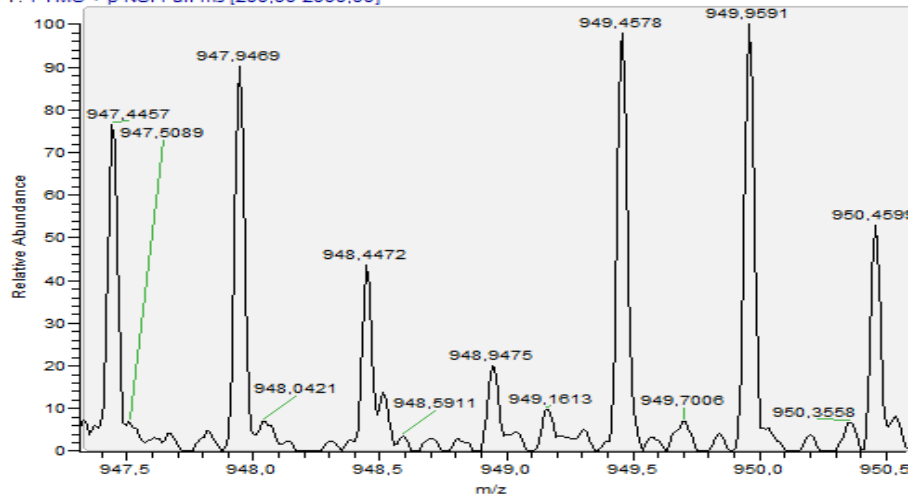

hipocampo\_02 #5523-5722 RT: 36,67-37,76 AV: 11 NL: 2,96E4  
T: FTMS + p NSI Full ms [200,00-2000,00]

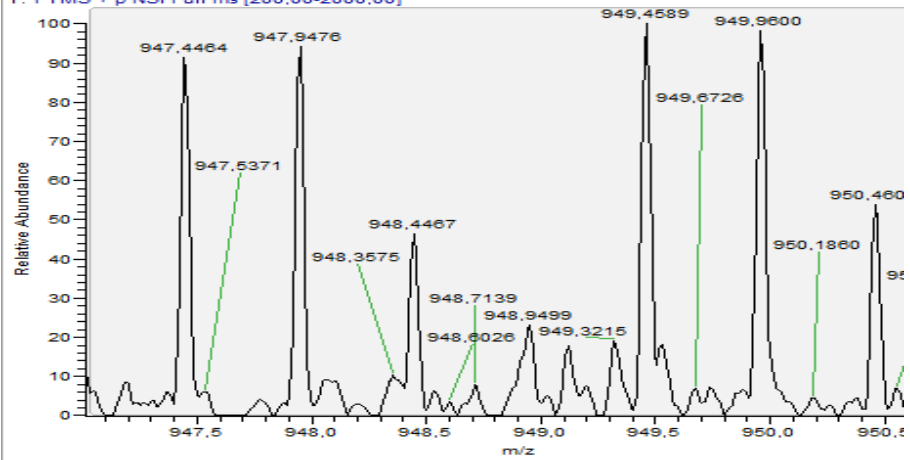

hipocampo\_04 #7915-8378 RT: 44,08-45,93 AV: 77 NL: 7,95E3  
T: FTMS + p NSI Full ms [200,00-2000,00]

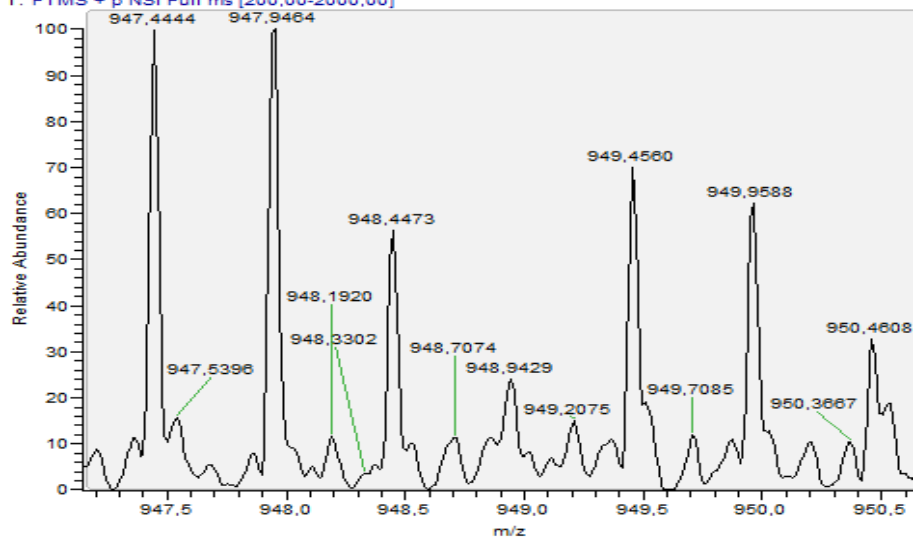

# HNP HVNPLPTGYEDE 2+

hipocampo\_01 #4872-4941 RT: 32,65-32,95 AV: 4 NL: 8,12E4  
T: FTMS + p NSI Full ms [200,00-2000,00]

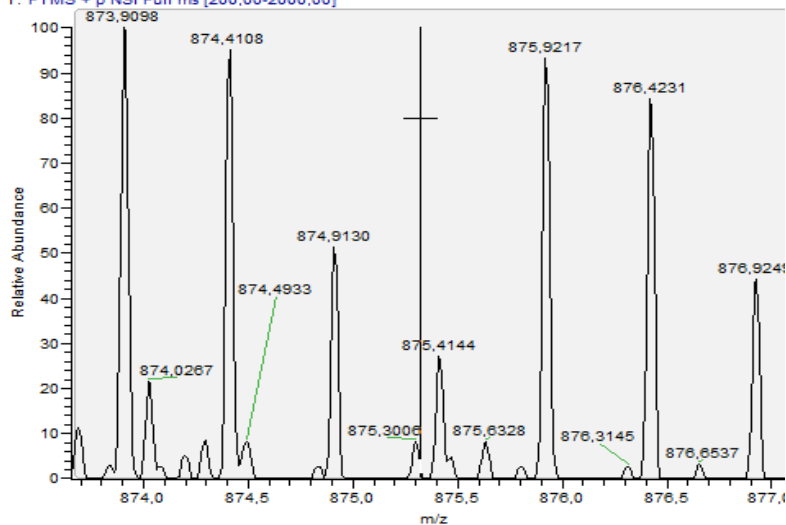

hipocampo\_02 #4657-4859 RT: 31,94-32,95 AV: 13 NL: 2,73E4  
T: FTMS + p NSI Full ms [200,00-2000,00]

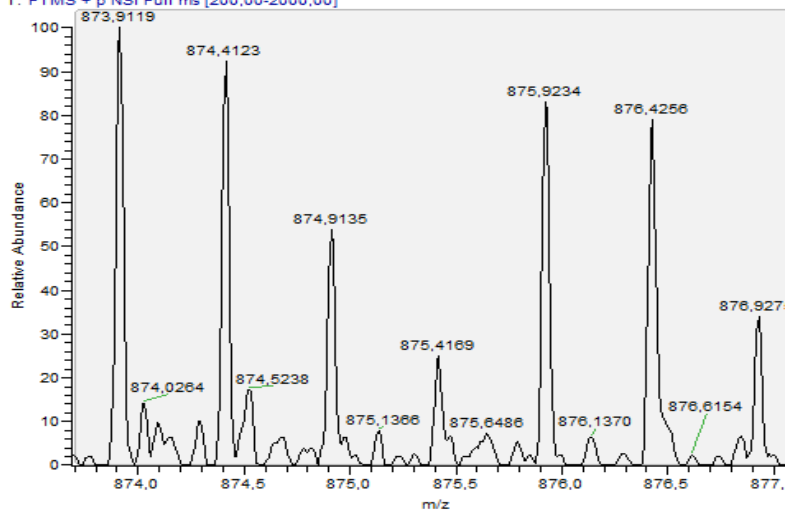

hipocampo\_04 #6343-6679 RT: 37,41-38,89 AV: 97 NL: 1,09E4  
T: FTMS + p NSI Full ms [200,00-2000,00]

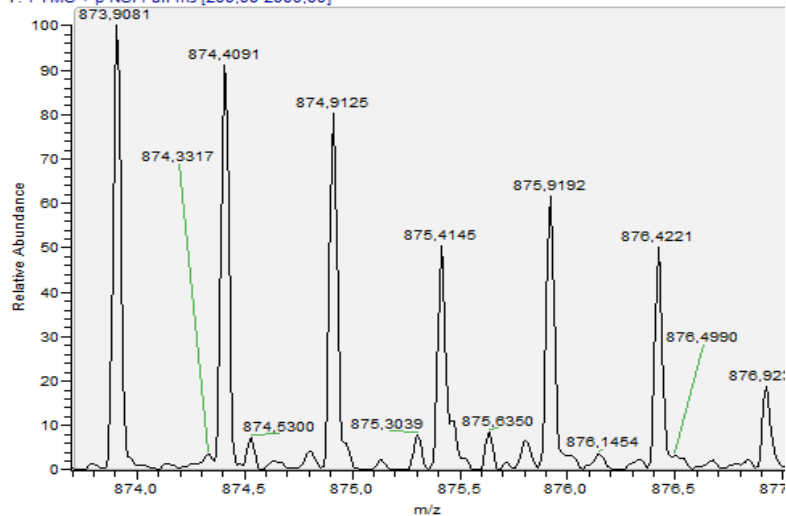

# NPHVNPLPTGYEDE 2+

hipocampo\_01 #5692-5892 RT: 37,08-38,14 AV: 12 NL: 4,36E4  
T: FTMS + p NSI Full ms [200,00-2000,00]

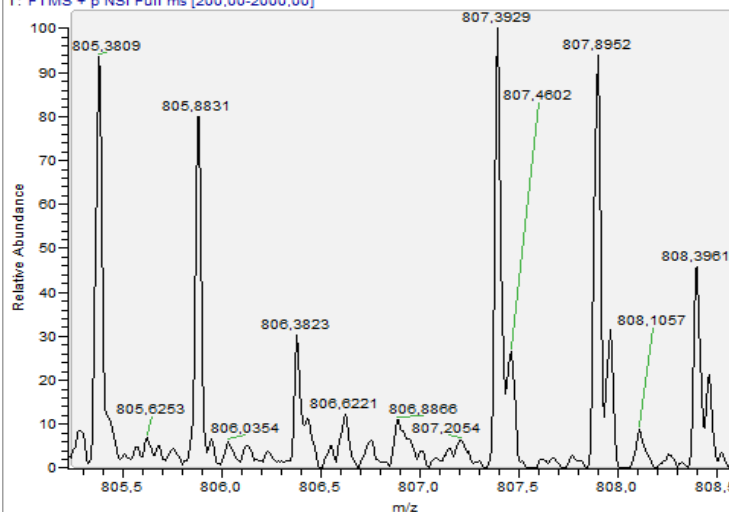

hipocampo\_02 #5523-5656 RT: 36,67-37,40 AV: 8 NL: 4,13E4  
T: FTMS + p NSI Full ms [200,00-2000,00]

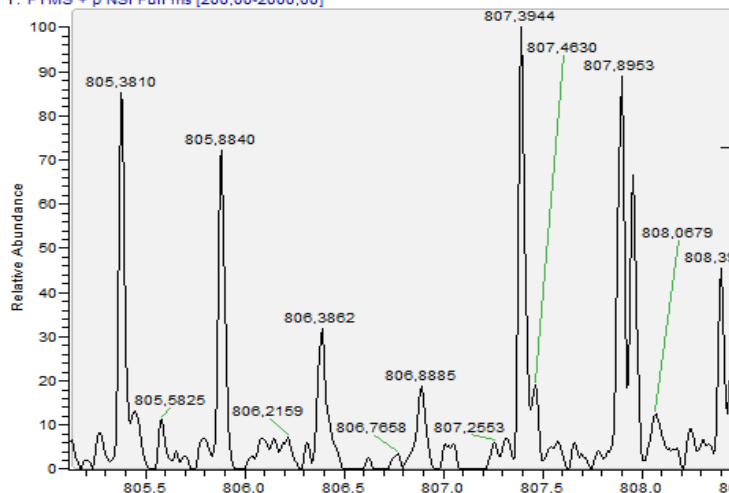

hipocampo\_04 #7734-7915 RT: 43,33-44,06 AV: 37 NL: 2,46E4  
T: FTMS + p NSI Full ms [200,00-2000,00]

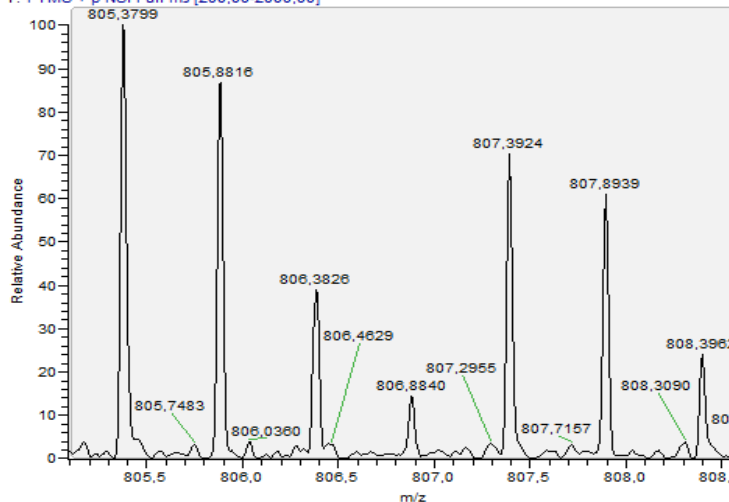

# SLSAASAPLVETSTPLRL 2+

hipocampo\_01 #10391-10577 RT: 64,90-65,85 AV: 10 NL: 3,32E4  
T: FTMS + p NSI Full ms [200,00-2000,00]

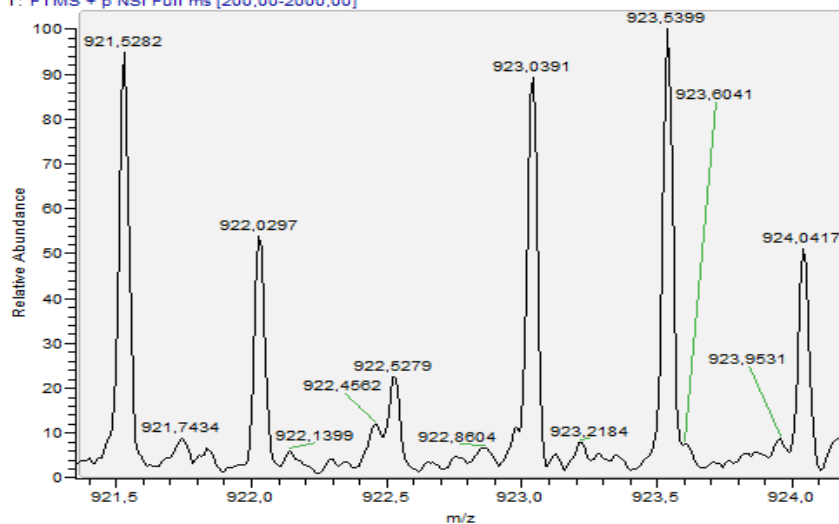

hipocampo\_02 #9831-10076 RT: 62,30-63,60 AV: 15 NL: 7,18E4  
T: FTMS + p NSI Full ms [200,00-2000,00]

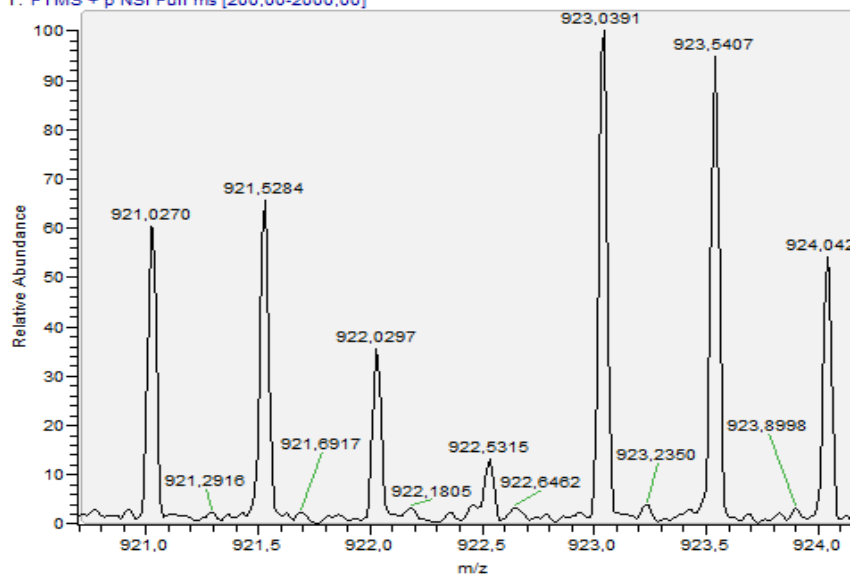

# AQATGKPAQYIA 2+

hipocampo\_01 #3700-4053 RT: 26,36-28,10 AV: 18 NL: 3,88E4  
T: FTMS + p NSI Full ms [200,00-2000,00]

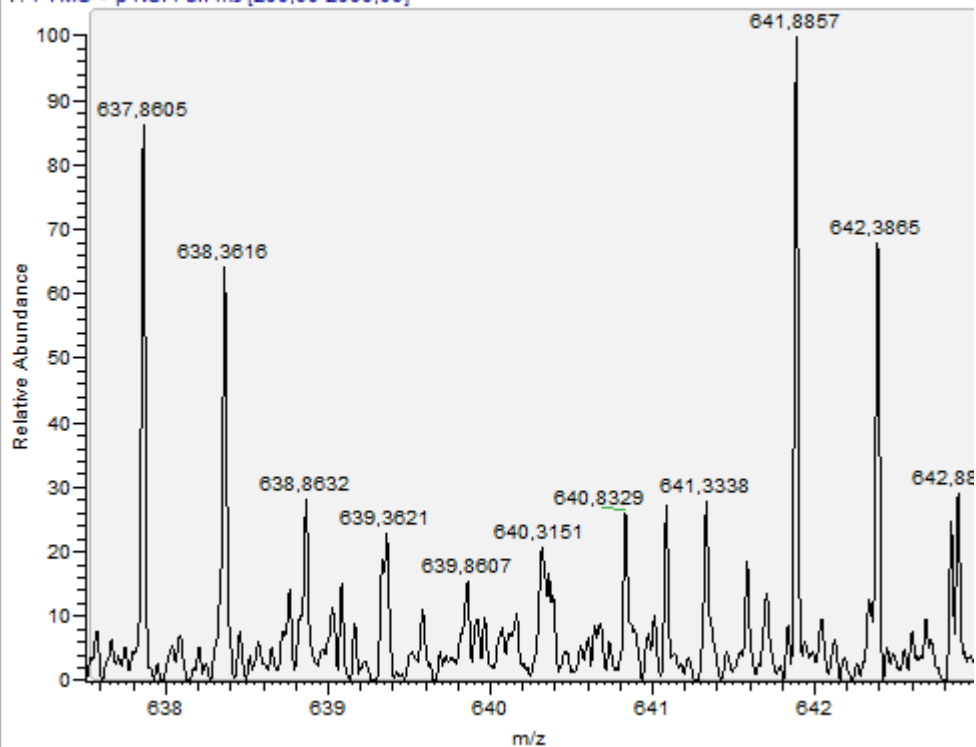

hipocampo\_02 #3656-3992 RT: 26,39-28,04 AV: 16 NL: 2,86E4  
T: FTMS + p NSI Full ms [200,00-2000,00]

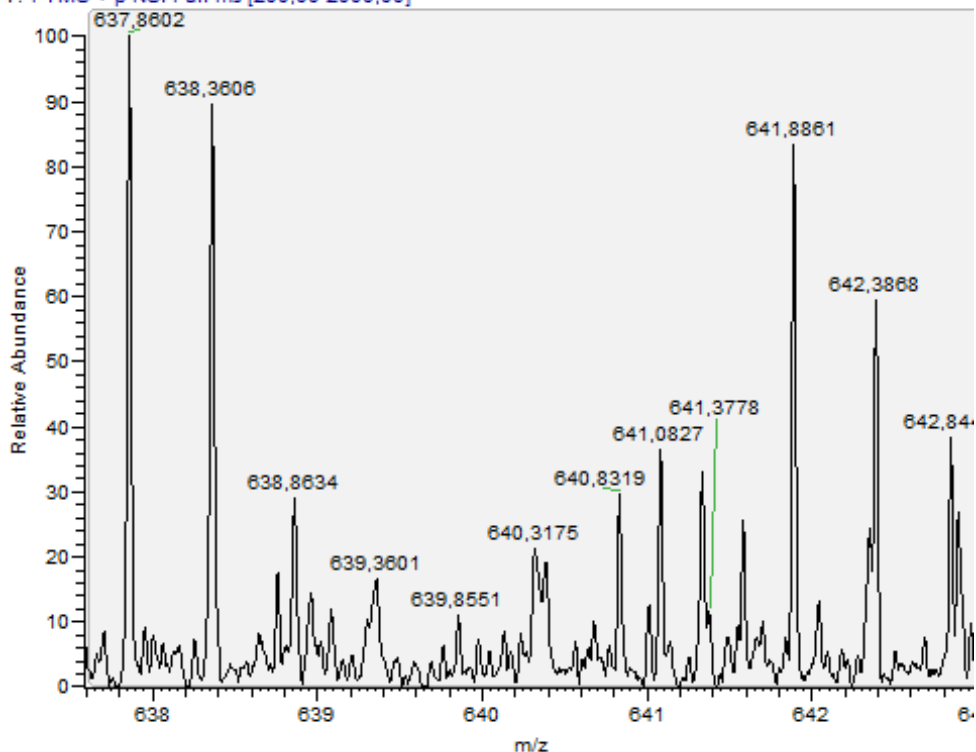

# AQATGKPAQYIAVHVVPDQL 2+

hipocampo\_01 #8037-8227 RT: 50,75-51,78 AV: 14 NL: 3,64E4  
T: FTMS + p NSI Full ms [200,00-2000,00]

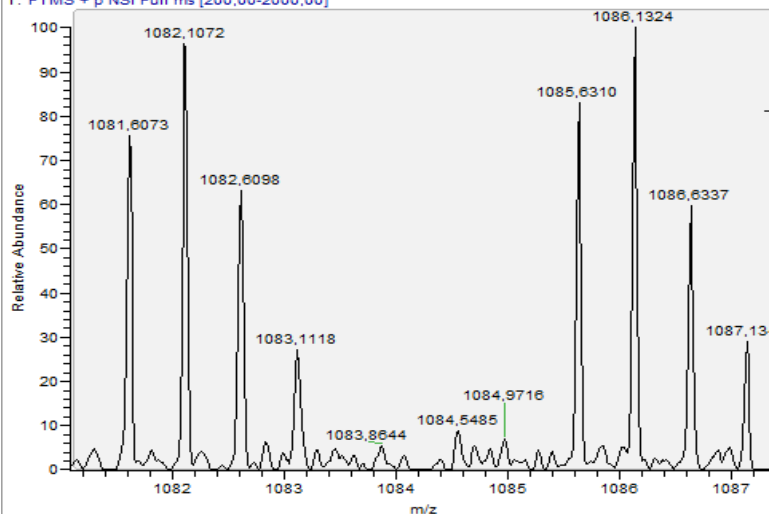

hipocampo\_02 #7660-7912 RT: 49,26-50,69 AV: 26 NL: 3,10E4  
T: FTMS + p NSI Full ms [200,00-2000,00]

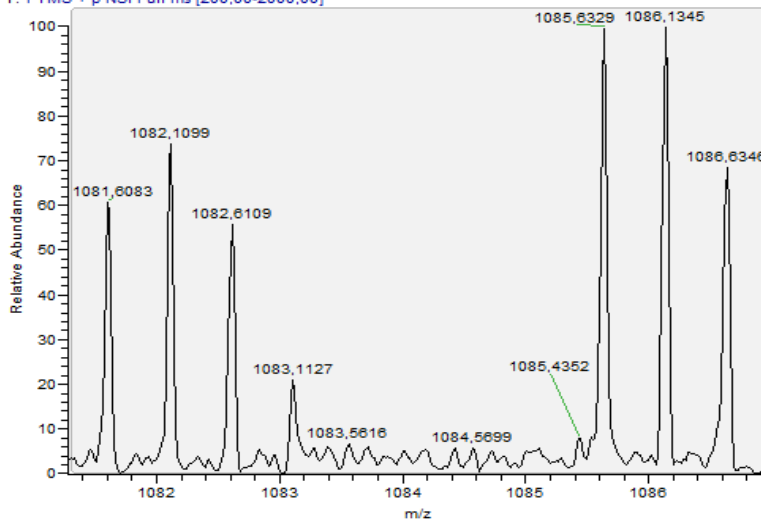

hipocampo\_04 #11031-11309 RT: 56,68-57,77 AV: 47 NL: 4,25E3  
T: FTMS + p NSI Full ms [200,00-2000,00]

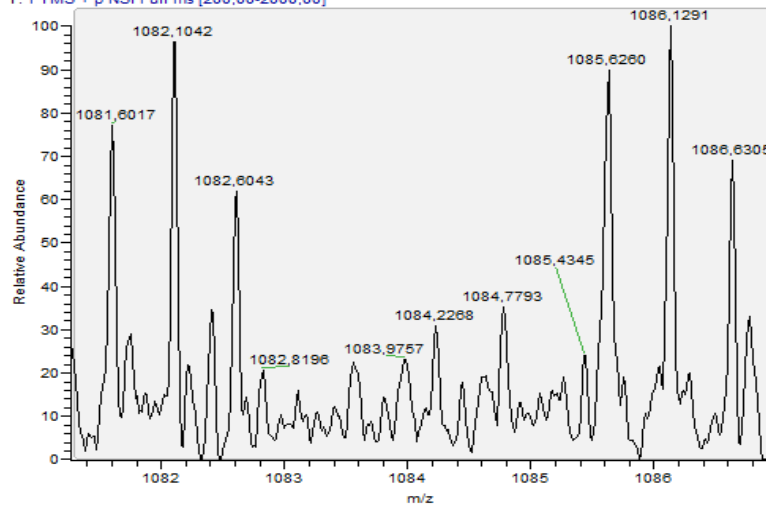

# AQATGKPAQYIAVHVVPDQL 3+

hipocampo\_01 #8037-8227 RT: 50,75-51,78 AV: 14 NL: 3,86E5  
T: FTMS + p NSI Full ms [200,00-2000,00]

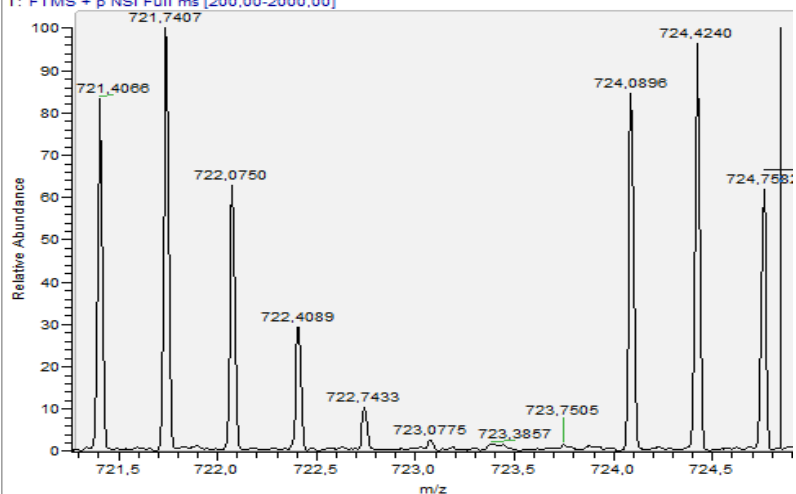

hipocampo\_02 #7660-7912 RT: 49,26-50,69 AV: 26 NL: 2,90E5  
T: FTMS + p NSI Full ms [200,00-2000,00]

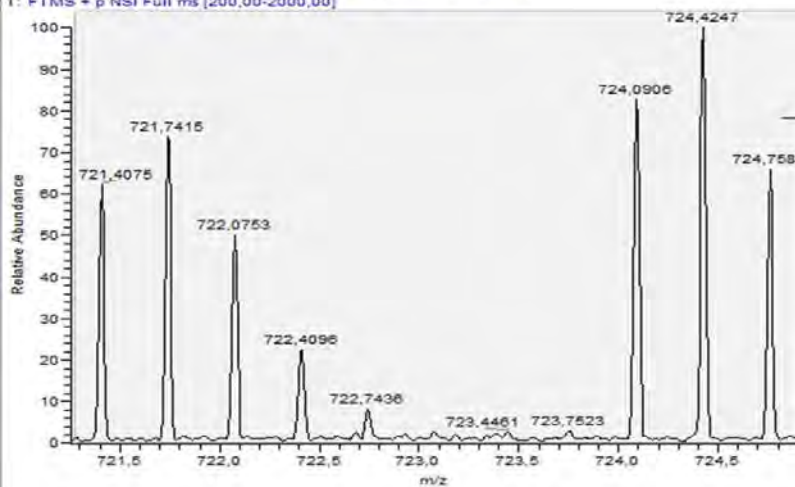

hipocampo\_04 #11124-11407 RT: 57,04-58,12 AV: 45 NL: 6,19E4  
T: FTMS + p NSI Full ms [200,00-2000,00]

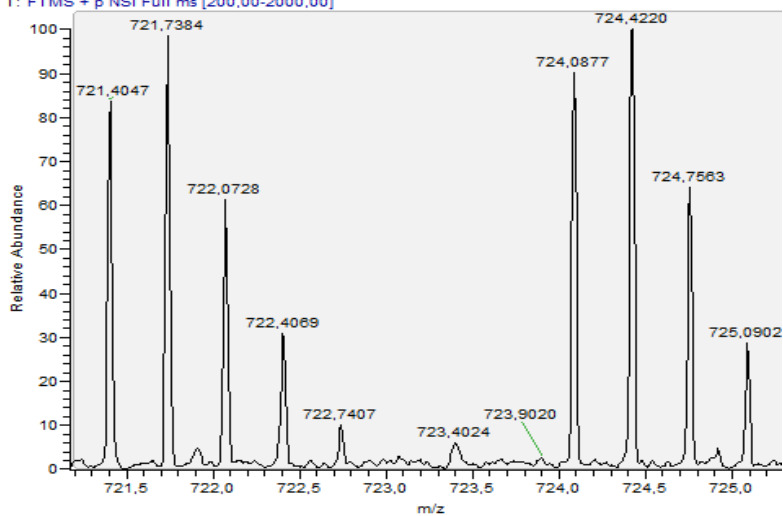



# ASKGLGSDLSSLASL 2+

hipocampo\_01 #9725-9785 RT: 60.74-61.10 AV: 7 NL: 6.99E4  
T: FTMS + p NSI Full ms [200.00-2000.00]

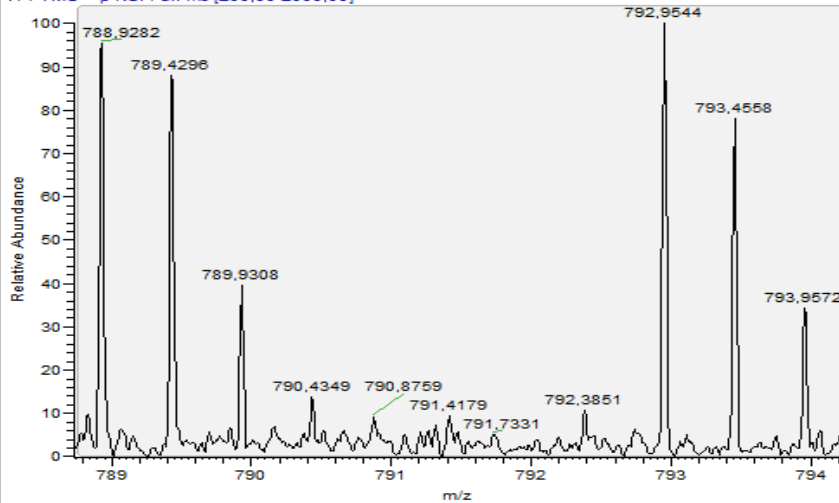

hipocampo\_02 #9145 RT: 58.08 AV: 1 NL: 5.28E5  
T: FTMS + p NSI Full ms [200.00-2000.00]

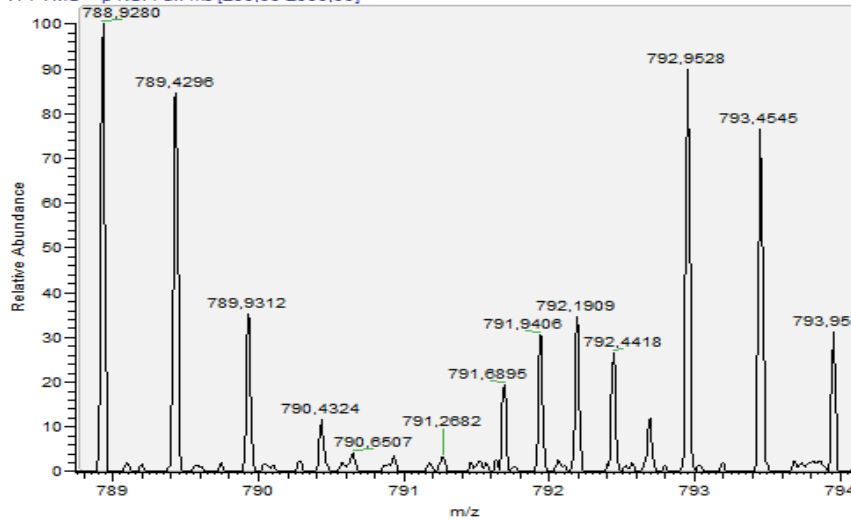

hipocampo\_04 #12826-13301 RT: 63.71-65.54 AV: 67 NL: 1.87E4  
T: FTMS + p NSI Full ms [200.00-2000.00]

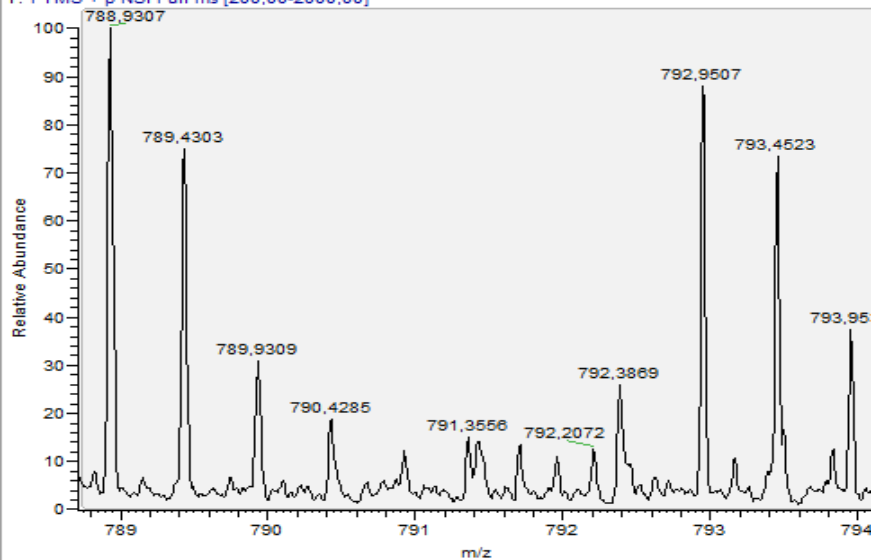

# SPSPTPATQSPKKPPAKDPLADLNKDFL 2+

hipocampo\_01 #10577-10883 RT: 65.94-67.73 AV: 16 NL: 5.28E4  
T: FTMS + p NSI Full ms [200.00-2000.00]

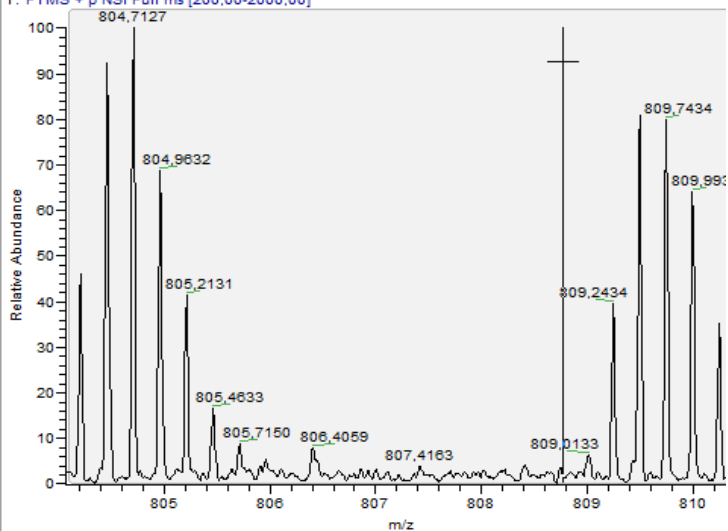

hipocampo\_02 #9831-10260 RT: 62.30-64.77 AV: 28 NL: 2.70E5  
T: FTMS + p NSI Full ms [200.00-2000.00]

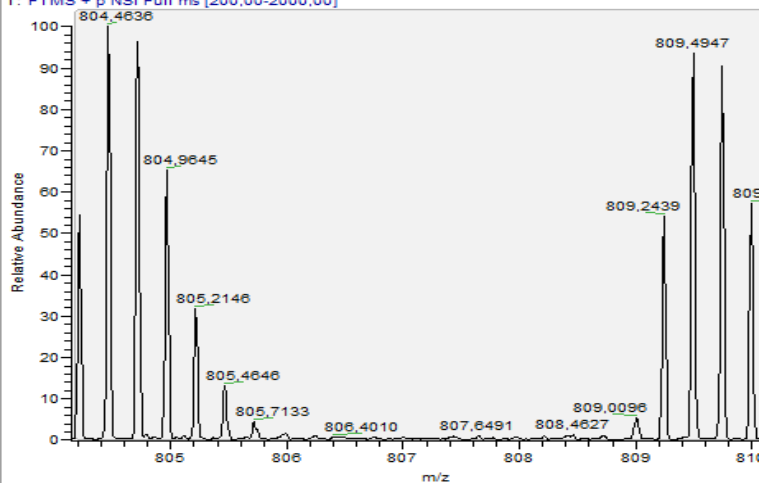

hipocampo\_04 #13872-14433 RT: 67.78-69.93 AV: 77 NL: 8.08E4  
T: FTMS + p NSI Full ms [200.00-2000.00]

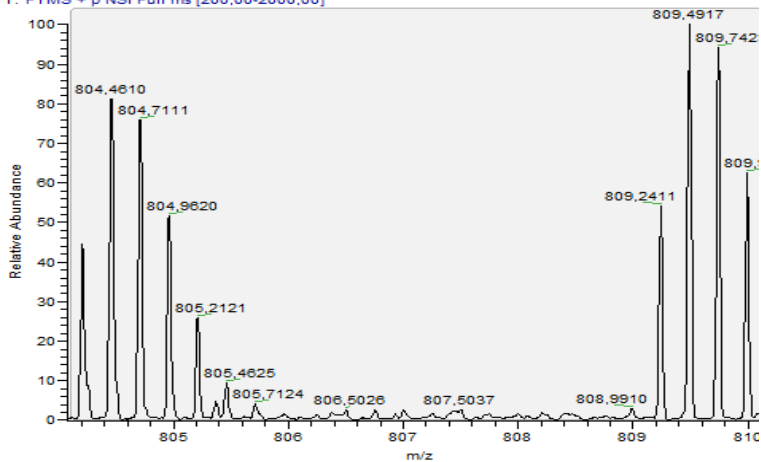

# TQVVSDAAYKGVQPHVV 2+

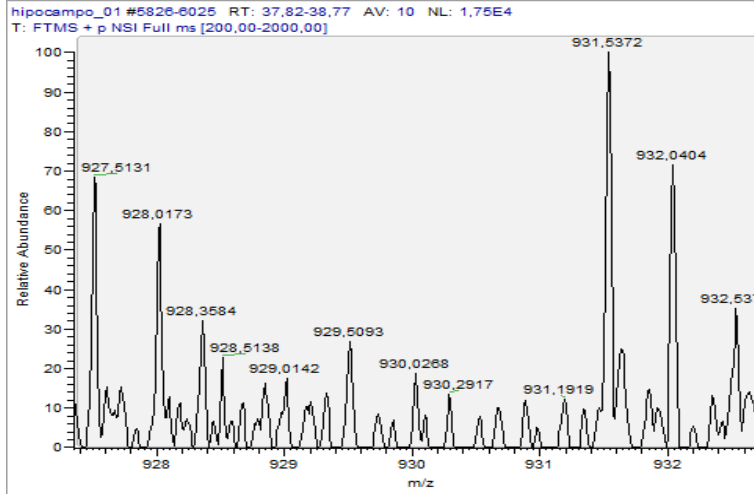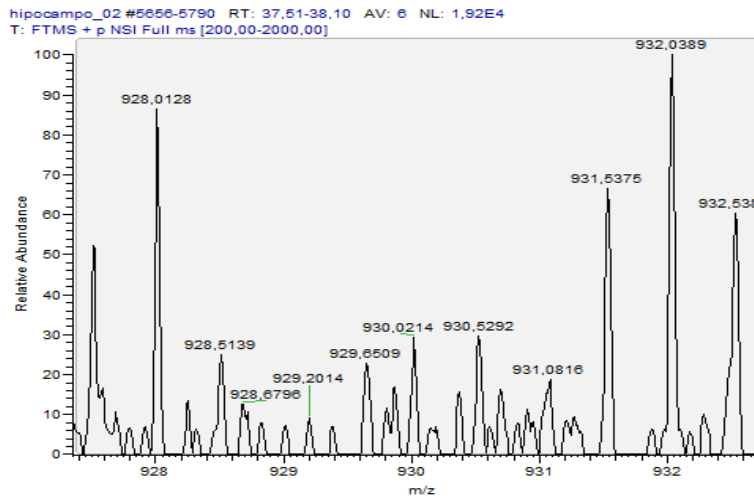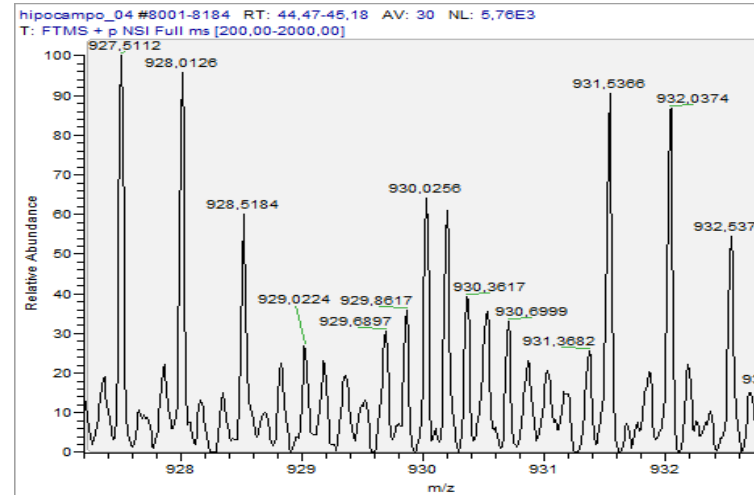

# ADEVSASLAKQGL 2+

hipocampo\_01 #6351-6603 RT: 40.76-42.19 AV: 15 NL: 9,50E4  
T: FTMS + p NSI Full ms [200,00-2000,00]

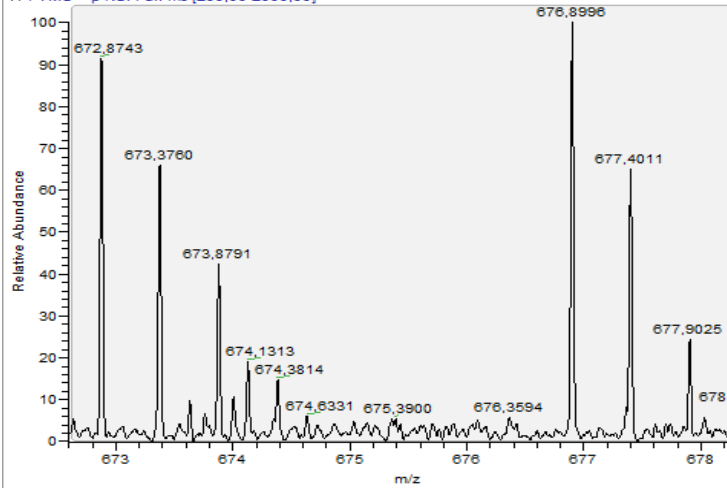

hipocampo\_02 #6175-6427 RT: 40.47-41.77 AV: 15 NL: 1,02E5  
T: FTMS + p NSI Full ms [200,00-2000,00]

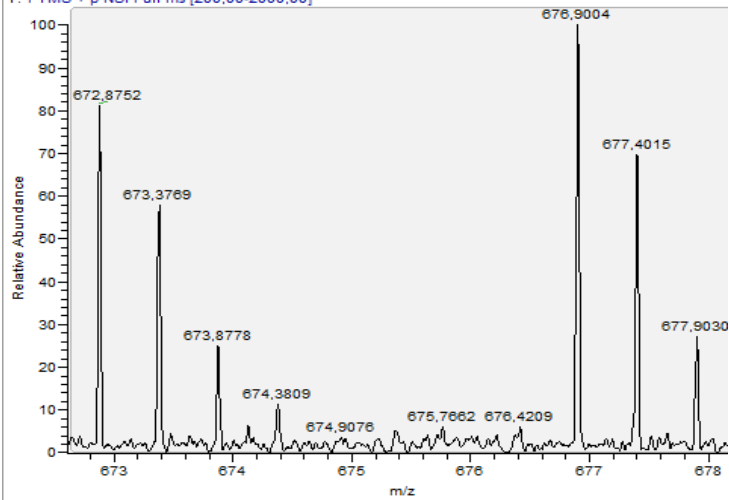

hipocampo\_04 #8651-9119 RT: 47.05-48.89 AV: 64 NL: 1,90E4  
T: FTMS + p NSI Full ms [200,00-2000,00]

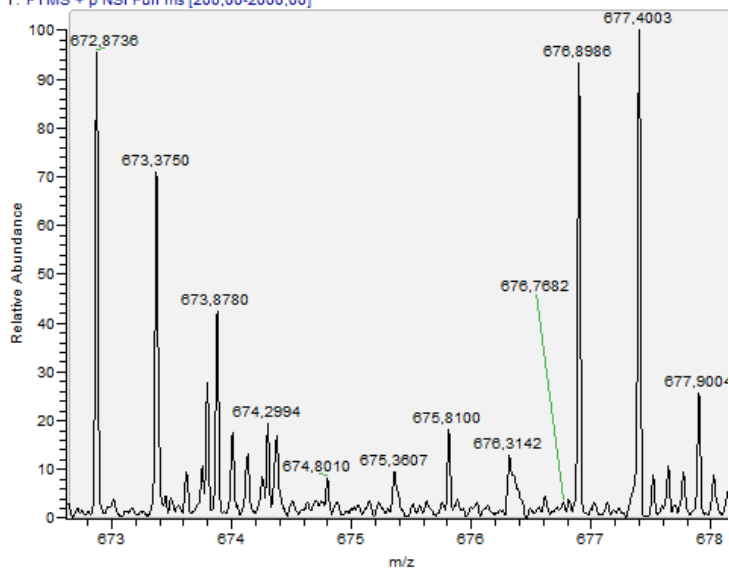

# ANSNPAMAPRE 2 (METHIONINE OXIDATION)

hipocampo\_01 #2265 RT: 18,17 AV: 1 NL: 2,64E4  
T: FTMS + p NSI Full ms [200,00-2000,00]

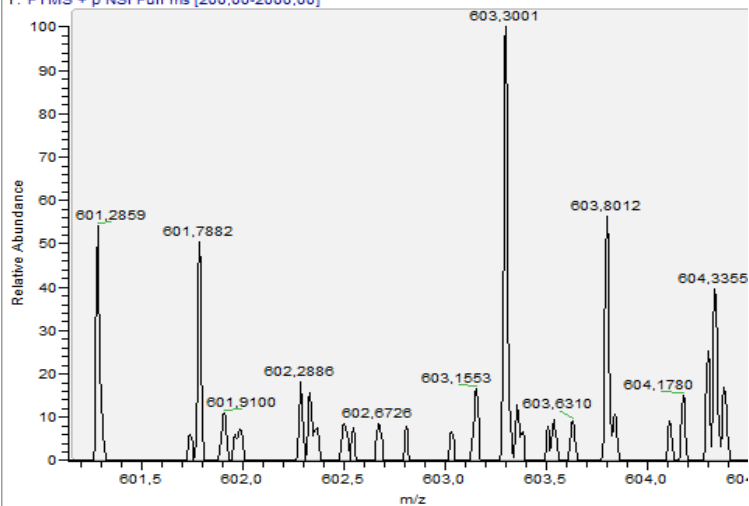

hipocampo\_02 #2133 RT: 17,42 AV: 1 NL: 7,51E3  
T: FTMS + p NSI Full ms [200,00-2000,00]

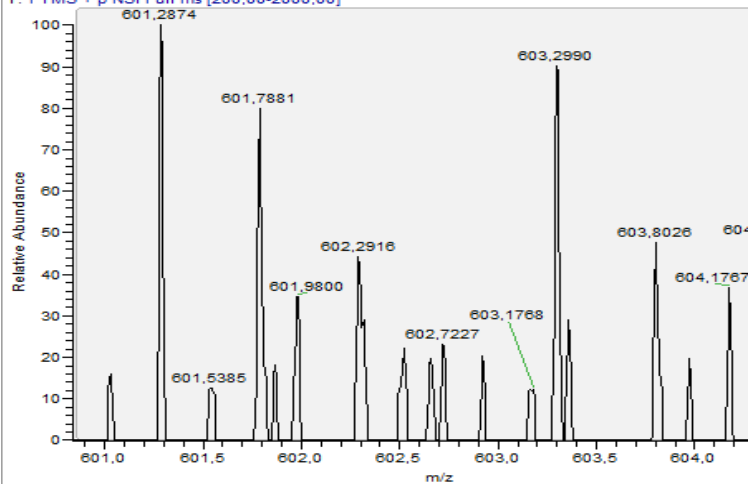

hipocampo\_04 #2501-2751 RT: 21,87-22,96 AV: 60 NL: 5,16E3  
T: FTMS + p NSI Full ms [200,00-2000,00]

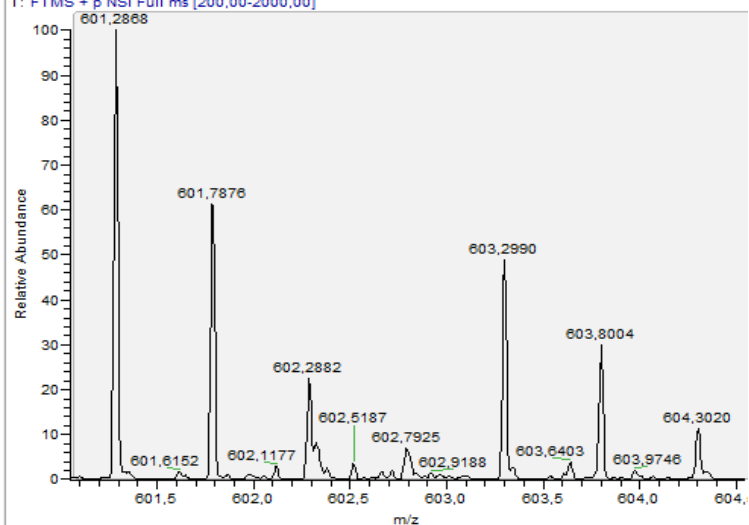

# SANSNPAMAPRE 2+

hipocampo\_01 #2763-2896 RT: 21,14-21,84 AV: 7 NL: 3,45E5  
T: FTMS + p NSI Full ms [200,00-2000,00]

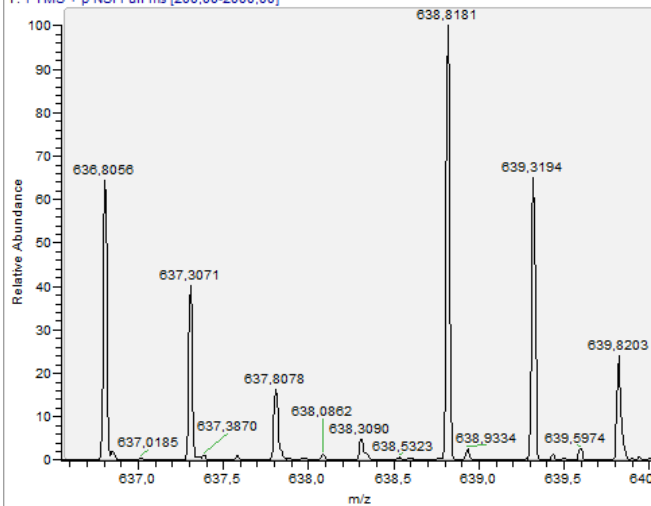

hipocampo\_02 #2675-2807 RT: 20,82-21,41 AV: 6 NL: 6,45E5  
T: FTMS + p NSI Full ms [200,00-2000,00]

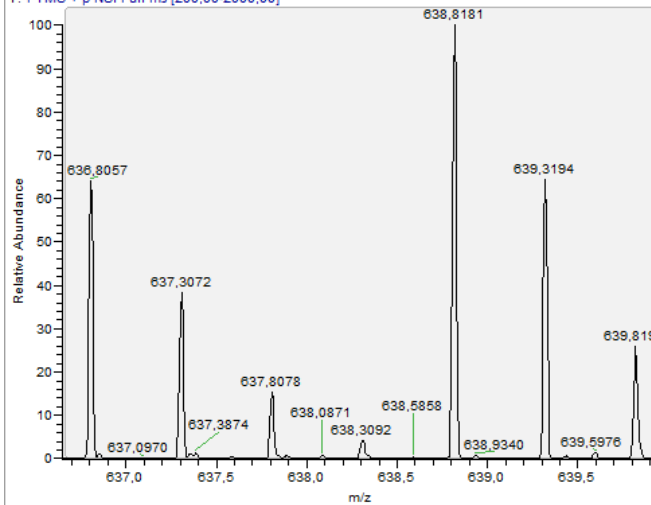

hipocampo\_04 #3088-3856 RT: 24,45-27,39 AV: 106 NL: 2,21E4  
T: FTMS + p NSI Full ms [200,00-2000,00]

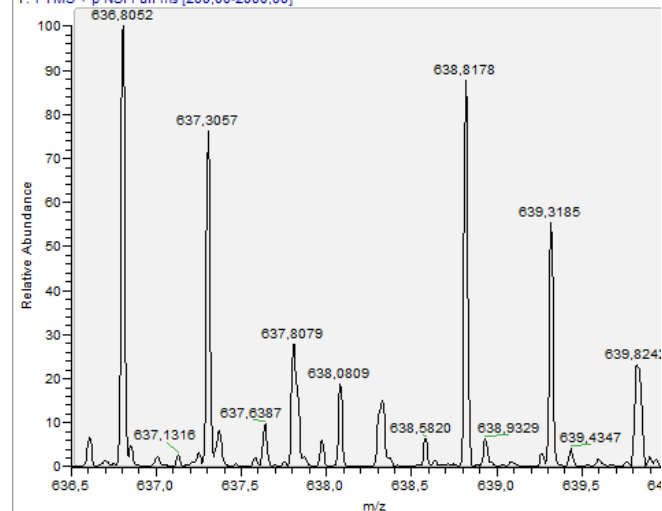

# GISTPEELGLDKV 2+

hipocampo\_01 #8235 RT: 51.90 AV: 1 NL: 3,34E5  
T: FTMS + p NSI Full ms [200,00-2000,00]

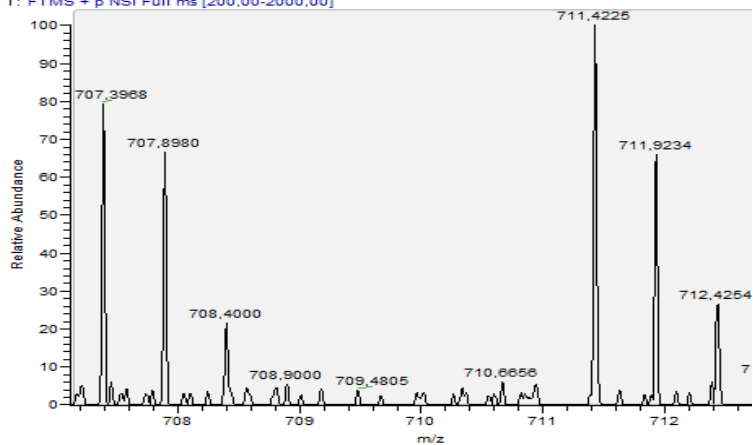

hipocampo\_02 #7849-8160 RT: 50.37-52.15 AV: 30 NL: 2,33E5  
T: FTMS + p NSI Full ms [200,00-2000,00]

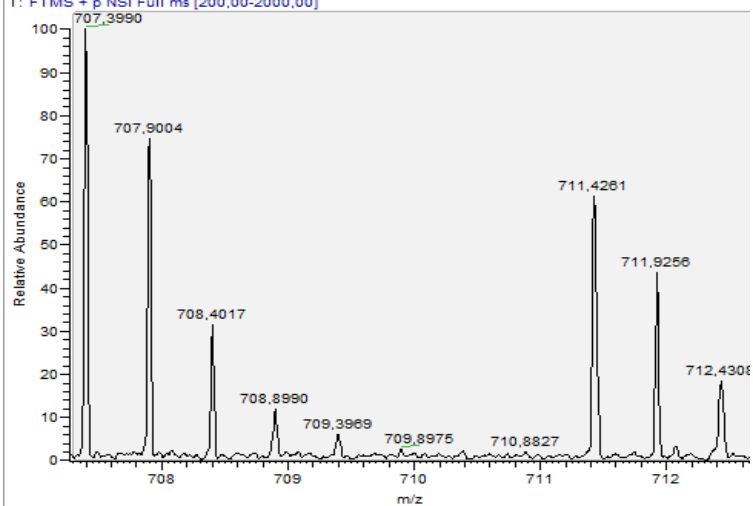

hipocampo\_04 #11217-11879 RT: 57.42-59.98 AV: 100 NL: 5,25E4  
T: FTMS + p NSI Full ms [200,00-2000,00]

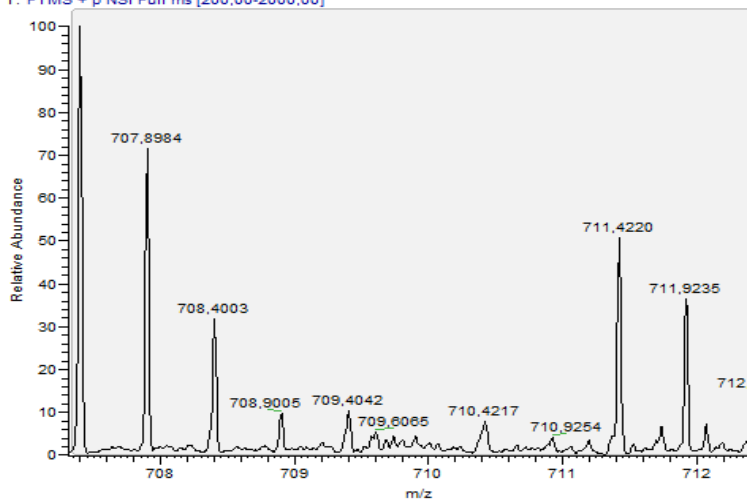

# NDFASAVRILEV 2+

hipocampo\_01 #11123-11243 RT: 69,36-69,93 AV: 6 NL: 6,30E4

T: FTMS + p NSI Full ms [200,00-2000,00]

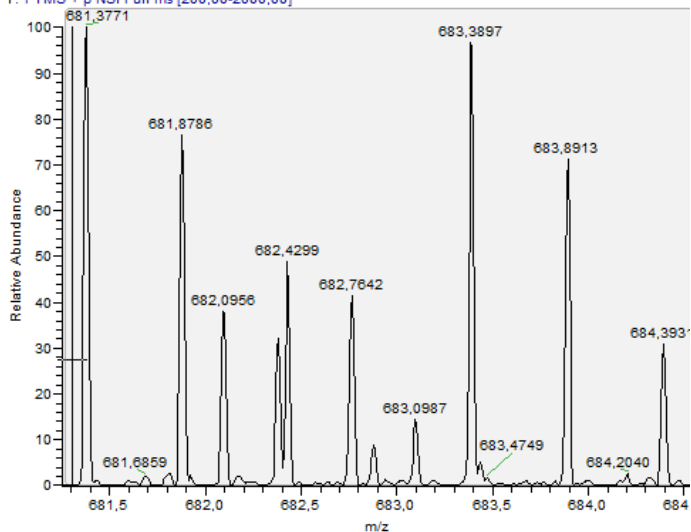

hipocampo\_02 #10808 RT: 68,17 AV: 1 NL: 1,40E5

T: FTMS + p NSI Full ms [200,00-2000,00]

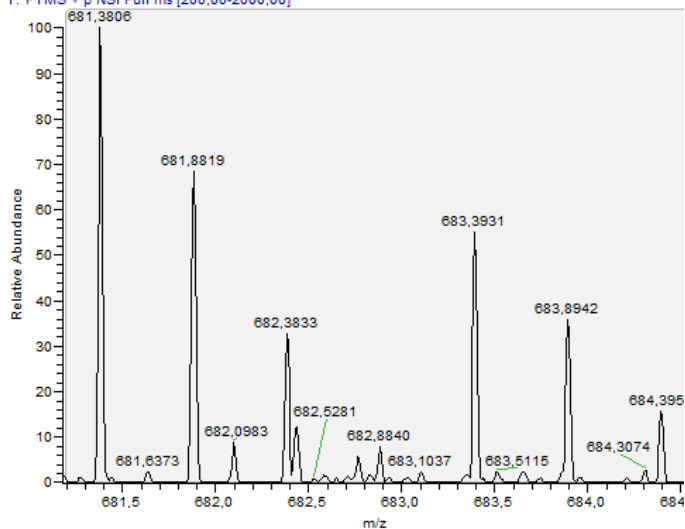

hipocampo\_04 #14919-15477 RT: 71,86-74,06 AV: 92 NL: 4,56E3

T: FTMS + p NSI Full ms [200,00-2000,00]

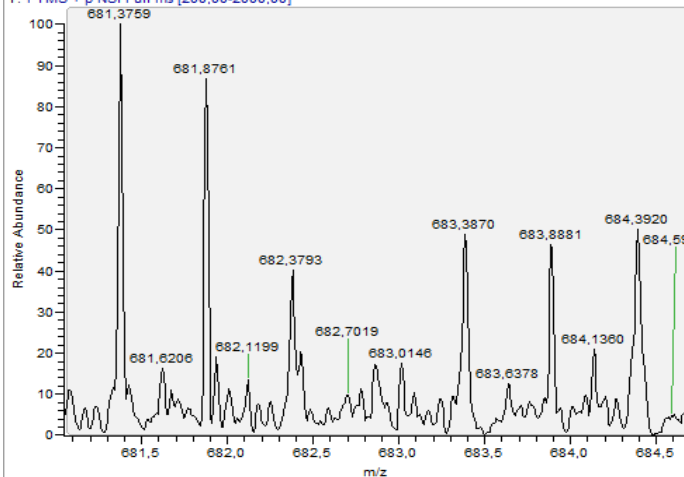



# RPTLNELGISTPEELGLDKV 3+

hipocampo\_01 #10330-10577 RT: 64,56-65,85 AV: 13 NL: 3,32E4  
T: FTMS + p NSI Full ms [200,00-2000,00]

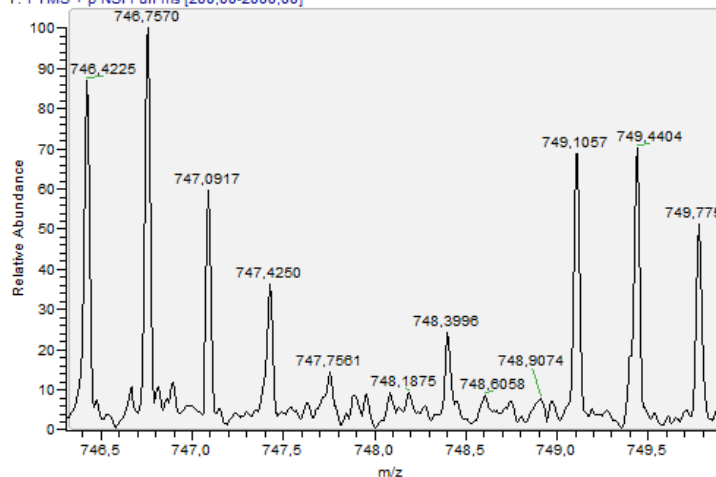

hipocampo\_02 #9831-10076 RT: 62,30-63,60 AV: 15 NL: 5,17E4  
T: FTMS + p NSI Full ms [200,00-2000,00]

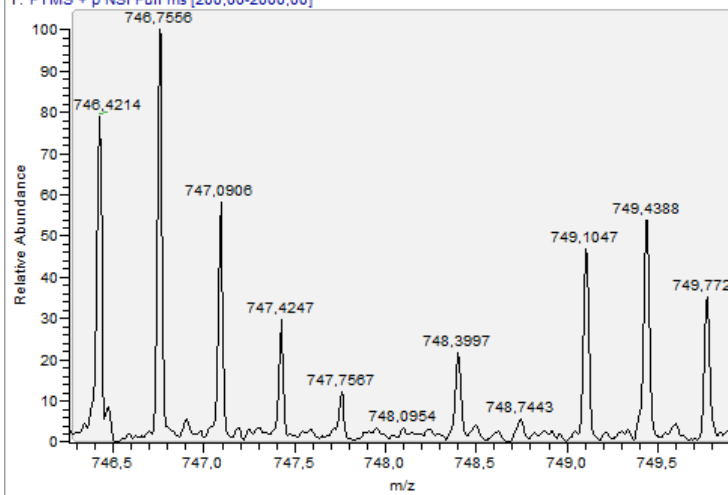

hipocampo\_04 #13395-13686 RT: 65,93-66,99 AV: 36 NL: 2,35E4  
T: FTMS + p NSI Full ms [200,00-2000,00]

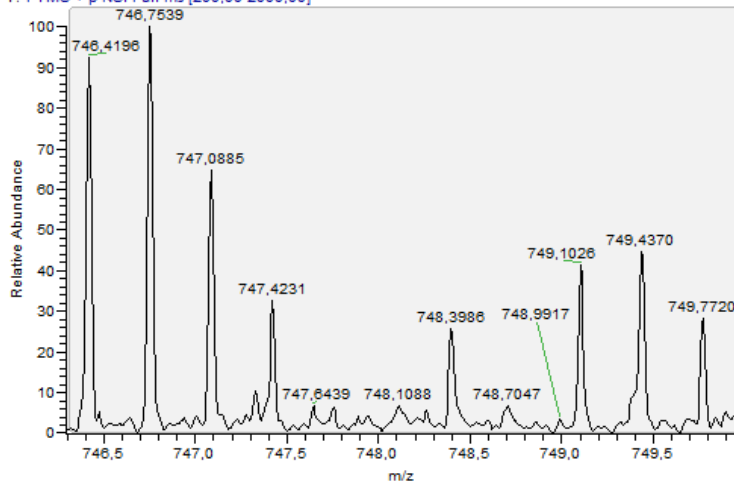

# SGQAAARPLVA 2+

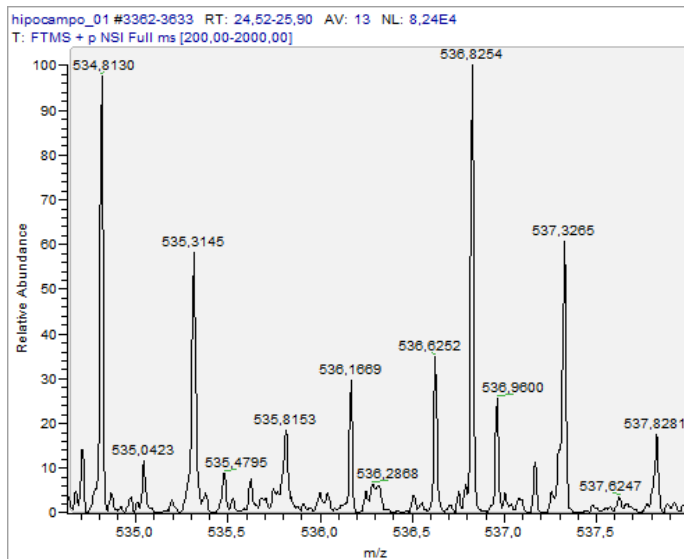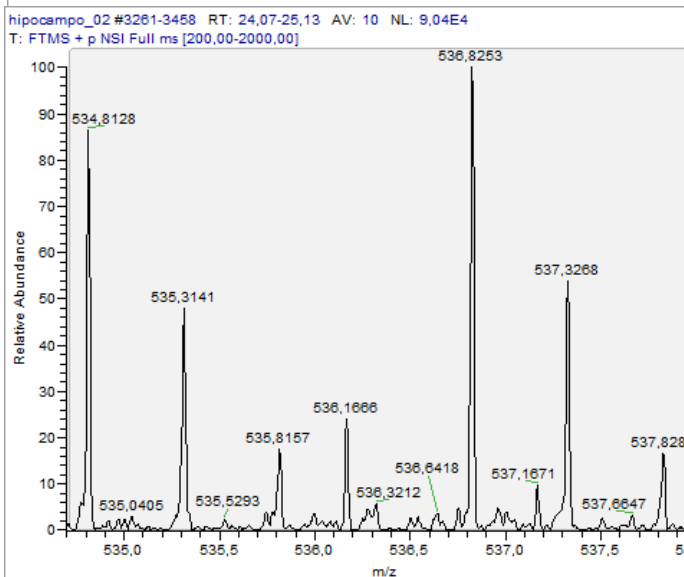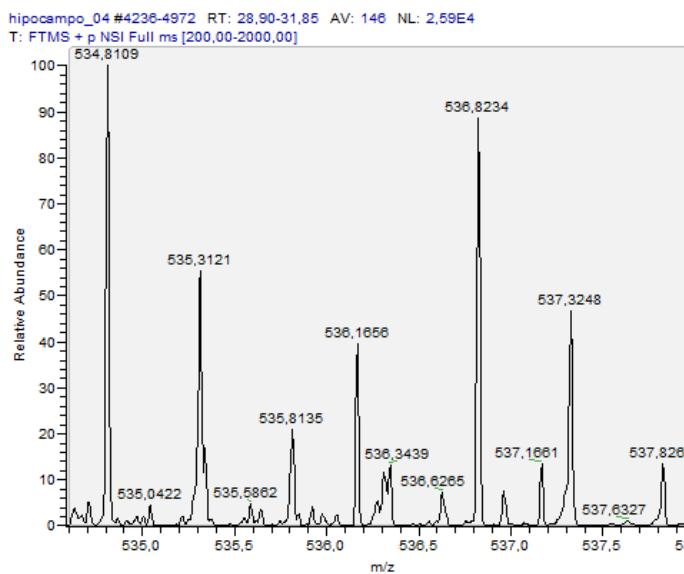

# SGQAAARPLVATV 2+

hipocampo\_01 #5075-5214 RT: 33,73-34,39 AV: 7 NL: 3,30E5

T: FTMS + p NSI Full ms [200,00-2000,00]

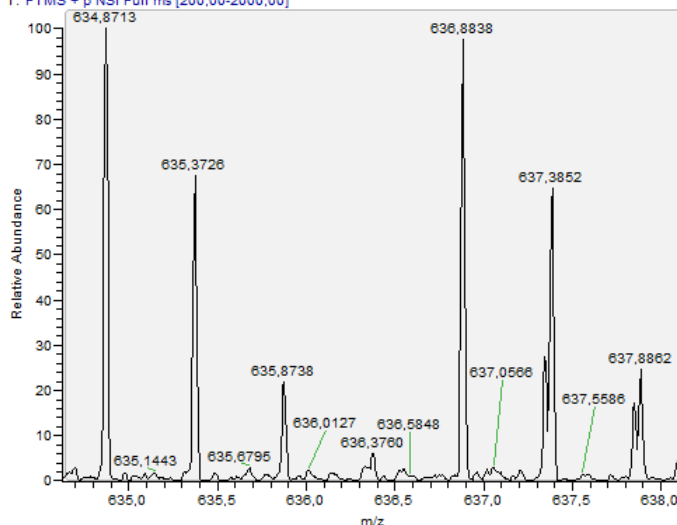

hipocampo\_02 #4859-5255 RT: 33,05-35,16 AV: 20 NL: 1,46E5

T: FTMS + p NSI Full ms [200,00-2000,00]

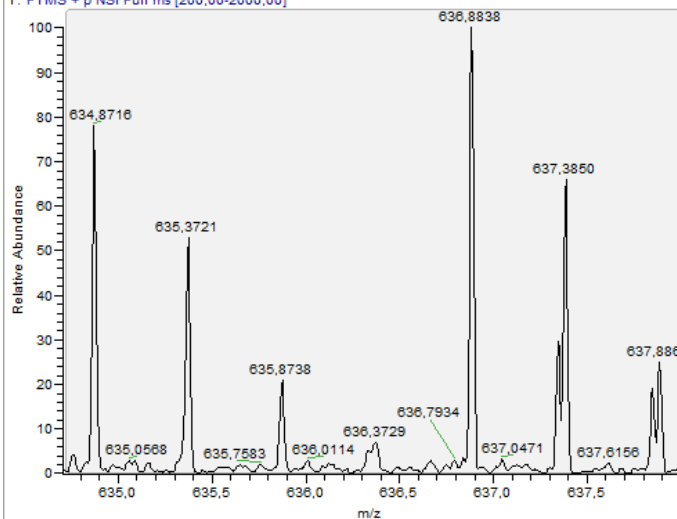

hipocampo\_04 #8837-7096 RT: 39,63-40,73 AV: 63 NL: 7,14E4

T: FTMS + p NSI Full ms [200,00-2000,00]

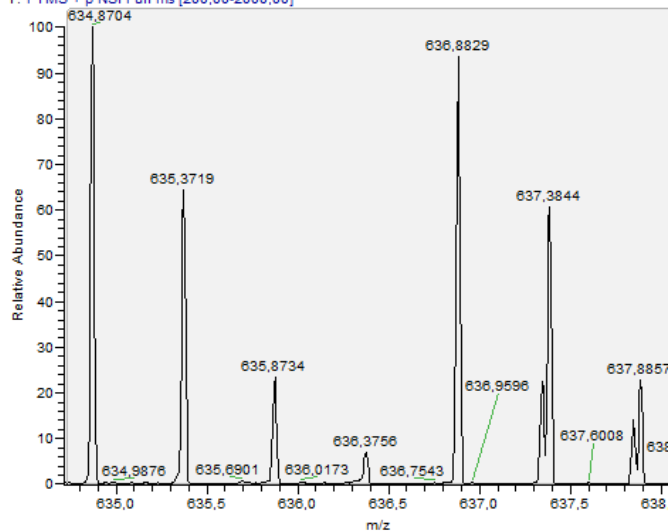

# TVGLNVPASVRF 2+

hipocampo\_01 #9173 RT: 57.42 AV: 1 NL: 1,57E5  
T: FTMS + p NSI Full ms [200,00-2000,00]

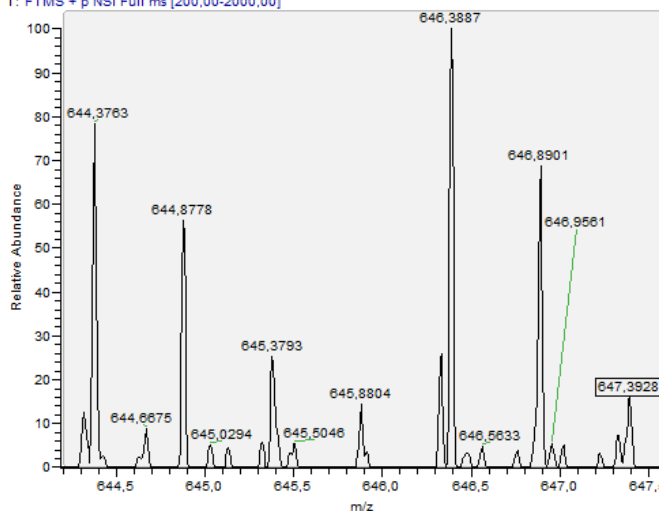

hipocampo\_02 #8587 RT: 54.77 AV: 1 NL: 3,14E5  
T: FTMS + p NSI Full ms [200,00-2000,00]

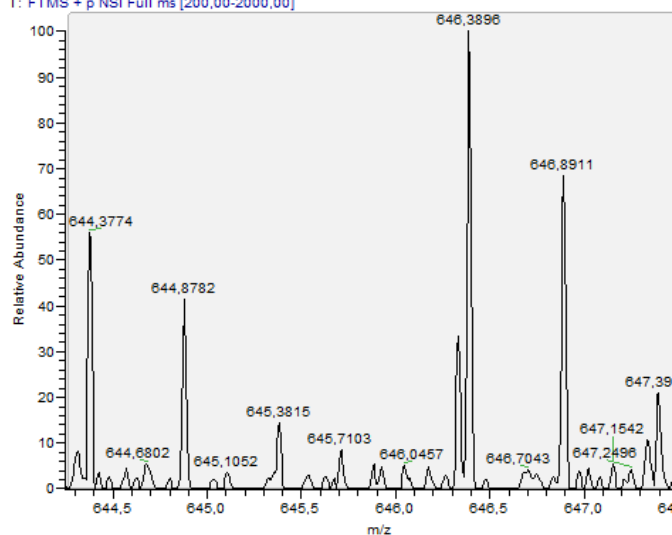

hipocampo\_04 #12070-12730 RT: 60.76-63.30 AV: 99 NL: 2,10E4  
T: FTMS + p NSI Full ms [200,00-2000,00]

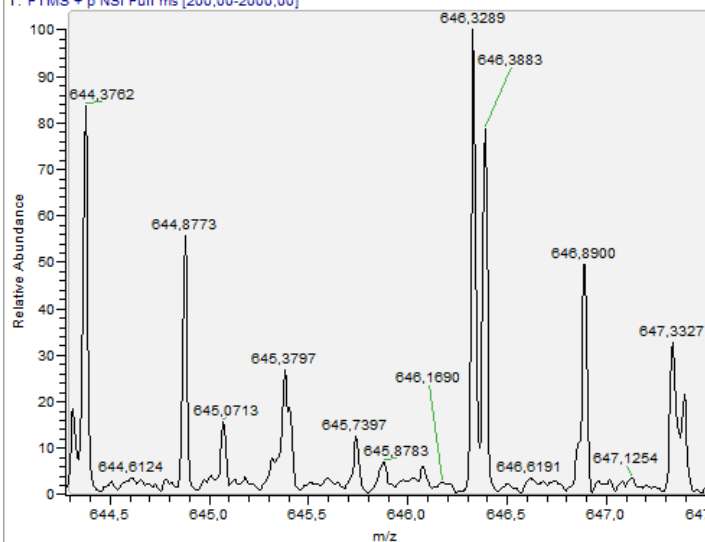

# SFARAPQLDL 2+

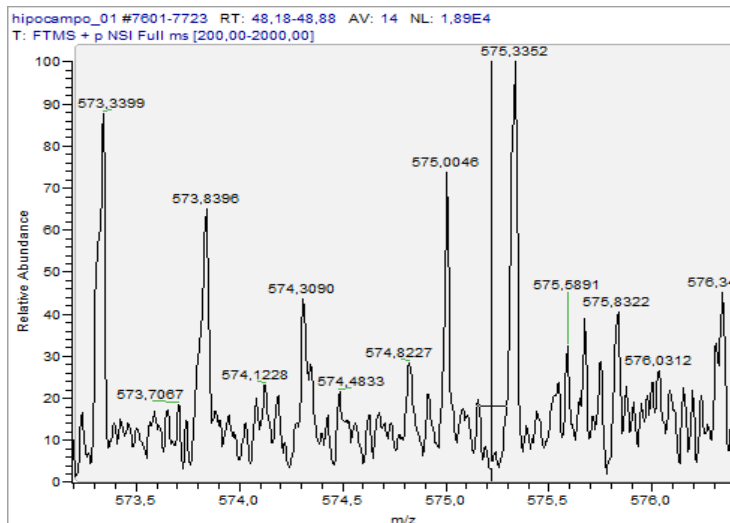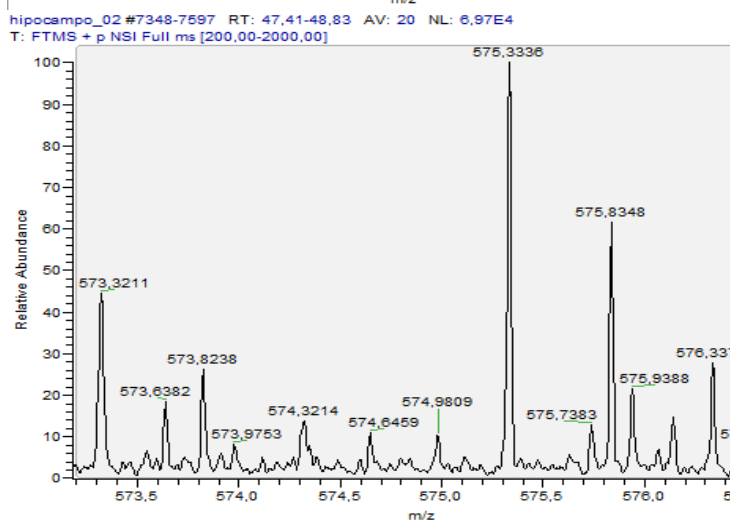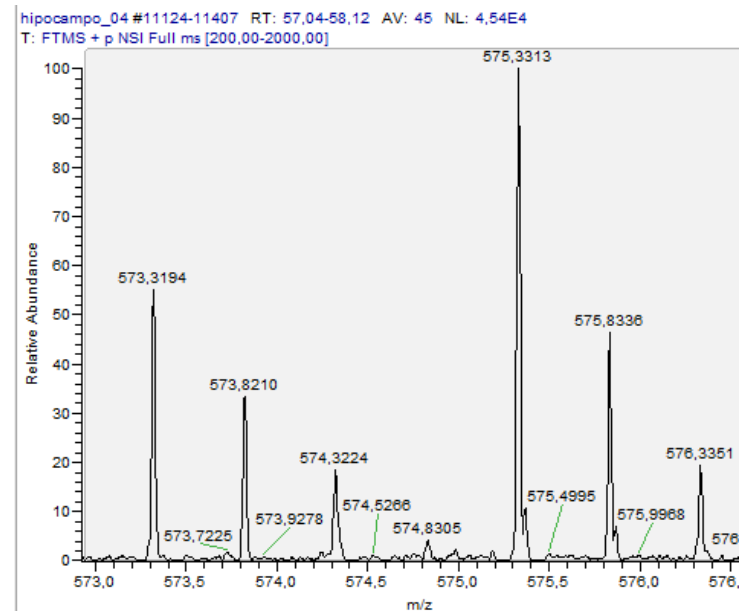

# AGNSDLILPVPAFNVINGGSHAGNKL 3+

hipocampo\_01 #11518 RT: 71.73 AV: 1 NL: 8,61E4  
T: FTMS + p NSI Full ms [200,00-2000,00]

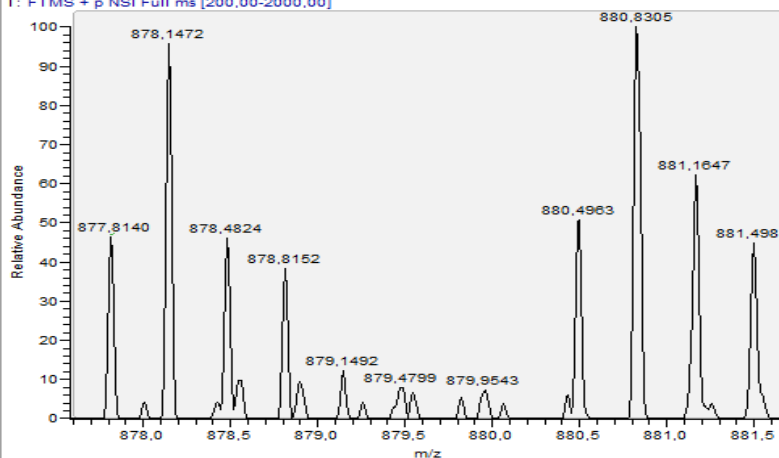

hipocampo\_02 #10983-11162 RT: 69.31-70.37 AV: 10 NL: 6,10E4  
T: FTMS + p NSI Full ms [200,00-2000,00]

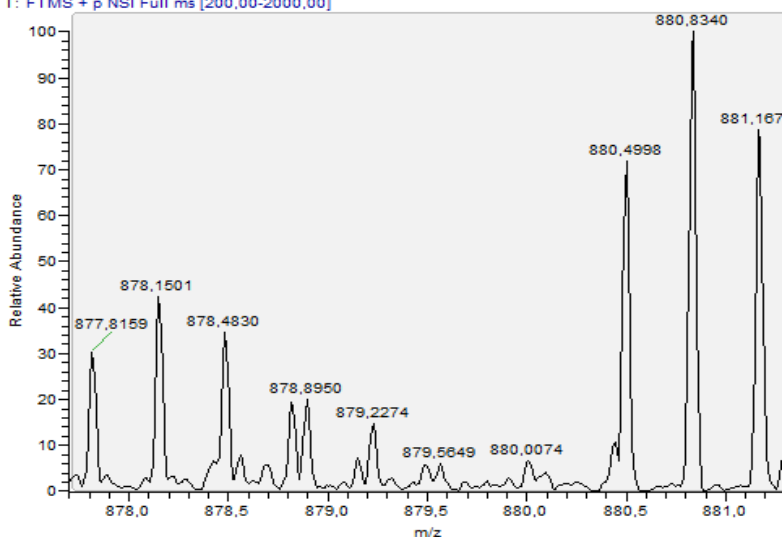

hipocampo\_04 #15174 RT: 72.84 AV: 1 NL: 1,26E4  
T: FTMS + p NSI Full ms [200,00-2000,00]

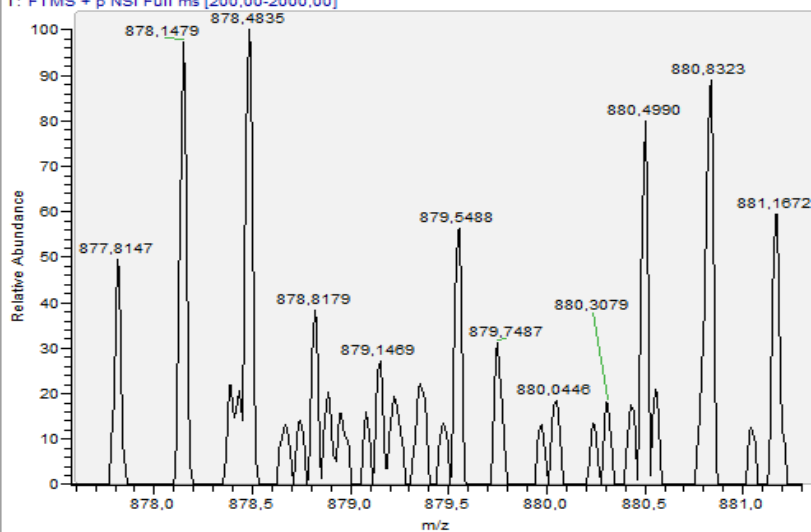

# SKVAFS AVRSTN 2+

hipocampo\_01 #3459 RT: 24.97 AV: 1 NL: 9,64E4  
T: FTMS + p NSI Full ms [200,00-2000,00]

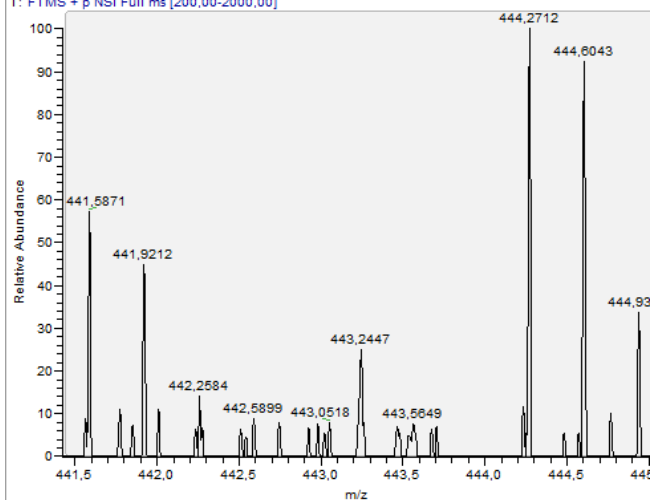

hipocampo\_02 #3261-3458 RT: 24,07-25,13 AV: 10 NL: 7,35E4  
T: FTMS + p NSI Full ms [200,00-2000,00]

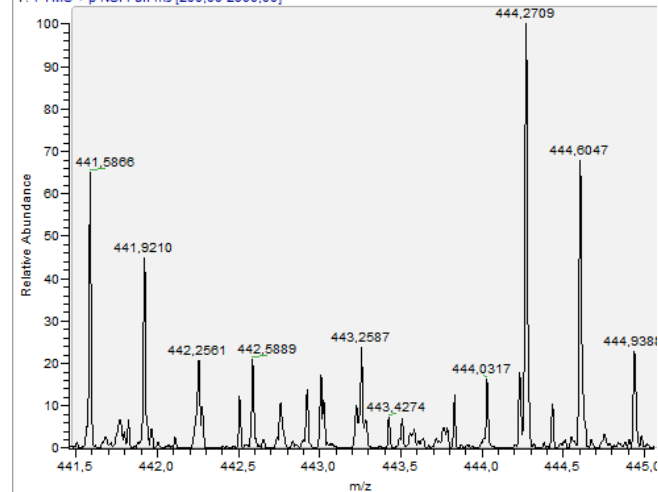

hipocampo\_04 #4425-4691 RT: 29,63-30,73 AV: 62 NL: 2,66E4  
T: FTMS + p NSI Full ms [200,00-2000,00]

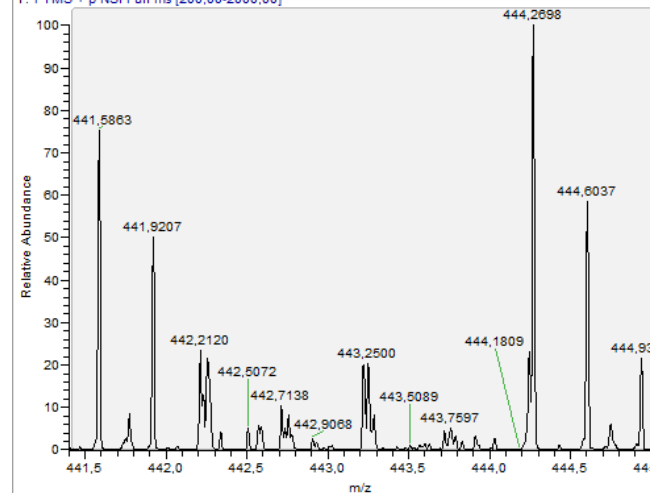

# AEDVTAALAKQGL 2+

hipocampo\_01 #7589 RT: 48,07 AV: 1 NL: 4,94E4

T: FTMS + p NSI Full ms [200,00-2000,00]

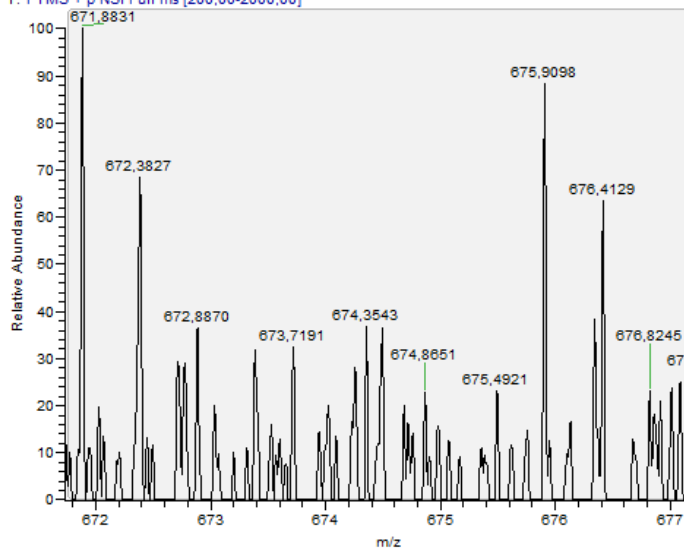

hipocampo\_02 #7286-7536 RT: 47,05-48,50 AV: 23 NL: 2,31E4

T: FTMS + p NSI Full ms [200,00-2000,00]

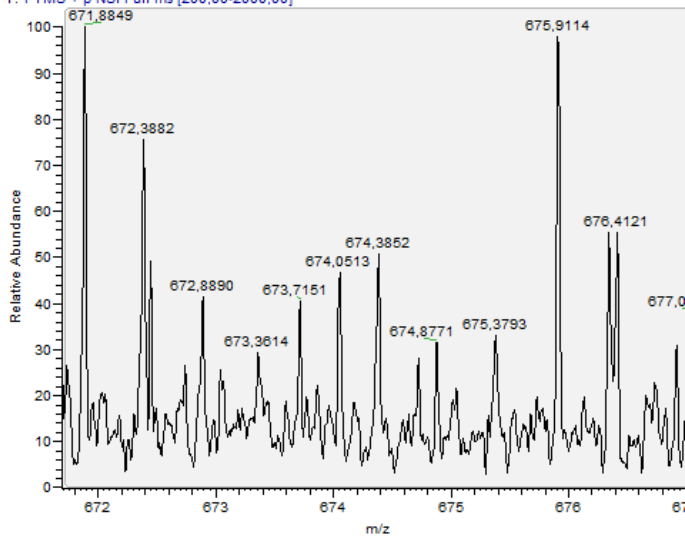

hipocampo\_04 #10478-10757 RT: 54,44-55,55 AV: 46 NL: 1,18E4

T: FTMS + p NSI Full ms [200,00-2000,00]

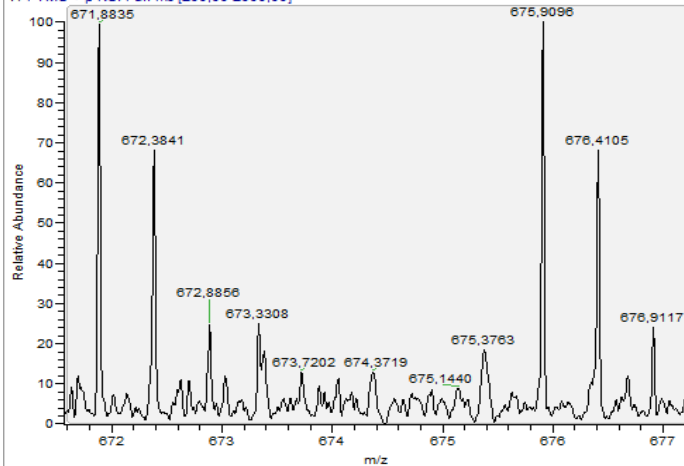



# VFDVELLKLE 2+

hipocampo\_01 #11301-11596 RT: 70,42-72,22 AV: 17 NL: 2,57E4  
T: FTMS + p NSI Full ms [200,00-2000,00]

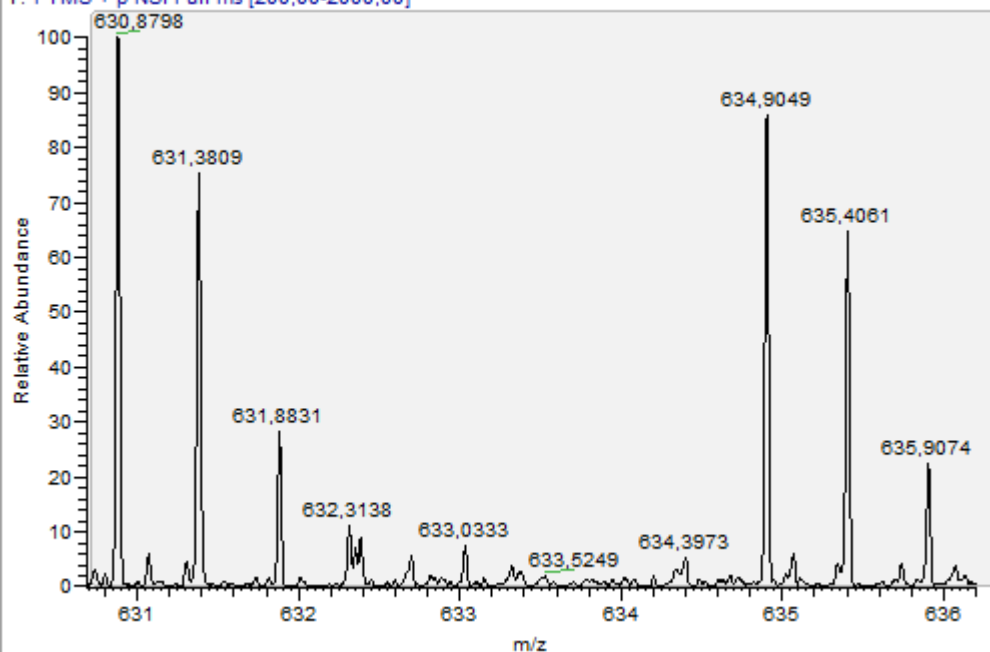

hipocampo\_02 #10904 RT: 68,76 AV: 1 NL: 9,97E4  
T: FTMS + p NSI Full ms [200,00-2000,00]

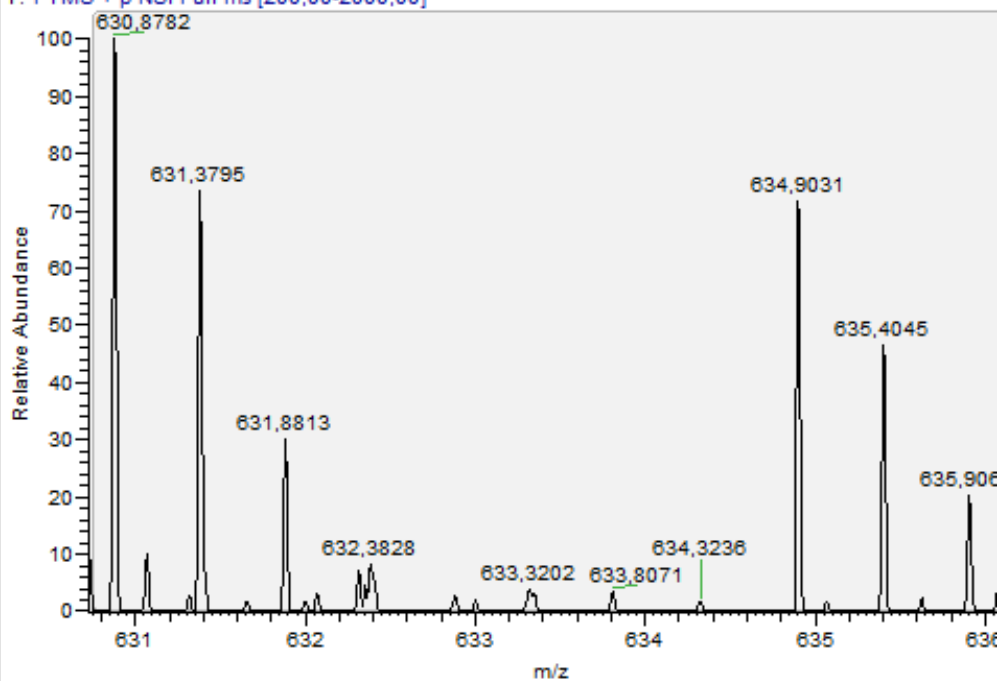

# AFRVPTPNVSVVDL 2+

hipocampo\_01 #10639-10822 RT: 66,32-67,37 AV: 10 NL: 2,18E4

T: FTMS + p NSI Full ms [200,00-2000,00]

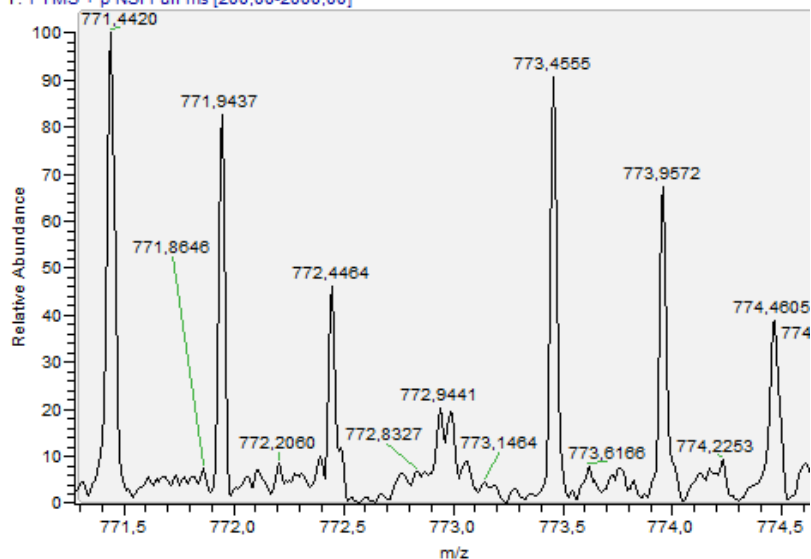

hipocampo\_02 #10463 RT: 66,06 AV: 1 NL: 4,89E4

T: FTMS + p NSI Full ms [200,00-2000,00]

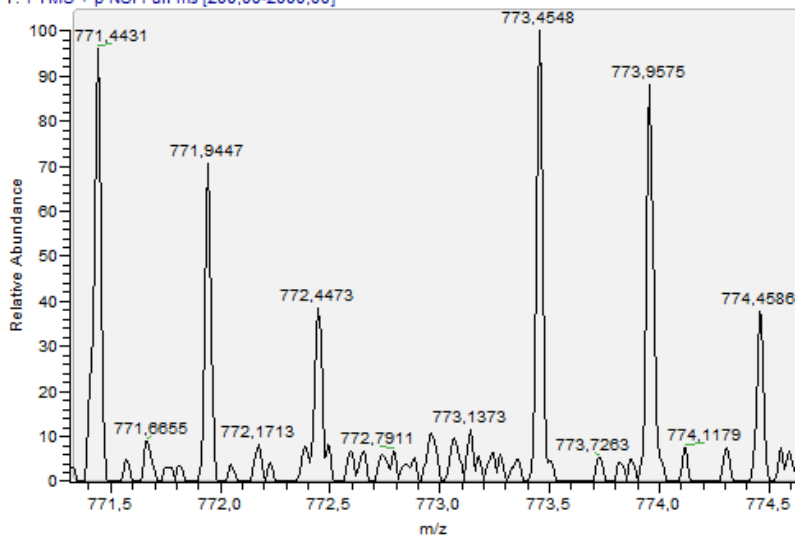

hipocampo\_04 #14155-14339 RT: 68,90-69,61 AV: 27 NL: 5,94E3

T: FTMS + p NSI Full ms [200,00-2000,00]

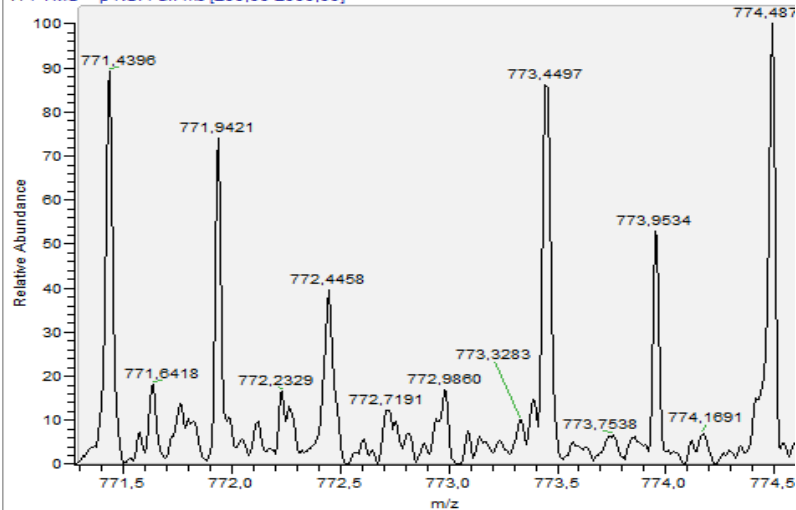

# KFDDPKFEVIDKPQS 2+

hipocampo\_01 #5826-6026 RT: 37.82-38.77 AV: 10 NL: 1,33E4

T: FTMS + p NSI Full ms [200.00-2000.00]

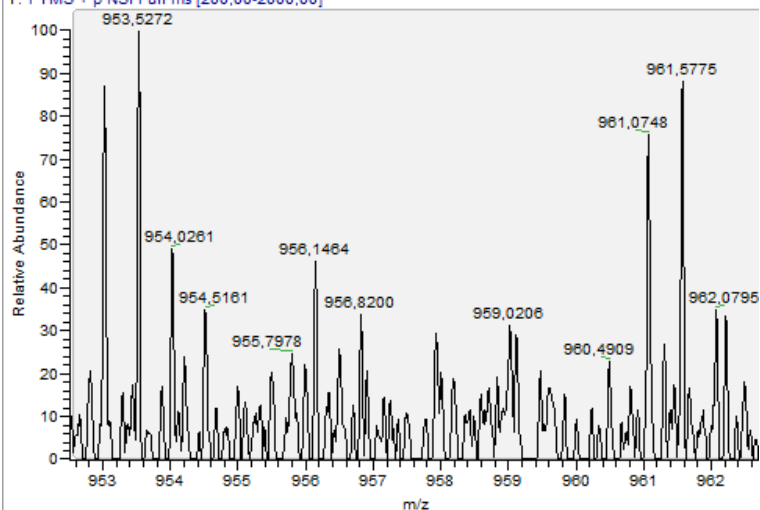

hipocampo\_02 #5856-5860 RT: 37.51-38.44 AV: 9 NL: 1,46E4

T: FTMS + p NSI Full ms [200.00-2000.00]

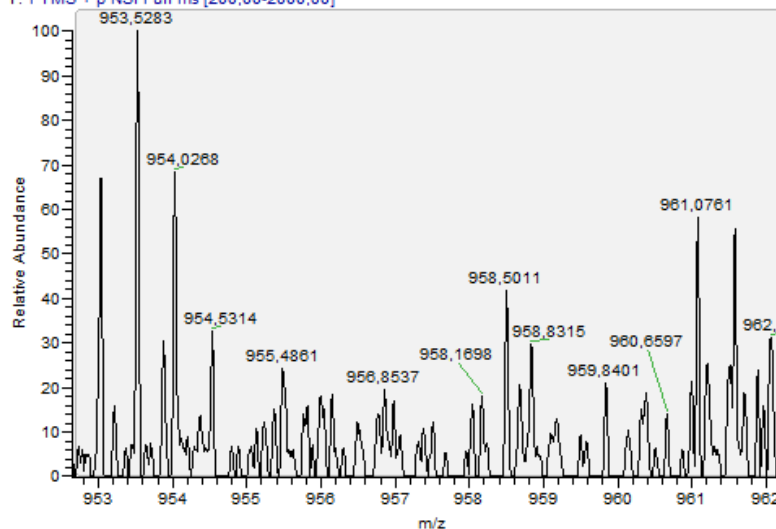

# QQGAGALVHSE 2+

hipocampo\_01 #3093-3297 RT: 22,99-24,01 AV: 10 NL: 9,49E4

T: FTMS + p NSI Full ms [200,00-2000,00]

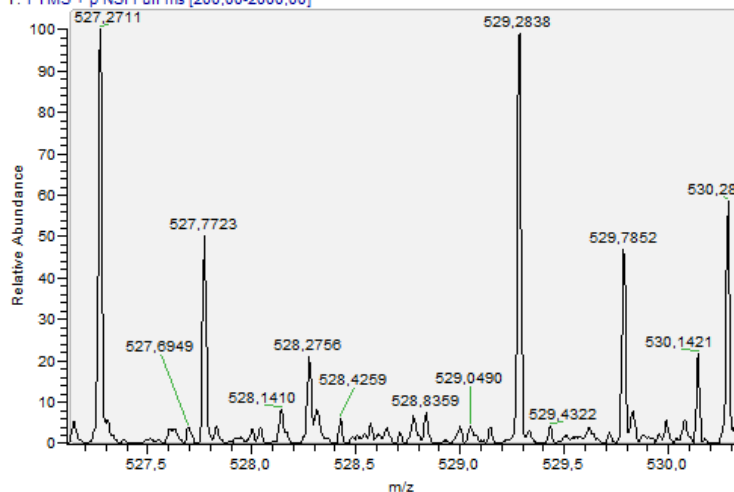

hipocampo\_02 #2740-3261 RT: 21,18-24,07 AV: 26 NL: 6,89E4

T: FTMS + p NSI Full ms [200,00-2000,00]

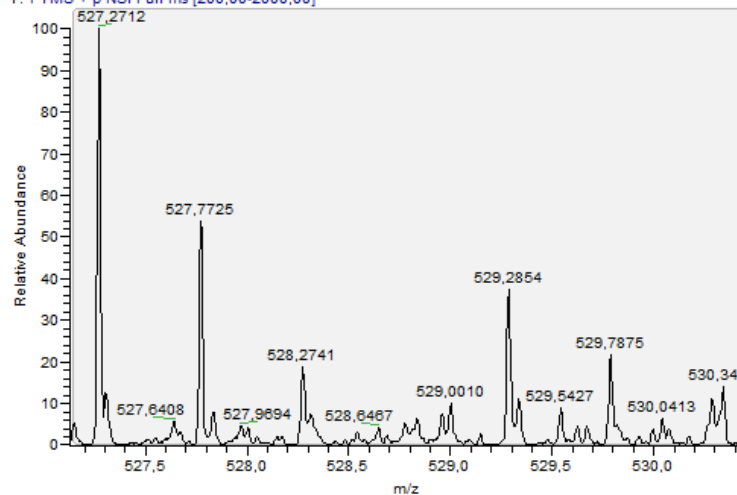

hipocampo\_04 #3950-4236 RT: 27,80-28,86 AV: 43 NL: 1,78E4

T: FTMS + p NSI Full ms [200,00-2000,00]

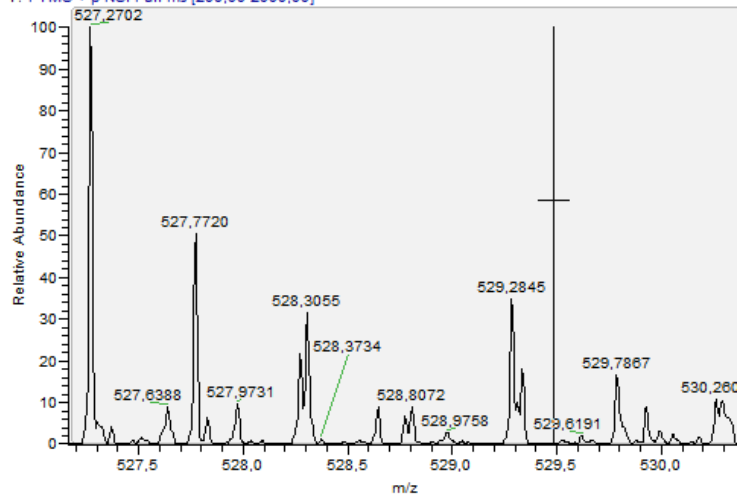

Supplement: s1 [file s1]
