# Supplementary material for: Thimet Oligopeptidase (EC 3.4.24.15) Key Functions Suggested by Knockout Mice Phenotype Characterization
Source: MDPI journal article supplement (doi:10.3390/biom9080382), 2019-08-19

TNF Western blots

|                 | TNF             | B ACTINA        | TNF/BACT %Control |          |
|-----------------|-----------------|-----------------|-------------------|----------|
|                 | Adj. Vol. (Int) | Adj. Vol. (Int) |                   |          |
| WT1             | 1.167.461,67    | 6.920.164,32    | 0,168704          | 0,723361 |
| THOP1-1         | 2.787.342,00    | 6.092.992,07    | 0,457467          | 1,961501 |
| WT2             | 1.013.855,33    | 4.471.864,00    | 0,226719          | 0,972112 |
| THOP1-2         | 1.840.642,00    | 6.593.621,78    | 0,279155          | 1,196945 |
| WT3             | 1.799.854,33    | 5.712.120,95    | 0,315094          | 1,351042 |
| THOP1-3         | 2.417.030,33    | 6.702.637,46    | 0,360609          | 1,546198 |
| WT4             | 798.855,67      | 6.139.185,54    | 0,130124          | 0,557939 |
| THOP1-4         | 2.580.707,33    | 5.901.906,12    | 0,437267          | 1,874888 |
| WT5             | 2.179.940,33    | 5.731.892,00    | 0,380318          | 1,630705 |
| THOP1-5         | 1.843.964,67    | 7.554.004,07    | 0,244104          | 1,046657 |
| WT6             | 1.338.808,00    | 7.505.435,39    | 0,178378          | 0,764841 |
| THOP1-6         | 3.239.711,67    | 6.636.660,44    | 0,488154          | 2,093079 |
|                 |                 |                 |                   |          |
|                 |                 |                 |                   |          |
|                 |                 |                 |                   |          |
|                 |                 |                 |                   |          |
|                 |                 |                 |                   |          |
| Average Control | 0,233222867     |                 |                   |          |
|                 |                 |                 |                   |          |
|                 |                 |                 |                   |          |

Hippocampus

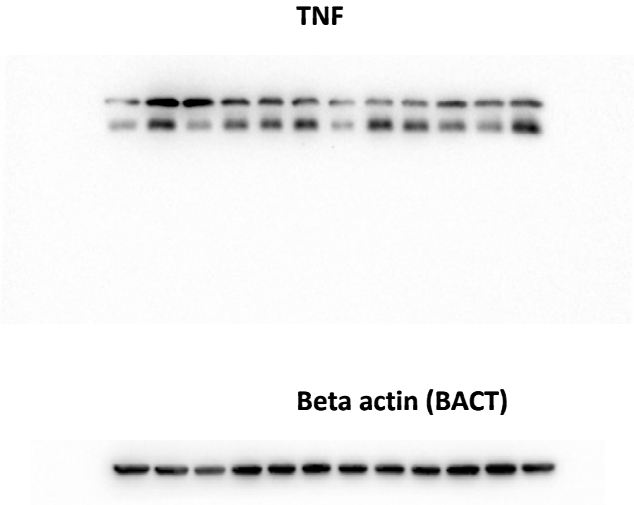

|         | TNF             | B ACTINA        | TNF/BACT   | %Control   |
|---------|-----------------|-----------------|------------|------------|
|         | Adj. Vol. (Int) | Adj. Vol. (Int) |            |            |
| WT1     | 2.064.798,93    | 4.970.143,40    | 0,41544051 | 0,54378866 |
| THOP1-1 | 6.181.236,88    | 6.011.798,14    | 1,02818437 | 1,34583648 |
| WT2     | 4.727.962,84    | 6.493.477,53    | 0,72810953 | 0,9530551  |
| THOP1-2 | 2.495.862,67    | 5.017.280,79    | 0,49745326 | 0,6511388  |
| WT3     | 3.405.637,53    | 4.699.611,40    | 0,72466365 | 0,94854464 |
| THOP1-3 | 4.730.476,58    | 6.307.893,55    | 0,74992968 | 0,98161648 |
| WT4     | 7.023.078,84    | 6.937.872,10    | 1,01228139 | 1,32502036 |
| THOP1-4 | 8.556.587,35    | 6.318.050,93    | 1,35430807 | 1,77271437 |
| WT5     | 4.222.308,26    | 5.626.075,58    | 0,75048908 | 0,9823487  |
| THOP1-5 | 7.064.656,05    | 5.500.711,56    | 1,28431676 | 1,68109962 |
| WT6     | 5.857.025,00    | 6.146.777,08    | 0,95286114 | 1,24724254 |
| THOP1-6 | 9.911.958,84    | 6.654.739,83    | 1,48945851 | 1,94961882 |

Average Contr            0,76

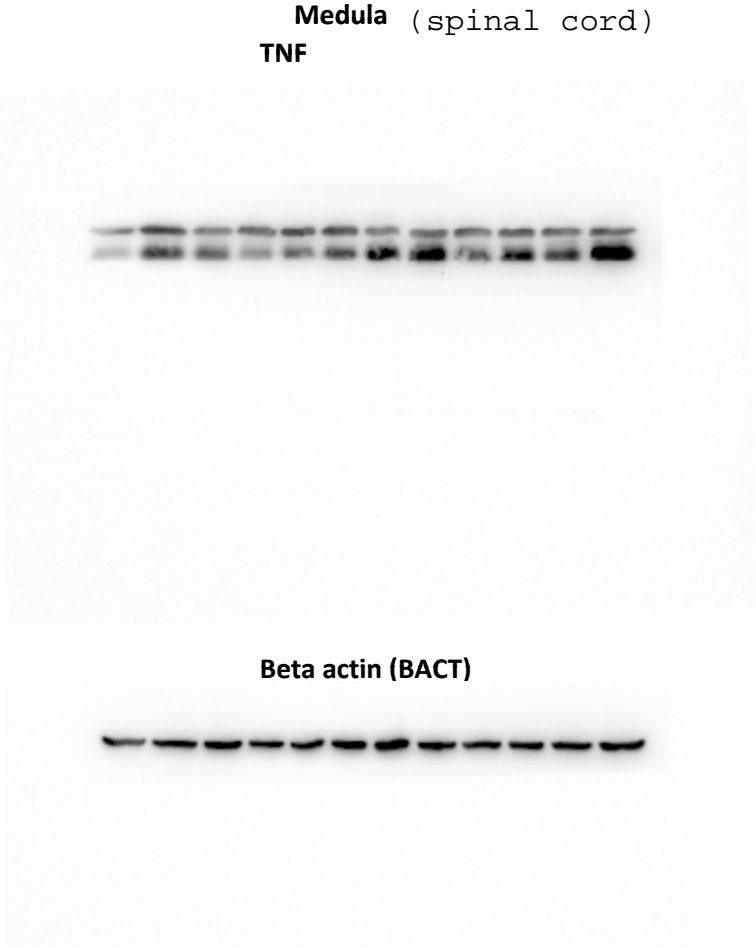

Supplement: s1 [file s1]
