# Supplementary material for: Thimet Oligopeptidase (EC 3.4.24.15) Key Functions Suggested by Knockout Mice Phenotype Characterization
Source: MDPI journal article supplement (doi:10.3390/biom9080382), 2019-08-19
Supplement: s1 [file s1]

**Thimet oligopeptidase (EC 3.4.24.15) key functions suggested by knockout mice phenotype characterization**

Dos Santos, N.B.<sup>1#</sup>, Franco, R.D.<sup>1#</sup>, Camarini, R.<sup>1</sup>, Munhoz, C.D.<sup>1</sup>, Eichler, R.A.S.<sup>1</sup>, Gewehr, M.C.F.<sup>1</sup>, Reckziegel, P.<sup>1</sup>, Llanos, R.P.<sup>1</sup>, Dale, C.S.<sup>2</sup>, Oliveira, V.R.<sup>2</sup>, Borges, V.F.<sup>3</sup>, Lima, B.H.F.<sup>3</sup>, Cunha, F.Q.<sup>3</sup>, Visniauskas, B.<sup>4</sup>, Chagas, J.R.<sup>4</sup>, Tufik, S.<sup>4</sup>, Peres, F.F.<sup>5</sup>, Abilio, V.C.<sup>5</sup>, Florio, J.C.<sup>6</sup>, Iwai, L.K.<sup>7</sup>, Rioli, V.<sup>7</sup>, Prezoto, B.C.<sup>8</sup>, Guimaraes, A.O.<sup>9</sup>, Pesquero, J.B.<sup>9</sup>, Bader, M.<sup>10,11,12,13,14</sup>, Castro, L.M.<sup>15</sup>, and Ferro, E.S.<sup>1\*</sup>

Department of <sup>1</sup>Pharmacology and <sup>2</sup>Anatomy, Biomedical Sciences Institute, and <sup>6</sup>Department of Pathology, Veterinarian Medical School, University of São Paulo (USP), São Paulo, 05508-000; <sup>3</sup>*Department of Pharmacology, Faculty of Medicine of Ribeirão Preto, University of São Paulo, Ribeirão Preto, SP, 14049-900*; Departments of <sup>4</sup>Psychobiology, <sup>5</sup>Pharmacology and <sup>9</sup>Biophysics, Federal University of São Paulo (UNIFESP), São Paulo, 04023-062; <sup>7</sup>Special Laboratory of Applied Toxinology (LETA), Center of Toxins, Immune Response and Cell Signaling (CETICS), <sup>8</sup>Pharmacology Department, Butantan Institute, 05503-000, São Paulo; <sup>10</sup>Max-Delbrück-Center for Molecular Medicine, D-13125, Berlin, Germany, <sup>11</sup>Charité - Universitätsmedizin Berlin, <sup>12</sup>Berlin Institute of Health (BIH), Berlin, Germany, <sup>13</sup>DZHK (German Center for Cardiovascular Research), Partner Site Berlin, Berlin, Germany, <sup>14</sup>Institute for Biology, University of Lübeck, Lübeck, Germany, <sup>15</sup>Biosciences Institute, São Paulo State University (UNESP), São Vicente, 11330-900; SP, Brazil.

**Running Title:** THOP1 knockout mice

**\*To whom correspondence should be addressed:** Emer S. Ferro, PhD, Professor, Av. Prof. Lineu Prestes 1524, Sala 317, São Paulo, SP, 05508-000, Brazil, Phone: +55-11-3091-7310, Fax: +55-11-3091-7322, e-mail: [eferro@usp.br](mailto:eferro@usp.br)

**#These two authors contributed equally**

**Keywords:** THOP1; neurodegeneration; inflammation; sepsis; MHC-I; peptidome.

## Supplementary information for Trap THOP1 knockout generation

### Introduction

Thimet Oligopeptidase (THOP1) gene trap knockout mouse strain CSG163 was generated by C57Bl/6 blastocist micro-injection of genetically modified Embryonic Stem Cells (129ola) obtained from Baygenomics through the International Gene Trap Consortium (IGTC, <http://www.genetrap.org/>).

### Results

The genetically modified INTRON allele of CSG163 strain have the gene trap vector pGT0Lxf inserted at THOP1 intron 5 (Figure 1), as evidenced by sequencing 5'RACE cDNA from the original CSG163 ES cell line (DX812807), used to generate this mice strain (The detailed reports for this ES Cell line can be found at the following web link: <http://www.genetrap.org/cgi-bin/annotation.py?cellline=CSG163&type=detail>)

Based in this ES cell line 5'RACE cDNA sequences, the gene trap vector sequence and the genomic and mRNA sequences for the THOP1 gene we designed primers and performed RT-PCR, PCR and sequencing experiments to confirm the expected transgenic mRNA and to map the genomic site of the gene trap vector integration in the THOP1 genomic *locus*, as described below.

We also collected tissues from wild type and homozygous gene trap mutant CSG163 mice and verified by western blot, with a THOP1 catalytic site commercial antibody, the absence of the 78.8 KDa predicted THOP1 protein only in the studied tissues of homologous CSG163 mutants.

Taken together, these results present strong evidence that the CSG163 mice strain is a correct THOP1 gene trap knockout strain and can be very useful in studies of this gene biological function.

### Confirming by RT- PCR the hybrid mRNA formed by the 5' region of THOP1 mRNA fused to vector derived Beta-Geo mRNA sequence

In order to check the presence of the THOP1 wild type (WT) mRNA and the expected Transgenic mRNA resulting from the Gene trap vector insertion in the THOP1 *locus*, hereafter referred as THOP1-Beta-Geo, we designed primers (additional information 1) and performed RT-PCRs on total RNA obtained from tail of seven CSG163 mice .

We were able to PCR amplify from the cDNA of some of the samples the expected 200bp and 449bp fragments in two different reactions for the transgenic THOP1-Beta-Geo mRNA (Figure 1). These amplicons were purified and confirmed by sequencing (additional information 2). Therefore, we concluded that the CSG163 mice strain have the described gene trap insertion in the THOP1 *locus*, and the THOP1-Beta-Geo mRNA was expressed in the tail tissues.

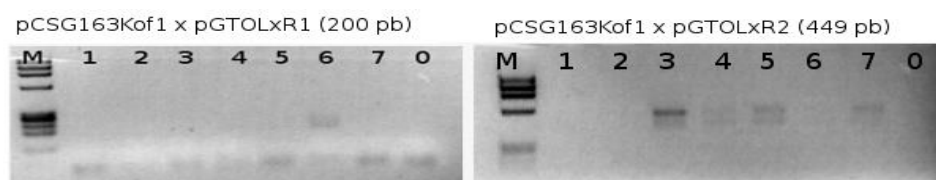

**Figure 1.** RT-PCR analysis of CGS163 mice tail total RNA. Negative picture of 2% agarose gels stained with ethidium bromide and visualized under UV light after electrophoresis of PCRs performed with the indicated primers on 1/10 dilution of cDNAs obtained from 3 micro-gram of Tail Total RNA using the reverse transcriptase M-MLV (Invitrogen) of several animals, Lanes 1 to 7. Lanes M are the DNA marker □X174 RF DNA/Hae III Fragments (Invitrogen).

## Mapping the genomic gene trap insertion position on the modified THOP1 allele of the CSG163 mice strain

We were able to PCR amplify from CSG163 heterozygotes mouse tail genomic DNA (gDNA) the expected a DNA fragment of about 2.6 kb using the forward primer pCSG163KOf1 with the reverse primer pGT0LxR2 (Figure 2).

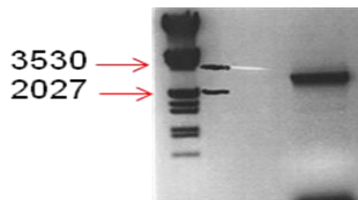

**Figure 2.** Product of the long-range PCR. This reaction was done using forward prime pCSG163KoF1, that anneals on the exon 5 of mouse THOP1 gene, and reverse prime pGTOLxR2, that anneals on gene trap vector inserted. Negative picture of 0.7% agarose gel stained with ethidium bromide and visualized under UV light after electrophoresis stained with bromide ethidium. Lane 1: Lambda DNA/EcoRI+HindIII Marker, 3 (Fermentas); lane 2- 2,600 pb amplicon of CSG gDNA gene trap insertion region.

Sequencing this fragment showed that the gene trap vector inserted 438 nucleotides downstream of the THOP1 exon 5/intron 5 boundary (Additional information 3). This information allowed us to design primers for gDNA based PCR genotyping of the mice from the CSG163 strain (Figure 3), and define the best protocol for genotyping that is summarized at Table 1.

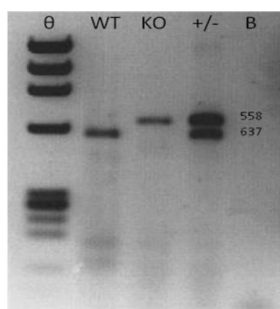

### Supplementary information for Trap THOP1 knockout generation

**Figure 3.** Product of PCR using tree primes and gDNA extract from tails. Negative picture of 2% agarose gel stained with ethidium bromide and visualized under UV light after electrophoresis stained with bromide ethidium. Lane 1:  $\lambda$ X174 RF DNA/Hae III Fragments (Invitrogen); lane 2: WT 558 bp amplicon; lane 3: KO 637 bp amplicon; lane 4 Heterozygous amplicons and lane 5 PCR control without template.

## Supplementary information for Trap THOP1 knockout generation

**Table 1: Protocol for gDNA genotyping**

|               |              |                    |                         |
|---------------|--------------|--------------------|-------------------------|
| <i>Animal</i> |              | <i>strain name</i> | <i>THOP1 CSG163 -/-</i> |
| <i>X</i>      | <i>mouse</i> | <i>background</i>  | <i>129/C57BL/6</i>      |

| <i>Primers</i> | <i>name</i> | <i>sequence</i>            | <i>stock-conz</i> | <i>diluti on</i> | <i>working</i> |
|----------------|-------------|----------------------------|-------------------|------------------|----------------|
| <b>fw</b>      | pCSG163KOf1 | 5'-TCGACTTCAACAAGAACCTC-3' | 100 ng/uL         | 10 x             | 10 ng/uL       |
| <b>rev 1</b>   | pCSG163wtr1 | 5'-TGCCTTCTCCAGAGAGCTC-3'  | 100 ng/uL         | 10 x             | 10 ng/uL       |
| <b>rev 2</b>   | CSGKOR2     | 5'-GACGGTCACAGCTTGTCTG-3'  | 100 ng/uL         | 10 x             | 10 ng/uL       |

### PCR-protocol to genotype:

|                          | <b>x1</b>    | <b>25</b>     |
|--------------------------|--------------|---------------|
|                          | <b>µl</b>    | <b>µl</b>     |
| <b>10x PCR Buffer</b>    | <b>2,50</b>  | <b>68,75</b>  |
| <b>dNTP (10 or 5 mM)</b> | <b>1,25</b>  | <b>34,38</b>  |
| <b>MgCl2</b>             | <b>0,75</b>  | <b>20,63</b>  |
| <b>Primer fw</b>         | <b>0,50</b>  | <b>13,75</b>  |
| <b>Primer rev1</b>       | <b>0,10</b>  | <b>2,75</b>   |
| <b>Primer rev2</b>       | <b>0,50</b>  | <b>13,75</b>  |
| <b>Taq polimerase</b>    | <b>0,20</b>  | <b>5,50</b>   |
| <b>H2O</b>               | <b>18,20</b> | <b>500,50</b> |
| <b>DNA</b>               | <b>1,00</b>  |               |
| <b>Master Mix</b>        | <b>24,00</b> | <b>660,00</b> |
| <b>Total Vol.</b>        | <b>25,00</b> |               |

### PCR-program

|              |                    |
|--------------|--------------------|
| 95 oC        | 5 min              |
| <b>95 oC</b> | <b>15 sec</b>      |
| <b>60 oC</b> | <b>15 sec x 45</b> |
| <b>72 oC</b> | <b>30 sec</b>      |
| 72 oC        | 3 min              |
| 10 oC        | for ever           |

### Size of Product:

|             |        |
|-------------|--------|
| WT amplicon | 558 bp |
| KO amplicon | 637 bp |

**Agarose Gel: 2%**

The resulting DNA fragments were once more sequenced and confirmed (additional information 4).

Furthermore, the sequencing results confirmed that there was a recombination of gene trap vector sequences that could have occurred even before ES cell transfection. The gene trap vector pGT0Lxf sequence just upstream of the Beta-Geo gene is common to the antisense vector sequence of part of the ampicilin resistance gene, which probable facilitated this event.

## Supplementary information for Trap THOP1 knockout generation

**Additional information 1: nucleotide sequences of the cDNA region of the THOP1 and THOP1-Beta-Geo transgenic mRNAs used to design RT-PCR primers.**

PRIMERS sequences:

pGT0LxR1: 5' CTCTAGAGTCCAGATCTGCG 3'  
pGT0LxR2: 5' TGTAGATGGGCGCATCGTA 3'  
pCSG163Kof1: 5' TCGACTTCAACAAGAACCTC 3'  
pCSG163wtr1: 5' TGCCTTCTCCAGAGAGCTC 3'

The cDNA nucleotide sequence of the 5' region of the wild type THOP1 mRNA ([NM\\_022653.4](#)):

5' ATGAAGCCCCCGCAGCCTGTGCTGGGGACGTGGTGGATGCAGCATCCCCAGCCTCCACCGTGAATCATC  
TTCGCTGGGATCTGAGCGCACAGCAGATCAGGGCTCTAACCACGCAGCTCATCGAGCAGACCAAGTGTGTGT  
ACGACCGAGTGGGTGCTCAGAACTTCGAGGATGTGTCTGATGAGAGCACACTGAAGGCACTGGCTGACGTGG  
AGGTCACCTACACAGTGCAGAGGAACATTTCTCGACTTCCCCAACACGTGTCCCCGTGCAAGGACATCCGTG  
CAGCCAGCACAGAGGCTGACAAGAAGCTCTCGGAGTTTGATGTAGAGATGAGCATGAGACAGGACGTGTACC  
AGAGGGTCTGTGGCTGCAGGAGAAAAACCCGAAAGATTCCCTGAAGCCTGAAGCAGCTCGCTACCTGGAGC  
GGCTCATCAAGCTGGGCCGGAGAAACGGCCTCCACTTACCTCAGGACACACAAGAGAAGATCAAGAACATCA  
AGAAGAGGCTGAGCCTGCTGTGCA **TCGACTTCAACAAGAACCTC** AACGAGGACACCACCTTCCTGCCCTTCA  
CAAGAGAGGAGCTGGGTGGGCTCCCGGAGGACTTTCT **GAGCTCTCTGGAGAAGGCA** GAGGACGGCAAGCTGA  
AGGTCACCCTCAAGTACCCTCACTACTTCCCGCTGTTGAAGAAGTGCCATGTGCCGGAGACACGACGCCTGT  
TGGAGGAGGCCTTCAACTGTCGCTGCAAGGAGGAGAACTGTGCCA 3'

### Legend:

**Highlighted in green** - the sequence of forward primer pSGS163Kof1,  
**Highlighted in blue** - the sequence that reverse primer pSGS163WTR1 anneals.

The cDNA nucleotide sequence of the 5' region of the expected THOP1-Beta-Geo transgenic mRNA (CSGri), defined on the basis of the gene trap vector [pGT0Lxf](#) and the 5'RACE gene trap cDNA ([DX812807](#)) sequences:

### CSGri:

**GCGTGAGACCAGAGGAGGGCCGTCGCCGCCTCGCGCGCAGCCGACCGCCATGAAGCCCCCGCAGCCTGTGC**  
**TGGGGACGTGGTGGATGCAGCATCCCCAGCCTCCACCGTGAATCATCTTCGCTGGGATCTGAGCGCACAGCA**  
**GATCAGGGCTCTAACCACGCAGCTCATCGAGCAGACCAAGTGTGTGTACGACCGAGTGGGTGCTCAGAACTT**  
**CGAGGATGTGTCGTATGAGAGCACACTGAAGGCACTGGCTGACGTGGAGGTCACCTACACAGTGCAGAGGAA**  
**CATTCTCGACTTCCCCAACACGTGTCCCCGTGCAAGGACATCCGTGCAGCCAGCACAGAGGCTGACAAGAA**  
**GCTCTCGGAGTTTGATGTAGAGATGAGCATGAGACAGGACGTGTACCAGAGGGTCTGTGGCTGCAGGAGAA**  
**AACCCGAAAGATTCCCTGAAGCCTGAAGCAGCTCGCTACCTGGAGCGGCTCATCAAGCTGGGCCGGAGAAA**  
**CGGCCTCCACTTACCTCAGGACACACAAGAGAAGATCAAGAACATCAAGAAGAGGCTGAGCCTGCTGTGCA**  
**CGACTTCAACAAGAACCTC** AACGAGGACACCACCTTCCTGCCCTTCACAAGAGAGGAGCTGG **AAACGCTGGT**  
**GAAAGTAAAAGATGCTGAAGATCAGTTGGGTGCACGAGTGGGTACATCGAACTGGATCTCAACAGCGGTCC**  
**CAGGTCCCGAAAACCAAAGAAGAAGAAC** GCAGATCGCATCGATAACTTCGTATAGCATACATTATACGAAGT  
TAT **CGCAGATCTGGACTCTAGAG** GATCCCGTCGTTTACAACGTCGTGACTGGGAAAACCCCTGGCGTTACCC  
AACTTAATCGCCTTGACGACATCCCCCTTTCCGCCAGCTGGCGTAATAGCGAAGAGGGCCCGCACCGATCGCC  
CTTCCCAACAGTTGCGCAGCCTGAATGGCGAATGGCGCTTTGCTGTTTCCGGCACCAGAAGCGGTGCCGG  
AAAGCTGGCTGGAGTGCATCTTCCCTGAGGCCGATACTGTCGTCTGCCCTCAAACCTGGCAG **ATGCACGGTT**  
**ACGATGCGCCCATCTACA**

### Legend:

**Blue bold letters** - sequence corresponding to the 5' region of THOP1 mRNA up to the end of exon 5,  
**highlighted in green** - the sequence of forward primer pSGS163Kof1

## Supplementary information for Trap THOP1 knockout generation

**yellow highlighted black letters** - the 7897 to 7977 nucleotide sequence of the gene trap vector pGTOLxf in the antisense orientation that resulted from a non documented recombination event,

**In green letters** - gene Trap vector sequence corresponding to the end of the intronic region, splice acceptor, the initial exon 2 nucleotides of the mouse engrailed 2 gene,

In black letters - pGT0Lxf vector sequences, were: underlined is a Lox site, in bold is the initial coding sequence of Beta-Geo

**Highlighted in blue** - the sequence that reverse primer pGTLxR1 anneals,

**Highlighted in dark blue** - the sequence that reverse primer pGTLxR2 anneals.



## Supplementary information for Trap THOP1 knockout generation

### Additional information 2: Sequence analysis of the mice CSG163 strain Tail RT-PCR obtained DNA fragments

Comparison of the nucleotide sequences obtained by RT-PCR and the same cDNA region of the THOP1 and THOP1-Beta-Geo transgenic mRNAs used to design RT-PCR primers as shown in additional file 1.

Sequencing results for the transgenic 200bp cDNA Fragment (KoG1) obtained by RT-PCR with primers: pCSG163KOf1 x pGT0LxR1 (Figure 2, PCR3 sample 6).

#### Seq01: KoG1 sequenced with pGT0LxR1 (files: F11\_ba036-g1-pr1\_002.seq)

```
5'AGTCTCTTGTTTTCGACTGGGTaCCGCTGTTGATGTTTACGATGTATAGATTCGTGCACCCAACTGAT
CTTAGCACTTTTACTTTTGAGCGTTTCCAGCTCCTCTCTTGTGAAGGGCAGGAAGGTGGTGTCTCTCGTTGAG
GTTCTTGTTGAAGTTGAA
GT 3'
```

#### Seq02: KoG1 sequenced with pCSG163KOf1 (files: E11\_ba036-g1-pg\_001.seq)

```
5'AAGGGCACCCCTTCCTGCCCTTCCAAGAGAGAGCTGGAAAAGCAGGTGAAAGTAAAAGATGCTGAAGATC
AGTTGGGTGCAAAGAGTGGGTACATCGAACTGGATCTCAACAGCGGTCCCAGGTCCCGAAAACCAAAGAAG
AAGAACGCAGATCTGGAC
TCTAGAG 3'
```

Obs.: the sequencing stopped a little before the initial nucleotides of the Lox site located just upstream of the reverse primer pGT0LxR1.

#### Blast comparison of Seq01 with the transgenic 200bp cDNA Fragment (KoG1):

Score = 170 bits (188), Expect = 6e-47 Identities = 139/162 (85%),  
Gaps = 9/162 (5%) Strand=Plus/Minus

|       |     |                                                               |     |
|-------|-----|---------------------------------------------------------------|-----|
| CSGri | 576 | TCGACTTCAACAAGAACCTCAACGAGGACACCACCTTCCTGCCCTTCACAAGAGAGGAGC  | 635 |
|       |     |                                                               |     |
| seq01 | 159 | TCAACTTCAACAAGAACCTCAACGAGGACACCACCTTCCTGCCCTTCACAAGAGAGGAGC  | 100 |
| CSGri | 636 | TGGAAACGCTGGTGAAAGTAAAAGATGCTGAAGATCAGTTGGGTGCACGAGTGGGTACACA | 695 |
|       |     |                                                               |     |
| seq01 | 99  | TGGAAACGCT--CAAAAGTAAAAG-TGCT-AAGATCAGTTGGGTGCACGAAT-CTATACA  | 45  |
| CSGri | 696 | TCGAACTGGATCTCAACAGCGGTCCCAGGTCCCGAAAACCAA                    | 737 |
|       |     |                                                               |     |
| seq01 | 44  | TCG---TAAACATCAACAGCGGTACCCAGT-CCGAAAACCAA                    | 7   |

#### Blast comparison of Seq02 with the transgenic 200bp cDNA Fragment (KoG1):

Score = 233 bits (258), Expect = 6e-66 Identities = 149/157 (94%),  
Gaps = 4/157 (2%) Strand=Plus/Plus

|       |     |                                                              |     |
|-------|-----|--------------------------------------------------------------|-----|
| CSGri | 600 | AGGACACCACCTTCCTGCCCTTCACAAGAGAGGAGCTGGAAACGCTGGTGAAAGTAAAAG | 659 |
|       |     |                                                              |     |
| seq02 | 2   | AGGGCACC-CCTTCCTGCCCTTC-CAAGAGAG-AGCTGGAAAAGCAGGTGAAAGTAAAAG | 58  |
| CSGri | 660 | ATGCTGAAGATCAGTTGGGTGCA-C-GAGTGGGTACATCGAACTGGATCTCAACAGCGGT | 718 |
|       |     |                                                              |     |

### Supplementary information for Trap THOP1 knockout generation

|       |     |                                                             |     |
|-------|-----|-------------------------------------------------------------|-----|
| seq02 | 59  | ATGCTGAAGATCAGTTGGGTGCAAAGAGTGGGTACATCGAACTGGATCTCAACAGCGGT |     |
| 118   |     |                                                             |     |
| CSGri | 719 | CCCAGGTCCCGAAAACCAAAGAAGAAGAACGCAGATC                       | 755 |
|       |     |                                                             |     |
| seq02 | 119 | CCCAGGTCCCGAAAACCAAAGAAGAAGAACGCAGATC                       | 155 |

## Supplementary information for Trap THOP1 knockout generation

### Additional information 2, continuation:

Sequencing results for the transgenic 449bp cDNA Fragment (KoG2) obtained by RT-PCR with primers: pCSG163Kof1 x pGT0LxR2 (Figure 2, PCR2 samples 3, 4, 5 and 7 top band).

#### Seq03 = Fragment KoG2 sequenced with pGT0LxR2 (file: A02\_ba036-g2-pr2\_001.seq)

```
5'ATGTCTGAGTTTGAGGGCGACGACAGTATCGGCCTCGGAAGATCGCACTTAGCCGCTTTCCGGCACCGCT
TCTGGTGCCGGAACAGGCAAAGCGCCATTCGCCATTCAGGCTGCGCAACTGTTGGAAGGGCGATCGGTG
CGGGCCTCTTCGCTATTACGCCAGCTGGCGAAAGGGGGATGTGCTGCAAGGCGATTAAGTTGGGTAACGCCA
GGGTTTTCCAGTCACGACGTTGTAAAACGACGGGATCCTCTAGAGTCCAGATCTGCGATAACTTCGTATAA
TGTATGCTATACGAAGTTATCGATCTGCGATCTGCGTTCTTCTTCTTTGGTTTTCGGGACCTGGGACCGCTG
TTGAGATCCAGTTCGATGTAACCCACTCGTGCACCCAACTGATCTTCAGCATCTTTTACTTTACCAGCGTT
TCCAGCTCCTCTCTTGTGAAGGGCAGGAAGGTGGTGTCTCGTTGAGGTTCTTGTGAAGTCGAA 3'
```

#### Seq04 = Fragment KoG2 sequenced with pCSG163Kof1 (file: E12\_ba036-g2-pg\_001.seq)

```
5'AGGACCCCTTCCTGCCCTTCCAAGAGAGGAGCTGGAAACGCTGGTGAAAGTAAAAGATGCTGAAGATCAG
TTGGGTGCACGAGTGGGTACATCGAACTGGATCTCAACAGCGGTCCCAGGTCCCGAAAACCAAAGAAGAAG
AACGCAGATCGCAGATCGATAACTTCGTATAGCATAACATTATACGAAGTTATCGCAGATCTGGACTCTAGAG
GATCCCGTCGTTTTACAACGTCGTGACTGGGAAAACCTGGCGTTACCCAACTTAATCGCCTTGCAGCACAT
CCCCCTTTTCGCCAGCTGGCGTAATAGCGAAGAGGCCCGCACCGATCGCCCTTCCCAACAGTTGCGCAGCCTG
AATGGCGAATGGCGCTTTGCCTGGTTTCCGGCACCCAGAAAGCGGTGCCGGAAGCTGGCTGGAGTGCAGTCTT
CCTGAGGCCGATACTGTCTGTCGTCCCCTCAAACCTGGCAGATGCACGGTTACGATGCGCCCATCTACAA 3'
```

#### Blast comparison of Seq03 with the transgenic 449bp cDNA Fragment (KoG2):

Score = 836 bits (926), Expect = 0.0 Identities = 484/492 (98%), Gaps = 7/492 (1%) Strand=Plus/Minus

|       |     |                                                               |  |
|-------|-----|---------------------------------------------------------------|--|
| CSGri | 576 | TCGACTTCAACAAGAACCTCAACGAGGACACCACCTTCCTGCCCTTCACAAGAGAGGAGC  |  |
|       | 635 |                                                               |  |
|       |     |                                                               |  |
| seq03 | 494 | TCGACTTCAACAAGAACCTCAACGAGGACACCACCTTCCTGCCCTTCACAAGAGAGGAGC  |  |
|       | 435 |                                                               |  |
| CSGri | 636 | TGGAAACGCTGGTGAAAGTAAAAGATGCTGAAGATCAGTTGGGTGCACGAGTGGGTTACA  |  |
|       | 695 |                                                               |  |
|       |     |                                                               |  |
| seq03 | 434 | TGGAAACGCTGGTGAAAGTAAAAGATGCTGAAGATCAGTTGGGTGCACGAGTGGGTTACA  |  |
|       | 375 |                                                               |  |
| CSGri | 696 | TCGAACTGGATCTCAACAGCGGTCCCAGGTCCCGAAAACCAAAGAAGAAGAACGCAGATC  |  |
|       | 755 |                                                               |  |
|       |     |                                                               |  |
| seq03 | 374 | TCGAACTGGATCTCAACAGCGGTCCCAGGTCCCGAAAACCAAAGAAGAAGAACGCAGATC  |  |
|       | 315 |                                                               |  |
| CSGri | 756 | GCA--TCGATAACTTCGTATAGCATAACATTATACGAAGTTATCGCAGATCTGGACTCTAG |  |
|       | 813 |                                                               |  |
|       |     |                                                               |  |
| seq03 | 314 | GCAGATCGATAACTTCGTATAGCATAACATTATACGAAGTTATCGCAGATCTGGACTCTAG |  |
|       | 255 |                                                               |  |
| CSGri | 814 | AGGATCCCGTCGTTTTTACAACGTCGTGACTGGGAAAACCTGGCGTTACCCAACTTAATC  |  |
|       | 873 |                                                               |  |
|       |     |                                                               |  |

## Supplementary information for Trap THOP1 knockout generation

|               |      |                                                                |
|---------------|------|----------------------------------------------------------------|
| seq03<br>195  | 254  | AGGATCCCGTCGTTTTACAACGTCGTGACTGGGAAAACCCCTGGCGTTACCCAACTTAATC  |
| CSGri<br>933  | 874  | GCCTTGACGACACATCCCCCTTTTCGCCAGCTGGCGTAATAGCGAAGAGGCCCGCACCGATC |
| seq03<br>135  | 194  | GCCTTGACGACACATCCCCCTTTTCGCCAGCTGGCGTAATAGCGAAGAGGCCCGCACCGATC |
| CSGri<br>993  | 934  | GCCCTTCCCAACAGTTGCGCAGCCTGAATGGCGAATGGCGCTTTGCCTGGTTTCCGGCAC   |
| seq03<br>75   | 134  | GCCCTTCCCAACAGTTGCGCAGCCTGAATGGCGAATGGCGCTTTGCCTGGTTTCCGGCAC   |
| CSGri<br>1053 | 994  | CAGAAGCGGTGCCGAAAGCTGGCTGGAGTGCGATCTTCTGAGGCCGATACTGTCGTCG     |
| seq03<br>18   | 74   | CAGAAGCGGTGCCGAAAGC-GGCT-AAGTGCGATCTTCC-GAGGCCGATACTGTCGTCG    |
| CSGri         | 1054 | TCCCCTCAAAC 1065                                               |
| seq03         | 17   | --CCCTCAAAC 8                                                  |

### Blast comparison of Seq04 with the transgenic 200bp cDNA Fragment (KoG1):

Score = 868 bits (962), Expect = 0.0 Identities = 489/492 (99%), Gaps = 3/492 (0%) Strand=Plus/Plus

|              |     |                                                                 |
|--------------|-----|-----------------------------------------------------------------|
| CSGri<br>668 | 609 | CCTTCCTGCCCTTCACAAGAGAGGAGCTGGAAACGCTGGTGAAAGTAAAAGATGCTGAAG    |
| seq04<br>65  | 7   | CCTTCCTGCCCTTC-CAAGAGAGGAGCTGGAAACGCTGGTGAAAGTAAAAGATGCTGAAG    |
| CSGri<br>728 | 669 | ATCAGTTGGGTGCACGAGTGGGTACATCGAACTGGATCTCAACAGCGGTCCCAGGTCCC     |
| seq04<br>125 | 66  | ATCAGTTGGGTGCACGAGTGGGTACATCGAACTGGATCTCAACAGCGGTCCCAGGTCCC     |
| CSGri<br>786 | 729 | GAAAACCAAAGAAGAAGAACGCAGATCGCA--TCGATAACTTCGTATAGCATACATTATA    |
| seq04<br>185 | 126 | GAAAACCAAAGAAGAAGAACGCAGATCGCAGATCGATAACTTCGTATAGCATACATTATA    |
| CSGri<br>846 | 787 | CGAAGTTATCGCAGATCTGGACTCTAGAGGATCCCGTCGTTTTACAACGTCGTGACTGGG    |
| seq04<br>245 | 186 | CGAAGTTATCGCAGATCTGGACTCTAGAGGATCCCGTCGTTTTACAACGTCGTGACTGGG    |
| CSGri<br>906 | 847 | AAAACCCCTGGCGTTACCCAACTTAATCGCCTTGACGACACATCCCCCTTTTCGCCAGCTGGC |
| seq04        | 246 | AAAACCCCTGGCGTTACCCAACTTAATCGCCTTGACGACACATCCCCCTTTTCGCCAGCTGGC |

### Supplementary information for Trap THOP1 knockout generation

305

|       |      |                                                               |      |
|-------|------|---------------------------------------------------------------|------|
| CSGri | 907  | GTAATAGCGAAGAGGCCCCGCACCGATCGCCCTTCCCAACAGTTGCGCAGCCTGAATGGCG |      |
| 966   |      |                                                               |      |
|       |      |                                                               |      |
| seq04 | 306  | GTAATAGCGAAGAGGCCCCGCACCGATCGCCCTTCCCAACAGTTGCGCAGCCTGAATGGCG |      |
| 365   |      |                                                               |      |
|       |      |                                                               |      |
| CSGri | 967  | AATGGCGCTTTGCCTGGTTTCCGGCACCAGAAGCGGTGCCGAAAGCTGGCTGGAGTGCG   |      |
| 1026  |      |                                                               |      |
|       |      |                                                               |      |
| seq04 | 366  | AATGGCGCTTTGCCTGGTTTCCGGCACCAGAAGCGGTGCCGAAAGCTGGCTGGAGTGCG   |      |
| 425   |      |                                                               |      |
|       |      |                                                               |      |
| CSGri | 1027 | ATCTTCCTGAGGCCGATACTGTCGTCGTCCCCTCAAACCTGGCAGATGCACGGTTACGATG |      |
| 1086  |      |                                                               |      |
|       |      |                                                               |      |
| seq04 | 426  | ATCTTCCTGAGGCCGATACTGTCGTCGTCCCCTCAAACCTGGCAGATGCACGGTTACGATG |      |
| 485   |      |                                                               |      |
|       |      |                                                               |      |
| CSGri | 1087 | CGCCCATCTACA                                                  | 1098 |
|       |      |                                                               |      |
| seq04 | 486  | CGCCCATCTACA                                                  | 497  |

## Supplementary information for Trap THOP1 knockout generation

### Additional information 3: Sequence analysis of the PCR DNA fragments obtained from mice CSG163 strain Tail genomic DNA.

Comparison of the nucleotide sequences obtained by long range PCR, the gene trap vector pGT0Lxf and the THOP1 exon 5 to 6 gDNA region. This comparisons were used to define partially the expected sequence for and THOP1-Beta-Geo transgenic gDNA (gCSG1) in order to design gDNA based genotyping primers.

Wild type genomic DNA nucleotide sequence of THOP1 exon 5 to exon 6 region (gWT):

```
5' AAGATCAAGAACATCAAGAAGAGGCTGAGCCTGCTGTGCATCGACTTCAACAAGAACCTCAACGAGGACA  
CCACCTTCCTGCCCTTCACAAGAGAGGAGCTGGgtgagtacacggaatgatggtCgcacagctcccaaggac  
actgcagacagagctgggctctgctgacccagatccctgagctggggcagccgtgttgctccttgccgttttc  
tgtgagcaagtgtctggggccacaggcaccagccacactgtggggttagtttaggagtaggggtggtgag  
tctcagcccgagctcgggaccttgagcatcagcagcgctgtgtgctgtgtggccttcgctctatggctgt  
ggtaccttcaactctctggtctgaggccccagcatctctggcgaggccccattccctgctcagcactcatctc  
acttgctgactggggaTatcctgccaaggtcacctacagccctGggaggttcccttcaggttccaagctcag  
agctgctggcctgacttcaaggctcCgggctgagcagcgtccgctgcatccacagGTGGGCTCCCGGAGGAC  
TTTCTGAGCTCTCTGGAGAAGGCAGAGGACGGCAAGCTGAAGGTCACCCTCAAGTACCCTCACTACTTCCCG  
CTGTTGAAGAAGTGCCATGTGCCGGAGACACGACGCCTGTTGGAGGAGGCCTTCAACTGTCGCTGCAAGGAG  
3'
```

#### Legend:

**Bold and blue letters** - exon 5 and 6 sequences

**Highlighted in green** - the sequence of forward primer pSG163Kof1,

**Highlighted in blue** - the sequence that reverse primer pSG163WTR1 anneals.

Sequencing results for the transgenic DNA Fragment (gCSG1) obtained by long range PCR with primers: pCSG163Kof1 x pGT0LxR2 (Figure 3).

#### Seq05: Fragment gCSG2 sequenced with pCSG163kof1 (C05\_ba049-gk-gf1\_003.seq)

```
5' AAGAGACCTTCCTGCCCTTCCAAGCGAGAGCTGGGTGAGTACACGGAATGATGTTTCGCACAGCTCCCAAG  
GACACTGCAGACAGAGCTGGGCTCTGCTGACCCAGATCCCTGAGCTGGGGCAGCCGTGTTGTCTTGCCGTT  
TTCTGTGAGCAAGTGTCTGGGGCCACAGGCACCCAGCCACACTGTGGGGTTTAGTTTtaggagtaggggtggt  
GAGTCTCAGCCCGAGTCTGGGACCTTGAGCATCAGCACGGCTGTGTGCTGTGTGGCCTTCGCTCTATGGC  
TGTGGTACCTTCACTCTCTGGTCTGAGGCCCCAGCATCTCTGGCGAGGCCCATTCCTGCTCAGCACTCATC  
CTCACTTGCTGACTGGGGATATCCTGCCAAGGTCACCTACAGCCCTGGGAGGTTCCCTTCAGGTTCCAAGCT  
CAGAGCTGCTGGCCTGACTTCAAGGCTCCGGGCTGAGCAGCGCATATGGTGCACCTCTCAGTACAATCTGCTC  
TGATGCCGCATAGTTAAGCCAGCCCCGACACCCGCCAACACCCGCTGACGCGCCCTGACGGGCTTGTCTGCT  
CCCGGCATCCGCTTACAGACAAGCTGTGACCGTCTCCGGGAGCTGCATGTGTTCAGAGGTTT 3'
```

#### Seq06: Fragment gCSG2 sequenced with pGT0LxR2 (D05\_ba049-gk-r2\_004.seq)

```
5' CCGGATCTGCAGTTTgagggagacgacagtatCGGCCTCAGGAAGATCGCACTCCAGCCAGCTTTCGGGC  
ACCGCTTCTGGTGCCGGAACCAGGCAAAGCGCCATTCGCCATTCAGGCTGCGCAACTGTTGGGAAGGGCGA  
TCGGTGCGGGCCTCTTCGCTATTACGCCAGCTGGCGAAAGGGGGATGTGCTGCAAGGCGATTAAAGTTGGGTA  
ACGCCAGGGTTTTTCCAGTCACGACGTTGTAAAACGACGGGATCCTCTAGAGTCCAGATCTGCGATAACTTC  
GTATAATGTATGCTATACGAAGTTATCGATCTGCGATCTGCGTTCTTCTTTTGGTTTTTCGGGACCTGG 3'
```

#### Blast comparison of Seq05 with the pGT0Lxf gene trap vector:

Score = 298 bits (330), Expect = 6e-84 Identities = 167/168 (99%),  
Gaps = 0/168 (0%) Strand=Plus/Minus

Vect. 8276 AAACCTCTGACACATGCAGCTCCCGGAGACGGTCACAGCTTGTCTGTAAGCGGATGCCGG  
8335

|||||

## Supplementary information for Trap THOP1 knockout generation

```

seq05  635  AAACCTCTGACACATGCAGCTCCCGGAGACGGTCACAGCTTGTCTGTAAGCGGATGCCGG
    576
Vect.  8336  GAGCAGACAAGCCCGTCAGGGCGCGTCAGCGGGTGTGGCGGGTGTGCGGGCTGGCTTAA
    8395
      ||||||||||||||||||||||||||||||||||||||||||||||||||||||||
seq05  575  GAGCAGACAAGCCCGTCAGGGCGCGTCAGCGGGTGTGGCGGGTGTGCGGGCTGGCTTAA
    516
Vect.  8396  CTATGCGGCATCAGAGCAGATTGTACTGAGAGTGCACCATATGCGGTG      8443
      ||||||||||||||||||||||||||||||||||||||||||||
seq05  515  CTATGCGGCATCAGAGCAGATTGTACTGAGAGTGCACCATATGCGCTG      468

```

### Blast comparison of Seq06 with the pGTOLxf gene trap vector :

Score = 605 bits (670), Expect = 2e-176 Identities = 349/355 (98%),  
Gaps = 5/355 (1%) Strand=Plus/Minus

```

Vect.  1535  CCAGGTCCCGAAAACCAAAGAAGAAGAACGCAGATCGCA--TCGATAACTTCGTATAGCA
    1592
      ||||||||||||||||||||||||||||||||||||||||
Seq06  356  CCAGGTCCCGAAAACCAAAGAAGAAGAACGCAGATCGCAGATCGATAACTTCGTATAGCA
    297
Vect.  1593  TACATTATACGAAGTTATCGCAGATCTGGACTCTAGAGGATCCCGTCGTTTTACAACGTC
    1652
      ||||||||||||||||||||||||||||||||||||||||
Seq06  296  TACATTATACGAAGTTATCGCAGATCTGGACTCTAGAGGATCCCGTCGTTTTACAACGTC
    237
Vect.  1653  GTGACTGGGAAAACCCCTGGCGTTACCCAACTTAATCGCCTTGCAGCACATCCCCCTTTTCG
    1712
      ||||||||||||||||||||||||||||||||||||||||
Seq06  236  GTGACTGGGAAAACCCCTGGCGTTACCCAACTTAATCGCCTTGCAGCACATCCCCCTTTTCG
    177
Vect.  1713  CCAGCTGGCGTAATAGCGAAGAGGCCCGCACCGATCGCCCTTCCCAACAGTTGCGCAGCC
    1772
      ||||||||||||||||||||||||||||||||||||||||
Seq06  176  CCAGCTGGCGTAATAGCGAAGAGGCCCGCACCGATCGCCCTTCCCAACAGTTGCGCAGCC
    117
Vect.  1773  TGAATGGCGAATGGCGCTTTGCCTGGTTTCCGGCACCAGAAGCGGTGCCGGAAAGCTGGC
    1832
      ||||||||||||||||||||||||||||||||||||||||
Seq06  116  TGAATGGCGAATGGCGCTTTGCCTGGTTTCCGGCACCAGAAGCGGTGCCGGAAAGCTGGC
    57
Vect.  1833  TGGAGTGCGATCTTCCTGAGGCCGATACTGTCGTCGTCCCCTCAAACCTGGCAGAT      1887
      ||||||||||||||||||||||||||||
Seq06  56  TGGAGTGCGATCTTCCTGAGGCCGATACTGTCGTC--TCCCTCAAACCT-GCAGAT      5

```

Score = 280 bits (310), Expect = 9e-79 Identities = 155/155 (100%), Gaps = 0/155 (0%) Strand=Plus/Plus

```

Vect.  8486  GCGCCATTGCGCATTCAGGCTGCGCAACTGTTGGGAAGGGCGATCGGTGCGGGCCTCTTC
    8545
      ||||||||||||||||||||||||||||||||||||||||

```

## Supplementary information for Trap THOP1 knockout generation

```

Seq06 100 GCGCCATTCGCCATTCAGGCTGCGCAACTGTTGGGAAGGGCGATCGGTGCGGGCCTCTTC
159

Vect. 8546 GCTATTACGCCAGCTGGCGAAAGGGGGATGTGCTGCAAGGCGATTAAGTTGGGTAACGCC
860
      ||||||||||||||||||||||||||||||||||||||||||||||||||||||||
Seq06 160 GCTATTACGCCAGCTGGCGAAAGGGGGATGTGCTGCAAGGCGATTAAGTTGGGTAACGCC
219

Vect. 8606 AGGGTTTTCCCAGTCACGACGTTGTAAAACGACGG 8640
      ||||||||||||||||||||||||||||||||||
Seq06 220 AGGGTTTTCCCAGTCACGACGTTGTAAAACGACGG 254

```

### Additional information 3, continuation:

#### Blast comparison of Seq05 with the THOP1 exon 5 to 6 gDNA region (gWT):

Score = 825 bits (914), Expect = 0.0 Identities = 466/469 (99%),  
Gaps = 2/469 (0%) Strand=Plus/Plus

```

gWT 73 ACCTTCCTGCCCTTCACAAGAGAGGAGCTGGGTGAGTACACGGAATGATGTTTCGCACAGC
132
      |||||||||||||||| ||| ||| |||||||||||||||||||||||||||||
Seq05 6 ACCTTCCTGCCCTTC-CAAGCGAG-AGCTGGGTGAGTACACGGAATGATGTTTCGCACAGC
63

gWT 133 TCCAAGGACACTGCAGACAGAGCTGGGCTCTGCTGACCCAGATCCCTGAGCTGGGGCAG
192
      |||||||||||||||||||||||||||||||||||||||||||||||||||||
Seq05 64 TCCAAGGACACTGCAGACAGAGCTGGGCTCTGCTGACCCAGATCCCTGAGCTGGGGCAG
123

gWT 193 CCGTGTTGTCCTTGCCGTTTTCTGTGAGCAAGTGTCTGGGGCCACAGGCACCCAGCCACA
252
      |||||||||||||||||||||||||||||||||||||||||||||||||||||
Seq05 124 CCGTGTTGTCCTTGCCGTTTTCTGTGAGCAAGTGTCTGGGGCCACAGGCACCCAGCCACA
183

gWT 253 CTGTGGGGTTTAGTTTAGGAGTAGGGGTGGTGAGTCTCAGCCCGGAGTCGGGACCTTGGA
312
      |||||||||||||||||||||||||||||||||||||||||||||||||||||
Seq05 184 CTGTGGGGTTTAGTTTAGGAGTAGGGGTGGTGAGTCTCAGCCCGGAGTCGGGACCTTGGA
243

gWT 313 GCATCAGCACGGCTGTGTGCTGTGTGGGCCTTCGCTCTATGGCTGTGGTACCTTCACTCT
372
      |||||||||||||||||||||||||||||||||||||||||||||||||||||
Seq05 244 GCATCAGCACGGCTGTGTGCTGTGTGGGCCTTCGCTCTATGGCTGTGGTACCTTCACTCT
303

gWT 373 CTGGTCTGAGGCCCCAGCATCTCTGGCGAGGCCCATTCCTGCTCAGCACTCATCCTCAC
432
      |||||||||||||||||||||||||||||||||||||||||||||||||||||
Seq05 304 CTGGTCTGAGGCCCCAGCATCTCTGGCGAGGCCCATTCCTGCTCAGCACTCATCCTCAC
363

gWT 433 TTGCTGACTGGGGATATCCTGCCAAGGTCACCTACAGCCCTGGGAGGTTCCCTTCAGGTT
492

```



### Supplementary information for Trap THOP1 knockout generation

|       |     |                                                              |     |
|-------|-----|--------------------------------------------------------------|-----|
| Seq05 | 364 | TTGCTGACTGGGGATATCCTGCCAAGGTCACCTACAGCCCTGGGAGGTTCCCTTCAGGTT |     |
| 423   |     |                                                              |     |
| gWT   | 493 | CCAAGCTCAGAGCTGCTGGCCTGACTTCAAGGCTCCGGGCTGAGCAGCG            | 541 |
|       |     |                                                              |     |
| Seq05 | 424 | CCAAGCTCAGAGCTGCTGGCCTGACTTCAAGGCTCCGGGCTGAGCAGCG            | 472 |

The expected sequence for and THOP1-Beta-Geo transgenic gDNA (gCSG1) based on the sequencing results and *in silico* informaiton:

[illegible]

**Legend:**

**blue letters** - 3'end of THOP1 exon 5 (in bold) and initial intron 5 sequence,

**highlighted in green** - the sequence of forward primer pGSG163Kof1

**In bold and red letters** - pGT0Lxf vector sequences in the antisense orientation that resulted from a non documented recombination event,

**yellow highlighted red letters** - the sequence that gDNA genotyping reverse primer CSGkoR2 anneals,

**In green letters** - gene Trap vector sequence corresponding to the end of the intronic region, splice acceptor, the initial exon 2 nucleotides of the mouse engrailed 2 gene,

In black letters - pT0Lx vector sequences, were: underlined is a Lox site, in bold is the initial coding sequence of Beta-Geo,

Highlighted in light blue - the sequence that reverse primer pGTLxR1 anneals,

Highlighted in dark blue - the sequence that reverse primer pGTLxR2 anneals.

## Supplementary information for Trap THOP1 knockout generation

### Additional information 4: Sequence analysis of the PCR DNA fragments obtained from mice CSG163 strain genomic Tail DNA genotyping.

Sequencing results for the wild type Fragment obtained with primers pCSG163KOf1 and pCSG163WTr1 (figure 4).

#### Seq07: gDNA wild type Fragment obtained with primers pCSG163KOf1 and pCSG163WTr1 sequenced with pCSG163KOf1 (E04\_ba092-gw-f1\_001.seq)

5'AAGGCCACCCCTTCTGCCCTTCAATGAGAGGAGCTGGGTGTGTACACGGAATGATGTTTCGCACTGCTCC  
CAAGGACACTGCAGACAGAGCTGGGCTCTGCTGACCCAGATCCCTGAGCTGGGGCAGCCGTGTTGTCCTTGC  
CGTTTTCTGTGAGCAAGTGTCTGGGGCCACAGGCACCCAGCCACACTGTGGGGTTTAGTTTAGGAGTAGGGG  
TGGTGAGTCTCAGCCCGAGTCGGGACCTTGGAGCATCAGCACGGCTGTGTGCTGTGTGGGCCTTCGCTCTA  
TGGCTGTGGTACCTTCACTCTCTGGTCTGAGGCCCCAGCATCTCTGGCGAGGCCCATTCCTGCTCAGCACT  
CATCCTCACTTGCTGACTGGGGATATCCTGCCAAGGTCACCTACAGCCCTGGGAGGTTCCCTTCAGGTTCCA  
AGCTCAGAGCTGCTGGCCTGACTTCAAGGCTCCGGGCTGAGCAGCGTCCGCTGCATCCACAGGTGGGCTCCC  
GGAGGACTTTCTGAGCTCTCTGGAAAAAAGGCA 3'

#### Seq08: gDNA wild type Fragment obtained with primers pCSG163KOf1 and pCSG163WTr1 sequenced with pCSG163WTr1 (F04\_ba092-gw-r1\_002.seq)

5'TAGTTGAAGCCTTGCCACCCGTAACGCAGGGGGCGGGGTGCGCCCCGAAATGATGGTACGCAACTCCCA  
AGGACACTGCAAACTGGCTGGACTCTGCAGACCTGTATGCGAGATCTGGGGGATATCCGTTGTCTTGGTG  
AGGATGAGTGCAAGTGTCTGGGGCCACCTGCACCCAGATGCTCTGTGCGGTTAAGTTTAAGAGTAGGTACTG  
GTGAGTTTCAGCCAAGGCTCACACCCTTGCAGCATCAGCTCAGCTGTGTGGTGTGTGCTCCTTCCTTCTACT  
GATGACCTACCCTCATAATCTGGTCTGAGGCCGTGGCTGGGTGCCTGGGCCCATTCCACTTGATCACTCAAA  
ACTCACTTGCTGACTGGGCATATCCTGCCAAGGTCACCTACTCACCTGAGACGATCTCTTTATGTTCCGAGC  
TTAGAAGTGCTGCCAAGATTTTTACGCTTCCTGCTGAGCATCCTCTCTTGCATCCACAGGTGGGCTCCCGGA  
GGACTTTCTGTTCTTGTGAAAAAAGGCA 3'

#### Blast comparison of Seq07 with Seq08:

Score = 289 bits (320), Expect = 2e-82 Identities = 366/492 (74%),  
Gaps = 11/492 (2%) Strand=Plus/Plus

|       |     |                                                              |
|-------|-----|--------------------------------------------------------------|
| Seq07 | 48  | CGGAATGATGTT-CGCACTGCTCCCAAGGACACTGCAGACAGAGCTGGGCTCTGCTGACC |
| 106   |     |                                                              |
| Seq08 | 47  | CGAAATGATGGTACGCAA--CTCCCAAGGACACTGCAAACTGGCTGGACTCTGCAGACC  |
| 104   |     |                                                              |
| Seq07 | 107 | CAGATCCCTGAGCTGGGGCAGCCGTGTTGTCCTTGCCGTTTTCTGTGAGCAAGTGTCTGG |
| 166   |     |                                                              |
| Seq08 | 105 | TGTATGCGAGATCTGGGGGATATCCGTTGTCCTTGGTGAGGA-TGAGTGCAAGTGTCTGG |
| 163   |     |                                                              |
| Seq07 | 167 | GGCCACAGGCACCCAGCCACACTGTGGGGTTTAGTTTAGGAGTAGGGG-TGGTGAGTCTC |
| 225   |     |                                                              |
| Seq08 | 164 | GGCCACCTGCACCCAGATGCTCTGTGCGGTTAAGTTTAAGAGTAGGTACTGGTGAGTTTC |
| 223   |     |                                                              |
| Seq07 | 226 | AGCCCGGAGTCGGGACCTTGGAGCATCAGCACGGCTGTGTGCTGTGTGGGCCTTCGCTCT |
| 285   |     |                                                              |
| Seq08 | 224 | AGCCAAGGCTCACACCCTTGCAGCATCAGCTCAGCTGTGTGGTGTGTGCTCCTTCCTTCT |
| 283   |     |                                                              |
| Seq07 | 286 | ATGGCTGTGGTACCTTCACTCTCTGGTCTGAGGCCCCAGCATCTCTGGCGAGGCCCATTC |
| 345   |     |                                                              |

### Supplementary information for Trap THOP1 knockout generation

|              |     |                                                              |     |
|--------------|-----|--------------------------------------------------------------|-----|
| Seq08<br>342 | 284 | ACTGATGACCTACCCTCATAATCTGGTCTGAGGCCGTGGC-TGGGTGCCTGGGCCCATTC |     |
| Seq07<br>403 | 346 | C-CTGCTCAGCACTCATC-CTCACTTGCTGACTGGGGATATCCTGCCAAGGTCACCTACA |     |
| Seq08<br>400 | 343 | CACT--TGATCACTCAAACTCACTTGCTGACTGGGCATATCCTGCCAAGGTCACCTACT  |     |
| Seq07<br>463 | 404 | GCCCTGGGAGGTTCCCTTCAGGTTCCAAGCTCAGAGCTGCTGGCCTGACTTCAAGGCTCC |     |
| Seq08<br>460 | 401 | CACCTGAGACGATCTCTTTATGTTCCGAGCTTAGAAGTGCTGCCAAGATTTTTACGCTTC |     |
| Seq07<br>523 | 464 | GGGCTGAGCAGCGTCCGCTGCATCCACAGGTGGGCTCCCGGAGGACTTTCTGAGCTCTCT |     |
| Seq08<br>519 | 461 | CTGCTGAGCATCCTCTCTTGCATCCACAGGTGGGCTCCCGGAGGACTTTCTGTTCT-TGT |     |
| Seq07        | 524 | GGAAAAAAGGCA                                                 | 535 |
| Seq08        | 520 | TGAAAAAAGGCA                                                 | 531 |

Blast comparison of Seq07 with the THOP1 exon 5 to 6 qDNA region (qWT):

Score = 913 bits (1012), Expect = 0.0 Identities = 516/521 (99%), Gaps = 1/521 (0%) Strand=Plus/Plus

|       |     |                                                               |
|-------|-----|---------------------------------------------------------------|
| gWT   | 34  | CCTTCCTGCCCTTCACAAGAGAGGAGCTGGGTGAGTACACGGAATGATGTTTCGCACAGCT |
| Seq07 | 10  | CCTTCCTGCCCTTCA-ATGAGAGGAGCTGGGTGTGTACACGGAATGATGTTTCGCACTGCT |
| gWT   | 94  | CCCAAGGACACTGCAGACAGAGCTGGGCTCTGCTGACCCAGATCCCTGAGCTGGGGCAGC  |
| Seq07 | 69  | CCCAAGGACACTGCAGACAGAGCTGGGCTCTGCTGACCCAGATCCCTGAGCTGGGGCAGC  |
| gWT   | 154 | CGTGTTGTCCTTGCCGTTTTCTGTGAGCAAGTGTCTGGGGCCACAGGCACCCAGCCACAC  |
| Seq07 | 129 | CGTGTTGTCCTTGCCGTTTTCTGTGAGCAAGTGTCTGGGGCCACAGGCACCCAGCCACAC  |
| gWT   | 214 | TGTGGGGTTTtagTTTAGGAGTAGGGGTGGTGAGTCTCAGCCCGGAGTCGGGACCTTGGAG |
| Seq07 | 189 | TGTGGGGTTTtagTTTAGGAGTAGGGGTGGTGAGTCTCAGCCCGGAGTCGGGACCTTGGAG |
| gWT   | 274 | CATCAGCACGGCTGTGTGCTGTGTGGGCCTTCGCTCTATGGCTGTGGTACCTTCACTCTC  |
| Seq07 | 249 | CATCAGCACGGCTGTGTGCTGTGTGGGCCTTCGCTCTATGGCTGTGGTACCTTCACTCTC  |

## Supplementary information for Trap THOP1 knockout generation

308

gWT 334 TGGTCTGAGGCCCCAGCATCTCTGGCGAGGCCCATTCCTGCTCAGCACTCATCCTCACT  
393

Seq07 309 TGGTCTGAGGCCCCAGCATCTCTGGCGAGGCCCATTCCTGCTCAGCACTCATCCTCACT  
368

gWT 394 TGCTGACTGGGGATATCCTGCCAAGGTCACCTACAGCCCTGGGAGGTTCCCTTCAGGTTC  
453

Seq07 369 TGCTGACTGGGGATATCCTGCCAAGGTCACCTACAGCCCTGGGAGGTTCCCTTCAGGTTC  
428

gWT 454 CAAGCTCAGAGCTGCTGGCCTGACTTCAAGGCTCCGGGCTGAGCAGCGTCCGCTGCATCC  
513

Seq07 429 CAAGCTCAGAGCTGCTGGCCTGACTTCAAGGCTCCGGGCTGAGCAGCGTCCGCTGCATCC  
488

gWT 514 ACAGGTGGGCTCCCGGAGGACTTTCTGAGCTCTCTGGAGAA 554  
|||||

Seq07 489 ACAGGTGGGCTCCCGGAGGACTTTCTGAGCTCTCTGGAAAA 529

### Additional information 4, continuation:

### Blast comparison of Seq08 with the THOP1 exon 5 to 6 gDNA region (gWT):

Score = 280 bits (310), Expect = 8e-80 Identities = 350/471 (74%),  
Gaps = 8/471 (1%) Strand=Plus/Plus

gWT 73 CGGAATGATGTTTCGCACAGCTCCCAAGGACACTGCAGACAGAGCTGGGCTCTGCTGACCC  
132

Seq08 47 CGAAATGATGGTA-CGCAACTCCCAAGGACACTGCAAACTGGCTGGACTCTGCAGACCT  
105

gWT 133 AGATCCCTGAGCTGGGGCAGCCGTGTTGTCCTTGCCGTTTTCTGTGAGCAAGTGTCTGGG  
192

Seq08 106 GTATGCGAGATCTGGGGGATATCCGTTGTCCTTGGTGAGGA-TGAGTGCAAGTGTCTGGG  
164

gWT 193 GCCACAGGCACCCAGCCACACTGTGGGGTTTAGTTTAGGAGTAGGGG-TGGTGAGTCTCA  
251

Seq08 165 GCCACCTGCACCCAGATGCTCTGTGCGGTTAAGTTTAAGAGTAGGTACTGGTGAGTTTCA  
224

gWT 252 GCCCGGAGTCGGGACCTTGGAGCATCAGCACGGCTGTGTGCTGTGTGGGCCTTCGCTCTA  
311

Seq08 225 GCCAAGGCTCACACCCTTGCAGCATCAGCTCAGCTGTGTGGTGTGTGCTCCTTCCTTCTA  
284

gWT 312 TGGCTGTGGTACCTTCACTCTCTGGTCTGAGGCCCCAGCATCTCTGGCGAGGCCCATTC  
371

Seq08 285 CTGATGACCTACCCTCATAATCTGGTCTGAGGCCGTGGC-TGGGTGCCTGGGCCCATTC  
343

### Supplementary information for Trap THOP1 knockout generation

|       |     |                                                              |
|-------|-----|--------------------------------------------------------------|
| gWT   | 372 | -CTGCTCAGCACTCATC-CTCACTTGCTGACTGGGGATATCCTGCCAAGGTACCTACAG  |
| 429   |     |                                                              |
|       |     |                                                              |
| Seq08 | 344 | ACT--TGATCACTCAAAC TCACTTGCTGACTGGGCATATCCTGCCAAGGTACCTACTC  |
| 401   |     |                                                              |
| gWT   | 430 | CCCTGGGAGGTTCCCTTCAGGTTCCAAGCTCAGAGCTGCTGGCCTGACTTCAAGGCTCCG |
| 489   |     |                                                              |
|       |     |                                                              |
| Seq08 | 402 | ACCTGAGACGATCTCTTTATGTTCCGAGCTTAGAAGTGCTGCCAAGATTTTTACGCTTCC |
| 461   |     |                                                              |
| gWT   | 490 | GGCTGAGCAGCGTCCGCTGCATCCACAGGTGGGCTCCCGGAGGACTTTCTG      540 |
|       |     |                                                              |
| Seq08 | 462 | TGCTGAGCATCCTCTCTTGCATCCACAGGTGGGCTCCCGGAGGACTTTCTG      512 |

Analysis of the transgenic DNA Fragment obtained with primers pCSG163KOf1 and CSG163R2 from genotyping

Sequencing results for the transgenic DNA Fragment (gCSGk) obtained by genotyping PCR with primers: pCSG163Kof1 x CSG163R2 (Figure 4).

Seq09 Fragment qCSGk sequenced with pCSG163Kof1 (G04 ba092-qk-f1 003.seq)

seqs = fragments.gsub('sequenced with forward primer', 'g11\_00010047/5')  
5' AAGGACTCCCTTGTCTGCCTTTGACAAGGAAGGCGCTGGGTGCGTTCACGGAATGATGTTTCGACAGCTCT  
CCAAGGACACTGCAGACAGAGCTGGGACTCTGCTGACCCAGATCCCTGAGCTGGGGCAGCCGTGTTGTCTCTTG  
CCGTTTTCTGTGAGCAAGTGTCTGGGGCCACAGGCACCCAGCCACACTGTGGGGTTTAGTTTAGGAGTAGGG  
GTGGTGAGTCTCAGCCCGAGTTCGGGACCTTGAGCATCAGCACGGCTGTGTGCTGTGTGGGCCTTCGCTCT  
ATGGCTGTGGTACCTTCACTCTCTGGTCTGAGGCCCCAGCATCTCTGGCGAGGCCCATTCCCTGCTCAGCAC  
TCATCCTCACTTGCTGACTGGGGATATCCTGCCAAGGTCACCTACAGCCCTGGGAGGTTCCCTTCAGGTTCC  
AAGCTCAGAGCTGCTGGCCTGACTTCAAGGCTCCGGGCTGAGCAGCG 3'

Seq10 Fragment gCSGk sequenced with CSGKOR2 (H04 ba092-gk-r2 004.seq)

5'CTGCGATGCTGGTGCATGCTGCCATTGTGTAACGACTCGGGAGGTGTCTGCTGCTGGGGCCGGCTTAAC  
AATGCCTATTCTATGAAATTGCACTGAGTGTGCACCATATGCACTGCGTATCCCGGAGCCTTGAAGTGGGGC  
CTTTGTCTCTGAGCTTGGAACCTGAAGGGAACCTAACAGGGCTGTAGGTGACCTTGGCCAGATATCCCCAGT  
CATGAAGTGAGGATCAGTGCTTTGCAGGGAATGGGACTAATTATACATGCTGGCCCCCTATACCGAAGAGTG  
AAGGTACCACACTCCTCTATAAGAAGGCCACACTGTGGACAGATGTGCTGTTGCTTCAAGGTCTTAACTT  
GAGCTTTGCTCACCACCATAACTCCTAAACTAAACCCACAGTGTGGCTGGTTGCCTGTGGCCCCACACACT  
TGCTCACAGAAAACATGCTGGACAACACCGCTGCCCCAGCTTAAGGTTCTGGGTCAACAAACCCAGCTCTT  
TCTGGTGTGTCCTTGGGAGCTGTGCTAACATCATTCCGTGTACTACCCAGCTCCTCTCTTGTGAAGGGCAC  
CATGGTGGTGTCAACAAAATTGTTCTTGTTTAACATCTTAAAGTCAGGCATGGTGATTCCCCAGAGGTTCT  
TGTTGAAGTCAAAAT 3'

Blast comparison of Seq01 with the THOP1 exon 5 to 6 gDNA region (gWT):

Score = 794 bits (880), Expect = 0.0 Identities = 458/466 (98%), Gaps = 3/466 (0%) Strand=Plus/Plus

|       |    |                                                               |
|-------|----|---------------------------------------------------------------|
| gWT   | 37 | TCCTGCCCTTCACAAG-AGAGGAGCTGGGTGAGTACACGGAATGATGTTTCGCACAGCTCC |
| 95    |    |                                                               |
|       |    |                                                               |
| Seq09 | 14 | TCCTGCCTTT-ACAAGGAAAGGCGCTGGGTGCGTTCACGGAATGATGTTTCG-ACAGCTCC |
| 71    |    |                                                               |

# Supplementary information for Trap THOP1 knockout generation

|       |     |                                                              |     |
|-------|-----|--------------------------------------------------------------|-----|
| gWT   | 96  | CAAGGACACTGCAGACAGAGCTGGGCTCTGCTGACCCAGATCCCTGAGCTGGGGCAGCCG |     |
| 155   |     |                                                              |     |
| Seq09 | 72  | CAAGGACACTGCAGACAGAGCTGGGCTCTGCTGACCCAGATCCCTGAGCTGGGGCAGCCG |     |
| 131   |     |                                                              |     |
| gWT   | 156 | TGTTGTCCTTGCCGTTTTCTGTGAGCAAGTGTCTGGGGCCACAGGCACCCAGCCACACTG |     |
| 215   |     |                                                              |     |
| Seq09 | 132 | TGTTGTCCTTGCCGTTTTCTGTGAGCAAGTGTCTGGGGCCACAGGCACCCAGCCACACTG |     |
| 191   |     |                                                              |     |
| gWT   | 216 | TGGGGTTTAGTTTAGGAGTAGGGGTGGTGAGTCTCAGCCCGGAGTCGGGACCTTGGAGCA |     |
| 275   |     |                                                              |     |
| Seq09 | 192 | TGGGGTTTAGTTTAGGAGTAGGGGTGGTGAGTCTCAGCCCGGAGTCGGGACCTTGGAGCA |     |
| 251   |     |                                                              |     |
| gWT   | 276 | TCAGCACGGCTGTGTGCTGTGTGGGCCTTCGCTCTATGGCTGTGGTACCTTCACTCTCTG |     |
| 335   |     |                                                              |     |
| Seq09 | 252 | TCAGCACGGCTGTGTGCTGTGTGGGCCTTCGCTCTATGGCTGTGGTACCTTCACTCTCTG |     |
| 311   |     |                                                              |     |
| gWT   | 336 | GTCTGAGGCCCCAGCATCTCTGGCGAGGCCCATTCCTGCTCAGCACTCATCCTCACTTG  |     |
| 395   |     |                                                              |     |
| Seq09 | 312 | GTCTGAGGCCCCAGCATCTCTGGCGAGGCCCATTCCTGCTCAGCACTCATCCTCACTTG  |     |
| 371   |     |                                                              |     |
| gWT   | 396 | CTGACTGGGGATATCCTGCCAAGGTCACCTACAGCCCTGGGAGGTTCCCTTCAGGTTCCA |     |
| 455   |     |                                                              |     |
| Seq09 | 372 | CTGACTGGGGATATCCTGCCAAGGTCACCTACAGCCCTGGGAGGTTCCCTTCAGGTTCCA |     |
| 431   |     |                                                              |     |
| gWT   | 456 | AGCTCAGAGCTGCTGGCCTGACTTCAAGGCTCCGGGCTGAGCAGCG               | 501 |
|       |     |                                                              |     |
| Seq09 | 432 | AGCTCAGAGCTGCTGGCCTGACTTCAAGGCTCCGGGCTGAGCAGCG               | 477 |

## Supplementary information for Trap THOP1 knockout generation

## Additional information 4, continuation:

Blast comparison of Seq09 with Seq10:

Score = 455 bits (504), Expect = 3e-132 Identities = 426/535 (79%),  
Gaps = 5/535 (0%) Strand=Plus/Minus

[illegible]

## Supplementary information for Trap THOP1 knockout generation

### Blast comparison of Seq09 with the pGTOLxf gene trap vector:

Score = 237 bits (262), Expect = 2e-65 Identities = 133/134 (99%),  
Gaps = 0/134 (0%) Strand=Plus/Minus

```

vect. 8310 ACAGCTTGTCTGTAAGCGGATGCCGGGAGCAGACAAGCCCGTCAGGGCGCGTCAGCGGGT
      8369
      ||||||||||||||||||||||||||||||||||||||||||||||||||||||||||
Seq09 606 ACAGCTTGTCTGTAAGCGGATGCCGGGAGCAGACAAGCCCGTCAGGGCGCGTCAGCGGGT
      547
vect. 8370 GTTGGCGGGTGTCTGGGGCTGGCTTAACTATGCGGCATCAGAGCAGATTGTACTGAGAGTG
      8429
      ||||||||||||||||||||||||||||||||||||||||||||||||||||||||||
Seq09 546 GTTGGCGGGTGTCTGGGGCTGGCTTAACTATGCGGCATCAGAGCAGATTGTACTGAGAGTG
      487
vect. 8430 CACCATATGCGGTG 8443
      ||||||||||||
Seq09 486 CACCATATGCGCTG 473

```

### Blast comparison of Seq10 with the pGTOLxf gene trap vector:

Score = 605 bits (670), Expect = 2e-176 Identities = 349/355 (98%),  
Gaps = 5/355 (1%) Strand=Plus/Minus

```

Vect. 1535 CCAGGTCCCGAAAACCAAAGAAGAAGAACGCAGATCGCA--TCGATAACTTCGTATAGCA
      1592
      ||||||||||||||||||||||||||||||||||||||||| ||||||||||||||||||
Seq10 356 CCAGGTCCCGAAAACCAAAGAAGAAGAACGCAGATCGCAGATCGATAACTTCGTATAGCA
      297
Vect. 1593 TACATTATACGAAGTTATCGCAGATCTGGACTCTAGAGGATCCCGTCGTTTTACAACGTC
      1652
      ||||||||||||||||||||||||||||||||||||||||| ||||||||||||||||||
Seq10 296 TACATTATACGAAGTTATCGCAGATCTGGACTCTAGAGGATCCCGTCGTTTTACAACGTC
      237
Vect. 1653 GTGACTGGGAAAACCCTGGCGTTACCCAACTTAATCGCCTTGCAGCACATCCCCCTTTTCG
      1712
      ||||||||||||||||||||||||||||||||||||||||| ||||||||||||||||||
Seq10 236 GTGACTGGGAAAACCCTGGCGTTACCCAACTTAATCGCCTTGCAGCACATCCCCCTTTTCG
      177
Vect. 1713 CCAGCTGGCGTAATAGCGAAGAGGCCCGCACCGATCGCCCTTCCCAACAGTTGCGCAGCC
      1772
      ||||||||||||||||||||||||||||||||||||||||| ||||||||||||||||||
Seq10 176 CCAGCTGGCGTAATAGCGAAGAGGCCCGCACCGATCGCCCTTCCCAACAGTTGCGCAGCC
      117
Vect. 1773 TGAATGGCGAATGGCGCTTTGCCTGGTTTCCGGCACCAGAAGCGGTGCCGGAAAGCTGGC
      1832
      ||||||||||||||||||||||||||||||||||||||||| ||||||||||||||||||
Seq10 116 TGAATGGCGAATGGCGCTTTGCCTGGTTTCCGGCACCAGAAGCGGTGCCGGAAAGCTGGC
      57
Vect. 1833 TGGAGTGCGATCTTCCTGAGGCCGATACTGTCGTCGTCCCCTCAAACCTGGCAGAT 1887
      ||||||||||||||||||||||||||||||||||||| ||||||||||||
Seq10 56 TGGAGTGCGATCTTCCTGAGGCCGATACTGTCGTC--TCCCTCAAACCT-GCAGAT 5

```



## Supplementary information for Trap THOP1 knockout generation

Score = 280 bits (310), Expect = 9e-79 Identities = 155/155 (100%),  
Gaps = 0/155 (0%) Strand=Plus/Plus

Vect. 8486 GCGCCATTCGCCATTCAGGCTGCGCAACTGTTGGGAAGGGCGATCGGTGCGGGCCTCTTC  
8545

Seq10 100 GCGCCATTCGCCATTCAGGCTGCGCAACTGTTGGGAAGGGCGATCGGTGCGGGCCTCTTC  
159

Vect. 8546 GCTATTACGCCAGCTGGCGAAAGGGGGATGTGCTGCAAGGCGATTAAGTTGGGTAACGCC  
8605

Seq10 160 GCTATTACGCCAGCTGGCGAAAGGGGGATGTGCTGCAAGGCGATTAAGTTGGGTAACGCC  
219

Vect. 8606 AGGGTTTTCCCAGTCACGACGTTGTAAAACGACGG 8640

Seq10 220 AGGGTTTTCCCAGTCACGACGTTGTAAAACGACGG 254
