# Supplementary material for: Thimet Oligopeptidase (EC 3.4.24.15) Key Functions Suggested by Knockout Mice Phenotype Characterization
Source: MDPI journal article supplement (doi:10.3390/biom9080382), 2019-08-19
Supplement: s1 [file s1]

**Thimet oligopeptidase (EC 3.4.24.15) key functions suggested by knockout mice phenotype characterization**

Dos Santos, N.B.<sup>1#</sup>, Franco, R.D.<sup>1#</sup>, Camarini, R.<sup>1</sup>, Munhoz, C.D.<sup>1</sup>, Eichler, R.A.S.<sup>1</sup>, Gewehr, M.C.F.<sup>1</sup>, Reckziegel, P.<sup>1</sup>, Llanos, R.P.<sup>1</sup>, Dale, C.S.<sup>2</sup>, Oliveira, V.R.<sup>2</sup>, Borges, V.F.<sup>3</sup>, Lima, B.H.F.<sup>3</sup>, Cunha, F.Q.<sup>3</sup>, Visniauskas, B.<sup>4</sup>, Chagas, J.R.<sup>4</sup>, Tufik, S.<sup>4</sup>, Peres, F.F.<sup>5</sup>, Abilio, V.C.<sup>5</sup>, Florio, J.C.<sup>6</sup>, Iwai, L.K.<sup>7</sup>, Rioli, V.<sup>7</sup>, Prezoto, B.C.<sup>8</sup>, Guimaraes, A.O.<sup>9</sup>, Pesquero, J.B.<sup>9</sup>, Bader, M.<sup>10,11,12,13,14</sup>, Castro, L.M.<sup>15</sup>, and Ferro, E.S.<sup>1\*</sup>

Department of <sup>1</sup>Pharmacology and <sup>2</sup>Anatomy, Biomedical Sciences Institute, and <sup>6</sup>Department of Pathology, Veterinarian Medical School, University of São Paulo (USP), São Paulo, 05508-000; <sup>3</sup>Department of Pharmacology, Faculty of Medicine of Ribeirao Preto, University of São Paulo, Ribeirão Preto, SP, 14049-900; Departments of <sup>4</sup>Psychobiology, <sup>5</sup>Pharmacology and <sup>9</sup>Biophysics, Federal University of São Paulo (UNIFESP), São Paulo, 04023-062; <sup>7</sup>Special Laboratory of Applied Toxinology (LETA), Center of Toxins, Immune Response and Cell Signaling (CETICS), <sup>8</sup>Pharmacology Department, Butantan Institute, 05503-000, São Paulo; <sup>10</sup>Max-Delbrück-Center for Molecular Medicine, D-13125, Berlin, Germany, <sup>11</sup>Charité - Universitätsmedizin Berlin, <sup>12</sup>Berlin Institute of Health (BIH), Berlin, Germany, <sup>13</sup>DZHK (German Center for Cardiovascular Research), Partner Site Berlin, Berlin, Germany, <sup>14</sup>Institute for Biology, University of Lübeck, Lübeck, Germany, <sup>15</sup>Biosciences Institute, São Paulo State University (UNESP), São Vicente, 11330-900; SP, Brazil.

**Running Title:** THOP1 knockout mice

**\*To whom correspondence should be addressed:** Emer S. Ferro, PhD, Professor, Av. Prof. Lineu Prestes 1524, Sala 317, São Paulo, SP, 05508-000, Brazil, Phone: +55-11-3091-7310, Fax: +55-11-3091-7322, e-mail: [eferro@usp.br](mailto:eferro@usp.br)

**#These two authors contributed equally**

**Keywords:** THOP1; neurodegeneration; inflammation; sepsis; MHC-I; peptidome.

Peptides individual MS identification and quantitation  
Pre frontal cortex

| Protein name                                          | Peptide sequence                    | Elution time Run1 | Elution time Run2 | Elution time Run 3 | m/z Light | m/z Heavy | Z | diff | T   | m/z 1 | m/z 2     | average m/z | SD         | Observed mass | Theoretical mass | ppm        | Peptide sequence | Ratio K01/W11                | Ratio K02/W12 | RATIO K03/W13 | Average ratio | SE   | n    |       |   |
|-------------------------------------------------------|-------------------------------------|-------------------|-------------------|--------------------|-----------|-----------|---|------|-----|-------|-----------|-------------|------------|---------------|------------------|------------|------------------|------------------------------|---------------|---------------|---------------|------|------|-------|---|
| Acyl-CoA-binding protein                              | VEKVDLKKYGI                         | 34.1              | nd                | 40.5               | 845.0430  | 855.097   | 2 | 20   | 5.0 | 5     | 1547.8955 | 1548.028    | 1547.96175 | 0.03699       | 1547.9618        | 1.547.8996 | 40               | VEKVDLKKYGI                  |               | 0.40          | nd            | 0.39 | 0.40 | 0.005 | 2 |
| Acyl-CoA-binding protein                              | VEKVDLKKYGI                         | 34.1              | nd                | 40.5               | 563.6916  | 570.4003  | 3 | 20   | 5.0 | 5     | 1547.8943 | 1548.0289   | 1547.9606  | 0.03703       | 1547.9606        | 1.547.8996 | 39               | VEKVDLKKYGI                  |               | 0.50          | nd            | 0.30 | 0.40 | 0.100 | 2 |
| Acyl-CoA-binding protein                              | KQATVGDVNTDRPGLLDL                  | 50.2              | 57.0              | 55.4               | 656.6995  | 659.3848  | 3 | 8    | 2.0 | 2     | 1911.0119 | 1911.0704   | 1911.04115 | 0.04137       | 1911.0412        | 1.911.0134 | 15               | KQATVGDVNTDRPGLLDL           |               | 0.66          | 0.46          | 0.25 | 0.46 | 0.118 | 3 |
| Acyl-CoA-binding protein                              | TVGDVNTDRPGLLDL                     | 59.6              | 63.5              | 62.1               | 806.9342  | 808.9464  | 2 | 4    | 1.0 | 1     | 1583.8211 | 1583.8468   | 1583.83395 | 0.01817       | 1583.8228        | 1.583.8228 | 7                | TVGDVNTDRPGLLDL              |               | 0.98          | 0.62          | 0.32 | 0.64 | 0.191 | 3 |
| Cerebellin-4                                          | AANSKVAFSAVRSTN                     | 25.7              | 33.1              | 31.9               | 789.9358  | 793.9625  | 2 | 8    | 2.0 | 2     | 1521.7933 | 1521.849    | 1521.821   | 0.0396        | 1521.8210        | 1.521.7972 | 16               | AANSKVAFSAVRSTN              |               | 1.1           | 1.33          | 1.02 | 1.12 | 0.107 | 3 |
| Clathrin coat assembly protein AP180                  | ASKGLGSDLDSSLASL                    | 61.1              | 63.5              | 63.5               | 788.9265  | 792.9523  | 2 | 8    | 2.0 | 2     | 1519.7744 | 1519.8296   | 1519.8015  | 0.03833       | 1519.8015        | 1.519.7802 | 14               | ASKGLGSDLDSSLASL             |               | 0.75          | 0.42          | 0.42 | 0.53 | 0.110 | 3 |
| Clathrin coat assembly protein AP180                  | SKGLGSDLDSSLASL                     | 60.7              | 63.2              | 63.9               | 753.4092  | 757.4341  | 2 | 8    | 2.0 | 2     | 1448.7398 | 1448.7922   | 1448.766   | 0.03705       | 1448.7660        | 1.448.7431 | 16               | SKGLGSDLDSSLASL              |               | 0.78          | 0.38          | 0.50 | 0.55 | 0.120 | 3 |
| Clathrin coat assembly protein AP180                  | SPSPPTATQSPKKPPAKDPLADLNKDFL        | 65.2              | 69.1              | 67.3               | 643.5716  | 647.5959  | 4 | 16   | 4.0 | 4     | 2458.1292 | 2458.2316   | 3072.6568  | 0.07241       | 3072.6568        | 3.072.6568 | 0                | SPSPPTATQSPKKPPAKDPLADLNKDFL |               | 0.75          | 0.41          | 0.36 | 0.51 | 0.123 | 3 |
| Clathrin coat assembly protein AP180                  | KGLGSDLDSSLASL                      | 59.8              | 63.0              | 62.5               | 709.8629  | 713.9183  | 2 | 8    | 2.0 | 2     | 1361.7072 | 1361.7606   | 1361.7339  | 0.03776       | 1361.7339        | 1.361.7111 | 17               | KGLGSDLDSSLASL               |               | 0.83          | 0.40          | 0.44 | 0.56 | 0.137 | 3 |
| Cytochrome b-c1 complex subunit Rieske, mitochondrial | ARSGFPAPLVAT                        | 47.4              | 54.4              | 53.1               | 651.3831  | 653.3387  | 2 | 4    | 1.0 | 1     | 1272.1189 | 1272.6274   | 1272.67315 | 0.0647        | 1272.6732        | 1.272.6899 | -13              | ARSGFPAPLVAT                 |               | 0.95          | 1.05          | 0.44 | 0.81 | 0.189 | 3 |
| Cytochrome b-c1 complex subunit Rieske, mitochondrial | SGQAAARPLVATV                       | 33.0              | 40.3              | 39.5               | 634.8712  | 636.8837  | 2 | 4    | 1.0 | 1     | 1239.6951 | 1239.7214   | 1239.70825 | 0.0186        | 1239.7083        | 1.239.7008 | 6                | SGQAAARPLVATV                |               | 0.88          | 0.91          | 0.46 | 0.75 | 0.144 | 3 |
| Cytochrome b-c1 complex subunit Rieske, mitochondrial | GLNVPASVRF                          | 51.8              | 56.3              | 57.1               | 544.3185  | 546.3308  | 2 | 4    | 1.0 | 1     | 1058.5897 | 1058.6156   | 1058.60265 | 0.01831       | 1058.6027        | 1.058.5946 | 8                | GLNVPASVRF                   |               | 0.88          | 1.33          | 0.63 | 0.94 | 0.206 | 3 |
| Cytochrome b-c1 complex subunit Rieske, mitochondrial | TVGLNVPASVRF                        | 58.6              | 61.2              | 60.6               | 644.3771  | 646.3301  | 2 | 4    | 1.0 | 1     | 1258.7089 | 1258.6142   | 1258.66055 | 0.06555       | 1258.6606        | 1.258.7106 | -40              | TVGLNVPASVRF                 |               | 1.00          | 1.21          | 0.63 | 0.95 | 0.171 | 3 |
| Cytochrome b-c1 complex subunit Rieske, mitochondrial | SGQAAARPLV                          | 23.7              | 31.4              | 29.6               | 534.8123  | 536.8249  | 2 | 4    | 1.0 | 1     | 1039.5733 | 1039.6038   | 1039.59055 | 0.01874       | 1039.5906        | 1.039.5847 | 6                | SGQAAARPLV                   |               | 0.84          | 1.22          | 0.51 | 0.86 | 0.207 | 3 |
| Cytochrome c oxidase subunit 5A, mitochondrial        | NDFASAVRILEV                        | nd                | 75.0              | 72.0               | 681.3769  | 683.3907  | 2 | 4    | 1.0 | 1     | 1332.7065 | 1332.7354   | 1332.72095 | 0.02044       | 1332.7210        | 1.332.7110 | 7                | NDFASAVRILEV                 | nd            |               | 0.47          | 0.24 | 0.36 | 0.115 | 2 |
| Cytochrome c oxidase subunit 5A, mitochondrial        | RPTLNELGISTPEELGLDKV                | 64.2              | 66.0              | 65.9               | 746.4207  | 749.1039  | 3 | 8    | 2.0 | 2     | 2180.1755 | 2180.2277   | 2180.2016  | 0.03691       | 2180.2016        | 2.180.1761 | 12               | RPTLNELGISTPEELGLDKV         |               | 0.66          | 0.33          | 0.27 | 0.42 | 0.121 | 3 |
| Cytochrome c oxidase subunit 5A, mitochondrial        | GISTPEELGLDKV                       | 53.9              | 67.0              | 57.6               | 707.3982  | 711.423   | 2 | 8    | 2.0 | 2     | 1356.7178 | 1356.77     | 1356.7439  | 0.03691       | 1356.7439        | 1.356.7209 | 17               | GISTPEELGLDKV                |               | 0.54          | 0.55          | 0.38 | 0.49 | 0.055 | 3 |
| Cytochrome c oxidase subunit 6A1, mitochondrial       | HNPHVNPVPTGYEDE                     | 32.1              | 38.6              | 37.7               | 873.9091  | 875.921   | 2 | 4    | 1.0 | 1     | 1717.7709 | 1717.796    | 1717.7845  | 0.01775       | 1717.7835        | 1.717.7769 | 4                | HNPHVNPVPTGYEDE              |               | 1             | 0.97          | 0.61 | 0.86 | 0.127 | 3 |
| LM zinc-binding domain-containing Nebulette           | TOVVSDAAYKGVPHV                     | 37.8              | 44.0              | 43.4               | 618.6789  | 621.3605  | 3 | 8    | 2.0 | 2     | 1796.9441 | 1796.9975   | 1796.9708  | 0.03776       | 1796.9708        | 1.797.0492 | -44              | TOVVSDAAYKGVPHV              |               | 0.67          | 0.64          | 0.48 | 0.59 | 0.059 | 3 |
| Macrophage migration inhibitory factor                | AQATGKPAQYIAVHVVPDQL                | 54.5              | 57.4              | 56.2               | 721.4068  | 724.0897  | 3 | 8    | 2.0 | 2     | 2105.1338 | 2105.1851   | 2105.15945 | 0.03627       | 2105.1595        | 2.105.1342 | 12               | AQATGKPAQYIAVHVVPDQL         |               | 0.80          | 0.40          | 0.57 | 0.59 | 0.115 | 3 |
| Macrophage migration inhibitory factor                | AQATGKPAQYIAVHVVPDQL                | 54.5              | 57.4              | 56.2               | 1081.6061 | 1085.6301 | 2 | 8    | 2.0 | 2     | 2105.1336 | 2105.1842   | 2105.1589  | 0.03578       | 2105.1589        | 2.105.1342 | 12               | AQATGKPAQYIAVHVVPDQL         |               | 0.71          | 0.61          | 0.62 | 0.65 | 0.032 | 3 |
| Macrophage migration inhibitory factor                | AQATGKPAQYIA                        | 26.4              | 33.4              | 32.2               | 637.8604  | 641.8852  | 2 | 8    | 2.0 | 2     | 1217.6422 | 1217.6944   | 1217.6683  | 0.03691       | 1217.6683        | 1.217.6477 | 17               | AQATGKPAQYIA                 |               | 1.11          | 0.93          | 0.71 | 0.92 | 0.116 | 3 |
| Microtubule-associated protein tau                    | ADEVSAASLAKGL                       | 40.8              | 46.8              | 46.7               | 672.8729  | 676.8983  | 2 | 8    | 2.0 | 2     | 1287.6672 | 1287.7206   | 1287.6939  | 0.03776       | 1287.6939        | 1.287.6743 | 15               | ADEVSAASLAKGL                |               | 1.245         | 0.59          | 0.50 | 0.78 | 0.235 | 3 |
| Neurogranin                                           | GRKPGPGGGAGGARGGAGGGPSPGD           | 16.3              | 22.9              | 21.3               | 725.3692  | 728.0518  | 3 | 8    | 2.0 | 2     | 2117.021  | 2117.0714   | 2117.0184  | 0.03564       | 2117.0184        | 2.117.0184 | 0                | GRKPGPGGGAGGARGGAGGGPSPGD    |               | 0.79          | 0.56          | 0.45 | 0.60 | 0.100 | 3 |
| Neurogranin                                           | KGPGPGGGAGGARGGAGGGPSPGD            | 18.0              | 23.8              | 22.6               | 980.9863  | 985.0108  | 2 | 8    | 2.0 | 2     | 1903.894  | 1903.9456   | 1903.9196  | 0.03649       | 1903.9198        | 1.903.8958 | 13               | KGPGPGGGAGGARGGAGGGPSPGD     |               | 0.90          | 0.53          | 0.22 | 0.55 | 0.197 | 3 |
| Neurogranin                                           | RKPGPGPGGGAGGARGGAGGGPSPGD          | 16.2              | 22.9              | 21.2               | 706.3615  | 709.0445  | 3 | 8    | 2.0 | 2     | 2059.9979 | 2060.0495   | 2060.0237  | 0.03649       | 2060.0237        | 2.059.9969 | 13               | RKPGPGPGGGAGGARGGAGGGPSPGD   |               | 0.71          | 1.34          | 0.77 | 0.94 | 0.200 | 3 |
| Peptidyl-prolyl cis-trans isomerase A                 | EDENFILKHTGPGLISM                   | 63.6              | 66.5              | 64.8               | 979.0121  | 983.0385  | 2 | 8    | 2.0 | 2     | 1899.9456 | 1900.001    | 1899.9733  | 0.03917       | 1899.9733        | 1.899.9473 | 14               | EDENFILKHTGPGLISM            |               | 0.73          | 1.00          | 0.66 | 0.80 | 0.104 | 3 |
| Peptidyl-prolyl cis-trans isomerase A                 | ELFADKVPKTAENFRAL                   | 51.9              | 55.2              | 55.2               | 678.3856  | 682.3981  | 3 | 12   | 3.0 | 3     | 1948.0389 | 1947.9603   | 1947.9996  | 0.05558       | 1947.9996        | 1.948.0491 | -25              | ELFADKVPKTAENFRAL            |               | 0.52          | 0.75          | 1.68 | 0.98 | 0.355 | 3 |
| Peptidyl-prolyl cis-trans isomerase A                 | LFADKVPKTAENFRAL                    | 44.3              | 50.9              | 49.3               | 635.3727  | 639.3986  | 3 | 12   | 3.0 | 3     | 1819.0002 | 1819.0818   | 1819.041   | 0.0577        | 1819.0410        | 1.819.0065 | 19               | LFADKVPKTAENFRAL             |               | 1.16          | 0.98          | 0.65 | 0.93 | 0.149 | 3 |
| Peptidyl-prolyl cis-trans isomerase A                 | ADKVPKTAENFRAL                      | 31.3              | 39.0              | 38.4               | 548.6557  | 552.6805  | 3 | 12   | 3.0 | 3     | 1558.8492 | 1558.9275   | 1558.88835 | 0.05537       | 1558.8884        | 1.558.8540 | 22               | ADKVPKTAENFRAL               |               | 0.90          | 0.77          | 0.63 | 0.77 | 0.079 | 3 |
| Peptidyl-prolyl cis-trans isomerase A                 | ITADDEPLGRVSF                       | 55.5              | 60.5              | 59.1               | 724.3787  | 726.3914  | 2 | 4    | 1.0 | 1     | 1418.7101 | 1418.7368   | 1418.72345 | 0.01888       | 1418.7235        | 1.418.7114 | 8                | ITADDEPLGRVSF                |               | 0.98          | 0.50          | 0.50 | 0.66 | 0.160 | 3 |
| Peptidyl-prolyl cis-trans isomerase A                 | ADKVPKTAENF                         | 25.9              | 33.0              | 32.3               | 652.3679  | 658.4055  | 2 | 12   | 3.0 | 3     | 1218.6259 | 1218.705    | 1218.66545 | 0.05593       | 1218.6517        | 1.218.6317 | 28               | ADKVPKTAENF                  |               | 0.75          | 0.93          | 0.45 | 0.71 | 0.140 | 3 |
| Peptidyl-prolyl cis-trans isomerase A                 | ADDEPLGRVSF                         | 47.5              | 54.7              | 54.3               | 617.3111  | 619.3237  | 2 | 4    | 1.0 | 1     | 1204.5749 | 1204.6014   | 1204.58815 | 0.01874       | 1204.5882        | 1.204.5797 | 7                | ADDEPLGRVSF                  |               | 1             | 0.98          | 0.58 | 0.85 | 0.137 | 3 |
| Peptidyl-prolyl cis-trans isomerase FKBP1A            | VDVYELLKLE                          | 71.0              | 72.2              | 72.4               | 630.8781  | 634.9038  | 2 | 8    | 2.0 | 2     | 1203.6776 | 1203.7316   | 1203.7046  | 0.03818       | 1203.7046        | 1.203.6824 | 18               | VDVYELLKLE                   |               | 0.77          | 1.10          | 0.65 | 0.84 | 0.135 | 3 |
| Phosphatidylethanolamine-binding protein 1            | DQYVPKLYEQLSGK                      | 56.6              | 60.2              | 59.6               | 580.3149  | 584.3407  | 3 | 12   | 3.0 | 3     | 1653.8268 | 1653.9081   | 1653.86745 | 0.05749       | 1653.8675        | 1.653.8323 | 21               | DQYVPKLYEQLSGK               |               | 0.59          | 0.83          | 0.60 | 0.67 | 0.078 | 3 |
| ProSAA5                                               | SLSAASAPLVETSTPLRL                  | 64.7              | 66.4              | 65.9               | 921.0261  | 923.039   | 2 | 4    | 1.0 | 1     | 1812.0049 | 1812.032    | 1812.01845 | 0.01916       | 1812.0185        | 1.812.0066 | 7                | SLSAASAPLVETSTPLRL           |               | 0.75          | 1.00          | 1.00 | 0.92 | 0.083 | 3 |
| Somatostatin                                          | SANSNPAMAPRE                        | 20.8              | 26.8              | 26.1               | 636.8049  | 638.8176  | 2 | 4    | 1.0 | 1     | 1243.5625 | 1243.5892   | 1243.57585 | 0.01888       | 1243.5759        | 1.243.5688 | 6                | SANSNPAMAPRE                 |               | 1.48          | 1.90          | 1.60 | 1.65 | 0.130 | 3 |
| Somatostatin                                          | SANSNPAMAPRE (methionine oxidation) | nd                | 23.4              | 22.9               | 644.8035  | 646.816   | 2 | 4    | 1.0 | 1     | 1259.5597 | 1259.586    | 1259.57285 | 0.0186        | 1259.5729        | 1.259.5637 | 7                | SANSNPAMAPRE (OXI)           | nd            |               | 2.50          | 1.59 | 2.03 | 0.470 | 2 |
| Tubulin beta-3 chain                                  | DDEESEAGQPK                         | nd                | 21.9              | 21.2               | 630.7849  | 634.8098  | 2 | 8    | 2.0 | 2     | 1203.4912 | 1203.5436   | 1203.5174  | 0.03705       | 1203.5174        | 1.203.4964 | 17               | DDEESEAGQPK                  | nd            |               | 2.80          | 1.66 | 2.23 | 0.570 | 2 |

Abbreviations: z=charge; m/z=mass charge ratio; T=number of tags; nd= not detected

| Protein name                                          | Peptide sequence                    | Elution time Run1 | Elution time Run2 | Elution time Run3 | m/z Light | m/z Heavy | Z | diff | T   | m/z 1 | m/z 2     | average m/z | SD         | Observed mass | Theoretical mass | ppm       | Peptide sequence | Ratio KO1/W1                        | Ratio KO2/W2 | RATIO KO3/W3 | Average ratio KO/W | SE   | n     |   |
|-------------------------------------------------------|-------------------------------------|-------------------|-------------------|-------------------|-----------|-----------|---|------|-----|-------|-----------|-------------|------------|---------------|------------------|-----------|------------------|-------------------------------------|--------------|--------------|--------------------|------|-------|---|
| Acyl-CoA-binding protein                              | ATVGDVNTDRPGLLDL                    | 60.9              | 61.0              | 64.6              | 842.4515  | 844.4658  | 2 | 4    | 1.0 | 1     | 1654.8557 | 1654.8856   | 1654.87065 | 0.02114       | 1654.8707        | 1654.8599 | 6                | ATVGDVNTDRPGLLDL                    | 0.87         | 1.66         | 0.80               | 1.04 | 0.318 | 3 |
| Acyl-CoA-binding protein                              | KQATVGDVNTDRPGLLDL                  | 51.8              | 52.5              | 57.5              | 984.5448  | 988.5694  | 2 | 8    | 2.0 | 2     | 1911.0111 | 1911.0628   | 1911.0369  | 0.03663       | 1911.0369        | 1911.0134 | 12               | KQATVGDVNTDRPGLLDL                  | 1.00         | 1.60         | 0.72               | 1.11 | 0.260 | 3 |
| Acyl-CoA-binding protein                              | KQATVGDVNTDRPGLLDL                  | 51.8              | 52.3              | 57.5              | 656.6985  | 659.3814  | 3 | 8    | 2.0 | 2     | 1911.0089 | 1911.0602   | 1911.03465 | 0.03627       | 1911.0346        | 1911.0134 | 11               | KQATVGDVNTDRPGLLDL                  | 0.95         | 1.52         | 0.61               | 1.03 | 0.265 | 3 |
| Acyl-CoA-binding protein                              | SHFKQATVGDVNTDRPGLLDL               | 50.9              | 51.1              | 56.5              | 1170.1259 | 1174.1481 | 2 | 8    | 2.0 | 2     | 2282.1732 | 2282.2202   | 2282.1967  | 0.03323       | 2282.1967        | 2282.1728 | 10               | SHFKQATVGDVNTDRPGLLDL               | 0.94         | 2.15         | 1.00               | 1.36 | 0.394 | 3 |
| Acyl-CoA-binding protein                              | TVGDVNTDRPGLLDL                     | 59.7              | 60.0              | 63.8              | 806.9318  | 808.944   | 2 | 4    | 1.0 | 1     | 1583.8163 | 1583.842    | 1583.82915 | 0.01817       | 1583.8292        | 1583.8228 | 4                | TVGDVNTDRPGLLDL                     | 0.86         | 1.68         | 0.88               | 1.07 | 0.308 | 3 |
| Acyl-CoA-binding protein                              | VEKYDELKKYQI                        | 36.6              | 36.4              | 41.3              | 963.6907  | 970.3989  | 3 | 20   | 5.0 | 5     | 1547.8916 | 1548.0227   | 1547.95715 | 0.0927        | 1547.9572        | 1547.8996 | 37               | VEKYDELKKYQI                        | 1.16         | 0.90         | 0.66               | 0.91 | 0.144 | 3 |
| Clahtin coat assembly protein AP180                   | ASKGLGSDLDSSLASL                    | 61.0              | 61.0              | 64.2              | 788.9254  | 792.9509  | 2 | 8    | 2.0 | 2     | 1519.7222 | 1519.8258   | 1519.799   | 0.0379        | 1519.7990        | 1519.7802 | 12               | ASKGLGSDLDSSLASL                    | 1.10         | 1.28         | 0.87               | 1.08 | 0.119 | 3 |
| Clahtin coat assembly protein AP180                   | SPSPPTATQSPKKPPAKDPLADLNKDFL        | 67.8              | 67.7              | 68.7              | 804.2106  | 809.2419  | 4 | 20   | 5.0 | 5     | 3072.6539 | 3072.7856   | 3072.71975 | 0.09313       | 3072.7198        | 3072.6568 | 20               | SPSPPTATQSPKKPPAKDPLADLNKDFL        | 1.00         | 1.53         | 0.87               | 1.17 | 0.182 | 3 |
| Cysteine and glycine-rich protein 1                   | GQGAGALVHSE                         | 23.8              | 23.5              | 27.9              | 527.2706  | 529.2832  | 2 | 4    | 1.0 | 1     | 1024.4939 | 1024.5204   | 1024.50715 | 0.01874       | 1024.5072        | 1024.5010 | 6                | GQGAGALVHSE                         | 1.05         | 1.10         | 1.10               | 1.08 | 0.017 | 3 |
| Cytochrome b-c1 complex subunit Rieske, mitochondrial | SGQAARPLVATV                        | 35.8              | 35.7              | 40.2              | 634.8714  | 636.8636  | 2 | 4    | 1.0 | 1     | 1239.6955 | 1239.7212   | 1239.70835 | 0.01817       | 1239.7084        | 1239.7008 | 6                | SGQAARPLVATV                        | 1.00         | 1.10         | 1.85               | 1.25 | 0.202 | 3 |
| Cytochrome b-c1 complex subunit Rieske, mitochondrial | TVGLNVPASVRF                        | 58.8              | 59.2              | 60.7              | 644.3762  | 646.3892  | 2 | 4    | 1.0 | 1     | 1258.7051 | 1258.7324   | 1258.71875 | 0.0193        | 1258.7188        | 1258.7106 | 8                | TVGLNVPASVRF                        | 1.48         | 1.05         | 0.88               | 1.17 | 0.156 | 3 |
| Cytochrome c oxidase subunit 5A, mitochondrial        | GISTPEELGLDKV                       | 54.5              | 54.8              | 58.2              | 707.3970  | 711.4219  | 2 | 8    | 2.0 | 2     | 1356.7154 | 1356.7678   | 1356.7416  | 0.03705       | 1356.7416        | 1356.7209 | 15               | GISTPEELGLDKV                       | 1.00         | 1.40         | 0.75               | 1.05 | 0.189 | 3 |
| Cytochrome c oxidase subunit 5A, mitochondrial        | RPTLNELGISTPEELGLDKV                | 64.9              | 65.2              | 66.0              | 746.4198  | 749.1033  | 3 | 8    | 2.0 | 2     | 2180.1728 | 2180.2259   | 2180.19935 | 0.03755       | 2180.1994        | 2180.1761 | 11               | RPTLNELGISTPEELGLDKV                | 1.25         | 1.60         | 0.75               | 1.20 | 0.247 | 3 |
| Cytochrome c oxidase subunit 6A1, mitochondrial       | FHNPHVNLPTGYEDE                     | 39.3              | 39.1              | 43.4              | 947.4431  | 949.4562  | 2 | 4    | 1.0 | 1     | 1864.8389 | 1864.8664   | 1864.85265 | 0.01945       | 1864.8527        | 1864.8453 | 4                | FHNPHVNLPTGYEDE                     | 1.06         | 1.33         | 0.87               | 1.09 | 0.133 | 3 |
| Cytochrome c oxidase subunit 6A1, mitochondrial       | HNPHVNLPTGYEDE                      | 33.8              | 34.0              | 38.1              | 873.9086  | 875.921   | 2 | 4    | 1.0 | 1     | 1717.7699 | 1717.7986   | 1717.78295 | 0.01846       | 1717.7830        | 1717.7769 | 4                | HNPHVNLPTGYEDE                      | 1.14         | 1.75         | 0.50               | 1.13 | 0.361 | 3 |
| Glyceroldehyde-3-phosphate dehydrogenase              | AFRVPTPNVSVIDL                      | 68.3              | 68.1              | 69.1              | 771.4396  | 773.4476  | 2 | 4    | 1.0 | 1     | 1512.8319 | 1512.8492   | 1512.84055 | 0.01223       | 1512.8406        | 1512.8373 | 2                | AFRVPTPNVSVIDL                      | 1.33         | 1.60         | 1.80               | 1.51 | 0.090 | 3 |
| Macrophage migration inhibitory factor                | AQATGKPAQYIAHVHVPDQL                | 54.3              | 54.6              | 57.1              | 721.4048  | 724.0881  | 3 | 8    | 2.0 | 2     | 2105.1278 | 2105.1803   | 2105.15405 | 0.03712       | 2105.1541        | 2105.1342 | 9                | AQATGKPAQYIAHVHVPDQL                | 1.10         | 1.10         | 1.32               | 1.17 | 0.073 | 3 |
| Microtubule-associated protein tau                    | ADEVASLAKQGL                        | 42.3              | 42.4              | 47.5              | 672.8734  | 676.8988  | 2 | 8    | 2.0 | 2     | 1287.6682 | 1287.7216   | 1287.6949  | 0.03776       | 1287.6949        | 1287.6743 | 16               | ADEVASLAKQGL                        | 1.00         | 1.02         | 1.50               | 1.17 | 0.163 | 3 |
| Neurogranin                                           | GRKGPGGGPGGAGGARGAGGGPSPGD          | 17.8              | 17.1              | 21.9              | 544.2773  | 546.2896  | 4 | 8    | 2.0 | 2     | 2117.0146 | 2117.0664   | 2117.0405  | 0.03663       | 2117.0405        | 2117.0184 | 10               | GRKGPGGGPGGAGGARGAGGGPSPGD          | 0.89         | 0.78         | 0.85               | 0.84 | 0.032 | 3 |
| Neurogranin                                           | KGPGPGGGAGGARGAGGGPSPGD             | 19.2              | 18.6              | 23.1              | 654.3266  | 657.0099  | 3 | 8    | 2.0 | 2     | 1903.8932 | 1903.9457   | 1903.91945 | 0.03712       | 1903.9195        | 1903.8958 | 12               | KGPGPGGGAGGARGAGGGPSPGD             | 0.78         | 0.77         | 0.79               | 0.78 | 0.006 | 3 |
| Neurogranin                                           | KGPGPGGGAGGARGAGGGPSPGD             | 18.9              | 18.9              | 23.1              | 980.9834  | 985.008   | 2 | 8    | 2.0 | 2     | 1903.8882 | 1903.94     | 1903.9141  | 0.03663       | 1903.9141        | 1903.8958 | 10               | KGPGPGGGAGGARGAGGGPSPGD             | 0.62         | 0.69         | 0.62               | 0.64 | 0.023 | 3 |
| Neurogranin                                           | RKGPFGPGGGAGGARGAGGGPSPGD           | 17.3              | 16.9              | 21.8              | 706.3609  | 709.044   | 3 | 8    | 2.0 | 2     | 2059.9961 | 2060.048    | 2060.02205 | 0.0367        | 2060.0221        | 2059.9969 | 12               | RKGPFGPGGGAGGARGAGGGPSPGD           | 1.16         | 2.30         | 0.39               | 1.28 | 0.555 | 3 |
| Peptidyl-prolyl cis-trans isomerase A                 | ADDEPLGRVSF                         | 49.1              | 49.5              | 55.2              | 617.3094  | 619.3221  | 2 | 4    | 1.0 | 1     | 1204.5715 | 1204.5982   | 1204.58485 | 0.01888       | 1204.5849        | 1204.5797 | 4                | ADDEPLGRVSF                         | 1.08         | 1.08         | 1.15               | 1.10 | 0.023 | 3 |
| Peptidyl-prolyl cis-trans isomerase A                 | ADKVPKTAENFRAL                      | 33.7              | 33.5              | 38.2              | 822.4785  | 828.5163  | 2 | 12   | 3.0 | 3     | 1558.8471 | 1558.9266   | 1558.88685 | 0.05621       | 1558.8869        | 1558.8540 | 21               | ADKVPKTAENFRAL                      | 1.10         | 1.02         | 1.65               | 1.26 | 0.198 | 3 |
| Peptidyl-prolyl cis-trans isomerase A                 | ADKVPKTAENFR                        | 23.8              | 23.7              | nd                | 487.2813  | 491.3062  | 3 | 12   | 3.0 | 3     | 1374.726  | 1374.8046   | 1374.7653  | 0.05558       | 1374.7653        | 1374.7328 | 24               | ADKVPKTAENFR                        | 1.06         | 1.66         | nd                 | 1.36 | 0.300 | 2 |
| Peptidyl-prolyl cis-trans isomerase A                 | ELFADKVPKTAENF                      | 48.3              | 48.7              | nd                | 846.9666  | 853.0028  | 2 | 12   | 3.0 | 3     | 1607.8233 | 1607.8996   | 1607.86145 | 0.05396       | 1607.8615        | 1607.8268 | 22               | ELFADKVPKTAENF                      | 0.96         | 1.42         | nd                 | 1.19 | 0.230 | 2 |
| Phosphatidylethanolamine-binding protein 1            | KGNDISSGTVLSDYVSGSPPSGTGL           | 61.4              | 61.6              | nd                | 1211.1600 | 1215.1393 | 2 | 8    | 2.0 | 2     | 2364.2414 | 2364.2026   | 2364.222   | 0.02744       | 2364.2220        | 2364.1518 | 30               | KGNDISSGTVLSDYVSGSPPSGTGL           | 1.33         | 1.62         | nd                 | 1.38 | 0.045 | 2 |
| Phosphatidylethanolamine-binding protein 1            | AGVTVDLQKVL                         | 60.5              | 60.9              | nd                | 628.8796  | 632.9054  | 2 | 8    | 2.0 | 2     | 1199.6806 | 1199.7348   | 1199.7077  | 0.03833       | 1199.7077        | 1199.6834 | 20               | AGVTVDLQKVL                         | 0.87         | 1.35         | nd                 | 1.11 | 0.240 | 2 |
| Phosphatidylethanolamine-binding protein 1            | GVTVDLQKVLTPQTQV                    | 64.5              | 64.9              | 66.4              | 856.5344  | 860.5231  | 2 | 8    | 2.0 | 2     | 1654.9902 | 1654.9702   | 1654.9802  | 0.01414       | 1654.9802        | 1654.9214 | 36               | GVTVDLQKVLTPQTQV                    | 0.83         | 1.50         | 1.33               | 1.22 | 0.201 | 3 |
| Phosphatidylethanolamine-binding protein 1            | DDYVPKLYEQLSGK                      | 56.9              | 57.2              | 60.5              | 580.3149  | 584.3407  | 3 | 12   | 3.0 | 3     | 1653.8268 | 1653.9081   | 1653.86745 | 0.05749       | 1653.8675        | 1653.8323 | 21               | DDYVPKLYEQLSGK                      | 0.85         | 1.42         | 1.06               | 1.11 | 0.166 | 3 |
| Phosphatidylethanolamine-binding protein 1            | AGVTVDLQKVLTPQTQV                   | 65.6              | 65.7              | 67.0              | 892.0162  | 896.0409  | 2 | 8    | 2.0 | 2     | 1725.9538 | 1726.0058   | 1725.9798  | 0.03677       | 1725.9798        | 1725.9595 | 12               | AGVTVDLQKVLTPQTQV                   | 1.33         | 1.40         | 1.46               | 1.40 | 0.038 | 3 |
| Proenkephalin-A                                       | SPQLEDEAKELQ                        | 38.5              | 38.4              | 44.2              | 721.8737  | 725.8987  | 2 | 8    | 2.0 | 2     | 1385.6688 | 1385.7214   | 1385.6951  | 0.03719       | 1385.6951        | 1385.6747 | 15               | SPQLEDEAKELQ                        | 1.10         | 0.25         | 0.71               | 0.69 | 0.246 | 3 |
| ProSAAS                                               | ASAPLVETSTPLRL                      | 57.8              | 58.5              | nd                | 741.9335  | 743.9453  | 2 | 4    | 1.0 | 1     | 1453.8197 | 1453.8446   | 1453.83215 | 0.01761       | 1453.8322        | 1453.8213 | 7                | ASAPLVETSTPLRL                      | 1.42         | 0.99         | nd                 | 1.20 | 0.216 | 2 |
| ProSAAS                                               | SLSAASAPLVETSTPLRL                  | 66.0              | 66.0              | 67.1              | 921.0241  | 923.0366  | 2 | 4    | 1.0 | 1     | 1812.0009 | 1812.0272   | 1812.01405 | 0.0186        | 1812.0141        | 1812.0068 | 4                | SLSAASAPLVETSTPLRL                  | 1.43         | 1.60         | 0.58               | 1.20 | 0.316 | 3 |
| Secretogranin-1                                       | SFARAPOLDL                          | 51.6              | 52.5              | 57.2              | 573.3200  | 575.3326  | 2 | 4    | 1.0 | 1     | 1116.5927 | 1116.6192   | 1116.60595 | 0.01874       | 1116.6060        | 1116.6000 | 5                | SFARAPOLDL                          | 2.00         | 1.00         | 1.00               | 1.33 | 0.333 | 3 |
| Secretogranin-1                                       | LLEDGHPVRESPIDTA                    | 41.6              | 41.5              | 46.2              | 970.4936  | 972.5067  | 2 | 4    | 1.0 | 1     | 1910.9399 | 1910.9714   | 1910.95565 | 0.02227       | 1910.9557        | 1910.9447 | 6                | LLEDGHPVRESPIDTA                    | 1.52         | 1.60         | 2.00               | 1.71 | 0.148 | 3 |
| Somatostatin                                          | SANSNPAMAPRE                        | 21.8              | 21.4              | 25.7              | 638.8052  | 638.8178  | 2 | 4    | 1.0 | 1     | 1243.5631 | 1243.5896   | 1243.57635 | 0.01874       | 1243.5764        | 1243.5688 | 8                | SANSNPAMAPRE                        | 2.85         | 0.75         | 2.50               | 2.03 | 0.850 | 3 |
| Somatostatin                                          | SANSNPAMAPRE (methionine oxidation) | 18.2              | 17.9              | nd                | 644.8033  | 646.8157  | 2 | 4    | 1.0 | 1     | 1259.5593 | 1259.5854   | 1259.57235 | 0.01846       | 1259.5724        | 1259.5637 | 7                | SANSNPAMAPRE (methionine oxidation) | 2.66         | 0.87         | 2.00               | 1.84 | 0.523 | 3 |
| Synapsin-1                                            | AGGPPHPQLNKS                        | 22.4              | 22.1              | nd                | 629.8502  | 633.8749  | 2 | 8    | 2.0 | 2     | 1201.6218 | 1201.6738   | 1201.6478  | 0.03677       | 1201.6478        | 1201.6276 | 17               | AGGPPHPQLNKS                        | 1.25         | 0.68         | nd                 | 0.97 | 0.285 | 2 |
| Tubulin beta-2A chain                                 | SGPFGQIFRPDNF                       | 67.5              | 67.4              | 69.7              | 755.3795  | 757.3921  | 2 | 4    | 1.0 | 1     | 1480.7117 | 1480.7382   | 1480.72495 | 0.01874       | 1480.7250        | 1480.7172 | 5                | SGPFGQIFRPDNF                       | 0.97         | 0.75         | 1.48               | 1.07 | 0.216 | 3 |

| Protein name                                          | Peptide sequence             | Elution time Run1 | Elution time Run2 | Elution time Run 3 | m/z       | Light     | m/z | Heavy | Z   | diff | T         | m/z 1     | m/z 2      | average m/z | SD         | Observed mass | Theoretical mass | ppm                          | Peptide sequence | Ratio K01/W11 | Ratio K02/W12 | RATIO K03/W13 | Average ratio | SE | n |
|-------------------------------------------------------|------------------------------|-------------------|-------------------|--------------------|-----------|-----------|-----|-------|-----|------|-----------|-----------|------------|-------------|------------|---------------|------------------|------------------------------|------------------|---------------|---------------|---------------|---------------|----|---|
| Acyl-CoA-binding protein                              | ATVGDVNTRDPLLDL              | 60.3              | 57.6              | 64.2               | 842.4547  | 744.4669  | 2   | 4     | 1.0 | 1    | 1654.8621 | 1654.8878 | 1654.87495 | 0.01817264  | 1654.8750  | 1654.8599     | 9                | ATVGDVNTRDPLLDL              | 0.72             | 1.66          | 3.00          | 1.79          | 0.662         | 3  |   |
| Acyl-CoA-binding protein                              | GDVNTDRPGLLDL                | 53.2              | 51.8              | 61.1               | 706.8754  | 708.8877  | 2   | 4     | 1.0 | 1    | 1383.7035 | 1383.7294 | 1383.71645 | 0.01831407  | 1383.7165  | 1383.7087     | 7                | GDVNTDRPGLLDL                | 1.07             | 1.55          | 3.01          | 1.88          | 0.583         | 3  |   |
| Acyl-CoA-binding protein                              | KQATVGDVNTRDPLLDL            | 48.9              | 47.4              | 56.9               | 984.5476  | 986.5691  | 2   | 8     | 2.0 | 2    | 1911.0166 | 1911.0622 | 1911.0394  | 0.03224407  | 1911.0394  | 1911.0134     | 14               | KQATVGDVNTRDPLLDL            | 0.77             | 2.00          | 4.72          | 2.49          | 1.168         | 3  |   |
| Acyl-CoA-binding protein                              | KQATVGDVNTRDPLLDL            | 48.9              | 47.4              | 56.9               | 656.6997  | 659.381   | 3   | 8     | 2.0 | 2    | 1911.0125 | 1911.0579 | 1911.03575 | 0.03288047  | 1911.0358  | 1911.0134     | 12               | KQATVGDVNTRDPLLDL            | 0.75             | 1.76          | 4.00          | 2.17          | 0.961         | 3  |   |
| Acyl-CoA-binding protein                              | TVGVDNTRDPLLDL               | 58.8              | 56.4              | 63.7               | 806.9332  | 808.9454  | 2   | 4     | 1.0 | 1    | 1583.8191 | 1583.8448 | 1583.83195 | 0.01817264  | 1583.8320  | 1583.8228     | 6                | TVGVDNTRDPLLDL               | 0.85             | 1.82          | 5.25          | 2.64          | 1.335         | 3  |   |
| Acyl-CoA-binding protein                              | VEKVDELKKYGI                 | 34.4              | 34.4              | 41.6               | 563.6919  | 570.4003  | 3   | 20    | 5.0 | 5    | 1547.8952 | 1549.0269 | 1547.96105 | 0.00312596  | 1547.9611  | 1547.8996     | 40               | VEKVDELKKYGI                 | 1.00             | 1.75          | 4.00          | 2.25          | 0.901         | 3  |   |
| Acyl-CoA-binding protein                              | VEKVDELKKYGI                 | 34.3              | 34.5              | 41.6               | 845.0334  | 855.0981  | 2   | 20    | 5.0 | 5    | 1547.8943 | 1548.0302 | 1547.96225 | 0.00605681  | 1547.9623  | 1547.8996     | 40               | VEKVDELKKYGI                 | 0.87             | 1.93          | 3.40          | 2.07          | 0.734         | 3  |   |
| ATP synthase-coupling factor 6, mitochondrial         | KFDDPKFEVDKPS                | 38.0              | 37.5              | nd                 | 953.0285  | 961.0734  | 2   | 16    | 4.0 | 4    | 1791.9118 | 1792.0108 | 1791.9613  | 0.07000357  | 1791.9613  | 1791.9116     | 28               | KFDDPKFEVDKPS                | 0.87             | 1.38          | nd            | 1.12          | 0.255         | 2  |   |
| Cerebellin-4                                          | SKVAFSAVRSTN                 | 25.0              | 24.1              | 29.6               | 441.5750  | 444.2707  | 3   | 8     | 2.0 | 2    | 1265.6744 | 1265.7281 | 1265.70125 | 0.03797163  | 1265.7013  | 1265.6801     | 17               | SKVAFSAVRSTN                 | 1.33             | 0.65          | 0.70          | 0.89          | 0.216         | 3  |   |
| Citathrin coat assembly protein AP180                 | ASKGLGSLDSSLASL              | 60.8              | 58.5              | 64.2               | 788.9260  | 792.9506  | 2   | 8     | 2.0 | 2    | 1519.7734 | 1519.8252 | 1519.7993  | 0.03662813  | 1519.7993  | 1519.7802     | 13               | ASKGLGSLDSSLASL              | 1.11             | 1.07          | 0.97          | 1.05          | 0.042         | 3  |   |
| Citathrin coat assembly protein AP180                 | SPSPPTATQSPKPKPAKDPLADLNKDFL | 66.0              | 62.2              | 68.7               | 804.2125  | 809.244   | 4   | 20    | 5.0 | 5    | 3072.6615 | 3072.794  | 3072.7275  | 0.00369165  | 3072.7278  | 3.072.6568    | 23               | SPSPPTATQSPKPKPAKDPLADLNKDFL | 1.12             | 0.93          | 0.92          | 0.99          | 0.065         | 3  |   |
| Cysteine and glycine-rich protein 1                   | GQGAGALVHSE                  | 23.2              | 22.6              | 27.9               | 527.2711  | 529.2838  | 2   | 4     | 1.0 | 1    | 1024.4949 | 1024.5216 | 1024.50825 | 0.01887975  | 1024.50825 | 1024.501      | 7                | GQGAGALVHSE                  | 0.90             | 3.00          | 2.60          | 2.17          | 0.644         | 3  |   |
| Cytochrome b-c1 complex subunit Rieske, mitochondrial | SGQAAARPLVA                  | 24.8              | 24.5              | 29.1               | 534.8131  | 536.8254  | 2   | 4     | 1.0 | 1    | 1039.5789 | 1039.6048 | 1039.59185 | 0.01831407  | 1039.5919  | 1039.5847     | 7                | SGQAAARPLVA                  | 1.08             | 0.80          | 1.14          | 1.01          | 0.103         | 3  |   |
| Cytochrome b-c1 complex subunit Rieske, mitochondrial | SGQAAARPLVATV                | 33.6              | 33.4              | 40.2               | 634.8714  | 636.8836  | 2   | 4     | 1.0 | 1    | 1239.6955 | 1239.7212 | 1239.70835 | 0.01817264  | 1239.7084  | 1239.7004     | 8                | SGQAAARPLVATV                | 0.99             | 0.78          | 1.05          | 0.94          | 0.083         | 3  |   |
| Cytochrome b-c1 complex subunit Rieske, mitochondrial | TVGLNVPASVRF                 | 57.3              | 54.7              | 60.7               | 644.3773  | 646.3898  | 2   | 4     | 1.0 | 1    | 1258.7073 | 1258.7336 | 1258.72045 | 0.01859691  | 1258.7205  | 1258.7106     | 8                | TVGLNVPASVRF                 | 1.15             | 0.71          | 1.07          | 0.98          | 0.136         | 3  |   |
| Cytochrome c oxidase subunit 5A, mitochondrial        | GISTPEELGLDKV                | 51.9              | 50.5              | 58.2               | 707.3984  | 711.4236  | 2   | 8     | 2.0 | 2    | 1356.7182 | 1356.7712 | 1356.7447  | 0.03747686  | 1356.7447  | 1356.7209     | 18               | GISTPEELGLDKV                | 0.84             | 1.77          | 1.53          | 1.51          | 0.339         | 3  |   |
| Cytochrome c oxidase subunit 5A, mitochondrial        | NDFASARVLEIV                 | 69.8              | 69.2              | 72.5               | 681.3779  | 683.3907  | 2   | 4     | 1.0 | 1    | 1332.7085 | 1332.7354 | 1332.72195 | 0.01902117  | 1332.7220  | 1332.7110     | 8                | NDFASARVLEIV                 | 0.95             | 2.00          | 2.15          | 1.70          | 0.376         | 3  |   |
| Cytochrome c oxidase subunit 5A, mitochondrial        | RPTLNELGISTPEELGLDKV         | 64.6              | 62.5              | 66.1               | 746.4225  | 749.1057  | 3   | 8     | 2.0 | 2    | 2180.1809 | 2180.2331 | 2180.207   | 0.03691097  | 2180.2070  | 2.180.1781    | 14               | RPTLNELGISTPEELGLDKV         | 0.79             | 1.80          | 2.00          | 1.53          | 0.374         | 3  |   |
| Cytochrome c oxidase subunit 6A1, mitochondrial       | HNPHVNLPTGYEDE               | 36.9              | 37.4              | 44.1               | 947.4456  | 949.4577  | 2   | 4     | 1.0 | 1    | 1864.8439 | 1864.8694 | 1864.85665 | 0.01803122  | 1864.8567  | 1864.8453     | 6                | HNPHVNLPTGYEDE               | 1.00             | 0.96          | 1.40          | 1.12          | 0.139         | 3  |   |
| Cytochrome c oxidase subunit 6A1, mitochondrial       | HNPHVNLPTGYEDE               | 37.2              | 32.6              | 37.4               | 873.9091  | 875.922   | 2   | 4     | 1.0 | 1    | 1717.7709 | 1717.798  | 1717.78445 | 0.01916259  | 1717.7845  | 1717.7769     | 4                | HNPHVNLPTGYEDE               | 0.98             | 1.27          | 1.66          | 1.30          | 0.198         | 3  |   |
| Cytochrome c oxidase subunit 6A1, mitochondrial       | NPHVNLPTGYEDE                | 37.2              | 36.9              | 43.4               | 805.3803  | 807.3929  | 2   | 4     | 1.0 | 1    | 1580.7133 | 1580.7398 | 1580.72655 | 0.01873833  | 1580.7266  | 1580.7180     | 5                | NPHVNLPTGYEDE                | 1.11             | 0.74          | 1.36          | 1.07          | 0.180         | 3  |   |
| Gamma-enolase                                         | AGNSDLPLVPFAFNVINGGSHAGNKL   | 71.7              | 69.5              | 72.8               | 877.8140  | 880.4963  | 3   | 8     | 2.0 | 2    | 2574.3554 | 2574.4049 | 2574.38015 | 0.03500179  | 2574.3802  | 2.574.3827    | 7                | AGNSDLPLVPFAFNVINGGSHAGNKL   | 1.11             | 0.42          | 0.74          | 0.76          | 0.198         | 3  |   |
| Glyceraldehyde-3-phosphate dehydrogenase              | AFRVPTPNVSVDDL               | 66.9              | 66.1              | 69.1               | 771.4396  | 773.4497  | 2   | 4     | 1.0 | 1    | 1512.8319 | 1512.8534 | 1512.84265 | 0.01520028  | 1512.8427  | 1.512.8373    | 4                | AFRVPTPNVSVDDL               | 0.83             | 1.14          | 1.00          | 0.99          | 0.088         | 3  |   |
| LIM zinc-binding domain-containing Nebulette          | TQVVSDAAYKGQVPHV             | 38.1              | 37.6              | 44.6               | 927.5132  | 931.5369  | 2   | 8     | 2.0 | 2    | 1796.9478 | 1796.9978 | 1796.9728  | 0.03535534  | 1796.9728  | 1.796.9494    | 13               | TQVVSDAAYKGQVPHV             | 1.30             | 0.53          | 0.95          | 0.93          | 0.223         | 3  |   |
| Macrophage migration inhibitory factor                | AQATGKPAQVIA                 | 27.1              | 26.7              | nd                 | 637.8605  | 641.8856  | 2   | 8     | 2.0 | 2    | 1217.6424 | 1217.6952 | 1217.6688  | 0.03733524  | 1217.6688  | 1.217.6477    | 17               | AQATGKPAQVIA                 | 1.15             | 1.18          | nd            | 1.17          | 0.017         | 2  |   |
| Macrophage migration inhibitory factor                | AQATGKPAQYIAHHVPPDQL         | 50.9              | 49.3              | 57.3               | 1081.6071 | 1085.6313 | 2   | 8     | 2.0 | 2    | 2105.1386 | 2105.1866 | 2105.1611  | 0.03866245  | 2105.1611  | 2.105.1342    | 13               | AQATGKPAQYIAHHVPPDQL         | 1.02             | 0.71          | 0.51          | 0.75          | 0.150         | 3  |   |
| Macrophage migration inhibitory factor                | AQATGKPAQYIAHHVPPDQL         | 50.9              | 49.9              | 57.3               | 721.4066  | 724.0896  | 3   | 8     | 2.0 | 2    | 2105.1332 | 2105.1848 | 2105.159   | 0.03849671  | 2105.1590  | 2.105.1342    | 12               | AQATGKPAQYIAHHVPPDQL         | 0.95             | 0.75          | 0.88          | 0.87          | 0.068         | 3  |   |
| Microtubule-associated protein 2                      | AEDVTAALAKQGL                | 48.1              | 47.4              | 54.4               | 671.8840  | 675.9103  | 2   | 8     | 2.0 | 2    | 1285.6894 | 1285.7446 | 1285.717   | 0.03903229  | 1285.7170  | 1.285.6951    | 17               | AEDVTAALAKQGL                | 0.99             | 0.78          | 0.86          | 0.87          | 0.060         | 3  |   |
| Microtubule-associated protein tau                    | ADEVSAASLAKQGL               | 41.1              | 40.4              | 47.6               | 672.8743  | 676.8996  | 2   | 8     | 2.0 | 2    | 1287.67   | 1287.7232 | 1287.6966  | 0.03761808  | 1287.6966  | 1.287.6743    | 17               | ADEVSAASLAKQGL               | 1.12             | 0.71          | 1.03          | 0.95          | 0.122         | 3  |   |
| Neurogranin                                           | GRKPGPGGGPGGAGGARGAGGGPGSGD  | 16.4              | 16.1              | 21.4               | 725.3685  | 728.0512  | 3   | 8     | 2.0 | 2    | 2117.0189 | 2117.0696 | 2117.04425 | 0.03585031  | 2117.0443  | 2.117.0184    | 12               | GRKPGPGGGPGGAGGARGAGGGPGSGD  | 0.85             | 1.68          | 0.71          | 1.08          | 0.301         | 3  |   |
| Neurogranin                                           | KGPFGPGGGAGGARGAGGGPGSGD     | 18.7              | 18.0              | 22.9               | 980.9864  | 985.0126  | 2   | 8     | 2.0 | 2    | 1903.8942 | 1903.9492 | 1903.9217  | 0.03889087  | 1903.9217  | 1.903.8958    | 14               | KGPFGPGGGAGGARGAGGGPGSGD     | 0.86             | 2.08          | 1.81          | 1.58          | 0.370         | 3  |   |
| Neurogranin                                           | KGPFGPGGGAGGARGAGGGPGSGD     | 18.7              | 17.9              | 22.9               | 654.3271  | 657.0103  | 3   | 8     | 2.0 | 2    | 1903.8947 | 1903.9499 | 1903.9208  | 0.03891097  | 1903.9208  | 1.903.8958    | 13               | KGPFGPGGGAGGARGAGGGPGSGD     | 0.97             | 2.27          | 1.66          | 1.63          | 0.374         | 3  |   |
| Neurogranin                                           | RKPGPGGGPGGAGGARGAGGGPGSGD   | 17.0              | 16.1              | 21.7               | 706.3608  | 709.044   | 3   | 8     | 2.0 | 2    | 2059.9958 | 2060.0480 | 2060.0219  | 0.03691097  | 2060.0219  | 2.059.9969    | 12               | RKPGPGGGPGGAGGARGAGGGPGSGD   | 1.23             | 1.16          | 2.33          | 1.57          | 0.379         | 3  |   |
| Peptidyl-prolyl cis-trans isomerase A                 | FDITADDEPLGRVSF              | 67.4              | 67.4              | 71.0               | 855.4278  | 857.4405  | 2   | 4     | 1.0 | 1    | 1680.8083 | 1680.835  | 1680.82165 | 0.01887975  | 1680.8217  | 1.680.8068    | 9                | FDITADDEPLGRVSF              | 1.10             | 1.37          | 0.61          | 1.03          | 0.221         | 3  |   |
| Peptidyl-prolyl cis-trans isomerase A                 | ITADDEPLGRVSF                | 53.7              | 52.0              | 59.8               | 724.3763  | 726.3896  | 2   | 4     | 1.0 | 1    | 1418.7053 | 1418.7332 | 1418.71925 | 0.01972828  | 1418.7193  | 1.418.7114    | 6                | ITADDEPLGRVSF                | 1.04             | 0.62          | 0.98          | 0.88          | 0.130         | 3  |   |
| Peptidyl-prolyl cis-trans isomerase A                 | LFADKVPKTAENF                | 40.4              | 39.4              | 47.1               | 521.9648  | 525.9901  | 3   | 12    | 3.0 | 3    | 1478.7785 | 1478.8563 | 1478.8164  | 0.05642712  | 1478.8164  | 1.478.7842    | 22               | LFADKVPKTAENF                | 1.36             | 0.59          | 0.92          | 0.96          | 0.223         | 3  |   |
| Peptidyl-prolyl cis-trans isomerase FKBP1A            | VFDVLLKLE                    | 70.3              | 68.5              | nd                 | 630.8798  | 634.905   | 2   | 8     | 2.0 | 2    | 1203.681  | 1203.7338 | 1203.7074  | 0.03733524  | 1203.7074  | 1.203.6824    | 21               | VFDVLLKLE                    | 0.82             | 1.25          | nd            | 1.01          | 0.216         | 2  |   |
| Phosphatidylethanolamine-binding protein 1            | KGNDISSGTVL                  | 31.3              | 31.3              | 37.5               | 573.8236  | 577.8486  | 2   | 8     | 2.0 | 2    | 1089.5686 | 1089.6122 | 1089.5949  | 0.03719382  | 1089.5949  | 1.089.5739    | 19               | KGNDISSGTVL                  | 1.14             | 0.87          | 1.28          | 1.10          | 0.120         | 3  |   |
| Phosphatidylethanolamine-binding protein 1            | GLDPGKLYTL                   | 53.8              | 52.0              | 60.6               | 566.8395  | 570.8616  | 2   | 8     | 2.0 | 2    | 1075.5944 | 1075.6472 | 1075.6208  | 0.03733524  | 1075.6208  | 1.075.5986    | 21               | GLDPGKLYTL                   | 1.00             | 0.50          | 0.80          | 0.77          | 0.145         | 3  |   |
| Phosphatidylethanolamine-binding protein 1            | GLDPGKLYTL                   | 59.3              | 57.3              | 63.5               | 624.3498  | 628.3755  | 2   | 8     | 2.0 | 2    | 1190.621  | 1190.675  | 1190.648   | 0.03818377  | 1190.6480  | 1.190.6256    | 19               | GLDPGKLYTL                   | 0.75             | 1.00          | 1.42          | 1.06          | 0.195         | 3  |   |
| Phosphatidylethanolamine-binding protein 1            | DDYVPKLYEQLSGK               | 53.5              | 53.6              | 60.5               | 580.3162  | 584.3405  | 3   | 12    | 3.0 | 3    | 1653.8307 | 1653.9075 | 1653.8691  | 0.0543058   | 1653.8691  | 1.653.8253    | 22               | DDYVPKLYEQLSGK               | 0.85             | 0.68          | 0.85          | 0.79          | 0.057         | 3  |   |
| Phosphatidylethanolamine-binding protein 1            | AGVTVDELGKLTPTQV             | 64.9              | 63.6              | 67.0               | 892.0186  | 896.0447  | 2   | 8     | 2.0 | 2    | 1725.9586 | 1726.0134 | 1725.986   | 0.03874945  | 1725.9860  | 1.725.9585    | 16               | AGVTVDELGKLTPTQV             | 0.95             | 0.60          | 0.88          | 0.81          | 0.107         | 3  |   |
| Proenkephalin-A                                       | SPOLEDEAKELQ                 | 36.9              | 36.8              | 44.2               | 721.8748  | 725.8996  | 2   | 8     | 2.0 | 2    | 1385.671  | 1385.7232 | 1385.6971  | 0.03691097  | 1385.6971  | 1.385.6747    | 16               | SPOLEDEAKELQ                 | 1.04             | 0.43          | 1.00          | 0.83          | 0.196         | 3  |   |
| ProSAAS                                               | SLSAASAPLVETSTPLRL           | 64.7              | 62.4              | nd                 | 921.0273  | 923.039   | 2   | 4     | 1.0 | 1    | 1812.0073 | 1812.032  | 1812.01965 | 0.01746554  | 1812.0197  | 1.812.0066    | 7                | SLSAASAPLVETSTPLRL           | 1.00             | 0.68          | nd            | 0.84          | 0.161         | 2  |   |
| Secretogranin-1                                       | SFARAPQLDL                   | 48.4              | 47.6              | 57.2               | 573.3215  | 575.3341  | 2   | 4     | 1.0 | 1    | 1116.5957 | 1116.6222 | 1116.60895 | 0.01873833  | 1116.6090  | 1.116.6000    | 8                | SFAR                         |                  |               |               |               |               |    |   |
