# Supplementary material for: Thimet Oligopeptidase (EC 3.4.24.15) Key Functions Suggested by Knockout Mice Phenotype Characterization
Source: MDPI journal article supplement (doi:10.3390/biom9080382), 2019-08-19
Supplement: s1 [file s1]

**Thimet oligopeptidase (EC 3.4.24.15) key functions suggested by knockout mice phenotype characterization**

Dos Santos, N.B.<sup>1#</sup>, Franco, R.D.<sup>1#</sup>, Camarini, R.<sup>1</sup>, Munhoz, C.D.<sup>1</sup>, Eichler, R.A.S.<sup>1</sup>, Gewehr, M.C.F.<sup>1</sup>, Reckziegel, P.<sup>1</sup>, Llanos, R.P.<sup>1</sup>, Dale, C.S.<sup>2</sup>, Oliveira, V.R.<sup>2</sup>, Borges, V.F.<sup>3</sup>, Lima, B.H.F.<sup>3</sup>, Cunha, F.Q.<sup>3</sup>, Visniauskas, B.<sup>4</sup>, Chagas, J.R.<sup>4</sup>, Tufik, S.<sup>4</sup>, Peres, F.F.<sup>5</sup>, Abilio, V.C.<sup>5</sup>, Florio, J.C.<sup>6</sup>, Iwai, L.K.<sup>7</sup>, Rioli, V.<sup>7</sup>, Prezoto, B.C.<sup>8</sup>, Guimaraes, A.O.<sup>9</sup>, Pesquero, J.B.<sup>9</sup>, Bader, M.<sup>10,11,12,13,14</sup>, Castro, L.M.<sup>15</sup>, and Ferro, E.S.<sup>1\*</sup>

Department of <sup>1</sup>Pharmacology and <sup>2</sup>Anatomy, Biomedical Sciences Institute, and <sup>6</sup>Department of Pathology, Veterinarian Medical School, University of São Paulo (USP), São Paulo, 05508-000; <sup>3</sup>*Department of Pharmacology, Faculty of Medicine of Ribeirão Preto, University of São Paulo, Ribeirão Preto, SP, 14049-900*; Departments of <sup>4</sup>Psychobiology, <sup>5</sup>Pharmacology and <sup>9</sup>Biophysics, Federal University of São Paulo (UNIFESP), São Paulo, 04023-062; <sup>7</sup>Special Laboratory of Applied Toxinology (LETA), Center of Toxins, Immune Response and Cell Signaling (CETICS), <sup>8</sup>Pharmacology Department, Butantan Institute, 05503-000, São Paulo; <sup>10</sup>Max-Delbrück-Center for Molecular Medicine, D-13125, Berlin, Germany, <sup>11</sup>Charité - Universitätsmedizin Berlin, <sup>12</sup>Berlin Institute of Health (BIH), Berlin, Germany, <sup>13</sup>DZHK (German Center for Cardiovascular Research), Partner Site Berlin, Berlin, Germany, <sup>14</sup>Institute for Biology, University of Lübeck, Lübeck, Germany, <sup>15</sup>Biosciences Institute, São Paulo State University (UNESP), São Vicente, 11330-900; SP, Brazil.

**Running Title:** THOP1 knockout mice

**\*To whom correspondence should be addressed:** Emer S. Ferro, PhD, Professor, Av. Prof. Lineu Prestes 1524, Sala 317, São Paulo, SP, 05508-000, Brazil, Phone: +55-11-3091-7310, Fax: +55-11-3091-7322, e-mail: [eferro@usp.br](mailto:eferro@usp.br)

**#These two authors contributed equally**

**Keywords:** THOP1; neurodegeneration; inflammation; sepsis; MHC-I; peptidome.

## Supplementary information for Microarray data

### Experimental design

A differential expression analysis was conducted on 30 samples from 3 regions of mouse CNS. Samples were either wild-type (WT) or thimet oligopeptidase 1 (EC 3.4.25.15; THOP1) knockout for the gene (THOP1<sup>-/-</sup>). Only thymine DNA glycosylase (TDG) gene was found differentially expressed between WT and THOP1<sup>-/-</sup> mice for all regions with a FDR of approximately 0.001. A second round of analysis leaving out outlier samples produced similar results from pre-frontal cortex (PFC) and striatum (ST) samples. However, 395 differentially expressed genes were identified from hippocampus (HC) samples.

Wild-type (WT, n =5) and THOP1<sup>-/-</sup> (KO, n =5) individuals had RNA extracted for 3 CNS regions: prefrontal cortex (PFC), striatum (EST) and hippocampus (HC). The microarray experiments were performed with 30 individual mRNA samples submitted to Affymetrix (Thermo Fisher Scientific) GeneChip Mouse Gene 2.0 ST Array platform, generating 41.345 probe sets readings, of which 33.793 are the main ones and 7.552 are control probe sets. A second analysis was also executed for the set of samples without outliers, as described further ahead in the samples correlations analysis. Analysis were run with R (v3.4.0) statistical environment packages including BioConductor project packages. The Affymetrix microarray analysis routines, quality control, background removal and normalization were done using the protocols of the Oligo (v1.38.0) package. Differential expression testing, as well as rendering related figures, were conducted with the help of the Limma (v3.30.13) package. Hierarchical clustering and heatmap rendering was executed using the PoiClu (v1.0.2) and Pheatmap (v1.0.8) packages. Part of the color scales used in illustrations was done with the help of the RColorBrewer (v1.1-2) package. Differentially expressed genes were submitted to the Panther DB tools (pantherdb.org) v12 for classification and overrepresentation tests (release 20170413) of Gene Ontology classes (GO), Panther protein classes, metabolic pathways and reactome pathways (v58). StringDB (v10.5) evidence cutoff was 0.9 (highest confidence) and MCL clustering inflation parameter was set at 6.

## Quality control

The intensity amplitude from these samples showed good consistency among all replicates and experiments.

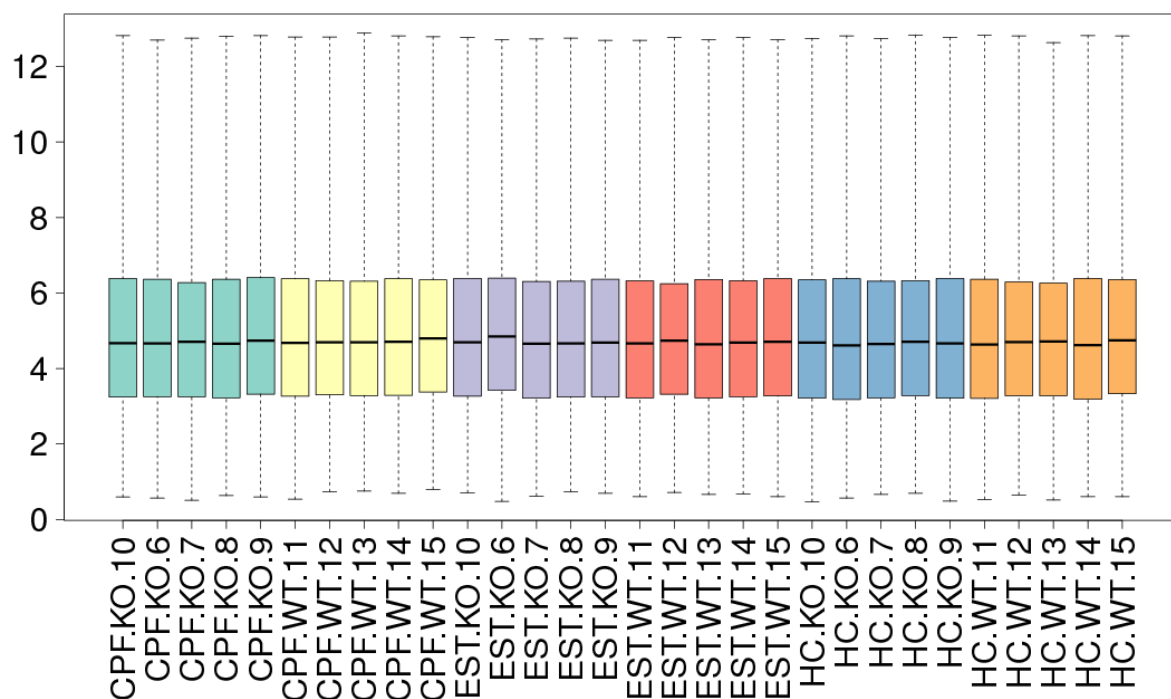

**Figure 1** - Probe intensity readings distributions among samples. Intensities represented in logarithmic scale after background removal and normalization.

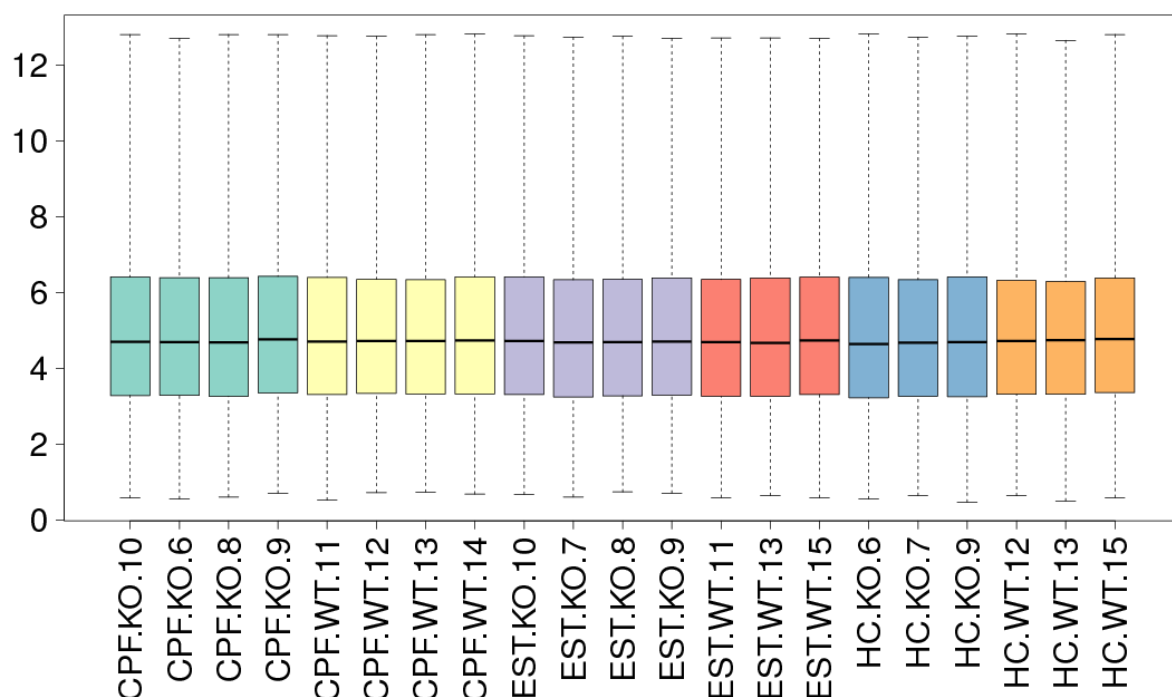

**Figure 2** - Probe intensity readings distributions among samples without outliers. Intensities represented in logarithmic scale after background removal and normalization.

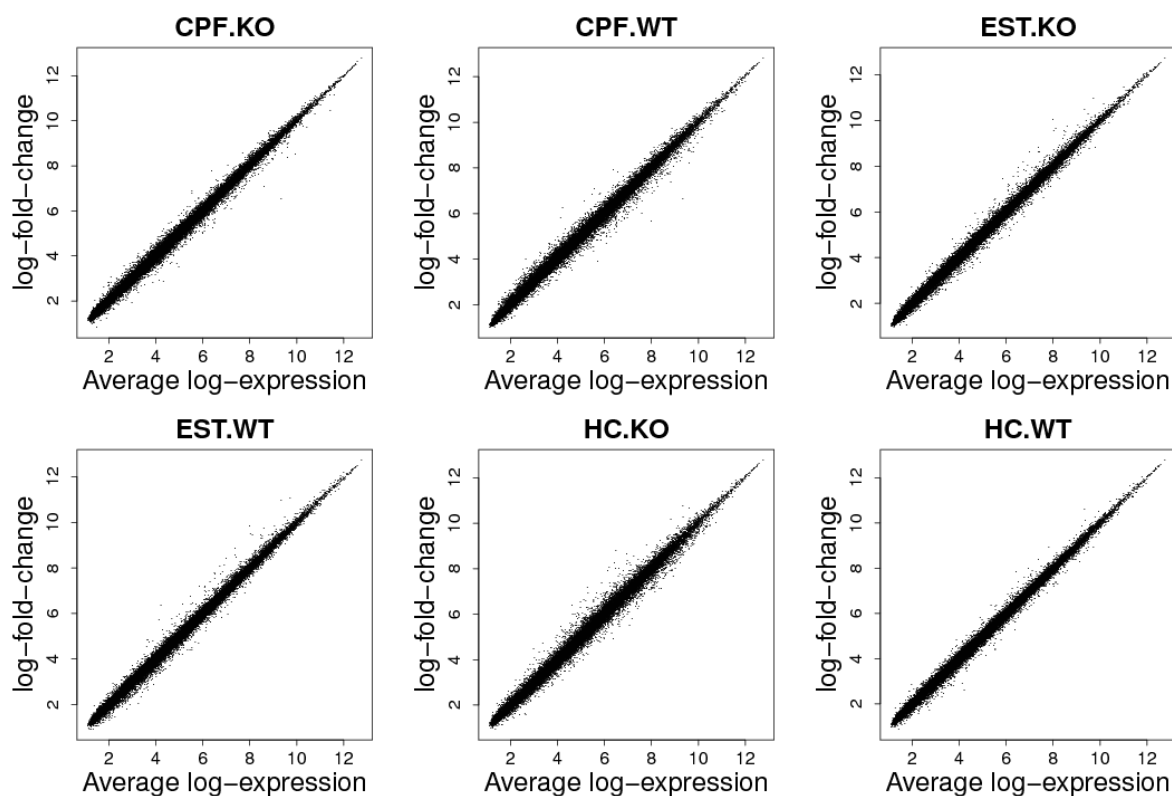

**Figure 3** - Intensity readings variation for each phenotype as a correlation of expression values. Values calculated by the average of replicates of each phenotype, excluding the replicated being analysed. Log-fold-change as it relates to the average.

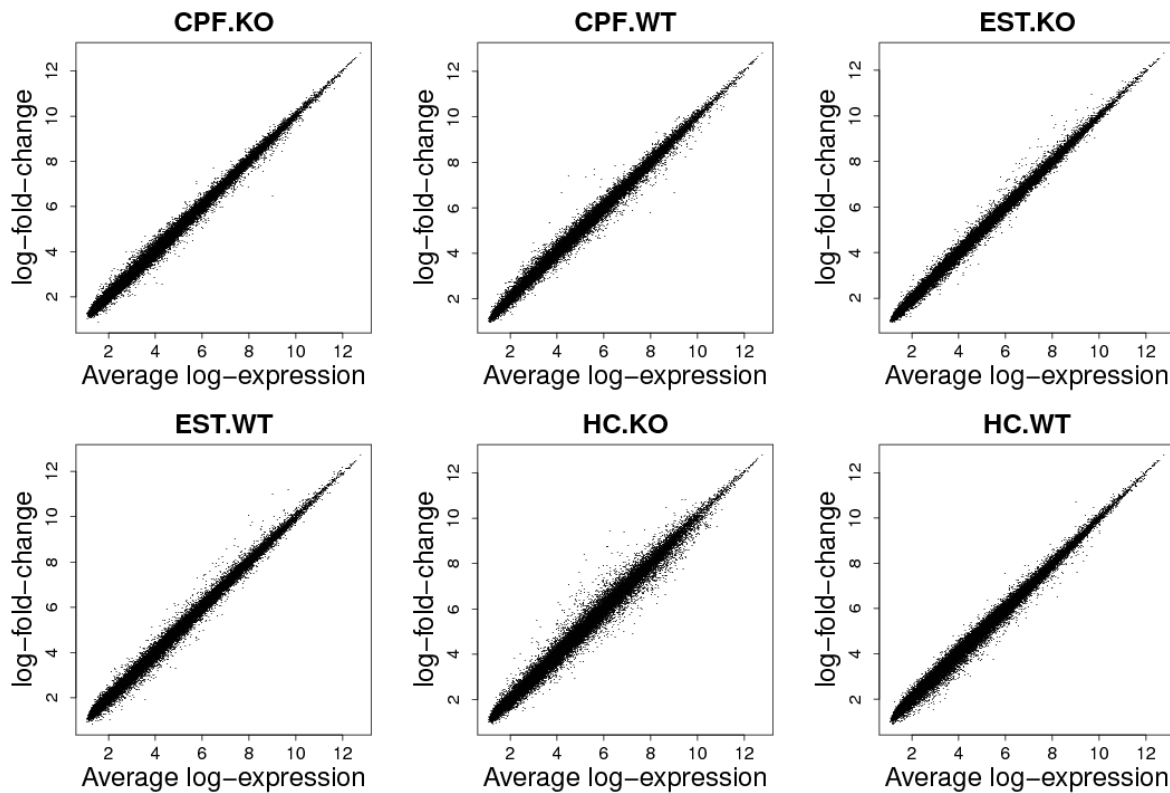

**Figure 4** - Intensity readings variation for each phenotype as a correlation of expression values without outlier samples. Values calculated with the average of replicates of each phenotype, excluding the replicated being analyse, with log-fold-change as it relates to this average.

### Samples correlation

Using the normalized expression data, in the form of the adjusted linear model coefficients, a sample distance matrix was constructed and a *Principal Components Analysis* (PCA) was executed. The matrix was used to render a heatmap with clustering. This analysis allowed us to asses that some of the samples, especially from the HC, did not conform to the behavior of the majority of replicates in some of the treatments (note that in Figure 3a the expression behavior of the replicates of treatments is not uniform, especially for HC, and so we decided to remove the outliers). For these samples, a second concomitant analysis was performed, excluding samples placed far from the immediate radius of the majority of replicates of each phenotype. That yielded a reduction of at least 1 replicate per phenotype, 2 in the case of the HC.

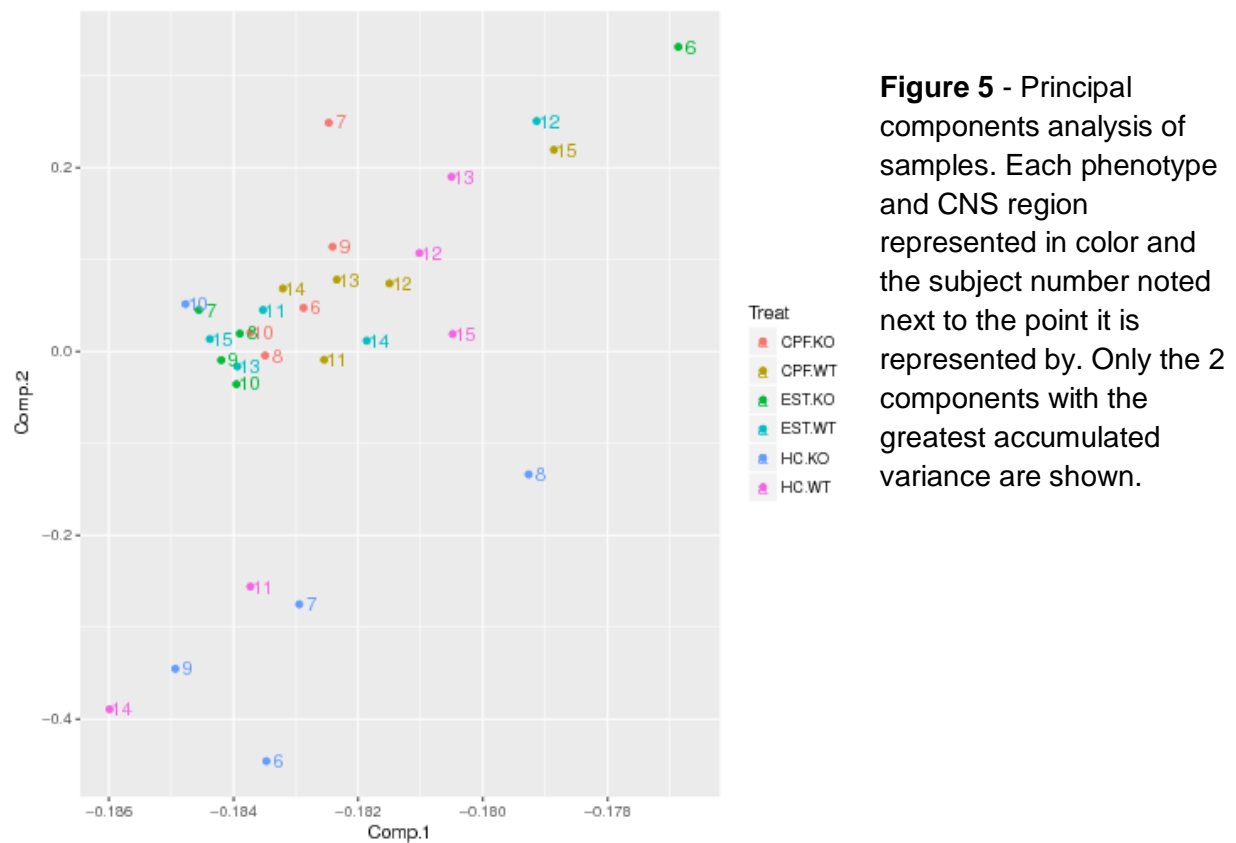

**Figure 5** - Principal components analysis of samples. Each phenotype and CNS region represented in color and the subject number noted next to the point it is represented by. Only the 2 components with the greatest accumulated variance are shown.

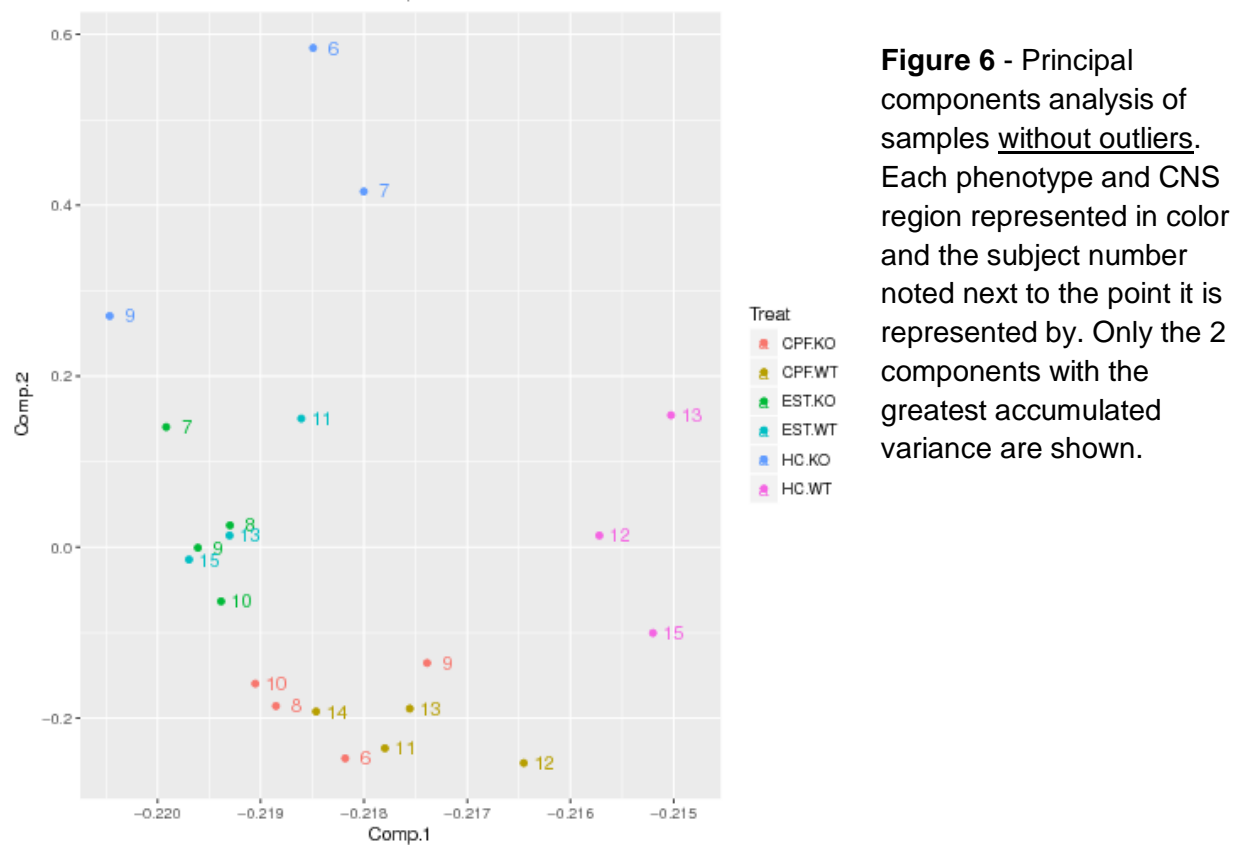

**Figure 6** - Principal components analysis of samples without outliers. Each phenotype and CNS region represented in color and the subject number noted next to the point it is represented by. Only the 2 components with the greatest accumulated variance are shown.

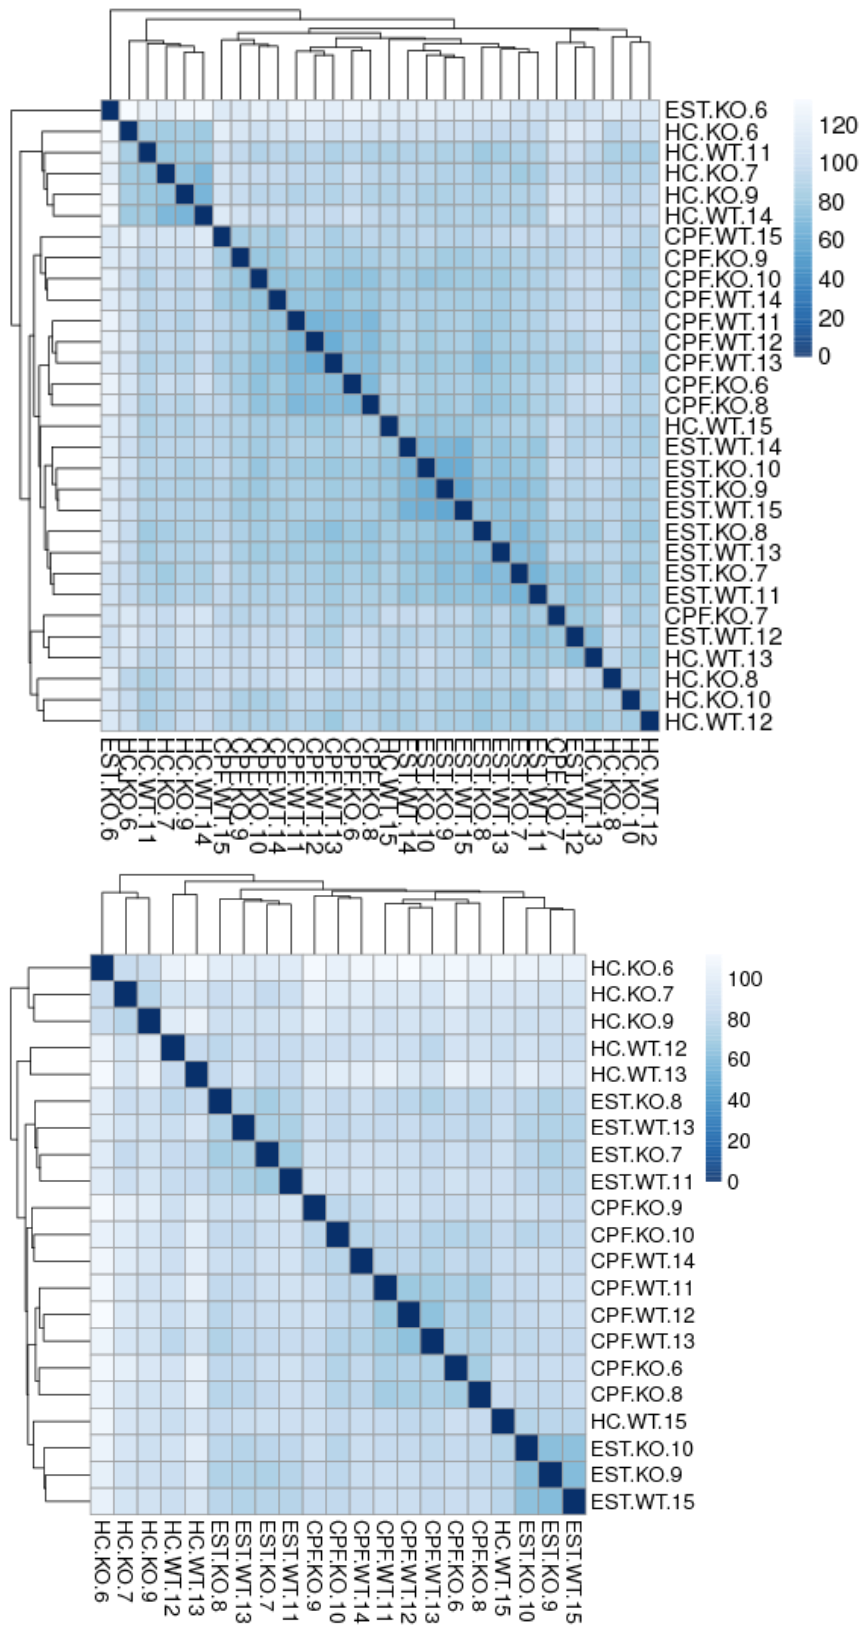

**Figure 7** - Sample distance based heatmap and clustering. The distance reflects the expression measurements for each sample. Lower distances, of more related samples, are in darker blue and higher, less related samples, in lighter shades. The accompanying dendrogram is a representation of the hierarchical clustering on distances procedure. The bottom heatmap and clustering figure is from samples without outliers.

### Differential expression (DE) testing

For these procedures three phenotype comparisons were used, only those between the same CNS region and only WT versus THOP1<sup>-/-</sup> (KO): CPF.WT-CPF.KO, EST.WT-EST.KO, HC.WT-HC.KO.

Using a false discovery rate (adjusted P-value; Q-value) cut-off of 0.05 only the TDP gene was found to be differentially expressed (DE) in any sample set scopes of CPF and EST. The only other DEs found were 6 reporter control probe sets of the microarray and a mitochondrially encoded tRNA cysteine in the CPF comparison. That was not the case of HC samples. With the full sample set HC.WT-HC.KO yielded the same result, only TDP was DE. However, excluding outlier samples it yielded 395 DEs, including TDP and having the same 6 reporters controls DE.

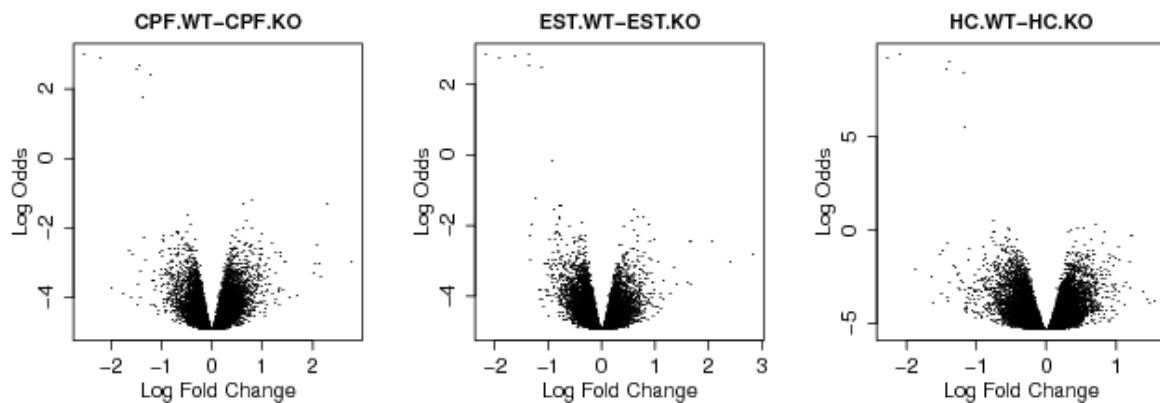

**Figure 8** - Correlation of DE probability by expression change rate in comparisons. Higher Log Odds represent higher DE probability.

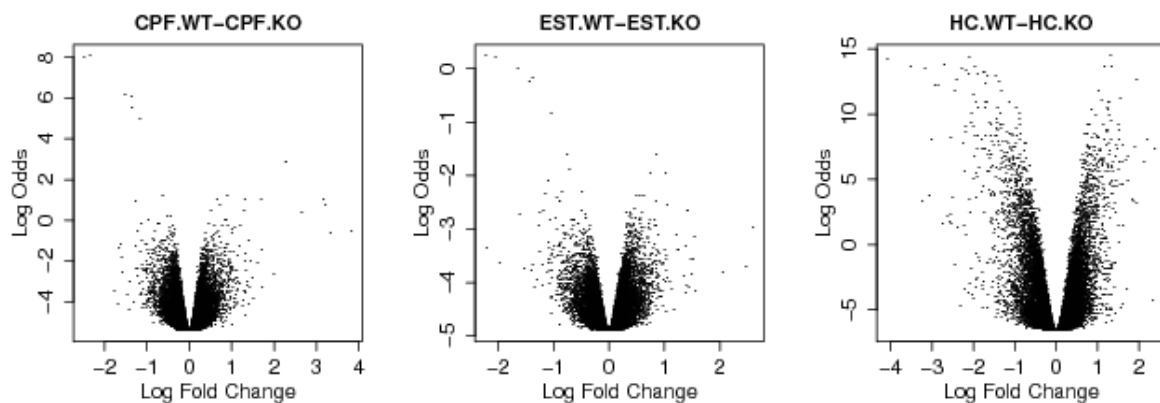



**Figure 9** - Correlation of DE probability by expression change rate in comparisons without outlier samples. Higher Log Odds represent higher DE probability.

From the HC DEs, the top 5 genes were, in order of decreasing Q-value, an uncharacterized LOC101056001 locus, Pcbd1 - pterin 4 alpha carbinolamine dehydratase/dimerization cofactor of hepatocyte nuclear factor 1 alpha (TCF1) 1, Glra1 - glycine receptor - alpha 1 subunit, RAB37 - member RAS oncogene family and Dlgap2 - discs large (Drosophila) homolog-associated protein 2.

### DE classification

Among the gene ontology categories of the HC DEs without outlier samples, as found through the Panther GO tool, those found with highest frequency were: cellular process in the Biological Process set, binding in the molecular function set and cell part in the Cellular Component set.

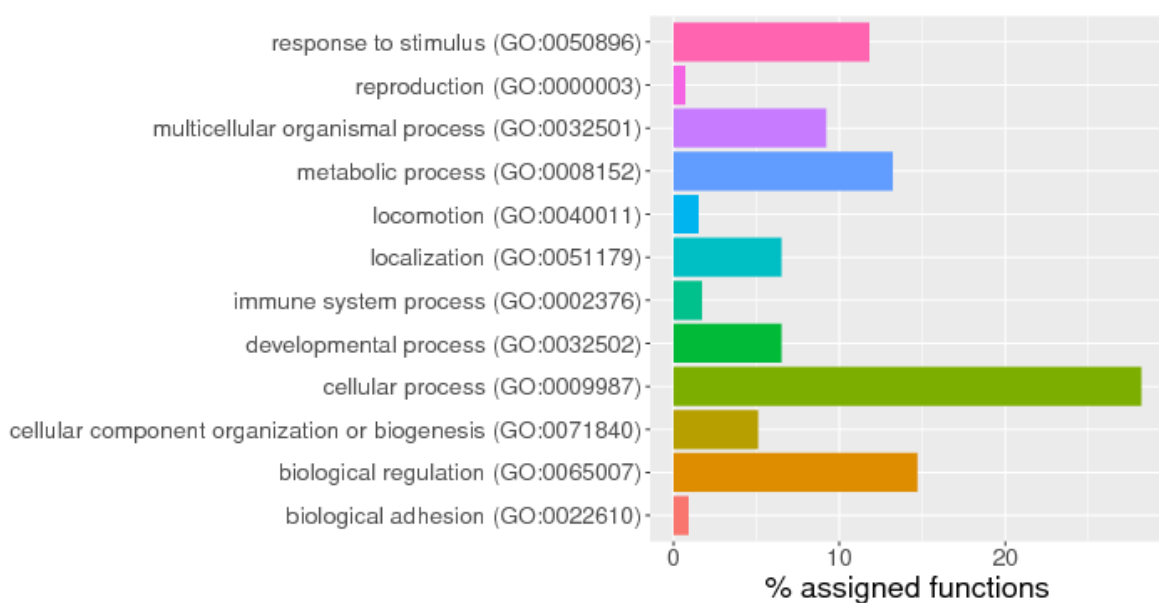

**Figure10** - Biological Process categories found among the DE genes through PantherDB GO.

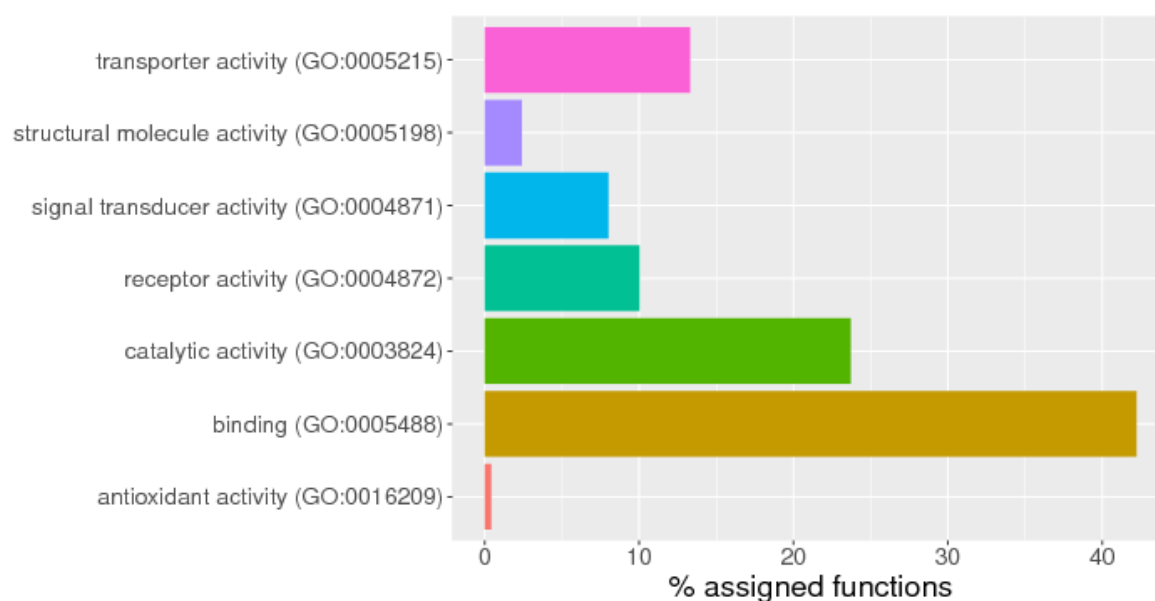

**Figure 11** - Molecular function categories found among the DE genes through PantherDB GO.

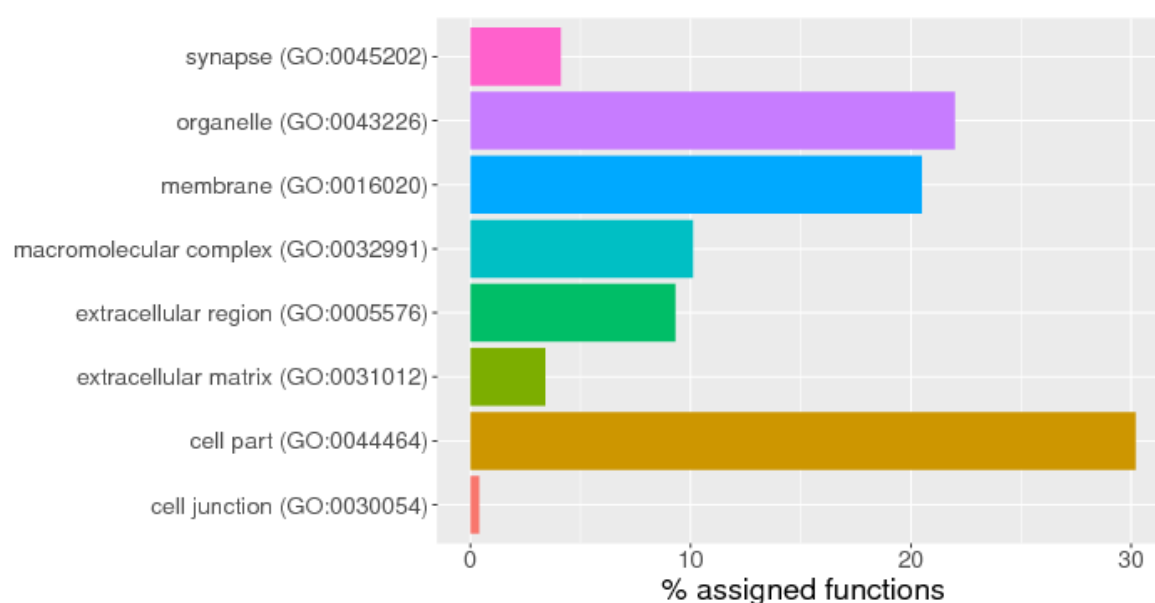

**Figure 12** - Cellular Component categories found among the DE genes through PantherDB GO.

By the classification of proteins, the categories of chaperone, hydrolase, membrane trafficking protein and, mainly, oxy-uterase were found.

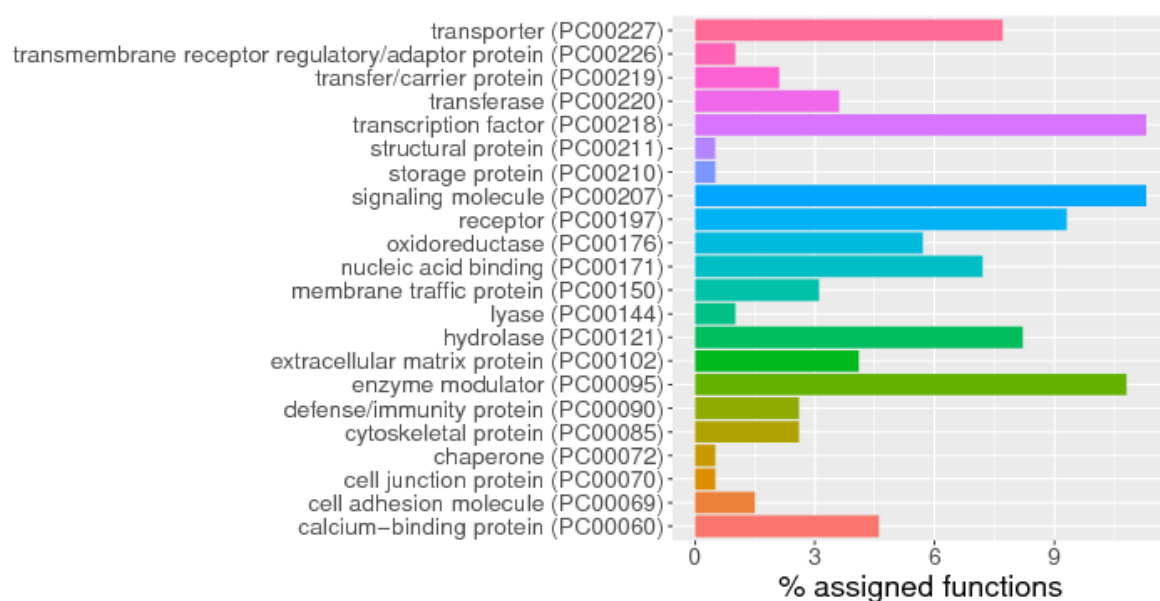

**Figure 13** - Panther protein categories found among the DE genes through PantherDB.

**Table 1** - Pathways categories found among the DE genes through PantherDB

|                                                                                            |                                                                                   |
|--------------------------------------------------------------------------------------------|-----------------------------------------------------------------------------------|
| Axon guidance mediated by netrin (P00009)                                                  | Toll receptor signaling pathway (P00054)                                          |
| Beta3 adrenergic receptor signaling pathway (P04379)                                       | T cell activation (P00053)                                                        |
| Axon guidance mediated by Slit/Robo (P00008)                                               | FGF signaling pathway (P00021)                                                    |
| Metabotropic glutamate receptor group III pathway (P00039)                                 | TGF-beta signaling pathway (P00052)                                               |
| Beta2 adrenergic receptor signaling pathway (P04378)                                       | Oxytocin receptor mediated signaling pathway (P04391)                             |
| Beta1 adrenergic receptor signaling pathway (P04377)                                       | Endothelin signaling pathway (P00019)                                             |
| Apoptosis signaling pathway (P00006)                                                       | EGF receptor signaling pathway (P00018)                                           |
| 5HT4 type receptor mediated signaling pathway (P04376)                                     | p38 MAPK pathway (P05918)                                                         |
| Angiogenesis (P00005)                                                                      | Parkinson disease (P00049)                                                        |
| Ionotropic glutamate receptor pathway (P00037)                                             | Opioid proopiomelanocortin pathway (P05917)                                       |
| Purine metabolism (P02769)                                                                 | PDGF signaling pathway (P00047)                                                   |
| 5HT3 type receptor mediated signaling pathway (P04375)                                     | Opioid prodynorphin pathway (P05916)                                              |
| Alzheimer disease-presenilin pathway (P00004)                                              | Oxidative stress response (P00046)                                                |
| 5HT2 type receptor mediated signaling pathway (P04374)                                     | Opioid proenkephalin pathway (P05915)                                             |
| Alzheimer disease-amyloid secretase pathway (P00003)                                       | Histamine H1 receptor mediated signaling pathway (P04385)                         |
| 5HT1 type receptor mediated signaling pathway (P04373)                                     | Notch signaling pathway (P00045)                                                  |
| Alpha adrenergic receptor signaling pathway (P00002)                                       | Nicotinic acetylcholine receptor signaling pathway (P00044)                       |
| 5-Hydroxytryptamine degradation (P04372)                                                   | Cadherin signaling pathway (P00012)                                               |
| Adrenaline and noradrenaline biosynthesis (P00001)                                         | Muscarinic acetylcholine receptor 2 and 4 signaling pathway (P00043)              |
| 5-Hydroxytryptamine biosynthesis (P04371)                                                  | Blood coagulation (P00011)                                                        |
| Inflammation mediated by chemokine and cytokine signaling pathway (P00031)                 | Dopamine receptor mediated signaling pathway (P05912)                             |
| Nicotine pharmacodynamics pathway (P06587)                                                 | Muscarinic acetylcholine receptor 1 and 3 signaling pathway (P00042)              |
| Synaptic vesicle trafficking (P05734)                                                      | B cell activation (P00010)                                                        |
| Huntington disease (P00029)                                                                | Angiotensin II-stimulated signaling through G proteins and beta-arrestin (P05911) |
| Heterotrimeric G-protein signaling pathway-Gq alpha and Go alpha mediated pathway (P00027) | Metabotropic glutamate receptor group I pathway (P00041)                          |
| Heterotrimeric G-protein signaling pathway-Gi alpha and Gs alpha mediated pathway (P00026) | Corticotropin releasing factor receptor signaling pathway (P04380)                |
| Wnt signaling pathway (P00057)                                                             | Metabotropic glutamate receptor group II pathway (P00040)                         |
| Vitamin D metabolism and pathway (P04396)                                                  | CCKR signaling map (P06959)                                                       |
| VEGF signaling pathway (P00056)                                                            |                                                                                   |
| Xanthine and guanine salvage pathway (P02788)                                              |                                                                                   |
| Thyrotropin-releasing hormone receptor signaling pathway (P04394)                          |                                                                                   |

An overrepresentation test was also executed with the PantherDB tools, revealing categories that have been enriched or diminished in relation to what is expected of a random sampling of the genome at a FDR lower than 0.05. The highest fold enrichment or reduction found per category set were, in order: neuromuscular synaptic transmission and sensory perception of smell in the Biological Process set, proteinaceous extracellular matrix and no reductions in the Cellular Component set, neuropeptide hormone activity and no reduction in the Molecular Function set, GABA receptor and no reduction in the PANTHER Protein Classes, 5HT3 type receptor mediated signaling pathway and no reduction in the PANTHER Pathways and Na<sup>+</sup>/Cl<sup>-</sup> dependent neurotransmitter transporters and no reduction in the Reactome pathways.

**Table 2** - PantherDB set categories relevantly enriched or diminished among the DE genes

|                                                       | HC.WT-HC.KO.DE | fold<br>Enrichment | FDR      |
|-------------------------------------------------------|----------------|--------------------|----------|
| <b>PANTHER GO-Slim Biological Process</b>             |                |                    |          |
| sensory perception of smell (GO:0007608)              | 0              | < 0.01             | 2.08E-03 |
| sensory perception of chemical stimulus (GO:0007606)  | 0              | < 0.01             | 1.09E-03 |
| sensory perception (GO:0007600)                       | 3              | .24                | 2.24E-02 |
| cellular process (GO:0009987)                         | 165            | 1.32               | 3.22E-04 |
| regulation of biological process (GO:0050789)         | 70             | 1.48               | 1.08E-02 |
| biological regulation (GO:0065007)                    | 86             | 1.54               | 8.98E-04 |
| multicellular organismal process (GO:0032501)         | 54             | 1.66               | 4.19E-03 |
| signal transduction (GO:0007165)                      | 69             | 1.67               | 8.47E-04 |
| single-multicellular organism process (GO:0044707)    | 54             | 1.67               | 4.28E-03 |
| developmental process (GO:0032502)                    | 38             | 1.76               | 1.29E-02 |
| system process (GO:0003008)                           | 38             | 1.79               | 8.65E-03 |
| neurological system process (GO:0050877)              | 37             | 1.86               | 6.37E-03 |
| cell communication (GO:0007154)                       | 88             | 1.88               | 3.09E-07 |
| anion transport (GO:0006820)                          | 10             | 2.85               | 3.34E-02 |
| mesoderm development (GO:0007498)                     | 11             | 2.91               | 2.16E-02 |
| ectoderm development (GO:0007398)                     | 9              | 3.03               | 3.29E-02 |
| response to endogenous stimulus (GO:0009719)          | 10             | 3.06               | 2.21E-02 |
| ion transport (GO:0006811)                            | 20             | 3.58               | 8.60E-05 |
| cell-cell signaling (GO:0007267)                      | 31             | 3.69               | 1.41E-07 |
| cell growth (GO:0016049)                              | 6              | 4.29               | 3.22E-02 |
| amino acid transport (GO:0006865)                     | 6              | 5.00               | 2.00E-02 |
| synaptic transmission (GO:0007268)                    | 29             | 5.18               | 5.39E-10 |
| neurotransmitter secretion (GO:0007269)               | 7              | 5.21               | 8.20E-03 |
| behavior (GO:0007610)                                 | 5              | 5.74               | 2.32E-02 |
| neuron-neuron synaptic transmission (GO:0007270)      | 10             | 7.87               | 8.37E-05 |
| synaptic vesicle exocytosis (GO:0016079)              | 7              | 8.45               | 9.64E-04 |
| neuromuscular synaptic transmission (GO:0007274)      | 6              | 8.94               | 2.17E-03 |
| <b>PANTHER GO-Slim Cellular Component</b>             |                |                    |          |
| proteinaceous extracellular matrix (GO:0005578)       | 7              | 7.78               | 7.38E-04 |
| axon (GO:0030424)                                     | 4              | 6.36               | 2.68E-02 |
| synapse (GO:0045202)                                  | 11             | 5.92               | 1.68E-04 |
| neuron projection (GO:0043005)                        | 18             | 5.02               | 3.69E-06 |
| extracellular matrix (GO:0031012)                     | 9              | 4.47               | 2.60E-03 |
| dendrite (GO:0030425)                                 | 6              | 3.85               | 3.10E-02 |
| cytoplasmic membrane-bounded vesicle (GO:0016023)     | 10             | 3.63               | 4.54E-03 |
| cell projection (GO:0042995)                          | 19             | 3.44               | 1.20E-04 |
| integral to membrane (GO:0016021)                     | 32             | 2.15               | 8.59E-04 |
| extracellular region (GO:0005576)                     | 25             | 1.98               | 8.64E-03 |
| plasma membrane (GO:0005886)                          | 47             | 1.90               | 5.27E-04 |
| extracellular space (GO:0005615)                      | 20             | 1.88               | 3.59E-02 |
| membrane (GO:0016020)                                 | 55             | 1.62               | 3.93E-03 |
| <b>PANTHER GO-Slim Molecular Function</b>             |                |                    |          |
| neuropeptide hormone activity (GO:0005184)            | 4              | 23.34              | 1.31E-03 |
| neurotransmitter transporter activity (GO:0005326)    | 6              | 16.80              | 1.95E-04 |
| voltage-gated potassium channel activity (GO:0005249) | 9              | 10.00              | 4.87E-05 |
| voltage-gated ion channel activity (GO:0005244)       | 9              | 7.08               | 2.80E-04 |
| hormone activity (GO:0005179)                         | 5              | 5.65               | 3.75E-02 |

|                                                                                            |     |       |          |
|--------------------------------------------------------------------------------------------|-----|-------|----------|
| ligand-gated ion channel activity (GO:0015276)                                             | 10  | 5.34  | 7.76E-04 |
| amino acid transmembrane transporter activity (GO:0015171)                                 | 5   | 5.15  | 4.72E-02 |
| ion channel activity (GO:0005216)                                                          | 19  | 4.03  | 5.85E-05 |
| lipase activity (GO:0016298)                                                               | 7   | 3.92  | 3.71E-02 |
| sequence-specific DNA binding RNA polymerase II transcription factor activity (GO:0000981) | 10  | 3.06  | 3.48E-02 |
| transmembrane transporter activity (GO:0022857)                                            | 32  | 2.71  | 1.16E-04 |
| receptor binding (GO:0005102)                                                              | 33  | 2.44  | 1.59E-04 |
| transporter activity (GO:0005215)                                                          | 33  | 2.41  | 1.62E-04 |
| protein binding (GO:0005515)                                                               | 64  | 1.60  | 3.26E-03 |
| binding (GO:0005488)                                                                       | 105 | 1.40  | 3.33E-03 |
| <b>PANTHER Protein Class</b>                                                               |     |       |          |
| acetylcholine receptor (PC00037)                                                           | 6   | 10.00 | 1.19E-02 |
| GABA receptor (PC00023)                                                                    | 6   | 10.00 | 5.97E-03 |
| signaling molecule (PC00207)                                                               | 22  | 2.35  | 2.30E-02 |
| <b>PANTHER Pathways</b>                                                                    |     |       |          |
| 5HT3 type receptor mediated signaling pathway (P04375)                                     | 3   | 14.00 | 2.25E-02 |
| Adrenaline and noradrenaline biosynthesis (P00001)                                         | 6   | 13.55 | 6.51E-04 |
| Alpha adrenergic receptor signaling pathway (P00002)                                       | 4   | 12.18 | 9.50E-03 |
| Muscarinic acetylcholine receptor 1 and 3 signaling pathway (P00042)                       | 10  | 11.67 | 8.16E-06 |
| Nicotine pharmacodynamics pathway (P06587)                                                 | 5   | 10.00 | 5.49E-03 |
| Synaptic vesicle trafficking (P05734)                                                      | 4   | 10.00 | 1.38E-02 |
| 5HT2 type receptor mediated signaling pathway (P04374)                                     | 9   | 9.55  | 8.82E-05 |
| Thyrotropin-releasing hormone receptor signaling pathway (P04394)                          | 7   | 8.17  | 1.77E-03 |
| Histamine H1 receptor mediated signaling pathway (P04385)                                  | 5   | 8.14  | 9.12E-03 |
| Oxytocin receptor mediated signaling pathway (P04391)                                      | 6   | 7.37  | 5.25E-03 |
| Dopamine receptor mediated signaling pathway (P05912)                                      | 5   | 6.36  | 1.95E-02 |
| Muscarinic acetylcholine receptor 2 and 4 signaling pathway (P00043)                       | 5   | 5.74  | 2.42E-02 |
| Nicotinic acetylcholine receptor signaling pathway (P00044)                                | 7   | 5.10  | 9.52E-03 |
| CCKR signaling map (P06959)                                                                | 10  | 4.38  | 4.22E-03 |
| Heterotrimeric G-protein signaling pathway-Gq alpha and Go alpha mediated pathway (P00027) | 7   | 4.08  | 2.37E-02 |
| <b>Reactome pathways</b>                                                                   |     |       |          |
| Na <sup>+</sup> /Cl <sup>-</sup> dependent neurotransmitter transporters (R-MMU-442660)    | 5   | 18.42 | 4.62E-03 |
| Synthesis of IP3 and IP4 in the cytosol (R-MMU-1855204)                                    | 5   | 14.00 | 1.08E-02 |
| Voltage gated Potassium channels (R-MMU-1296072)                                           | 7   | 11.67 | 2.68E-03 |
| Inositol phosphate metabolism (R-MMU-1483249)                                              | 6   | 9.55  | 1.18E-02 |
| Neurotransmitter Release Cycle (R-MMU-112310)                                              | 6   | 8.94  | 1.35E-02 |
| Potassium Channels (R-MMU-1296071)                                                         | 9   | 6.50  | 4.17E-03 |
| G alpha (q) signalling events (R-MMU-416476)                                               | 15  | 6.33  | 3.49E-05 |
| Sphingolipid metabolism (R-MMU-428157)                                                     | 7   | 6.13  | 2.67E-02 |
| Neuronal System (R-MMU-112316)                                                             | 23  | 5.24  | 5.46E-07 |
| Transmission across Chemical Synapses (R-MMU-112315)                                       | 13  | 4.69  | 3.09E-03 |
| Peptide ligand-binding receptors (R-MMU-375276)                                            | 10  | 3.91  | 3.94E-02 |
| Class A/1 (Rhodopsin-like receptors) (R-MMU-373076)                                        | 14  | 3.44  | 1.45E-02 |
| Gastrin-CREB signalling pathway via PKC and MAPK (R-MMU-881907)                            | 18  | 3.33  | 4.45E-03 |
| Platelet activation, signaling and aggregation (R-MMU-76002)                               | 12  | 3.29  | 4.37E-02 |
| GPCR ligand binding (R-MMU-500792)                                                         | 16  | 2.94  | 2.24E-02 |

StringDB is an interactome network constructing tool that compiles evidence from several databases and the literature. Among the StringDB THOP1 interacting genes none has been found DE. As for the chromosome 10 genomic neighbors of THOP1 , a receptor accessory protein 6 (REEP6) and a EEF2 pseudogene, none have been found DE as well. That is, the THOP1 *knockout* assay does not seem to have directly influenced close by genes. A StringDB network was also constructed for the DE, which yielded 54 genes been included in 19 clusters, of which only 31 in 5 clusters have 3 or more genes. That is, 31 genes in 5 clusters seem to form interactome modules altered by the mutation of THOP1 in the HC. An enrichment analysis of the StringDB included genes yielded the following top relevant

category sets: regulation of multicellular organismal process in the Biological Process set, synapse part in Cellular Component set, ligand-gated ion channel activity in the Molecular Function set, Potassium channel voltage-dependent EAG/ELK/ERG in the InterPro classification and Calcium signaling pathway in KEGG pathways set.

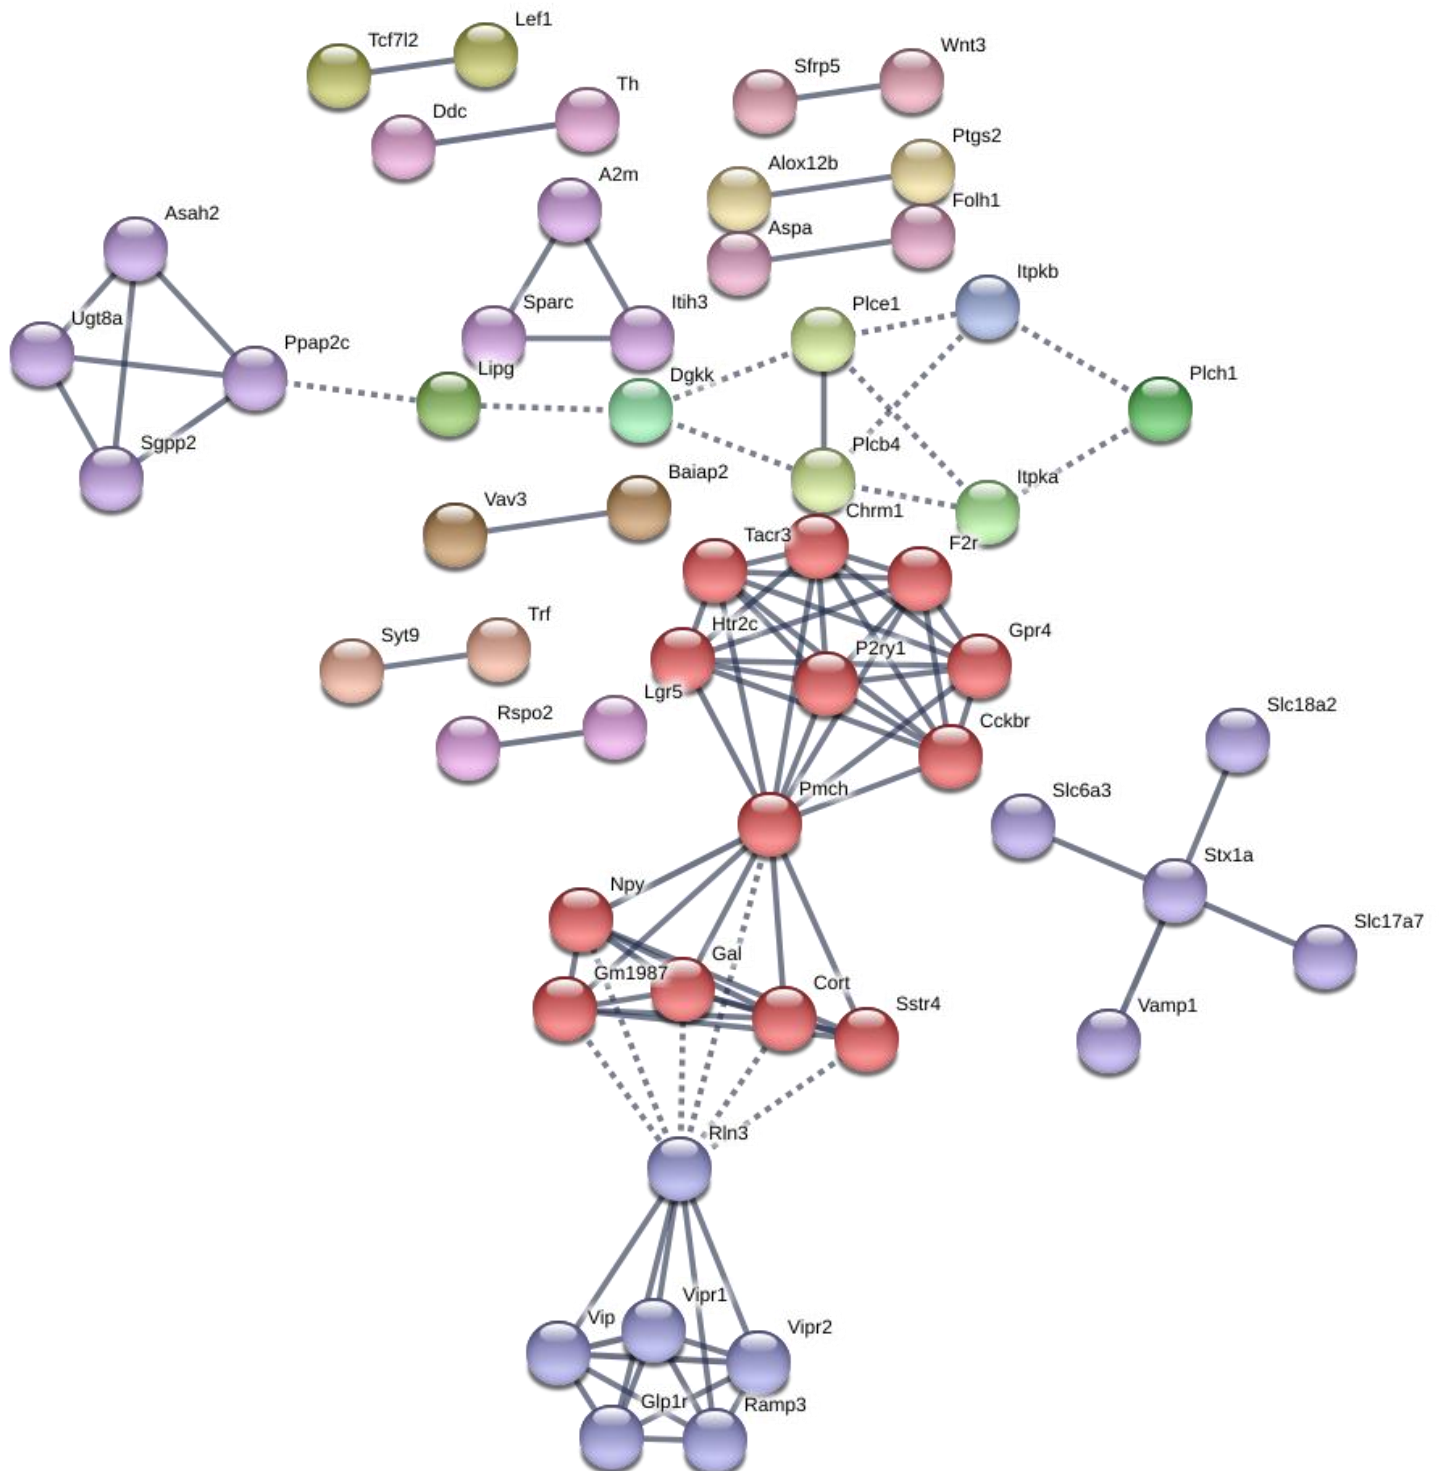

**Figure 14** - StringDB DE interacting genes network. Stronger bonds between nodes correspond to stronger evidence of interaction. Same color nodes belong to more likely interacting genes, as per the MCL clustering method.

**Table 3** - Gene categories enriched in the StringDB network interacting DE genes

| #ID                       | pathway description                             | observed<br>gene<br>count | false<br>discovery<br>rate |            |                                                                                                                 |             |
|---------------------------|-------------------------------------------------|---------------------------|----------------------------|------------|-----------------------------------------------------------------------------------------------------------------|-------------|
| <b>Cellular Component</b> |                                                 |                           |                            | GO.0003674 | molecular_function                                                                                              | 179 0.00247 |
| GO.0044456                | synapse part                                    | 33                        | 7.38e-11                   | GO.0015075 | ion transmembrane transporter activity                                                                          | 24 0.00247  |
| GO.0043005                | neuron projection                               | 39                        | 2.48e-09                   | GO.0015267 | channel activity                                                                                                | 17 0.00247  |
| GO.0045202                | synapse                                         | 34                        | 2.48e-09                   | GO.0022891 | substrate-specific transmembrane transporter activity                                                           | 25 0.00247  |
| GO.0044459                | plasma membrane part                            | 61                        | 4.89e-09                   | GO.0022892 | substrate-specific transporter activity                                                                         | 28 0.00247  |
| GO.0097458                | neuron part                                     | 44                        | 4.89e-09                   | GO.0038023 | signaling receptor activity                                                                                     | 29 0.00247  |
| GO.0097060                | synaptic membrane                               | 20                        | 2.97e-08                   | GO.0005216 | ion channel activity                                                                                            | 16 0.00292  |
| GO.0045211                | postsynaptic membrane                           | 18                        | 5.42e-08                   | GO.0000976 | transcription regulatory region sequence-specific DNA binding                                                   | 21 0.00373  |
| GO.0036477                | somatodendritic compartment                     | 28                        | 7.75e-07                   | GO.0022857 | transmembrane transporter activity                                                                              | 26 0.00373  |
| GO.0071944                | cell periphery                                  | 90                        | 9.27e-07                   | GO.0005215 | transporter activity                                                                                            | 30 0.00414  |
| GO.0098794                | postsynapse                                     | 21                        | 9.27e-07                   | GO.0060089 | molecular transducer activity                                                                                   | 35 0.00424  |
| GO.0098590                | plasma membrane region                          | 33                        | 1.7e-06                    | GO.0005488 | binding                                                                                                         | 154 0.00431 |
| GO.0005886                | plasma membrane                                 | 87                        | 2.75e-06                   | GO.0000977 | RNA polymerase II regulatory region sequence-specific DNA binding                                               | 19 0.00578  |
| GO.0031226                | intrinsic component of plasma membrane          | 35                        | 4.75e-06                   | GO.0001228 | transcriptional activator activity, RNA polymerase II transcription regulatory region sequence-specific binding | 15 0.00578  |
| GO.0098589                | membrane region                                 | 36                        | 4.75e-06                   | GO.0005231 | excitatory extracellular ligand-gated ion channel activity                                                      | 6 0.00578   |
| GO.0031224                | intrinsic component of membrane                 | 102                       | 6.69e-06                   | GO.0000982 | transcription factor activity, RNA polymerase II core promoter proximal region sequence-specific binding        | 15 0.00599  |
| GO.0043025                | neuronal cell body                              | 20                        | 9.26e-06                   | GO.0005515 | protein binding                                                                                                 | 90 0.00599  |
| GO.0044425                | membrane part                                   | 114                       | 9.62e-06                   | GO.0044212 | transcription regulatory region DNA binding                                                                     | 23 0.00599  |
| GO.0005887                | integral component of plasma membrane           | 33                        | 1.08e-05                   | GO.0004872 | receptor activity                                                                                               | 29 0.00935  |
| GO.0042995                | cell projection                                 | 47                        | 1.66e-05                   | GO.0001077 | transcriptional activator activity, RNA polymerase II core promoter proximal region sequence-specific binding   | 12 0.00977  |
| GO.0016021                | integral component of membrane                  | 98                        | 1.7e-05                    | GO.0005249 | voltage-gated potassium channel activity                                                                        | 7 0.00977   |
| GO.0044297                | cell body                                       | 21                        | 1.7e-05                    | GO.0008324 | cation transmembrane transporter activity                                                                       | 18 0.0189   |
| GO.0030425                | dendrite                                        | 19                        | 0.000164                   | GO.0001046 | core promoter sequence-specific DNA binding                                                                     | 7 0.0219    |
| GO.0030054                | cell junction                                   | 34                        | 0.000167                   | GO.0022890 | inorganic cation transmembrane transporter activity                                                             | 16 0.0224   |
| GO.0030424                | axon                                            | 17                        | 0.00035                    | GO.0015370 | solute:sodium symporter activity                                                                                | 5 0.0236    |
| GO.0098805                | whole membrane                                  | 45                        | 0.000369                   | GO.0000978 | RNA polymerase II core promoter proximal region sequence-specific DNA binding                                   | 13 0.0261   |
| GO.0030672                | synaptic vesicle membrane                       | 7                         | 0.000487                   | GO.0022843 | voltage-gated cation channel activity                                                                           | 8 0.0356    |
| GO.0014069                | postsynaptic density                            | 11                        | 0.0023                     | GO.0005179 | hormone activity                                                                                                | 5 0.0395    |
| GO.1902495                | transmembrane transporter complex               | 13                        | 0.00242                    | GO.0015077 | monovalent inorganic cation                                                                                     | 12 0.0408   |
| GO.0008021                | synaptic vesicle                                | 9                         | 0.00256                    |            |                                                                                                                 |             |
| GO.0034702                | ion channel complex                             | 12                        | 0.00347                    |            |                                                                                                                 |             |
| GO.0016020                | membrane                                        | 129                       | 0.00467                    |            |                                                                                                                 |             |
| GO.0032589                | neuron projection membrane                      | 5                         | 0.00467                    |            |                                                                                                                 |             |
| GO.0098793                | presynapse                                      | 9                         | 0.00546                    |            |                                                                                                                 |             |
| GO.0032590                | dendrite membrane                               | 4                         | 0.00963                    |            |                                                                                                                 |             |
| GO.0044463                | cell projection part                            | 24                        | 0.00963                    |            |                                                                                                                 |             |
| GO.0005575                | cellular_component                              | 214                       | 0.0108                     |            |                                                                                                                 |             |
| GO.0009986                | cell surface                                    | 21                        | 0.0275                     |            |                                                                                                                 |             |
| GO.0044433                | cytoplasmic vesicle part                        | 14                        | 0.0275                     |            |                                                                                                                 |             |
| <b>Molecular Function</b> |                                                 |                           |                            |            |                                                                                                                 |             |
| GO.0015276                | ligand-gated ion channel activity               | 11                        | 0.00167                    |            |                                                                                                                 |             |
| GO.0022836                | gated channel activity                          | 16                        | 0.00167                    |            |                                                                                                                 |             |
| GO.0004871                | signal transducer activity                      | 35                        | 0.00196                    |            |                                                                                                                 |             |
| GO.0005230                | extracellular ligand-gated ion channel activity | 8                         | 0.00196                    |            |                                                                                                                 |             |
| GO.0043565                | sequence-specific DNA binding                   | 29                        | 0.00206                    |            |                                                                                                                 |             |
| GO.0046873                | metal ion transmembrane transporter activity    | 17                        | 0.00206                    |            |                                                                                                                 |             |

|                           |                                                         |     |          |
|---------------------------|---------------------------------------------------------|-----|----------|
|                           | transmembrane transporter activity                      |     |          |
| GO.0005261                | cation channel activity                                 | 11  | 0.0452   |
| GO.0004699                | calcium-independent protein kinase C activity           | 2   | 0.0483   |
| GO.0004999                | vasoactive intestinal polypeptide receptor activity     | 2   | 0.0483   |
| GO.0015081                | sodium ion transmembrane transporter activity           | 7   | 0.0483   |
| <b>InterPro</b>           |                                                         |     |          |
| IPR003938                 | Potassium channel, voltage-dependent, EAG/ELK/ERG       | 4   | 0.0146   |
| <b>KEGG</b>               |                                                         |     |          |
| 4020                      | Calcium signaling pathway                               | 14  | 5.18e-05 |
| 4080                      | Neuroactive ligand-receptor interaction                 | 17  | 5.79e-05 |
| 5033                      | Nicotine addiction                                      | 6   | 0.00162  |
| 5031                      | Amphetamine addiction                                   | 7   | 0.00163  |
| 4725                      | Cholinergic synapse                                     | 8   | 0.00831  |
| 4723                      | Retrograde endocannabinoid signaling                    | 7   | 0.0219   |
| 5030                      | Cocaine addiction                                       | 5   | 0.0219   |
| 5034                      | Alcoholism                                              | 8   | 0.0265   |
| 562                       | Inositol phosphate metabolism                           | 5   | 0.0437   |
| 4721                      | Synaptic vesicle cycle                                  | 5   | 0.0437   |
| <b>Biological Process</b> |                                                         |     |          |
| GO.0051239                | regulation of multicellular organismal process          | 74  | 5.91e-10 |
| GO.0007610                | behavior                                                | 32  | 3.61e-09 |
| GO.0065008                | regulation of biological quality                        | 76  | 3.61e-09 |
| GO.0007399                | nervous system development                              | 61  | 1.06e-08 |
| GO.0022008                | neurogenesis                                            | 49  | 3.46e-08 |
| GO.0044708                | single-organism behavior                                | 26  | 6.09e-08 |
| GO.0007154                | cell communication                                      | 91  | 7.46e-08 |
| GO.0007267                | cell-cell signaling                                     | 29  | 7.46e-08 |
| GO.0044700                | single organism signaling                               | 89  | 7.46e-08 |
| GO.0048699                | generation of neurons                                   | 46  | 7.46e-08 |
| GO.0051240                | positive regulation of multicellular organismal process | 48  | 7.46e-08 |
| GO.0032501                | multicellular organismal process                        | 115 | 7.91e-08 |
| GO.0044707                | single-multicellular organism process                   | 112 | 1.09e-07 |
| GO.0007268                | synaptic transmission                                   | 21  | 1.06e-06 |
| GO.0051094                | positive regulation of developmental process            | 41  | 1.1e-06  |
| GO.0007165                | signal transduction                                     | 81  | 2.11e-06 |
| GO.0044763                | single-organism cellular process                        | 165 | 2.11e-06 |
| GO.0044767                | single-organism developmental process                   | 102 | 3.52e-06 |
| GO.0048167                | regulation of synaptic plasticity                       | 13  | 3.92e-06 |
| GO.0050896                | response to stimulus                                    | 114 | 4.37e-06 |
| GO.0050793                | regulation of developmental process                     | 58  | 5.23e-06 |
| GO.0051960                | regulation of nervous system development                | 30  | 5.23e-06 |
| GO.2000026                | regulation of multicellular organismal development      | 48  | 5.23e-06 |
| GO.0032879                | regulation of localization                              | 58  | 5.33e-06 |
| GO.0051716                | cellular response to stimulus                           | 98  | 5.91e-06 |
| GO.0030154                | cell differentiation                                    | 76  | 6.18e-06 |
| GO.0050803                | regulation of synapse structure or activity             | 16  | 8.34e-06 |
| GO.0007186                | G-protein coupled receptor signaling pathway            | 31  | 9.91e-06 |
| GO.0003008                | system process                                          | 40  | 9.97e-06 |
| GO.0007275                | multicellular organismal development                    | 91  | 9.97e-06 |
| GO.0050804                | modulation of synaptic transmission                     | 17  | 1.05e-05 |
| GO.0048518                | positive regulation of                                  | 100 | 1.82e-05 |

|            |                                                         |     |          |
|------------|---------------------------------------------------------|-----|----------|
|            | biological process                                      |     |          |
| GO.0045597 | positive regulation of cell differentiation             | 31  | 2.28e-05 |
| GO.0048731 | system development                                      | 81  | 2.72e-05 |
| GO.0030001 | metal ion transport                                     | 24  | 3.11e-05 |
| GO.0050767 | regulation of neurogenesis                              | 26  | 3.14e-05 |
| GO.0030182 | neuron differentiation                                  | 31  | 3.79e-05 |
| GO.0050890 | cognition                                               | 16  | 3.84e-05 |
| GO.0051962 | positive regulation of nervous system development       | 21  | 4.25e-05 |
| GO.0007611 | learning or memory                                      | 15  | 4.51e-05 |
| GO.0048522 | positive regulation of cellular process                 | 89  | 4.56e-05 |
| GO.0050794 | regulation of cellular process                          | 143 | 5.18e-05 |
| GO.0043269 | regulation of ion transport                             | 24  | 5.45e-05 |
| GO.0060284 | regulation of cell development                          | 29  | 6.49e-05 |
| GO.0048468 | cell development                                        | 44  | 7.07e-05 |
| GO.0065007 | biological regulation                                   | 153 | 7.33e-05 |
| GO.0010975 | regulation of neuron projection development             | 18  | 0.000112 |
| GO.0044057 | regulation of system process                            | 19  | 0.000113 |
| GO.0051241 | negative regulation of multicellular organismal process | 32  | 0.000113 |
| GO.0051049 | regulation of transport                                 | 44  | 0.000126 |
| GO.0031344 | regulation of cell projection organization              | 21  | 0.000128 |
| GO.0007218 | neuropeptide signaling pathway                          | 10  | 0.000129 |
| GO.0022603 | regulation of anatomical structure morphogenesis        | 30  | 0.000132 |
| GO.0048856 | anatomical structure development                        | 88  | 0.000134 |
| GO.0044699 | single-organism process                                 | 168 | 0.000136 |
| GO.0009605 | response to external stimulus                           | 43  | 0.000183 |
| GO.0050769 | positive regulation of neurogenesis                     | 18  | 0.000201 |
| GO.0045664 | regulation of neuron differentiation                    | 21  | 0.000307 |
| GO.0010720 | positive regulation of cell development                 | 20  | 0.000344 |
| GO.0045595 | regulation of cell differentiation                      | 41  | 0.000344 |
| GO.0010646 | regulation of cell communication                        | 59  | 0.000375 |
| GO.0016477 | cell migration                                          | 25  | 0.000419 |
| GO.0050789 | regulation of biological process                        | 144 | 0.000561 |
| GO.0007417 | central nervous system development                      | 28  | 0.000664 |
| GO.0023051 | regulation of signaling                                 | 56  | 0.000667 |
| GO.0044765 | single-organism transport                               | 56  | 0.000667 |
| GO.0048666 | neuron development                                      | 24  | 0.000772 |
| GO.0050877 | neurological system process                             | 28  | 0.000772 |
| GO.0007274 | neuromuscular synaptic transmission                     | 5   | 0.000911 |
| GO.0001503 | ossification                                            | 14  | 0.000957 |
| GO.0009725 | response to hormone                                     | 25  | 0.00122  |
| GO.0007626 | locomotory behavior                                     | 13  | 0.00126  |
| GO.0006811 | ion transport                                           | 31  | 0.00135  |
| GO.0007423 | sensory organ development                               | 21  | 0.00137  |
| GO.0055082 | cellular chemical homeostasis                           | 19  | 0.00162  |
| GO.0050773 | regulation of dendrite development                      | 9   | 0.00177  |
| GO.0048513 | organ development                                       | 61  | 0.00179  |
| GO.0090596 | sensory organ morphogenesis                             | 14  | 0.00192  |
| GO.0051179 | localization                                            | 79  | 0.00198  |
| GO.0006812 | cation transport                                        | 24  | 0.00206  |
| GO.0051674 | localization of cell                                    | 25  | 0.00206  |
| GO.0048598 | embryonic morphogenesis                                 | 22  | 0.00216  |
| GO.0048562 | embryonic organ morphogenesis                           | 15  | 0.00223  |
| GO.0010769 | regulation of cell morphogenesis involved in            | 14  | 0.00248  |



|                 |                                                                         |    |         |                 |                                                            |    |        |
|-----------------|-------------------------------------------------------------------------|----|---------|-----------------|------------------------------------------------------------|----|--------|
| differentiation |                                                                         |    |         | differentiation |                                                            |    |        |
| GO.1902578      | single-organism localization                                            | 57 | 0.00248 | GO.0040011      | locomotion                                                 | 27 | 0.0118 |
| GO.0034220      | ion transmembrane transport                                             | 24 | 0.00252 | GO.0023056      | positive regulation of signaling                           | 33 | 0.0121 |
| GO.0048545      | response to steroid hormone                                             | 17 | 0.00258 | GO.0031644      | regulation of neurological system process                  | 6  | 0.0127 |
| GO.0050801      | ion homeostasis                                                         | 19 | 0.00268 | GO.0098655      | cation transmembrane transport                             | 18 | 0.0147 |
| GO.0055080      | cation homeostasis                                                      | 18 | 0.00279 | GO.1903522      | regulation of blood circulation                            | 10 | 0.0159 |
| GO.0072507      | divalent inorganic cation homeostasis                                   | 14 | 0.00279 | GO.0034765      | regulation of ion transmembrane transport                  | 14 | 0.0164 |
| GO.0030003      | cellular cation homeostasis                                             | 16 | 0.00291 | GO.0007631      | feeding behavior                                           | 7  | 0.0177 |
| GO.0048878      | chemical homeostasis                                                    | 25 | 0.00291 | GO.0009888      | tissue development                                         | 38 | 0.0177 |
| GO.0060998      | regulation of dendritic spine development                               | 6  | 0.0032  | GO.0015842      | synaptic vesicle amine transport                           | 2  | 0.0177 |
| GO.0001964      | startle response                                                        | 5  | 0.0035  | GO.0033076      | isoquinoline alkaloid metabolic process                    | 2  | 0.0177 |
| GO.0030900      | forebrain development                                                   | 16 | 0.0037  | GO.0035759      | mesangial cell-matrix adhesion                             | 2  | 0.0177 |
| GO.0042592      | homeostatic process                                                     | 33 | 0.0037  | GO.0051602      | response to electrical stimulus                            | 5  | 0.0177 |
| GO.0009719      | response to endogenous stimulus                                         | 32 | 0.00372 | GO.0052314      | phytoalexin metabolic process                              | 2  | 0.0177 |
| GO.0098771      | inorganic ion homeostasis                                               | 18 | 0.00397 | GO.0010721      | negative regulation of cell development                    | 12 | 0.0177 |
| GO.0030534      | adult behavior                                                          | 10 | 0.00404 | GO.0006366      | transcription from RNA polymerase II promoter              | 17 | 0.0182 |
| GO.0055074      | calcium ion homeostasis                                                 | 13 | 0.00409 | GO.0042127      | regulation of cell proliferation                           | 33 | 0.0184 |
| GO.0098660      | inorganic ion transmembrane transport                                   | 19 | 0.00409 | GO.0048839      | inner ear development                                      | 10 | 0.0184 |
| GO.0009891      | positive regulation of biosynthetic process                             | 42 | 0.00436 | GO.0060384      | innervation                                                | 4  | 0.0186 |
| GO.0072503      | cellular divalent inorganic cation homeostasis                          | 13 | 0.00456 | GO.0043627      | response to estrogen                                       | 10 | 0.0190 |
| GO.0060322      | head development                                                        | 23 | 0.00478 | GO.0006836      | neurotransmitter transport                                 | 8  | 0.0192 |
| GO.0010035      | response to inorganic substance                                         | 16 | 0.00508 | GO.0033993      | response to lipid                                          | 22 | 0.0195 |
| GO.0045665      | negative regulation of neuron differentiation                           | 10 | 0.00508 | GO.0051961      | negative regulation of nervous system development          | 11 | 0.0195 |
| GO.0007420      | brain development                                                       | 22 | 0.0055  | GO.0042220      | response to cocaine                                        | 5  | 0.0204 |
| GO.0055065      | metal ion homeostasis                                                   | 16 | 0.0055  | GO.0046903      | secretion                                                  | 16 | 0.0205 |
| GO.0009887      | organ morphogenesis                                                     | 27 | 0.00565 | GO.0051173      | positive regulation of nitrogen compound metabolic process | 39 | 0.0205 |
| GO.0010038      | response to metal ion                                                   | 13 | 0.00574 | GO.0060429      | epithelium development                                     | 27 | 0.0213 |
| GO.0031328      | positive regulation of cellular biosynthetic process                    | 41 | 0.00579 | GO.0032355      | response to estradiol                                      | 8  | 0.0217 |
| GO.0014070      | response to organic cyclic compound                                     | 24 | 0.00605 | GO.0042471      | ear morphogenesis                                          | 8  | 0.0217 |
| GO.0021543      | pallium development                                                     | 10 | 0.00605 | GO.0042493      | response to drug                                           | 15 | 0.0224 |
| GO.0007612      | learning                                                                | 9  | 0.00658 | GO.0010647      | positive regulation of cell communication                  | 34 | 0.0225 |
| GO.0051480      | cytosolic calcium ion homeostasis                                       | 10 | 0.00734 | GO.0051047      | positive regulation of secretion                           | 13 | 0.0229 |
| GO.0048583      | regulation of response to stimulus                                      | 59 | 0.00762 | GO.0048664      | neuron fate determination                                  | 3  | 0.0230 |
| GO.0022604      | regulation of cell morphogenesis                                        | 17 | 0.00832 | GO.0060341      | regulation of cellular localization                        | 28 | 0.0230 |
| GO.0010243      | response to organonitrogen compound                                     | 21 | 0.00844 | GO.0021872      | forebrain generation of neurons                            | 6  | 0.0231 |
| GO.0006875      | cellular metal ion homeostasis                                          | 14 | 0.00854 | GO.0031214      | biomineral tissue development                              | 6  | 0.0231 |
| GO.0042472      | inner ear morphogenesis                                                 | 8  | 0.00874 | GO.0048814      | regulation of dendrite morphogenesis                       | 6  | 0.0231 |
| GO.0000160      | phosphorelay signal transduction system                                 | 3  | 0.00915 | GO.0048519      | negative regulation of biological process                  | 74 | 0.0232 |
| GO.0006874      | cellular calcium ion homeostasis                                        | 12 | 0.00915 | GO.1901700      | response to oxygen-containing compound                     | 29 | 0.0245 |
| GO.0007204      | positive regulation of cytosolic calcium ion concentration              | 9  | 0.00915 | GO.0010976      | positive regulation of neuron projection development       | 10 | 0.0247 |
| GO.0008284      | positive regulation of cell proliferation                               | 23 | 0.00915 | GO.0021761      | limbic system development                                  | 7  | 0.0248 |
| GO.0021902      | commitment of neuronal cell to specific neuron type in forebrain        | 3  | 0.00915 | GO.0021766      | hippocampus development                                    | 6  | 0.0265 |
| GO.0045666      | positive regulation of neuron differentiation                           | 13 | 0.00915 | GO.0043270      | positive regulation of ion transport                       | 10 | 0.0274 |
| GO.0051592      | response to calcium ion                                                 | 8  | 0.0102  | GO.0006928      | movement of cell or subcellular component                  | 27 | 0.0289 |
| GO.0055085      | transmembrane transport                                                 | 26 | 0.0109  | GO.0048568      | embryonic organ development                                | 16 | 0.0290 |
| GO.1903530      | regulation of secretion by cell                                         | 19 | 0.0109  | GO.0098662      | inorganic cation transmembrane transport                   | 15 | 0.0304 |
| GO.0051046      | regulation of secretion                                                 | 20 | 0.0111  | GO.0009893      | positive regulation of metabolic process                   | 62 | 0.0306 |
| GO.0051050      | positive regulation of transport                                        | 24 | 0.0113  | GO.0031345      | negative regulation of cell                                | 7  | 0.0306 |
| GO.0007200      | phospholipase C-activating G-protein coupled receptor signaling pathway | 6  | 0.0118  |                 |                                                            |    |        |
| GO.0021879      | forebrain neuron                                                        | 6  | 0.0118  |                 |                                                            |    |        |

|            |                                                          |    |        |
|------------|----------------------------------------------------------|----|--------|
|            | projection organization                                  |    |        |
| GO.1903532 | positive regulation of secretion by cell                 | 12 | 0.0309 |
| GO.0006935 | chemotaxis                                               | 14 | 0.0324 |
| GO.0060326 | cell chemotaxis                                          | 8  | 0.0324 |
| GO.0001667 | ameboidal-type cell migration                            | 8  | 0.0336 |
| GO.0060563 | neuroepithelial cell differentiation                     | 6  | 0.0336 |
| GO.0061001 | regulation of dendritic spine morphogenesis              | 4  | 0.0338 |
| GO.0032835 | glomerulus development                                   | 5  | 0.0354 |
| GO.0042416 | dopamine biosynthetic process                            | 3  | 0.0359 |
| GO.0009966 | regulation of signal transduction                        | 44 | 0.0363 |
| GO.0031325 | positive regulation of cellular metabolic process        | 53 | 0.0368 |
| GO.0031914 | negative regulation of synaptic plasticity               | 2  | 0.0371 |
| GO.0046684 | response to pyrethroid                                   | 2  | 0.0371 |
| GO.0071864 | positive regulation of cell proliferation in bone marrow | 2  | 0.0371 |
| GO.0071895 | odontoblast differentiation                              | 2  | 0.0371 |
| GO.1903524 | positive regulation of blood circulation                 | 6  | 0.0371 |
| GO.0021953 | central nervous system neuron differentiation            | 9  | 0.0385 |
| GO.0043583 | ear development                                          | 10 | 0.0385 |
| GO.0035725 | sodium ion transmembrane                                 | 7  | 0.0393 |

|            |                                                                         |    |        |
|------------|-------------------------------------------------------------------------|----|--------|
|            | transport                                                               |    |        |
| GO.0035295 | tube development                                                        | 19 | 0.0396 |
| GO.0006810 | transport                                                               | 58 | 0.0408 |
| GO.0010770 | positive regulation of cell morphogenesis involved in differentiation   | 8  | 0.0432 |
| GO.0030902 | hindbrain development                                                   | 8  | 0.0432 |
| GO.0001654 | eye development                                                         | 13 | 0.0446 |
| GO.0032940 | secretion by cell                                                       | 13 | 0.0446 |
| GO.0031175 | neuron projection development                                           | 16 | 0.0450 |
| GO.0051128 | regulation of cellular component organization                           | 43 | 0.0450 |
| GO.0007166 | cell surface receptor signaling pathway                                 | 33 | 0.0456 |
| GO.0032350 | regulation of hormone metabolic process                                 | 4  | 0.0456 |
| GO.0050808 | synapse organization                                                    | 7  | 0.0467 |
| GO.0043065 | positive regulation of apoptotic process                                | 16 | 0.0472 |
| GO.0008217 | regulation of blood pressure                                            | 8  | 0.0476 |
| GO.0045935 | positive regulation of nucleobase-containing compound metabolic process | 36 | 0.0476 |
| GO.0071805 | potassium ion transmembrane transport                                   | 7  | 0.0483 |
| GO.0010557 | positive regulation of macromolecule biosynthetic process               | 35 | 0.0495 |
