# Supplementary material for: Thimet Oligopeptidase (EC 3.4.24.15) Key Functions Suggested by Knockout Mice Phenotype Characterization
Source: Biomolecules. 2019 Aug 19;9(8):382. doi: 10.3390/biom9080382 (PMC6722639; doi:10.3390/biom9080382)
Supplement: Supplementary file 1 [file biomolecules-09-00382-s001.zip]

Archive with 6 entries (6 files):
- Microarray data Supp.pdf
- Supp - Individual MS identification and quantitation.pdf
- Supp - Mascot MS-MS + labeling + quantitation.pdf
- Supplementary Figures 1-3 behavior studies.pdf
- TNF Western blots crude data and membranes.pdf
- Trap THOP1 Knockout generation Supp.pdf
